# Supplementary material
Source: publisher figshare collection journal article supplement (https://gsapubs.figshare.com/articles/dataset/_/19765762)
Supplement: Supplementary file 1 [file 1]

## Sheet: Sheet1
Table S1. LA-ICP-MS Zircon U-Pb age of the Akeyazi HABs, Calc-alk granoids, and Akeyazi sandstones
Sample	Content (ppm)		Th/U	Isotope ratio							Isotope age（Ma）
	Th	U		207Pb/206Pb	1σ	207Pb/235U	1σ	206Pb/238U	1σ		207Pb/206Pb	1σ	207Pb/235U	1σ	206Pb/238U	1σ
AK13 (n=25)
AK13-01	135.42	209.14	0.647509	0.05494	0.00199	0.49772	0.01825	0.06572	0.00119		410	50	410	12	410	7
AK13-02	1408.98	1056.37	1.33379	0.05501	0.00127	0.50071	0.01241	0.06603	0.00108		413	28	412	8	412	7
AK13-03	256.17	287.49	0.891057	0.05517	0.00178	0.50038	0.01651	0.06579	0.00115		419	43	412	11	411	7
AK13-04	887.35	808.26	1.09785	0.05328	0.00122	0.49297	0.01218	0.06711	0.0011		341	28	407	8	419	7
AK13-05	860.38	685.06	1.25592	0.05522	0.00132	0.50928	0.013	0.0669	0.0011		421	29	418	9	417	7
AK13-06	404.01	485.71	0.831793	0.05505	0.00135	0.49882	0.01296	0.06572	0.00109		414	30	411	9	410	7
AK13-07	208.74	247.43	0.843633	0.05492	0.00193	0.50758	0.01809	0.06703	0.00119		409	48	417	12	418	7
AK13-08	1834.03	1234.42	1.48574	0.05496	0.00125	0.51479	0.01261	0.06793	0.00111		411	28	422	8	424	7
AK13-09	162.54	230.03	0.706603	0.05508	0.00218	0.50192	0.0201	0.06609	0.00117		415	58	413	14	413	7
AK13-10	199.85	322.43	0.619824	0.05495	0.00168	0.49449	0.01555	0.06526	0.00112		410	40	408	11	408	7
AK13-11	253.02	421.83	0.599815	0.05521	0.00142	0.50881	0.01375	0.06684	0.00112		421	32	418	9	417	7
AK13-12	179.41	295.26	0.607634	0.05518	0.00188	0.50664	0.01755	0.06658	0.00116		420	47	416	12	416	7
AK13-13	379.08	436.52	0.868414	0.05523	0.00154	0.51221	0.0148	0.06726	0.00113		422	36	420	10	420	7
AK13-14	253.99	333.82	0.760859	0.05526	0.00174	0.50405	0.01625	0.06614	0.00113		423	42	414	11	413	7
AK13-15	167.39	218.79	0.765072	0.05513	0.00213	0.51217	0.01986	0.06736	0.00122		417	54	420	13	420	7
AK13-16	762.77	590.49	1.29176	0.05504	0.00153	0.50119	0.01446	0.06602	0.00111		414	36	413	10	412	7
AK13-17	292.18	310.56	0.940817	0.05479	0.00196	0.51026	0.01853	0.06753	0.00116		404	51	419	12	421	7
AK13-18	2105.71	1402.82	1.50106	0.05499	0.00141	0.52267	0.01402	0.06892	0.00115		412	32	427	9	430	7
AK13-19	241.59	412.91	0.585091	0.05487	0.00149	0.49712	0.01397	0.0657	0.00111		407	34	410	9	410	7
AK13-20	556.67	602.32	0.92421	0.05517	0.00143	0.51417	0.01388	0.06758	0.00112		419	32	421	9	422	7
AK13-21	123.92	166.19	0.745653	0.05519	0.0028	0.49669	0.02505	0.06526	0.00124		420	79	409	17	408	8
AK13-22	116.42	216.7	0.53724	0.05518	0.0023	0.50131	0.02093	0.06587	0.00119		420	61	413	14	411	7
AK13-23	200.51	316.45	0.633623	0.05524	0.00181	0.50995	0.01701	0.06693	0.00115		422	44	418	11	418	7
AK13-24	343.16	425.12	0.807207	0.05454	0.00152	0.49908	0.01436	0.06634	0.00111		393	36	411	10	414	7
AK13-25	91.53	131.62	0.695411	0.05481	0.00304	0.50222	0.02788	0.06643	0.00122		404	91	413	19	415	7
AK14-1 (n=18)
AK14-1 01	159.45	306.44	0.52033	0.05523	0.0028	0.52171	0.02518	0.06851	0.00133		422	73	426	17	427	8
AK14-1 02	125.52	287.17	0.437093	0.05558	0.00182	0.52164	0.01629	0.06806	0.00099		436	44	426	11	424	6
AK14-1 03	156.62	273.25	0.573175	0.05648	0.00083	0.52849	0.0074	0.06786	0.00073		471	14	431	5	423	4
AK14-1 04	194.43	280.31	0.693625	0.05592	0.00351	0.52637	0.03148	0.06826	0.00158		449	92	429	21	426	10
AK14-1 05	122.59	273.65	0.447981	0.05466	0.00207	0.51831	0.0187	0.06877	0.00109		398	52	424	13	429	7
AK14-1 06	194.12	387.41	0.501071	0.05587	0.00101	0.52164	0.00898	0.06772	0.00077		447	19	426	6	422	5
AK14-1 07	97.04	206.42	0.470109	0.05549	0.00251	0.51975	0.02241	0.06792	0.00121		432	64	425	15	424	7
AK14-1 08	138.73	250.11	0.554676	0.05578	0.0019	0.52165	0.01691	0.06783	0.00101		444	46	426	11	423	6
AK14-1 09	143	288.24	0.496114	0.05526	0.001	0.52241	0.00899	0.06856	0.00078		423	20	427	6	427	5
AK14-1 10	177.93	315.67	0.563658	0.05449	0.00436	0.51554	0.03937	0.06862	0.00193		391	121	422	26	428	12
AK14-1 11	240.54	379.28	0.634202	0.05602	0.00179	0.52531	0.01603	0.06801	0.00098		453	42	429	11	424	6
AK14-1 12	137.12	276.49	0.495931	0.05475	0.00257	0.51686	0.02314	0.06847	0.00125		402	67	423	15	427	8
AK14-1 13	106.04	226.35	0.468478	0.05554	0.00107	0.5184	0.00951	0.06769	0.00078		434	21	424	6	422	5
AK14-1 14	296.95	486.98	0.609779	0.05648	0.00069	0.52553	0.00617	0.06749	0.00071		471	12	429	4	421	4
AK14-1 15	155.51	325.67	0.477508	0.05587	0.00369	0.52288	0.03288	0.06788	0.00163		447	97	427	22	423	10
AK14-1 16	115.51	256.81	0.449788	0.05555	0.00234	0.52032	0.02088	0.06794	0.00115		434	59	425	14	424	7
AK14-1 17	149.11	297.34	0.50148	0.05591	0.00261	0.51982	0.02316	0.06743	0.00123		449	66	425	15	421	7
AK14-1 18	182.61	314.79	0.580101	0.0557	0.00479	0.5208	0.04265	0.06782	0.00204		440	129	426	28	423	12
AK14-2 (n=29)
AK14-2-01	463.17	609.76	0.759594	0.05601	0.00352	0.55999	0.03238	0.07251	0.00228		453	74	452	21	451	14
AK14-2-02	182.96	308.26	0.593525	0.06219	0.00357	0.61467	0.03229	0.07168	0.00216		681	63	487	20	446	13
AK14-2-03	217.13	337.88	0.642625	0.06321	0.004	0.62014	0.03593	0.07115	0.00231		715	70	490	23	443	14
AK14-2-04	683.46	3134.71	0.21803	0.05787	0.00135	0.56628	0.01189	0.07097	0.0013		525	21	456	8	442	8
AK14-2-05	399.63	1560.44	0.256101	0.05527	0.00166	0.54953	0.01506	0.07211	0.00144		423	29	445	10	449	9
AK14-2-06	150.49	251.34	0.598751	0.06344	0.00397	0.63222	0.03609	0.07228	0.00235		723	68	497	22	450	14
AK14-2-07	81.63	166.13	0.491362	0.0551	0.0044	0.53614	0.03958	0.07057	0.00267		416	99	436	26	440	16
AK14-2-08	556.16	2900.31	0.191759	0.0571	0.0013	0.56173	0.01153	0.07135	0.0013		495	20	453	7	444	8
AK14-2-09	399.52	786.64	0.507882	0.05594	0.0024	0.5465	0.0215	0.07085	0.00173		450	46	443	14	441	10
AK14-2-10	173.96	324.01	0.536897	0.06059	0.00346	0.5924	0.03135	0.07091	0.00203		625	66	472	20	442	12
AK14-2-11	715.31	3666.34	0.195102	0.05578	0.00137	0.54161	0.01206	0.07043	0.00132		444	22	439	8	439	8
AK14-2-12	479.68	2982.12	0.160852	0.05591	0.00147	0.54956	0.01316	0.07129	0.00137		449	24	445	9	444	8
AK14-2-13	440.16	1553.9	0.283261	0.05535	0.0025	0.5458	0.02257	0.07152	0.00182		426	49	442	15	445	11
AK14-2-14	116.76	192.02	0.608062	0.05518	0.00449	0.54532	0.04076	0.07169	0.00286		420	97	442	27	446	17
AK14-2-15	322	1953.68	0.164817	0.05332	0.00149	0.52934	0.0135	0.07202	0.00142		342	27	431	9	448	9
AK14-2-16	1217.93	3740.89	0.325572	0.05273	0.00102	0.52074	0.00917	0.07164	0.00125		317	18	426	6	446	8
AK14-2-17	199.74	462.92	0.431478	0.05354	0.00335	0.53961	0.03102	0.07311	0.00236		352	73	438	20	455	14
AK14-2-18	305.62	455.65	0.670734	0.05328	0.00337	0.52285	0.03032	0.07119	0.00231		341	74	427	20	443	14
AK14-2-19	897.38	790.59	1.13508	0.05517	0.00309	0.54496	0.02796	0.07166	0.00212		419	64	442	18	446	13
AK14-2-20	1069.88	3665.53	0.291876	0.05209	0.00098	0.52805	0.00915	0.07356	0.00128		289	18	431	6	458	8
AK14-2-21	419.22	796.44	0.526367	0.05408	0.00281	0.53199	0.02532	0.07139	0.00203		374	58	433	17	445	12
AK14-2-22	308.43	1363.91	0.226137	0.05844	0.00333	0.57139	0.02955	0.07096	0.00221		546	61	459	19	442	13
AK14-2-23	335.25	2051.81	0.163392	0.05036	0.00157	0.4995	0.01431	0.07199	0.00149		212	32	411	10	448	9
AK14-2-24	670.77	1336.42	0.501916	0.05085	0.00137	0.50453	0.0125	0.07201	0.0014		234	26	415	8	448	8
AK14-2-25	628.49	3101.21	0.20266	0.0506	0.00108	0.49794	0.00985	0.07143	0.00128		223	20	410	7	445	8
AK14-2-26	59.44	123.24	0.482311	0.05716	0.00492	0.56647	0.0447	0.07194	0.00303		498	101	456	29	448	18
AK14-2-27	202.34	427.29	0.473543	0.05014	0.00295	0.49792	0.02708	0.07209	0.00217		201	72	410	18	449	13
AK14-2-28	89.04	189.6	0.46962	0.05616	0.00532	0.56895	0.04909	0.07355	0.00348		459	110	457	32	458	21
AK14-2-29	415.97	606.12	0.686283	0.05214	0.00427	0.52223	0.03924	0.07273	0.00294		292	100	427	26	453	18
AK14-4 (n=18)
AK14-4 01	159.45	306.44	0.52033	0.05603	0.00082	0.52342	0.00728	0.06774	0.00073		454	14	427	5	423	4
AK14-4 02	125.52	287.17	0.437093	0.05671	0.00085	0.53683	0.00767	0.06865	0.00074		480	15	436	5	428	4
AK14-4 03	156.62	273.25	0.573175	0.0555	0.00071	0.51723	0.00632	0.06759	0.00071		432	12	423	4	422	4
AK14-4 04	194.43	280.31	0.693625	0.05602	0.00078	0.52054	0.0069	0.06739	0.00072		453	13	426	5	420	4
AK14-4 05	122.59	273.65	0.447981	0.05595	0.0008	0.51587	0.00706	0.06687	0.00071		450	14	422	5	417	4
AK14-4 06	194.12	387.41	0.501071	0.05586	0.00087	0.52581	0.00783	0.06827	0.00074		447	16	429	5	426	4
AK14-4 07	97.04	206.42	0.470109	0.05576	0.00065	0.51658	0.00572	0.06719	0.00069		443	11	423	4	419	4
AK14-4 08	138.73	250.11	0.554676	0.05671	0.00097	0.52863	0.00862	0.06761	0.00075		480	18	431	6	422	5
AK14-4 09	143	288.24	0.496114	0.05537	0.00091	0.50533	0.00796	0.06619	0.00073		427	17	415	5	413	4
AK14-4 10	177.93	315.67	0.563658	0.05469	0.00082	0.51195	0.0073	0.0679	0.00073		400	15	420	5	423	4
AK14-4 11	240.54	379.28	0.634202	0.05635	0.00097	0.52573	0.00863	0.06768	0.00075		466	18	429	6	422	5
AK14-4 12	137.12	276.49	0.495931	0.05468	0.00074	0.50679	0.00651	0.06723	0.0007		399	13	416	4	419	4
AK14-4 13	106.04	226.35	0.468478	0.05569	0.0008	0.51123	0.007	0.06658	0.00071		440	14	419	5	416	4
AK14-4 14	296.95	486.98	0.609779	0.05536	0.00088	0.51417	0.00778	0.06736	0.00073		427	16	421	5	420	4
AK14-4 15	155.51	325.67	0.477508	0.05418	0.00091	0.50491	0.00812	0.06759	0.00074		379	18	415	5	422	4
AK14-4 16	115.51	256.81	0.449788	0.0558	0.0009	0.51944	0.00799	0.06752	0.00073		444	17	425	5	421	4
AK14-4 17	149.11	297.34	0.50148	0.05502	0.00081	0.51485	0.00721	0.06787	0.00072		413	15	422	5	423	4
AK14-4 18	182.61	314.79	0.580101	0.05486	0.00068	0.51083	0.00607	0.06754	0.0007		407	12	419	4	421	4
AK6 (n=192)
AK6-01	98.4022	204.676	0.48077	0.0565819	0.00150771	0.542285	0.0140339	0.0696916	0.000710374		475.97	57.4025	439.93	9.24424	434.298	4.28743
AK6-02	267.376	538.259	0.496743	0.0556174	0.00100899	0.554624	0.0105632	0.0721856	0.00080128		438.935	40.7375	448.021	6.90595	449.31	4.82372
AK6-03	582.482	1168.04	0.498683	0.0563307	0.000882586	0.576773	0.0101505	0.0743478	0.00100729		464.86	33.33	462.385	6.5441	462.297	6.04918
AK6-04	135.459	348.797	0.38836	0.0558537	0.00110098	0.568132	0.0119765	0.0736981	0.000850004		455.6	16.665	456.806	7.76113	458.397	5.10937
AK6-05	63.4958	203.481	0.312047	0.0551034	0.00147502	0.512101	0.0136778	0.0677715	0.000909534		416.715	61.105	419.861	9.18917	422.715	5.49583
AK6-06	287.283	631.319	0.455052	0.055882	0.000877268	0.564253	0.00954671	0.0732063	0.000832366		455.6	35.1825	454.291	6.20462	455.444	5.0058
AK6-07	205.283	281.265	0.729856	0.0576161	0.00121711	0.615667	0.0150524	0.0777451	0.00125627		516.705	41.6625	487.128	9.46566	482.649	7.51876
AK6-08	157.913	427.371	0.3695	0.0576802	0.00114069	0.565757	0.0118731	0.0711198	0.000824325		516.705	44.44	455.267	7.70587	442.898	4.96687
AK6-09	300.012	579.601	0.517618	0.0587879	0.00111401	0.636699	0.0134525	0.0783712	0.00101053		566.7	47.2125	500.261	8.35265	486.393	6.04655
AK6-10	254.794	509.695	0.499894	0.0567168	0.00107943	0.569063	0.0121936	0.0724928	0.000842146		479.67	40.7375	457.409	7.8969	451.156	5.06773
AK6-11	366.442	870.518	0.420947	0.055899	0.000883344	0.562238	0.0100032	0.0728984	0.000883774		455.6	35.1825	452.982	6.5089	453.594	5.31572
AK6-12	181.169	312.538	0.57967	0.0576365	0.00170839	0.57583	0.0138298	0.072796	0.000824441		516.705	69.435	461.778	8.91674	452.979	4.96009
AK6-13	332.458	587.723	0.565671	0.0573862	0.00097006	0.599383	0.0120628	0.0755597	0.000972946		505.595	32.405	476.842	7.66504	469.564	5.83691
AK6-14	377.711	707.941	0.533534	0.0568613	0.000833111	0.582991	0.0108703	0.0740098	0.000908411		487.08	31.4775	466.382	6.97975	460.268	5.45812
AK6-15	54.4492	109.741	0.49616	0.0582246	0.00211356	0.575002	0.0202456	0.071567	0.00083696		538.925	79.6175	461.244	13.0558	445.589	5.04079
AK6-16	1084.55	1227.69	0.883406	0.0562067	0.000764171	0.584709	0.0102619	0.0753104	0.000993311		461.155	34.255	467.483	6.58289	468.07	5.9602
AK6-17	144.914	182.376	0.794587	0.0577831	0.00156854	0.511174	0.0140358	0.064466	0.000811199		520.41	63.88	419.238	9.43522	402.729	4.91744
AK6-18	106.042	201.805	0.525469	0.0574777	0.00152415	0.570764	0.0157385	0.0724521	0.00110395		509.3	59.2525	458.508	10.1786	450.912	6.64024
AK6-19	114.128	256.872	0.4443	0.0581068	0.00134544	0.565306	0.0145728	0.070251	0.000826191		600.025	49.9925	454.974	9.45817	437.667	4.98198
AK6-20	109.782	251.974	0.435686	0.0573476	0.00124109	0.590074	0.0138779	0.0747178	0.00104129		505.595	46.2925	470.915	8.86788	464.517	6.25095
AK6-21	271.881	459.885	0.591192	0.0565848	0.00108229	0.582326	0.0135462	0.0741381	0.000910589		475.97	42.5875	465.955	8.69839	461.038	5.47055
AK6-22	116.168	201.549	0.576377	0.0566955	0.00134348	0.526759	0.0127988	0.0674276	0.000759554		479.67	51.8475	429.657	8.51694	420.639	4.59272
AK6-23	185.406	311.947	0.594353	0.0566902	0.00107876	0.598901	0.0137037	0.0761543	0.00093909		479.67	42.59	476.536	8.70855	473.127	5.63117
AK6-24	547.576	738.223	0.741749	0.0577961	0.0014805	0.569097	0.0125433	0.071743	0.000987928		520.41	55.55	457.431	8.12288	446.648	5.94717
AK6-25	378.964	569.698	0.665202	0.0569478	0.000943575	0.535129	0.00908124	0.0679736	0.000621668		500.04	35.18	435.208	6.01391	423.936	3.75944
AK6-26	520.262	738.831	0.704169	0.0582346	0.000910228	0.554914	0.00955966	0.0689516	0.000793177		538.925	33.33	448.211	6.25004	429.836	4.78895
AK6-27	284.44	449.937	0.632176	0.0560837	0.00101894	0.534477	0.0100812	0.0689722	0.000738796		457.45	40.7375	434.777	6.6774	429.96	4.46134
AK6-28	815.91	1132.79	0.720268	0.0567374	0.000934126	0.546738	0.0097858	0.069699	0.000799988		479.67	30.5525	442.858	6.43112	434.342	4.82674
AK6-29	303.596	625.226	0.485577	0.0575174	0.000938361	0.574218	0.0107048	0.0720551	0.000824473		522.26	35.18	460.739	6.91178	448.525	4.96358
AK6-30	109.874	197.682	0.555812	0.0592206	0.00149808	0.553445	0.0147691	0.0674803	0.000793184		575.96	53.6925	447.251	9.65834	420.957	4.79535
AK6-31	118.575	321.833	0.368436	0.0557483	0.00115296	0.564029	0.0119077	0.0733769	0.000834177		442.64	46.2925	454.146	7.73678	456.468	5.0159
AK6-32	334.032	564.51	0.591721	0.0581013	0.000972751	0.565834	0.010376	0.07057	0.00083742		600.025	35.18	455.317	6.73553	439.589	5.04809
AK6-33	552.678	791.68	0.698108	0.0553397	0.000856818	0.549519	0.0108905	0.0717265	0.00103492		433.38	35.1825	444.682	7.14285	446.549	6.2297
AK6-34	386.008	580.549	0.664902	0.0559539	0.000894092	0.583782	0.0111756	0.0753814	0.000983863		450.045	37.035	466.889	7.17187	468.496	5.90323
AK6-35	225.625	436.879	0.516448	0.0565266	0.0010309	0.507964	0.00993664	0.064883	0.000652322		472.265	45.365	417.079	6.69681	405.254	3.95498
AK6-36	97.2937	239.551	0.406151	0.0557204	0.00127885	0.563868	0.0136061	0.0733893	0.000935618		442.64	54.625	454.041	8.83951	456.543	5.62441
AK6-37	266.119	551.501	0.482535	0.0565611	0.000960672	0.56729	0.0107792	0.0725615	0.000891094		475.97	43.515	456.26	6.99031	451.57	5.36129
AK6-38	264.263	466.339	0.566675	0.0561313	0.000989144	0.549556	0.00997455	0.070913	0.000775355		457.45	38.885	444.706	6.54305	441.654	4.67338
AK6-39	154.619	334.995	0.461555	0.0560961	0.000980603	0.571917	0.0120565	0.0735815	0.00100214		457.45	38.885	459.253	7.79415	457.697	6.02252
AK6-40	225.95	474.146	0.476541	0.0579714	0.00106057	0.556862	0.0117601	0.0691918	0.000779052		527.815	40.735	449.482	7.67603	431.285	4.70286
AK6-41	135.417	315.692	0.428952	0.0592367	0.00164662	0.654651	0.0210305	0.0788604	0.00116608		575.96	56.47	511.337	12.9101	489.317	6.97257
AK6-42	349.778	552.237	0.633384	0.0574654	0.000888912	0.631295	0.011441	0.0792824	0.00097849		509.3	33.33	496.902	7.12934	491.838	5.85043
AK6-43	565.187	1152.12	0.490563	0.0557149	0.000822417	0.518384	0.0097087	0.0670542	0.000889676		442.64	31.4775	424.071	6.49886	418.384	5.37956
AK6-44	144.165	155.078	0.929628	0.0541529	0.00154205	0.417268	0.0126547	0.0557757	0.000724575		375.98	58.3275	354.096	9.06949	349.884	4.42819
AK6-45	823.948	1003.6	0.820996	0.0558583	0.000850849	0.571056	0.0105948	0.0736736	0.000955492		455.6	33.33	458.697	6.85459	458.25	5.74218
AK6-46	128.897	328.514	0.392365	0.0576235	0.00118163	0.571115	0.0118057	0.0717475	0.000807487		516.705	41.6625	458.735	7.63616	446.675	4.86291
AK6-47	159.99	301.698	0.530299	0.0586063	0.00131681	0.592607	0.0158128	0.0726254	0.000944056		553.74	54.62	472.531	10.0868	451.953	5.67896
AK6-48	235.019	441.961	0.531764	0.0575886	0.00101347	0.564549	0.0103801	0.0708871	0.000786723		522.26	38.885	454.483	6.74371	441.498	4.74183
AK6-49	441.549	1021.56	0.43223	0.0569941	0.000835705	0.574144	0.0119894	0.0725693	0.00116948		500.04	33.33	460.691	7.73999	451.616	7.0331
AK6-50	351.773	728.645	0.482777	0.0562182	0.000856821	0.588785	0.0107013	0.0756883	0.000980142		461.155	33.33	470.092	6.84659	470.335	5.87931
AK6-51	31.0006	99.0278	0.313049	0.0840649	0.00169244	2.44772	0.0525328	0.210802	0.00256038		1294.44	39.1975	1256.75	15.4949	1233.09	13.6479
AK6-52	99.5338	279.167	0.356539	0.0573408	0.00109581	0.570921	0.0127238	0.0717841	0.000967273		505.595	42.5875	458.61	8.2301	446.895	5.82282
AK6-53	260.931	463.176	0.563351	0.0564471	0.00101079	0.554498	0.0111501	0.0708681	0.000832905		477.82	38.885	447.939	7.28953	441.383	5.01959
AK6-54	101.883	183.478	0.555289	0.0576905	0.00138053	0.560802	0.0140472	0.0703056	0.000940494		516.705	51.845	452.048	9.14357	437.996	5.6695
AK6-55	213.835	488.942	0.437341	0.0562214	0.00100078	0.562066	0.0108273	0.0723239	0.000862701		461.155	40.735	452.87	7.04478	450.141	5.19193
AK6-56	156.754	269.505	0.581638	0.0562966	0.00126873	0.575087	0.0146303	0.0736998	0.00104013		464.86	54.625	461.299	9.4367	458.408	6.24977
AK6-57	122.469	217.092	0.564133	0.0564331	0.00138808	0.572637	0.0153695	0.0733486	0.000900843		477.82	55.55	459.719	9.92836	456.298	5.41597
AK6-58	380.032	857.009	0.44344	0.0579067	0.00095816	0.55867	0.0103755	0.0697079	0.000787006		527.815	30.5525	450.66	6.76595	434.396	4.74855
AK6-59	198.642	250.142	0.794117	0.0574122	0.00131835	0.578113	0.0146065	0.0724728	0.000891735		505.595	54.625	463.248	9.40331	451.036	5.36556
AK6-60	292.648	518.027	0.564927	0.0543936	0.000997375	0.396484	0.00777519	0.052797	0.000569358		387.09	40.7375	339.095	5.65804	331.671	3.49085
AK6-61	77.4243	75.1767	1.0299	0.0651957	0.00176297	1.10739	0.0306517	0.123645	0.00156742		788.89	56.32	756.917	14.7776	751.512	9.00152
AK6-62	153.775	197.834	0.777291	0.0574179	0.00180674	0.530957	0.0164647	0.067467	0.001012		509.3	70.365	432.444	10.9239	420.877	6.11568
AK6-63	346.9	720.335	0.481581	0.0559708	0.000911183	0.539571	0.0103442	0.0695723	0.000752643		450.045	37.035	438.142	6.82875	433.578	4.54229
AK6-64	99.8643	303.887	0.328623	0.056854	0.00114598	0.611609	0.0140466	0.0779324	0.000988001		487.08	46.2925	484.574	8.8561	483.769	5.91437
AK6-65	356.404	503.099	0.708417	0.0569997	0.000993978	0.56529	0.0109893	0.0718558	0.000842731		500.04	37.0325	454.964	7.13534	447.327	5.07415
AK6-66	113.247	120.607	0.93897	0.0801779	0.00174607	2.20817	0.0503868	0.201082	0.00284702		1266.66	38.4225	1183.63	15.9677	1181.13	15.2938
AK6-67	279.311	539.354	0.517862	0.0555317	0.000915946	0.556977	0.00998294	0.0726737	0.00079563		435.23	39.81	449.557	6.51755	452.244	4.78771
AK6-68	607.699	782.231	0.776879	0.056339	0.000875992	0.557766	0.0103452	0.0716305	0.00086535		464.86	33.33	450.071	6.75014	445.971	5.2111
AK6-69	167.947	401.511	0.418288	0.0550521	0.00104913	0.560761	0.0115189	0.0736387	0.000746498		413.01	42.5875	452.022	7.50017	458.041	4.48899
AK6-70	62.037	125.858	0.492911	0.0651922	0.00259225	1.19023	0.0372073	0.131205	0.00188684		788.89	83.325	796.069	17.2577	794.738	10.7611
AK6-71	83.6878	787.611	0.106255	0.0569759	0.000882037	0.582888	0.00999119	0.0740883	0.000850865		500.04	33.33	466.315	6.41694	460.739	5.11274
AK6-72	179.186	537.502	0.333367	0.0562857	0.00106987	0.608198	0.0139465	0.0779128	0.00101447		464.86	42.5875	482.423	8.81165	483.652	6.07261
AK6-73	99.566	207.264	0.480383	0.0546267	0.00145601	0.512821	0.0143119	0.068013	0.000834971		398.2	56.475	420.344	9.61018	424.174	5.045
AK6-74	173.066	300.007	0.576875	0.0552159	0.00110595	0.558323	0.0120865	0.0730345	0.000759308		420.42	44.44	450.434	7.88134	454.412	4.56825
AK6-75	181.187	246.496	0.735051	0.0559477	0.00130335	0.584915	0.0146009	0.0755638	0.000851114		450.045	51.845	467.615	9.35953	469.589	5.10747
AK6-77	187.48	357.57	0.524316	0.0538863	0.000927717	0.553623	0.0109977	0.0741922	0.000888708		364.87	38.885	447.368	7.19406	461.363	5.33911
AK6-78	59.5908	132.524	0.44966	0.0556496	0.00177686	0.445495	0.0143413	0.0582278	0.000911104		438.935	72.215	374.119	10.0772	364.839	5.55368
AK6-79	678.872	457.657	1.48336	0.0558294	0.000936153	0.549191	0.00987556	0.0711279	0.000817772		455.6	37.0325	444.466	6.47977	442.947	4.92744
AK6-80	238.172	270.802	0.879508	0.055463	0.00122006	0.543162	0.0118571	0.071086	0.00082342		431.53	45.365	440.508	7.8076	442.695	4.96158
AK6-81	228.609	436.061	0.52426	0.0573495	0.00106556	0.642589	0.0130731	0.0809135	0.000926811		505.595	40.735	503.908	8.08855	501.573	5.534
AK6-82	173.248	288.67	0.600158	0.0566644	0.00121994	0.562197	0.0137349	0.0715451	0.000892686		479.67	46.29	452.955	8.93259	445.458	5.37578
AK6-83	194.098	243.587	0.796836	0.0565257	0.00139613	0.551979	0.0130668	0.0710776	0.000828616		472.265	55.55	446.292	8.55435	442.645	4.99285
AK6-84	161.719	312.818	0.516974	0.057137	0.00111704	0.655803	0.0142518	0.0829328	0.00100555		498.19	42.5875	512.044	8.74651	513.604	5.99219
AK6-85	268.864	538.925	0.498888	0.0554146	0.000993786	0.511039	0.00965725	0.0667649	0.000725501		427.825	45.365	419.147	6.4957	416.635	4.38994
AK6-86	532.25	864.652	0.615566	0.0562793	0.000827195	0.552218	0.00983852	0.0708519	0.000841417		464.86	31.4775	446.448	6.44303	441.286	5.07085
AK6-87	269.747	456.249	0.591227	0.0548795	0.00112323	0.512262	0.0127619	0.0672109	0.000867696		405.605	46.2925	419.969	8.57354	419.33	5.24615
AK6-88	174.327	240.199	0.725762	0.0554243	0.00112369	0.580446	0.0119456	0.075861	0.00081692		427.825	44.44	464.748	7.68116	471.37	4.90149
AK6-89	175.811	403.797	0.435394	0.058726	0.00103578	0.583079	0.0111958	0.0718517	0.000837538		566.7	38.8825	466.438	7.18794	447.302	5.04298
AK6-90	176.327	401.559	0.439106	0.0577783	0.00114414	0.588364	0.0117763	0.0739293	0.000829162		520.41	44.44	469.822	7.53494	459.785	4.98335
AK6-91	59.4322	133.696	0.444531	0.0550103	0.00169079	0.444803	0.0143697	0.0583986	0.00085215		413.01	68.51	373.634	10.1019	365.879	5.19397
AK6-92	162.439	286.369	0.567236	0.0869481	0.0012577	2.64144	0.0397002	0.219834	0.00204938		1361.11	27.78	1312.26	11.106	1281	10.8523
AK6-93	227.651	281.187	0.809606	0.0643251	0.00179812	0.681382	0.0210997	0.0770523	0.00144746		753.71	54.625	527.609	12.7471	478.504	8.66727
AK6-94	454.764	743.482	0.611667	0.0576517	0.000897855	0.561603	0.00995275	0.0704136	0.000799755		516.705	33.33	452.569	6.47878	438.647	4.82223
AK6-95	162.578	597.672	0.272018	0.0592514	0.00100382	0.585135	0.0119615	0.0713031	0.000884671		575.96	37.0275	467.756	7.66874	444.002	5.32878
AK6-97	77.5381	144.234	0.537584	0.058842	0.00150668	0.598572	0.0157279	0.0740795	0.000996585		561.145	55.545	476.327	9.99534	460.687	5.98648
AK6-98	173.226	429.638	0.40319	0.0567902	0.00107617	0.574573	0.0127161	0.0730928	0.000938685		483.375	40.735	460.968	8.20611	454.762	5.64433
AK6-99	320.57	644.599	0.497316	0.0562922	0.000969136	0.533183	0.0100728	0.0684554	0.000799832		464.86	34.255	433.92	6.67748	426.843	4.8312
AK6-100	208.551	772.21	0.27007	0.0573257	0.00100634	0.55752	0.0107109	0.0701225	0.000740212		505.595	38.885	449.911	6.98939	436.894	4.46527
AK6-101	112.193	212.985	0.526763	0.0541099	0.00114263	0.550423	0.0125552	0.0735818	0.000780414		375.98	52.7725	445.274	8.2281	457.699	4.69258
AK6-102	48.8155	96.8148	0.504215	0.0556684	0.00179127	0.531082	0.0174953	0.0693409	0.000859216		438.935	72.215	432.527	11.6062	432.183	5.18495
AK6-103	177.796	420.538	0.422782	0.0559151	0.000867764	0.573231	0.0105111	0.074047	0.00080394		450.045	35.1825	460.102	6.79119	460.492	4.83164
AK6-104	534.89	864.083	0.619027	0.0544056	0.000707525	0.536217	0.00827921	0.071278	0.000785237		387.09	24.9975	435.927	5.48028	443.851	4.73124
AK6-105	362.729	671.661	0.540048	0.0554047	0.000987758	0.543378	0.00893118	0.0710011	0.00073719		427.825	45.365	440.649	5.88343	442.184	4.44361
AK6-106	141.45	365.737	0.386754	0.0556426	0.00100282	0.568178	0.0108662	0.073852	0.000750622		438.935	38.885	456.836	7.04261	459.321	4.51286
AK6-107	463.197	905.04	0.511797	0.0558566	0.000772546	0.58612	0.0094043	0.0757457	0.000796586		455.6	29.6275	468.387	6.02875	470.679	4.78031
AK6-108	106.298	162.574	0.653847	0.0537382	0.00119624	0.579886	0.0128646	0.0783771	0.000907302		361.165	49.995	464.388	8.27406	486.429	5.4301
AK6-109	1055.71	1510.74	0.698806	0.0551965	0.000766707	0.526618	0.00802285	0.0688431	0.000678653		420.42	31.4775	429.562	5.34414	429.182	4.09965
AK6-110	157.781	224.04	0.704254	0.0567203	0.00137287	0.579059	0.0149829	0.0736029	0.000819455		479.67	49.07	463.856	9.63962	457.825	4.9266
AK6-111	111.241	155.3	0.716301	0.0740346	0.00119799	1.89562	0.0330217	0.185012	0.00190679		1042.6	33.335	1079.56	11.6027	1094.3	10.3897
AK6-112	701.877	620.711	1.13076	0.0561006	0.00087682	0.600751	0.0110807	0.0772518	0.000904139		457.45	39.81	477.71	7.03614	479.698	5.41668
AK6-113	81.9172	136.404	0.60055	0.0538197	0.00158401	0.421886	0.0134874	0.0564308	0.000656542		364.87	66.66	357.399	9.63455	353.882	4.01082
AK6-114	151.651	248.559	0.61012	0.0546184	0.00110241	0.555403	0.0120973	0.0732559	0.000626956		398.2	46.2925	448.53	7.90315	455.742	3.77379
AK6-115	173.737	272.837	0.63678	0.0556951	0.00102653	0.581625	0.011759	0.0753346	0.000718048		438.935	40.735	465.506	7.55577	468.215	4.31197
AK6-116	193.531	410.505	0.471447	0.0521745	0.000870731	0.435638	0.00851438	0.0604402	0.000790938		300.06	38.885	367.172	6.02713	378.302	4.81245
AK6-117	512.038	297.552	1.72083	0.0551434	0.001133	0.512572	0.0109206	0.0673338	0.000692607		416.715	46.2925	420.177	7.33651	420.072	4.18931
AK6-118	121.4	236.162	0.514053	0.0553508	0.0012184	0.594662	0.0141094	0.0776232	0.000796683		427.825	49.995	473.84	8.98977	481.92	4.77291
AK6-119	107.379	378.246	0.283886	0.0707103	0.00101815	1.51545	0.0245598	0.154923	0.00152841		949.995	34.26	936.641	9.93424	928.502	8.54584
AK6-120	86.2768	171.874	0.501978	0.0573198	0.0014348	0.55955	0.0129736	0.0709263	0.000792456		505.595	55.55	451.234	8.45232	441.734	4.77613
AK6-121	183.057	252.248	0.725701	0.0568784	0.00116818	0.572415	0.0127799	0.0728027	0.000779589		487.08	44.44	459.575	8.25852	453.019	4.69089
AK6-122	226.938	252.161	0.899973	0.0601589	0.00156464	0.5822	0.01449	0.0700079	0.00068553		609.28	55.545	465.874	9.30443	436.203	4.13678
AK6-123	145.212	265.526	0.546885	0.0654063	0.00101165	1.22346	0.0193163	0.135535	0.00124162		787.04	33.33	811.358	8.83837	819.366	7.06251
AK6-124	223.744	423.816	0.527926	0.0557867	0.000930856	0.516267	0.00898956	0.067079	0.000667354		442.64	37.0325	422.655	6.0268	418.534	4.03793
AK6-125	149.302	335.867	0.444526	0.054637	0.00109082	0.542175	0.0113763	0.0719358	0.0007626		398.2	44.44	439.857	7.49622	447.808	4.5925
AK6-126	264.774	213.751	1.2387	0.0531736	0.0010923	0.501774	0.0103579	0.0685444	0.000742746		344.5	41.6625	412.902	7.00883	427.38	4.48684
AK6-127	270.5	469.282	0.576413	0.0558358	0.000995187	0.550474	0.010876	0.0712069	0.000730392		455.6	38.885	445.307	7.12896	443.423	4.40194
AK6-128	210.165	584.588	0.35951	0.0553741	0.000860561	0.562528	0.0091946	0.0733553	0.000613562		427.825	35.1825	453.17	5.9829	456.339	3.69319
AK6-129	170.806	348.205	0.490532	0.0562838	0.00102422	0.573652	0.0110139	0.0736928	0.000712853		464.86	34.255	460.374	7.11352	458.365	4.2871
AK6-130	242.6	333.47	0.727502	0.0560037	0.00110588	0.431905	0.00895847	0.0557522	0.000529001		453.75	42.5875	364.528	6.35741	349.741	3.23559
AK6-131	68.7352	183.878	0.37381	0.0553257	0.00138984	0.597402	0.016048	0.0782289	0.00100406		433.38	55.55	475.584	10.206	485.543	6.00868
AK6-132	73.2599	141.495	0.517757	0.0547156	0.00165889	0.560131	0.0167496	0.0746746	0.000946378		466.71	73.14	451.612	10.9055	464.258	5.68236
AK6-133	116.669	234.985	0.496497	0.055941	0.0010714	0.551931	0.0117249	0.0712153	0.000689866		450.045	47.2175	446.261	7.67725	443.474	4.15841
AK6-134	301.293	441.221	0.682863	0.0553069	0.000953698	0.545499	0.00999449	0.0714628	0.000768961		433.38	37.0325	442.044	6.5732	444.963	4.63266
AK6-135	369.848	618.086	0.598376	0.0582279	0.000959123	0.568488	0.00971385	0.0706306	0.000671806		538.925	35.1825	457.036	6.29607	439.953	4.05201
AK6-136	242.247	349.027	0.694064	0.0588185	0.00106483	0.625328	0.0118201	0.0770264	0.000870248		561.145	38.88	493.181	7.39191	478.349	5.21517
AK6-137	191.773	224.737	0.853321	0.0554336	0.00112587	0.53862	0.0114702	0.0703225	0.000713561		431.53	46.2925	437.514	7.5754	438.098	4.30419
AK6-138	174.348	398.107	0.437943	0.0549875	0.00103223	0.567005	0.0112959	0.0745638	0.000727117		413.01	42.59	456.076	7.32607	463.592	4.36922
AK6-139	383.899	648.823	0.591686	0.0544356	0.000780028	0.552801	0.00911586	0.0734111	0.000766533		390.79	26.85	446.83	5.96863	456.674	4.61005
AK6-140	435.37	836.757	0.520306	0.0551393	0.000756515	0.54592	0.00890037	0.0717072	0.000840519		416.715	34.255	442.321	5.85363	446.433	5.06154
AK6-141	315.434	862.587	0.365684	0.0561731	0.000766711	0.551065	0.00844117	0.0710041	0.000714854		457.45	36.1075	445.694	5.5342	442.202	4.30935
AK6-142	210.887	283.762	0.743183	0.0555205	0.00109163	0.560059	0.0121965	0.0729005	0.00073299		431.53	44.44	451.565	7.94418	453.607	4.4109
AK6-143	195.512	380.785	0.513443	0.0564888	0.00103234	0.568133	0.0104026	0.0727783	0.000739574		472.265	45.365	456.806	6.74296	452.872	4.45089
AK6-144	154.844	362.323	0.427364	0.0552364	0.000970981	0.545162	0.0100995	0.0715275	0.000694461		420.42	38.885	441.822	6.64356	445.352	4.18486
AK6-145	100.355	198.104	0.506577	0.0556759	0.00130334	0.566961	0.0138931	0.0739997	0.000819879		438.935	56.475	456.047	9.00803	460.207	4.92739
AK6-146	35.3897	62.6296	0.565063	0.0567202	0.00276224	0.551977	0.0237084	0.0723538	0.00115812		479.67	107.395	446.291	15.5142	450.321	6.96624
AK6-147	126.871	356.101	0.356279	0.0690912	0.00103406	1.3868	0.0236861	0.145131	0.00144336		901.85	30.715	883.338	10.0943	873.611	8.13897
AK6-148	104.533	130.855	0.798847	0.0552949	0.00157857	0.542472	0.015361	0.0713273	0.000806346		433.38	60.18	440.053	10.1163	444.147	4.85789
AK6-149	160.188	375.74	0.426328	0.0560221	0.00104771	0.558469	0.0112756	0.0720838	0.000735289		453.75	40.7375	450.529	7.35273	448.698	4.42791
AK6-150	282.352	540.843	0.522059	0.0550257	0.00083947	0.550849	0.00944721	0.0724104	0.000799282		413.01	33.33	445.553	6.19276	450.661	4.81076
AK6-151	172.628	346.654	0.497984	0.0557553	0.00109342	0.561922	0.0119875	0.073016	0.00084155		442.64	44.44	452.776	7.79897	454.3	5.06177
AK6-152	354.569	694.923	0.510228	0.0555176	0.000876679	0.56117	0.0101892	0.0729632	0.000819617		431.53	39.81	452.288	6.63416	453.983	4.9304
AK6-153	385.354	659.773	0.584071	0.0556666	0.000891373	0.579169	0.0100823	0.075072	0.000761094		438.935	4.63	463.927	6.49044	466.641	4.57067
AK6-154	147.743	458.617	0.322148	0.0554348	0.000988752	0.560533	0.0108252	0.0728362	0.000721042		431.53	43.515	451.873	7.05026	453.22	4.33947
AK6-155	328.87	404.021	0.813993	0.0560424	0.0011344	0.516697	0.0111154	0.0663911	0.000670454		453.75	44.44	422.943	7.44699	414.377	4.05912
AK6-156	151.218	330.882	0.457016	0.0559761	0.00115556	0.601077	0.0125782	0.0777152	0.000883385		450.045	46.2925	477.917	7.98357	482.47	5.29044
AK6-157	303.857	704.673	0.431203	0.0542592	0.000831406	0.588244	0.00974221	0.0782377	0.00078057		388.94	35.1825	469.746	6.23649	485.595	4.67412
AK6-158	126.351	285.703	0.442246	0.0571973	0.0012943	0.56431	0.0124857	0.071583	0.000700913		498.19	49.995	454.328	8.11029	445.686	4.22341
AK6-159	327.865	591.907	0.553913	0.0552023	0.000859771	0.547339	0.0096102	0.0714418	0.000693552		420.42	33.33	443.252	6.31353	444.836	4.17972
AK6-160	590.091	718.333	0.821473	0.0544922	0.000839202	0.527186	0.00928332	0.0700121	0.000874126		390.79	33.33	429.94	6.17914	436.229	5.27154
AK6-161	104.136	288.973	0.360367	0.0556326	0.00110794	0.55084	0.0115086	0.0716224	0.000789799		438.935	42.5875	445.547	7.54116	445.923	4.75718
AK6-162	120.128	203.544	0.590183	0.0576337	0.00152588	0.580624	0.015616	0.0729992	0.000858037		516.705	57.4025	464.862	10.0366	454.2	5.16079
AK6-163	84.6113	193.911	0.43634	0.0550063	0.00124334	0.560459	0.0146309	0.0733994	0.000959062		413.01	49.995	451.825	9.52522	456.604	5.76502
AK6-164	140.733	241.094	0.583726	0.0558622	0.00124593	0.558666	0.0132062	0.0722174	0.000775253		455.6	48.1425	450.658	8.60853	449.501	4.66731
AK6-165	233.684	435.084	0.537102	0.0549927	0.000981457	0.536157	0.0101559	0.0705307	0.000732312		413.01	38.885	435.887	6.71949	439.352	4.41614
AK6-166	649.788	987.56	0.657974	0.0558747	0.000780554	0.545807	0.00921445	0.0705892	0.00079193		455.6	31.4775	442.246	6.06009	439.704	4.77441
AK6-167	291.033	581.837	0.500197	0.0552925	0.000905379	0.542359	0.0100297	0.0708926	0.000719132		433.38	37.0325	439.979	6.60961	441.531	4.3355
AK6-168	377.747	546.395	0.691344	0.0567678	0.00092273	0.545472	0.00981092	0.0694331	0.000634379		483.375	30.5525	442.026	6.45283	432.739	3.83109
AK6-169	94.8323	209.155	0.453407	0.0568391	0.00145154	0.583368	0.0140968	0.0741474	0.00077081		487.08	55.55	466.624	9.04559	461.094	4.63265
AK6-170	151.263	296.347	0.510427	0.0567467	0.0010221	0.596331	0.0117983	0.0761044	0.000795121		483.375	38.885	474.903	7.51153	472.828	4.77002
AK6-171	180.887	356.98	0.506714	0.0568421	0.00139087	0.558397	0.0144246	0.0713381	0.000802908		487.08	53.6975	450.482	9.40344	444.212	4.83718
AK6-172	485.926	871.876	0.557333	0.0564964	0.000849926	0.571249	0.0098149	0.0731978	0.000752056		472.265	33.33	458.822	6.35032	455.393	4.52409
AK6-173	535.993	913.964	0.586448	0.0571752	0.000795794	0.57913	0.00991608	0.0733195	0.000839418		498.19	24.9975	463.902	6.38385	456.123	5.0476
AK6-174	209.339	526.804	0.397375	0.0564007	0.000861148	0.564357	0.00924808	0.07263	0.000736829		477.82	33.33	454.359	6.01063	451.981	4.435
AK6-175	140.87	203.677	0.691631	0.0548922	0.00117981	0.522955	0.012138	0.0689924	0.000729058		409.31	43.515	427.124	8.09785	430.083	4.40262
AK6-176	124.321	280.912	0.442565	0.0571236	0.00116619	0.58179	0.0124066	0.0740945	0.000856963		494.485	44.44	465.611	7.97037	460.777	5.14927
AK6-177	250.354	557.441	0.449113	0.0559771	0.000869098	0.567534	0.00997845	0.073537	0.00083485		450.045	35.1825	456.418	6.47107	457.43	5.01922
AK6-178	39.8692	52.2714	0.762735	0.0593408	0.0026403	0.58522	0.0249078	0.0719131	0.0010004		588.915	96.2825	467.811	15.9574	447.671	6.02117
AK6-179	191.259	351.179	0.544619	0.0560009	0.000925261	0.557475	0.00968632	0.0721113	0.000658321		453.75	35.1825	449.882	6.32232	448.863	3.96578
AK6-180	189.499	239.429	0.791461	0.0552781	0.00108855	0.562494	0.0120864	0.0737004	0.000785797		433.38	44.44	453.148	7.86037	458.411	4.72435
AK6-181	582.779	1029.72	0.565959	0.0552308	0.000731696	0.55044	0.00839581	0.0721117	0.000728542		420.42	29.6275	445.285	5.50674	448.865	4.38729
AK6-182	199.631	513.992	0.388393	0.055013	0.000905905	0.558769	0.0101302	0.0734005	0.000677276		413.01	37.0325	450.725	6.60591	456.61	4.07491
AK6-183	145.575	216.062	0.673764	0.0557732	0.00125614	0.593928	0.0140444	0.0771581	0.000853004		442.64	54.625	473.373	8.95255	479.137	5.11148
AK6-184	251.571	509.136	0.494115	0.0571689	0.00102185	0.54825	0.0106841	0.0692913	0.000743593		498.19	71.2875	443.849	7.01344	431.884	4.48894
AK6-185	130.137	319.327	0.407534	0.0566672	0.00102763	0.578325	0.0121923	0.073671	0.000804243		479.67	38.885	463.384	7.85001	458.235	4.83508
AK6-186	340.021	777.509	0.437322	0.0580912	0.00105187	0.574731	0.0100286	0.0715545	0.000569726		531.52	38.885	461.07	6.47399	445.514	3.43587
AK6-187	130.254	305.612	0.426205	0.0553755	0.00102608	0.554907	0.0115397	0.0722717	0.000739539		427.825	45.365	448.206	7.54182	449.827	4.45268
AK6-188	122.639	262.254	0.467636	0.055275	0.00117924	0.538213	0.011798	0.0704746	0.000705486		433.38	50.92	437.246	7.79361	439.014	4.25506
AK6-189	357.178	431.67	0.827433	0.0554382	0.000919699	0.544934	0.0098386	0.0711376	0.000853532		431.53	37.035	441.673	6.47323	443.006	5.14237
AK6-190	574.553	844.739	0.680154	0.0565807	0.000779827	0.585108	0.00959403	0.0746628	0.000915173		475.97	31.4775	467.739	6.15394	464.187	5.49542
AK6-191	88.9332	206.765	0.430118	0.055042	0.00150455	0.534092	0.0125703	0.0703665	0.000765605		413.01	61.105	434.522	8.32523	438.363	4.61702
AK6-192	134.43	372.461	0.360925	0.0561365	0.00110305	0.552251	0.0116115	0.0709569	0.000778918		457.45	44.44	446.47	7.60157	441.918	4.69462
