# Supplementary material
Source: publisher figshare collection journal article supplement (https://gsapubs.figshare.com/articles/dataset/_/19765762)
Supplement: Supplementary file 1 [file 1]

Limin Gao, Wenjiao Xiao, Zhou Tan, Xinshui Wang, and Yuhong Guo, 2022, A newly defined, long-lived Paleozoic intra-oceanic arc in the South Tianshan (NW China): Implications for multiple accretionary tectonics in the southern Altaids: GSA Bulletin, <https://doi.org/10.1130/B36355.1>.

## Supplemental Material

**Table S1.** LA-ICP-MS Zircon U-Pb age of the Akeyazi HABs, calc-alkaline granitoids, and Akeyazi sandstones.

**Table S2.** SIMS zircon U-Pb isotopic data of the Akeyazi HABs and calc-alkaline granitoids.

**Table S3.** Bulk rock geochemistry, Sr-Nd isotopic data, zircon U-Pb age and zircon Hf isotope of regional intermediate-basic rocks.

**Table S4.** Compilation of detrital zircon U-Pb ages from the (meta-) sedimentary rocks from Yili Basin, Central Tianshan Block, South Tianshan Accretionary Complex and the northern Tarim Craton.

**Table S2. SIMS zircon U-Pb isotopic data of the Akeyazi HABs and calc-alkaline granitoids**

| No.                  | U<br>( $\mu\text{g/g}$ ) | Th<br>( $\mu\text{g/g}$ ) | Th/U | $f_{206}$ (%) | $\frac{^{207}\text{Pb}}{^{235}\text{U}}$ | $\pm 1\text{s}$<br>% | $\frac{^{206}\text{Pb}}{^{238}\text{U}}$ | $\pm 1\text{s}$<br>% | r    | $\frac{^{207}\text{Pb}}{^{235}\text{U}}$ | $\pm 1\text{s}$ | $\frac{^{206}\text{Pb}}{^{238}\text{U}}$ | $\pm 1\text{s}$ |
|----------------------|--------------------------|---------------------------|------|---------------|------------------------------------------|----------------------|------------------------------------------|----------------------|------|------------------------------------------|-----------------|------------------------------------------|-----------------|
| <i>AK36-1 (n=9)</i>  |                          |                           |      |               |                                          |                      |                                          |                      |      |                                          |                 |                                          |                 |
| AK36-1@2             | 835.91                   | 1423.40                   | 1.70 | 0.1           | 0.496007                                 | 1.88                 | 0.065689                                 | 1.54                 | 0.82 | 409.00                                   | 6.33            | 410.13                                   | 6.14            |
| AK36-1@12            | 386.25                   | 154.18                    | 0.40 | 0.21          | 0.494284                                 | 2.45                 | 0.065944                                 | 1.50                 | 0.61 | 407.83                                   | 8.26            | 411.67                                   | 5.99            |
| AK36-1@10            | 711.10                   | 552.38                    | 0.78 | 0.21          | 0.491265                                 | 1.83                 | 0.066122                                 | 1.50                 | 0.82 | 405.77                                   | 6.13            | 412.75                                   | 6.01            |
| AK36-1@4             | 1084.48                  | 550.89                    | 0.51 | 0.23          | 0.496414                                 | 1.85                 | 0.066242                                 | 1.53                 | 0.83 | 409.27                                   | 6.26            | 413.47                                   | 6.13            |
| AK36-1@8             | 532.42                   | 174.79                    | 0.33 | 0.18          | 0.499514                                 | 1.92                 | 0.066317                                 | 1.50                 | 0.78 | 411.37                                   | 6.52            | 413.93                                   | 6.03            |
| AK36-1@1             | 170.38                   | 480.48                    | 2.82 | 0.28          | 0.496741                                 | 3.02                 | 0.066446                                 | 1.50                 | 0.50 | 409.49                                   | 10.22           | 414.71                                   | 6.04            |
| AK36-1@9             | 2009.83                  | 631.24                    | 0.31 | 0.06          | 0.506278                                 | 1.64                 | 0.067008                                 | 1.51                 | 0.92 | 415.94                                   | 5.62            | 418.10                                   | 6.10            |
| AK36-1@14            | 2404.52                  | 611.08                    | 0.25 | 0.03          | 0.509508                                 | 1.60                 | 0.067282                                 | 1.51                 | 0.94 | 418.12                                   | 5.52            | 419.76                                   | 6.12            |
| AK36-1@5             | 5641.26                  | 1973.52                   | 0.35 | 0.03          | 0.532781                                 | 1.54                 | 0.070155                                 | 1.50                 | 0.97 | 433.65                                   | 5.46            | 437.09                                   | 6.35            |
| <i>AK34-7 (n=15)</i> |                          |                           |      |               |                                          |                      |                                          |                      |      |                                          |                 |                                          |                 |
| AK34-7@03            | 999.09                   | 555.56                    | 0.56 | 0.04          | 0.564178                                 | 1.70                 | 0.072874                                 | 1.50                 | 0.88 | 454.24                                   | 6.26            | 453.45                                   | 6.57            |
| AK34-7@04            | 304.52                   | 143.98                    | 0.47 | 0.19          | 0.554760                                 | 2.48                 | 0.072813                                 | 1.51                 | 0.61 | 448.11                                   | 9.03            | 453.08                                   | 6.59            |
| AK34-7@05            | 2022.55                  | 59.77                     | 0.03 | 0.02          | 0.523875                                 | 1.62                 | 0.068137                                 | 1.50                 | 0.93 | 427.74                                   | 5.67            | 424.92                                   | 6.17            |
| AK34-7@06            | 487.07                   | 178.68                    | 0.37 | 0.1           | 0.551744                                 | 2.02                 | 0.071247                                 | 1.50                 | 0.74 | 446.14                                   | 7.34            | 443.66                                   | 6.44            |
| AK34-7@07            | 243.57                   | 113.07                    | 0.46 | 0.15          | 0.552992                                 | 2.50                 | 0.071770                                 | 1.52                 | 0.61 | 446.95                                   | 9.06            | 446.81                                   | 6.57            |
| AK34-7@08            | 516.40                   | 207.29                    | 0.40 | 0.07          | 0.544268                                 | 2.15                 | 0.071265                                 | 1.50                 | 0.70 | 441.23                                   | 7.71            | 443.77                                   | 6.44            |
| AK34-7@1             | 377.99                   | 188.12                    | 0.50 | 0.04          | 0.581388                                 | 2.21                 | 0.074410                                 | 1.50                 | 0.68 | 465.35                                   | 8.29            | 462.67                                   | 6.72            |
| AK34-7@10            | 455.40                   | 283.65                    | 0.62 | 0.13          | 0.531849                                 | 2.38                 | 0.069316                                 | 1.95                 | 0.82 | 433.04                                   | 8.43            | 432.03                                   | 8.17            |
| AK34-7@11            | 404.83                   | 216.67                    | 0.54 | 0.06          | 0.565527                                 | 1.97                 | 0.073046                                 | 1.51                 | 0.76 | 455.12                                   | 7.27            | 454.48                                   | 6.63            |
| AK34-7@12            | 311.90                   | 124.29                    | 0.40 | 0.27          | 0.540806                                 | 2.38                 | 0.070864                                 | 1.50                 | 0.63 | 438.96                                   | 8.53            | 441.36                                   | 6.41            |
| AK34-7@13            | 374.68                   | 221.04                    | 0.59 | 0.06          | 0.558350                                 | 2.44                 | 0.072177                                 | 1.66                 | 0.68 | 450.45                                   | 8.90            | 449.26                                   | 7.22            |
| AK34-7@14            | 569.82                   | 221.82                    | 0.39 | 0.05          | 0.550355                                 | 1.85                 | 0.072270                                 | 1.50                 | 0.81 | 445.23                                   | 6.71            | 449.82                                   | 6.53            |
| AK34-7@15            | 1092.50                  | 248.04                    | 0.23 | 0.01          | 0.542678                                 | 1.82                 | 0.070369                                 | 1.50                 | 0.83 | 440.19                                   | 6.52            | 438.38                                   | 6.36            |
| AK34-7@17            | 486.79                   | 184.46                    | 0.38 | 0.13          | 0.533192                                 | 2.05                 | 0.070585                                 | 1.50                 | 0.73 | 433.93                                   | 7.27            | 439.68                                   | 6.39            |
| AK34-7@18            | 322.92                   | 143.42                    | 0.44 | 1.03          | 0.555002                                 | 3.24                 | 0.072095                                 | 1.54                 | 0.47 | 448.27                                   | 11.81           | 448.76                                   | 6.66            |



|  |   |
|--|---|
|  | N |
|  | K |
|  | K |
|  | K |
|  | K |



Gou, L.L., Zhang, L.F., Tao, R.H., Du, J.X., 2012. A geochemical study of rhyolite and post-orifissional granitoids at Muladuete River in the Southwest Tianshan UHP belt, NW China. *Lithos* 136–139, 201–224. <https://doi.org/10.1016/j.lithos.2011.10.005>

Huo, Y., Zhao, G., Carverol, P.A., Sun, M., Liu, Q., Yao, J., 2019. Plume-modified collision orogeny: The Tarim-western Tianshan example in Central Asia. *Geology* 47, 1091–1095. <https://doi.org/10.1306/0405.19>

He, P.-L., Huang, X.L., Xu, Y.G., Li, H.Y., Wang, X., Li, W.X., 2016. Plume-orogenic lithosphere interaction recorded in the Halauda layered intrusion in the Southwest Tianshan Orogen, NW China. *J. Geophys. Res.* Solid Earth 121, 1525–1545. <https://doi.org/10.1002/2015JB012652>

Huang, H., Zhang, Z., Kadiy, T., Santosh, M., Zhang, S., Zhang, D., 2012a. Lithic Continental vertical growth in the transitional area between South Tianshan and Tarim , western Xinjiang , NW China : Insight from the Permian Halajan A1-type granite magmatism. *LITHOS* 155, 49–66. <https://doi.org/10.1016/j.lithos.2012.08.014>

Huang, H., Zhang, Z., Santosh, M., Zhang, D., 2014. Geochemistry, geochronology and metallogenic implications of the Baotegai or rare metal-bearing perthite-rich granite intrusion in South Tianshan, NW China. *One Geol. Rev.* 41, 157–174. <https://doi.org/10.1016/j.onegeo.2014.01.001>

Huang, H., Zhang, Z., Santosh, M., Zhang, D., Wang, T., 2015. Petrogenesis of the early Permian volcanic rocks in the Chinese South Tianshan: Implications for crustal growth in the central Asian Orogenic Belt. *Lithos* 228–229, 21–42. <https://doi.org/10.1016/j.lithos.2015.04.017>

Huang, H., Zhang, Z., Santosh, M., Zhang, D., Zhao, Z., Liu, J., 2013. Early Paleozoic tectonic evolution of the South Tianshan collisional belt: Evidence from geochronology and zircon U-Pb isotopic composition of the 60-Ma monzonite pluton, Northwest China. *J. Geol.* 121, 401–421. <https://doi.org/10.1086/678053>

Konopelko, D., Beka, G., Schumme, R., Elshard, O., Belyuksky, B., 2007. Hercynian post-orifissional A-type granites of the Kokshat Range, Southern Tien Shan, Kyrgyzstan. *Lithos* 97, 140–160. <https://doi.org/10.1016/j.lithos.2006.12.005>

Konopelko, D., Schumme, R., Manjunagar, V., Zaman, R.E., Rojas-Aguirre, Y., Affre, T., Palay, D., Niyozov, A., 2017. A geochronology across two paleo-subduction arcs in Tien Shan, Tajikistan. *Gondwana Res.* 47, 110–130. <https://doi.org/10.1016/j.gr.2016.09.010>

Kobur, A., Alexey, D. V., Hignut, C., Rojas-Aguirre, Y., Corinti, M., Chen, Y., Windley, B. F., Li, D., Tretliayev, A. A., 2012. Zircon and monzonite ages, geochronology, and Nd-Hf isotopes for the Alayev metamorphic terrane: Evidence for an Early Ordovician collisional belt in the northern Tianshan of Kyrgyzstan. *Gondwana Res.* 21, 901–927. <https://doi.org/10.1016/j.gr.2011.05.010>

Li, N., Niu, H., Shan, Q., Yang, W., 2015. Two episodes of Late Paleozoic A-type magmatism in the Qungay area , western Tianshan : Petrogenesis and tectonic implications. *Junggar Block et Yili - C enter a Bbo J. Asian Earth Sci.* 113, 238–253. <https://doi.org/10.1016/j.jasce.2014.12.015>

Li, N.B., Niu, H.C., Zhang, X.C., Qian, Q.X., Liu, Q., Li, C.Y., Yan, S., Yang, W. Bo, 2015. Age, petrogenesis and tectonic significance of the Keshubashan in the Changmuqian rare deposit, western Tianshan. *Int. Geol. Rev.* 57, 1218–1238. <https://doi.org/10.1080/00207179.2015.1004136>

Li, Y. Q., Li, Z. L., Sun, Y. L., Santosh, M., Langmuir, C.H., Chen, H.L., Yang, S.F., Chen, Z.X., Yu, X., 2012. Platinum-group elements and geochemical characteristics of the Permian continental flood basalts in the Tarim Basin, northwest China: Implications for the evolution of the Tarim Large Igneous Province. *Chem. Geol.* 328, 278–299. <https://doi.org/10.1016/j.chemgeo.2012.03.007>

Liu, L., Qian, Q., Wang, Y., Guo, J., Jiang, T., Liu, X., 2015. Gabbroic pluton in the Halaqinshan Formation volcanic rocks from Northern Zhams, Western Tianshan: Age, geochronology and geological implications. *Acta Petrol. Sin.* 31, 1749–1760.

Liu, D., Guo, Z., Jidovet, M., Cheng, F., Song, Y., Zhang, Z., 2014. Petrology and geochemistry of Early Permian volcanic rocks in South Tien Shan, NW China: implications for the tectonic evolution and Phanerozoic continental growth. *Int. J. Earth Sci.* 103, 737–756. <https://doi.org/10.1007/s00531-013-0994-1>

Liu, H.Q., Xu, Y.G., Tian, W., Zhang, Y.T., Mandil, R., Li, X.H., Yang, Y.H., Luo, Z.Y., Shang-Guan, S.M., 2014. Origin of two types of rhyolites in the Tarim Large Igneous Province: Consequences of incubation and melting of a mantle plume. *Lithos* 204, 99–72. <https://doi.org/10.1016/j.lithos.2014.02.007>

Liu, Y., Niu, H., Shan, Q., Yang, W., Zhang, H., Zhou, C., Liu, S., Yu, X., 2010. Geochemical characteristics and petrogenesis of the Akbulakshan Permian diorite in the western Tianshan. *Acta Petrol. Sin.* 26, 2925–2934.

Ma, Y., Zhang, Z., Huang, H., Santosh, M., Cheng, Z., 2016. Petrogenesis of the Baishanqiang bimodal igneous complex in northwest Tianshan Mountains, China: Implications for the Tarim Large Igneous Province. *Lithos* 264, 509–523. <https://doi.org/10.1016/j.lithos.2016.08.010>

Ma, C., Xia, L., Suo, X., Xu, Z., Li, X., Wang, L., 2008. Geochemical characteristics and petrogenesis of the Early Paleozoic igneous rocks from Bayindilake, Southern Tianshan. *Acta Petrol. Mineral.* 28, 2299–2300.

Niu, H., Shang, Q., Luo, Y., Yang, W., Zhou, C., Liu, S., Yu, X., 2010. Geochemical and geochemical studies on quartz diorite in Yezhaomogai Daban, West Tianshan and its tectonic implication. *Acta Petrol. Sin.* 26, 2935–2945.

Qian, Q., Cao, J., Klamt, R., He, G., Song, B., Liu, D., Xu, R., 2009. Early Paleozoic tectonic evolution of the Chinese South Tianshan Orogen: Constraints from SHRIMP zircon U-Pb geochronology and geochemistry of basaltic and dioritic rocks from Xiatai, NW China. *Int. J. Earth Sci.* 98, 551–569. <https://doi.org/10.1007/s00531-007-0208-x>

Qian, Q., Cao, J., Xiang, X., Huang, D., 2008. Petrogenesis and tectonic settings of Carboniferous volcanic rocks from north Zhamsi, western Tianshan Mountains: constraints from petrology and geochemistry. *Acta Petrol. Sin.* 22, 1307–1323.

Shangguan, S., Patti, L.U., Tian, W., Xu, Y., 2016. Re-evaluating the geochronology of the Permian Tarim magmatic province: Implications for temporal evolution of magmatism. *J. Geol. Soc. London* 173, 228–239. <https://doi.org/10.1144/jgs2014-114>

Shi, Y., Liu, D., Zhang, Q., Jin, P., Zhang, F., Xiao, L., 2007. SHRIMP zircon U-Pb dating of the Gunguo granulites, Central Tianshan Mountains, Northwest China and tectonic significance. *Chinese Sci. Bull.* 52, 1507–1516. <https://doi.org/10.1007/s11464-007-0204-2>

Sun, Linshu, Wang, Y., Fan, W., Ji, Z., 2008. Post-orifissional potassic magmatism in the Southern Awakale Mountains, western Tianshan Orogen: Petrogenetic and tectonic implications. *Gondwana Res.* 14, 383–394. <https://doi.org/10.1016/j.gr.2008.04.002>

Sun, L.H., Wang, Y., Fan, W., Ji, Z., 2008. A further discussion of the petrogenesis and tectonic implication of the Mushanba syenite in the Baidi area, S. Jilin Univ. *Earth Sci.* 43, 78–82.

Tang, G., Chung, S., Wang, Q., Wyman, D.A., Dai, W., Chen, H., Zhao, Z., 2014. Petrogenesis of a Late Carboniferous mafic dike - granulite association in the western Tianshan : Response to the geodynamics of oceanic subduction. *LITHOS* 205, 83–99. <https://doi.org/10.1016/j.lithos.2014.04.010>

Tang, G., Wang, Q., Wyman, D.A., Li, Z., Xu, Y., Zhao, Z., 2012. Mesomaficized lithosphere - subophospher interaction during slab roll-back : Evidence from Late Carboniferous gabbros in the Luoboguo area , Central Tianshan. *LITHOS* 135, 67–80. <https://doi.org/10.1016/j.lithos.2012.08.015>

Tang, G.J., Wang, Q., Wyman, D.A., Li, Z., Xu, Y., Zhao, Z.H., Yang, Y.H., 2012. Late Carboniferous high - NbTiO<sub>2</sub>-HfO<sub>2</sub> granulites, endowite and diorite in western Jungar , NW China: Ridge-subduction-related magmatism and crustal growth. *Lithos* 146, 141–161. <https://doi.org/10.1016/j.lithos.2012.01.025>

Tian, W., Campbell, I.H., Allen, C.M., Guan, P., Fan, W., Chen, M., Yu, H., Zhu, W., 2010. The Tarim peate-basalt-dyolite suite, a Permian flood basalt from Northwest China with contrasting rhyolites produced by fractional crystallization and anatexis. *Contrib. to Mineral. Petrol.* 160, 407–425. <https://doi.org/10.1007/s00401-009-0485-3>

Wang, X., 2016. The subduction and accretion processes of the South Tianshan Orogen. Institute of Geology and Geophysics, Chinese Academy of Sciences.

Wei, X., Xu, Y.G., 2011. Petrogenesis of staurolite syenite complex from bachu area, Tarim. *Acta Petrol. Sin.* 27, 2894–3000.

Wei, X., Xu, Y.G., Fang, Y.X., Zhao, J.X., 2014. Plume-lithosphere interaction in the generation of the Tarim large igneous province, NW China: Geochemical and geochemical constraints. *Am. J. Sci.* 314, 114–130. <https://doi.org/10.2475/aj.1014.09>

Yang, H., Zhao, X., Zhang, Z., Yu, J., Fang, H., 2016. Early Paleozoic geological environment of metapelites in Bayindilake region, western Tien Shan: Igneous rocks and their dating, climatic and tectonic constraints. *Acta Petrol. Sin.* 32, 1770–1794.

Yan, S., Shan, Q., Niu, H., Yang, W., Li, N., Zeng, L., Jiang, Y., 2015. Petrology and geochemistry of late Carboniferous hornblende gabbro from the Awakale Mountains , western Tianshan (NW China ) : Implication for an arc – nascent back-arc environment. *J. Asian Earth Sci.* 113, 218–237. <https://doi.org/10.1016/j.jasce.2015.01.016>

Yang, W., Niu, H.C., Shan, Q., Chen, H.Y., Helling, P., Li, N.B., Yan, S., Zaman, R.E., 2014. Geochemistry of primary-oribiotic bearing K-rich igneous rocks in the Awakale Mountains, western Tianshan: Implications for carbon-recycling in subduction zone. *Geochim. Cosmochim. Acta* 143, 143–164. <https://doi.org/10.1016/j.gca.2014.04.003>

Yang, W., Niu, H.C., Shan, Q., Luo, Y., Sun, W.D., Li, C.Y., Li, N.B., Yu, X.Y., 2012. Late Paleozoic calc-alkaline to shoshonitic magmatism and its geodynamic implications, Yezhaomogai area, western Tianshan, Xinjiang. *Gondwana Res.* 22, 325–340. <https://doi.org/10.1016/j.gr.2011.10.008>

Yang, S.H., Zhou, M.F., 2009. Geochemistry of the ~ 40-Ma Inglelake mafic-ultramafic intrusion in Western Xinjiang, NW China: Implications for subduction-related magmatism in the South Tianshan orogenic belt. *Lithos* 113, 259–273. <https://doi.org/10.1016/j.lithos.2009.07.007>

Yu, X., Yang, S.F., Chen, H.L., Chen, Z.Q., Li, Z.L., Batt, G.E., Li, Y.Q., 2011. Permian flood basalts from the tarim basin, northwest china: SHRIMP zircon u-pb dating and geochemical characteristics. *Gondwana Res.* 20, 485–497. <https://doi.org/10.1016/j.gr.2010.11.009>

Zhang, C., Li, X., Li, Z., Yu, H., Li, C., 2008. A Permian Layered Intrusive Complex in the Western Tain Block, Northwestern China: Product of a Ca-275-Ma Mantle Plume? *J. Geol.* 116, 269–287. <https://doi.org/10.1086/587720>

Zhang, C., Xu, Y., Li, Z., Wang, H., Yu, H., 2010. Diverse Permian magmatism in the Tarim Block , NW China : Genetically linked to the Permian Tarim mantle plume? *LITHOS* 119, 337–352. <https://doi.org/10.1016/j.lithos.2010.08.007>

Zhang, C., Zhou, D., Wang, J., Wang, R., 2007. Geochemistry, geochronology and Sr-Nd isotopic composition and genesis implications of Huangjianshan granite intrusion in Kashi area of northern Tianshan. *Acta Petrol. Sin.* 23, 1821–1829.

Zhang, D., Zhang, Z., Enunemere, J., Xue, C., Duan, S., Zhao, Z., Liu, J., 2012. Petrogenesis of the Kediou composite intrusion, western Tianshan, NW China: Implications for tectonic evolution during Late Paleozoic time. *Lithos* 146–147, 65–79. <https://doi.org/10.1016/j.lithos.2012.04.002>

Zhang, D., Zhang, Z., Xue, C., Zhao, Z., Liu, J., 2010. Geochemistry and Geochemistry of the Ore-Forming Porphyry in the Lailiguo or -Lamaus Region of the Western Tianshan Mountains , Xinjiang , NW China : Implications for Petrogenesis , Metallogenesis , and Tectonic Setting. *J. Geol.* 118, 543–563. <https://doi.org/10.1086/65501>

Zhang, S., Guo, J., Dong, L., Li, J., Jiang, T., Qian, Q., Su, W., 2011. Zircon LA-ICP-MS U-Pb age of rhyolite granitoids from Qashqar copper deposit in Central Tianshan of Xinjiang and its geological implications. *Acta Petrol. Sin.* 27, 1637–1648.

Zhang, S., Klamt, R., Guo, J., Dong, L., Wang, X., Hane, K., Jiang, T., Qian, Q., 2015. Metallogenesis of the Zibo and Changmuqian volcanic iron oxide deposits in the Awakale from Metallogenic Belt, Western Tianshan. *J. Asian Earth Sci.* 113, 151–172. <https://doi.org/10.1016/j.jasce.2014.06.004>

Zhang, X., Tian, J., Guo, J., Klamt, R., Dong, L., Fan, J., Jiang, T., 2012. Geochemistry and geochemistry of granitoid rocks from the Zibo syenitic-volcanic complex iron ore deposit in the Western Tianshan Mountains (NW-China ) : Constraints on the age of mineralization and tectonic setting. *Gondwana Res.* 22, 585–596. <https://doi.org/10.1016/j.gr.2011.06.007>

Zhang, Z., Hong, W., Jiang, Z., Duan, S., Shi, L., Li, F., Guo, X., Zhao, Z., 2012. Geochemical characteristics and zircon U-Pb dating of volcanic rocks from the Baidi area iron deposit in western Tianshan Mountains, Xinjiang, NW China. *Acta Geol. Sin.* 86, 737–767. <https://doi.org/10.1111/1755-6724.12009a>

Zhang, Z., Zhang, Z., Santosh, M., Huang, H., Cheng, Z., Ye, J., 2015. Early Paleozoic magmatic record from the northern margin of the Tarim Craton : Further insights on the evolution of the Central Asian Orogenic Belt. *Gondwana Res.* 28, 328–347. <https://doi.org/10.1016/j.gr.2014.04.007>

Zhang, L., Wang, H., Akavici, D. V., Cao, Y., Beka, T.S., Liu, H., 2017. Paleozoic multi-stage accretionary evolution of the SW Chinese Tianshan : New constraints from plume complex in the Nalati Range. *Gondwana Res.* 45, 258–274. <https://doi.org/10.1016/j.gr.2016.12.012>

Zhang, M.T., Zhao, J.H., Jiang, C.Y., Cao, F., Wang, Y., Yang, S.H., 2009. OIB-like, heterogeneous mantle sources of Permian basaltic magmatism in the western Tarim Basin, NW China: Implications for a possible Permian large igneous province. *Lithos* 113, 583–594. <https://doi.org/10.1016/j.lithos.2009.06.027>

Zhu, Y., Guo, X., Song, H., Zhang, L., Gu, L., 2009. Petrology, Sr-Nd-Hf isotopic geochemistry and zircon chronology of the Late Paleozoic Tianshan Mountains, Xinjiang, NW China. *J. Geol. Soc. London* 166, 1085–1099. <https://doi.org/10.1144/0016-7607/2009-130>

Zuo, X.Y., Li, Z.L., Song, B., Fan, B.E., Li, Y.Q., Ren, Z.T., Yang, S.F., Chen, H.L., Xu, Y.G., Song, X.Y., 2015. Zircon U-Pb dating, geochronology and Sr-Nd-Pb-Hf isotopes of the Wajiang shale melt, dike, and associated diorite and syenite rocks: Implications for magmatic evolution of the Tarim large igneous province. *Lithos* 212–215, 425–442. <https://doi.org/10.1016/j.lithos.2014.09.005>



Table S4. Compilation of detrital zircon U–Pb ages from the (meta-) sedimentary rocks from Yili Basin, Central Tianshan Block, South TianshanAccretionary Complex and the northern Tarim Craton.

| Tectonic domain                                                                                                                                      | No.      | Spot No. | Th  |      | Th/U   | Isotopic ratios                      |         |                                     |        |                                      |      | Age (Ma)                            |      |                                      |      |    |      | Disc. (%) <sup>a</sup> | Preferred age (Ma) <sup>a</sup>     |  |    |  |
|------------------------------------------------------------------------------------------------------------------------------------------------------|----------|----------|-----|------|--------|--------------------------------------|---------|-------------------------------------|--------|--------------------------------------|------|-------------------------------------|------|--------------------------------------|------|----|------|------------------------|-------------------------------------|--|----|--|
|                                                                                                                                                      |          |          | ppm | ppm  |        | <sup>207</sup> Pb/ <sup>206</sup> Pb |         | 1σ                                  |        | <sup>206</sup> Pb/ <sup>238</sup> U  |      | 1σ                                  |      | <sup>207</sup> Pb/ <sup>206</sup> Pb |      | 1σ |      |                        | <sup>207</sup> Pb/ <sup>235</sup> U |  | 1σ |  |
|                                                                                                                                                      |          |          |     |      |        | <sup>207</sup> Pb/ <sup>206</sup> Pb | 1σ      | <sup>206</sup> Pb/ <sup>238</sup> U | 1σ     | <sup>207</sup> Pb/ <sup>206</sup> Pb | 1σ   | <sup>207</sup> Pb/ <sup>235</sup> U | 1σ   | <sup>206</sup> Pb/ <sup>238</sup> U  | 1σ   |    |      |                        |                                     |  |    |  |
| Sample Cdg-9, conglomerate, Early Carboniferous Dahalajunshan Formation in the Tekesi city of southern Yili basin, (Huang et al. 2018, GSA Bulletin) | Cdg-9-01 | 67       | 128 | 0.52 | 0.1003 | 0.0020                               | 4.5100  | 0.1057                              | 0.3246 | 0.0042                               | 1629 | 38                                  | 1733 | 19                                   | 1812 | 21 | 0.95 | 1629                   | 38                                  |  |    |  |
|                                                                                                                                                      | Cdg-9-02 | 133      | 169 | 0.79 | 0.0531 | 0.0022                               | 0.4252  | 0.0158                              | 0.0587 | 0.0008                               | 345  | 97                                  | 360  | 11                                   | 368  | 5  | 0.97 | 368                    | 5                                   |  |    |  |
|                                                                                                                                                      | Cdg-9-03 | 103      | 132 | 0.78 | 0.0640 | 0.0022                               | 0.9641  | 0.0302                              | 0.1103 | 0.0016                               | 740  | 74                                  | 685  | 16                                   | 675  | 9  | 0.98 | 675                    | 9                                   |  |    |  |
|                                                                                                                                                      | Cdg-9-04 | 524      | 467 | 1.12 | 0.1239 | 0.0021                               | 6.3999  | 0.1178                              | 0.3715 | 0.0044                               | 2014 | 30                                  | 2032 | 16                                   | 2036 | 20 | 0.99 | 2014                   | 30                                  |  |    |  |
|                                                                                                                                                      | Cdg-9-05 | 766      | 769 | 1.00 | 0.0648 | 0.0014                               | 0.7429  | 0.0164                              | 0.0823 | 0.0008                               | 769  | 46                                  | 564  | 10                                   | 510  | 5  | 0.89 | Discordant             |                                     |  |    |  |
|                                                                                                                                                      | Cdg-9-06 | 281      | 388 | 0.72 | 0.0788 | 0.0018                               | 2.3536  | 0.0567                              | 0.2148 | 0.0035                               | 1166 | 44                                  | 1229 | 17                                   | 1254 | 18 | 0.97 | 1166                   | 44                                  |  |    |  |
|                                                                                                                                                      | Cdg-9-07 | 147      | 120 | 1.22 | 0.0964 | 0.0023                               | 3.5735  | 0.0859                              | 0.2663 | 0.0039                               | 1555 | 44                                  | 1544 | 19                                   | 1522 | 20 | 0.98 | 1555                   | 44                                  |  |    |  |
|                                                                                                                                                      | Cdg-9-08 | 718      | 828 | 0.87 | 0.0594 | 0.0014                               | 0.4753  | 0.0110                              | 0.0575 | 0.0007                               | 583  | 52                                  | 395  | 8                                    | 361  | 4  | 0.90 | 361                    | 4                                   |  |    |  |
|                                                                                                                                                      | Cdg-9-09 | 194      | 277 | 0.70 | 0.0680 | 0.0019                               | 0.9762  | 0.0319                              | 0.1022 | 0.0016                               | 878  | 59                                  | 692  | 16                                   | 627  | 9  | 0.90 | 627                    | 9                                   |  |    |  |
|                                                                                                                                                      | Cdg-9-10 | 630      | 586 | 1.07 | 0.0974 | 0.0018                               | 2.5124  | 0.0489                              | 0.1850 | 0.0022                               | 1576 | 33                                  | 1276 | 14                                   | 1094 | 12 | 0.84 | Discordant             |                                     |  |    |  |
|                                                                                                                                                      | Cdg-9-11 | 305      | 336 | 0.91 | 0.0535 | 0.0016                               | 0.4410  | 0.0135                              | 0.0594 | 0.0009                               | 350  | 69                                  | 371  | 9                                    | 372  | 5  | 0.99 | 372                    | 5                                   |  |    |  |
|                                                                                                                                                      | Cdg-9-12 | 236      | 482 | 0.49 | 0.0565 | 0.0016                               | 0.5539  | 0.0175                              | 0.0701 | 0.0009                               | 472  | 97                                  | 448  | 11                                   | 437  | 6  | 0.97 | 437                    | 6                                   |  |    |  |
|                                                                                                                                                      | Cdg-9-13 | 202      | 433 | 0.47 | 0.0559 | 0.0017                               | 0.5425  | 0.0177                              | 0.0695 | 0.0009                               | 450  | 64                                  | 440  | 12                                   | 433  | 6  | 0.98 | 433                    | 6                                   |  |    |  |
|                                                                                                                                                      | Cdg-9-14 | 216      | 218 | 0.99 | 0.1622 | 0.0031                               | 10.6275 | 0.2319                              | 0.4703 | 0.0064                               | 2479 | 38                                  | 2491 | 20                                   | 2485 | 28 | 0.99 | 2479                   | 38                                  |  |    |  |
|                                                                                                                                                      | Cdg-9-15 | 522      | 561 | 0.93 | 0.1107 | 0.0022                               | 3.5468  | 0.0779                              | 0.2295 | 0.0025                               | 1813 | 36                                  | 1538 | 17                                   | 1332 | 13 | 0.85 | Discordant             |                                     |  |    |  |
|                                                                                                                                                      | Cdg-9-16 | 233      | 475 | 0.49 | 0.1316 | 0.0022                               | 6.9735  | 0.1324                              | 0.3801 | 0.0044                               | 2120 | 25                                  | 2108 | 17                                   | 2077 | 21 | 0.98 | 2120                   | 25                                  |  |    |  |
|                                                                                                                                                      | Cdg-9-17 | 261      | 166 | 1.57 | 0.0849 | 0.0021                               | 2.6873  | 0.0642                              | 0.2288 | 0.0031                               | 1322 | 48                                  | 1325 | 18                                   | 1328 | 16 | 0.99 | 1322                   | 48                                  |  |    |  |
|                                                                                                                                                      | Cdg-9-18 | 194      | 203 | 0.95 | 0.1098 | 0.0023                               | 4.8808  | 0.1155                              | 0.3192 | 0.0048                               | 1798 | 39                                  | 1799 | 20                                   | 1786 | 23 | 0.99 | 1798                   | 39                                  |  |    |  |
|                                                                                                                                                      | Cdg-9-19 | 119      | 209 | 0.57 | 0.0577 | 0.0021                               | 0.6389  | 0.0261                              | 0.0797 | 0.0016                               | 520  | 80                                  | 502  | 16                                   | 494  | 10 | 0.98 | 494                    | 10                                  |  |    |  |
|                                                                                                                                                      | Cdg-9-20 | 66       | 106 | 0.63 | 0.1392 | 0.0029                               | 7.8760  | 0.1739                              | 0.4070 | 0.0055                               | 2218 | 36                                  | 2217 | 20                                   | 2201 | 25 | 0.99 | 2218                   | 36                                  |  |    |  |
|                                                                                                                                                      | Cdg-9-21 | 130      | 109 | 1.19 | 0.0845 | 0.0022                               | 2.5375  | 0.0721                              | 0.2160 | 0.0034                               | 1306 | 50                                  | 1283 | 21                                   | 1261 | 18 | 0.98 | 1306                   | 50                                  |  |    |  |
|                                                                                                                                                      | Cdg-9-22 | 155      | 220 | 0.70 | 0.0597 | 0.0021                               | 0.5914  | 0.0207                              | 0.0714 | 0.0009                               | 591  | 106                                 | 472  | 13                                   | 444  | 6  | 0.94 | 444                    | 6                                   |  |    |  |
|                                                                                                                                                      | Cdg-9-23 | 572      | 502 | 1.14 | 0.0909 | 0.0020                               | 1.8601  | 0.0425                              | 0.1472 | 0.0020                               | 1456 | 38                                  | 1067 | 15                                   | 885  | 11 | 0.81 | Discordant             |                                     |  |    |  |
|                                                                                                                                                      | Cdg-9-24 | 441      | 363 | 1.22 | 0.0713 | 0.0019                               | 1.2582  | 0.0336                              | 0.1269 | 0.0017                               | 965  | 56                                  | 827  | 15                                   | 770  | 10 | 0.92 | 770                    | 10                                  |  |    |  |
|                                                                                                                                                      | Cdg-9-25 | 488      | 747 | 0.65 | 0.1104 | 0.0024                               | 4.4158  | 0.0954                              | 0.2866 | 0.0028                               | 1806 | 45                                  | 1715 | 18                                   | 1625 | 14 | 0.94 | 1806                   | 45                                  |  |    |  |
|                                                                                                                                                      | Cdg-9-26 | 253      | 248 | 1.02 | 0.0594 | 0.0021                               | 0.5932  | 0.0199                              | 0.0720 | 0.0009                               | 583  | 76                                  | 473  | 13                                   | 448  | 5  | 0.94 | 448                    | 5                                   |  |    |  |
|                                                                                                                                                      | Cdg-9-27 | 83       | 157 | 0.53 | 0.0853 | 0.0021                               | 2.8370  | 0.0699                              | 0.2392 | 0.0030                               | 1322 | 46                                  | 1365 | 18                                   | 1383 | 16 | 0.98 | 1322                   | 46                                  |  |    |  |
|                                                                                                                                                      | Cdg-9-28 | 276      | 253 | 1.09 | 0.0924 | 0.0020                               | 3.1116  | 0.0669                              | 0.2422 | 0.0031                               | 1476 | 41                                  | 1436 | 17                                   | 1398 | 16 | 0.97 | 1476                   | 41                                  |  |    |  |
|                                                                                                                                                      | Cdg-9-29 | 210      | 346 | 0.61 | 0.0559 | 0.0016                               | 0.6017  | 0.0170                              | 0.0775 | 0.0011                               | 456  | 63                                  | 478  | 11                                   | 481  | 7  | 0.99 | 481                    | 7                                   |  |    |  |
|                                                                                                                                                      | Cdg-9-30 | 517      | 636 | 0.81 | 0.0553 | 0.0015                               | 0.5675  | 0.0157                              | 0.0738 | 0.0011                               | 433  | 59                                  | 456  | 10                                   | 459  | 7  | 0.99 | 459                    | 7                                   |  |    |  |
|                                                                                                                                                      | Cdg-9-31 | 239      | 309 | 0.77 | 0.0519 | 0.0019                               | 0.4178  | 0.0153                              | 0.0579 | 0.0008                               | 280  | 83                                  | 354  | 11                                   | 363  | 5  | 0.97 | 363                    | 5                                   |  |    |  |
|                                                                                                                                                      | Cdg-9-32 | 72       | 96  | 0.75 | 0.0906 | 0.0024                               | 3.2888  | 0.0906                              | 0.2606 | 0.0038                               | 1439 | 50                                  | 1478 | 21                                   | 1493 | 19 | 0.99 | 1439                   | 50                                  |  |    |  |
|                                                                                                                                                      | Cdg-9-33 | 119      | 135 | 0.88 | 0.1053 | 0.0021                               | 4.5550  | 0.0982                              | 0.3103 | 0.0040                               | 1720 | 36                                  | 1741 | 18                                   | 1742 | 20 | 0.99 | 1720                   | 36                                  |  |    |  |
|                                                                                                                                                      | Cdg-9-34 | 47       | 245 | 0.19 | 0.0746 | 0.0017                               | 1.8394  | 0.0438                              | 0.1771 | 0.0021                               | 1057 | 46                                  | 1060 | 16                                   | 1051 | 12 | 0.99 | 1057                   | 46                                  |  |    |  |
|                                                                                                                                                      | Cdg-9-35 | 75       | 302 | 0.25 | 0.0686 | 0.0016                               | 1.3601  | 0.0334                              | 0.1422 | 0.0018                               | 887  | 81                                  | 872  | 14                                   | 857  | 10 | 0.98 | 857                    | 10                                  |  |    |  |
|                                                                                                                                                      | Cdg-9-36 | 78       | 291 | 0.27 | 0.0809 | 0.0018                               | 2.2790  | 0.0539                              | 0.2021 | 0.0027                               | 1220 | 44                                  | 1206 | 17                                   | 1186 | 14 | 0.98 | 1220                   | 44                                  |  |    |  |
|                                                                                                                                                      | Cdg-9-37 | 75       | 50  | 1.49 | 0.2497 | 0.0091                               | 21.0109 | 1.1078                              | 0.5782 | 0.0172                               | 3183 | 58                                  | 3139 | 51                                   | 2941 | 70 | 0.93 | 3183                   | 58                                  |  |    |  |
|                                                                                                                                                      | Cdg-9-38 | 227      | 229 | 0.99 | 0.0534 | 0.0020                               | 0.4428  | 0.0172                              | 0.0595 | 0.0008                               | 346  | 85                                  | 372  | 12                                   | 372  | 5  | 0.99 | 372                    | 5                                   |  |    |  |
|                                                                                                                                                      | Cdg-9-39 | 338      | 351 | 0.96 | 0.0672 | 0.0016                               | 1.2448  | 0.0298                              | 0.1334 | 0.0016                               | 843  | 51                                  | 821  | 13                                   | 807  | 9  | 0.98 | 807                    | 9                                   |  |    |  |
|                                                                                                                                                      | Cdg-9-40 | 158      | 303 | 0.52 | 0.0554 | 0.0018                               | 0.4419  | 0.0143                              | 0.0575 | 0.0007                               | 428  | 72                                  | 372  | 10                                   | 360  | 5  | 0.96 | 360                    | 5                                   |  |    |  |
|                                                                                                                                                      | Cdg-9-41 | 138      | 218 | 0.63 | 0.0712 | 0.0020                               | 1.5254  | 0.0409                              | 0.1552 | 0.0024                               | 965  | 57                                  | 941  | 16                                   | 930  | 14 | 0.98 | 930                    | 14                                  |  |    |  |
|                                                                                                                                                      | Cdg-9-42 | 340      | 527 | 0.64 | 0.0624 | 0.0017                               | 0.7043  | 0.0180                              | 0.0816 | 0.0010                               | 687  | 57                                  | 541  | 11                                   | 506  | 6  | 0.93 | 506                    | 6                                   |  |    |  |
|                                                                                                                                                      | Cdg-9-43 | 55       | 84  | 0.66 | 0.0912 | 0.0026                               | 3.4471  | 0.0944                              | 0.2748 | 0.0046                               | 1452 | 55                                  | 1515 | 22                                   | 1565 | 23 | 0.96 | 1452                   | 55                                  |  |    |  |
|                                                                                                                                                      | Cdg-9-44 | 172      | 271 | 0.63 | 0.0579 | 0.0022                               | 0.4717  | 0.0163                              | 0.0595 | 0.0008                               | 528  | 82                                  | 392  | 11                                   | 373  | 5  | 0.94 | 373                    | 5                                   |  |    |  |
|                                                                                                                                                      | Cdg-9-45 | 144      | 220 | 0.66 | 0.0569 | 0.0030                               | 0.2246  | 0.0114                              | 0.0289 | 0.0004                               | 487  | 115                                 | 206  | 9                                    | 184  | 3  | 0.88 | Discordant             |                                     |  |    |  |
|                                                                                                                                                      | Cdg-9-46 | 247      | 450 | 0.55 | 0.0742 | 0.0015                               | 1.8362  | 0.0385                              | 0.1790 | 0.0023                               | 1056 | 41                                  | 1058 | 14                                   | 1062 | 12 | 0.99 | 1056                   | 41                                  |  |    |  |
|                                                                                                                                                      | Cdg-9-47 | 113      | 214 | 0.53 | 0.0934 | 0.0020                               | 3.5104  | 0.0826                              | 0.2714 | 0.0035                               | 1498 | 42                                  | 1530 | 19                                   | 1548 | 18 | 0.98 | 1498                   | 42                                  |  |    |  |
|                                                                                                                                                      | Cdg-9-48 | 236      | 311 | 0.76 | 0.0575 | 0.0019                               | 0.6119  | 0.0209                              | 0.0775 | 0.0013                               | 522  | 74                                  | 485  | 13                                   | 481  | 8  | 0.99 | 481                    | 8                                   |  |    |  |
|                                                                                                                                                      | Cdg-9-49 | 150      | 272 | 0.55 | 0.1032 | 0.0023                               | 4.3923  | 0.1048                              | 0.3068 | 0.0039                               | 1683 | 41                                  | 1711 | 20                                   | 1725 | 19 | 0.99 | 1683                   | 41                                  |  |    |  |
|                                                                                                                                                      | Cdg-9-50 | 74       | 149 | 0.50 | 0.0771 | 0.0020                               | 2.2780  | 0.0665                              | 0.2131 | 0.0033                               | 1124 | 52                                  | 1205 | 21                                   | 1245 | 18 | 0.96 | 1124                   | 52                                  |  |    |  |
|                                                                                                                                                      | Cdg-9-51 | 156      | 179 | 0.87 | 0.0565 | 0.0028                               | 0.4653  | 0.0209                              | 0.0611 | 0.0010                               | 478  | 118                                 | 388  | 14                                   | 382  | 6  | 0.98 | 382                    | 6                                   |  |    |  |
|                                                                                                                                                      | Cdg-9-52 | 265      | 228 | 1.16 | 0.1050 | 0.0021                               | 4.5748  | 0.1013                              | 0.3125 | 0.0037                               | 1715 | 37                                  | 1745 | 18                                   | 1753 | 18 | 0.99 | 1715                   | 37                                  |  |    |  |
|                                                                                                                                                      | Cdg-9-53 | 115      | 171 | 0.67 | 0.0896 | 0.0022                               | 3.3120  | 0.0911                              | 0.2650 | 0.0042                               | 1418 | 47                                  | 1484 | 21                                   | 1516 | 22 | 0.97 | 1418                   | 47                                  |  |    |  |
|                                                                                                                                                      | Cdg-9-54 | 134      | 267 | 0.50 | 0.0626 | 0.0023                               | 0.6341  | 0.0227                              | 0.0726 | 0.0009                               | 698  | 78                                  | 499  | 14                                   | 452  | 6  | 0.90 | 452                    | 6                                   |  |    |  |
|                                                                                                                                                      | Cdg-9-55 | 438      | 364 | 1.20 | 0.0963 | 0.0024                               | 3.3015  | 0.0797                              | 0.2460 | 0.0033                               | 1554 | 45                                  | 1481 | 19                                   | 1418 | 17 | 0.95 | 1554                   | 45                                  |  |    |  |
|                                                                                                                                                      | Cdg-9-56 | 305      | 258 | 1.18 | 0.0906 | 0.0020                               | 3.1200  | 0.0723                              | 0.2466 | 0.0032                               | 1439 | 41                                  | 1438 | 18                                   | 1421 | 17 | 0.98 | 1439                   | 41                                  |  |    |  |
|                                                                                                                                                      | Cdg-9-57 | 261      | 475 | 0.55 | 0.0566 | 0.0014                               | 0.5809  | 0.0148                              | 0.0737 | 0.0008                               | 476  | 57                                  | 465  | 10                                   | 459  | 5  | 0.98 | 459                    | 5                                   |  |    |  |
|                                                                                                                                                      | Cdg-9-58 | 202      | 238 | 0.85 | 0.0966 |                                      |         |                                     |        |                                      |      |                                     |      |                                      |      |    |      |                        |                                     |  |    |  |

|                                                                                                                                                    |     |     |      |        |        |        |        |        |          |      |     |     |    |     |    |      |     |    |
|----------------------------------------------------------------------------------------------------------------------------------------------------|-----|-----|------|--------|--------|--------|--------|--------|----------|------|-----|-----|----|-----|----|------|-----|----|
| Zcaq-1-42                                                                                                                                          | 106 | 185 | 0.57 | 0.0528 | 0.0023 | 0.3965 | 0.0170 | 0.0545 | 0.0008   | 320  | 98  | 339 | 12 | 342 | 5  | 0.99 | 342 | 5  |
| Zcaq-1-43                                                                                                                                          | 128 | 170 | 0.76 | 0.0552 | 0.0024 | 0.4129 | 0.0194 | 0.0540 | 0.0010   | 420  | 100 | 351 | 14 | 339 | 6  | 0.96 | 339 | 6  |
| Zcaq-1-44                                                                                                                                          | 144 | 162 | 0.89 | 0.0558 | 0.0022 | 0.4132 | 0.0164 | 0.0540 | 0.0010   | 456  | 89  | 351 | 12 | 339 | 6  | 0.96 | 339 | 6  |
| Zcaq-1-45                                                                                                                                          | 293 | 440 | 0.67 | 0.0525 | 0.0014 | 0.3989 | 0.0105 | 0.0552 | 0.0007   | 309  | 55  | 341 | 8  | 346 | 5  | 0.98 | 346 | 5  |
| Zcaq-1-46                                                                                                                                          | 159 | 200 | 0.80 | 0.0535 | 0.0019 | 0.4109 | 0.0141 | 0.0563 | 0.0010   | 350  | 47  | 350 | 10 | 353 | 6  | 0.98 | 353 | 6  |
| Zcaq-1-47                                                                                                                                          | 128 | 204 | 0.63 | 0.0500 | 0.0018 | 0.3678 | 0.0130 | 0.0537 | 0.0008   | 195  | 83  | 318 | 10 | 337 | 5  | 0.94 | 337 | 5  |
| Zcaq-1-48                                                                                                                                          | 66  | 86  | 0.77 | 0.0557 | 0.0027 | 0.4190 | 0.0196 | 0.0553 | 0.0010   | 439  | 107 | 355 | 14 | 347 | 6  | 0.97 | 347 | 6  |
| Zcaq-1-49                                                                                                                                          | 158 | 232 | 0.68 | 0.0518 | 0.0018 | 0.3734 | 0.0129 | 0.0527 | 0.0007   | 276  | 78  | 322 | 10 | 331 | 5  | 0.97 | 331 | 5  |
| Zcaq-1-50                                                                                                                                          | 204 | 212 | 0.96 | 0.0520 | 0.0017 | 0.3640 | 0.0123 | 0.0510 | 0.0007   | 287  | 78  | 315 | 9  | 321 | 5  | 0.98 | 321 | 5  |
| Zcaq-1-51                                                                                                                                          | 134 | 206 | 0.65 | 0.0520 | 0.0019 | 0.3705 | 0.0145 | 0.0523 | 0.0012   | 283  | 83  | 320 | 11 | 329 | 7  | 0.97 | 329 | 7  |
| Zcaq-1-52                                                                                                                                          | 111 | 166 | 0.67 | 0.0489 | 0.0020 | 0.3473 | 0.0155 | 0.0514 | 0.0008   | 143  | 96  | 303 | 12 | 323 | 5  | 0.93 | 323 | 5  |
| Zcaq-1-53                                                                                                                                          | 103 | 147 | 0.70 | 0.0512 | 0.0023 | 0.3560 | 0.0153 | 0.0511 | 0.0008   | 256  | 104 | 309 | 11 | 321 | 5  | 0.96 | 321 | 5  |
| Zcaq-1-54                                                                                                                                          | 124 | 154 | 0.81 | 0.0555 | 0.0024 | 0.4031 | 0.0171 | 0.0529 | 0.0008   | 432  | 90  | 344 | 12 | 332 | 5  | 0.96 | 332 | 5  |
| Zcaq-1-55                                                                                                                                          | 143 | 157 | 0.91 | 0.0507 | 0.0020 | 0.3897 | 0.0154 | 0.0559 | 0.0009   | 228  | 61  | 334 | 11 | 350 | 5  | 0.95 | 350 | 5  |
| Zcaq-1-56                                                                                                                                          | 135 | 192 | 0.70 | 0.0510 | 0.0018 | 0.3982 | 0.0146 | 0.0567 | 0.0010   | 243  | 77  | 340 | 11 | 355 | 6  | 0.95 | 355 | 6  |
| Zcaq-1-57                                                                                                                                          | 92  | 111 | 0.83 | 0.0572 | 0.0027 | 0.4265 | 0.0197 | 0.0542 | 0.0007   | 498  | 104 | 361 | 14 | 341 | 5  | 0.94 | 341 | 5  |
| Zcaq-1-58                                                                                                                                          | 153 | 178 | 0.86 | 0.0559 | 0.0022 | 0.4070 | 0.0165 | 0.0529 | 0.0008   | 456  | 89  | 347 | 12 | 332 | 5  | 0.95 | 332 | 5  |
| Zcaq-1-59                                                                                                                                          | 83  | 122 | 0.68 | 0.0514 | 0.0023 | 0.4098 | 0.0195 | 0.0577 | 0.0012   | 257  | 106 | 349 | 14 | 362 | 7  | 0.96 | 362 | 7  |
| Zcaq-1-60                                                                                                                                          | 86  | 132 | 0.65 | 0.0499 | 0.0022 | 0.3750 | 0.0168 | 0.0547 | 0.0009   | 191  | 106 | 323 | 12 | 344 | 6  | 0.93 | 344 | 6  |
| Zcaq-1-61                                                                                                                                          | 119 | 149 | 0.80 | 0.0522 | 0.0023 | 0.3989 | 0.0164 | 0.0544 | 0.0008   | 300  | 98  | 334 | 12 | 342 | 5  | 0.97 | 342 | 5  |
| Zcaq-1-62                                                                                                                                          | 159 | 163 | 0.98 | 0.0561 | 0.0020 | 0.4096 | 0.0148 | 0.0529 | 0.0007   | 454  | 78  | 349 | 11 | 333 | 4  | 0.95 | 333 | 4  |
| Zcaq-1-63                                                                                                                                          | 192 | 298 | 0.64 | 0.0587 | 0.0015 | 0.4668 | 0.0139 | 0.0573 | 0.0007   | 567  | 57  | 389 | 10 | 359 | 4  | 0.91 | 359 | 4  |
| Zcaq-1-64                                                                                                                                          | 114 | 139 | 0.82 | 0.0536 | 0.0024 | 0.3983 | 0.0165 | 0.0534 | 0.0007   | 354  | 102 | 333 | 12 | 335 | 4  | 0.99 | 335 | 4  |
| Zcaq-1-65                                                                                                                                          | 211 | 212 | 0.99 | 0.0548 | 0.0015 | 0.4035 | 0.0113 | 0.0536 | 0.0007   | 406  | 61  | 344 | 8  | 337 | 4  | 0.97 | 337 | 4  |
| Sample Ctg-1, conglomerate, Late Carboniferous Dongtuijinhe Formation in the Tekesi city of southern Yili basin, (Huang et al. 2018, GSA Bulletin) |     |     |      |        |        |        |        |        |          |      |     |     |    |     |    |      |     |    |
| Ctg-1-01                                                                                                                                           | 69  | 165 | 0.42 | 0.0576 | 0.0030 | 0.4505 | 0.0225 | 0.0580 | 0.0011   | 522  | 119 | 378 | 16 | 363 | 7  | 0.96 | 363 | 7  |
| Ctg-1-02                                                                                                                                           | 192 | 196 | 0.98 | 0.0668 | 0.0020 | 1.2371 | 0.0371 | 0.1338 | 0.0017   | 831  | 63  | 818 | 17 | 809 | 10 | 0.98 | 809 | 10 |
| Ctg-1-03                                                                                                                                           | 45  | 78  | 0.57 | 0.0604 | 0.0036 | 0.4952 | 0.0302 | 0.0591 | 0.0012   | 617  | 130 | 408 | 20 | 370 | 7  | 0.90 | 370 | 7  |
| Ctg-1-04                                                                                                                                           | 413 | 334 | 1.23 | 0.0766 | 0.0026 | 0.5989 | 0.0208 | 0.0562 | 0.0008   | 1122 | 67  | 477 | 13 | 353 | 5  | 0.70 | 353 | 5  |
| Ctg-1-05                                                                                                                                           | 191 | 313 | 0.61 | 0.0575 | 0.0021 | 0.4224 | 0.0158 | 0.0532 | 0.0008   | 522  | 81  | 358 | 11 | 334 | 5  | 0.93 | 334 | 5  |
| Ctg-1-06                                                                                                                                           | 460 | 533 | 0.86 | 0.1073 | 0.0036 | 0.8316 | 0.0275 | 0.0559 | 0.0008   | 1754 | 61  | 615 | 15 | 351 | 5  | 0.45 | 351 | 5  |
| Ctg-1-07                                                                                                                                           | 149 | 241 | 0.62 | 0.0569 | 0.0023 | 0.4024 | 0.0164 | 0.0516 | 0.0008   | 500  | 91  | 343 | 12 | 324 | 5  | 0.94 | 324 | 5  |
| Ctg-1-08                                                                                                                                           | 191 | 314 | 0.61 | 0.0541 | 0.0022 | 0.3665 | 0.0138 | 0.0496 | 0.0007   | 372  | 91  | 317 | 10 | 312 | 4  | 0.98 | 312 | 4  |
| Ctg-1-09                                                                                                                                           | 109 | 161 | 0.68 | 0.0583 | 0.0026 | 0.4284 | 0.0203 | 0.0532 | 0.0009   | 543  | 98  | 362 | 14 | 334 | 6  | 0.91 | 334 | 6  |
| Ctg-1-10                                                                                                                                           | 246 | 354 | 0.70 | 0.0541 | 0.0017 | 0.3715 | 0.0118 | 0.0496 | 0.0006   | 376  | 77  | 321 | 9  | 312 | 4  | 0.97 | 312 | 4  |
| Ctg-1-11                                                                                                                                           | 229 | 312 | 0.73 | 0.0802 | 0.0024 | 0.5385 | 0.0164 | 0.0484 | 0.0006   | 1267 | 58  | 437 | 11 | 305 | 4  | 0.64 | 305 | 4  |
| Ctg-1-12                                                                                                                                           | 198 | 228 | 0.87 | 0.0537 | 0.0021 | 0.3663 | 0.0139 | 0.0499 | 0.0008   | 367  | 95  | 317 | 10 | 314 | 5  | 0.98 | 314 | 5  |
| Ctg-1-13                                                                                                                                           | 360 | 467 | 0.77 | 0.0560 | 0.0016 | 0.4611 | 0.0131 | 0.0595 | 0.0008   | 454  | 65  | 385 | 9  | 372 | 5  | 0.96 | 372 | 5  |
| Ctg-1-14                                                                                                                                           | 115 | 166 | 0.69 | 0.0595 | 0.0027 | 0.4290 | 0.0198 | 0.0523 | 0.0009   | 583  | 98  | 362 | 14 | 328 | 6  | 0.90 | 328 | 6  |
| Ctg-1-15                                                                                                                                           | 144 | 162 | 0.88 | 0.0591 | 0.0031 | 0.3974 | 0.0192 | 0.0499 | 0.0009   | 572  | 115 | 340 | 14 | 314 | 5  | 0.92 | 314 | 5  |
| Ctg-1-16                                                                                                                                           | 399 | 578 | 0.69 | 0.1015 | 0.0028 | 0.7604 | 0.0244 | 0.0531 | 0.0007   | 1652 | 51  | 574 | 14 | 334 | 5  | 0.47 | 334 | 5  |
| Ctg-1-17                                                                                                                                           | 312 | 441 | 0.71 | 0.0518 | 0.0017 | 0.3604 | 0.0116 | 0.0501 | 0.0006   | 276  | 69  | 313 | 9  | 315 | 4  | 0.99 | 315 | 4  |
| Ctg-1-18                                                                                                                                           | 171 | 286 | 0.60 | 0.0510 | 0.0020 | 0.3790 | 0.0148 | 0.0536 | 0.0008   | 239  | 91  | 326 | 11 | 336 | 5  | 0.96 | 336 | 5  |
| Ctg-1-19                                                                                                                                           | 331 | 422 | 0.79 | 0.0497 | 0.0017 | 0.3845 | 0.0125 | 0.0556 | 0.0008   | 189  | 78  | 330 | 9  | 349 | 5  | 0.94 | 349 | 5  |
| Ctg-1-20                                                                                                                                           | 176 | 321 | 0.55 | 0.0528 | 0.0019 | 0.4169 | 0.0152 | 0.0568 | 0.0008   | 320  | 116 | 354 | 11 | 356 | 5  | 0.99 | 356 | 5  |
| Ctg-1-21                                                                                                                                           | 166 | 268 | 0.62 | 0.0542 | 0.0021 | 0.3912 | 0.0144 | 0.0523 | 0.0007   | 389  | 87  | 335 | 10 | 329 | 4  | 0.98 | 329 | 4  |
| Ctg-1-22                                                                                                                                           | 338 | 357 | 0.95 | 0.0509 | 0.0019 | 0.3807 | 0.0133 | 0.0544 | 0.0007   | 235  | 87  | 328 | 10 | 342 | 5  | 0.95 | 342 | 5  |
| Ctg-1-23                                                                                                                                           | 279 | 255 | 1.09 | 0.0573 | 0.0025 | 0.4006 | 0.0166 | 0.0509 | 0.0008   | 502  | 64  | 342 | 12 | 320 | 5  | 0.93 | 320 | 5  |
| Ctg-1-24                                                                                                                                           | 100 | 153 | 0.65 | 0.0597 | 0.0032 | 0.4421 | 0.0219 | 0.0549 | 0.0011   | 591  | 115 | 372 | 15 | 345 | 7  | 0.92 | 345 | 7  |
| Ctg-1-25                                                                                                                                           | 207 | 331 | 0.63 | 0.0523 | 0.0018 | 0.4667 | 0.0174 | 0.0643 | 0.0011   | 298  | 81  | 389 | 12 | 401 | 7  | 0.96 | 401 | 7  |
| Ctg-1-26                                                                                                                                           | 266 | 258 | 1.03 | 0.0691 | 0.0026 | 0.4982 | 0.0179 | 0.0530 | 0.0008   | 902  | 84  | 410 | 12 | 333 | 5  | 0.79 | 333 | 5  |
| Ctg-1-27                                                                                                                                           | 214 | 303 | 0.71 | 0.0551 | 0.0024 | 0.3976 | 0.0178 | 0.0527 | 0.0008   | 413  | 94  | 340 | 13 | 331 | 5  | 0.97 | 331 | 5  |
| Ctg-1-28                                                                                                                                           | 217 | 334 | 0.65 | 0.0490 | 0.0023 | 0.3641 | 0.0181 | 0.0541 | 0.0007   | 146  | 109 | 315 | 13 | 339 | 4  | 0.92 | 339 | 4  |
| Ctg-1-29                                                                                                                                           | 243 | 263 | 0.92 | 0.0552 | 0.0029 | 0.4020 | 0.0230 | 0.0529 | 0.0008   | 433  | 151 | 343 | 17 | 332 | 5  | 0.96 | 332 | 5  |
| Ctg-1-30                                                                                                                                           | 84  | 160 | 0.53 | 0.0554 | 0.0039 | 0.3960 | 0.0300 | 0.0528 | 0.0009   | 428  | 164 | 339 | 22 | 331 | 5  | 0.97 | 331 | 5  |
| Ctg-1-31                                                                                                                                           | 168 | 193 | 0.87 | 0.0618 | 0.0033 | 1.2146 | 0.0703 | 0.1470 | 0.0028   | 733  | 121 | 807 | 32 | 884 | 15 | 0.90 | 884 | 15 |
| Ctg-1-32                                                                                                                                           | 55  | 96  | 0.57 | 0.0613 | 0.0041 | 0.4639 | 0.0318 | 0.0573 | 0.0012   | 650  | 144 | 387 | 22 | 359 | 7  | 0.92 | 359 | 7  |
| Ctg-1-33                                                                                                                                           | 241 | 400 | 0.60 | 0.0595 | 0.0025 | 0.4124 | 0.0186 | 0.0507 | 0.0007   | 587  | 88  | 351 | 13 | 319 | 4  | 0.90 | 319 | 4  |
| Ctg-1-34                                                                                                                                           | 362 | 500 | 0.72 | 0.1541 | 0.0052 | 1.2604 | 0.0504 | 0.0589 | 0.0010   | 2392 | 53  | 828 | 23 | 369 | 6  | 0.23 | 369 | 6  |
| Ctg-1-35                                                                                                                                           | 236 | 354 | 0.67 | 0.0581 | 0.0023 | 0.4074 | 0.0165 | 0.0513 | 0.0009   | 532  | 89  | 347 | 12 | 323 | 5  | 0.92 | 323 | 5  |
| Ctg-1-36                                                                                                                                           | 376 | 310 | 1.21 | 0.0644 | 0.0019 | 1.0758 | 0.0339 | 0.1209 | 0.0018   | 754  | 58  | 742 | 17 | 736 | 10 | 0.99 | 736 | 10 |
| Ctg-1-37                                                                                                                                           | 85  | 112 | 0.76 | 0.0599 | 0.0037 | 0.4305 | 0.0249 | 0.0533 | 0.0011   | 611  | 133 | 364 | 18 | 334 | 7  | 0.91 | 334 | 7  |
| Ctg-1-38                                                                                                                                           | 175 | 296 | 0.59 | 0.0514 | 0.0017 | 0.4568 | 0.0154 | 0.0644 | 0.0010   | 257  | 71  | 382 | 11 | 402 | 6  | 0.94 | 402 | 6  |
| Ctg-1-39                                                                                                                                           | 246 | 308 | 0.80 | 0.0527 | 0.0019 | 0.4306 | 0.0150 | 0.0593 | 0.0009   | 317  | 83  | 364 | 11 | 372 | 5  | 0.97 | 372 | 5  |
| Ctg-1-40                                                                                                                                           | 627 | 612 | 1.03 | 0.0966 | 0.0026 | 0.7787 | 0.0222 | 0.0578 | 0.0007   | 1561 | 50  | 585 | 13 | 362 | 4  | 0.52 | 362 | 4  |
| Ctg-1-41                                                                                                                                           | 239 | 279 | 0.86 | 0.0761 | 0.0032 | 0.5892 | 0.0237 | 0.0561 | 0.0008   | 1098 | 84  | 470 | 15 | 352 | 5  | 0.71 | 352 | 5  |
| Ctg-1-42                                                                                                                                           | 161 | 189 | 0.85 | 0.0570 | 0.0030 | 0.4021 | 0.0199 | 0.0514 | 0.0009   | 494  | 117 | 343 | 14 | 323 | 5  | 0.93 | 323 | 5  |
| Ctg-1-43                                                                                                                                           | 337 | 366 | 0.92 | 0.1443 | 0.0044 | 1.0425 | 0.0320 | 0.0522 | 0.0010   | 2280 | 52  | 725 | 16 | 328 | 6  | 0.24 | 328 | 6  |
| Ctg-1-44                                                                                                                                           | 296 | 419 | 0.71 | 0.0558 | 0.0019 | 0.3872 | 0.0127 | 0.0499 | 0.0007   | 443  | 74  | 332 | 9  | 314 | 4  | 0.94 | 314 | 4  |
| Ctg-1-45                                                                                                                                           | 169 | 289 | 0.59 | 0.0563 | 0.0022 | 0.3870 | 0.0146 | 0.0497 | 0.0007   | 465  | 87  | 332 | 11 | 313 | 4  | 0.93 | 313 | 4  |
| Ctg-1-46                                                                                                                                           | 273 | 416 | 0.66 | 0.0556 | 0.0018 | 0.3854 | 0.0131 | 0.0498 | 0.0007</ |      |     |     |    |     |    |      |     |    |



|                                                                                                                                                        |     |      |      |        |        |        |        |        |        |     |     |     |    |     |   |      |     |   |
|--------------------------------------------------------------------------------------------------------------------------------------------------------|-----|------|------|--------|--------|--------|--------|--------|--------|-----|-----|-----|----|-----|---|------|-----|---|
| Ctg-8-19                                                                                                                                               | 126 | 262  | 0.48 | 0.0556 | 0.0022 | 0.4043 | 0.0158 | 0.0527 | 0.0007 | 439 | 89  | 345 | 11 | 331 | 4 | 0.95 | 331 | 4 |
| Ctg-8-20                                                                                                                                               | 103 | 204  | 0.51 | 0.0510 | 0.0023 | 0.3693 | 0.0170 | 0.0526 | 0.0008 | 239 | 69  | 319 | 13 | 331 | 5 | 0.96 | 331 | 5 |
| Ctg-8-21                                                                                                                                               | 80  | 162  | 0.50 | 0.0533 | 0.0025 | 0.3822 | 0.0178 | 0.0527 | 0.0009 | 343 | 112 | 329 | 13 | 331 | 6 | 0.99 | 331 | 6 |
| Ctg-8-22                                                                                                                                               | 341 | 582  | 0.59 | 0.0505 | 0.0016 | 0.3674 | 0.0112 | 0.0525 | 0.0007 | 220 | 77  | 318 | 8  | 330 | 4 | 0.96 | 330 | 4 |
| Ctg-8-23                                                                                                                                               | 703 | 1026 | 0.69 | 0.0521 | 0.0014 | 0.3794 | 0.0101 | 0.0525 | 0.0007 | 300 | 61  | 327 | 7  | 330 | 4 | 0.98 | 330 | 4 |
| Ctg-8-24                                                                                                                                               | 267 | 532  | 0.50 | 0.0541 | 0.0020 | 0.3916 | 0.0138 | 0.0525 | 0.0007 | 376 | 77  | 336 | 10 | 330 | 4 | 0.98 | 330 | 4 |
| Sample Ctg-9, conglomerate, Late Carboniferous Dongtуйjinhe Formation in the Tekesi city of southern Yili basin, (Huang et al. 2018, GSA Bulletin)     |     |      |      |        |        |        |        |        |        |     |     |     |    |     |   |      |     |   |
| Ctg-9-01                                                                                                                                               | 611 | 953  | 0.64 | 0.0536 | 0.0014 | 0.3730 | 0.0097 | 0.0502 | 0.0007 | 354 | 55  | 322 | 7  | 316 | 4 | 0.98 | 316 | 4 |
| Ctg-9-02                                                                                                                                               | 487 | 785  | 0.62 | 0.0526 | 0.0015 | 0.3681 | 0.0110 | 0.0502 | 0.0007 | 322 | 60  | 318 | 8  | 316 | 4 | 0.99 | 316 | 4 |
| Ctg-9-03                                                                                                                                               | 125 | 192  | 0.65 | 0.0590 | 0.0029 | 0.3971 | 0.0179 | 0.0499 | 0.0008 | 565 | 140 | 340 | 13 | 314 | 5 | 0.92 | 314 | 5 |
| Ctg-9-04                                                                                                                                               | 417 | 578  | 0.72 | 0.0596 | 0.0019 | 0.4077 | 0.0115 | 0.0500 | 0.0007 | 591 | 69  | 347 | 8  | 315 | 4 | 0.90 | 315 | 4 |
| Ctg-9-05                                                                                                                                               | 264 | 608  | 0.43 | 0.0518 | 0.0018 | 0.3626 | 0.0129 | 0.0501 | 0.0008 | 276 | 80  | 314 | 10 | 315 | 5 | 0.99 | 315 | 5 |
| Ctg-9-06                                                                                                                                               | 114 | 188  | 0.60 | 0.0526 | 0.0027 | 0.3599 | 0.0179 | 0.0501 | 0.0010 | 322 | 121 | 312 | 13 | 315 | 6 | 0.99 | 315 | 6 |
| Ctg-9-07                                                                                                                                               | 226 | 386  | 0.58 | 0.0504 | 0.0020 | 0.3513 | 0.0139 | 0.0505 | 0.0007 | 213 | 93  | 306 | 10 | 318 | 5 | 0.96 | 318 | 5 |
| Ctg-9-08                                                                                                                                               | 535 | 887  | 0.60 | 0.0585 | 0.0018 | 0.4045 | 0.0125 | 0.0503 | 0.0008 | 550 | 67  | 345 | 9  | 316 | 5 | 0.91 | 316 | 5 |
| Ctg-9-09                                                                                                                                               | 464 | 712  | 0.65 | 0.0544 | 0.0015 | 0.3765 | 0.0106 | 0.0499 | 0.0006 | 391 | 63  | 324 | 8  | 314 | 4 | 0.96 | 314 | 4 |
| Ctg-9-10                                                                                                                                               | 374 | 702  | 0.53 | 0.0544 | 0.0017 | 0.3793 | 0.0119 | 0.0503 | 0.0007 | 387 | 69  | 326 | 9  | 316 | 4 | 0.96 | 316 | 4 |
| Ctg-9-11                                                                                                                                               | 615 | 984  | 0.62 | 0.0557 | 0.0017 | 0.3935 | 0.0117 | 0.0509 | 0.0007 | 439 | 67  | 337 | 9  | 320 | 4 | 0.94 | 320 | 4 |
| Ctg-9-12                                                                                                                                               | 93  | 196  | 0.47 | 0.0530 | 0.0027 | 0.3662 | 0.0187 | 0.0504 | 0.0009 | 328 | 113 | 317 | 14 | 317 | 6 | 0.99 | 317 | 6 |
| Ctg-9-13                                                                                                                                               | 796 | 1129 | 0.70 | 0.0527 | 0.0014 | 0.3726 | 0.0105 | 0.0508 | 0.0007 | 317 | 61  | 322 | 8  | 320 | 4 | 0.99 | 320 | 4 |
| Ctg-9-14                                                                                                                                               | 125 | 229  | 0.55 | 0.0563 | 0.0029 | 0.3907 | 0.0200 | 0.0503 | 0.0009 | 465 | 113 | 335 | 15 | 316 | 5 | 0.94 | 316 | 5 |
| Sample Ctg-4, Pebbly sandstone, Late Carboniferous Dongtуйjinhe Formation in the Tekesi city of southern Yili basin, (Huang et al. 2018, GSA Bulletin) |     |      |      |        |        |        |        |        |        |     |     |     |    |     |   |      |     |   |
| Ctg-4-01                                                                                                                                               | 235 | 333  | 0.71 | 0.0526 | 0.0020 | 0.3676 | 0.0151 | 0.0502 | 0.0007 | 322 | 82  | 318 | 11 | 316 | 5 | 0.99 | 316 | 5 |
| Ctg-4-02                                                                                                                                               | 110 | 176  | 0.63 | 0.0547 | 0.0027 | 0.3848 | 0.0189 | 0.0511 | 0.0008 | 467 | 109 | 331 | 14 | 321 | 5 | 0.97 | 321 | 5 |
| Ctg-4-03                                                                                                                                               | 160 | 235  | 0.68 | 0.0564 | 0.0024 | 0.3922 | 0.0164 | 0.0507 | 0.0007 | 478 | 94  | 336 | 12 | 319 | 4 | 0.94 | 319 | 4 |
| Ctg-4-04                                                                                                                                               | 199 | 295  | 0.67 | 0.0497 | 0.0021 | 0.3466 | 0.0149 | 0.0504 | 0.0008 | 189 | 98  | 302 | 11 | 317 | 5 | 0.95 | 317 | 5 |
| Ctg-4-05                                                                                                                                               | 135 | 211  | 0.64 | 0.0516 | 0.0027 | 0.3561 | 0.0179 | 0.0505 | 0.0009 | 265 | 123 | 309 | 13 | 317 | 6 | 0.97 | 317 | 6 |
| Ctg-4-06                                                                                                                                               | 348 | 465  | 0.75 | 0.0571 | 0.0021 | 0.4018 | 0.0146 | 0.0506 | 0.0007 | 498 | 78  | 343 | 11 | 318 | 5 | 0.92 | 318 | 5 |
| Ctg-4-07                                                                                                                                               | 170 | 275  | 0.62 | 0.0567 | 0.0023 | 0.4173 | 0.0179 | 0.0527 | 0.0008 | 480 | 91  | 354 | 13 | 331 | 5 | 0.93 | 331 | 5 |
| Ctg-4-08                                                                                                                                               | 112 | 178  | 0.63 | 0.0530 | 0.0028 | 0.3585 | 0.0188 | 0.0495 | 0.0008 | 328 | 116 | 311 | 14 | 312 | 5 | 0.99 | 312 | 5 |
| Ctg-4-09                                                                                                                                               | 267 | 310  | 0.86 | 0.0507 | 0.0019 | 0.3527 | 0.0127 | 0.0504 | 0.0007 | 233 | 61  | 307 | 10 | 317 | 4 | 0.96 | 317 | 4 |
| Ctg-4-10                                                                                                                                               | 120 | 237  | 0.50 | 0.0574 | 0.0027 | 0.3963 | 0.0180 | 0.0503 | 0.0008 | 506 | 104 | 339 | 13 | 316 | 5 | 0.93 | 316 | 5 |
| Ctg-4-11                                                                                                                                               | 162 | 268  | 0.60 | 0.0571 | 0.0027 | 0.3984 | 0.0183 | 0.0506 | 0.0008 | 494 | 106 | 340 | 13 | 318 | 5 | 0.93 | 318 | 5 |
| Ctg-4-12                                                                                                                                               | 231 | 355  | 0.65 | 0.0552 | 0.0023 | 0.3842 | 0.0155 | 0.0500 | 0.0008 | 433 | 91  | 330 | 11 | 314 | 5 | 0.95 | 314 | 5 |
| Ctg-4-13                                                                                                                                               | 167 | 229  | 0.73 | 0.0550 | 0.0024 | 0.3788 | 0.0159 | 0.0504 | 0.0009 | 413 | 98  | 326 | 12 | 317 | 6 | 0.97 | 317 | 6 |
| Ctg-4-14                                                                                                                                               | 179 | 289  | 0.62 | 0.0518 | 0.0022 | 0.3632 | 0.0153 | 0.0509 | 0.0008 | 276 | 98  | 315 | 11 | 320 | 5 | 0.98 | 320 | 5 |
| Ctg-4-15                                                                                                                                               | 159 | 242  | 0.66 | 0.0536 | 0.0024 | 0.3764 | 0.0173 | 0.0506 | 0.0009 | 367 | 100 | 324 | 13 | 318 | 5 | 0.98 | 318 | 5 |
| Ctg-4-16                                                                                                                                               | 225 | 254  | 0.89 | 0.0534 | 0.0024 | 0.3681 | 0.0154 | 0.0501 | 0.0007 | 346 | 100 | 318 | 11 | 315 | 4 | 0.98 | 315 | 4 |
| Ctg-4-17                                                                                                                                               | 228 | 401  | 0.57 | 0.0566 | 0.0019 | 0.3966 | 0.0135 | 0.0505 | 0.0007 | 476 | 42  | 339 | 10 | 317 | 4 | 0.93 | 317 | 4 |
| Ctg-4-18                                                                                                                                               | 169 | 326  | 0.52 | 0.0550 | 0.0022 | 0.3831 | 0.0149 | 0.0505 | 0.0007 | 413 | 93  | 329 | 11 | 318 | 4 | 0.96 | 318 | 4 |
| Ctg-4-19                                                                                                                                               | 200 | 262  | 0.76 | 0.0507 | 0.0021 | 0.3565 | 0.0144 | 0.0512 | 0.0008 | 228 | 96  | 310 | 11 | 322 | 5 | 0.96 | 322 | 5 |
| Ctg-4-20                                                                                                                                               | 164 | 271  | 0.60 | 0.0524 | 0.0021 | 0.3829 | 0.0154 | 0.0531 | 0.0008 | 302 | 93  | 329 | 11 | 334 | 5 | 0.98 | 334 | 5 |
| Ctg-4-21                                                                                                                                               | 319 | 468  | 0.68 | 0.0518 | 0.0016 | 0.3650 | 0.0119 | 0.0509 | 0.0007 | 276 | 68  | 316 | 9  | 320 | 4 | 0.98 | 320 | 4 |
| Ctg-4-22                                                                                                                                               | 249 | 369  | 0.67 | 0.0530 | 0.0022 | 0.3664 | 0.0146 | 0.0502 | 0.0006 | 332 | 101 | 317 | 11 | 315 | 4 | 0.99 | 315 | 4 |
| Ctg-4-23                                                                                                                                               | 439 | 430  | 1.02 | 0.0572 | 0.0020 | 0.3908 | 0.0136 | 0.0495 | 0.0006 | 498 | 78  | 335 | 10 | 311 | 4 | 0.92 | 311 | 4 |
| Ctg-4-24                                                                                                                                               | 170 | 318  | 0.53 | 0.0499 | 0.0020 | 0.3645 | 0.0153 | 0.0527 | 0.0008 | 187 | 90  | 316 | 11 | 331 | 5 | 0.95 | 331 | 5 |
| Ctg-4-25                                                                                                                                               | 181 | 303  | 0.60 | 0.0542 | 0.0021 | 0.3773 | 0.0141 | 0.0506 | 0.0008 | 389 | 82  | 325 | 10 | 318 | 5 | 0.97 | 318 | 5 |
| Ctg-4-26                                                                                                                                               | 144 | 130  | 1.10 | 0.0560 | 0.0032 | 0.3857 | 0.0217 | 0.0504 | 0.0011 | 454 | 126 | 331 | 16 | 317 | 7 | 0.95 | 317 | 7 |
| Ctg-4-27                                                                                                                                               | 321 | 371  | 0.87 | 0.0509 | 0.0019 | 0.3554 | 0.0143 | 0.0499 | 0.0007 | 239 | 85  | 309 | 11 | 314 | 4 | 0.98 | 314 | 4 |
| Ctg-4-28                                                                                                                                               | 191 | 345  | 0.55 | 0.0534 | 0.0023 | 0.3685 | 0.0167 | 0.0502 | 0.0008 | 346 | 94  | 319 | 12 | 316 | 5 | 0.99 | 316 | 5 |
| Ctg-4-29                                                                                                                                               | 200 | 278  | 0.72 | 0.0532 | 0.0023 | 0.3651 | 0.0162 | 0.0497 | 0.0008 | 339 | 98  | 316 | 12 | 313 | 5 | 0.99 | 313 | 5 |
| Ctg-4-30                                                                                                                                               | 177 | 255  | 0.70 | 0.0540 | 0.0021 | 0.3778 | 0.0150 | 0.0509 | 0.0008 | 369 | 89  | 325 | 11 | 320 | 5 | 0.98 | 320 | 5 |
| Ctg-4-31                                                                                                                                               | 99  | 169  | 0.58 | 0.0491 | 0.0022 | 0.3497 | 0.0168 | 0.0514 | 0.0009 | 154 | 101 | 305 | 13 | 323 | 6 | 0.94 | 323 | 6 |
| Ctg-4-32                                                                                                                                               | 253 | 312  | 0.81 | 0.0574 | 0.0020 | 0.5134 | 0.0185 | 0.0648 | 0.0011 | 506 | 81  | 421 | 12 | 404 | 7 | 0.96 | 404 | 7 |
| Ctg-4-33                                                                                                                                               | 191 | 267  | 0.72 | 0.0496 | 0.0020 | 0.3489 | 0.0127 | 0.0518 | 0.0009 | 172 | 94  | 304 | 10 | 326 | 5 | 0.93 | 326 | 5 |
| Ctg-4-34                                                                                                                                               | 243 | 335  | 0.73 | 0.0600 | 0.0024 | 0.4546 | 0.0192 | 0.0544 | 0.0008 | 611 | 82  | 381 | 13 | 342 | 5 | 0.89 | 342 | 5 |
| Ctg-4-35                                                                                                                                               | 98  | 161  | 0.61 | 0.0597 | 0.0034 | 0.4059 | 0.0214 | 0.0502 | 0.0009 | 592 | 122 | 346 | 15 | 316 | 5 | 0.90 | 316 | 5 |
| Ctg-4-36                                                                                                                                               | 236 | 311  | 0.76 | 0.0526 | 0.0023 | 0.3651 | 0.0158 | 0.0506 | 0.0009 | 322 | 96  | 316 | 12 | 318 | 6 | 0.99 | 318 | 6 |
| Ctg-4-37                                                                                                                                               | 113 | 192  | 0.59 | 0.0577 | 0.0028 | 0.4043 | 0.0192 | 0.0509 | 0.0009 | 517 | 108 | 345 | 14 | 320 | 5 | 0.92 | 320 | 5 |
| Ctg-4-38                                                                                                                                               | 142 | 234  | 0.61 | 0.0525 | 0.0024 | 0.3737 | 0.0184 | 0.0512 | 0.0009 | 309 | 106 | 322 | 14 | 322 | 5 | 0.99 |     |   |

Yili Basin

|                                                                                                                                                        |     |      |      |        |        |         |        |        |        |      |     |      |    |      |    |      |            |    |
|--------------------------------------------------------------------------------------------------------------------------------------------------------|-----|------|------|--------|--------|---------|--------|--------|--------|------|-----|------|----|------|----|------|------------|----|
| Shg-1-14                                                                                                                                               | 955 | 1262 | 0.76 | 0.0552 | 0.0015 | 0.3666  | 0.0108 | 0.0475 | 0.0005 | 420  | 56  | 317  | 8  | 299  | 3  | 0.94 | 299        | 3  |
| Shg-1-15                                                                                                                                               | 222 | 469  | 0.47 | 0.0504 | 0.0018 | 0.4110  | 0.0163 | 0.0584 | 0.0010 | 213  | 85  | 350  | 12 | 366  | 6  | 0.95 | 366        | 6  |
| Shg-1-16                                                                                                                                               | 774 | 1077 | 0.72 | 0.0498 | 0.0014 | 0.3261  | 0.0095 | 0.0471 | 0.0005 | 183  | 67  | 287  | 7  | 296  | 3  | 0.96 | 296        | 3  |
| Shg-1-17                                                                                                                                               | 117 | 197  | 0.59 | 0.0576 | 0.0030 | 0.3773  | 0.0198 | 0.0472 | 0.0007 | 522  | 118 | 325  | 15 | 297  | 4  | 0.91 | 297        | 4  |
| Shg-1-18                                                                                                                                               | 170 | 208  | 0.82 | 0.0527 | 0.0031 | 0.3344  | 0.0185 | 0.0468 | 0.0008 | 317  | 140 | 293  | 14 | 295  | 5  | 0.99 | 295        | 5  |
| Shg-1-19                                                                                                                                               | 825 | 1010 | 0.82 | 0.0534 | 0.0016 | 0.3516  | 0.0110 | 0.0472 | 0.0005 | 343  | 67  | 306  | 8  | 297  | 3  | 0.97 | 297        | 3  |
| Shg-1-20                                                                                                                                               | 332 | 650  | 0.51 | 0.0500 | 0.0018 | 0.3333  | 0.0125 | 0.0479 | 0.0006 | 195  | 83  | 292  | 10 | 302  | 4  | 0.96 | 302        | 4  |
| Sample Shg-2, conglomerate, Late Carboniferous Kegouqinshan Formation in the Tekesi city of southern Yili basin, (Huang et al. 2018, GSA Bulletin)     |     |      |      |        |        |         |        |        |        |      |     |      |    |      |    |      |            |    |
| Shg-2-01                                                                                                                                               | 141 | 253  | 0.56 | 0.0652 | 0.0087 | 0.5899  | 0.0732 | 0.0660 | 0.0007 | 783  | 281 | 471  | 47 | 412  | 4  | 0.86 |            |    |
| Shg-2-02                                                                                                                                               | 73  | 146  | 0.50 | 0.0493 | 0.0028 | 0.4630  | 0.0269 | 0.0674 | 0.0009 | 161  | 127 | 386  | 19 | 421  | 5  | 0.91 | 421        | 5  |
| Shg-2-03                                                                                                                                               | 187 | 284  | 0.66 | 0.0533 | 0.0020 | 0.4896  | 0.0175 | 0.0665 | 0.0007 | 343  | 88  | 405  | 12 | 415  | 4  | 0.97 | 415        | 4  |
| Shg-2-04                                                                                                                                               | 120 | 229  | 0.52 | 0.0582 | 0.0024 | 0.5199  | 0.0196 | 0.0654 | 0.0008 | 600  | 95  | 425  | 13 | 409  | 5  | 0.96 | 409        | 5  |
| Shg-2-05                                                                                                                                               | 106 | 214  | 0.50 | 0.0551 | 0.0024 | 0.5079  | 0.0208 | 0.0671 | 0.0008 | 417  | 96  | 417  | 14 | 418  | 5  | 0.99 | 418        | 5  |
| Shg-2-06                                                                                                                                               | 219 | 349  | 0.63 | 0.0552 | 0.0021 | 0.5065  | 0.0186 | 0.0664 | 0.0007 | 420  | 85  | 416  | 13 | 414  | 5  | 0.99 | 414        | 5  |
| Shg-2-07                                                                                                                                               | 163 | 192  | 0.85 | 0.0590 | 0.0029 | 0.5383  | 0.0264 | 0.0660 | 0.0009 | 565  | 109 | 437  | 17 | 412  | 5  | 0.94 | 412        | 5  |
| Shg-2-08                                                                                                                                               | 95  | 153  | 0.62 | 0.0570 | 0.0027 | 0.5258  | 0.0266 | 0.0660 | 0.0009 | 500  | 103 | 429  | 18 | 412  | 6  | 0.95 | 412        | 6  |
| Shg-2-09                                                                                                                                               | 124 | 208  | 0.60 | 0.0597 | 0.0029 | 0.5475  | 0.0265 | 0.0661 | 0.0009 | 594  | 106 | 443  | 17 | 412  | 6  | 0.92 | 412        | 6  |
| Shg-2-10                                                                                                                                               | 76  | 126  | 0.60 | 0.0552 | 0.0030 | 0.5080  | 0.0284 | 0.0663 | 0.0009 | 420  | 122 | 417  | 19 | 414  | 6  | 0.99 | 414        | 6  |
| Shg-2-11                                                                                                                                               | 96  | 159  | 0.60 | 0.0563 | 0.0030 | 0.5111  | 0.0252 | 0.0663 | 0.0009 | 465  | 123 | 419  | 17 | 414  | 5  | 0.98 | 414        | 5  |
| Shg-2-12                                                                                                                                               | 107 | 188  | 0.57 | 0.0605 | 0.0029 | 0.5597  | 0.0262 | 0.0672 | 0.0009 | 620  | 102 | 451  | 17 | 419  | 6  | 0.92 | 419        | 6  |
| Shg-2-13                                                                                                                                               | 133 | 201  | 0.66 | 0.0547 | 0.0017 | 0.5028  | 0.0155 | 0.0665 | 0.0008 | 398  | 75  | 414  | 10 | 415  | 5  | 0.99 | 415        | 5  |
| Shg-2-15                                                                                                                                               | 140 | 205  | 0.69 | 0.0559 | 0.0025 | 0.5102  | 0.0221 | 0.0663 | 0.0009 | 456  | 98  | 419  | 15 | 414  | 5  | 0.98 | 414        | 5  |
| Shg-2-16                                                                                                                                               | 134 | 199  | 0.67 | 0.0786 | 0.0051 | 0.7431  | 0.0527 | 0.0669 | 0.0008 | 1162 | 129 | 564  | 31 | 417  | 5  | 0.70 | Discordant |    |
| Shg-2-17                                                                                                                                               | 240 | 403  | 0.59 | 0.0566 | 0.0025 | 0.5145  | 0.0231 | 0.0657 | 0.0008 | 476  | 98  | 421  | 15 | 410  | 5  | 0.97 | 410        | 5  |
| Shg-2-18                                                                                                                                               | 267 | 433  | 0.62 | 0.0553 | 0.0019 | 0.5066  | 0.0172 | 0.0663 | 0.0008 | 433  | 76  | 416  | 12 | 414  | 5  | 0.99 | 414        | 5  |
| Shg-2-19                                                                                                                                               | 189 | 304  | 0.62 | 0.0532 | 0.0016 | 0.4842  | 0.0143 | 0.0658 | 0.0007 | 345  | 67  | 401  | 10 | 411  | 5  | 0.97 | 411        | 5  |
| Shg-2-20                                                                                                                                               | 146 | 226  | 0.65 | 0.0557 | 0.0022 | 0.5021  | 0.0191 | 0.0655 | 0.0008 | 439  | 89  | 413  | 13 | 409  | 5  | 0.99 | 409        | 5  |
| Shg-2-21                                                                                                                                               | 142 | 253  | 0.56 | 0.0589 | 0.0028 | 0.5381  | 0.0238 | 0.0668 | 0.0008 | 565  | 104 | 437  | 16 | 417  | 5  | 0.95 | 417        | 5  |
| Sample Shg-3, conglomerate, Late Carboniferous Kegouqinshan Formation in the Tekesi city of southern Yili basin, (Huang et al. 2018, GSA Bulletin)     |     |      |      |        |        |         |        |        |        |      |     |      |    |      |    |      |            |    |
| Shg-3-01                                                                                                                                               | 128 | 200  | 0.64 | 0.0625 | 0.0045 | 0.4713  | 0.0302 | 0.0567 | 0.0011 | 694  | 154 | 392  | 21 | 355  | 6  | 0.90 | 355        | 6  |
| Shg-3-02                                                                                                                                               | 191 | 285  | 0.67 | 0.0569 | 0.0031 | 0.4399  | 0.0238 | 0.0563 | 0.0009 | 487  | 120 | 370  | 17 | 353  | 6  | 0.95 | 353        | 6  |
| Shg-3-03                                                                                                                                               | 237 | 356  | 0.67 | 0.0736 | 0.0038 | 0.5827  | 0.0312 | 0.0570 | 0.0011 | 1031 | 110 | 466  | 20 | 358  | 7  | 0.73 | Discordant |    |
| Shg-3-04                                                                                                                                               | 180 | 289  | 0.62 | 0.0572 | 0.0030 | 0.4385  | 0.0203 | 0.0559 | 0.0007 | 498  | 110 | 369  | 14 | 351  | 5  | 0.94 | 351        | 5  |
| Shg-3-05                                                                                                                                               | 391 | 422  | 0.93 | 0.0581 | 0.0032 | 0.4517  | 0.0262 | 0.0559 | 0.0008 | 532  | 122 | 378  | 18 | 351  | 5  | 0.92 | 351        | 5  |
| Shg-3-06                                                                                                                                               | 141 | 226  | 0.62 | 0.0567 | 0.0025 | 0.4377  | 0.0195 | 0.0559 | 0.0007 | 480  | 94  | 369  | 14 | 351  | 4  | 0.94 | 351        | 4  |
| Shg-3-07                                                                                                                                               | 162 | 311  | 0.52 | 0.0588 | 0.0035 | 0.4435  | 0.0253 | 0.0553 | 0.0009 | 567  | 131 | 373  | 18 | 347  | 6  | 0.92 | 347        | 6  |
| Shg-3-08                                                                                                                                               | 357 | 499  | 0.71 | 0.0589 | 0.0040 | 0.4534  | 0.0298 | 0.0558 | 0.0008 | 565  | 146 | 380  | 21 | 350  | 5  | 0.91 | 350        | 5  |
| Shg-3-09                                                                                                                                               | 136 | 216  | 0.63 | 0.0556 | 0.0022 | 0.4952  | 0.0190 | 0.0649 | 0.0011 | 439  | 89  | 408  | 13 | 405  | 6  | 0.99 | 405        | 6  |
| Shg-3-10                                                                                                                                               | 173 | 262  | 0.66 | 0.0593 | 0.0033 | 0.4444  | 0.0260 | 0.0542 | 0.0010 | 576  | 122 | 373  | 18 | 340  | 6  | 0.90 | 340        | 6  |
| Shg-3-11                                                                                                                                               | 165 | 245  | 0.67 | 0.0551 | 0.0031 | 0.4149  | 0.0228 | 0.0550 | 0.0008 | 417  | 128 | 352  | 16 | 345  | 5  | 0.97 | 345        | 5  |
| Shg-3-12                                                                                                                                               | 261 | 407  | 0.64 | 0.0542 | 0.0025 | 0.4254  | 0.0203 | 0.0567 | 0.0008 | 389  | 73  | 360  | 14 | 355  | 5  | 0.98 | 355        | 5  |
| Shg-3-13                                                                                                                                               | 170 | 259  | 0.66 | 0.0584 | 0.0060 | 0.4405  | 0.0427 | 0.0553 | 0.0012 | 543  | 226 | 371  | 30 | 347  | 7  | 0.93 | 347        | 7  |
| Shg-3-14                                                                                                                                               | 219 | 388  | 0.57 | 0.0529 | 0.0027 | 0.4062  | 0.0211 | 0.0557 | 0.0008 | 324  | 112 | 346  | 15 | 350  | 5  | 0.98 | 350        | 5  |
| Shg-3-15                                                                                                                                               | 168 | 397  | 0.42 | 0.0525 | 0.0025 | 0.4093  | 0.0189 | 0.0566 | 0.0008 | 309  | 107 | 348  | 14 | 355  | 5  | 0.98 | 355        | 5  |
| Sample Shg-4, Pebbly sandstone, Late Carboniferous Kegouqinshan Formation in the Tekesi city of southern Yili basin, (Huang et al. 2018, GSA Bulletin) |     |      |      |        |        |         |        |        |        |      |     |      |    |      |    |      |            |    |
| Shg-4-01                                                                                                                                               | 31  | 76   | 0.41 | 0.0576 | 0.0046 | 0.3809  | 0.0300 | 0.0488 | 0.0007 | 517  | 174 | 328  | 22 | 307  | 5  | 0.93 | 307        | 5  |
| Shg-4-02                                                                                                                                               | 52  | 87   | 0.60 | 0.0608 | 0.0030 | 0.5647  | 0.0283 | 0.0676 | 0.0010 | 632  | 112 | 455  | 18 | 421  | 6  | 0.92 | 421        | 6  |
| Shg-4-03                                                                                                                                               | 67  | 165  | 0.41 | 0.0583 | 0.0022 | 0.6081  | 0.0228 | 0.0759 | 0.0009 | 539  | 83  | 482  | 14 | 472  | 5  | 0.97 | 472        | 5  |
| Shg-4-04                                                                                                                                               | 43  | 79   | 0.54 | 0.0609 | 0.0037 | 0.5757  | 0.0363 | 0.0692 | 0.0011 | 635  | 130 | 462  | 23 | 432  | 7  | 0.93 | 432        | 7  |
| Shg-4-05                                                                                                                                               | 32  | 37   | 0.85 | 0.0641 | 0.0043 | 0.6021  | 0.0353 | 0.0698 | 0.0015 | 746  | 144 | 479  | 22 | 435  | 9  | 0.90 | 435        | 9  |
| Shg-4-06                                                                                                                                               | 189 | 304  | 0.62 | 0.0526 | 0.0017 | 0.4844  | 0.0157 | 0.0669 | 0.0008 | 322  | 72  | 401  | 11 | 417  | 5  | 0.96 | 417        | 5  |
| Shg-4-07                                                                                                                                               | 148 | 282  | 0.53 | 0.0651 | 0.0016 | 1.1523  | 0.0299 | 0.1282 | 0.0014 | 777  | 52  | 778  | 14 | 778  | 8  | 0.99 | 778        | 8  |
| Shg-4-08                                                                                                                                               | 39  | 76   | 0.52 | 0.1591 | 0.0035 | 10.1729 | 0.2318 | 0.4630 | 0.0052 | 2447 | 37  | 2451 | 21 | 2453 | 23 | 0.99 | 2447       | 37 |
| Shg-4-09                                                                                                                                               | 385 | 547  | 0.70 | 0.0546 | 0.0014 | 0.5171  | 0.0128 | 0.0685 | 0.0007 | 398  | 57  | 423  | 9  | 427  | 4  | 0.99 | 427        | 4  |
| Shg-4-10                                                                                                                                               | 283 | 295  | 0.96 | 0.0579 | 0.0022 | 0.4714  | 0.0171 | 0.0590 | 0.0006 | 528  | 83  | 392  | 12 | 370  | 4  | 0.94 | 370        | 4  |
| Shg-4-11                                                                                                                                               | 125 | 179  | 0.70 | 0.0558 | 0.0022 | 0.5410  | 0.0219 | 0.0701 | 0.0009 | 443  | 89  | 439  | 14 | 437  | 6  | 0.99 | 437        | 6  |
| Shg-4-12                                                                                                                                               | 174 | 228  | 0.76 | 0.0516 | 0.0020 | 0.5217  | 0.0188 | 0.0736 | 0.0009 | 265  | 89  | 426  | 13 | 458  | 5  | 0.92 | 458        | 5  |
| Shg-4-13                                                                                                                                               | 108 | 176  | 0.61 | 0.0561 | 0.0022 | 0.5169  | 0.0201 | 0.0669 | 0.0009 | 454  | 89  | 423  | 13 | 418  | 5  | 0.98 | 418        | 5  |
| Shg-4-14                                                                                                                                               | 142 | 232  | 0.61 | 0.1651 | 0.0031 | 10.6625 | 0.1924 | 0.4654 | 0.0041 | 2509 | 31  | 2494 | 17 | 2463 | 18 | 0.98 | 2509       | 31 |
| Shg-4-15                                                                                                                                               | 248 | 404  | 0.61 | 0.0573 | 0.0016 | 0.5803  | 0.0153 | 0.0733 | 0.0008 | 502  | 59  | 465  | 10 | 456  | 5  | 0.98 | 456        | 5  |
| Shg-4-16                                                                                                                                               | 362 | 422  | 0.86 | 0.0602 | 0.0017 | 0.5019  | 0.0148 | 0.0602 | 0.0007 | 613  | 63  | 413  | 10 | 377  | 4  | 0.90 | 377        | 4  |
| Shg-4-17                                                                                                                                               | 106 | 125  | 0.   |        |        |         |        |        |        |      |     |      |    |      |    |      |            |    |

|                                                                                                                                                     |           |     |     |      |        |        |         |        |        |        |      |     |      |    |      |    |      |            |    |
|-----------------------------------------------------------------------------------------------------------------------------------------------------|-----------|-----|-----|------|--------|--------|---------|--------|--------|--------|------|-----|------|----|------|----|------|------------|----|
|                                                                                                                                                     | Shg-4-75  | 156 | 352 | 0.44 | 0.0635 | 0.0019 | 1.0212  | 0.0306 | 0.1161 | 0.0012 | 724  | 65  | 715  | 15 | 708  | 7  | 0.99 | 708        | 7  |
|                                                                                                                                                     | Shg-4-76  | 158 | 251 | 0.63 | 0.0489 | 0.0016 | 1.2426  | 0.0406 | 0.1833 | 0.0020 | 146  | 78  | 820  | 18 | 1085 | 11 | 0.72 | Discordant |    |
|                                                                                                                                                     | Shg-4-77  | 43  | 54  | 0.79 | 0.0759 | 0.0032 | 2.0365  | 0.0854 | 0.1941 | 0.0025 | 1092 | 84  | 1128 | 29 | 1143 | 14 | 0.98 | 1092       | 84 |
|                                                                                                                                                     | Shg-4-78  | 127 | 238 | 0.53 | 0.0559 | 0.0023 | 0.5243  | 0.0225 | 0.0677 | 0.0007 | 450  | 93  | 428  | 15 | 422  | 5  | 0.98 | 422        | 5  |
|                                                                                                                                                     | Shg-4-79  | 31  | 43  | 0.72 | 0.0645 | 0.0054 | 0.5757  | 0.0425 | 0.0682 | 0.0016 | 767  | 176 | 462  | 27 | 425  | 9  | 0.91 | 425        | 9  |
|                                                                                                                                                     | Shg-4-80  | 129 | 286 | 0.45 | 0.1744 | 0.0034 | 11.7635 | 0.2295 | 0.4864 | 0.0038 | 2611 | 32  | 2586 | 18 | 2555 | 16 | 0.98 | 2611       | 32 |
|                                                                                                                                                     | Shg-4-81  | 134 | 254 | 0.52 | 0.0534 | 0.0024 | 0.4975  | 0.0218 | 0.0676 | 0.0008 | 346  | 102 | 410  | 15 | 422  | 5  | 0.97 | 422        | 5  |
|                                                                                                                                                     | Shg-4-82  | 26  | 41  | 0.62 | 0.0648 | 0.0058 | 0.5797  | 0.0444 | 0.0674 | 0.0013 | 769  | 189 | 464  | 29 | 421  | 8  | 0.90 | 421        | 8  |
|                                                                                                                                                     | Shg-4-83  | 152 | 268 | 0.57 | 0.0537 | 0.0020 | 0.5182  | 0.0184 | 0.0701 | 0.0008 | 367  | 53  | 424  | 12 | 437  | 5  | 0.97 | 437        | 5  |
|                                                                                                                                                     | Shg-4-84  | 210 | 232 | 0.90 | 0.0525 | 0.0023 | 0.4034  | 0.0166 | 0.0559 | 0.0006 | 306  | 128 | 344  | 12 | 350  | 3  | 0.98 | 350        | 3  |
|                                                                                                                                                     | Shg-4-85  | 116 | 194 | 0.60 | 0.0548 | 0.0022 | 0.5565  | 0.0212 | 0.0736 | 0.0008 | 467  | 89  | 449  | 14 | 458  | 5  | 0.98 | 458        | 5  |
|                                                                                                                                                     | Shg-4-86  | 99  | 129 | 0.77 | 0.0594 | 0.0030 | 0.5082  | 0.0246 | 0.0624 | 0.0009 | 589  | 105 | 417  | 17 | 390  | 5  | 0.93 | 390        | 5  |
|                                                                                                                                                     | Shg-4-87  | 115 | 77  | 1.49 | 0.1559 | 0.0041 | 10.2063 | 0.2578 | 0.4720 | 0.0048 | 2413 | 46  | 2454 | 23 | 2492 | 21 | 0.98 | 2413       | 46 |
|                                                                                                                                                     | Shg-4-88  | 289 | 360 | 0.80 | 0.0554 | 0.0019 | 0.4991  | 0.0166 | 0.0651 | 0.0008 | 428  | 78  | 411  | 11 | 407  | 5  | 0.98 | 407        | 5  |
|                                                                                                                                                     | Shg-4-89  | 133 | 191 | 0.70 | 0.0725 | 0.0020 | 1.7908  | 0.0475 | 0.1785 | 0.0018 | 1011 | 57  | 1042 | 17 | 1059 | 10 | 0.98 | 1011       | 57 |
|                                                                                                                                                     | Shg-4-90  | 646 | 756 | 0.85 | 0.0542 | 0.0013 | 0.5348  | 0.0132 | 0.0710 | 0.0006 | 389  | 56  | 435  | 9  | 442  | 3  | 0.98 | 442        | 3  |
|                                                                                                                                                     | Shg-4-91  | 334 | 304 | 1.10 | 0.0565 | 0.0021 | 0.5709  | 0.0205 | 0.0730 | 0.0007 | 478  | 81  | 459  | 13 | 454  | 4  | 0.99 | 454        | 4  |
|                                                                                                                                                     | Shg-4-92  | 191 | 354 | 0.54 | 0.0555 | 0.0018 | 0.5189  | 0.0166 | 0.0675 | 0.0007 | 435  | 69  | 424  | 11 | 421  | 4  | 0.99 | 421        | 4  |
|                                                                                                                                                     | Shg-4-93  | 274 | 345 | 0.80 | 0.0567 | 0.0018 | 0.5155  | 0.0160 | 0.0657 | 0.0007 | 480  | 72  | 422  | 11 | 410  | 4  | 0.97 | 410        | 4  |
|                                                                                                                                                     | Shg-4-94  | 71  | 107 | 0.66 | 0.0660 | 0.0028 | 1.1692  | 0.0475 | 0.1290 | 0.0017 | 806  | 85  | 786  | 22 | 782  | 10 | 0.99 | 782        | 10 |
|                                                                                                                                                     | Shg-4-95  | 124 | 94  | 1.32 | 0.0649 | 0.0029 | 1.0954  | 0.0487 | 0.1225 | 0.0015 | 769  | 94  | 751  | 24 | 745  | 8  | 0.99 | 745        | 8  |
|                                                                                                                                                     | Shg-4-96  | 112 | 240 | 0.47 | 0.0557 | 0.0019 | 0.5286  | 0.0171 | 0.0689 | 0.0008 | 443  | 76  | 431  | 11 | 430  | 5  | 0.99 | 430        | 5  |
|                                                                                                                                                     | Shg-4-97  | 65  | 114 | 0.57 | 0.0598 | 0.0029 | 0.6081  | 0.0271 | 0.0743 | 0.0011 | 594  | 104 | 482  | 17 | 462  | 7  | 0.95 | 462        | 7  |
|                                                                                                                                                     | Shg-4-98  | 197 | 227 | 0.87 | 0.0566 | 0.0021 | 0.5450  | 0.0190 | 0.0699 | 0.0009 | 476  | 80  | 442  | 12 | 436  | 5  | 0.98 | 436        | 5  |
|                                                                                                                                                     | Shg-4-99  | 206 | 305 | 0.68 | 0.0558 | 0.0022 | 0.5148  | 0.0200 | 0.0666 | 0.0008 | 443  | 89  | 422  | 13 | 415  | 5  | 0.98 | 415        | 5  |
|                                                                                                                                                     | Shg-4-100 | 168 | 201 | 0.83 | 0.0582 | 0.0026 | 0.5479  | 0.0238 | 0.0679 | 0.0008 | 600  | 98  | 444  | 16 | 423  | 5  | 0.95 | 423        | 5  |
|                                                                                                                                                     | Shg-4-101 | 293 | 419 | 0.70 | 0.0532 | 0.0019 | 0.4126  | 0.0147 | 0.0558 | 0.0006 | 339  | 81  | 351  | 11 | 350  | 4  | 0.99 | 350        | 4  |
|                                                                                                                                                     | Shg-4-102 | 161 | 264 | 0.61 | 0.0576 | 0.0021 | 0.5488  | 0.0200 | 0.0686 | 0.0008 | 517  | 78  | 444  | 13 | 428  | 5  | 0.96 | 428        | 5  |
|                                                                                                                                                     | Shg-4-103 | 95  | 125 | 0.76 | 0.0603 | 0.0028 | 0.6196  | 0.0269 | 0.0751 | 0.0011 | 613  | 100 | 490  | 17 | 467  | 6  | 0.95 | 467        | 6  |
|                                                                                                                                                     | Shg-4-104 | 420 | 428 | 0.98 | 0.0555 | 0.0018 | 0.5159  | 0.0179 | 0.0669 | 0.0008 | 432  | 68  | 422  | 12 | 417  | 5  | 0.98 | 417        | 5  |
|                                                                                                                                                     | Shg-4-105 | 153 | 326 | 0.47 | 0.0574 | 0.0020 | 0.5606  | 0.0201 | 0.0704 | 0.0008 | 506  | 78  | 452  | 13 | 439  | 5  | 0.97 | 439        | 5  |
|                                                                                                                                                     | Shg-4-106 | 188 | 296 | 0.63 | 0.0538 | 0.0019 | 0.4983  | 0.0173 | 0.0669 | 0.0007 | 365  | 81  | 411  | 12 | 417  | 4  | 0.98 | 417        | 4  |
| Sample Shg-13, conglomerate, Late Carboniferous Kegouqinshan Formation in the Tekesi city of southern Yili basin, (Huang et al. 2018, GSA Bulletin) |           |     |     |      |        |        |         |        |        |        |      |     |      |    |      |    |      |            |    |
|                                                                                                                                                     | Shg-13-01 | 19  | 24  | 0.76 | 0.0849 | 0.0067 | 0.7444  | 0.0545 | 0.0657 | 0.0018 | 1322 | 154 | 565  | 32 | 410  | 11 | 0.68 | Discordant |    |
|                                                                                                                                                     | Shg-13-02 | 31  | 43  | 0.73 | 0.0689 | 0.0057 | 0.5976  | 0.0433 | 0.0675 | 0.0016 | 895  | 170 | 476  | 28 | 421  | 10 | 0.87 | Discordant |    |
|                                                                                                                                                     | Shg-13-03 | 34  | 61  | 0.57 | 0.0600 | 0.0038 | 0.5517  | 0.0323 | 0.0687 | 0.0012 | 611  | 144 | 446  | 21 | 428  | 7  | 0.95 | 428        | 7  |
|                                                                                                                                                     | Shg-13-04 | 9   | 19  | 0.46 | 0.0809 | 0.0071 | 0.7141  | 0.0613 | 0.0683 | 0.0023 | 1220 | 172 | 547  | 36 | 426  | 14 | 0.75 | Discordant |    |
|                                                                                                                                                     | Shg-13-05 | 31  | 74  | 0.42 | 0.0579 | 0.0040 | 0.5501  | 0.0356 | 0.0695 | 0.0012 | 528  | 152 | 445  | 23 | 433  | 7  | 0.97 | 433        | 7  |
|                                                                                                                                                     | Shg-13-06 | 26  | 77  | 0.34 | 0.0517 | 0.0030 | 0.4985  | 0.0276 | 0.0706 | 0.0011 | 272  | 99  | 411  | 19 | 440  | 6  | 0.93 | 440        | 6  |
|                                                                                                                                                     | Shg-13-07 | 69  | 92  | 0.75 | 0.0575 | 0.0028 | 0.5538  | 0.0272 | 0.0695 | 0.0010 | 522  | 75  | 447  | 18 | 433  | 6  | 0.96 | 433        | 6  |
|                                                                                                                                                     | Shg-13-08 | 36  | 72  | 0.50 | 0.0618 | 0.0040 | 0.6215  | 0.0373 | 0.0743 | 0.0013 | 733  | 338 | 491  | 23 | 462  | 8  | 0.93 | 462        | 8  |
|                                                                                                                                                     | Shg-13-09 | 99  | 114 | 0.87 | 0.0581 | 0.0032 | 0.5523  | 0.0287 | 0.0688 | 0.0009 | 600  | 120 | 446  | 19 | 429  | 6  | 0.96 | 429        | 6  |
|                                                                                                                                                     | Shg-13-10 | 20  | 29  | 0.68 | 0.0778 | 0.0114 | 0.7320  | 0.1068 | 0.0719 | 0.0021 | 1143 | 296 | 558  | 63 | 448  | 12 | 0.78 | Discordant |    |
|                                                                                                                                                     | Shg-13-11 | 68  | 83  | 0.81 | 0.0520 | 0.0028 | 0.5030  | 0.0262 | 0.0708 | 0.0012 | 283  | 156 | 414  | 18 | 441  | 7  | 0.93 | 441        | 7  |
|                                                                                                                                                     | Shg-13-12 | 29  | 46  | 0.61 | 0.0572 | 0.0043 | 0.5707  | 0.0403 | 0.0736 | 0.0019 | 502  | 165 | 458  | 26 | 458  | 11 | 0.99 | 458        | 11 |
|                                                                                                                                                     | Shg-13-13 | 61  | 76  | 0.80 | 0.0631 | 0.0043 | 0.5931  | 0.0352 | 0.0695 | 0.0011 | 722  | 144 | 473  | 22 | 433  | 7  | 0.91 | 433        | 7  |
|                                                                                                                                                     | Shg-13-14 | 5   | 13  | 0.42 | 0.1483 | 0.0213 | 1.2579  | 0.1457 | 0.0748 | 0.0064 | 2328 | 248 | 827  | 66 | 465  | 39 | 0.43 | Discordant |    |
|                                                                                                                                                     | Shg-13-15 | 26  | 49  | 0.53 | 0.0635 | 0.0047 | 0.6235  | 0.0469 | 0.0718 | 0.0014 | 724  | 155 | 492  | 29 | 447  | 8  | 0.90 | 447        | 8  |
|                                                                                                                                                     | Shg-13-16 | 21  | 29  | 0.74 | 0.0758 | 0.0087 | 0.6331  | 0.0539 | 0.0683 | 0.0018 | 1089 | 232 | 498  | 34 | 426  | 11 | 0.84 | Discordant |    |
|                                                                                                                                                     | Shg-13-17 | 31  | 89  | 0.34 | 0.0534 | 0.0034 | 0.5130  | 0.0305 | 0.0707 | 0.0011 | 343  | 143 | 420  | 20 | 441  | 6  | 0.95 | 441        | 6  |
|                                                                                                                                                     | Shg-13-18 | 18  | 52  | 0.35 | 0.0592 | 0.0041 | 0.5453  | 0.0334 | 0.0687 | 0.0014 | 576  | 150 | 442  | 22 | 428  | 8  | 0.96 | 428        | 8  |
|                                                                                                                                                     | Shg-13-19 | 9   | 20  | 0.46 | 0.0974 | 0.0089 | 0.8182  | 0.0635 | 0.0688 | 0.0021 | 1576 | 171 | 607  | 35 | 429  | 13 | 0.65 | Discordant |    |
|                                                                                                                                                     | Shg-13-20 | 28  | 52  | 0.55 | 0.0622 | 0.0045 | 0.6009  | 0.0419 | 0.0714 | 0.0013 | 680  | 156 | 478  | 27 | 445  | 8  | 0.92 | 445        | 8  |
| Sample Jg-1, conglomerate, Middle Permian Xiaoshansayi Formation in the Nileke city of southern Yili basin, (Huang et al. 2018, GSA Bulletin)       |           |     |     |      |        |        |         |        |        |        |      |     |      |    |      |    |      |            |    |
|                                                                                                                                                     | Jg-1-01   | 46  | 94  | 0.49 | 0.0591 | 0.0049 | 0.3405  | 0.0268 | 0.0435 | 0.0011 | 572  | 175 | 298  | 20 | 275  | 7  | 0.91 | 275        | 7  |
|                                                                                                                                                     | Jg-1-02   | 101 | 139 | 0.73 | 0.0526 | 0.0033 | 0.3027  | 0.0178 | 0.0432 | 0.0009 | 322  | 147 | 269  | 14 | 273  | 5  | 0.98 | 273        | 5  |
|                                                                                                                                                     | Jg-1-03   | 104 | 184 | 0.57 | 0.0564 | 0.0034 | 0.3379  | 0.0191 | 0.0440 | 0.0008 | 465  | 133 | 296  | 14 | 277  | 5  | 0.93 | 277        | 5  |
|                                                                                                                                                     | Jg-1-04   | 172 | 220 | 0.78 | 0.0577 | 0.0027 | 0.3485  | 0.0166 | 0.0435 | 0.0007 | 517  | 102 | 304  | 13 | 275  | 4  | 0.90 | 275        | 4  |
|                                                                                                                                                     | Jg-1-05   | 21  | 48  | 0.43 | 0.0760 |        |         |        |        |        |      |     |      |    |      |    |      |            |    |

|                                                                                                                                              |     |     |      |        |        |        |        |        |        |      |     |      |    |      |    |      |      |    |
|----------------------------------------------------------------------------------------------------------------------------------------------|-----|-----|------|--------|--------|--------|--------|--------|--------|------|-----|------|----|------|----|------|------|----|
| Jq-1-66                                                                                                                                      | 28  | 57  | 0.49 | 0.0747 | 0.0059 | 0.4231 | 0.0341 | 0.0424 | 0.0009 | 1061 | 156 | 358  | 24 | 268  | 6  | 0.71 | 268  | 6  |
| Jg-1-67                                                                                                                                      | 82  | 155 | 0.53 | 0.0497 | 0.0030 | 0.3001 | 0.0178 | 0.0434 | 0.0007 | 183  | 142 | 266  | 14 | 274  | 4  | 0.97 | 274  | 4  |
| Jg-1-68                                                                                                                                      | 70  | 89  | 0.79 | 0.0607 | 0.0044 | 0.3525 | 0.0232 | 0.0440 | 0.0009 | 632  | 162 | 307  | 17 | 278  | 6  | 0.90 | 278  | 6  |
| Jg-1-69                                                                                                                                      | 96  | 180 | 0.54 | 0.0526 | 0.0027 | 0.3158 | 0.0153 | 0.0440 | 0.0007 | 309  | 121 | 279  | 12 | 278  | 4  | 0.99 | 278  | 4  |
| Jg-1-70                                                                                                                                      | 47  | 64  | 0.74 | 0.0861 | 0.0063 | 0.5367 | 0.0443 | 0.0437 | 0.0012 | 1339 | 143 | 436  | 29 | 276  | 7  | 0.54 | 276  | 7  |
| Jg-1-71                                                                                                                                      | 125 | 203 | 0.61 | 0.0565 | 0.0026 | 0.3370 | 0.0152 | 0.0433 | 0.0007 | 472  | 102 | 295  | 12 | 273  | 4  | 0.92 | 273  | 4  |
| Jg-1-72                                                                                                                                      | 43  | 82  | 0.52 | 0.0586 | 0.0040 | 0.3539 | 0.0217 | 0.0455 | 0.0010 | 554  | 149 | 308  | 16 | 287  | 6  | 0.93 | 287  | 6  |
| Jg-1-73                                                                                                                                      | 94  | 168 | 0.56 | 0.0536 | 0.0026 | 0.3207 | 0.0144 | 0.0441 | 0.0008 | 354  | 109 | 282  | 11 | 278  | 5  | 0.98 | 278  | 5  |
| Jg-1-74                                                                                                                                      | 43  | 77  | 0.56 | 0.0638 | 0.0043 | 0.3756 | 0.0241 | 0.0436 | 0.0009 | 744  | 144 | 324  | 18 | 275  | 6  | 0.83 | 275  | 6  |
| Jg-1-75                                                                                                                                      | 116 | 203 | 0.57 | 0.0577 | 0.0031 | 0.3401 | 0.0163 | 0.0436 | 0.0007 | 520  | 119 | 297  | 12 | 275  | 4  | 0.92 | 275  | 4  |
| Jg-1-76                                                                                                                                      | 111 | 184 | 0.60 | 0.0548 | 0.0032 | 0.3269 | 0.0177 | 0.0440 | 0.0007 | 406  | 99  | 287  | 14 | 278  | 5  | 0.96 | 278  | 5  |
| Jg-1-77                                                                                                                                      | 111 | 218 | 0.51 | 0.0575 | 0.0026 | 0.3503 | 0.0149 | 0.0443 | 0.0007 | 522  | 98  | 305  | 11 | 279  | 4  | 0.91 | 279  | 4  |
| Sample Pxx-2, conglomerate, Middle Permian Tamuqisayi Formation in the Nileke city of southern Yili basin, (Huang et al. 2018, GSA Bulletin) |     |     |      |        |        |        |        |        |        |      |     |      |    |      |    |      |      |    |
| Pxx-2-01                                                                                                                                     | 308 | 343 | 0.90 | 0.0578 | 0.0019 | 0.5793 | 0.0189 | 0.0724 | 0.0011 | 520  | 69  | 464  | 12 | 451  | 7  | 0.97 | 451  | 7  |
| Pxx-2-02                                                                                                                                     | 156 | 336 | 0.46 | 0.0534 | 0.0019 | 0.4971 | 0.0178 | 0.0669 | 0.0011 | 346  | 78  | 410  | 12 | 417  | 7  | 0.98 | 417  | 7  |
| Pxx-2-03                                                                                                                                     | 98  | 125 | 0.78 | 0.0501 | 0.0030 | 0.3417 | 0.0199 | 0.0503 | 0.0010 | 211  | 145 | 298  | 15 | 317  | 6  | 0.94 | 317  | 6  |
| Pxx-2-04                                                                                                                                     | 185 | 265 | 0.70 | 0.0558 | 0.0022 | 0.3820 | 0.0143 | 0.0499 | 0.0008 | 443  | 89  | 329  | 11 | 314  | 5  | 0.95 | 314  | 5  |
| Pxx-2-05                                                                                                                                     | 334 | 582 | 0.57 | 0.0578 | 0.0017 | 0.4953 | 0.0149 | 0.0619 | 0.0010 | 520  | 63  | 409  | 10 | 387  | 6  | 0.94 | 387  | 6  |
| Pxx-2-06                                                                                                                                     | 414 | 738 | 0.56 | 0.0512 | 0.0016 | 0.3342 | 0.0105 | 0.0472 | 0.0007 | 256  | 70  | 293  | 8  | 297  | 4  | 0.98 | 297  | 4  |
| Pxx-2-07                                                                                                                                     | 167 | 213 | 0.78 | 0.0548 | 0.0028 | 0.3882 | 0.0192 | 0.0515 | 0.0010 | 467  | 118 | 333  | 14 | 324  | 6  | 0.97 | 324  | 6  |
| Pxx-2-08                                                                                                                                     | 90  | 143 | 0.63 | 0.0592 | 0.0040 | 0.3679 | 0.0203 | 0.0471 | 0.0010 | 576  | 148 | 318  | 15 | 297  | 6  | 0.93 | 297  | 6  |
| Pxx-2-09                                                                                                                                     | 86  | 126 | 0.68 | 0.0592 | 0.0032 | 0.5489 | 0.0284 | 0.0681 | 0.0013 | 576  | 117 | 444  | 19 | 425  | 8  | 0.95 | 425  | 8  |
| Pxx-2-10                                                                                                                                     | 316 | 316 | 1.00 | 0.0525 | 0.0025 | 0.3258 | 0.0148 | 0.0452 | 0.0007 | 306  | 109 | 286  | 11 | 285  | 5  | 0.99 | 285  | 5  |
| Pxx-2-11                                                                                                                                     | 147 | 188 | 0.78 | 0.0536 | 0.0025 | 0.4944 | 0.0242 | 0.0673 | 0.0014 | 354  | 99  | 408  | 16 | 420  | 9  | 0.97 | 420  | 9  |
| Pxx-2-12                                                                                                                                     | 168 | 244 | 0.69 | 0.0493 | 0.0024 | 0.3457 | 0.0168 | 0.0508 | 0.0009 | 165  | 108 | 301  | 13 | 320  | 6  | 0.94 | 320  | 6  |
| Pxx-2-13                                                                                                                                     | 98  | 179 | 0.55 | 0.1535 | 0.0039 | 8.1744 | 0.2216 | 0.3854 | 0.0061 | 2387 | 43  | 2251 | 25 | 2102 | 29 | 0.93 | 2387 | 43 |
| Pxx-2-14                                                                                                                                     | 181 | 304 | 0.60 | 0.0548 | 0.0023 | 0.3402 | 0.0137 | 0.0456 | 0.0008 | 467  | 97  | 297  | 10 | 287  | 5  | 0.96 | 287  | 5  |
| Pxx-2-15                                                                                                                                     | 137 | 247 | 0.56 | 0.0523 | 0.0026 | 0.3378 | 0.0157 | 0.0474 | 0.0008 | 298  | 113 | 296  | 12 | 299  | 5  | 0.98 | 299  | 5  |
| Pxx-2-16                                                                                                                                     | 121 | 234 | 0.52 | 0.0607 | 0.0024 | 0.6281 | 0.0264 | 0.0747 | 0.0013 | 629  | 90  | 495  | 16 | 464  | 8  | 0.93 | 464  | 8  |
| Pxx-2-17                                                                                                                                     | 141 | 258 | 0.54 | 0.0576 | 0.0024 | 0.5255 | 0.0204 | 0.0668 | 0.0011 | 517  | 93  | 429  | 14 | 417  | 7  | 0.97 | 417  | 7  |
| Pxx-2-18                                                                                                                                     | 122 | 213 | 0.57 | 0.0547 | 0.0023 | 0.5470 | 0.0233 | 0.0730 | 0.0014 | 467  | 99  | 443  | 15 | 454  | 9  | 0.97 | 454  | 9  |
| Pxx-2-19                                                                                                                                     | 167 | 195 | 0.85 | 0.0506 | 0.0026 | 0.3437 | 0.0188 | 0.0486 | 0.0008 | 220  | 123 | 300  | 14 | 306  | 5  | 0.97 | 306  | 5  |
| Pxx-2-20                                                                                                                                     | 172 | 288 | 0.60 | 0.0525 | 0.0022 | 0.3478 | 0.0141 | 0.0482 | 0.0008 | 309  | 129 | 303  | 11 | 304  | 5  | 0.99 | 304  | 5  |
| Pxx-2-21                                                                                                                                     | 341 | 380 | 0.90 | 0.0550 | 0.0022 | 0.3641 | 0.0146 | 0.0475 | 0.0007 | 413  | 89  | 315  | 11 | 299  | 4  | 0.94 | 299  | 4  |
| Pxx-2-22                                                                                                                                     | 57  | 85  | 0.67 | 0.0589 | 0.0038 | 0.3930 | 0.0266 | 0.0487 | 0.0012 | 565  | 143 | 337  | 19 | 307  | 7  | 0.90 | 307  | 7  |
| Pxx-2-23                                                                                                                                     | 173 | 181 | 0.96 | 0.0586 | 0.0029 | 0.3714 | 0.0186 | 0.0460 | 0.0009 | 554  | 107 | 321  | 14 | 290  | 6  | 0.90 | 290  | 6  |
| Pxx-2-24                                                                                                                                     | 144 | 192 | 0.75 | 0.0685 | 0.0034 | 0.4549 | 0.0243 | 0.0477 | 0.0008 | 883  | 104 | 381  | 17 | 300  | 5  | 0.76 | 300  | 5  |
| Pxx-2-25                                                                                                                                     | 310 | 311 | 1.00 | 0.0558 | 0.0022 | 0.5074 | 0.0201 | 0.0660 | 0.0010 | 443  | 89  | 417  | 14 | 412  | 6  | 0.98 | 412  | 6  |
| Pxx-2-26                                                                                                                                     | 306 | 496 | 0.62 | 0.0581 | 0.0022 | 0.4241 | 0.0174 | 0.0524 | 0.0008 | 600  | 81  | 359  | 12 | 329  | 5  | 0.91 | 329  | 5  |
| Pxx-2-27                                                                                                                                     | 92  | 117 | 0.79 | 0.1897 | 0.0108 | 1.5667 | 0.1038 | 0.0563 | 0.0015 | 2739 | 94  | 957  | 41 | 353  | 9  | 0.07 | 353  | 9  |
| Pxx-2-28                                                                                                                                     | 167 | 244 | 0.68 | 0.0555 | 0.0021 | 0.5768 | 0.0227 | 0.0753 | 0.0012 | 432  | 88  | 462  | 15 | 468  | 7  | 0.98 | 468  | 7  |
| Pxx-2-29                                                                                                                                     | 615 | 556 | 1.11 | 0.0548 | 0.0019 | 0.3535 | 0.0125 | 0.0467 | 0.0006 | 467  | 78  | 307  | 9  | 294  | 4  | 0.95 | 294  | 4  |
| Pxx-2-30                                                                                                                                     | 89  | 95  | 0.94 | 0.0584 | 0.0041 | 0.3645 | 0.0247 | 0.0470 | 0.0011 | 546  | 158 | 316  | 18 | 296  | 7  | 0.93 | 296  | 7  |
| Pxx-2-31                                                                                                                                     | 88  | 82  | 1.07 | 0.0568 | 0.0049 | 0.3436 | 0.0255 | 0.0471 | 0.0011 | 487  | 191 | 300  | 19 | 296  | 7  | 0.98 | 296  | 7  |
| Pxx-2-32                                                                                                                                     | 149 | 299 | 0.50 | 0.0475 | 0.0021 | 0.2844 | 0.0130 | 0.0428 | 0.0007 | 76   | 113 | 254  | 10 | 270  | 4  | 0.93 | 270  | 4  |
| Pxx-2-33                                                                                                                                     | 164 | 227 | 0.72 | 0.0542 | 0.0029 | 0.3435 | 0.0193 | 0.0455 | 0.0010 | 389  | 120 | 300  | 15 | 287  | 6  | 0.95 | 287  | 6  |
| Pxx-2-34                                                                                                                                     | 192 | 248 | 0.78 | 0.0551 | 0.0023 | 0.4690 | 0.0178 | 0.0622 | 0.0010 | 413  | 93  | 391  | 12 | 389  | 6  | 0.99 | 389  | 6  |
| Pxx-2-35                                                                                                                                     | 208 | 219 | 0.95 | 0.0531 | 0.0029 | 0.3414 | 0.0180 | 0.0465 | 0.0008 | 345  | 120 | 298  | 14 | 293  | 5  | 0.98 | 293  | 5  |
| Pxx-2-36                                                                                                                                     | 242 | 320 | 0.76 | 0.0528 | 0.0023 | 0.3486 | 0.0148 | 0.0477 | 0.0008 | 320  | 96  | 304  | 11 | 301  | 5  | 0.98 | 301  | 5  |
| Pxx-2-37                                                                                                                                     | 102 | 197 | 0.52 | 0.0506 | 0.0030 | 0.3521 | 0.0192 | 0.0513 | 0.0010 | 220  | 137 | 306  | 14 | 322  | 6  | 0.94 | 322  | 6  |
| Pxx-2-38                                                                                                                                     | 261 | 519 | 0.50 | 0.0530 | 0.0019 | 0.5450 | 0.0198 | 0.0737 | 0.0011 | 332  | 77  | 442  | 13 | 458  | 7  | 0.96 | 458  | 7  |
| Pxx-2-39                                                                                                                                     | 204 | 439 | 0.46 | 0.0481 | 0.0020 | 0.3455 | 0.0141 | 0.0516 | 0.0007 | 106  | 103 | 301  | 11 | 325  | 4  | 0.92 | 325  | 4  |
| Pxx-2-40                                                                                                                                     | 195 | 339 | 0.58 | 0.0491 | 0.0019 | 0.3527 | 0.0132 | 0.0521 | 0.0008 | 154  | 93  | 307  | 10 | 327  | 5  | 0.93 | 327  | 5  |
| Pxx-2-41                                                                                                                                     | 218 | 182 | 1.20 | 0.0548 | 0.0034 | 0.3534 | 0.0215 | 0.0471 | 0.0008 | 406  | 141 | 307  | 16 | 297  | 5  | 0.96 | 297  | 5  |
| Pxx-2-42                                                                                                                                     | 93  | 148 | 0.63 | 0.0537 | 0.0028 | 0.4717 | 0.0237 | 0.0645 | 0.0011 | 367  | 121 | 392  | 16 | 403  | 7  | 0.97 | 403  | 7  |
| Pxx-2-43                                                                                                                                     | 238 | 184 | 1.29 | 0.0520 | 0.0024 | 0.3810 | 0.0178 | 0.0537 | 0.0009 | 287  | 107 | 328  | 13 | 337  | 5  | 0.97 | 337  | 5  |
| Pxx-2-44                                                                                                                                     | 103 | 168 | 0.61 | 0.0556 | 0.0025 | 0.4632 | 0.0217 | 0.0600 | 0.0009 | 435  | 100 | 387  | 15 | 376  | 5  | 0.97 | 376  | 5  |
| Pxx-2-45                                                                                                                                     | 168 | 271 | 0.62 | 0.0541 | 0.0021 | 0.4213 | 0.0158 | 0.0571 | 0.0009 | 376  | 87  | 357  | 11 | 358  | 6  | 0.99 | 358  | 6  |
| Pxx-2-46                                                                                                                                     | 111 | 121 | 0.92 | 0.0495 | 0.0030 | 0.3433 | 0.0211 | 0.0508 | 0.0010 | 172  | 144 | 300  | 16 | 319  | 6  | 0.93 | 319  | 6  |
| Pxx-2-47                                                                                                                                     | 121 | 242 | 0.50 | 0.0549 | 0.0026 | 0.3816 | 0.0175 | 0.0508 | 0.0008 | 406  | 107 | 328  | 13 | 319  | 5  | 0.97 | 319  | 5  |
| Pxx-2-48                                                                                                                                     | 184 | 386 | 0.48 | 0.0548 | 0.0022 | 0.3900 | 0.0154 | 0.0514 | 0.0008 | 406  | 95  | 334  | 11 | 323  | 5  | 0.96 | 323  | 5  |
| Pxx-2-49                                                                                                                                     | 113 | 178 | 0.64 | 0.0566 | 0.0029 | 0.4989 | 0.0243 | 0.0643 | 0.0011 | 476  | 113 | 411  | 16 | 402  | 7  | 0.97 | 402  | 7  |
| Pxx-2-50                                                                                                                                     | 204 | 265 | 0.77 | 0.0558 | 0.0022 | 0.3620 | 0.0141 | 0.0474 | 0.0008 | 443  | 89  | 314  | 11 | 299  | 5  | 0.95 | 299  | 5  |
| Pxx-2-51                                                                                                                                     | 84  | 118 | 0.71 | 0.0538 | 0.0032 | 0.3674 | 0.0210 | 0.0508 | 0.0011 | 361  | 140 | 318  | 16 | 319  | 7  | 0.99 | 319  | 7  |
| Pxx-2-52                                                                                                                                     | 75  | 85  | 0.88 | 0.0588 | 0.0042 | 0.3781 | 0.0250 | 0.0473 | 0.0011 | 561  | 156 | 326  | 18 | 298  | 6  | 0.91 | 298  | 6  |
| Pxx-2-53                                                                                                                                     | 155 | 172 | 0.90 | 0.0553 | 0.0030 | 0.3376 | 0.0197 | 0.0437 | 0.0009 | 433  | 120 | 295  | 15 | 276  | 5  | 0.93 | 276  | 5  |
| Pxx-2-54                                                                                                                                     | 258 | 303 | 0.85 | 0.0540 | 0.0024 | 0.3553 | 0.0155 | 0.0475 | 0.0008 | 372  | 72  | 309  | 12 | 299  | 5  | 0.96 | 299  | 5  |
| Pxx-2-55                                                                                                                                     | 126 | 284 | 0.44 | 0.0565 | 0.0020 | 0.5400 | 0.0197 | 0.0684 | 0.0010 | 472  | 78  | 438  | 13 | 427  | 6  | 0.97 | 427  | 6  |
| Pxx-2-56                                                                                                                                     | 223 | 176 | 1.27 | 0.0542 | 0.0030 | 0.3530 | 0.0189 | 0.0476 | 0.0008 | 389  | 121 | 307  | 14 | 300  | 5  | 0.97 | 300  | 5  |
| Pxx-2-57                                                                                                                                     | 675 | 577 | 1.17 | 0.0500 | 0.0016 | 0.3325 | 0.0101 | 0.0478 | 0.0007 | 198  | 105 | 292  | 8  | 301  | 4  | 0.96 | 301  | 4  |
| Pxx-2-58                                                                                                                                     | 217 | 152 | 1.43 | 0.0517 | 0.0027 | 0.3347 | 0.0178 | 0.0468 | 0.0008 | 272  | 120 |      |    |      |    |      |      |    |



|                                                                                                                                              |     |      |      |        |        |         |        |        |        |      |     |      |    |      |    |      |      |    |
|----------------------------------------------------------------------------------------------------------------------------------------------|-----|------|------|--------|--------|---------|--------|--------|--------|------|-----|------|----|------|----|------|------|----|
| Pxq-3-22                                                                                                                                     | 65  | 115  | 0.56 | 0.0557 | 0.0032 | 0.3344  | 0.0185 | 0.0442 | 0.0009 | 439  | 130 | 293  | 14 | 279  | 6  | 0.95 | 279  | 6  |
| Pxg-3-23                                                                                                                                     | 83  | 131  | 0.64 | 0.0566 | 0.0037 | 0.3295  | 0.0207 | 0.0429 | 0.0008 | 476  | 143 | 289  | 16 | 271  | 5  | 0.93 | 271  | 5  |
| Pxg-3-24                                                                                                                                     | 110 | 167  | 0.66 | 0.0536 | 0.0030 | 0.3321  | 0.0189 | 0.0450 | 0.0009 | 354  | 121 | 291  | 14 | 283  | 5  | 0.97 | 283  | 5  |
| Sample Px-8, conglomerate, Middle Permian Tamuqisayi Formation in the Nileke city of southern Yili basin, (Huang et al. 2018, GSA Bulletin)  |     |      |      |        |        |         |        |        |        |      |     |      |    |      |    |      |      |    |
| Px-8-01                                                                                                                                      | 131 | 289  | 0.45 | 0.0513 | 0.0020 | 0.3124  | 0.0128 | 0.0437 | 0.0007 | 254  | 87  | 276  | 10 | 275  | 4  | 0.99 | 275  | 4  |
| Px-8-02                                                                                                                                      | 89  | 94   | 0.94 | 0.0535 | 0.0033 | 0.3183  | 0.0199 | 0.0434 | 0.0008 | 350  | 136 | 281  | 15 | 274  | 5  | 0.97 | 274  | 5  |
| Px-8-03                                                                                                                                      | 64  | 150  | 0.43 | 0.0579 | 0.0032 | 0.3443  | 0.0200 | 0.0431 | 0.0008 | 528  | 88  | 300  | 15 | 272  | 5  | 0.90 | 272  | 5  |
| Px-8-04                                                                                                                                      | 124 | 548  | 0.23 | 0.0541 | 0.0016 | 0.4239  | 0.0128 | 0.0566 | 0.0008 | 376  | 67  | 359  | 9  | 355  | 5  | 0.98 | 355  | 5  |
| Px-8-05                                                                                                                                      | 359 | 482  | 0.74 | 0.0531 | 0.0019 | 0.3481  | 0.0130 | 0.0473 | 0.0007 | 332  | 77  | 303  | 10 | 298  | 4  | 0.98 | 298  | 4  |
| Px-8-06                                                                                                                                      | 66  | 109  | 0.60 | 0.0570 | 0.0030 | 0.4010  | 0.0211 | 0.0515 | 0.0010 | 500  | 117 | 342  | 15 | 324  | 6  | 0.94 | 324  | 6  |
| Px-8-07                                                                                                                                      | 113 | 271  | 0.42 | 0.0540 | 0.0022 | 0.3252  | 0.0133 | 0.0437 | 0.0006 | 369  | 94  | 286  | 10 | 276  | 4  | 0.96 | 276  | 4  |
| Px-8-08                                                                                                                                      | 131 | 168  | 0.78 | 0.0561 | 0.0028 | 0.3712  | 0.0187 | 0.0480 | 0.0009 | 457  | 109 | 321  | 14 | 302  | 5  | 0.94 | 302  | 5  |
| Px-8-09                                                                                                                                      | 168 | 482  | 0.35 | 0.1679 | 0.0045 | 1.1927  | 0.0302 | 0.0515 | 0.0008 | 2539 | 45  | 797  | 14 | 324  | 5  | 0.15 | 324  | 5  |
| Px-8-10                                                                                                                                      | 203 | 145  | 1.40 | 0.0516 | 0.0028 | 0.3098  | 0.0163 | 0.0437 | 0.0008 | 333  | 122 | 274  | 13 | 276  | 5  | 0.99 | 276  | 5  |
| Px-8-11                                                                                                                                      | 131 | 174  | 0.75 | 0.0549 | 0.0031 | 0.3253  | 0.0172 | 0.0436 | 0.0008 | 406  | 128 | 286  | 13 | 275  | 5  | 0.96 | 275  | 5  |
| Px-8-12                                                                                                                                      | 450 | 675  | 0.67 | 0.0514 | 0.0015 | 0.3145  | 0.0096 | 0.0442 | 0.0006 | 257  | 69  | 278  | 7  | 279  | 4  | 0.99 | 279  | 4  |
| Px-8-13                                                                                                                                      | 139 | 180  | 0.78 | 0.0513 | 0.0024 | 0.3106  | 0.0147 | 0.0439 | 0.0008 | 254  | 109 | 275  | 11 | 277  | 5  | 0.99 | 277  | 5  |
| Px-8-14                                                                                                                                      | 177 | 204  | 0.87 | 0.0549 | 0.0023 | 0.3711  | 0.0156 | 0.0491 | 0.0007 | 409  | 96  | 320  | 12 | 309  | 5  | 0.96 | 309  | 5  |
| Px-8-15                                                                                                                                      | 51  | 116  | 0.44 | 0.0532 | 0.0032 | 0.3217  | 0.0199 | 0.0437 | 0.0008 | 339  | 142 | 283  | 15 | 275  | 5  | 0.97 | 275  | 5  |
| Sample Zpg-1, conglomerate, Middle Permian Tamuqisayi Formation in the Zhaosu city of southern Yili basin, (Huang et al. 2018, GSA Bulletin) |     |      |      |        |        |         |        |        |        |      |     |      |    |      |    |      |      |    |
| Zpg-1-01                                                                                                                                     | 106 | 155  | 0.68 | 0.0571 | 0.0029 | 0.6074  | 0.0307 | 0.0766 | 0.0013 | 498  | 108 | 482  | 19 | 476  | 8  | 0.98 | 476  | 8  |
| Zpg-1-02                                                                                                                                     | 579 | 687  | 0.84 | 0.0521 | 0.0017 | 0.3713  | 0.0125 | 0.0509 | 0.0008 | 287  | 76  | 321  | 9  | 320  | 5  | 0.99 | 320  | 5  |
| Zpg-1-03                                                                                                                                     | 96  | 566  | 0.17 | 0.0663 | 0.0018 | 1.2668  | 0.0432 | 0.1354 | 0.0028 | 817  | 53  | 831  | 19 | 819  | 16 | 0.98 | 819  | 16 |
| Zpg-1-04                                                                                                                                     | 351 | 795  | 0.44 | 0.0678 | 0.0018 | 1.3059  | 0.0386 | 0.1373 | 0.0022 | 861  | 56  | 848  | 17 | 829  | 13 | 0.97 | 829  | 13 |
| Zpg-1-05                                                                                                                                     | 155 | 202  | 0.77 | 0.0513 | 0.0035 | 0.3579  | 0.0247 | 0.0510 | 0.0010 | 257  | 153 | 311  | 18 | 321  | 6  | 0.96 | 321  | 6  |
| Zpg-1-06                                                                                                                                     | 163 | 339  | 0.48 | 0.0530 | 0.0025 | 0.4350  | 0.0204 | 0.0596 | 0.0013 | 328  | 107 | 367  | 14 | 373  | 8  | 0.98 | 373  | 8  |
| Zpg-1-07                                                                                                                                     | 208 | 378  | 0.55 | 0.0564 | 0.0023 | 0.5915  | 0.0232 | 0.0761 | 0.0013 | 478  | 97  | 472  | 15 | 473  | 8  | 0.99 | 473  | 8  |
| Zpg-1-08                                                                                                                                     | 245 | 333  | 0.74 | 0.0523 | 0.0028 | 0.3749  | 0.0184 | 0.0525 | 0.0009 | 298  | 122 | 323  | 14 | 330  | 6  | 0.98 | 330  | 6  |
| Zpg-1-09                                                                                                                                     | 355 | 577  | 0.61 | 0.0563 | 0.0022 | 0.3992  | 0.0153 | 0.0510 | 0.0008 | 465  | 87  | 341  | 11 | 321  | 5  | 0.93 | 321  | 5  |
| Zpg-1-10                                                                                                                                     | 379 | 655  | 0.58 | 0.0541 | 0.0019 | 0.3726  | 0.0131 | 0.0494 | 0.0008 | 376  | 78  | 322  | 10 | 311  | 5  | 0.96 | 311  | 5  |
| Zpg-1-11                                                                                                                                     | 103 | 214  | 0.48 | 0.0580 | 0.0029 | 0.5236  | 0.0261 | 0.0648 | 0.0012 | 532  | 109 | 428  | 17 | 404  | 7  | 0.94 | 404  | 7  |
| Zpg-1-12                                                                                                                                     | 614 | 530  | 1.16 | 0.0557 | 0.0025 | 0.3650  | 0.0163 | 0.0469 | 0.0008 | 439  | 131 | 316  | 12 | 295  | 5  | 0.93 | 295  | 5  |
| Zpg-1-13                                                                                                                                     | 129 | 274  | 0.47 | 0.0573 | 0.0028 | 0.5123  | 0.0246 | 0.0642 | 0.0010 | 502  | 106 | 420  | 16 | 401  | 6  | 0.95 | 401  | 6  |
| Zpg-1-14                                                                                                                                     | 186 | 368  | 0.51 | 0.0504 | 0.0024 | 0.3290  | 0.0162 | 0.0466 | 0.0008 | 217  | 111 | 289  | 12 | 294  | 5  | 0.98 | 294  | 5  |
| Zpg-1-15                                                                                                                                     | 106 | 276  | 0.38 | 0.0830 | 0.0021 | 2.6188  | 0.0746 | 0.2255 | 0.0038 | 1278 | 51  | 1306 | 21 | 1311 | 20 | 0.99 | 1278 | 51 |
| Zpg-1-16                                                                                                                                     | 324 | 442  | 0.73 | 0.0539 | 0.0023 | 0.4218  | 0.0178 | 0.0566 | 0.0010 | 365  | 98  | 357  | 13 | 355  | 6  | 0.99 | 355  | 6  |
| Zpg-1-17                                                                                                                                     | 679 | 1560 | 0.43 | 0.0525 | 0.0014 | 0.4334  | 0.0117 | 0.0593 | 0.0008 | 306  | 55  | 366  | 8  | 371  | 5  | 0.98 | 371  | 5  |
| Zpg-1-18                                                                                                                                     | 218 | 262  | 0.83 | 0.0569 | 0.0030 | 0.4135  | 0.0230 | 0.0524 | 0.0010 | 487  | 117 | 351  | 17 | 329  | 6  | 0.93 | 329  | 6  |
| Zpg-1-19                                                                                                                                     | 248 | 224  | 1.11 | 0.0514 | 0.0032 | 0.3627  | 0.0230 | 0.0518 | 0.0012 | 257  | 146 | 314  | 17 | 325  | 7  | 0.96 | 325  | 7  |
| Zpg-1-20                                                                                                                                     | 243 | 497  | 0.49 | 0.0515 | 0.0022 | 0.3646  | 0.0155 | 0.0510 | 0.0008 | 261  | 103 | 316  | 12 | 320  | 5  | 0.98 | 320  | 5  |
| Zpg-1-21                                                                                                                                     | 78  | 138  | 0.57 | 0.0580 | 0.0036 | 0.4057  | 0.0254 | 0.0506 | 0.0011 | 528  | 137 | 346  | 18 | 318  | 7  | 0.91 | 318  | 7  |
| Zpg-1-22                                                                                                                                     | 198 | 322  | 0.61 | 0.0512 | 0.0028 | 0.3470  | 0.0184 | 0.0492 | 0.0008 | 250  | 124 | 302  | 14 | 310  | 5  | 0.97 | 310  | 5  |
| Zpg-1-23                                                                                                                                     | 47  | 86   | 0.55 | 0.0599 | 0.0048 | 0.4494  | 0.0322 | 0.0576 | 0.0015 | 611  | 172 | 377  | 23 | 361  | 9  | 0.95 | 361  | 9  |
| Zpg-1-24                                                                                                                                     | 109 | 169  | 0.64 | 0.0502 | 0.0037 | 0.3680  | 0.0252 | 0.0555 | 0.0014 | 211  | 174 | 318  | 19 | 348  | 9  | 0.90 | 348  | 9  |
| Zpg-1-25                                                                                                                                     | 539 | 516  | 1.04 | 0.0513 | 0.0023 | 0.4132  | 0.0184 | 0.0581 | 0.0010 | 254  | 102 | 351  | 13 | 364  | 6  | 0.96 | 364  | 6  |
| Zpg-1-26                                                                                                                                     | 298 | 498  | 0.60 | 0.0520 | 0.0020 | 0.5316  | 0.0199 | 0.0735 | 0.0011 | 287  | 89  | 433  | 13 | 457  | 6  | 0.94 | 457  | 6  |
| Zpg-1-27                                                                                                                                     | 460 | 719  | 0.64 | 0.0503 | 0.0019 | 0.4971  | 0.0200 | 0.0707 | 0.0012 | 209  | 87  | 410  | 14 | 440  | 7  | 0.92 | 440  | 7  |
| Zpg-1-28                                                                                                                                     | 51  | 106  | 0.49 | 0.0600 | 0.0042 | 0.4385  | 0.0296 | 0.0538 | 0.0013 | 611  | 145 | 369  | 21 | 338  | 8  | 0.91 | 338  | 8  |
| Zpg-1-29                                                                                                                                     | 192 | 213  | 0.90 | 0.0516 | 0.0031 | 0.3736  | 0.0219 | 0.0526 | 0.0010 | 333  | 171 | 322  | 16 | 330  | 6  | 0.97 | 330  | 6  |
| Zpg-1-30                                                                                                                                     | 378 | 266  | 1.42 | 0.0589 | 0.0031 | 0.4272  | 0.0221 | 0.0524 | 0.0009 | 565  | 110 | 361  | 16 | 329  | 6  | 0.90 | 329  | 6  |
| Zpg-1-31                                                                                                                                     | 321 | 672  | 0.48 | 0.0554 | 0.0021 | 0.5636  | 0.0215 | 0.0730 | 0.0012 | 428  | 85  | 454  | 14 | 454  | 7  | 0.99 | 454  | 7  |
| Zpg-1-32                                                                                                                                     | 173 | 281  | 0.61 | 0.0554 | 0.0026 | 0.4388  | 0.0206 | 0.0569 | 0.0010 | 428  | 104 | 369  | 15 | 356  | 6  | 0.96 | 356  | 6  |
| Zpg-1-33                                                                                                                                     | 247 | 351  | 0.70 | 0.0546 | 0.0025 | 0.3819  | 0.0182 | 0.0503 | 0.0009 | 394  | 97  | 328  | 13 | 316  | 6  | 0.96 | 316  | 6  |
| Zpg-1-34                                                                                                                                     | 152 | 154  | 0.99 | 0.0715 | 0.0027 | 1.3811  | 0.0519 | 0.1393 | 0.0023 | 972  | 78  | 881  | 22 | 841  | 13 | 0.95 | 841  | 13 |
| Zpg-1-35                                                                                                                                     | 332 | 325  | 1.02 | 0.0506 | 0.0026 | 0.3678  | 0.0191 | 0.0528 | 0.0010 | 220  | 123 | 318  | 14 | 331  | 6  | 0.95 | 331  | 6  |
| Zpg-1-36                                                                                                                                     | 136 | 106  | 1.29 | 0.0632 | 0.0048 | 0.4763  | 0.0334 | 0.0586 | 0.0016 | 722  | 168 | 396  | 23 | 367  | 10 | 0.92 | 367  | 10 |
| Zpg-1-37                                                                                                                                     | 228 | 153  | 1.49 | 0.0533 | 0.0037 | 0.3559  | 0.0218 | 0.0498 | 0.0012 | 343  | 156 | 309  | 16 | 313  | 7  | 0.98 | 313  | 7  |
| Zpg-1-38                                                                                                                                     | 199 | 291  | 0.68 | 0.0572 | 0.0032 | 0.4346  | 0.0229 | 0.0556 | 0.0011 | 498  | 124 | 366  | 16 | 349  | 7  | 0.95 | 349  | 7  |
| Zpg-1-39                                                                                                                                     | 36  | 83   | 0.43 | 0.1654 | 0.0048 | 10.1594 | 0.2883 | 0.4418 | 0.0072 | 2522 | 48  | 2449 | 26 | 2359 | 32 | 0.96 | 2522 | 48 |
| Zpg-1-40                                                                                                                                     | 164 | 259  | 0.63 | 0.0546 | 0.0032 | 0.4373  | 0.0249 | 0.0582 | 0.0012 | 394  | 131 |      |    |      |    |      |      |    |



|          |     |      |      |        |        |         |        |        |        |      |     |      |    |      |    |      |            |    |
|----------|-----|------|------|--------|--------|---------|--------|--------|--------|------|-----|------|----|------|----|------|------------|----|
| Xsg-1-22 | 644 | 280  | 2.30 | 0.0627 | 0.0017 | 0.6046  | 0.0174 | 0.0694 | 0.0009 | 698  | 59  | 480  | 11 | 432  | 5  | 0.89 | Discordant |    |
| Xsg-1-23 | 77  | 145  | 0.53 | 0.0566 | 0.0024 | 0.4044  | 0.0162 | 0.0522 | 0.0009 | 476  | 88  | 345  | 12 | 328  | 5  | 0.95 | 328        | 5  |
| Xsg-1-24 | 107 | 298  | 0.36 | 0.1611 | 0.0027 | 9.9805  | 0.1750 | 0.4472 | 0.0050 | 2478 | 28  | 2433 | 16 | 2383 | 22 | 0.97 | 2478       | 28 |
| Xsg-1-25 | 207 | 244  | 0.85 | 0.0727 | 0.0060 | 0.5301  | 0.0325 | 0.0543 | 0.0009 | 1006 | 169 | 432  | 22 | 341  | 5  | 0.76 | Discordant |    |
| Xsg-1-26 | 108 | 125  | 0.86 | 0.0585 | 0.0028 | 0.4107  | 0.0193 | 0.0509 | 0.0008 | 550  | 104 | 349  | 14 | 320  | 5  | 0.91 | 320        | 5  |
| Xsg-1-27 | 626 | 546  | 1.15 | 0.0603 | 0.0015 | 0.4784  | 0.0111 | 0.0576 | 0.0007 | 613  | 49  | 397  | 8  | 361  | 4  | 0.90 | 361        | 4  |
| Xsg-1-28 | 205 | 138  | 1.48 | 0.0544 | 0.0024 | 0.3648  | 0.0169 | 0.0483 | 0.0008 | 391  | 100 | 316  | 13 | 304  | 5  | 0.96 | 304        | 5  |
| Xsg-1-29 | 116 | 160  | 0.73 | 0.0550 | 0.0020 | 0.5441  | 0.0209 | 0.0710 | 0.0011 | 413  | 83  | 441  | 14 | 442  | 7  | 0.99 | 442        | 7  |
| Xsg-1-30 | 100 | 151  | 0.66 | 0.0514 | 0.0024 | 0.3625  | 0.0171 | 0.0508 | 0.0009 | 261  | 109 | 314  | 13 | 319  | 6  | 0.98 | 319        | 6  |
| Xsg-1-31 | 428 | 509  | 0.84 | 0.0541 | 0.0015 | 0.5619  | 0.0168 | 0.0744 | 0.0010 | 372  | 63  | 453  | 11 | 463  | 6  | 0.97 | 463        | 6  |
| Xsg-1-32 | 135 | 236  | 0.57 | 0.0544 | 0.0021 | 0.4120  | 0.0164 | 0.0553 | 0.0015 | 387  | 87  | 350  | 12 | 347  | 9  | 0.99 | 347        | 9  |
| Xsg-1-33 | 135 | 245  | 0.55 | 0.0519 | 0.0019 | 0.3664  | 0.0135 | 0.0509 | 0.0007 | 280  | 83  | 317  | 10 | 320  | 4  | 0.98 | 320        | 4  |
| Xsg-1-34 | 84  | 212  | 0.39 | 0.0503 | 0.0020 | 0.3416  | 0.0136 | 0.0493 | 0.0008 | 209  | 88  | 298  | 10 | 310  | 5  | 0.96 | 310        | 5  |
| Xsg-1-35 | 148 | 296  | 0.50 | 0.0510 | 0.0016 | 0.3720  | 0.0121 | 0.0526 | 0.0008 | 239  | 72  | 321  | 9  | 331  | 5  | 0.97 | 331        | 5  |
| Xsg-1-36 | 118 | 68   | 1.73 | 0.0904 | 0.0025 | 3.1928  | 0.0998 | 0.2536 | 0.0041 | 1433 | 49  | 1455 | 24 | 1457 | 21 | 0.99 | 1433       | 49 |
| Xsg-1-37 | 211 | 273  | 0.77 | 0.0530 | 0.0016 | 0.5327  | 0.0177 | 0.0724 | 0.0012 | 328  | 69  | 434  | 12 | 450  | 7  | 0.96 | 450        | 7  |
| Xsg-1-38 | 442 | 1071 | 0.41 | 0.0563 | 0.0011 | 0.5248  | 0.0114 | 0.0672 | 0.0009 | 465  | 44  | 428  | 8  | 419  | 6  | 0.97 | 419        | 6  |
| Xsg-1-39 | 53  | 116  | 0.45 | 0.0664 | 0.0018 | 1.2839  | 0.0372 | 0.1395 | 0.0020 | 820  | 57  | 839  | 17 | 842  | 11 | 0.99 | 842        | 11 |
| Xsg-1-40 | 63  | 667  | 0.09 | 0.0943 | 0.0015 | 3.4278  | 0.0614 | 0.2619 | 0.0032 | 1514 | 30  | 1511 | 14 | 1499 | 16 | 0.99 | 1514       | 30 |
| Xsg-1-41 | 231 | 329  | 0.70 | 0.0539 | 0.0016 | 0.3832  | 0.0120 | 0.0515 | 0.0008 | 369  | 69  | 329  | 9  | 323  | 5  | 0.98 | 323        | 5  |
| Xsg-1-42 | 123 | 183  | 0.67 | 0.0636 | 0.0029 | 0.4182  | 0.0175 | 0.0485 | 0.0008 | 729  | 102 | 355  | 13 | 305  | 5  | 0.84 | Discordant |    |
| Xsg-1-43 | 272 | 473  | 0.58 | 0.0540 | 0.0015 | 0.3620  | 0.0102 | 0.0487 | 0.0007 | 372  | 63  | 314  | 8  | 307  | 4  | 0.97 | 307        | 4  |
| Xsg-1-44 | 79  | 93   | 0.85 | 0.0593 | 0.0030 | 0.4412  | 0.0220 | 0.0547 | 0.0010 | 576  | 111 | 371  | 16 | 343  | 6  | 0.92 | 343        | 6  |
| Xsg-1-45 | 173 | 230  | 0.75 | 0.0584 | 0.0023 | 0.4199  | 0.0180 | 0.0522 | 0.0009 | 543  | 87  | 356  | 13 | 328  | 5  | 0.91 | 328        | 5  |
| Xsg-1-46 | 290 | 715  | 0.41 | 0.0696 | 0.0015 | 0.4925  | 0.0106 | 0.0514 | 0.0007 | 917  | 44  | 407  | 7  | 323  | 5  | 0.77 | Discordant |    |
| Xsg-1-47 | 63  | 204  | 0.31 | 0.0737 | 0.0015 | 1.6898  | 0.0358 | 0.1657 | 0.0020 | 1035 | 41  | 1005 | 14 | 988  | 11 | 0.98 | 988        | 11 |
| Xsg-1-48 | 173 | 289  | 0.60 | 0.0565 | 0.0019 | 0.4166  | 0.0142 | 0.0531 | 0.0007 | 472  | 74  | 354  | 10 | 333  | 4  | 0.94 | 333        | 4  |
| Xsg-1-49 | 102 | 190  | 0.53 | 0.0603 | 0.0023 | 0.4282  | 0.0164 | 0.0516 | 0.0008 | 617  | 81  | 362  | 12 | 324  | 5  | 0.89 | Discordant |    |
| Xsg-1-50 | 117 | 288  | 0.41 | 0.0630 | 0.0019 | 0.6013  | 0.0169 | 0.0698 | 0.0012 | 706  | 63  | 478  | 11 | 435  | 7  | 0.90 | 435        | 7  |
| Xsg-1-51 | 200 | 443  | 0.45 | 0.0543 | 0.0015 | 0.3626  | 0.0101 | 0.0486 | 0.0007 | 383  | 63  | 314  | 8  | 306  | 4  | 0.97 | 306        | 4  |
| Xsg-1-52 | 149 | 106  | 1.41 | 0.0790 | 0.0020 | 1.9649  | 0.0552 | 0.1804 | 0.0029 | 1172 | 50  | 1104 | 19 | 1069 | 16 | 0.96 | 1172       | 50 |
| Xsg-1-53 | 336 | 444  | 0.76 | 0.0526 | 0.0013 | 0.4761  | 0.0126 | 0.0654 | 0.0009 | 322  | 57  | 395  | 9  | 408  | 5  | 0.96 | 408        | 5  |
| Xsg-1-54 | 193 | 227  | 0.85 | 0.0530 | 0.0020 | 0.3202  | 0.0116 | 0.0441 | 0.0007 | 332  | 85  | 282  | 9  | 278  | 4  | 0.98 | 278        | 4  |
| Xsg-1-55 | 118 | 154  | 0.77 | 0.0514 | 0.0020 | 0.3415  | 0.0139 | 0.0482 | 0.0008 | 257  | 91  | 298  | 11 | 303  | 5  | 0.98 | 303        | 5  |
| Xsg-1-56 | 55  | 118  | 0.47 | 0.0543 | 0.0024 | 0.4187  | 0.0190 | 0.0559 | 0.0009 | 383  | 102 | 355  | 14 | 350  | 5  | 0.98 | 350        | 5  |
| Xsg-1-57 | 201 | 199  | 1.01 | 0.0534 | 0.0021 | 0.3477  | 0.0139 | 0.0472 | 0.0007 | 346  | 91  | 303  | 10 | 297  | 4  | 0.98 | 297        | 4  |
| Xsg-1-58 | 269 | 269  | 1.00 | 0.0561 | 0.0015 | 0.5507  | 0.0144 | 0.0712 | 0.0009 | 457  | 59  | 445  | 9  | 444  | 5  | 0.99 | 444        | 5  |
| Xsg-1-59 | 259 | 568  | 0.46 | 0.0563 | 0.0015 | 0.3899  | 0.0112 | 0.0499 | 0.0007 | 461  | 27  | 334  | 8  | 314  | 4  | 0.93 | 314        | 4  |
| Xsg-1-60 | 218 | 500  | 0.43 | 0.0575 | 0.0014 | 0.5719  | 0.0151 | 0.0719 | 0.0011 | 509  | 54  | 459  | 10 | 448  | 7  | 0.97 | 448        | 7  |
| Xsg-1-61 | 212 | 219  | 0.97 | 0.0588 | 0.0021 | 0.4295  | 0.0154 | 0.0529 | 0.0007 | 567  | 78  | 363  | 11 | 332  | 5  | 0.91 | 332        | 5  |
| Xsg-1-62 | 388 | 518  | 0.75 | 0.0577 | 0.0014 | 0.6071  | 0.0153 | 0.0767 | 0.0017 | 517  | 54  | 482  | 10 | 476  | 10 | 0.98 | 476        | 10 |
| Xsg-1-63 | 71  | 471  | 0.15 | 0.0578 | 0.0013 | 0.6864  | 0.0161 | 0.0854 | 0.0010 | 524  | 48  | 531  | 10 | 528  | 6  | 0.99 | 528        | 6  |
| Xsg-1-64 | 80  | 125  | 0.64 | 0.0598 | 0.0020 | 0.8255  | 0.0284 | 0.1000 | 0.0014 | 594  | 73  | 611  | 16 | 614  | 8  | 0.99 | 614        | 8  |
| Xsg-1-65 | 102 | 332  | 0.31 | 0.0553 | 0.0016 | 0.3922  | 0.0116 | 0.0513 | 0.0007 | 433  | 67  | 336  | 8  | 323  | 4  | 0.95 | 323        | 4  |
| Xsg-1-66 | 96  | 253  | 0.38 | 0.0533 | 0.0019 | 0.3548  | 0.0118 | 0.0484 | 0.0006 | 343  | 80  | 308  | 9  | 305  | 4  | 0.98 | 305        | 4  |
| Xsg-1-67 | 109 | 236  | 0.46 | 0.0559 | 0.0016 | 0.5656  | 0.0169 | 0.0735 | 0.0010 | 450  | 67  | 455  | 11 | 457  | 6  | 0.99 | 457        | 6  |
| Xsg-1-68 | 75  | 148  | 0.50 | 0.1559 | 0.0023 | 10.1449 | 0.1802 | 0.4704 | 0.0063 | 2413 | 25  | 2448 | 16 | 2485 | 28 | 0.98 | 2413       | 25 |
| Xsg-1-69 | 238 | 180  | 1.32 | 0.0613 | 0.0022 | 0.6214  | 0.0207 | 0.0739 | 0.0009 | 650  | 76  | 491  | 13 | 459  | 6  | 0.93 | 459        | 6  |
| Xsg-1-70 | 151 | 178  | 0.85 | 0.0543 | 0.0020 | 0.5528  | 0.0197 | 0.0740 | 0.0011 | 383  | 81  | 447  | 13 | 460  | 7  | 0.96 | 460        | 7  |
| Xsg-1-71 | 39  | 406  | 0.09 | 0.0914 | 0.0016 | 3.5840  | 0.0703 | 0.2826 | 0.0038 | 1455 | 34  | 1546 | 16 | 1605 | 19 | 0.96 | 1455       | 34 |
| Xsg-1-72 | 209 | 373  | 0.56 | 0.0545 | 0.0014 | 0.5624  | 0.0153 | 0.0744 | 0.0009 | 394  | 53  | 453  | 10 | 462  | 6  | 0.97 | 462        | 6  |
| Xsg-1-73 | 176 | 195  | 0.90 | 0.0877 | 0.0016 | 3.1473  | 0.0625 | 0.2595 | 0.0033 | 1377 | 35  | 1444 | 15 | 1487 | 17 | 0.97 | 1377       | 35 |
| Xsg-1-74 | 113 | 122  | 0.93 | 0.0526 | 0.0024 | 0.4058  | 0.0185 | 0.0573 | 0.0011 | 322  | 104 | 346  | 13 | 359  | 7  | 0.96 | 359        | 7  |
| Xsg-1-75 | 184 | 352  | 0.52 | 0.0553 | 0.0017 | 0.4255  | 0.0135 | 0.0558 | 0.0007 | 433  | 67  | 360  | 10 | 350  | 4  | 0.97 | 350        | 4  |
| Xsg-1-76 | 400 | 253  | 1.58 | 0.0633 | 0.0028 | 1.0991  | 0.0494 | 0.1254 | 0.0021 | 717  | 94  | 753  | 24 | 761  | 12 | 0.98 | 761        | 12 |
| Xsg-1-77 | 431 | 356  | 1.21 | 0.0673 | 0.0023 | 1.2030  | 0.0436 | 0.1283 | 0.0020 | 856  | 70  | 802  | 20 | 778  | 11 | 0.97 | 778        | 11 |
| Xsg-1-78 | 147 | 184  | 0.80 | 0.0624 | 0.0027 | 1.0835  | 0.0475 | 0.1261 | 0.0021 | 700  | 97  | 745  | 23 | 765  | 12 | 0.97 | 765        | 12 |
| Xsg-1-79 | 223 | 235  | 0.95 | 0.0633 | 0.0023 | 1.1520  | 0.0402 | 0.1332 | 0.0022 | 717  | 78  | 778  | 19 | 806  | 13 | 0.96 | 806        | 13 |

Sample Xsg-7, conglomerate, Late Permian Basiergan Formation in the Nileke city of southern Yili basin, (Huang et al., 2018, GSA Bulletin)

|          |      |     |      |        |        |        |        |        |        |      |    |     |    |     |    |      |     |    |
|----------|------|-----|------|--------|--------|--------|--------|--------|--------|------|----|-----|----|-----|----|------|-----|----|
| Xsg-7-01 | 710  | 463 | 1.53 | 0.0704 | 0.0013 | 1.2531 | 0.0272 | 0.1280 | 0.0014 | 943  | 44 | 825 | 12 | 777 | 8  | 0.93 | 777 | 8  |
| Xsg-7-02 | 346  | 686 | 0.50 | 0.0741 | 0.0012 | 1.3087 | 0.0245 | 0.1271 | 0.0013 | 1056 | 32 | 850 | 11 | 771 | 8  | 0.90 | 771 | 8  |
| Xsg-7-03 | 412  | 437 | 0.94 | 0.0658 | 0.0012 | 1.1709 | 0.0231 | 0.1285 | 0.0015 | 1200 | 39 | 787 | 11 | 779 | 9  | 0.98 | 779 | 9  |
| Xsg-7-04 | 697  | 977 | 0.71 | 0.0669 | 0.0010 | 1.2187 | 0.0251 | 0.1312 | 0.0021 | 835  | 30 | 809 | 11 | 795 | 12 | 0.98 | 795 | 12 |
| Xsg-7-05 | 256  | 276 | 0.92 | 0.0660 | 0.0015 | 1.2005 | 0.0279 | 0.1315 | 0.0016 | 807  | 44 | 801 | 13 | 796 | 9  | 0.99 | 796 | 9  |
| Xsg-7-06 | 1203 | 972 | 1.24 | 0.0659 | 0.0012 | 1.1585 | 0.0223 | 0.1269 | 0.0014 | 1200 | 39 | 781 | 10 | 770 | 8  | 0.98 | 770 | 8  |
| Xsg-7-07 | 1397 | 665 | 2.10 | 0.0721 | 0.0013 | 1.2649 | 0.0268 | 0.1261 | 0.0013 | 988  | 37 | 830 | 12 | 766 | 8  | 0.91 | 766 | 8  |
| Xsg-7-08 | 1120 | 585 | 1.92 | 0.0667 | 0.0013 | 1.2358 | 0.0271 | 0.1325 | 0.0017 | 828  | 45 | 817 | 12 | 802 | 10 | 0.98 | 802 | 10 |
| Xsg-7-09 | 1475 | 999 | 1.48 | 0.0712 | 0.0012 | 1.2413 | 0.0234 | 0.1255 | 0.0012 | 963  | 35 | 819 | 11 | 762 | 7  | 0.92 | 762 | 7  |
| Xsg-7-10 | 645  | 515 | 1.25 | 0.0670 | 0.0013 | 1.2306 | 0.0262 | 0.1324 | 0.0015 | 839  | 39 | 815 | 12 | 802 | 9  | 0.98 | 802 | 9  |
| Xsg-7-11 | 466  | 403 | 1.16 | 0.0669 | 0.0014 | 1.2226 | 0.0269 | 0.1324 | 0.0019 | 835  | 43 | 811 | 12 | 801 | 11 | 0.98 | 801 | 11 |
| Xsg-7-12 | 888  | 668 | 1.33 | 0.0667 | 0.0012 | 1.2209 | 0.0270 | 0.1320 | 0.0020 | 829  | 36 | 810 | 12 | 799 | 11 | 0.98 | 799 | 11 |
| Xsg-7-13 | 616  | 447 | 1.38 | 0.0683 | 0.0013 | 1.2465 | 0.0281 | 0.1320 | 0.0020 | 880  | 39 | 822 | 13 | 799 | 12 | 0.97 | 799 | 12 |
| Xsg-7-14 | 832  | 588 | 1.42 | 0.0684 | 0.0012 | 1.1845 | 0.0245 | 0.1252 | 0.0019 | 881  | 31 | 793 | 11 | 760 | 11 | 0.95 | 760 | 11 |

|                                                                                                                                  |      |      |      |        |        |        |        |        |        |      |     |      |    |      |    |       |            |    |
|----------------------------------------------------------------------------------------------------------------------------------|------|------|------|--------|--------|--------|--------|--------|--------|------|-----|------|----|------|----|-------|------------|----|
| 46                                                                                                                               | 11   | 21   | 0.55 | 0.0569 | 0.0036 | 0.5330 | 0.0327 | 0.0679 | 0.0010 | 431  | 3   | 434  | 22 | 423  | 6  | 102.6 | 423        | 6  |
| 47                                                                                                                               | 184  | 243  | 0.76 | 0.0626 | 0.0041 | 0.4870 | 0.0312 | 0.0564 | 0.0008 | 352  | 3   | 403  | 21 | 354  | 5  | 113.8 | Discordant |    |
| 48                                                                                                                               | 160  | 187  | 0.85 | 0.0622 | 0.0014 | 0.4816 | 0.0098 | 0.0561 | 0.0004 | 354  | 5   | 399  | 7  | 352  | 3  | 113.4 | Discordant |    |
| 49                                                                                                                               | 253  | 370  | 0.68 | 0.0576 | 0.0015 | 0.4293 | 0.0105 | 0.0541 | 0.0004 | 355  | 3   | 363  | 7  | 340  | 2  | 106.8 | 340        | 2  |
| 50                                                                                                                               | 257  | 418  | 0.61 | 0.0565 | 0.0013 | 0.4502 | 0.0101 | 0.0578 | 0.0004 | 358  | 3   | 377  | 7  | 362  | 2  | 104.1 | 362        | 2  |
| 51                                                                                                                               | 110  | 146  | 0.75 | 0.0574 | 0.0018 | 0.4526 | 0.0137 | 0.0572 | 0.0005 | 358  | 3   | 379  | 10 | 358  | 3  | 105.9 | 358        | 3  |
| 53                                                                                                                               | 151  | 274  | 0.55 | 0.0567 | 0.0015 | 0.4367 | 0.0114 | 0.0559 | 0.0004 | 359  | 3   | 368  | 8  | 351  | 3  | 104.8 | 351        | 3  |
| 54                                                                                                                               | 84   | 148  | 0.57 | 0.0559 | 0.0019 | 0.5064 | 0.0166 | 0.0657 | 0.0005 | 425  | 6   | 416  | 11 | 410  | 3  | 101.5 | 410        | 3  |
| 55                                                                                                                               | 108  | 186  | 0.58 | 0.0566 | 0.0019 | 0.4274 | 0.0137 | 0.0547 | 0.0004 | 359  | 2   | 361  | 10 | 344  | 3  | 104.9 | 344        | 3  |
| 57                                                                                                                               | 177  | 217  | 0.81 | 0.0594 | 0.0013 | 0.4639 | 0.0091 | 0.0566 | 0.0004 | 362  | 2   | 387  | 6  | 355  | 3  | 109.0 | 355        | 3  |
| 58                                                                                                                               | 452  | 546  | 0.83 | 0.0555 | 0.0016 | 0.4035 | 0.0115 | 0.0527 | 0.0004 | 363  | 5   | 344  | 8  | 331  | 2  | 103.9 | 331        | 2  |
| 59                                                                                                                               | 131  | 173  | 0.76 | 0.0554 | 0.0037 | 0.4774 | 0.0314 | 0.0625 | 0.0008 | 363  | 3   | 396  | 22 | 391  | 5  | 101.3 | 391        | 5  |
| 60                                                                                                                               | 63   | 144  | 0.44 | 0.0548 | 0.0022 | 0.4107 | 0.0157 | 0.0543 | 0.0005 | 365  | 3   | 349  | 11 | 341  | 3  | 102.3 | 341        | 3  |
| 61                                                                                                                               | 78   | 137  | 0.57 | 0.0555 | 0.0019 | 0.4860 | 0.0164 | 0.0635 | 0.0005 | 366  | 3   | 402  | 11 | 397  | 3  | 101.3 | 397        | 3  |
| 62                                                                                                                               | 38   | 53   | 0.71 | 0.0596 | 0.0033 | 0.5605 | 0.0295 | 0.0682 | 0.0010 | 435  | 5   | 452  | 19 | 425  | 6  | 106.4 | 425        | 6  |
| 63                                                                                                                               | 266  | 261  | 1.02 | 0.0586 | 0.0019 | 0.4611 | 0.0147 | 0.0571 | 0.0004 | 368  | 7   | 385  | 10 | 358  | 3  | 107.5 | 358        | 3  |
| 64                                                                                                                               | 230  | 348  | 0.66 | 0.0543 | 0.0009 | 0.4411 | 0.0066 | 0.0590 | 0.0004 | 369  | 2   | 371  | 5  | 369  | 2  | 100.5 | 369        | 2  |
| Sample 639, meta-sandstone, Early Silurian, in Baluntai area of Central Tianshan Block, (Ma et al., 2012a, Precambrian Research) |      |      |      |        |        |        |        |        |        |      |     |      |    |      |    |       |            |    |
| 639-01                                                                                                                           | 449  | 267  | 1.68 | 0.0569 | 0.0011 | 0.5513 | 0.0100 | 0.0703 | 0.0010 | 487  | 19  | 446  | 7  | 438  | 6  | 101.8 | 438        | 6  |
| 639-02                                                                                                                           | 574  | 611  | 0.94 | 0.0836 | 0.0028 | 2.564  | 0.0864 | 0.2216 | 0.0039 | 1284 | 39  | 1290 | 25 | 1290 | 21 | 99.5  | 1284       | 39 |
| 639-03                                                                                                                           | 16   | 22   | 0.75 | 0.1378 | 0.0102 | 7.584  | 0.5262 | 0.4006 | 0.0145 | 2200 | 71  | 2183 | 62 | 2172 | 67 | 101.3 | 2200       | 71 |
| 639-04                                                                                                                           | 112  | 108  | 1.04 | 0.0815 | 0.0038 | 2.372  | 0.1028 | 0.2113 | 0.0040 | 1234 | 55  | 1234 | 31 | 1236 | 21 | 99.8  | 1234       | 55 |
| 639-05                                                                                                                           | 40   | 78   | 0.51 | 0.0615 | 0.0031 | 0.7537 | 0.0362 | 0.0890 | 0.0017 | 655  | 71  | 570  | 21 | 549  | 10 | 103.8 | 549        | 10 |
| 639-06                                                                                                                           | 237  | 225  | 1.06 | 0.0743 | 0.0022 | 1.899  | 0.0530 | 0.1855 | 0.0028 | 1050 | 32  | 1081 | 19 | 1097 | 15 | 95.7  | 1050       | 32 |
| 639-07                                                                                                                           | 356  | 280  | 1.27 | 0.0553 | 0.0030 | 0.5613 | 0.0293 | 0.0737 | 0.0016 | 426  | 77  | 452  | 19 | 459  | 10 | 98.5  | 459        | 10 |
| 639-08                                                                                                                           | 550  | 560  | 0.98 | 0.0783 | 0.0018 | 2.102  | 0.0474 | 0.1949 | 0.0032 | 1153 | 22  | 1150 | 16 | 1148 | 17 | 100.4 | 1153       | 22 |
| 639-09                                                                                                                           | 129  | 117  | 1.10 | 0.1741 | 0.0021 | 11.880 | 0.1411 | 0.4948 | 0.0061 | 2598 | 9   | 2595 | 11 | 2592 | 26 | 100.2 | 2598       | 9  |
| 639-10                                                                                                                           | 137  | 238  | 0.58 | 0.0700 | 0.0009 | 1.506  | 0.0202 | 0.1561 | 0.0020 | 927  | 12  | 933  | 8  | 935  | 11 | 99.8  | 935        | 11 |
| 639-11                                                                                                                           | 154  | 492  | 0.31 | 0.0697 | 0.0012 | 1.401  | 0.0225 | 0.1458 | 0.0019 | 920  | 15  | 890  | 10 | 877  | 11 | 101.5 | 877        | 11 |
| 639-12                                                                                                                           | 213  | 287  | 0.74 | 0.1023 | 0.0016 | 4.173  | 0.0637 | 0.2959 | 0.0039 | 1666 | 13  | 1669 | 12 | 1671 | 19 | 99.7  | 1666       | 13 |
| 639-13                                                                                                                           | 227  | 344  | 0.66 | 0.0571 | 0.0015 | 0.5950 | 0.0155 | 0.0756 | 0.0012 | 495  | 31  | 474  | 10 | 470  | 7  | 100.9 | 470        | 7  |
| 639-14                                                                                                                           | 579  | 242  | 2.40 | 0.0627 | 0.0010 | 0.7710 | 0.0121 | 0.0892 | 0.0012 | 698  | 15  | 580  | 7  | 551  | 7  | 105.3 | 551        | 7  |
| 639-15                                                                                                                           | 327  | 543  | 0.60 | 0.0697 | 0.0010 | 1.507  | 0.0202 | 0.1569 | 0.0021 | 920  | 12  | 933  | 8  | 939  | 11 | 99.4  | 939        | 11 |
| 639-16                                                                                                                           | 143  | 101  | 1.41 | 0.0947 | 0.0025 | 3.401  | 0.0862 | 0.2606 | 0.0040 | 1522 | 26  | 1505 | 20 | 1493 | 20 | 101.9 | 1522       | 26 |
| 639-17                                                                                                                           | 209  | 251  | 0.83 | 0.1852 | 0.0045 | 9.584  | 0.2223 | 0.3754 | 0.0055 | 2700 | 20  | 2396 | 21 | 2055 | 26 | 131.4 | Discordant |    |
| 639-18                                                                                                                           | 293  | 1273 | 0.23 | 0.0757 | 0.0023 | 1.468  | 0.0432 | 0.1406 | 0.0022 | 1088 | 35  | 917  | 18 | 848  | 12 | 108.1 | 848        | 12 |
| 639-19                                                                                                                           | 213  | 292  | 0.73 | 0.1746 | 0.0017 | 11.082 | 0.1080 | 0.4604 | 0.0057 | 2602 | 9   | 2530 | 9  | 2441 | 25 | 106.6 | 2602       | 9  |
| 639-20                                                                                                                           | 307  | 437  | 0.70 | 0.1372 | 0.0013 | 6.895  | 0.0676 | 0.3645 | 0.0046 | 2192 | 10  | 2098 | 9  | 2004 | 22 | 109.4 | 2192       | 10 |
| 639-21                                                                                                                           | 225  | 257  | 0.87 | 0.1534 | 0.0018 | 7.277  | 0.0873 | 0.3440 | 0.0045 | 2385 | 10  | 2146 | 11 | 1906 | 21 | 125.1 | Discordant |    |
| 639-22                                                                                                                           | 466  | 467  | 1.00 | 0.0755 | 0.0012 | 1.927  | 0.0290 | 0.1851 | 0.0024 | 1082 | 14  | 1091 | 10 | 1095 | 13 | 98.8  | 1082       | 14 |
| 639-23                                                                                                                           | 279  | 266  | 1.05 | 0.1501 | 0.0024 | 6.295  | 0.1003 | 0.3043 | 0.0040 | 2346 | 12  | 2018 | 14 | 1712 | 20 | 137.0 | Discordant |    |
| 639-24                                                                                                                           | 168  | 355  | 0.47 | 0.0705 | 0.0008 | 1.543  | 0.0186 | 0.1587 | 0.0021 | 944  | 12  | 948  | 7  | 950  | 12 | 99.8  | 950        | 12 |
| 639-25                                                                                                                           | 931  | 244  | 3.82 | 0.0976 | 0.0016 | 3.698  | 0.0578 | 0.2749 | 0.0036 | 1578 | 13  | 1571 | 12 | 1566 | 18 | 100.8 | 1578       | 13 |
| 639-26                                                                                                                           | 134  | 98   | 1.37 | 0.1095 | 0.0023 | 4.777  | 0.0949 | 0.3165 | 0.0050 | 1790 | 17  | 1781 | 17 | 1773 | 25 | 101.0 | 1790       | 17 |
| 639-27                                                                                                                           | 56   | 80   | 0.70 | 0.0976 | 0.0017 | 3.739  | 0.0725 | 0.2780 | 0.0042 | 1578 | 34  | 1580 | 16 | 1581 | 21 | 99.8  | 1578       | 34 |
| 639-28                                                                                                                           | 99   | 52   | 1.93 | 0.0980 | 0.0024 | 3.771  | 0.0950 | 0.2791 | 0.0047 | 1587 | 47  | 1587 | 20 | 1587 | 24 | 100.0 | 1587       | 47 |
| 639-29                                                                                                                           | 197  | 283  | 0.70 | 0.1175 | 0.0024 | 5.628  | 0.1239 | 0.3473 | 0.0055 | 1919 | 38  | 1920 | 19 | 1922 | 26 | 99.8  | 1919       | 38 |
| 639-30                                                                                                                           | 180  | 831  | 0.22 | 0.0619 | 0.0012 | 0.7872 | 0.0147 | 0.0922 | 0.0013 | 670  | 19  | 590  | 8  | 569  | 7  | 103.7 | 569        | 7  |
| 639-31                                                                                                                           | 48   | 90   | 0.53 | 0.2130 | 0.0024 | 17.046 | 0.1971 | 0.5806 | 0.0077 | 2929 | 10  | 2937 | 11 | 2951 | 32 | 99.3  | 2929       | 10 |
| 639-32                                                                                                                           | 166  | 209  | 0.79 | 0.0691 | 0.0011 | 1.527  | 0.0239 | 0.1603 | 0.0022 | 901  | 14  | 941  | 10 | 959  | 12 | 98.1  | 959        | 12 |
| 639-33                                                                                                                           | 57   | 147  | 0.39 | 0.1009 | 0.0019 | 3.958  | 0.0763 | 0.2846 | 0.0040 | 1640 | 17  | 1626 | 16 | 1614 | 20 | 101.6 | 1640       | 17 |
| 639-34                                                                                                                           | 21   | 21   | 1.02 | 0.1577 | 0.0038 | 9.284  | 0.2194 | 0.4266 | 0.0069 | 2431 | 20  | 2366 | 22 | 2290 | 31 | 106.2 | 2431       | 20 |
| 639-35                                                                                                                           | 40   | 78   | 0.51 | 0.0657 | 0.0029 | 1.232  | 0.0518 | 0.1361 | 0.0026 | 796  | 57  | 815  | 24 | 822  | 15 | 99.1  | 822        | 15 |
| 639-36                                                                                                                           | 66   | 261  | 0.25 | 0.0657 | 0.0076 | 0.9183 | 0.0959 | 0.1014 | 0.0039 | 797  | 155 | 661  | 51 | 622  | 23 | 106.3 | 622        | 23 |
| 639-37                                                                                                                           | 432  | 317  | 1.36 | 0.1618 | 0.0031 | 10.236 | 0.2030 | 0.4586 | 0.0064 | 2474 | 16  | 2456 | 18 | 2433 | 28 | 101.7 | 2474       | 16 |
| 639-38                                                                                                                           | 443  | 801  | 0.55 | 0.0570 | 0.0011 | 0.5626 | 0.0108 | 0.0716 | 0.0009 | 493  | 22  | 453  | 7  | 445  | 5  | 101.8 | 445        | 5  |
| 639-39                                                                                                                           | 84   | 224  | 0.38 | 0.0789 | 0.0022 | 2.147  | 0.0582 | 0.1971 | 0.0032 | 1171 | 29  | 1164 | 19 | 1160 | 17 | 100.9 | 1171       | 29 |
| 639-40                                                                                                                           | 297  | 380  | 0.78 | 0.0569 | 0.0014 | 0.6142 | 0.0151 | 0.0784 | 0.0011 | 486  | 30  | 486  | 9  | 486  | 7  | 100.0 | 486        | 7  |
| 639-41                                                                                                                           | 697  | 625  | 1.12 | 0.0677 | 0.0012 | 1.248  | 0.0225 | 0.1339 | 0.0017 | 858  | 18  | 823  | 10 | 810  | 10 | 101.6 | 810        | 10 |
| 639-42                                                                                                                           | 83   | 408  | 0.20 | 0.0845 | 0.0020 | 1.851  | 0.0374 | 0.1589 | 0.0020 | 1305 | 47  | 1064 | 13 | 950  | 11 | 112.0 | Discordant |    |
| 639-43                                                                                                                           | 141  | 281  | 0.50 | 0.0704 | 0.0016 | 1.546  | 0.0354 | 0.1592 | 0.0023 | 941  | 24  | 949  | 14 | 952  | 13 | 99.7  | 952        | 13 |
| 639-44                                                                                                                           | 232  | 294  | 0.79 | 0.0968 | 0.0015 | 3.780  | 0.0622 | 0.2834 | 0.0037 | 1563 | 14  | 1588 | 13 | 1608 | 19 | 97.2  | 1563       | 14 |
| 639-45                                                                                                                           | 230  | 508  | 0.45 | 0.1114 | 0.0019 | 5.025  | 0.0896 | 0.3273 | 0.0043 | 1822 | 15  | 1823 | 15 | 1825 | 21 | 99.8  | 1822       | 15 |
| 639-46                                                                                                                           | 194  | 292  | 0.66 | 0.0785 | 0.0019 | 1.768  | 0.0413 | 0.1633 | 0.0023 | 1160 | 25  | 1034 | 15 | 975  | 13 | 106.1 | 975        | 13 |
| 639-47                                                                                                                           | 478  | 576  | 0.83 | 0.0963 | 0.0024 | 3.389  | 0.0860 | 0.2554 | 0.0040 | 1553 | 25  | 1502 | 20 | 1466 | 20 | 105.9 | 1553       | 25 |
| 639-48                                                                                                                           | 486  | 492  | 0.99 | 0.0566 | 0.0010 | 0.6042 | 0.0113 | 0.0775 | 0.0010 | 474  | 20  | 480  | 7  | 481  | 6  | 99.8  | 481        | 6  |
| 639-49                                                                                                                           | 136  | 59   | 2.31 | 0.1028 | 0.0021 | 3.845  | 0.0792 | 0.2714 | 0.0040 | 1675 | 18  | 1602 | 17 | 1548 | 20 | 108.2 | 1675       | 18 |
| 639-50                                                                                                                           | 1321 | 1038 | 1.27 | 0.0754 | 0.0011 | 1.902  | 0.0305 | 0.1831 | 0.0023 | 1078 | 15  | 1082 | 11 | 1084 | 13 | 99.4  | 1078       | 15 |
| 639-51                                                                                                                           | 61   | 1091 | 0.06 | 0.0785 | 0.0059 | 1.758  | 0.1289 | 0.1621 | 0.0047 | 1159 | 100 | 1030 | 47 | 968  | 26 | 106.4 | 968        | 26 |
| 639-52                                                                                                                           | 129  | 115  | 1.13 | 0.1053 | 0.0016 | 4.188  | 0.0701 | 0.2886 | 0.0038 | 1719 | 14  | 1672 | 14 | 1635 | 19 | 105.1 | 1719       | 14 |
| 639-53                                                                                                                           | 681  | 539  | 1.26 | 0.0566 | 0.0010 | 0.5862 | 0.0111 | 0.0752 |        |      |     |      |    |      |    |       |            |    |

|        |      |      |      |        |        |        |        |        |        |      |     |      |    |      |    |       |            |    |
|--------|------|------|------|--------|--------|--------|--------|--------|--------|------|-----|------|----|------|----|-------|------------|----|
| 640-35 | 499  | 318  | 1.57 | 0.0553 | 0.0010 | 0.5497 | 0.0103 | 0.0722 | 0.0010 | 424  | 20  | 445  | 7  | 449  | 6  | 99.1  | 449        | 6  |
| 640-36 | 305  | 401  | 0.76 | 0.0578 | 0.0020 | 0.5644 | 0.0184 | 0.0709 | 0.0011 | 523  | 45  | 454  | 12 | 441  | 7  | 102.9 | 441        | 7  |
| 640-37 | 204  | 291  | 0.70 | 0.0761 | 0.0014 | 1.909  | 0.0384 | 0.1822 | 0.0026 | 1096 | 20  | 1084 | 13 | 1079 | 14 | 101.6 | 1096       | 20 |
| 640-38 | 64   | 175  | 0.36 | 0.1134 | 0.0016 | 5.195  | 0.0750 | 0.3324 | 0.0040 | 1854 | 12  | 1852 | 12 | 1850 | 19 | 100.2 | 1854       | 12 |
| 640-39 | 196  | 293  | 0.67 | 0.0558 | 0.0009 | 0.5563 | 0.0097 | 0.0723 | 0.0010 | 446  | 18  | 449  | 6  | 450  | 6  | 99.8  | 450        | 6  |
| 640-40 | 172  | 1993 | 0.09 | 0.0696 | 0.0020 | 1.612  | 0.0488 | 0.1675 | 0.0029 | 916  | 35  | 975  | 19 | 998  | 16 | 97.7  | 998        | 16 |
| 640-41 | 109  | 130  | 0.83 | 0.1005 | 0.0048 | 3.883  | 0.1748 | 0.2810 | 0.0059 | 1632 | 52  | 1610 | 36 | 1596 | 30 | 102.3 | 1632       | 52 |
| 640-42 | 578  | 1337 | 0.43 | 0.0819 | 0.0010 | 1.811  | 0.0238 | 0.1605 | 0.0019 | 1242 | 11  | 1050 | 9  | 959  | 11 | 109.5 | 959        | 11 |
| 640-43 | 108  | 71   | 1.52 | 0.1637 | 0.0039 | 10.657 | 0.2591 | 0.4721 | 0.0078 | 2494 | 20  | 2494 | 23 | 2493 | 34 | 100.0 | 2494       | 20 |
| 640-44 | 100  | 1144 | 0.09 | 0.0726 | 0.0012 | 1.449  | 0.0254 | 0.1447 | 0.0019 | 1004 | 17  | 909  | 11 | 871  | 11 | 104.4 | 871        | 11 |
| 640-45 | 1980 | 1094 | 1.81 | 0.0741 | 0.0017 | 1.651  | 0.0381 | 0.1620 | 0.0023 | 1043 | 25  | 990  | 15 | 968  | 13 | 102.3 | 968        | 13 |
| 640-46 | 210  | 598  | 0.35 | 0.0737 | 0.0018 | 1.671  | 0.0407 | 0.1645 | 0.0024 | 1033 | 27  | 997  | 15 | 982  | 13 | 101.5 | 982        | 13 |
| 640-47 | 99   | 125  | 0.79 | 0.1003 | 0.0064 | 3.900  | 0.2382 | 0.2831 | 0.0078 | 1629 | 73  | 1614 | 49 | 1607 | 39 | 101.4 | 1629       | 73 |
| 640-48 | 121  | 236  | 0.51 | 0.0766 | 0.0071 | 1.499  | 0.1324 | 0.1422 | 0.0050 | 1109 | 121 | 930  | 54 | 857  | 28 | 108.5 | 857        | 28 |
| 640-49 | 270  | 539  | 0.50 | 0.0734 | 0.0026 | 1.590  | 0.0558 | 0.1571 | 0.0028 | 1026 | 43  | 966  | 22 | 941  | 15 | 102.7 | 941        | 15 |
| 640-50 | 302  | 262  | 1.15 | 0.0784 | 0.0035 | 2.083  | 0.0883 | 0.1927 | 0.0038 | 1157 | 53  | 1143 | 29 | 1136 | 20 | 101.8 | 1157       | 53 |
| 640-51 | 274  | 164  | 1.68 | 0.0581 | 0.0018 | 0.5709 | 0.0169 | 0.0713 | 0.0011 | 533  | 39  | 459  | 11 | 444  | 6  | 103.4 | 444        | 6  |
| 640-52 | 98   | 132  | 0.74 | 0.1627 | 0.0035 | 10.359 | 0.2285 | 0.4619 | 0.0068 | 2484 | 19  | 2467 | 20 | 2448 | 30 | 101.5 | 2484       | 19 |
| 640-53 | 386  | 425  | 0.91 | 0.0579 | 0.0012 | 0.5805 | 0.0122 | 0.0727 | 0.0010 | 527  | 24  | 465  | 8  | 452  | 6  | 102.9 | 452        | 6  |
| 640-54 | 632  | 684  | 0.92 | 0.1617 | 0.0065 | 9.268  | 0.3680 | 0.4158 | 0.0087 | 2473 | 39  | 2365 | 36 | 2241 | 40 | 110.4 | Discordant |    |
| 640-55 | 414  | 719  | 0.58 | 0.1018 | 0.0017 | 4.022  | 0.0708 | 0.2867 | 0.0037 | 1656 | 15  | 1639 | 14 | 1625 | 19 | 101.9 | 1656       | 15 |
| 640-56 | 510  | 450  | 1.13 | 0.0719 | 0.0011 | 1.542  | 0.0245 | 0.1557 | 0.0020 | 983  | 15  | 947  | 10 | 933  | 11 | 101.5 | 933        | 11 |
| 640-57 | 135  | 745  | 0.18 | 0.0696 | 0.0012 | 1.181  | 0.0209 | 0.1231 | 0.0015 | 915  | 18  | 792  | 10 | 749  | 9  | 105.7 | 749        | 9  |
| 640-58 | 60   | 76   | 0.79 | 0.2006 | 0.0077 | 14.951 | 0.5422 | 0.5405 | 0.0106 | 2831 | 34  | 2812 | 35 | 2786 | 44 | 101.6 | 2831       | 34 |
| 640-59 | 88   | 101  | 0.87 | 0.0970 | 0.0034 | 3.393  | 0.1142 | 0.2540 | 0.0045 | 1568 | 37  | 1503 | 26 | 1459 | 23 | 107.5 | 1568       | 37 |
| 640-60 | 246  | 224  | 1.10 | 0.0721 | 0.0014 | 1.725  | 0.0341 | 0.1736 | 0.0023 | 989  | 20  | 1018 | 13 | 1032 | 13 | 95.8  | 989        | 20 |
| 640-61 | 714  | 455  | 1.57 | 0.0564 | 0.0022 | 0.5770 | 0.0217 | 0.0742 | 0.0015 | 467  | 49  | 462  | 14 | 461  | 9  | 100.2 | 461        | 9  |
| 640-62 | 317  | 446  | 0.71 | 0.1139 | 0.0028 | 5.136  | 0.1290 | 0.3272 | 0.0049 | 1863 | 25  | 1842 | 21 | 1825 | 24 | 102.1 | 1863       | 25 |
| 640-63 | 224  | 137  | 1.64 | 0.0977 | 0.0022 | 3.703  | 0.0801 | 0.2748 | 0.0037 | 1581 | 22  | 1572 | 17 | 1565 | 19 | 101.0 | 1581       | 22 |
| 640-64 | 1966 | 4508 | 0.44 | 0.0662 | 0.0004 | 1.226  | 0.0219 | 0.1330 | 0.0019 | 812  | 13  | 813  | 10 | 805  | 11 | 101.0 | 805        | 11 |
| 640-65 | 149  | 403  | 0.37 | 0.1006 | 0.0025 | 3.693  | 0.0824 | 0.2663 | 0.0032 | 1635 | 48  | 1570 | 18 | 1522 | 16 | 107.4 | 1635       | 48 |
| 640-66 | 796  | 1371 | 0.58 | 0.0603 | 0.0024 | 0.7527 | 0.0303 | 0.0901 | 0.0012 | 615  | 87  | 570  | 18 | 556  | 7  | 102.5 | 556        | 7  |

Sample 641, meta-sandstone, Early Silurian, in Baluntai area of Central Tianshan Block, (Ma et al., 2012a, Precambrian Research)

|        |      |      |      |        |        |        |        |        |        |      |     |      |    |      |    |       |            |    |
|--------|------|------|------|--------|--------|--------|--------|--------|--------|------|-----|------|----|------|----|-------|------------|----|
| 641-01 | 326  | 446  | 0.73 | 0.0748 | 0.0013 | 1.837  | 0.0312 | 0.1781 | 0.0026 | 1064 | 15  | 1059 | 11 | 1057 | 14 | 100.7 | 1064       | 15 |
| 641-02 | 595  | 538  | 1.11 | 0.0578 | 0.0011 | 0.5937 | 0.0109 | 0.0745 | 0.0011 | 523  | 18  | 473  | 7  | 463  | 6  | 102.2 | 463        | 6  |
| 641-03 | 185  | 291  | 0.64 | 0.1869 | 0.0023 | 13.487 | 0.1682 | 0.5233 | 0.0070 | 2715 | 10  | 2714 | 12 | 2713 | 30 | 100.1 | 2715       | 10 |
| 641-04 | 127  | 131  | 0.97 | 0.0753 | 0.0018 | 1.630  | 0.0377 | 0.1569 | 0.0023 | 1078 | 24  | 982  | 15 | 939  | 13 | 104.6 | 939        | 13 |
| 641-05 | 197  | 332  | 0.59 | 0.0711 | 0.0018 | 1.570  | 0.0389 | 0.1601 | 0.0023 | 961  | 28  | 958  | 15 | 957  | 13 | 100.1 | 957        | 13 |
| 641-06 | 3167 | 1936 | 1.64 | 0.0915 | 0.0017 | 3.216  | 0.0595 | 0.2551 | 0.0037 | 1456 | 16  | 1461 | 14 | 1465 | 19 | 99.4  | 1456       | 16 |
| 641-07 | 203  | 777  | 0.26 | 0.1507 | 0.0028 | 7.934  | 0.1380 | 0.3817 | 0.0051 | 2354 | 14  | 2224 | 16 | 2084 | 24 | 113.0 | Discordant |    |
| 641-08 | 94   | 108  | 0.87 | 0.2634 | 0.0049 | 23.987 | 0.4253 | 0.6601 | 0.0088 | 3267 | 13  | 3268 | 17 | 3268 | 34 | 100.0 | 3267       | 13 |
| 641-09 | 344  | 685  | 0.50 | 0.0711 | 0.0011 | 1.504  | 0.0219 | 0.1534 | 0.0019 | 961  | 13  | 932  | 9  | 920  | 11 | 101.3 | 920        | 11 |
| 641-10 | 311  | 194  | 1.61 | 0.0768 | 0.0013 | 2.099  | 0.0338 | 0.1982 | 0.0027 | 1117 | 14  | 1148 | 11 | 1166 | 15 | 95.8  | 1117       | 14 |
| 641-11 | 1132 | 760  | 1.49 | 0.0626 | 0.0007 | 0.7884 | 0.0093 | 0.0914 | 0.0012 | 694  | 12  | 590  | 5  | 564  | 7  | 104.6 | 564        | 7  |
| 641-12 | 215  | 170  | 1.26 | 0.0716 | 0.0012 | 1.597  | 0.0254 | 0.1619 | 0.0022 | 973  | 15  | 969  | 10 | 967  | 12 | 100.2 | 967        | 12 |
| 641-13 | 264  | 218  | 1.21 | 0.0596 | 0.0012 | 0.5898 | 0.0116 | 0.0718 | 0.0010 | 588  | 21  | 471  | 7  | 447  | 6  | 105.4 | 447        | 6  |
| 641-14 | 244  | 282  | 0.87 | 0.0619 | 0.0017 | 0.6934 | 0.0181 | 0.0812 | 0.0013 | 671  | 30  | 535  | 11 | 504  | 8  | 106.2 | 504        | 8  |
| 641-15 | 94   | 1128 | 0.08 | 0.1326 | 0.0020 | 6.198  | 0.0928 | 0.3389 | 0.0048 | 2133 | 12  | 2004 | 13 | 1882 | 23 | 113.3 | Discordant |    |
| 641-16 | 400  | 440  | 0.91 | 0.0710 | 0.0008 | 1.521  | 0.0166 | 0.1554 | 0.0020 | 958  | 12  | 939  | 7  | 931  | 11 | 100.9 | 931        | 11 |
| 641-17 | 75   | 156  | 0.48 | 0.1046 | 0.0025 | 4.376  | 0.0960 | 0.3034 | 0.0045 | 1707 | 20  | 1708 | 18 | 1708 | 22 | 99.9  | 1707       | 20 |
| 641-18 | 1435 | 326  | 4.40 | 0.0666 | 0.0011 | 1.243  | 0.0196 | 0.1355 | 0.0018 | 825  | 15  | 820  | 9  | 819  | 10 | 100.1 | 819        | 10 |
| 641-19 | 37   | 41   | 0.91 | 0.1805 | 0.0088 | 12.056 | 0.5499 | 0.4851 | 0.0120 | 2658 | 44  | 2609 | 43 | 2550 | 52 | 104.2 | 2658       | 44 |
| 641-20 | 161  | 803  | 0.20 | 0.1737 | 0.0026 | 10.175 | 0.1494 | 0.4249 | 0.0052 | 2593 | 11  | 2451 | 14 | 2283 | 23 | 113.6 | Discordant |    |
| 641-21 | 69   | 121  | 0.57 | 0.0840 | 0.0024 | 2.428  | 0.0657 | 0.2095 | 0.0032 | 1293 | 30  | 1251 | 19 | 1226 | 17 | 105.5 | 1293       | 30 |
| 641-22 | 114  | 452  | 0.25 | 0.0799 | 0.0010 | 2.243  | 0.0272 | 0.2036 | 0.0028 | 1195 | 12  | 1195 | 9  | 1195 | 15 | 100.0 | 1195       | 12 |
| 641-23 | 279  | 481  | 0.58 | 0.0747 | 0.0034 | 1.816  | 0.0786 | 0.1764 | 0.0039 | 1059 | 52  | 1051 | 28 | 1047 | 22 | 101.1 | 1059       | 52 |
| 641-24 | 84   | 89   | 0.94 | 0.0561 | 0.0021 | 0.5700 | 0.0207 | 0.0736 | 0.0013 | 457  | 84  | 458  | 13 | 458  | 8  | 100.0 | 458        | 8  |
| 641-25 | 104  | 806  | 0.13 | 0.0990 | 0.0021 | 3.851  | 0.0851 | 0.2823 | 0.0043 | 1605 | 40  | 1603 | 18 | 1603 | 22 | 100.1 | 1605       | 40 |
| 641-26 | 44   | 56   | 0.80 | 0.0733 | 0.0017 | 1.658  | 0.0378 | 0.1642 | 0.0025 | 1021 | 24  | 993  | 14 | 980  | 14 | 101.3 | 980        | 14 |
| 641-27 | 920  | 1066 | 0.86 | 0.0599 | 0.0007 | 0.8551 | 0.0099 | 0.1035 | 0.0014 | 601  | 13  | 627  | 5  | 635  | 8  | 98.7  | 635        | 8  |
| 641-28 | 183  | 256  | 0.71 | 0.0697 | 0.0040 | 1.540  | 0.0834 | 0.1603 | 0.0037 | 919  | 73  | 946  | 33 | 959  | 21 | 98.6  | 959        | 21 |
| 641-29 | 184  | 284  | 0.65 | 0.0605 | 0.0013 | 0.7540 | 0.0156 | 0.0904 | 0.0012 | 622  | 24  | 571  | 9  | 558  | 7  | 102.3 | 558        | 7  |
| 641-30 | 234  | 202  | 1.16 | 0.1000 | 0.0014 | 3.914  | 0.0596 | 0.2838 | 0.0035 | 1624 | 13  | 1617 | 12 | 1611 | 18 | 100.8 | 1624       | 13 |
| 641-31 | 133  | 216  | 0.62 | 0.0570 | 0.0011 | 0.6308 | 0.0122 | 0.0803 | 0.0010 | 490  | 21  | 497  | 8  | 498  | 6  | 99.8  | 498        | 6  |
| 641-32 | 141  | 174  | 0.81 | 0.0588 | 0.0016 | 0.5771 | 0.0154 | 0.0712 | 0.0010 | 560  | 33  | 463  | 10 | 443  | 6  | 104.5 | 443        | 6  |
| 641-33 | 171  | 287  | 0.59 | 0.0871 | 0.0017 | 2.774  | 0.0557 | 0.2311 | 0.0032 | 1362 | 19  | 1348 | 15 | 1340 | 17 | 101.6 | 1362       | 19 |
| 641-34 | 252  | 421  | 0.60 | 0.0744 | 0.0012 | 1.804  | 0.0304 | 0.1759 | 0.0023 | 1053 | 16  | 1047 | 11 | 1044 | 13 | 100.9 | 1053       | 16 |
| 641-35 | 76   | 238  | 0.32 | 0.0721 | 0.0014 | 1.522  | 0.0297 | 0.1532 | 0.0019 | 989  | 21  | 939  | 12 | 919  | 11 | 102.2 | 919        | 11 |
| 641-36 | 958  | 543  | 1.76 | 0.0898 | 0.0031 | 3.133  | 0.1054 | 0.2510 | 0.0045 | 1421 | 37  | 1441 | 26 | 1444 | 23 | 98.4  | 1421       | 37 |
| 641-37 | 501  | 376  | 1.33 | 0.0677 | 0.0013 | 1.180  | 0.0227 | 0.1264 | 0.0016 | 860  | 20  | 791  | 11 | 767  | 9  | 103.1 | 767        | 9  |
| 641-38 | 604  | 823  | 0.73 | 0.0731 | 0.0011 | 1.674  | 0.0263 | 0.1661 | 0.0021 | 1017 | 15  | 999  | 10 | 991  | 11 | 100.8 | 991        | 11 |
| 641-39 | 248  | 195  | 1.27 | 0.0579 | 0.0019 | 0.5696 | 0.0181 | 0.0714 | 0.0011 | 524  | 43  | 458  | 12 | 444  | 6  | 103.2 | 444        | 6  |
| 641-40 | 317  | 1503 | 0.21 | 0.0993 | 0.0027 | 3.614  | 0.0946 | 0.2683 | 0.0039 | 1611 | 27  | 1566 | 21 | 1532 | 20 | 105.2 | 1611       | 27 |
| 641-41 | 118  | 512  | 0.23 | 0.0740 | 0.0011 | 1.618  | 0.0255 | 0.1586 | 0.0020 | 1042 | 15  | 977  | 10 | 949  | 11 | 103.0 | 949        | 11 |
| 641-42 | 195  | 102  | 1.91 | 0.1338 | 0.0080 | 6.812  | 0.3931 | 0.3705 | 0.0097 | 2149 | 64  | 2087 | 51 | 2032 | 46 | 105.8 | 2149       | 64 |
| 641-43 | 291  | 605  | 0.48 | 0.0610 | 0.0010 | 0.7912 | 0.0144 | 0.0941 | 0.0013 | 639  | 18  | 592  | 8  | 580  | 8  | 102.1 | 580        | 8  |
| 641-44 | 1483 | 1632 | 0.91 | 0.0781 | 0.0017 | 2.102  | 0.0493 | 0.1951 | 0.0031 | 1150 | 23  | 1149 | 16 | 1149 | 17 | 100.1 | 1150       | 23 |
| 641-45 | 137  | 147  | 0.93 | 0.0729 | 0.0012 | 1.592  | 0.0269 | 0.1584 | 0.0020 | 1012 | 16  | 967  | 11 | 948  | 11 | 102.0 | 948        | 11 |
| 641-46 | 279  | 274  | 1.02 | 0.0734 | 0.0013 | 1.690  | 0.0313 | 0.1670 | 0.0023 | 1025 | 18  | 1005 | 12 | 996  | 12 | 100.9 | 996        | 12 |
| 641-47 | 21   | 385  | 0.06 | 0.1382 | 0.0022 | 7.722  | 0.1288 | 0.4054 | 0.0051 | 2205 | 14  | 2199 | 15 | 2194 | 23 | 100.5 | 2205       | 14 |
| 641-48 | 697  | 939  | 0.74 | 0.0964 | 0.0016 | 3.504  | 0.0604 | 0.2637 | 0.0034 | 1556 | 15  | 1528 | 14 | 1509 | 18 | 103.1 | 1556       | 15 |
| 641-49 | 564  | 1515 | 0.37 | 0.1591 | 0.0034 | 9.449  | 0.2029 | 0.4311 | 0.0059 | 2447 | 19  | 2383 | 20 | 2311 | 26 | 105.9 | 2447       | 19 |
| 641-50 | 799  | 598  | 1.34 | 0.1641 | 0.0035 | 9.890  | 0.2095 | 0.4374 | 0.0059 | 2498 | 19  | 2425 | 20 | 2339 | 27 | 106.8 | 2498       | 19 |
| 641-51 | 340  | 721  | 0.47 | 0.0688 | 0.0010 | 1.321  | 0.0211 | 0.1394 | 0.0018 | 892  | 15  | 855  | 9  | 841  | 10 | 101.7 | 841        | 10 |
| 641-52 | 532  | 578  | 0.92 | 0.0565 | 0.0020 | 0.5611 | 0.0192 | 0.0720 | 0.0012 | 473  | 48  | 452  | 12 | 448  | 7  | 100.9 | 448        | 7  |
| 641-53 | 67   | 908  | 0.07 | 0.0691 | 0.0015 | 1.259  | 0.0273 | 0.1323 | 0.0018 | 902  | 23  | 828  | 12 | 801  | 10 | 103.4 | 801        | 10 |
| 641-54 | 641  | 629  | 1.02 | 0.0683 | 0.0011 | 1.353  | 0.0233 | 0.1438 | 0.0019 | 878  | 17  | 869  | 10 | 866  | 11 | 100.3 | 866        | 11 |
| 641-55 | 169  | 379  | 0.45 | 0.1720 | 0.0021 | 11.668 | 0.1604 | 0.4920 | 0.0061 | 2578 | 10  | 2578 | 13 | 2579 | 26 | 100.0 | 2578       | 10 |
| 641-56 | 498  | 472  | 1.06 | 0.0665 | 0.0014 | 0.7808 | 0.0158 | 0.0851 | 0.0011 | 823  | 22  | 586  | 9  | 527  | 6  | 111.2 | Discordant |    |
| 641-57 | 166  | 352  | 0.47 | 0.1130 | 0.0023 | 5.101  | 0.1034 | 0.3275 | 0.0042 | 1848 | 19  | 1836 | 17 | 1826 | 20 | 101.2 | 1848       | 19 |
| 641-58 | 2083 | 3340 | 0.62 | 0.1596 | 0.0005 | 10.254 | 0.0672 | 0.4635 | 0.0030 | 2452 | 6   | 2458 | 6  | 2455 | 13 | 99.9  | 2452       | 6  |
| 641-59 | 821  | 2938 | 0.28 | 0.0644 | 0.0003 | 1.192  | 0.0065 | 0.1337 | 0.0004 | 753  | 10  | 797  | 3  | 809  | 2  | 98.5  | 809        | 2  |
| 641-60 | 515  | 975  | 0.53 | 0.0572 | 0.0065 | 0.6947 | 0.0768 | 0.0881 | 0.0020 | 498  | 257 | 536  | 46 | 544  | 12 | 98.5  | 544        | 12 |
| 641-61 | 129  | 3363 | 0.04 | 0.0977 | 0.0008 | 3.777  | 0.1025 | 0.2786 | 0.0059 | 1581 | 17  | 1588 | 22 | 1584 | 30 | 99.8  | 1581       | 17 |
| 641-62 | 265  | 403  | 0.66 | 0.1542 | 0.0010 | 0.715  | 0.0927 | 0.4087 | 0.0048 | 2393 | 11  | 2309 | 10 | 2209 | 22 | 108.3 | 2393       | 11 |
| 641-63 | 216  | 334  | 0.65 | 0.0577 | 0.0014 | 1.876  | 0.0332 | 0.1805 | 0.0027 | 1086 | 37  | 1073 | 12 | 1070 | 14 | 101.5 | 1086       | 37 |
| 641-64 | 454  | 734  | 0.62 | 0.0767 | 0.0009 | 2.028  | 0.0199 | 0.1907 | 0.0015 | 1114 | 23  | 1125 | 7  | 1125 | 8  | 99.0  | 1114       | 23 |
| 641-65 | 424  | 520  | 0.82 | 0.0626 | 0.0053 | 0.7337 | 0.0529 | 0.0863 | 0.0029 | 695  | 186 | 559  | 31 | 534  | 17 | 104.7 | 534        | 17 |

|        |      |      |      |        |        |        |        |        |        |      |     |      |    |      |    |       |      |    |
|--------|------|------|------|--------|--------|--------|--------|--------|--------|------|-----|------|----|------|----|-------|------|----|
| 642-19 | 138  | 43   | 3.23 | 0.0717 | 0.0033 | 1.601  | 0.0700 | 0.1620 | 0.0032 | 978  | 57  | 970  | 27 | 968  | 18 | 100.2 | 968  | 18 |
| 642-20 | 236  | 388  | 0.61 | 0.0739 | 0.0009 | 1.778  | 0.0210 | 0.1745 | 0.0023 | 1038 | 12  | 1037 | 8  | 1037 | 13 | 100.1 | 1038 | 12 |
| 642-21 | 76   | 86   | 0.88 | 0.1141 | 0.0020 | 5.253  | 0.0907 | 0.3340 | 0.0052 | 1865 | 14  | 1861 | 15 | 1858 | 25 | 100.4 | 1865 | 14 |
| 642-22 | 78   | 118  | 0.66 | 0.0733 | 0.0013 | 1.730  | 0.0292 | 0.1712 | 0.0024 | 1022 | 15  | 1020 | 11 | 1019 | 13 | 100.3 | 1022 | 15 |
| 642-23 | 285  | 280  | 1.01 | 0.1619 | 0.0040 | 9.808  | 0.2304 | 0.4396 | 0.0066 | 2476 | 21  | 2417 | 22 | 2349 | 30 | 105.4 | 2476 | 21 |
| 642-24 | 96   | 146  | 0.66 | 0.1511 | 0.0055 | 9.086  | 0.3145 | 0.4360 | 0.0083 | 2358 | 34  | 2347 | 32 | 2333 | 37 | 101.1 | 2358 | 34 |
| 642-25 | 160  | 159  | 1.01 | 0.0993 | 0.0016 | 3.880  | 0.0716 | 0.2834 | 0.0042 | 1611 | 31  | 1610 | 15 | 1609 | 21 | 100.1 | 1611 | 31 |
| 642-26 | 162  | 265  | 0.61 | 0.0954 | 0.0014 | 3.621  | 0.0612 | 0.2753 | 0.0038 | 1536 | 29  | 1554 | 13 | 1568 | 19 | 98.0  | 1536 | 29 |
| 642-27 | 114  | 125  | 0.91 | 0.0602 | 0.0017 | 0.8236 | 0.0228 | 0.0993 | 0.0015 | 610  | 62  | 610  | 13 | 610  | 9  | 100.0 | 610  | 9  |
| 642-28 | 243  | 1058 | 0.23 | 0.0684 | 0.0007 | 1.462  | 0.0164 | 0.1552 | 0.0021 | 879  | 12  | 915  | 7  | 930  | 12 | 98.4  | 930  | 12 |
| 642-29 | 136  | 161  | 0.85 | 0.0688 | 0.0018 | 1.366  | 0.0354 | 0.1440 | 0.0021 | 893  | 31  | 874  | 15 | 867  | 12 | 100.8 | 867  | 12 |
| 642-30 | 205  | 453  | 0.45 | 0.2359 | 0.0045 | 20.067 | 0.3834 | 0.6171 | 0.0078 | 3092 | 16  | 3095 | 18 | 3098 | 31 | 99.8  | 3092 | 16 |
| 642-31 | 941  | 1027 | 0.92 | 0.0652 | 0.0009 | 1.244  | 0.0181 | 0.1385 | 0.0017 | 780  | 14  | 821  | 8  | 836  | 10 | 98.2  | 836  | 10 |
| 642-32 | 418  | 204  | 2.05 | 0.0593 | 0.0011 | 0.7443 | 0.0136 | 0.0910 | 0.0012 | 578  | 19  | 565  | 8  | 562  | 7  | 100.5 | 562  | 7  |
| 642-33 | 60   | 62   | 0.96 | 0.0694 | 0.0022 | 1.297  | 0.0409 | 0.1357 | 0.0023 | 909  | 38  | 845  | 18 | 820  | 13 | 103.0 | 820  | 13 |
| 642-34 | 545  | 526  | 1.04 | 0.0710 | 0.0010 | 1.584  | 0.0246 | 0.1618 | 0.0021 | 958  | 14  | 964  | 10 | 967  | 12 | 99.7  | 967  | 12 |
| 642-35 | 197  | 133  | 1.49 | 0.0870 | 0.0016 | 2.798  | 0.0525 | 0.2332 | 0.0031 | 1361 | 18  | 1355 | 14 | 1351 | 16 | 100.7 | 1361 | 18 |
| 642-36 | 1142 | 553  | 2.06 | 0.0597 | 0.0010 | 0.7839 | 0.0141 | 0.0952 | 0.0013 | 593  | 18  | 588  | 8  | 586  | 8  | 100.3 | 586  | 8  |
| 642-37 | 68   | 63   | 1.08 | 0.0923 | 0.0015 | 3.152  | 0.0522 | 0.2476 | 0.0032 | 1474 | 15  | 1446 | 13 | 1426 | 16 | 103.4 | 1474 | 15 |
| 642-38 | 565  | 595  | 0.95 | 0.0749 | 0.0011 | 1.827  | 0.0289 | 0.1769 | 0.0022 | 1066 | 15  | 1055 | 10 | 1050 | 12 | 101.5 | 1066 | 15 |
| 642-39 | 118  | 357  | 0.33 | 0.0585 | 0.0011 | 0.5746 | 0.0112 | 0.0713 | 0.0009 | 548  | 22  | 461  | 7  | 444  | 5  | 103.8 | 444  | 5  |
| 642-40 | 235  | 208  | 1.13 | 0.1193 | 0.0021 | 5.695  | 0.1031 | 0.3463 | 0.0045 | 1946 | 16  | 1931 | 16 | 1917 | 22 | 101.5 | 1946 | 16 |
| 642-41 | 358  | 448  | 0.80 | 0.0979 | 0.0049 | 3.527  | 0.1796 | 0.2612 | 0.0057 | 1585 | 63  | 1533 | 40 | 1496 | 29 | 105.9 | 1585 | 63 |
| 642-42 | 469  | 256  | 1.83 | 0.1090 | 0.0088 | 4.691  | 0.3689 | 0.3119 | 0.0104 | 1783 | 95  | 1766 | 66 | 1750 | 51 | 101.9 | 1783 | 95 |
| 642-43 | 184  | 480  | 0.38 | 0.0688 | 0.0018 | 1.522  | 0.0408 | 0.1606 | 0.0026 | 892  | 30  | 939  | 16 | 960  | 14 | 97.8  | 960  | 14 |
| 642-44 | 392  | 253  | 1.55 | 0.0666 | 0.0017 | 1.181  | 0.0300 | 0.1286 | 0.0020 | 825  | 28  | 792  | 14 | 780  | 12 | 101.5 | 780  | 12 |
| 642-45 | 149  | 41   | 3.60 | 0.0564 | 0.0038 | 0.7207 | 0.0471 | 0.0927 | 0.0022 | 469  | 103 | 551  | 28 | 572  | 13 | 96.3  | 572  | 13 |
| 642-46 | 1009 | 658  | 1.53 | 0.0593 | 0.0017 | 0.6194 | 0.0174 | 0.0758 | 0.0012 | 576  | 35  | 489  | 11 | 471  | 7  | 103.8 | 471  | 7  |
| 642-47 | 52   | 83   | 0.63 | 0.0711 | 0.0024 | 1.246  | 0.0415 | 0.1273 | 0.0021 | 961  | 41  | 822  | 19 | 772  | 12 | 106.5 | 772  | 12 |
| 642-48 | 282  | 148  | 1.90 | 0.1929 | 0.0063 | 13.815 | 0.4363 | 0.5216 | 0.0093 | 2767 | 29  | 2737 | 30 | 2706 | 39 | 102.3 | 2767 | 29 |
| 642-49 | 366  | 868  | 0.42 | 0.0742 | 0.0013 | 1.670  | 0.0320 | 0.1634 | 0.0023 | 1046 | 18  | 997  | 12 | 976  | 13 | 102.2 | 976  | 13 |
| 642-50 | 615  | 1032 | 0.60 | 0.0730 | 0.0013 | 1.602  | 0.0303 | 0.1593 | 0.0022 | 1014 | 18  | 971  | 12 | 953  | 12 | 101.9 | 953  | 12 |
| 642-51 | 564  | 531  | 1.06 | 0.0598 | 0.0024 | 0.7292 | 0.0280 | 0.0886 | 0.0015 | 595  | 53  | 556  | 16 | 547  | 9  | 101.6 | 547  | 9  |
| 642-52 | 98   | 80   | 1.23 | 0.0688 | 0.0023 | 1.497  | 0.0491 | 0.1579 | 0.0026 | 892  | 41  | 929  | 20 | 945  | 14 | 98.3  | 945  | 14 |
| 642-53 | 193  | 237  | 0.81 | 0.0719 | 0.0015 | 1.528  | 0.0317 | 0.1543 | 0.0020 | 982  | 22  | 942  | 13 | 925  | 11 | 101.8 | 925  | 11 |
| 642-54 | 150  | 3044 | 0.05 | 0.0689 | 0.0010 | 1.502  | 0.0247 | 0.1583 | 0.0021 | 895  | 16  | 931  | 10 | 947  | 12 | 98.3  | 947  | 12 |
| 642-55 | 455  | 426  | 1.07 | 0.1576 | 0.0045 | 9.355  | 0.2591 | 0.4305 | 0.0064 | 2430 | 27  | 2373 | 25 | 2308 | 29 | 105.3 | 2430 | 27 |
| 642-56 | 93   | 106  | 0.88 | 0.0972 | 0.0051 | 3.721  | 0.1869 | 0.2775 | 0.0065 | 1572 | 59  | 1576 | 40 | 1579 | 33 | 99.6  | 1572 | 59 |
| 642-57 | 268  | 222  | 1.21 | 0.0561 | 0.0023 | 0.5500 | 0.0216 | 0.0711 | 0.0013 | 456  | 54  | 445  | 14 | 443  | 8  | 100.5 | 443  | 8  |
| 642-58 | 708  | 316  | 2.24 | 0.1226 | 0.0023 | 5.892  | 0.1079 | 0.3486 | 0.0043 | 1994 | 16  | 1960 | 16 | 1928 | 21 | 103.4 | 1994 | 16 |
| 642-59 | 200  | 177  | 1.13 | 0.0558 | 0.0036 | 0.5521 | 0.0344 | 0.0718 | 0.0017 | 445  | 97  | 446  | 22 | 447  | 10 | 99.8  | 447  | 10 |
| 642-60 | 272  | 198  | 1.37 | 0.1136 | 0.0017 | 5.152  | 0.0853 | 0.3288 | 0.0046 | 1858 | 13  | 1845 | 14 | 1832 | 22 | 101.4 | 1858 | 13 |
| 642-61 | 184  | 146  | 1.26 | 0.1567 | 0.0027 | 9.827  | 0.1843 | 0.4548 | 0.0064 | 2420 | 15  | 2419 | 17 | 2416 | 28 | 100.2 | 2420 | 15 |
| 642-62 | 501  | 2048 | 0.24 | 0.1533 | 0.0013 | 9.372  | 0.1551 | 0.4409 | 0.0057 | 2383 | 14  | 2375 | 15 | 2355 | 26 | 101.2 | 2383 | 14 |
| 642-63 | 108  | 159  | 0.68 | 0.1989 | 0.0058 | 14.455 | 0.3685 | 0.5322 | 0.0231 | 2817 | 49  | 2780 | 24 | 2751 | 97 | 102.4 | 2817 | 49 |
| 642-64 | 1484 | 2376 | 0.62 | 0.0560 | 0.0007 | 0.6007 | 0.0069 | 0.0774 | 0.0003 | 454  | 28  | 478  | 4  | 480  | 2  | 99.6  | 480  | 2  |
| 642-65 | 258  | 369  | 0.70 | 0.1052 | 0.0012 | 4.496  | 0.0558 | 0.3093 | 0.0023 | 1717 | 21  | 1730 | 10 | 1737 | 11 | 98.8  | 1717 | 21 |
| 642-66 | 284  | 451  | 0.63 | 0.1784 | 0.0019 | 12.826 | 0.2285 | 0.5112 | 0.0073 | 2638 | 18  | 2667 | 17 | 2662 | 31 | 99.1  | 2638 | 18 |

Sample JT86, biotite-quartz schist, Late Carboniferous matrix of the Wuwamen ophiolitic melange, (Wang et al., 2018, JGR Solid-Earth)

|    |     |      |      |        |        |        |        |        |        |      |    |      |    |      |    |       |            |    |
|----|-----|------|------|--------|--------|--------|--------|--------|--------|------|----|------|----|------|----|-------|------------|----|
| 1  | 68  | 263  | 0.26 | 0.0557 | 0.0018 | 0.5507 | 0.0178 | 0.0717 | 0.0010 | 442  | 48 | 445  | 12 | 446  | 6  | 99.8  | 446        | 6  |
| 2  | 328 | 446  | 0.74 | 0.0598 | 0.0015 | 0.5942 | 0.0151 | 0.0720 | 0.0010 | 597  | 33 | 474  | 10 | 448  | 6  | 105.8 | 448        | 6  |
| 3  | 105 | 477  | 0.22 | 0.0569 | 0.0015 | 0.4308 | 0.0116 | 0.0549 | 0.0007 | 489  | 37 | 364  | 8  | 344  | 4  | 105.8 | 344        | 4  |
| 4  | 60  | 453  | 0.13 | 0.0791 | 0.0023 | 0.9864 | 0.0254 | 0.0905 | 0.0012 | 1174 | 58 | 697  | 13 | 558  | 7  | 124.9 | Discordant |    |
| 5  | 83  | 440  | 0.19 | 0.0564 | 0.0015 | 0.4522 | 0.0120 | 0.0582 | 0.0008 | 468  | 36 | 379  | 8  | 364  | 5  | 104.1 | 364        | 5  |
| 6  | 147 | 131  | 1.12 | 0.0561 | 0.0030 | 0.4085 | 0.0217 | 0.0528 | 0.0008 | 457  | 92 | 348  | 16 | 332  | 5  | 104.8 | 332        | 5  |
| 7  | 198 | 318  | 0.62 | 0.0610 | 0.0016 | 0.6520 | 0.0172 | 0.0775 | 0.0010 | 641  | 34 | 510  | 11 | 481  | 6  | 106.0 | 481        | 6  |
| 8  | 92  | 435  | 0.21 | 0.0550 | 0.0016 | 0.4790 | 0.0138 | 0.0632 | 0.0008 | 412  | 41 | 397  | 9  | 395  | 5  | 100.5 | 395        | 5  |
| 9  | 187 | 363  | 0.52 | 0.0553 | 0.0015 | 0.5085 | 0.0142 | 0.0667 | 0.0009 | 424  | 39 | 417  | 10 | 416  | 5  | 100.2 | 416        | 5  |
| 10 | 208 | 343  | 0.61 | 0.0558 | 0.0016 | 0.5334 | 0.0152 | 0.0694 | 0.0009 | 443  | 40 | 434  | 10 | 432  | 6  | 100.5 | 432        | 6  |
| 11 | 212 | 313  | 0.68 | 0.0547 | 0.0017 | 0.4996 | 0.0154 | 0.0662 | 0.0009 | 400  | 45 | 411  | 10 | 413  | 5  | 99.5  | 413        | 5  |
| 12 | 277 | 460  | 0.60 | 0.0593 | 0.0015 | 0.5464 | 0.0144 | 0.0669 | 0.0009 | 576  | 35 | 443  | 9  | 417  | 5  | 106.2 | 417        | 5  |
| 13 | 844 | 620  | 1.36 | 0.0672 | 0.0015 | 0.9774 | 0.0228 | 0.1054 | 0.0014 | 845  | 28 | 692  | 12 | 646  | 8  | 107.1 | 646        | 8  |
| 14 | 172 | 517  | 0.33 | 0.0561 | 0.0017 | 0.4870 | 0.0147 | 0.0630 | 0.0008 | 456  | 43 | 403  | 10 | 394  | 5  | 102.3 | 394        | 5  |
| 15 | 128 | 369  | 0.35 | 0.0557 | 0.0016 | 0.5348 | 0.0155 | 0.0697 | 0.0009 | 439  | 41 | 435  | 10 | 434  | 6  | 100.2 | 434        | 6  |
| 16 | 254 | 276  | 0.92 | 0.1101 | 0.0043 | 4.481  | 0.1611 | 0.2953 | 0.0042 | 1800 | 72 | 1728 | 30 | 1668 | 21 | 107.9 | 1800       | 72 |
| 17 | 259 | 622  | 0.42 | 0.0587 | 0.0015 | 0.5623 | 0.0142 | 0.0695 | 0.0009 | 556  | 33 | 453  | 9  | 433  | 5  | 104.6 | 433        | 5  |
| 18 | 157 | 511  | 0.31 | 0.0557 | 0.0014 | 0.5329 | 0.0138 | 0.0694 | 0.0009 | 441  | 35 | 434  | 9  | 432  | 5  | 100.5 | 432        | 5  |
| 19 | 84  | 193  | 0.43 | 0.0534 | 0.0022 | 0.3857 | 0.0156 | 0.0524 | 0.0007 | 347  | 66 | 331  | 11 | 329  | 5  | 100.6 | 329        | 5  |
| 20 | 126 | 335  | 0.38 | 0.0705 | 0.0018 | 0.9561 | 0.0244 | 0.0984 | 0.0013 | 943  | 31 | 681  | 13 | 605  | 8  | 112.6 | Discordant |    |
| 21 | 146 | 419  | 0.35 | 0.0556 | 0.0015 | 0.5168 | 0.0142 | 0.0674 | 0.0009 | 438  | 38 | 423  | 9  | 420  | 5  | 100.7 | 420        | 5  |
| 22 | 219 | 476  | 0.46 | 0.0711 | 0.0017 | 1.367  | 0.0332 | 0.1395 | 0.0018 | 960  | 29 | 875  | 14 | 842  | 10 | 100.9 | 842        | 10 |
| 23 | 360 | 675  | 0.53 | 0.0572 | 0.0014 | 0.5570 | 0.0141 | 0.0707 | 0.0009 | 497  | 33 | 450  | 9  | 440  | 6  | 102.3 | 440        | 6  |
| 24 | 35  | 122  | 0.29 | 0.0599 | 0.0028 | 0.4978 | 0.0235 | 0.0603 | 0.0009 | 599  | 77 | 410  | 16 | 377  | 5  | 108.8 | 377        | 5  |
| 25 | 136 | 218  | 0.62 | 0.0566 | 0.0018 | 0.5647 | 0.0176 | 0.0723 | 0.0010 | 477  | 45 | 455  | 11 | 450  | 6  | 101.1 | 450        | 6  |
| 26 | 194 | 530  | 0.37 | 0.0771 | 0.0018 | 1.975  | 0.0477 | 0.1857 | 0.0024 | 1125 | 28 | 1107 | 16 | 1098 | 13 | 102.5 | 1125       | 28 |
| 27 | 352 | 778  | 0.45 | 0.0570 | 0.0015 | 0.5322 | 0.0142 | 0.0677 | 0.0009 | 492  | 36 | 433  | 9  | 422  | 5  | 102.6 | 422        | 5  |
| 28 | 157 | 480  | 0.33 | 0.0586 | 0.0016 | 0.5279 | 0.0147 | 0.0654 | 0.0009 | 551  | 38 | 430  | 10 | 408  | 5  | 105.4 | 408        | 5  |
| 29 | 70  | 257  | 0.27 | 0.0565 | 0.0020 | 0.5672 | 0.0197 | 0.0728 | 0.0010 | 471  | 53 | 456  | 13 | 453  | 6  | 100.7 | 453        | 6  |
| 30 | 125 | 260  | 0.48 | 0.0562 | 0.0020 | 0.5498 | 0.0192 | 0.0710 | 0.0010 | 460  | 53 | 445  | 13 | 442  | 6  | 100.7 | 442        | 6  |
| 31 | 143 | 378  | 0.38 | 0.0580 | 0.0017 | 0.5387 | 0.0163 | 0.0674 | 0.0009 | 530  | 43 | 438  | 11 | 420  | 5  | 104.3 | 420        | 5  |
| 32 | 164 | 419  | 0.39 | 0.0568 | 0.0017 | 0.5959 | 0.0179 | 0.0762 | 0.0010 | 482  | 43 | 475  | 11 | 473  | 6  | 104.4 | 473        | 6  |
| 33 | 98  | 152  | 0.64 | 0.0535 | 0.0029 | 0.3929 | 0.0209 | 0.0532 | 0.0008 | 351  | 93 | 336  | 15 | 334  | 5  | 100.6 | 334        | 5  |
| 34 | 142 | 371  | 0.38 | 0.0555 | 0.0018 | 0.4893 | 0.0157 | 0.0639 | 0.0009 | 433  | 47 | 404  | 11 | 399  | 5  | 101.3 | 399        | 5  |
| 35 | 22  | 235  | 0.09 | 0.0530 | 0.0019 | 0.3746 | 0.0135 | 0.0513 | 0.0007 | 329  | 56 | 323  | 10 | 322  | 4  | 100.3 | 322        | 4  |
| 36 | 71  | 234  | 0.30 | 0.0547 | 0.0019 | 0.4808 | 0.0169 | 0.0637 | 0.0009 | 400  | 53 | 399  | 12 | 399  | 5  | 100.3 | 398        | 5  |
| 37 | 241 | 726  | 0.33 | 0.0562 | 0.0016 | 0.5432 | 0.0153 | 0.0701 | 0.0009 | 461  | 39 | 441  | 10 | 437  | 6  | 100.9 | 437        | 6  |
| 38 | 155 | 316  | 0.49 | 0.0738 | 0.0020 | 1.450  | 0.0399 | 0.1426 | 0.0019 | 1035 | 34 | 910  | 17 | 859  | 11 | 105.9 | 859        | 11 |
| 39 | 226 | 335  | 0.67 | 0.0568 | 0.0019 | 0.5992 | 0.0198 | 0.0765 | 0.0010 | 483  | 49 | 477  | 13 | 475  | 6  | 100.4 | 475        | 6  |
| 40 | 128 | 166  | 0.77 | 0.0636 | 0.0021 | 1.025  | 0.0338 | 0.1170 | 0.0016 | 727  | 46 | 717  | 17 | 713  | 9  | 100.6 | 713        | 9  |
| 41 | 77  | 554  | 0.14 | 0.0549 | 0.0017 | 0.4354 | 0.0135 | 0.0575 | 0.0008 | 409  | 45 | 367  | 10 | 360  | 5  | 101.9 | 360        | 5  |
| 42 | 221 | 315  | 0.70 | 0.0587 | 0.0018 | 0.5951 | 0.0184 | 0.0735 | 0.0010 | 557  | 44 | 474  | 12 | 457  | 6  | 103.7 | 457        | 6  |
| 43 | 226 | 792  | 0.29 | 0.0557 | 0.0016 | 0.5098 | 0.0145 | 0.0664 | 0.0009 | 438  | 40 | 418  | 10 | 415  | 5  | 100.7 | 415        | 5  |
| 44 | 344 | 623  | 0.55 | 0.0561 | 0.0017 | 0.5744 | 0.0170 | 0.0742 | 0.0010 | 458  | 42 | 461  | 11 | 461  | 6  | 100.0 | 461        | 6  |
| 45 | 175 | 572  | 0.31 | 0.0556 | 0.0016 | 0.5637 | 0.0164 | 0.0735 | 0.0010 | 437  | 41 | 454  | 11 | 457  | 6  | 99.3  | 457        | 6  |
| 46 | 135 | 236  | 0.57 | 0.0600 | 0.0024 | 0.4212 | 0.0165 | 0.0510 | 0.0007 | 602  | 60 | 357  | 12 | 320  | 4  | 111.6 | Discordant |    |
| 47 | 144 | 366  | 0.39 | 0.1431 | 0.0050 | 5.276  | 0.1702 | 0.2674 | 0.0038 | 2265 | 62 | 1865 | 28 | 1528 | 19 | 148.2 | Discordant |    |
| 48 | 64  | 131  | 0.49 | 0.0552 | 0.0022 | 0.5794 | 0.0228 | 0.0762 | 0.0011 | 418  | 61 | 464  | 15 | 473  | 7  | 98.1  | 473        | 7  |
| 49 | 203 | 367  | 0.55 | 0.0565 | 0.0019 | 0.5874 | 0.0190 | 0.0754 | 0.0010 | 472  | 47 | 469  | 12 | 469  | 6  | 100.0 | 469        | 6  |
| 50 | 93  | 480  | 0.20 | 0.0551 | 0.0018 | 0.4901 | 0.0162 | 0.0646 | 0.0009 | 414  | 49 | 405  | 11 | 403  | 5  | 100.5 | 403        | 5  |
| 51 | 167 | 445  | 0.37 | 0.0542 | 0.0017 | 0.5577 | 0.0175 | 0.0746 | 0.0010 | 379  | 46 | 450  | 11 | 464  | 6  | 97.0  | 464        | 6  |
| 52 | 97  | 552  | 0.18 | 0.0654 | 0.0020 | 1.003  | 0.0299 | 0.1113 | 0.0015 | 787  | 40 | 705  | 15 | 680  | 9  | 103.7 | 680        | 9  |
| 53 | 68  | 412  | 0.17 | 0.0613 | 0.0020 | 0.6271 | 0.0201 | 0.0741 | 0.0010 | 651  | 45 | 494  | 13 | 461  | 6  | 107.2 | 461        | 6  |
| 54 | 693 | 615  | 1.13 | 0.0564 | 0.0018 | 0.5702 | 0.0177 | 0.0734 | 0.0010 | 467  | 45 | 458  | 11 | 456  | 6  | 100.4 | 456        | 6  |
| 55 | 124 | 631  | 0.20 | 0.0551 | 0.0017 | 0.4930 | 0.0154 | 0.0649 | 0.0009 | 417  | 45 | 407  | 10 | 405  | 5  | 100.5 | 405        | 5  |
| 56 | 28  | 76   | 0.37 | 0.2511 | 0.0087 | 12.898 | 0.4088 | 0.3726 | 0.0053 | 3192 | 56 | 2672 | 30 | 2042 | 25 | 156.3 | Discordant |    |
| 57 | 119 | 455  | 0.26 | 0.0542 | 0.0019 | 0.4478 | 0.0152 | 0.0599 | 0.0008 | 380  | 51 | 376  | 11 | 375  | 5  | 100.3 | 375        | 5  |
| 58 | 155 | 547  | 0.28 | 0.0558 | 0.0018 | 0.5444 | 0.0174 | 0.0708 | 0.0010 | 444  | 47 | 441  | 11 | 441  | 6  | 100.0 | 441        | 6  |
| 59 | 182 | 318  | 0.57 | 0.0596 | 0.0023 | 0.5415 | 0.0203 | 0.0659 | 0.0009 | 589  | 56 | 439  | 13 | 411  | 6  | 106.8 | 411        | 6  |
| 60 | 145 | 167  | 0.87 | 0.0595 | 0.0021 | 0.7520 | 0.0266 | 0.0916 | 0.0013 | 587  | 52 | 569  | 15 | 565  | 8  | 100.7 | 565        | 8  |
| 61 | 93  | 416  | 0.22 | 0.0851 | 0.0027 | 2.027  | 0.0635 | 0.1729 | 0.0024 | 1317 | 40 | 1125 | 21 | 1028 | 13 | 128.1 | Discordant |    |
| 62 | 186 | 351  | 0.53 | 0.0564 | 0.0021 | 0.5650 | 0.0204 | 0.0726 | 0.0010 | 469  | 55 | 455  | 13 | 452  | 6  | 100.7 | 452        | 6  |
| 63 | 160 | 310  | 0.52 | 0.0549 | 0.0020 | 0.5510 | 0.0198 | 0.0727 | 0.0010 | 410  | 55 | 446  | 13 | 453  | 6  | 98.5  | 453        | 6  |
| 64 | 102 | 1130 | 0.09 | 0.0527 | 0.0017 | 0.3727 | 0.0121 | 0.0513 | 0.0007 | 315  | 49 | 322  | 9  | 322  | 4  | 100.0 | 322        | 4  |
| 65 | 80  | 371  | 0.22 | 0.0571 | 0.0021 | 0.4934 | 0.0177 | 0.0627 | 0.0009 | 493  | 54 | 407  | 12 | 392  | 5  | 103.8 | 392        | 5  |
| 66 | 103 | 267  | 0.39 | 0.0611 | 0.0022 | 0.7130 | 0.0252 | 0.0846 | 0.0012 | 644  | 51 | 547  | 15 | 523  | 7  | 104.6 | 523        | 7  |
| 67 | 3   | 394  | 0.01 | 0.0531 | 0.0020 | 0.3712 | 0.0140 | 0.0507 | 0.0007 | 331  | 59 | 321  | 10 | 319  | 4  | 100.6 | 319        | 4  |
| 68 | 117 | 137  | 0.85 | 0.0955 | 0.0033 | 2.935  | 0.0995 | 0.2228 | 0.0032 | 1538 | 42 | 1391 | 26 | 1296 | 17 | 118.7 | Discordant |    |
| 69 | 118 | 220  | 0.54 | 0.0561 | 0.0021 | 0.5632 | 0.0209 | 0.0729 | 0.0011 | 455  | 56 | 454  | 14 | 453  | 6  | 100.2 | 453        | 6  |

|    |     |     |      |        |        |        |        |        |        |     |    |     |    |     |   |       |     |   |
|----|-----|-----|------|--------|--------|--------|--------|--------|--------|-----|----|-----|----|-----|---|-------|-----|---|
| 70 | 255 | 377 | 0.68 | 0.0581 | 0.0022 | 0.5185 | 0.0189 | 0.0647 | 0.0009 | 533 | 55 | 424 | 13 | 404 | 6 | 105.0 | 404 | 6 |
| 71 | 84  | 448 | 0.19 | 0.0552 | 0.0021 | 0.4759 | 0.0174 | 0.0626 | 0.0009 | 418 | 56 | 395 | 12 | 391 | 5 | 101.0 | 391 | 5 |
| 72 | 682 | 707 | 0.96 | 0.0556 | 0.0020 | 0.5627 | 0.0194 | 0.0734 | 0.0010 | 435 | 52 | 453 | 13 | 457 | 6 | 99.1  | 457 | 6 |
| 73 | 160 | 282 | 0.57 | 0.0539 | 0.0021 | 0.4425 | 0.0170 | 0.0596 | 0.0009 | 365 | 60 | 372 | 12 | 373 | 5 | 99.7  | 373 | 5 |
| 74 | 247 | 520 | 0.47 | 0.0570 | 0.0021 | 0.6020 | 0.0213 | 0.0766 | 0.0011 | 491 | 53 | 478 | 13 | 476 | 7 | 100.4 | 476 | 7 |

Sample 12TS47-2, meta-sandstone, Carboniferous matrix of the Wuwamen ophiolitic melange, (Wang et al., 2017, GSA Bulletin)

|    |      |        |        |        |        |        |        |      |    |      |   |      |    |       |            |   |
|----|------|--------|--------|--------|--------|--------|--------|------|----|------|---|------|----|-------|------------|---|
| 1  | 0.73 | 0.0558 | 0.0001 | 0.5287 | 0.0085 | 0.0687 | 0.0011 | 456  | 6  | 431  | 6 | 428  | 7  | 100.7 | 428        | 7 |
| 2  | 0.82 | 0.0541 | 0.0005 | 0.4326 | 0.0045 | 0.0580 | 0.0003 | 376  | 20 | 365  | 3 | 363  | 2  | 100.6 | 363        | 2 |
| 3  | 0.55 | 0.0553 | 0.0002 | 0.5020 | 0.0026 | 0.0658 | 0.0003 | 433  | 9  | 413  | 2 | 411  | 2  | 100.5 | 411        | 2 |
| 4  | 1.11 | 0.0556 | 0.0001 | 0.5232 | 0.0041 | 0.0682 | 0.0005 | 439  | 6  | 427  | 3 | 425  | 3  | 100.5 | 425        | 3 |
| 5  | 0.42 | 0.0559 | 0.0001 | 0.5277 | 0.0048 | 0.0685 | 0.0007 | 456  | 3  | 430  | 3 | 427  | 4  | 100.7 | 427        | 4 |
| 6  | 0.40 | 0.0561 | 0.0001 | 0.5484 | 0.0077 | 0.0709 | 0.0010 | 457  | 4  | 444  | 5 | 441  | 6  | 100.7 | 441        | 6 |
| 7  | 0.54 | 0.0550 | 0.0002 | 0.4746 | 0.0022 | 0.0626 | 0.0003 | 413  | 6  | 394  | 2 | 392  | 2  | 100.5 | 392        | 2 |
| 8  | 0.62 | 0.0563 | 0.0002 | 0.5564 | 0.0044 | 0.0717 | 0.0005 | 465  | 10 | 449  | 3 | 446  | 3  | 100.7 | 446        | 3 |
| 9  | 0.66 | 0.0563 | 0.0001 | 0.5556 | 0.0036 | 0.0715 | 0.0004 | 465  | 8  | 449  | 2 | 445  | 3  | 100.9 | 445        | 3 |
| 10 | 0.47 | 0.0540 | 0.0002 | 0.4186 | 0.0036 | 0.0562 | 0.0005 | 369  | 14 | 355  | 3 | 353  | 3  | 100.6 | 353        | 3 |
| 11 | 0.55 | 0.0542 | 0.0002 | 0.4251 | 0.0028 | 0.0568 | 0.0003 | 389  | 9  | 360  | 2 | 356  | 2  | 101.1 | 356        | 2 |
| 12 | 0.57 | 0.0807 | 0.0001 | 2.096  | 0.0206 | 0.1884 | 0.0019 | 1213 | 3  | 1147 | 7 | 1113 | 10 | 109.0 | 1213       | 3 |
| 13 | 0.72 | 0.0569 | 0.0002 | 0.5937 | 0.0066 | 0.0756 | 0.0008 | 500  | 7  | 473  | 4 | 470  | 5  | 100.6 | 470        | 5 |
| 14 | 0.31 | 0.0552 | 0.0001 | 0.4992 | 0.0050 | 0.0656 | 0.0007 | 420  | 8  | 411  | 3 | 410  | 4  | 100.2 | 410        | 4 |
| 15 | 1.44 | 0.0537 | 0.0001 | 0.4200 | 0.0040 | 0.0567 | 0.0005 | 367  | 4  | 356  | 3 | 356  | 3  | 100.0 | 356        | 3 |
| 16 | 0.65 | 0.0557 | 0.0001 | 0.5211 | 0.0035 | 0.0679 | 0.0005 | 439  | 4  | 426  | 2 | 423  | 3  | 100.7 | 423        | 3 |
| 17 | 1.16 | 0.0563 | 0.0001 | 0.5572 | 0.0039 | 0.0717 | 0.0005 | 465  | 6  | 450  | 3 | 447  | 3  | 100.7 | 447        | 3 |
| 18 | 0.96 | 0.0538 | 0.0001 | 0.4184 | 0.0023 | 0.0564 | 0.0003 | 365  | 1  | 355  | 2 | 353  | 2  | 100.6 | 353        | 2 |
| 19 | 0.49 | 0.0560 | 0.0001 | 0.5310 | 0.0037 | 0.0687 | 0.0005 | 454  | 6  | 433  | 2 | 428  | 3  | 101.2 | 428        | 3 |
| 20 | 0.57 | 0.0575 | 0.0003 | 0.6352 | 0.0048 | 0.0801 | 0.0004 | 509  | 11 | 499  | 3 | 497  | 3  | 100.4 | 497        | 3 |
| 21 | 0.64 | 0.0557 | 0.0001 | 0.5286 | 0.0054 | 0.0688 | 0.0007 | 439  | 4  | 431  | 4 | 429  | 4  | 100.5 | 429        | 4 |
| 22 | 0.70 | 0.0555 | 0.0001 | 0.5264 | 0.0041 | 0.0688 | 0.0005 | 432  | 4  | 429  | 3 | 429  | 3  | 100.0 | 429        | 3 |
| 23 | 0.50 | 0.0539 | 0.0002 | 0.4200 | 0.0057 | 0.0565 | 0.0008 | 369  | 7  | 356  | 4 | 354  | 5  | 100.6 | 354        | 5 |
| 24 | 0.67 | 0.0561 | 0.0002 | 0.5321 | 0.0044 | 0.0687 | 0.0005 | 457  | 7  | 433  | 3 | 428  | 3  | 101.2 | 428        | 3 |
| 25 | 0.62 | 0.0539 | 0.0001 | 0.4225 | 0.0053 | 0.0569 | 0.0007 | 369  | 6  | 358  | 4 | 356  | 4  | 100.6 | 356        | 4 |
| 26 | 0.64 | 0.0557 | 0.0001 | 0.5267 | 0.0065 | 0.0685 | 0.0008 | 443  | 8  | 430  | 4 | 427  | 5  | 100.7 | 427        | 5 |
| 27 | 0.29 | 0.0556 | 0.0001 | 0.5267 | 0.0061 | 0.0687 | 0.0008 | 435  | 6  | 430  | 4 | 428  | 5  | 100.5 | 428        | 5 |
| 28 | 0.61 | 0.0547 | 0.0001 | 0.4964 | 0.0071 | 0.0657 | 0.0009 | 467  | 7  | 409  | 5 | 410  | 5  | 99.8  | 410        | 5 |
| 29 | 0.50 | 0.0608 | 0.0003 | 0.6667 | 0.0053 | 0.0796 | 0.0005 | 632  | 11 | 519  | 3 | 494  | 3  | 105.1 | 494        | 3 |
| 30 | 0.44 | 0.0563 | 0.0002 | 0.5557 | 0.0042 | 0.0715 | 0.0006 | 465  | 7  | 449  | 3 | 445  | 3  | 100.9 | 445        | 3 |
| 31 | 0.53 | 0.0856 | 0.0011 | 0.6108 | 0.0092 | 0.0517 | 0.0004 | 1331 | 24 | 484  | 6 | 325  | 2  | 148.9 | Discordant |   |
| 32 | 0.42 | 0.0555 | 0.0001 | 0.5224 | 0.0067 | 0.0684 | 0.0009 | 432  | 1  | 427  | 4 | 426  | 5  | 100.2 | 426        | 5 |
| 33 | 0.68 | 0.0547 | 0.0001 | 0.4797 | 0.0054 | 0.0636 | 0.0007 | 467  | 4  | 398  | 4 | 397  | 4  | 100.3 | 397        | 4 |
| 34 | 0.83 | 0.0565 | 0.0002 | 0.5662 | 0.0044 | 0.0728 | 0.0006 | 472  | 7  | 456  | 3 | 453  | 4  | 100.7 | 453        | 4 |
| 35 | 1.05 | 0.0549 | 0.0001 | 0.5194 | 0.0029 | 0.0686 | 0.0004 | 406  | 27 | 425  | 2 | 428  | 2  | 99.3  | 428        | 2 |
| 36 | 0.65 | 0.0559 | 0.0001 | 0.5264 | 0.0047 | 0.0683 | 0.0006 | 456  | 4  | 429  | 3 | 426  | 4  | 100.7 | 426        | 4 |
| 37 | 0.52 | 0.0545 | 0.0001 | 0.4957 | 0.0032 | 0.0659 | 0.0004 | 394  | 6  | 409  | 2 | 412  | 2  | 99.3  | 412        | 2 |
| 38 | 0.61 | 0.0548 | 0.0001 | 0.4961 | 0.0042 | 0.0656 | 0.0005 | 406  | 6  | 409  | 3 | 410  | 3  | 99.8  | 410        | 3 |
| 39 | 0.28 | 0.0545 | 0.0001 | 0.2567 | 0.0031 | 0.0342 | 0.0004 | 391  | 4  | 232  | 2 | 217  | 3  | 106.9 | 217        | 3 |
| 40 | 0.52 | 0.0543 | 0.0001 | 0.5150 | 0.0038 | 0.0688 | 0.0005 | 383  | 1  | 422  | 3 | 429  | 3  | 98.4  | 429        | 3 |
| 41 | 0.50 | 0.0545 | 0.0001 | 0.5176 | 0.0041 | 0.0689 | 0.0006 | 391  | 4  | 424  | 3 | 430  | 3  | 98.6  | 430        | 3 |
| 42 | 1.05 | 0.0522 | 0.0002 | 0.4055 | 0.0020 | 0.0564 | 0.0002 | 295  | 11 | 346  | 1 | 353  | 1  | 98.0  | 353        | 1 |
| 43 | 0.56 | 0.0525 | 0.0001 | 0.4079 | 0.0019 | 0.0564 | 0.0003 | 306  | 4  | 347  | 1 | 354  | 2  | 98.0  | 354        | 2 |
| 44 | 0.57 | 0.0552 | 0.0001 | 0.5227 | 0.0049 | 0.0687 | 0.0007 | 420  | 6  | 427  | 3 | 428  | 4  | 99.8  | 428        | 4 |
| 45 | 0.82 | 0.0521 | 0.0001 | 0.4046 | 0.0027 | 0.0564 | 0.0004 | 287  | 8  | 345  | 2 | 354  | 2  | 97.5  | 354        | 2 |
| 46 | 0.67 | 0.0585 | 0.0001 | 0.7687 | 0.0071 | 0.0952 | 0.0009 | 550  | 4  | 579  | 4 | 586  | 5  | 98.8  | 586        | 5 |
| 47 | 1.15 | 0.0539 | 0.0001 | 0.4920 | 0.0036 | 0.0662 | 0.0005 | 365  | 4  | 406  | 2 | 413  | 3  | 98.3  | 413        | 3 |
| 48 | 0.76 | 0.0521 | 0.0001 | 0.4053 | 0.0029 | 0.0564 | 0.0004 | 300  | 6  | 346  | 2 | 354  | 3  | 97.7  | 354        | 3 |
| 49 | 0.74 | 0.0548 | 0.0002 | 0.4712 | 0.0040 | 0.0624 | 0.0004 | 467  | 11 | 392  | 3 | 390  | 3  | 100.5 | 390        | 3 |
| 50 | 0.37 | 0.0526 | 0.0001 | 0.4796 | 0.0029 | 0.0661 | 0.0005 | 309  | 8  | 398  | 2 | 413  | 3  | 96.4  | 413        | 3 |
| 51 | 0.41 | 0.0527 | 0.0001 | 0.4807 | 0.0047 | 0.0661 | 0.0007 | 317  | 6  | 399  | 3 | 413  | 4  | 96.6  | 413        | 4 |
| 52 | 0.38 | 0.0518 | 0.0001 | 0.4045 | 0.0051 | 0.0566 | 0.0007 | 276  | 25 | 345  | 4 | 355  | 4  | 97.2  | 355        | 4 |
| 53 | 0.42 | 0.0551 | 0.0002 | 0.5215 | 0.0039 | 0.0686 | 0.0004 | 417  | 14 | 426  | 3 | 427  | 3  | 99.8  | 427        | 3 |
| 54 | 1.18 | 0.0538 | 0.0001 | 0.4903 | 0.0075 | 0.0661 | 0.0010 | 361  | 7  | 405  | 5 | 413  | 6  | 98.1  | 413        | 6 |
| 55 | 0.39 | 0.0541 | 0.0002 | 0.4913 | 0.0051 | 0.0658 | 0.0007 | 376  | 10 | 406  | 3 | 411  | 4  | 98.8  | 411        | 4 |
| 56 | 1.01 | 0.0551 | 0.0001 | 0.5489 | 0.0067 | 0.0721 | 0.0009 | 417  | 10 | 444  | 4 | 449  | 5  | 98.9  | 449        | 5 |
| 57 | 0.60 | 0.0543 | 0.0001 | 0.5148 | 0.0047 | 0.0687 | 0.0007 | 383  | 1  | 422  | 3 | 428  | 4  | 98.6  | 428        | 4 |
| 58 | 0.45 | 0.0543 | 0.0002 | 0.4967 | 0.0063 | 0.0663 | 0.0009 | 383  | 7  | 409  | 4 | 414  | 5  | 98.8  | 414        | 5 |
| 59 | 0.59 | 0.0547 | 0.0001 | 0.5206 | 0.0058 | 0.0689 | 0.0008 | 467  | 6  | 426  | 4 | 430  | 5  | 99.1  | 430        | 5 |
| 60 | 0.62 | 0.0549 | 0.0003 | 0.5459 | 0.0046 | 0.0721 | 0.0006 | 409  | 11 | 442  | 3 | 449  | 3  | 98.4  | 449        | 3 |
| 61 | 0.41 | 0.0551 | 0.0002 | 0.5247 | 0.0067 | 0.0689 | 0.0008 | 417  | 12 | 428  | 4 | 430  | 5  | 99.5  | 430        | 5 |
| 62 | 0.82 | 0.0550 | 0.0001 | 0.5451 | 0.0054 | 0.0719 | 0.0007 | 409  | 6  | 442  | 4 | 447  | 4  | 98.9  | 447        | 4 |
| 63 | 0.50 | 0.0546 | 0.0001 | 0.5209 | 0.0045 | 0.0691 | 0.0006 | 398  | 36 | 426  | 3 | 431  | 4  | 98.8  | 431        | 4 |
| 64 | 0.54 | 0.0547 | 0.0001 | 0.5218 | 0.0055 | 0.0691 | 0.0007 | 467  | 6  | 426  | 4 | 431  | 4  | 98.8  | 431        | 4 |
| 65 | 0.62 | 0.0551 | 0.0002 | 0.4995 | 0.0037 | 0.0656 | 0.0004 | 417  | 9  | 411  | 2 | 410  | 2  | 100.2 | 410        | 2 |

Sample 12TS47-4, meta-sandstone, Carboniferous matrix of the Wuwamen ophiolitic melange, (Wang et al., 2017, GSA Bulletin)

|    |  |      |        |        |        |        |        |        |      |      |      |   |      |    |       |            |    |
|----|--|------|--------|--------|--------|--------|--------|--------|------|------|------|---|------|----|-------|------------|----|
| 2  |  | 0.60 | 0.0554 | 0.0002 | 0.5174 | 0.0070 | 0.0677 | 0.0009 | 428  | 1    | 423  | 5 | 422  | 5  | 100.2 | 422        | 5  |
| 3  |  | 0.65 | 0.0560 | 0.0001 | 0.5503 | 0.0124 | 0.0713 | 0.0016 | 454  | 1    | 445  | 8 | 444  | 10 | 100.2 | 444        | 10 |
| 4  |  | 0.84 | 0.0560 | 0.0003 | 0.4219 | 0.0028 | 0.0546 | 0.0003 | 454  | 11   | 357  | 2 | 343  | 2  | 104.1 | 343        | 2  |
| 5  |  | 0.68 | 0.0561 | 0.0001 | 0.3853 | 0.0020 | 0.0498 | 0.0003 | 457  | 4    | 331  | 1 | 313  | 2  | 105.8 | 313        | 2  |
| 6  |  | 0.64 | 0.0556 | 0.0001 | 0.5250 | 0.0048 | 0.0684 | 0.0006 | 435  | 4    | 429  | 3 | 427  | 4  | 100.5 | 427        | 4  |
| 7  |  | 0.51 | 0.0884 | 0.0001 | 2.875  | 0.0130 | 0.2356 | 0.0010 | 1392 | 3    | 1375 | 3 | 1364 | 5  | 102.1 | 1392       | 3  |
| 8  |  | 0.27 | 0.0547 | 0.0001 | 0.4753 | 0.0084 | 0.0629 | 0.0011 | 467  | 34   | 395  | 6 | 393  | 7  | 100.5 | 393        | 7  |
| 9  |  | 0.56 | 0.0557 | 0.0001 | 0.5214 | 0.0042 | 0.0679 | 0.0005 | 439  | 4    | 426  | 3 | 423  | 3  | 100.7 | 423        | 3  |
| 10 |  | 1.05 | 0.0555 | 0.0002 | 0.5198 | 0.0033 | 0.0678 | 0.0004 | 435  | 5    | 425  | 2 | 423  | 2  | 100.5 | 423        | 2  |
| 11 |  | 0.60 | 0.0557 | 0.0001 | 0.5233 | 0.0031 | 0.0681 | 0.0004 | 439  | 10   | 427  | 2 | 425  | 2  | 100.5 | 425        | 2  |
| 12 |  | 0.86 | 0.0554 | 0.0001 | 0.5182 | 0.0040 | 0.0678 | 0.0005 | 428  | (1)  | 424  | 3 | 423  | 3  | 100.2 | 423        | 3  |
| 13 |  | 1.20 | 0.0606 | 0.0001 | 0.4317 | 0.0028 | 0.0516 | 0.0003 | 633  | 4    | 364  | 2 | 324  | 2  | 112.3 | Discordant |    |
| 14 |  | 0.45 | 0.0554 | 0.0001 | 0.5109 | 0.0046 | 0.0668 | 0.0006 | 428  | (1)  | 419  | 3 | 417  | 4  | 100.5 | 417        | 4  |
| 15 |  | 0.56 | 0.0555 | 0.0001 | 0.5135 | 0.0044 | 0.0671 | 0.0006 | 432  | 1    | 421  | 3 | 419  | 3  | 100.5 | 419        | 3  |
| 16 |  | 0.50 | 0.0555 | 0.0001 | 0.5176 | 0.0058 | 0.0676 | 0.0008 | 432  | 4    | 424  | 4 | 422  | 5  | 100.5 | 422        | 5  |
| 17 |  | 0.63 | 0.0568 | 0.0002 | 0.6050 | 0.0042 | 0.0772 | 0.0005 | 483  | 12   | 480  | 3 | 480  | 3  | 100.0 | 480        | 3  |
| 18 |  | 0.68 | 0.0596 | 0.0002 | 0.6590 | 0.0065 | 0.0801 | 0.0008 | 591  | 6    | 514  | 4 | 497  | 5  | 103.4 | 497        | 5  |
| 19 |  | 0.67 | 0.0559 | 0.0002 | 0.5485 | 0.0040 | 0.0711 | 0.0005 | 456  | 6    | 444  | 3 | 443  | 3  | 100.2 | 443        | 3  |
| 20 |  | 1.99 | 0.0554 | 0.0001 | 0.5165 | 0.0049 | 0.0675 | 0.0006 | 432  | 1    | 423  | 3 | 421  | 4  | 100.5 | 421        | 4  |
| 21 |  | 0.72 | 0.0556 | 0.0002 | 0.5211 | 0.0058 | 0.0679 | 0.0008 | 435  | 7    | 426  | 4 | 424  | 5  | 100.5 | 424        | 5  |
| 22 |  | 0.60 | 0.0556 | 0.0002 | 0.5372 | 0.0071 | 0.0700 | 0.0009 | 439  | 6    | 437  | 5 | 436  | 6  | 100.2 | 436        | 6  |
| 23 |  | 0.82 | 0.0555 | 0.0002 | 0.5181 | 0.0059 | 0.0676 | 0.0007 | 432  | 3    | 424  | 4 | 421  | 5  | 100.7 | 421        | 5  |
| 24 |  | 0.88 | 0.0532 | 0.0003 | 0.3826 | 0.0037 | 0.0520 | 0.0004 | 339  | 13   | 329  | 3 | 327  | 2  | 100.6 | 327        | 2  |
| 25 |  | 0.57 | 0.0553 | 0.0002 | 0.5143 | 0.0056 | 0.0674 | 0.0007 | 433  | 9    | 421  | 4 | 420  | 4  | 100.2 | 420        | 4  |
| 26 |  | 0.70 | 0.0560 | 0.0001 | 0.5614 | 0.0052 | 0.0726 | 0.0007 | 450  | 1    | 452  | 3 | 452  | 4  | 100.0 | 452        | 4  |
| 27 |  | 0.52 | 0.0549 | 0.0002 | 0.5111 | 0.0055 | 0.0673 | 0.0007 | 409  | (25) | 419  | 4 | 420  | 4  | 99.8  | 420        | 4  |
| 28 |  | 0.85 | 0.0554 | 0.0002 | 0.5189 | 0.0047 | 0.0678 | 0.0007 | 428  | 7    | 424  | 3 | 423  | 4  | 100.2 | 423        | 4  |
| 29 |  | 0.40 | 0.0545 | 0.0002 | 0.4718 | 0.0044 | 0.0626 | 0.0006 | 391  | 7    | 392  | 3 | 392  | 4  | 100.0 | 392        | 4  |
| 30 |  | 0.69 | 0.0532 | 0.0002 | 0.3963 | 0.0047 | 0.0539 | 0.0007 | 339  | 11   | 339  | 3 | 338  | 4  | 100.3 | 338        | 4  |
| 31 |  | 0.82 | 0.0540 | 0.0002 | 0.4614 | 0.0039 | 0.0617 | 0.0005 | 372  | 12   | 385  | 3 | 386  | 3  | 99.7  | 386        | 3  |
| 32 |  | 0.83 | 0.0546 | 0.0002 | 0.4842 | 0.0045 | 0.0641 | 0.0006 | 398  | 7    | 401  | 3 | 400  | 4  | 100.3 | 400        | 4  |
| 33 |  | 1.24 | 0.0547 | 0.0002 | 0.4826 | 0.0045 | 0.0639 | 0.0006 | 398  | 7    | 400  | 3 | 399  | 4  | 100.3 | 399        | 4  |
| 34 |  | 0.67 | 0.0552 | 0.0002 | 0.5125 | 0.0054 | 0.0672 | 0.0007 | 420  | 9    | 420  | 4 | 419  | 4  | 100.2 | 419        | 4  |
| 35 |  | 0.61 | 0.0551 | 0.0002 | 0.5126 | 0.0041 | 0.0673 | 0.0005 | 413  | 7    | 420  | 3 | 420  | 3  | 100.0 | 420        | 3  |
| 36 |  | 0.67 | 0.0549 | 0.0001 | 0.4955 | 0.0052 | 0.0653 | 0.0007 | 409  | (27) | 409  | 4 | 408  | 4  | 100.2 | 408        | 4  |
| 37 |  | 0.78 | 0.0550 | 0.0002 | 0.4951 | 0.0055 | 0.0652 | 0.0007 | 409  | (25) | 408  | 4 | 407  | 4  | 100.0 | 407        | 4  |
| 38 |  | 0.76 | 0.0551 | 0.0002 | 0.5082 | 0.0057 | 0.0668 | 0.0007 | 413  | 6    | 417  | 4 | 417  | 4  | 100.2 | 417        | 4  |
| 39 |  | 0.45 | 0.0553 | 0.0001 | 0.5174 | 0.0043 | 0.0678 | 0.0006 | 433  | 6    | 423  | 3 | 423  | 3  | 100.0 | 423        | 3  |
| 40 |  | 0.51 | 0.0549 | 0.0001 | 0.4864 | 0.0029 | 0.0642 | 0.0004 | 406  | (27) | 402  | 2 | 401  | 2  | 100.2 | 401        | 2  |
| 41 |  | 0.65 | 0.0554 | 0.0002 | 0.5185 | 0.0067 | 0.0678 | 0.0009 | 428  | 7    | 424  | 4 | 423  | 5  | 100.2 | 423        | 5  |
| 42 |  | 0.53 | 0.0559 | 0.0002 | 0.5516 | 0.0037 | 0.0715 | 0.0004 | 456  | 9    | 446  | 2 | 445  | 3  | 100.2 | 445        | 3  |
| 43 |  | 0.21 | 0.0566 | 0.0002 | 0.4480 | 0.0028 | 0.0573 | 0.0003 | 476  | 5    | 376  | 2 | 359  | 2  | 104.7 | 359        | 2  |
| 44 |  | 0.67 | 0.0553 | 0.0004 | 0.5114 | 0.0055 | 0.0670 | 0.0005 | 433  | 19   | 419  | 4 | 418  | 3  | 100.2 | 418        | 3  |
| 45 |  | 0.44 | 0.0563 | 0.0003 | 0.5594 | 0.0055 | 0.0720 | 0.0007 | 465  | 11   | 451  | 4 | 448  | 4  | 100.7 | 448        | 4  |
| 46 |  | 0.59 | 0.0559 | 0.0001 | 0.5509 | 0.0068 | 0.0714 | 0.0009 | 456  | 6    | 446  | 4 | 445  | 5  | 100.2 | 445        | 5  |



|                                                                                                                        |      |        |        |        |        |        |        |      |      |      |    |      |    |       |            |    |
|------------------------------------------------------------------------------------------------------------------------|------|--------|--------|--------|--------|--------|--------|------|------|------|----|------|----|-------|------------|----|
| 46                                                                                                                     | 0.56 | 0.0548 | 0.0001 | 0.4835 | 0.0046 | 0.0639 | 0.0006 | 406  | (29) | 400  | 3  | 399  | 4  | 100.3 | 399        | 4  |
| 47                                                                                                                     | 0.57 | 0.0560 | 0.0001 | 0.5513 | 0.0051 | 0.0714 | 0.0007 | 454  | 1    | 446  | 3  | 445  | 4  | 100.2 | 445        | 4  |
| 48                                                                                                                     | 0.43 | 0.0562 | 0.0001 | 0.5606 | 0.0068 | 0.0724 | 0.0009 | 457  | 6    | 452  | 4  | 450  | 5  | 100.4 | 450        | 5  |
| 49                                                                                                                     | 0.57 | 0.0602 | 0.0002 | 0.6688 | 0.0057 | 0.0806 | 0.0007 | 609  | 3    | 520  | 3  | 500  | 4  | 104.0 | 500        | 4  |
| 50                                                                                                                     | 0.57 | 0.0559 | 0.0002 | 0.5518 | 0.0054 | 0.0715 | 0.0006 | 450  | 7    | 446  | 4  | 445  | 4  | 100.2 | 445        | 4  |
| 51                                                                                                                     | 0.50 | 0.0564 | 0.0002 | 0.5760 | 0.0035 | 0.0740 | 0.0004 | 478  | 9    | 462  | 2  | 460  | 2  | 100.4 | 460        | 2  |
| 52                                                                                                                     | 0.40 | 0.0574 | 0.0002 | 0.5295 | 0.0044 | 0.0668 | 0.0005 | 509  | 7    | 432  | 3  | 417  | 3  | 103.6 | 417        | 3  |
| 53                                                                                                                     | 0.63 | 0.0561 | 0.0001 | 0.5508 | 0.0066 | 0.0712 | 0.0009 | 454  | 4    | 446  | 4  | 444  | 5  | 100.5 | 444        | 5  |
| 54                                                                                                                     | 0.53 | 0.0557 | 0.0002 | 0.5275 | 0.0034 | 0.0686 | 0.0004 | 443  | 7    | 430  | 2  | 428  | 3  | 100.5 | 428        | 3  |
| 55                                                                                                                     | 0.63 | 0.0556 | 0.0006 | 0.3746 | 0.0066 | 0.0488 | 0.0007 | 435  | 24   | 323  | 5  | 307  | 4  | 105.2 | 307        | 4  |
| 56                                                                                                                     | 0.63 | 0.0560 | 0.0002 | 0.5485 | 0.0045 | 0.0710 | 0.0006 | 450  | 1    | 444  | 3  | 442  | 3  | 100.5 | 442        | 3  |
| 57                                                                                                                     | 0.68 | 0.0554 | 0.0001 | 0.5169 | 0.0049 | 0.0676 | 0.0006 | 428  | (1)  | 423  | 3  | 422  | 4  | 100.2 | 422        | 4  |
| 58                                                                                                                     | 1.15 | 0.0556 | 0.0001 | 0.5195 | 0.0068 | 0.0677 | 0.0009 | 439  | 4    | 425  | 5  | 422  | 5  | 100.7 | 422        | 5  |
| 59                                                                                                                     | 0.77 | 0.0535 | 0.0001 | 0.3845 | 0.0020 | 0.0521 | 0.0003 | 350  | 10   | 330  | 1  | 327  | 2  | 100.9 | 327        | 2  |
| 60                                                                                                                     | 0.53 | 0.0566 | 0.0002 | 0.5907 | 0.0043 | 0.0756 | 0.0006 | 476  | 6    | 471  | 3  | 470  | 3  | 100.2 | 470        | 3  |
| 61                                                                                                                     | 0.71 | 0.0533 | 0.0003 | 0.3813 | 0.0032 | 0.0519 | 0.0004 | 343  | 11   | 328  | 2  | 326  | 2  | 100.6 | 326        | 2  |
| Sample 12TS38-2, paragneiss, Carboniferous matrix of the Wuwamen ophiolitic melange, (Wang et al., 2017, GSA Bulletin) |      |        |        |        |        |        |        |      |      |      |    |      |    |       |            |    |
| 1                                                                                                                      | 0.42 | 0.0571 | 0.0002 | 0.6077 | 0.0044 | 0.0772 | 0.0005 | 494  | 7    | 482  | 3  | 479  | 3  | 100.6 | 479        | 3  |
| 2                                                                                                                      | 0.67 | 0.0565 | 0.0003 | 0.5279 | 0.0046 | 0.0678 | 0.0004 | 472  | 13   | 430  | 3  | 423  | 2  | 101.7 | 423        | 2  |
| 3                                                                                                                      | 0.74 | 0.0802 | 0.0005 | 0.5901 | 0.0034 | 0.0533 | 0.0003 | 1203 | 13   | 471  | 2  | 335  | 2  | 140.6 | Discordant |    |
| 4                                                                                                                      | 0.95 | 0.0567 | 0.0002 | 0.5882 | 0.0033 | 0.0752 | 0.0004 | 480  | 7    | 470  | 2  | 467  | 2  | 100.6 | 467        | 2  |
| 5                                                                                                                      | 0.49 | 0.0623 | 0.0001 | 0.5914 | 0.0045 | 0.0687 | 0.0005 | 687  | 9    | 472  | 3  | 429  | 3  | 110.0 | Discordant |    |
| 6                                                                                                                      | 0.55 | 0.0613 | 0.0003 | 0.6277 | 0.0033 | 0.0743 | 0.0004 | 650  | 9    | 495  | 2  | 462  | 3  | 107.1 | 462        | 3  |
| 7                                                                                                                      | 0.52 | 0.0557 | 0.0002 | 0.5267 | 0.0037 | 0.0685 | 0.0004 | 443  | 9    | 430  | 2  | 427  | 2  | 100.7 | 427        | 2  |
| 8                                                                                                                      | 0.97 | 0.0729 | 0.0002 | 1.410  | 0.0143 | 0.1401 | 0.0013 | 1011 | 6    | 893  | 6  | 845  | 7  | 105.7 | 845        | 7  |
| 9                                                                                                                      | 0.79 | 0.0561 | 0.0002 | 0.5532 | 0.0033 | 0.0715 | 0.0004 | 457  | 7    | 447  | 2  | 445  | 2  | 100.4 | 445        | 2  |
| 10                                                                                                                     | 0.80 | 0.0565 | 0.0001 | 0.5277 | 0.0030 | 0.0677 | 0.0003 | 472  | 1    | 430  | 2  | 422  | 2  | 101.9 | 422        | 2  |
| 11                                                                                                                     | 0.62 | 0.0558 | 0.0001 | 0.5261 | 0.0059 | 0.0684 | 0.0008 | 456  | 6    | 429  | 4  | 426  | 5  | 100.7 | 426        | 5  |
| 12                                                                                                                     | 0.56 | 0.0560 | 0.0002 | 0.5517 | 0.0041 | 0.0714 | 0.0005 | 454  | 3    | 446  | 3  | 445  | 3  | 100.2 | 445        | 3  |
| 13                                                                                                                     | 0.82 | 0.0567 | 0.0002 | 0.5865 | 0.0054 | 0.0750 | 0.0007 | 480  | 7    | 469  | 3  | 466  | 4  | 100.6 | 466        | 4  |
| 14                                                                                                                     | 0.50 | 0.0557 | 0.0001 | 0.5235 | 0.0039 | 0.0682 | 0.0005 | 439  | 4    | 428  | 3  | 425  | 3  | 100.7 | 425        | 3  |
| 15                                                                                                                     | 1.23 | 0.0569 | 0.0003 | 0.6083 | 0.0068 | 0.0774 | 0.0007 | 500  | 11   | 483  | 4  | 481  | 4  | 100.4 | 481        | 4  |
| 16                                                                                                                     | 0.62 | 0.0578 | 0.0001 | 0.5528 | 0.0059 | 0.0693 | 0.0007 | 524  | 6    | 447  | 4  | 432  | 4  | 103.5 | 432        | 4  |
| 17                                                                                                                     | 0.49 | 0.0566 | 0.0002 | 0.5876 | 0.0047 | 0.0752 | 0.0006 | 480  | 6    | 469  | 3  | 468  | 4  | 100.2 | 468        | 4  |
| 18                                                                                                                     | 0.61 | 0.0562 | 0.0001 | 0.5524 | 0.0057 | 0.0714 | 0.0008 | 461  | 6    | 447  | 4  | 444  | 5  | 100.7 | 444        | 5  |
| 19                                                                                                                     | 0.83 | 0.0566 | 0.0002 | 0.5823 | 0.0033 | 0.0747 | 0.0004 | 476  | 3    | 466  | 2  | 464  | 3  | 100.4 | 464        | 3  |
| 20                                                                                                                     | 1.43 | 0.0580 | 0.0004 | 0.4554 | 0.0069 | 0.0569 | 0.0007 | 532  | 15   | 381  | 5  | 357  | 4  | 106.7 | 357        | 4  |
| 21                                                                                                                     | 0.76 | 0.0561 | 0.0002 | 0.5492 | 0.0036 | 0.0710 | 0.0004 | 457  | 6    | 445  | 2  | 442  | 2  | 100.7 | 442        | 2  |
| 22                                                                                                                     | 0.33 | 0.0551 | 0.0002 | 0.4068 | 0.0026 | 0.0535 | 0.0003 | 417  | 12   | 347  | 2  | 336  | 2  | 103.3 | 336        | 2  |
| 23                                                                                                                     | 0.61 | 0.0562 | 0.0002 | 0.5500 | 0.0059 | 0.0710 | 0.0007 | 457  | 7    | 445  | 4  | 442  | 4  | 100.7 | 442        | 4  |
| 24                                                                                                                     | 0.73 | 0.0573 | 0.0002 | 0.5906 | 0.0038 | 0.0748 | 0.0005 | 502  | 7    | 471  | 2  | 465  | 3  | 101.3 | 465        | 3  |
| 25                                                                                                                     | 0.66 | 0.0556 | 0.0002 | 0.5241 | 0.0059 | 0.0684 | 0.0007 | 439  | 6    | 428  | 4  | 426  | 5  | 100.5 | 426        | 5  |
| 26                                                                                                                     | 0.60 | 0.0573 | 0.0004 | 0.6301 | 0.0077 | 0.0798 | 0.0008 | 502  | 17   | 496  | 5  | 495  | 5  | 100.2 | 495        | 5  |
| 27                                                                                                                     | 0.53 | 0.0557 | 0.0002 | 0.5186 | 0.0047 | 0.0675 | 0.0006 | 439  | 12   | 424  | 3  | 421  | 3  | 100.7 | 421        | 3  |
| 28                                                                                                                     | 0.38 | 0.0637 | 0.0003 | 0.6511 | 0.0048 | 0.0741 | 0.0005 | 733  | 9    | 509  | 3  | 461  | 3  | 110.4 | Discordant |    |
| 29                                                                                                                     | 0.42 | 0.0572 | 0.0004 | 0.6102 | 0.0094 | 0.0774 | 0.0011 | 502  | 18   | 484  | 6  | 480  | 7  | 100.8 | 480        | 7  |
| 30                                                                                                                     | 0.60 | 0.0560 | 0.0002 | 0.4674 | 0.0050 | 0.0606 | 0.0006 | 450  | 9    | 389  | 3  | 379  | 4  | 102.6 | 379        | 4  |
| 31                                                                                                                     | 0.44 | 0.0554 | 0.0002 | 0.4251 | 0.0030 | 0.0557 | 0.0003 | 428  | 7    | 360  | 2  | 349  | 2  | 103.2 | 349        | 2  |
| 32                                                                                                                     | 0.57 | 0.0569 | 0.0002 | 0.5133 | 0.0033 | 0.0654 | 0.0003 | 487  | 7    | 421  | 2  | 409  | 2  | 102.9 | 409        | 2  |
| 33                                                                                                                     | 0.68 | 0.0539 | 0.0002 | 0.4178 | 0.0043 | 0.0562 | 0.0006 | 369  | 7    | 355  | 3  | 352  | 3  | 100.9 | 352        | 3  |
| 34                                                                                                                     | 0.64 | 0.0565 | 0.0002 | 0.5842 | 0.0063 | 0.0750 | 0.0008 | 472  | 1    | 467  | 4  | 466  | 5  | 100.2 | 466        | 5  |
| 35                                                                                                                     | 0.72 | 0.0567 | 0.0003 | 0.5537 | 0.0044 | 0.0708 | 0.0005 | 480  | 11   | 447  | 3  | 441  | 3  | 101.4 | 441        | 3  |
| 36                                                                                                                     | 0.69 | 0.0558 | 0.0002 | 0.5299 | 0.0068 | 0.0689 | 0.0009 | 443  | 6    | 432  | 4  | 430  | 5  | 100.5 | 430        | 5  |
| 37                                                                                                                     | 0.70 | 0.0573 | 0.0002 | 0.5894 | 0.0048 | 0.0748 | 0.0007 | 502  | 5    | 470  | 3  | 465  | 4  | 101.1 | 465        | 4  |
| 38                                                                                                                     | 0.60 | 0.0567 | 0.0002 | 0.5868 | 0.0072 | 0.0749 | 0.0008 | 483  | 6    | 469  | 5  | 465  | 5  | 100.9 | 465        | 5  |
| 39                                                                                                                     | 0.65 | 0.0555 | 0.0001 | 0.5216 | 0.0038 | 0.0681 | 0.0005 | 435  | 6    | 426  | 3  | 425  | 3  | 100.2 | 425        | 3  |
| 40                                                                                                                     | 0.82 | 0.0563 | 0.0002 | 0.5573 | 0.0033 | 0.0717 | 0.0004 | 465  | 7    | 450  | 2  | 447  | 2  | 100.7 | 447        | 2  |
| Sample 071-1, micaschist, Atantayi River, Akeyazi HP-LT belt, (Liu et al., 2014, Lithos)                               |      |        |        |        |        |        |        |      |      |      |    |      |    |       |            |    |
| 071-1@1                                                                                                                | 428  | 899    | 0.48   | 1.783  | 0.0280 | 0.1726 | 0.0026 | 1066 | 10   | 1039 | 10 | 1027 | 14 | 103.8 | 1066       | 10 |
| 071-1@2                                                                                                                | 233  | 335    | 0.70   | 0.5558 | 0.0119 | 0.0717 | 0.0011 | 462  | 33   | 449  | 8  | 446  | 7  | 100.6 | 446        | 7  |
| 071-1@3                                                                                                                | 216  | 293    | 0.74   | 0.5429 | 0.0115 | 0.0710 | 0.0011 | 432  | 32   | 440  | 8  | 442  | 7  | 99.6  | 442        | 7  |
| 071-1@4                                                                                                                | 119  | 837    | 0.14   | 2.014  | 0.0316 | 0.1865 | 0.0028 | 1155 | 9    | 1120 | 11 | 1103 | 15 | 104.7 | 1155       | 9  |
| 071-1@5                                                                                                                | 45   | 229    | 0.20   | 2.893  | 0.0495 | 0.2365 | 0.0036 | 1398 | 14   | 1380 | 13 | 1368 | 19 | 102.2 | 1398       | 14 |
| 071-1@6                                                                                                                | 10   | 1441   | 0.01   | 2.589  | 0.0469 | 0.2011 | 0.0034 | 1495 | 12   | 1297 | 13 | 1181 | 18 | 126.6 | Discordant |    |
| 071-1@7                                                                                                                | 152  | 780    | 0.20   | 2.244  | 0.0361 | 0.1788 | 0.0027 | 1447 | 11   | 1195 | 11 | 1061 | 15 | 136.4 | Discordant |    |
| 071-1@10                                                                                                               | 332  | 648    | 0.51   | 0.5620 | 0.0105 | 0.0718 | 0.0011 | 482  | 25   | 453  | 7  | 447  | 7  | 101.3 | 447        | 7  |
| 071-1@11                                                                                                               | 253  | 214    | 1.18   | 1.524  | 0.0338 | 0.1577 | 0.0024 | 932  | 33   | 940  | 14 | 944  | 13 | 99.6  | 944        | 13 |
| 071-1@12                                                                                                               | 268  | 657    | 0.41   | 0.5474 | 0.0100 | 0.0709 | 0.0011 | 454  | 222  |      |    |      |    |       |            |    |

|                                                                                                                   |      |        |        |        |        |        |        |        |      |      |      |      |      |       |            |            |    |
|-------------------------------------------------------------------------------------------------------------------|------|--------|--------|--------|--------|--------|--------|--------|------|------|------|------|------|-------|------------|------------|----|
| 071-15@29                                                                                                         | 204  | 425    | 0.48   |        | 2.879  | 0.0452 | 0.2373 | 0.0036 | 1382 | 9    | 1377 | 12   | 1373 | 19    | 100.7      | 1382       | 9  |
| 071-15@31                                                                                                         | 205  | 1754   | 0.12   |        | 9.162  | 0.1393 | 0.4172 | 0.0063 | 2448 | 4    | 2354 | 14   | 2248 | 29    | 108.9      | 2448       | 4  |
| 071-15@32                                                                                                         | 137  | 1245   | 0.11   |        | 7.561  | 0.1225 | 0.3785 | 0.0057 | 2286 | 10   | 2180 | 15   | 2070 | 27    | 110.5      | Discordant |    |
| 071-15@33                                                                                                         | 165  | 1329   | 0.12   |        | 8.636  | 0.1641 | 0.4029 | 0.0060 | 2407 | 20   | 2300 | 18   | 2182 | 28    | 110.3      | Discordant |    |
| 071-15@34                                                                                                         | 337  | 764    | 0.44   |        | 0.5498 | 0.0098 | 0.0710 | 0.0011 | 458  | 20   | 445  | 7    | 442  | 7     | 100.6      | 442        | 7  |
| Sample 071-16, micaschist, Atantayi River, Akeyazi HP-LT belt, (Liu et al., 2014, Lithos)                         |      |        |        |        |        |        |        |        |      |      |      |      |      |       |            |            |    |
| 071-16@2                                                                                                          | 116  | 526    | 0.22   |        | 0.5223 | 0.0091 | 0.0706 | 0.0011 | 358  | 20   | 427  | 6    | 440  | 6     | 97.1       | 440        | 6  |
| 071-16@3                                                                                                          | 103  | 417    | 0.25   |        | 0.5340 | 0.0089 | 0.0712 | 0.0011 | 387  | 16   | 434  | 6    | 444  | 6     | 97.9       | 444        | 6  |
| 071-16@6                                                                                                          | 452  | 271    | 1.67   |        | 0.7250 | 0.0134 | 0.0932 | 0.0014 | 468  | 24   | 554  | 8    | 575  | 8     | 96.3       | 575        | 8  |
| 071-16@7                                                                                                          | 284  | 162    | 1.75   |        | 0.7231 | 0.0136 | 0.0910 | 0.0014 | 515  | 25   | 553  | 8    | 562  | 8     | 98.4       | 562        | 8  |
| 071-16@8                                                                                                          | 253  | 104    | 2.43   |        | 11.146 | 0.1772 | 0.4807 | 0.0072 | 2540 | 9    | 2535 | 15   | 2530 | 32    | 100.4      | 2540       | 9  |
| 071-16@9                                                                                                          | 90   | 167    | 0.54   |        | 0.5205 | 0.0104 | 0.0679 | 0.0010 | 438  | 28   | 426  | 7    | 423  | 6     | 100.5      | 423        | 6  |
| 071-16@10                                                                                                         | 106  | 176    | 0.60   |        | 4.858  | 0.0753 | 0.3003 | 0.0045 | 1916 | 7    | 1795 | 13   | 1693 | 22    | 113.2      | Discordant |    |
| 071-16@11                                                                                                         | 46   | 171    | 0.27   |        | 4.561  | 0.0748 | 0.2827 | 0.0045 | 1911 | 7    | 1742 | 14   | 1605 | 23    | 119.1      | Discordant |    |
| 071-16@12                                                                                                         | 114  | 118    | 0.96   |        | 2.043  | 0.0337 | 0.1911 | 0.0029 | 1135 | 14   | 1130 | 11   | 1127 | 16    | 100.7      | 1135       | 14 |
| 071-16@13                                                                                                         | 308  | 342    | 0.90   |        | 0.5617 | 0.0107 | 0.0739 | 0.0011 | 417  | 26   | 453  | 7    | 460  | 7     | 98.4       | 460        | 7  |
| 071-16@16                                                                                                         | 239  | 292    | 0.82   |        | 10.460 | 0.1579 | 0.4673 | 0.0070 | 2480 | 3    | 2476 | 14   | 2472 | 31    | 100.3      | 2480       | 3  |
| 071-16@17                                                                                                         | 328  | 666    | 0.49   |        | 0.5141 | 0.0092 | 0.0679 | 0.0010 | 408  | 21   | 421  | 6    | 424  | 6     | 99.4       | 424        | 6  |
| 071-16@18                                                                                                         | 422  | 775    | 0.54   |        | 0.5399 | 0.0092 | 0.0717 | 0.0011 | 395  | 17   | 438  | 6    | 447  | 7     | 98.1       | 447        | 7  |
| 071-16@19                                                                                                         | 118  | 575    | 0.20   |        | 4.425  | 0.0686 | 0.2820 | 0.0043 | 1861 | 6    | 1717 | 13   | 1601 | 22    | 116.2      | Discordant |    |
| 071-16@20                                                                                                         | 406  | 1026   | 0.40   |        | 2.697  | 0.0410 | 0.2081 | 0.0031 | 1508 | 5    | 1328 | 11   | 1219 | 17    | 123.7      | Discordant |    |
| 071-16@21                                                                                                         | 303  | 428    | 0.71   |        | 3.813  | 0.0587 | 0.2837 | 0.0043 | 1576 | 6    | 1595 | 12   | 1610 | 21    | 97.9       | 1576       | 6  |
| 071-16@22                                                                                                         | 986  | 1527   | 0.65   |        | 0.5470 | 0.0085 | 0.0720 | 0.0011 | 415  | 9    | 443  | 6    | 449  | 7     | 98.8       | 449        | 7  |
| 071-16@23                                                                                                         | 465  | 968    | 0.48   |        | 0.5471 | 0.0086 | 0.0720 | 0.0011 | 418  | 10   | 443  | 6    | 448  | 7     | 98.9       | 448        | 7  |
| 071-16@24                                                                                                         | 92   | 204    | 0.45   |        | 0.5155 | 0.0205 | 0.0679 | 0.0010 | 414  | 80   | 422  | 14   | 424  | 6     | 99.6       | 424        | 6  |
| 071-16@25                                                                                                         | 214  | 381    | 0.56   |        | 0.5350 | 0.0091 | 0.0708 | 0.0011 | 406  | 18   | 435  | 6    | 441  | 6     | 98.7       | 441        | 6  |
| 071-16@26                                                                                                         | 78   | 92     | 0.84   |        | 22.035 | 0.3636 | 0.6327 | 0.0096 | 3201 | 10   | 3185 | 16   | 3160 | 38    | 101.3      | 3201       | 10 |
| 071-16@27                                                                                                         | 124  | 185    | 0.67   |        | 0.5212 | 0.0123 | 0.0701 | 0.0011 | 366  | 41   | 426  | 8    | 437  | 6     | 97.4       | 437        | 6  |
| 071-16@28                                                                                                         | 206  | 325    | 0.64   |        | 0.5495 | 0.0097 | 0.0722 | 0.0011 | 422  | 21   | 445  | 6    | 449  | 7     | 99.0       | 449        | 7  |
| 071-16@30                                                                                                         | 24   | 50     | 0.48   |        | 0.5371 | 0.0157 | 0.0699 | 0.0011 | 443  | 55   | 437  | 11   | 435  | 6     | 100.3      | 435        | 6  |
| 071-16@32                                                                                                         | 240  | 314    | 0.76   |        | 0.5125 | 0.0095 | 0.0701 | 0.0011 | 330  | 25   | 420  | 6    | 437  | 6     | 96.2       | 437        | 6  |
| 071-16@33                                                                                                         | 79   | 118    | 0.67   |        | 10.089 | 0.1584 | 0.4469 | 0.0067 | 2495 | 7    | 2443 | 15   | 2382 | 30    | 104.7      | 2495       | 7  |
| 071-16@34                                                                                                         | 77   | 97     | 0.79   |        | 0.5484 | 0.0247 | 0.0719 | 0.0011 | 424  | 92   | 444  | 16   | 448  | 7     | 99.2       | 448        | 7  |
| 071-16@35                                                                                                         | 128  | 397    | 0.32   |        | 0.4778 | 0.0240 | 0.0652 | 0.0010 | 336  | 105  | 397  | 17   | 407  | 6     | 97.4       | 407        | 6  |
| 071-16@36                                                                                                         | 49   | 68     | 0.73   |        | 0.5066 | 0.0170 | 0.0677 | 0.0010 | 381  | 66   | 416  | 12   | 423  | 6     | 98.5       | 423        | 6  |
| 071-16@38                                                                                                         | 116  | 254    | 0.46   |        | 0.4927 | 0.0099 | 0.0654 | 0.0010 | 399  | 30   | 407  | 7    | 408  | 6     | 99.6       | 408        | 6  |
| Sample 10LX5-13, micaschist, Atantayi River, Akeyazi HP-LT belt, (Liu et al., 2014, Lithos)                       |      |        |        |        |        |        |        |        |      |      |      |      |      |       |            |            |    |
| 10LX5-13@1                                                                                                        | 218  | 1005   | 0.22   |        | 4.217  | 0.0649 | 0.2859 | 0.0043 | 1749 | 6    | 1677 | 13   | 1621 | 22    | 107.9      | 1749       | 6  |
| 10LX5-13@2                                                                                                        | 9    | 1216   | 0.01   |        | 3.684  | 0.0567 | 0.2676 | 0.0040 | 1621 | 6    | 1568 | 12   | 1529 | 21    | 106.0      | 1621       | 6  |
| 10LX5-13@3                                                                                                        | 100  | 839    | 0.12   |        | 1.848  | 0.0303 | 0.1771 | 0.0027 | 1087 | 11   | 1063 | 11   | 1051 | 15    | 103.5      | 1087       | 11 |
| 10LX5-13@5                                                                                                        | 227  | 334    | 0.68   |        | 1.385  | 0.0306 | 0.1440 | 0.0022 | 922  | 33   | 883  | 13   | 867  | 12    | 101.8      | 867        | 12 |
| 10LX5-13@6                                                                                                        | 646  | 1018   | 0.63   |        | 1.539  | 0.0248 | 0.1589 | 0.0024 | 935  | 11   | 946  | 10   | 951  | 13    | 99.5       | 951        | 13 |
| 10LX5-13@7                                                                                                        | 70   | 345    | 0.20   |        | 9.655  | 0.1564 | 0.4345 | 0.0068 | 2468 | 7    | 2403 | 15   | 2326 | 31    | 106.1      | 2468       | 7  |
| 10LX5-13@8                                                                                                        | 1003 | 1454   | 0.69   |        | 0.9375 | 0.0153 | 0.1107 | 0.0017 | 655  | 13   | 672  | 8    | 677  | 10    | 99.3       | 677        | 10 |
| 10LX5-13@9                                                                                                        | 522  | 823    | 0.64   |        | 0.5242 | 0.0132 | 0.0686 | 0.0010 | 431  | 44   | 428  | 9    | 428  | 6     | 100.1      | 428        | 6  |
| 10LX5-13@10                                                                                                       | 612  | 1313   | 0.47   |        | 9.905  | 0.1515 | 0.4352 | 0.0066 | 2508 | 4    | 2426 | 14   | 2329 | 30    | 107.7      | 2508       | 4  |
| 10LX5-13@12                                                                                                       | 19   | 84     | 0.23   |        | 1.671  | 0.0471 | 0.1749 | 0.0026 | 908  | 48   | 997  | 18   | 1039 | 15    | 87.4       | Discordant |    |
| 10LX5-13@13                                                                                                       | 159  | 528    | 0.30   |        | 2.386  | 0.0408 | 0.1993 | 0.0031 | 1357 | 13   | 1239 | 12   | 1172 | 17    | 115.8      | Discordant |    |
| 10LX5-13@14                                                                                                       | 108  | 162    | 0.67   |        | 5.394  | 0.0933 | 0.3397 | 0.0051 | 1882 | 15   | 1884 | 15   | 1886 | 25    | 99.8       | 1882       | 15 |
| 10LX5-13@15                                                                                                       | 422  | 785    | 0.54   |        | 0.5279 | 0.0114 | 0.0689 | 0.0011 | 434  | 34   | 430  | 8    | 430  | 6     | 100.2      | 430        | 6  |
| 10LX5-13@17                                                                                                       | 161  | 282    | 0.57   |        | 0.5242 | 0.0130 | 0.0680 | 0.0010 | 450  | 43   | 428  | 9    | 424  | 6     | 100.9      | 424        | 6  |
| 10LX5-13@18                                                                                                       | 381  | 442    | 0.86   |        | 0.5321 | 0.0123 | 0.0688 | 0.0010 | 457  | 39   | 433  | 8    | 429  | 6     | 101.0      | 429        | 6  |
| Sample TK050, garnet-bearing micaschist, Kekesu valley, Akeyazi HP-LT belt, (Xia et al., 2014, Gondwana Research) |      |        |        |        |        |        |        |        |      |      |      |      |      |       |            |            |    |
| 1                                                                                                                 | 0.48 | 0.0789 | 0.0016 | 1.880  | 0.0346 | 0.1728 | 0.0014 | 1169   | 40   | 1074 | 12   | 1028 | 7    | 113.7 | Discordant |            |    |
| 2                                                                                                                 | 0.56 | 0.1024 | 0.0009 | 3.808  | 0.0268 | 0.2697 | 0.0019 | 1668   | 6    | 1594 | 6    | 1539 | 10   | 108.4 | 1668       | 6          |    |
| 3                                                                                                                 | 0.31 | 0.0545 | 0.0015 | 0.4549 | 0.0123 | 0.0605 | 0.0005 | 392    | 65   | 381  | 9    | 379  | 3    | 100.5 | 379        | 3          |    |
| 4                                                                                                                 | 0.41 | 0.0562 | 0.0010 | 0.5207 | 0.0089 | 0.0672 | 0.0005 | 460    | 24   | 426  | 6    | 419  | 3    | 101.7 | 419        | 3          |    |
| 5                                                                                                                 | 0.65 | 0.1032 | 0.0017 | 1.631  | 0.0240 | 0.1146 | 0.0009 | 1683   | 31   | 982  | 9    | 699  | 5    | 140.5 | Discordant |            |    |
| 6                                                                                                                 | 0.14 | 0.0658 | 0.0009 | 0.5387 | 0.0065 | 0.0594 | 0.0005 | 801    | 13   | 438  | 4    | 372  | 3    | 117.7 | Discordant |            |    |
| 7                                                                                                                 | 0.31 | 0.0705 | 0.0008 | 1.360  | 0.0132 | 0.1401 | 0.0011 | 942    | 9    | 872  | 6    | 845  | 6    | 103.2 | 845        | 6          |    |
| 8                                                                                                                 | 0.50 | 0.0571 | 0.0009 | 0.5326 | 0.0080 | 0.0677 | 0.0006 | 494    | 19   | 434  | 5    | 422  | 3    | 102.8 | 422        | 3          |    |
| 9                                                                                                                 | 0.68 | 0.0878 | 0.0018 | 0.6378 | 0.0119 | 0.0527 | 0.0005 | 1378   | 22   | 501  | 7    | 331  | 3    | 151.4 | Discordant |            |    |
| 10                                                                                                                | 0.50 | 0.0718 | 0.0018 | 1.569  | 0.0362 | 0.1585 | 0.0013 | 981    | 51   | 958  | 14   | 949  | 7    | 100.9 | 949        | 7          |    |
| 11                                                                                                                | 0.43 | 0.0746 | 0.0006 | 1.565  | 0.0100 | 0.1522 | 0.0011 | 1058   | 6    | 957  | 4    | 913  | 6    | 104.8 | 913        | 6          |    |
| 12                                                                                                                | 0.94 | 0.0780 | 0.0007 | 1.614  | 0.0119 | 0.1501 | 0.0011 | 1147   | 7    | 976  | 5    | 901  | 6    | 108.3 | 901        | 6          |    |
| 13                                                                                                                | 0.19 | 0.0591 | 0.0016 | 0.5690 | 0.0147 | 0.0698 | 0.0006 | 571    | 60   | 457  | 9    | 435  | 3    | 105.1 | 435        | 3          |    |
| 14                                                                                                                | 0.20 | 0.0771 | 0.0007 | 1.574  | 0.0124 | 0.1480 | 0.0011 | 1125   | 7    | 96   |      |      |      |       |            |            |    |

|     |      |        |        |        |        |        |        |      |     |      |    |      |    |       |            |    |
|-----|------|--------|--------|--------|--------|--------|--------|------|-----|------|----|------|----|-------|------------|----|
| 64  | 0.31 | 0.1583 | 0.0014 | 6.802  | 0.0501 | 0.3118 | 0.0023 | 2437 | 6   | 2086 | 7  | 1749 | 11 | 139.3 | Discordant |    |
| 65  | 0.24 | 0.0580 | 0.0007 | 0.5506 | 0.0056 | 0.0689 | 0.0005 | 530  | 11  | 445  | 4  | 429  | 3  | 103.7 | 429        | 3  |
| 66  | 0.83 | 0.0613 | 0.0031 | 0.6449 | 0.0322 | 0.0764 | 0.0009 | 648  | 113 | 505  | 20 | 474  | 5  | 106.5 | 474        | 5  |
| 67  | 0.96 | 0.0683 | 0.0010 | 0.5580 | 0.0073 | 0.0593 | 0.0005 | 877  | 14  | 450  | 5  | 371  | 3  | 121.3 | Discordant |    |
| 68  | 0.58 | 0.0731 | 0.0018 | 0.9344 | 0.0221 | 0.0927 | 0.0009 | 1018 | 32  | 670  | 12 | 571  | 5  | 117.3 | Discordant |    |
| 69  | 0.62 | 0.0658 | 0.0015 | 0.6211 | 0.0138 | 0.0685 | 0.0006 | 798  | 32  | 491  | 9  | 427  | 4  | 115.0 | Discordant |    |
| 70  | 0.23 | 0.0578 | 0.0007 | 0.5289 | 0.0061 | 0.0664 | 0.0005 | 522  | 13  | 431  | 4  | 414  | 3  | 104.1 | 414        | 3  |
| 71  | 0.38 | 0.1151 | 0.0022 | 3.863  | 0.0655 | 0.2435 | 0.0020 | 1881 | 35  | 1606 | 14 | 1405 | 10 | 133.9 | Discordant |    |
| 72  | 0.71 | 0.0692 | 0.0015 | 1.090  | 0.0215 | 0.1142 | 0.0009 | 904  | 45  | 748  | 10 | 697  | 5  | 107.3 | 697        | 5  |
| 73  | 0.59 | 0.0759 | 0.0014 | 1.599  | 0.0285 | 0.1528 | 0.0013 | 1093 | 22  | 970  | 11 | 916  | 7  | 105.9 | 916        | 7  |
| 74  | 0.72 | 0.0806 | 0.0012 | 2.169  | 0.0275 | 0.1952 | 0.0014 | 1211 | 29  | 1171 | 9  | 1150 | 8  | 105.3 | 1211       | 29 |
| 75  | 0.35 | 0.0712 | 0.0016 | 1.420  | 0.0296 | 0.1447 | 0.0012 | 962  | 47  | 897  | 12 | 871  | 7  | 103.0 | 871        | 7  |
| 76  | 0.54 | 0.1627 | 0.0016 | 9.638  | 0.0830 | 0.4298 | 0.0033 | 2484 | 6   | 2401 | 8  | 2305 | 15 | 107.8 | 2484       | 6  |
| 77  | 0.16 | 0.0726 | 0.0010 | 1.129  | 0.0147 | 0.1128 | 0.0009 | 1003 | 14  | 767  | 7  | 689  | 5  | 111.3 | Discordant |    |
| 78  | 0.49 | 0.1762 | 0.0035 | 10.371 | 0.1766 | 0.4270 | 0.0044 | 2617 | 34  | 2468 | 16 | 2292 | 20 | 114.2 | Discordant |    |
| 79  | 1.22 | 0.0855 | 0.0009 | 2.536  | 0.0223 | 0.2152 | 0.0016 | 1327 | 8   | 1282 | 6  | 1256 | 8  | 105.7 | 1327       | 8  |
| 80  | 0.22 | 0.0609 | 0.0010 | 0.5732 | 0.0088 | 0.0683 | 0.0006 | 636  | 19  | 460  | 6  | 426  | 3  | 108.0 | 426        | 3  |
| 81  | 1.28 | 0.1309 | 0.0013 | 5.510  | 0.0465 | 0.3054 | 0.0023 | 2110 | 7   | 1902 | 7  | 1718 | 11 | 122.8 | Discordant |    |
| 82  | 0.19 | 0.0695 | 0.0013 | 1.117  | 0.0203 | 0.1165 | 0.0011 | 915  | 22  | 761  | 10 | 710  | 6  | 107.2 | 710        | 6  |
| 83  | 0.65 | 0.0754 | 0.0030 | 1.198  | 0.0458 | 0.1153 | 0.0014 | 1079 | 56  | 800  | 21 | 703  | 8  | 113.8 | Discordant |    |
| 84  | 0.37 | 0.0582 | 0.0010 | 0.5257 | 0.0082 | 0.0656 | 0.0005 | 537  | 20  | 429  | 5  | 409  | 3  | 104.9 | 409        | 3  |
| 85  | 0.82 | 0.0842 | 0.0008 | 2.595  | 0.0225 | 0.2237 | 0.0016 | 1296 | 8   | 1299 | 6  | 1302 | 9  | 99.5  | 1296       | 8  |
| 86  | 0.17 | 0.0570 | 0.0017 | 0.6050 | 0.0177 | 0.0771 | 0.0007 | 490  | 49  | 480  | 11 | 479  | 4  | 100.2 | 479        | 4  |
| 87  | 0.54 | 0.1046 | 0.0014 | 4.035  | 0.0428 | 0.2798 | 0.0021 | 1707 | 24  | 1641 | 9  | 1590 | 11 | 107.4 | 1707       | 24 |
| 88  | 0.12 | 0.0630 | 0.0024 | 0.7236 | 0.0272 | 0.0834 | 0.0008 | 707  | 84  | 553  | 16 | 516  | 5  | 107.2 | 516        | 5  |
| 89  | 0.57 | 0.0669 | 0.0010 | 1.296  | 0.0175 | 0.1405 | 0.0011 | 835  | 33  | 844  | 8  | 847  | 6  | 99.6  | 847        | 6  |
| 90  | 1.51 | 0.0572 | 0.0007 | 0.6204 | 0.0067 | 0.0787 | 0.0006 | 499  | 12  | 490  | 4  | 488  | 4  | 100.4 | 488        | 4  |
| 91  | 1.09 | 0.0731 | 0.0010 | 1.583  | 0.0199 | 0.1572 | 0.0012 | 1016 | 13  | 964  | 8  | 941  | 7  | 102.4 | 941        | 7  |
| 92  | 0.12 | 0.0594 | 0.0009 | 0.7134 | 0.0102 | 0.0872 | 0.0007 | 580  | 18  | 547  | 6  | 539  | 4  | 101.5 | 539        | 4  |
| 93  | 0.47 | 0.1391 | 0.0017 | 3.846  | 0.0359 | 0.2005 | 0.0015 | 2216 | 21  | 1602 | 8  | 1178 | 8  | 188.1 | Discordant |    |
| 94  | 0.73 | 0.0573 | 0.0024 | 0.5530 | 0.0221 | 0.0700 | 0.0007 | 504  | 92  | 447  | 14 | 436  | 4  | 102.5 | 436        | 4  |
| 95  | 1.22 | 0.0585 | 0.0010 | 0.5622 | 0.0095 | 0.0697 | 0.0006 | 548  | 23  | 453  | 6  | 434  | 3  | 104.4 | 434        | 3  |
| 96  | 0.40 | 0.1014 | 0.0011 | 3.106  | 0.0288 | 0.2221 | 0.0017 | 1651 | 8   | 1434 | 7  | 1293 | 9  | 127.7 | Discordant |    |
| 97  | 0.70 | 0.0690 | 0.0010 | 1.271  | 0.0175 | 0.1336 | 0.0011 | 899  | 16  | 833  | 8  | 808  | 6  | 103.1 | 808        | 6  |
| 98  | 0.11 | 0.0778 | 0.0008 | 1.978  | 0.0188 | 0.1843 | 0.0014 | 1143 | 9   | 1108 | 6  | 1091 | 7  | 104.8 | 1143       | 9  |
| 99  | 1.00 | 0.0677 | 0.0008 | 1.105  | 0.0120 | 0.1184 | 0.0009 | 858  | 11  | 756  | 6  | 722  | 5  | 104.7 | 722        | 5  |
| 100 | 0.15 | 0.0735 | 0.0008 | 1.751  | 0.0174 | 0.1728 | 0.0013 | 1029 | 9   | 1028 | 6  | 1028 | 7  | 100.1 | 1029       | 9  |
| 101 | 0.77 | 0.0587 | 0.0010 | 0.5596 | 0.0087 | 0.0692 | 0.0006 | 554  | 20  | 451  | 6  | 432  | 3  | 104.4 | 432        | 3  |
| 102 | 0.76 | 0.0586 | 0.0008 | 0.5770 | 0.0077 | 0.0715 | 0.0006 | 550  | 16  | 462  | 5  | 445  | 3  | 103.8 | 445        | 3  |
| 103 | 0.11 | 0.0638 | 0.0008 | 1.010  | 0.0123 | 0.1148 | 0.0009 | 736  | 13  | 709  | 6  | 700  | 5  | 101.3 | 700        | 5  |
| 104 | 0.41 | 0.0736 | 0.0009 | 1.697  | 0.0185 | 0.1674 | 0.0013 | 1029 | 11  | 1007 | 7  | 997  | 7  | 101.0 | 997        | 7  |
| 105 | 0.37 | 0.0637 | 0.0019 | 0.9461 | 0.0269 | 0.1077 | 0.0009 | 733  | 64  | 676  | 14 | 659  | 5  | 102.6 | 659        | 5  |

Sample TK051, garnet-bearing metapelite, Kekesu valley, Akeyazi HP-LT belt, (Xia et al., 2014, Gondwana Research)

|    |      |        |        |        |        |        |        |      |     |      |    |      |    |       |            |    |
|----|------|--------|--------|--------|--------|--------|--------|------|-----|------|----|------|----|-------|------------|----|
| 1  | 0.73 | 0.0599 | 0.0008 | 0.6093 | 0.0070 | 0.0738 | 0.0005 | 600  | 13  | 483  | 4  | 459  | 3  | 105.2 | 459        | 3  |
| 2  | 0.72 | 0.1079 | 0.0010 | 4.688  | 0.0386 | 0.3151 | 0.0023 | 1765 | 7   | 1765 | 7  | 1766 | 11 | 99.9  | 1765       | 7  |
| 3  | 0.34 | 0.0613 | 0.0007 | 0.8906 | 0.0096 | 0.1055 | 0.0007 | 649  | 12  | 647  | 5  | 646  | 4  | 100.2 | 646        | 4  |
| 4  | 0.73 | 0.0560 | 0.0010 | 0.5572 | 0.0091 | 0.0722 | 0.0005 | 452  | 23  | 450  | 6  | 449  | 3  | 100.2 | 449        | 3  |
| 5  | 0.58 | 0.0651 | 0.0006 | 1.152  | 0.0084 | 0.1283 | 0.0009 | 779  | 7   | 778  | 4  | 778  | 5  | 100.0 | 778        | 5  |
| 6  | 0.93 | 0.0671 | 0.0023 | 1.068  | 0.0358 | 0.1155 | 0.0011 | 840  | 54  | 738  | 18 | 704  | 6  | 104.8 | 704        | 6  |
| 7  | 0.83 | 0.0558 | 0.0008 | 0.5382 | 0.0073 | 0.0700 | 0.0005 | 444  | 18  | 437  | 5  | 436  | 3  | 100.2 | 436        | 3  |
| 8  | 1.01 | 0.1650 | 0.0012 | 10.796 | 0.0575 | 0.4747 | 0.0031 | 2508 | 5   | 2506 | 5  | 2504 | 14 | 100.2 | 2508       | 5  |
| 9  | 0.51 | 0.0598 | 0.0010 | 0.6196 | 0.0100 | 0.0751 | 0.0006 | 597  | 22  | 490  | 6  | 467  | 3  | 104.9 | 467        | 3  |
| 10 | 0.76 | 0.0720 | 0.0008 | 1.596  | 0.0148 | 0.1607 | 0.0011 | 987  | 9   | 968  | 6  | 961  | 6  | 100.7 | 961        | 6  |
| 11 | 0.46 | 0.1025 | 0.0007 | 4.144  | 0.0227 | 0.2932 | 0.0019 | 1670 | 5   | 1663 | 4  | 1657 | 10 | 100.8 | 1670       | 5  |
| 12 | 0.42 | 0.0590 | 0.0011 | 0.5810 | 0.0103 | 0.0715 | 0.0005 | 566  | 26  | 465  | 7  | 445  | 3  | 104.5 | 445        | 3  |
| 13 | 0.90 | 0.0577 | 0.0009 | 0.5678 | 0.0086 | 0.0714 | 0.0006 | 518  | 20  | 457  | 6  | 444  | 3  | 102.9 | 444        | 3  |
| 14 | 0.72 | 0.1616 | 0.0020 | 10.247 | 0.1049 | 0.4598 | 0.0033 | 2473 | 22  | 2457 | 9  | 2439 | 15 | 101.4 | 2473       | 22 |
| 15 | 0.56 | 0.0786 | 0.0007 | 2.115  | 0.0145 | 0.1951 | 0.0013 | 1163 | 6   | 1154 | 5  | 1149 | 7  | 101.2 | 1163       | 6  |
| 16 | 0.64 | 0.0563 | 0.0022 | 0.5395 | 0.0206 | 0.0695 | 0.0006 | 465  | 89  | 438  | 14 | 433  | 4  | 101.2 | 433        | 4  |
| 17 | 0.42 | 0.1073 | 0.0010 | 4.628  | 0.0352 | 0.3129 | 0.0022 | 1754 | 6   | 1754 | 6  | 1755 | 11 | 99.9  | 1754       | 6  |
| 18 | 0.58 | 0.0570 | 0.0006 | 0.5804 | 0.0057 | 0.0739 | 0.0005 | 490  | 11  | 465  | 4  | 460  | 3  | 101.1 | 460        | 3  |
| 19 | 2.25 | 0.1611 | 0.0012 | 10.359 | 0.0571 | 0.4665 | 0.0031 | 2467 | 5   | 2467 | 5  | 2468 | 14 | 100.0 | 2467       | 5  |
| 20 | 0.38 | 0.1125 | 0.0013 | 5.128  | 0.0517 | 0.3307 | 0.0025 | 1840 | 9   | 1841 | 9  | 1842 | 12 | 99.9  | 1840       | 9  |
| 21 | 0.71 | 0.0625 | 0.0011 | 0.6392 | 0.0103 | 0.0742 | 0.0006 | 691  | 21  | 502  | 6  | 461  | 3  | 108.9 | 461        | 3  |
| 22 | 1.25 | 0.0557 | 0.0024 | 0.5439 | 0.0230 | 0.0709 | 0.0006 | 439  | 98  | 441  | 15 | 441  | 4  | 100.0 | 441        | 4  |
| 23 | 1.31 | 0.1576 | 0.0030 | 9.881  | 0.1665 | 0.4548 | 0.0037 | 2430 | 32  | 2424 | 16 | 2416 | 16 | 100.6 | 2430       | 32 |
| 24 | 0.48 | 0.0727 | 0.0006 | 1.895  | 0.0139 | 0.1890 | 0.0013 | 1006 | 7   | 1079 | 5  | 1116 | 7  | 90.1  | 1006       | 7  |
| 25 | 1.08 | 0.0678 | 0.0015 | 1.130  | 0.0239 | 0.1210 | 0.0010 | 861  | 30  | 768  | 11 | 736  | 6  | 104.3 | 736        | 6  |
| 26 | 0.52 | 0.1232 | 0.0013 | 6.189  | 0.0561 | 0.3644 | 0.0027 | 2003 | 7   | 2003 | 8  | 2003 | 13 | 100.0 | 2003       | 7  |
| 27 | 0.76 | 0.0784 | 0.0008 | 2.045  | 0.0175 | 0.1893 | 0.0013 | 1156 | 8   | 1131 | 6  | 1118 | 7  | 103.4 | 1156       | 8  |
| 28 | 0.47 | 0.1575 | 0.0017 | 8.654  | 0.0703 | 0.3985 | 0.0027 | 2429 | 18  | 2302 | 7  | 2162 | 13 | 112.3 | Discordant |    |
| 29 | 0.56 | 0.1115 | 0.0017 | 4.963  | 0.0670 | 0.3229 | 0.0024 | 1823 | 29  | 1813 | 11 | 1804 | 12 | 101.1 | 1823       | 29 |
| 30 | 0.98 | 0.1576 | 0.0012 | 9.938  | 0.0609 | 0.4576 | 0.0031 | 2430 | 5   | 2429 | 6  | 2429 | 14 | 100.0 | 2430       | 5  |
| 31 | 0.31 | 0.0668 | 0.0006 | 1.260  | 0.0084 | 0.1369 | 0.0009 | 831  | 6   | 828  | 4  | 827  | 5  | 100.1 | 827        | 5  |
| 32 | 0.34 | 0.1566 | 0.0012 | 9.837  | 0.0568 | 0.4556 | 0.0031 | 2420 | 5   | 2420 | 5  | 2420 | 14 | 100.0 | 2420       | 5  |
| 33 | 0.54 | 0.0564 | 0.0036 | 0.5882 | 0.0370 | 0.0756 | 0.0009 | 469  | 120 | 470  | 24 | 470  | 5  | 100.0 | 470        | 5  |
| 34 | 0.73 | 0.0570 | 0.0008 | 0.5448 | 0.0073 | 0.0694 | 0.0005 | 491  | 17  | 442  | 5  | 432  | 3  | 102.3 | 432        | 3  |
| 35 | 0.38 | 0.0625 | 0.0014 | 0.9771 | 0.0201 | 0.1135 | 0.0010 | 690  | 29  | 692  | 10 | 693  | 6  | 99.9  | 693        | 6  |
| 36 | 0.55 | 0.1147 | 0.0017 | 5.034  | 0.0646 | 0.3183 | 0.0023 | 1875 | 27  | 1825 | 11 | 1781 | 11 | 105.3 | 1875       | 27 |
| 37 | 0.79 | 0.0665 | 0.0014 | 1.229  | 0.0248 | 0.1341 | 0.0011 | 822  | 29  | 814  | 11 | 811  | 6  | 100.4 | 811        | 6  |
| 38 | 1.55 | 0.0576 | 0.0006 | 0.6082 | 0.0049 | 0.0766 | 0.0005 | 515  | 8   | 482  | 3  | 476  | 3  | 101.3 | 476        | 3  |
| 39 | 0.18 | 0.1125 | 0.0008 | 5.110  | 0.0296 | 0.3296 | 0.0022 | 1840 | 5   | 1838 | 5  | 1836 | 11 | 100.2 | 1840       | 5  |
| 40 | 0.19 | 0.1081 | 0.0008 | 4.704  | 0.0286 | 0.3157 | 0.0021 | 1767 | 5   | 1768 | 5  | 1769 | 10 | 99.9  | 1767       | 5  |
| 41 | 0.82 | 0.0581 | 0.0005 | 0.6864 | 0.0048 | 0.0858 | 0.0006 | 532  | 7   | 531  | 3  | 530  | 3  | 100.2 | 530        | 3  |
| 42 | 1.36 | 0.0591 | 0.0006 | 0.5589 | 0.0053 | 0.0686 | 0.0005 | 570  | 10  | 451  | 3  | 428  | 3  | 105.4 | 428        | 3  |
| 43 | 0.42 | 0.0773 | 0.0006 | 2.134  | 0.0138 | 0.2004 | 0.0014 | 1128 | 6   | 1160 | 4  | 1178 | 7  | 90.8  | 1128       | 6  |
| 44 | 0.81 | 0.0667 | 0.0007 | 1.263  | 0.0115 | 0.1375 | 0.0010 | 827  | 9   | 829  | 5  | 831  | 6  | 99.8  | 831        | 6  |
| 45 | 0.95 | 0.0558 | 0.0008 | 0.5431 | 0.0073 | 0.0707 | 0.0005 | 443  | 17  | 440  | 5  | 440  | 3  | 100.0 | 440        | 3  |
| 46 | 0.57 | 0.0551 | 0.0008 | 0.5024 | 0.0066 | 0.0661 | 0.0005 | 417  | 17  | 413  | 4  | 413  | 3  | 100.0 | 413        | 3  |
| 47 | 0.25 | 0.1931 | 0.0015 | 14.227 | 0.0895 | 0.5344 | 0.0037 | 2769 | 5   | 2765 | 6  | 2760 | 15 | 100.3 | 2769       | 5  |
| 48 | 0.34 | 0.1084 | 0.0016 | 2.696  | 0.0356 | 0.1804 | 0.0014 | 1772 | 28  | 1327 | 10 | 1069 | 7  | 165.8 | Discordant |    |
| 49 | 0.62 | 0.0742 | 0.0007 | 1.667  | 0.0132 | 0.1630 | 0.0011 | 1047 | 7   | 996  | 5  | 973  | 6  | 102.4 | 973        | 6  |
| 50 | 0.52 | 0.0562 | 0.0013 | 0.5723 | 0.0132 | 0.0739 | 0.0006 | 459  | 37  | 459  | 9  | 460  | 4  | 99.8  | 460        | 4  |
| 51 | 0.60 | 0.0602 | 0.0011 | 0.6345 | 0.0113 | 0.0765 | 0.0006 | 609  | 25  | 499  | 7  | 475  | 4  | 105.1 | 475        | 4  |
| 52 | 0.50 | 0.1593 | 0.0018 | 9.033  | 0.0791 | 0.4111 | 0.0029 | 2449 | 19  | 2341 | 8  | 2220 | 13 | 110.3 | Discordant |    |
| 53 | 0.91 | 0.0583 | 0.0006 | 0.7064 | 0.0059 | 0.0878 | 0.0006 | 543  | 8   | 543  | 4  | 543  | 4  | 100.0 | 543        | 4  |
| 54 | 0.28 | 0.0750 | 0.0008 | 1.737  | 0.0152 | 0.1681 | 0.0012 | 1068 | 8   | 1022 | 6  | 1001 | 7  | 106.7 | 1068       | 8  |
| 55 | 0.71 | 0.1603 | 0.0022 | 10.104 | 0.1136 | 0.4572 | 0.0034 | 2459 | 23  | 2444 | 10 | 2427 | 15 | 101.3 | 2459       | 23 |
| 56 | 0.60 | 0.3144 | 0.0024 | 30.299 | 0.1785 | 0.6992 | 0.0047 | 3543 | 5   | 3497 | 6  | 3417 | 18 | 103.7 | 3543       | 5  |
| 57 | 0.56 | 0.0584 | 0.0006 | 0.5637 | 0.0051 | 0.0700 | 0.0005 | 545  | 9   | 454  | 3  | 436  | 3  | 104.1 | 436        | 3  |
| 58 | 0.07 | 0.1549 | 0.0014 | 9.254  | 0.0549 | 0.4333 | 0.0028 | 2401 | 15  | 2363 | 5  | 2321 | 13 | 103.4 | 2401       | 15 |
| 59 | 1.26 | 0.1167 | 0.0029 | 5.063  | 0.1178 | 0.3148 | 0.0026 | 1906 | 45  | 1830 | 20 | 1764 | 13 | 108.0 | 1906       | 45 |
| 60 | 0.65 | 0.0565 | 0.0013 | 0.5823 | 0.0124 | 0.0747 | 0.0006 | 473  | 33  | 466  | 8  | 465  | 4  | 100.2 | 465        | 4  |
| 61 | 0.34 | 0.0575 | 0.0005 | 0.6519 | 0.0051 | 0.0823 | 0.0006 | 509  | 8   | 510  | 3  | 510  | 3  | 100.0 | 510        | 3  |
| 62 | 0.36 | 0.1270 | 0.0013 | 6.087  | 0.0528 | 0.3477 | 0.0026 | 2057 | 7   | 1988 | 8  | 1924 | 12 | 106.9 | 2057       | 7  |
| 63 | 0.57 | 0.0729 | 0.0016 | 1.479  | 0.0307 | 0.1473 | 0.0012 | 1010 | 28  | 922  | 13 | 886  | 7  | 104.1 | 886        | 7  |
| 64 | 0.62 | 0.1330 | 0.0011 | 6.908  | 0.0472 | 0.3768 | 0.0026 | 2138 | 5   | 2100 | 6  | 2061 | 12 | 103.7 | 2138       | 5  |
| 65 | 0.05 | 0.1498 | 0.0012 | 9.060  | 0.0559 | 0.4387 | 0.0029 | 2344 | 5   | 2344 | 6  | 2345 | 13 | 100.0 | 2344       | 5  |
| 66 | 0.23 | 0.1306 | 0.0011 | 6.577  | 0.0429 | 0.3653 | 0.0025 | 2106 | 5   | 2056 | 6  | 2007 | 12 | 104.9 | 2106       | 5  |
| 67 | 0.71 | 0.0731 | 0.0009 | 1.719  | 0.0180 | 0.1705 | 0.0012 | 1018 | 10  | 1016 | 7  | 1015 | 7  | 101.7 | 1018       | 10 |
| 68 | 0.61 | 0.0562 | 0.0006 | 0.5725 | 0.0054 | 0.0739 | 0.0005 | 461  | 10  | 460  | 3  | 459  | 3  | 100.2 | 459        | 3  |
| 69 | 0.44 | 0.0555 | 0.0008 | 0.5249 | 0.0070 | 0.0686 | 0.0005 | 433  | 17  | 428  | 5  | 428  | 3  | 100.0 | 428        | 3  |
| 70 | 0.66 | 0.0556 | 0.0009 | 0.5349 | 0.0082 | 0.0698 | 0.0005 | 436  | 21  | 435  | 5  | 435  | 3  | 100.0 | 435        | 3  |
| 71 | 0.64 | 0.0555 | 0.0009 | 0.5303 | 0.0081 | 0.0693 | 0.0005 | 431  | 21  | 432  | 5  | 432  | 3  | 100.0 | 432        | 3  |
| 72 | 0.86 | 0.0655 | 0.0007 | 1.181  | 0.0106 | 0.1309 | 0.0009 | 790  | 9   | 792  | 5  | 793  | 5  | 99.9  | 793        | 5  |
| 73 | 0.58 | 0.1963 | 0.0020 | 14.673 | 0.1284 | 0.5422 | 0.0042 | 2796 | 6   | 2794 | 8  | 2793 | 18 | 100.1 | 2796       | 6  |
| 74 | 0.45 | 0.0579 | 0.0010 | 0.5349 | 0.0086 | 0.0671 | 0.0005 | 524  | 22  | 435  | 6  | 418  | 3  | 104.1 | 418        | 3  |
| 75 | 0.83 | 0.1973 | 0.0029 | 14.302 | 0.1773 | 0.5257 | 0.0042 | 2804 | 25  | 2770 | 12 | 2723 | 18 | 103.0 | 2804       | 25 |

|     |      |        |        |        |        |        |        |      |    |      |    |      |    |       |            |    |
|-----|------|--------|--------|--------|--------|--------|--------|------|----|------|----|------|----|-------|------------|----|
| 76  | 0.40 | 0.0710 | 0.0017 | 1.486  | 0.0324 | 0.1519 | 0.0012 | 956  | 49 | 925  | 13 | 911  | 7  | 101.5 | 911        | 7  |
| 77  | 0.27 | 0.0796 | 0.0007 | 2.211  | 0.0159 | 0.2017 | 0.0014 | 1186 | 6  | 1185 | 5  | 1184 | 7  | 100.2 | 1186       | 6  |
| 78  | 0.94 | 0.0799 | 0.0012 | 2.083  | 0.0277 | 0.1890 | 0.0015 | 1196 | 14 | 1143 | 9  | 1116 | 8  | 107.2 | 1196       | 14 |
| 79  | 1.01 | 0.0557 | 0.0010 | 0.5350 | 0.0089 | 0.0698 | 0.0005 | 438  | 23 | 435  | 6  | 435  | 3  | 100.0 | 435        | 3  |
| 80  | 0.68 | 0.0660 | 0.0007 | 1.210  | 0.0106 | 0.1330 | 0.0009 | 806  | 8  | 805  | 5  | 805  | 5  | 100.0 | 805        | 5  |
| 81  | 0.75 | 0.0574 | 0.0010 | 0.5533 | 0.0092 | 0.0699 | 0.0005 | 507  | 23 | 447  | 6  | 436  | 3  | 102.5 | 436        | 3  |
| 82  | 1.10 | 0.1667 | 0.0014 | 9.865  | 0.0692 | 0.4292 | 0.0030 | 2525 | 5  | 2422 | 6  | 2302 | 13 | 109.7 | 2525       | 5  |
| 83  | 0.55 | 0.0680 | 0.0008 | 1.352  | 0.0142 | 0.1442 | 0.0011 | 869  | 11 | 868  | 6  | 868  | 6  | 100.0 | 868        | 6  |
| 84  | 0.81 | 0.0562 | 0.0006 | 0.5587 | 0.0052 | 0.0722 | 0.0005 | 459  | 10 | 451  | 3  | 449  | 3  | 100.4 | 449        | 3  |
| 85  | 0.74 | 0.0566 | 0.0012 | 0.5748 | 0.0114 | 0.0736 | 0.0006 | 477  | 30 | 461  | 7  | 458  | 4  | 100.7 | 458        | 4  |
| 86  | 0.61 | 0.0679 | 0.0019 | 0.6764 | 0.0186 | 0.0723 | 0.0006 | 864  | 61 | 525  | 11 | 450  | 3  | 116.7 | Discordant |    |
| 87  | 0.55 | 0.0575 | 0.0013 | 0.6518 | 0.0145 | 0.0823 | 0.0007 | 510  | 34 | 510  | 9  | 510  | 4  | 100.0 | 510        | 4  |
| 88  | 0.44 | 0.0555 | 0.0006 | 0.5289 | 0.0049 | 0.0692 | 0.0005 | 432  | 10 | 431  | 3  | 431  | 3  | 100.0 | 431        | 3  |
| 89  | 0.77 | 0.0740 | 0.0008 | 1.744  | 0.0175 | 0.1709 | 0.0012 | 1042 | 10 | 1025 | 6  | 1017 | 7  | 102.5 | 1042       | 10 |
| 90  | 0.38 | 0.1044 | 0.0010 | 3.583  | 0.0284 | 0.2491 | 0.0017 | 1703 | 7  | 1546 | 6  | 1434 | 9  | 118.8 | Discordant |    |
| 91  | 0.45 | 0.0565 | 0.0008 | 0.5944 | 0.0073 | 0.0763 | 0.0006 | 473  | 15 | 474  | 5  | 474  | 3  | 100.0 | 474        | 3  |
| 92  | 0.03 | 0.1070 | 0.0010 | 4.588  | 0.0348 | 0.3112 | 0.0022 | 1749 | 6  | 1747 | 6  | 1746 | 11 | 100.2 | 1749       | 6  |
| 93  | 0.45 | 0.0566 | 0.0010 | 0.5946 | 0.0094 | 0.0762 | 0.0006 | 477  | 22 | 474  | 6  | 473  | 3  | 100.2 | 473        | 3  |
| 94  | 0.38 | 0.0995 | 0.0009 | 3.898  | 0.0309 | 0.2843 | 0.0020 | 1614 | 7  | 1613 | 6  | 1613 | 10 | 100.1 | 1614       | 7  |
| 95  | 0.98 | 0.0693 | 0.0017 | 1.275  | 0.0290 | 0.1336 | 0.0014 | 906  | 30 | 835  | 13 | 808  | 8  | 103.3 | 808        | 8  |
| 96  | 0.13 | 0.1527 | 0.0016 | 8.591  | 0.0666 | 0.4080 | 0.0028 | 2377 | 18 | 2296 | 7  | 2206 | 13 | 107.8 | 2377       | 18 |
| 97  | 0.66 | 0.0573 | 0.0007 | 0.6038 | 0.0065 | 0.0764 | 0.0006 | 505  | 12 | 480  | 4  | 475  | 3  | 101.1 | 475        | 3  |
| 98  | 0.70 | 0.0580 | 0.0009 | 0.6296 | 0.0088 | 0.0787 | 0.0006 | 531  | 18 | 496  | 5  | 488  | 4  | 101.6 | 488        | 4  |
| 99  | 0.18 | 0.1180 | 0.0018 | 2.362  | 0.0322 | 0.1452 | 0.0010 | 1927 | 28 | 1231 | 10 | 874  | 6  | 140.8 | Discordant |    |
| 100 | 0.44 | 0.1776 | 0.0016 | 12.329 | 0.0977 | 0.5036 | 0.0036 | 2631 | 6  | 2630 | 7  | 2629 | 15 | 100.1 | 2631       | 6  |
| 101 | 0.57 | 0.1379 | 0.0014 | 8.688  | 0.0767 | 0.4571 | 0.0034 | 2201 | 7  | 2306 | 8  | 2427 | 15 | 90.7  | 2201       | 7  |

Sample TK071, garnet-bearing metapelite, Kekesu valley, Akeyazi HP-LT belt, (Xia et al., 2014, Gondwana Research)

|    |      |        |        |        |        |        |        |      |     |      |    |      |    |       |            |     |
|----|------|--------|--------|--------|--------|--------|--------|------|-----|------|----|------|----|-------|------------|-----|
| 1  | 0.60 | 0.0669 | 0.0015 | 1.266  | 0.0391 | 0.1386 | 0.0022 | 834  | 39  | 830  | 18 | 837  | 12 | 99.2  | 837        | 12  |
| 2  | 0.15 | 0.0701 | 0.0013 | 1.704  | 0.0461 | 0.1727 | 0.0027 | 931  | 31  | 1010 | 17 | 1027 | 15 | 90.7  | 931        | 31  |
| 3  | 0.38 | 0.1255 | 0.0025 | 5.147  | 0.1748 | 0.2904 | 0.0046 | 2035 | 38  | 1844 | 29 | 1644 | 23 | 123.8 | Discordant |     |
| 4  | 0.95 | 0.0704 | 0.0014 | 1.639  | 0.0463 | 0.1677 | 0.0026 | 941  | 33  | 985  | 18 | 999  | 14 | 98.6  | 999        | 14  |
| 5  | 0.22 | 0.1171 | 0.0020 | 5.597  | 0.1501 | 0.3454 | 0.0053 | 1912 | 27  | 1916 | 23 | 1913 | 25 | 99.9  | 1912       | 27  |
| 6  | 0.30 | 0.0744 | 0.0014 | 1.934  | 0.0526 | 0.1891 | 0.0029 | 1053 | 31  | 1093 | 18 | 1116 | 16 | 94.4  | 1053       | 31  |
| 7  | 0.66 | 0.0572 | 0.0018 | 0.5835 | 0.0235 | 0.0747 | 0.0013 | 497  | 59  | 467  | 15 | 465  | 7  | 100.4 | 465        | 7   |
| 8  | 0.49 | 0.1059 | 0.0021 | 4.793  | 0.1627 | 0.3282 | 0.0052 | 1731 | 39  | 1784 | 29 | 1830 | 25 | 94.6  | 1731       | 39  |
| 9  | 0.60 | 0.0954 | 0.0033 | 2.804  | 0.1367 | 0.2251 | 0.0039 | 1537 | 66  | 1357 | 36 | 1309 | 20 | 117.4 | Discordant |     |
| 10 | 0.60 | 0.0555 | 0.0023 | 0.5528 | 0.0264 | 0.0708 | 0.0012 | 432  | 77  | 447  | 17 | 441  | 7  | 101.4 | 441        | 7   |
| 11 | 0.93 | 0.0639 | 0.0018 | 1.130  | 0.0426 | 0.1264 | 0.0020 | 737  | 52  | 768  | 20 | 767  | 12 | 100.1 | 767        | 12  |
| 12 | 0.56 | 0.0915 | 0.0037 | 3.131  | 0.1152 | 0.2483 | 0.0040 | 1456 | 78  | 1440 | 28 | 1430 | 21 | 101.8 | 1456       | 78  |
| 13 | 0.56 | 0.1001 | 0.0017 | 4.033  | 0.1031 | 0.2935 | 0.0045 | 1626 | 26  | 1641 | 21 | 1659 | 22 | 98.0  | 1626       | 26  |
| 14 | 1.27 | 0.0674 | 0.0014 | 1.324  | 0.0412 | 0.1434 | 0.0022 | 849  | 39  | 856  | 18 | 864  | 13 | 99.1  | 864        | 13  |
| 15 | 0.62 | 0.0680 | 0.0016 | 1.226  | 0.0395 | 0.1313 | 0.0021 | 869  | 41  | 813  | 18 | 795  | 12 | 102.3 | 795        | 12  |
| 16 | 0.52 | 0.0987 | 0.0018 | 3.788  | 0.1036 | 0.2803 | 0.0043 | 1599 | 29  | 1590 | 22 | 1593 | 22 | 100.4 | 1599       | 29  |
| 17 | 2.64 | 0.0663 | 0.0019 | 1.241  | 0.0478 | 0.1358 | 0.0022 | 815  | 53  | 819  | 22 | 821  | 12 | 99.8  | 821        | 12  |
| 18 | 0.10 | 0.0738 | 0.0014 | 1.548  | 0.0416 | 0.1568 | 0.0024 | 1036 | 30  | 950  | 17 | 939  | 13 | 101.2 | 939        | 13  |
| 19 | 0.82 | 0.0580 | 0.0016 | 0.7574 | 0.0265 | 0.0928 | 0.0015 | 531  | 49  | 573  | 15 | 572  | 9  | 100.2 | 572        | 9   |
| 20 | 0.28 | 0.0710 | 0.0015 | 1.574  | 0.0477 | 0.1606 | 0.0025 | 958  | 37  | 960  | 19 | 960  | 14 | 100.0 | 960        | 14  |
| 21 | 0.99 | 0.0746 | 0.0019 | 1.733  | 0.0681 | 0.1719 | 0.0028 | 1058 | 53  | 1021 | 25 | 1022 | 15 | 103.5 | 1058       | 53  |
| 22 | 0.64 | 0.0707 | 0.0014 | 1.299  | 0.0361 | 0.1366 | 0.0021 | 950  | 32  | 845  | 16 | 825  | 12 | 102.4 | 825        | 12  |
| 23 | 0.11 | 0.1043 | 0.0034 | 3.882  | 0.1115 | 0.2698 | 0.0041 | 1703 | 61  | 1610 | 23 | 1540 | 21 | 110.6 | Discordant |     |
| 24 | 0.82 | 0.0547 | 0.0014 | 0.5593 | 0.0187 | 0.0750 | 0.0012 | 398  | 47  | 451  | 12 | 466  | 7  | 96.8  | 466        | 7   |
| 25 | 0.84 | 0.0679 | 0.0020 | 1.451  | 0.0593 | 0.1519 | 0.0025 | 866  | 58  | 910  | 25 | 912  | 14 | 99.8  | 912        | 14  |
| 26 | 0.01 | 0.1445 | 0.0069 | 6.794  | 0.6701 | 0.3768 | 0.0100 | 2282 | 134 | 2085 | 87 | 2062 | 47 | 110.7 | Discordant |     |
| 27 | 0.71 | 0.0662 | 0.0016 | 0.8880 | 0.0295 | 0.0966 | 0.0015 | 814  | 43  | 645  | 16 | 595  | 9  | 108.4 | 595        | 9   |
| 28 | 0.63 | 0.0577 | 0.0030 | 0.6001 | 0.0298 | 0.0755 | 0.0012 | 517  | 118 | 477  | 19 | 469  | 7  | 101.7 | 469        | 7   |
| 29 | 0.97 | 0.2773 | 0.0051 | 28.340 | 0.8171 | 0.7286 | 0.0111 | 3348 | 26  | 3431 | 28 | 3528 | 41 | 94.9  | 3348       | 26  |
| 30 | 0.58 | 0.0664 | 0.0014 | 1.261  | 0.0368 | 0.1373 | 0.0021 | 819  | 36  | 828  | 17 | 830  | 12 | 99.8  | 830        | 12  |
| 31 | 0.69 | 0.0547 | 0.0013 | 0.5517 | 0.0177 | 0.0729 | 0.0011 | 399  | 44  | 446  | 12 | 454  | 7  | 98.2  | 454        | 7   |
| 32 | 0.59 | 0.0548 | 0.0014 | 0.5586 | 0.0187 | 0.0735 | 0.0012 | 406  | 47  | 451  | 12 | 457  | 7  | 98.7  | 457        | 7   |
| 33 | 0.48 | 0.1211 | 0.0023 | 2.850  | 0.0781 | 0.1723 | 0.0026 | 1972 | 28  | 1369 | 21 | 1025 | 14 | 192.4 | Discordant |     |
| 34 | 0.40 | 0.1000 | 0.0019 | 3.961  | 0.1112 | 0.2852 | 0.0044 | 1623 | 30  | 1626 | 23 | 1617 | 22 | 100.4 | 1623       | 30  |
| 35 | 0.68 | 0.0576 | 0.0017 | 0.5564 | 0.0207 | 0.0723 | 0.0012 | 515  | 54  | 449  | 14 | 450  | 7  | 99.8  | 450        | 7   |
| 36 | 0.86 | 0.1759 | 0.0034 | 12.005 | 0.3702 | 0.5016 | 0.0077 | 2615 | 31  | 2605 | 29 | 2621 | 33 | 99.8  | 2615       | 31  |
| 37 | 0.18 | 0.0718 | 0.0015 | 1.731  | 0.0528 | 0.1718 | 0.0026 | 980  | 37  | 1020 | 20 | 1022 | 15 | 95.9  | 980        | 37  |
| 38 | 1.08 | 0.0570 | 0.0019 | 0.5583 | 0.0229 | 0.0724 | 0.0012 | 493  | 62  | 450  | 15 | 450  | 7  | 100.0 | 450        | 7   |
| 39 | 0.79 | 0.0559 | 0.0016 | 0.5460 | 0.0197 | 0.0706 | 0.0011 | 449  | 52  | 442  | 13 | 440  | 7  | 100.5 | 440        | 7   |
| 40 | 0.09 | 0.0988 | 0.0020 | 3.685  | 0.1090 | 0.2754 | 0.0042 | 1602 | 33  | 1568 | 24 | 1568 | 21 | 102.2 | 1602       | 33  |
| 41 | 1.23 | 0.0616 | 0.0015 | 0.6597 | 0.0223 | 0.0783 | 0.0012 | 660  | 46  | 514  | 14 | 486  | 7  | 105.8 | 486        | 7   |
| 42 | 0.73 | 0.0772 | 0.0019 | 2.146  | 0.0762 | 0.1978 | 0.0031 | 1125 | 46  | 1164 | 25 | 1164 | 17 | 96.6  | 1125       | 46  |
| 43 | 0.88 | 0.0640 | 0.0021 | 1.286  | 0.0559 | 0.1377 | 0.0022 | 740  | 64  | 840  | 25 | 831  | 13 | 101.1 | 831        | 13  |
| 44 | 0.49 | 0.0986 | 0.0021 | 3.603  | 0.1163 | 0.2718 | 0.0042 | 1597 | 37  | 1550 | 26 | 1550 | 21 | 103.0 | 1597       | 37  |
| 45 | 0.90 | 0.0558 | 0.0015 | 0.5379 | 0.0190 | 0.0700 | 0.0011 | 443  | 51  | 437  | 13 | 436  | 7  | 100.2 | 436        | 7   |
| 46 | 1.13 | 0.0562 | 0.0026 | 0.5691 | 0.0307 | 0.0723 | 0.0012 | 461  | 90  | 457  | 20 | 450  | 7  | 101.6 | 450        | 7   |
| 47 | 0.55 | 0.0704 | 0.0016 | 1.452  | 0.0465 | 0.1508 | 0.0023 | 939  | 41  | 911  | 19 | 905  | 13 | 100.7 | 905        | 13  |
| 48 | 0.94 | 0.0568 | 0.0015 | 0.5585 | 0.0198 | 0.0713 | 0.0011 | 483  | 51  | 451  | 13 | 444  | 7  | 101.6 | 444        | 7   |
| 49 | 0.78 | 0.1644 | 0.0036 | 11.175 | 0.3574 | 0.4820 | 0.0074 | 2501 | 33  | 2538 | 30 | 2536 | 32 | 98.6  | 2501       | 33  |
| 50 | 0.70 | 0.0676 | 0.0017 | 1.264  | 0.0443 | 0.1358 | 0.0021 | 855  | 47  | 830  | 20 | 821  | 12 | 101.1 | 821        | 12  |
| 51 | 0.62 | 0.0666 | 0.0016 | 1.272  | 0.0423 | 0.1382 | 0.0021 | 825  | 44  | 833  | 19 | 834  | 12 | 99.9  | 834        | 12  |
| 52 | 0.89 | 0.0597 | 0.0019 | 0.5645 | 0.0232 | 0.0675 | 0.0011 | 593  | 61  | 454  | 15 | 421  | 7  | 107.8 | 421        | 7   |
| 53 | 0.64 | 0.0572 | 0.0015 | 0.5467 | 0.0197 | 0.0690 | 0.0011 | 499  | 52  | 443  | 13 | 430  | 7  | 103.0 | 430        | 7   |
| 54 | 0.19 | 0.0751 | 0.0018 | 1.874  | 0.0636 | 0.1802 | 0.0028 | 1070 | 43  | 1072 | 22 | 1068 | 15 | 100.2 | 1070       | 43  |
| 55 | 0.66 | 0.0564 | 0.0022 | 0.5547 | 0.0263 | 0.0708 | 0.0012 | 466  | 76  | 448  | 17 | 441  | 7  | 101.6 | 441        | 7   |
| 56 | 0.34 | 0.0728 | 0.0027 | 1.812  | 0.0964 | 0.1758 | 0.0030 | 1007 | 80  | 1050 | 35 | 1044 | 17 | 96.5  | 1007       | 80  |
| 57 | 0.21 | 0.0738 | 0.0017 | 1.847  | 0.0622 | 0.1791 | 0.0028 | 1037 | 43  | 1062 | 22 | 1062 | 15 | 97.6  | 1037       | 43  |
| 58 | 0.46 | 0.0867 | 0.0020 | 2.679  | 0.0915 | 0.2279 | 0.0035 | 1353 | 42  | 1323 | 25 | 1324 | 18 | 102.2 | 1353       | 42  |
| 59 | 0.82 | 0.0684 | 0.0043 | 1.233  | 0.0749 | 0.1307 | 0.0022 | 881  | 134 | 816  | 34 | 792  | 13 | 103.0 | 792        | 13  |
| 60 | 0.25 | 0.0566 | 0.0031 | 0.5392 | 0.0278 | 0.0691 | 0.0011 | 477  | 123 | 438  | 18 | 430  | 7  | 101.9 | 430        | 7   |
| 61 | 0.23 | 0.0570 | 0.0037 | 0.4509 | 0.0283 | 0.0573 | 0.0009 | 493  | 147 | 378  | 20 | 359  | 6  | 105.3 | 359        | 6   |
| 62 | 0.79 | 0.0821 | 0.0029 | 1.980  | 0.1037 | 0.1819 | 0.0031 | 1248 | 76  | 1109 | 35 | 1077 | 17 | 115.9 | Discordant |     |
| 63 | 0.68 | 0.0563 | 0.0022 | 0.5472 | 0.0265 | 0.0712 | 0.0012 | 464  | 77  | 443  | 17 | 443  | 7  | 100.0 | 443        | 7   |
| 64 | 0.41 | 0.0825 | 0.0042 | 2.388  | 0.1139 | 0.2101 | 0.0034 | 1256 | 101 | 1239 | 34 | 1229 | 18 | 102.2 | 1256       | 101 |
| 65 | 0.55 | 0.0707 | 0.0018 | 1.133  | 0.0406 | 0.1141 | 0.0018 | 949  | 48  | 769  | 19 | 697  | 10 | 110.3 | Discordant |     |
| 66 | 0.65 | 0.0667 | 0.0019 | 1.299  | 0.0517 | 0.1392 | 0.0022 | 830  | 57  | 845  | 23 | 840  | 12 | 100.6 | 840        | 12  |
| 67 | 0.82 | 0.0728 | 0.0019 | 1.329  | 0.0487 | 0.1304 | 0.0020 | 1008 | 49  | 858  | 21 | 790  | 12 | 108.6 | 790        | 12  |
| 68 | 0.65 | 0.0664 | 0.0018 | 1.176  | 0.0459 | 0.1295 | 0.0020 | 819  | 55  | 789  | 21 | 785  | 12 | 100.5 | 785        | 12  |
| 69 | 1.10 | 0.0565 | 0.0021 | 0.5615 | 0.0265 | 0.0725 | 0.0012 | 472  | 75  | 452  | 17 | 451  | 7  | 100.2 | 451        | 7   |
| 70 | 0.77 | 0.0777 | 0.0023 | 1.988  | 0.0849 | 0.1871 | 0.0030 | 1140 | 59  | 1112 | 29 | 1106 | 16 | 103.1 | 1140       | 59  |
| 71 | 1.20 | 0.0802 | 0.0031 | 2.045  | 0.1063 | 0.1907 | 0.0032 | 1201 | 76  | 1131 | 35 | 1125 | 17 | 106.8 | 1201       | 76  |
| 72 | 0.86 | 0.0769 | 0.0024 | 1.744  | 0.0759 | 0.1640 | 0.0026 | 1119 | 61  | 1025 | 28 | 979  | 15 | 104.7 | 979        | 15  |
| 73 | 0.82 | 0.1705 | 0.0045 | 11.398 | 0.4413 | 0.4798 | 0.0075 | 2562 | 44  | 2556 | 36 | 2526 | 33 | 101.4 | 2562       | 44  |
| 74 | 1.41 | 0.0705 | 0.0019 | 1.046  | 0.0394 | 0.1072 | 0.0017 | 942  | 52  | 727  | 20 | 656  | 10 | 110.8 | Discordant |     |
| 75 | 0.86 | 0.0566 | 0.0021 | 0.5487 | 0.0258 | 0.0705 | 0.0011 | 477  | 75  | 444  | 17 | 439  | 7  | 101.1 | 439        | 7   |
| 76 | 1.49 | 0.0570 | 0.0020 | 0.5544 | 0.0253 | 0.0706 | 0.0012 | 490  | 72  | 448  | 17 | 440  | 7  | 101.8 | 440        | 7   |
| 77 | 1.91 | 0.0670 | 0.0028 | 1.182  | 0.0706 | 0.1308 | 0.0023 | 837  | 95  | 792  | 33 | 793  | 13 | 99.9  | 793        | 13  |
| 78 | 0.12 | 0.1330 | 0.0036 | 6.002  | 0.2346 | 0.3251 | 0.0051 | 2138 | 46  | 1976 | 34 | 1815 | 25 | 117.8 | Discordant |     |
| 79 | 0.68 | 0.0554 | 0.0041 | 0.5530 | 0.0461 | 0.0714 | 0.0013 | 430  | 155 | 447  | 30 | 445  | 8  | 100.4 | 445        | 8   |
| 80 | 1.09 | 0.1318 | 0.0037 | 6.498  | 0.2648 | 0.3533 | 0.0056 | 2123 |     |      |    |      |    |       |            |     |

|    |      |        |        |        |        |        |        |      |     |      |    |      |    |       |      |    |
|----|------|--------|--------|--------|--------|--------|--------|------|-----|------|----|------|----|-------|------|----|
| 92 | 0.70 | 0.0564 | 0.0029 | 0.5588 | 0.0351 | 0.0726 | 0.0013 | 466  | 108 | 451  | 23 | 452  | 8  | 99.8  | 452  | 8  |
| 93 | 0.39 | 0.0727 | 0.0023 | 1.524  | 0.0671 | 0.1554 | 0.0025 | 1006 | 63  | 940  | 27 | 931  | 14 | 101.0 | 931  | 14 |
| 94 | 0.59 | 0.0575 | 0.0019 | 0.6113 | 0.0273 | 0.0771 | 0.0012 | 511  | 70  | 484  | 17 | 479  | 7  | 101.0 | 479  | 7  |
| 95 | 1.12 | 0.0580 | 0.0021 | 0.5588 | 0.0267 | 0.0699 | 0.0011 | 530  | 76  | 451  | 17 | 436  | 7  | 103.4 | 436  | 7  |
| 96 | 0.68 | 0.0885 | 0.0028 | 2.806  | 0.1293 | 0.2253 | 0.0036 | 1394 | 64  | 1357 | 35 | 1310 | 19 | 106.4 | 1394 | 64 |
| 97 | 0.36 | 0.0803 | 0.0025 | 2.083  | 0.0943 | 0.1869 | 0.0030 | 1204 | 64  | 1143 | 31 | 1104 | 16 | 109.1 | 1204 | 64 |
| 98 | 0.84 | 0.1933 | 0.0062 | 12.836 | 0.6485 | 0.4986 | 0.0081 | 2770 | 61  | 2668 | 48 | 2608 | 35 | 106.2 | 2770 | 61 |

Sample TK090, mica quartzite, Keesu valley, Akeyazi HP-LT belt, (Xia et al., 2014, Gondwana Research)

|    |      |        |        |        |        |        |        |      |     |      |    |      |    |       |            |    |
|----|------|--------|--------|--------|--------|--------|--------|------|-----|------|----|------|----|-------|------------|----|
| 1  | 0.75 | 0.0582 | 0.0026 | 0.5163 | 0.0229 | 0.0643 | 0.0007 | 538  | 78  | 423  | 15 | 402  | 4  | 105.2 | 402        | 4  |
| 2  | 0.24 | 0.0594 | 0.0010 | 0.7682 | 0.0121 | 0.0939 | 0.0007 | 580  | 22  | 579  | 7  | 578  | 4  | 100.2 | 578        | 4  |
| 3  | 0.47 | 0.0943 | 0.0007 | 3.440  | 0.0178 | 0.2647 | 0.0018 | 1514 | 6   | 1514 | 4  | 1514 | 9  | 100.0 | 1514       | 6  |
| 4  | 0.62 | 0.0552 | 0.0015 | 0.4915 | 0.0132 | 0.0645 | 0.0005 | 422  | 64  | 406  | 9  | 403  | 3  | 100.7 | 403        | 3  |
| 5  | 0.35 | 0.1607 | 0.0012 | 10.297 | 0.0562 | 0.4648 | 0.0032 | 2463 | 5   | 2462 | 5  | 2461 | 14 | 100.1 | 2463       | 5  |
| 6  | 1.01 | 0.0739 | 0.0008 | 1.656  | 0.0164 | 0.1625 | 0.0012 | 1039 | 10  | 992  | 6  | 971  | 6  | 102.2 | 971        | 6  |
| 7  | 0.43 | 0.0898 | 0.0012 | 3.047  | 0.0360 | 0.2461 | 0.0018 | 1422 | 12  | 1419 | 9  | 1418 | 9  | 100.3 | 1422       | 12 |
| 8  | 0.35 | 0.0759 | 0.0010 | 1.724  | 0.0181 | 0.1647 | 0.0011 | 1093 | 26  | 1018 | 7  | 983  | 6  | 103.6 | 983        | 6  |
| 9  | 0.34 | 0.0560 | 0.0005 | 0.5422 | 0.0044 | 0.0703 | 0.0005 | 452  | 8   | 440  | 3  | 438  | 3  | 100.5 | 438        | 3  |
| 10 | 0.43 | 0.0637 | 0.0010 | 0.9820 | 0.0144 | 0.1117 | 0.0008 | 733  | 35  | 695  | 7  | 683  | 5  | 101.8 | 683        | 5  |
| 11 | 0.59 | 0.1111 | 0.0009 | 4.936  | 0.0318 | 0.3223 | 0.0022 | 1817 | 6   | 1808 | 5  | 1801 | 11 | 100.9 | 1817       | 6  |
| 12 | 0.64 | 0.0656 | 0.0015 | 1.153  | 0.0253 | 0.1275 | 0.0010 | 794  | 50  | 779  | 12 | 773  | 5  | 100.8 | 773        | 5  |
| 13 | 0.30 | 0.0682 | 0.0015 | 1.181  | 0.0235 | 0.1256 | 0.0010 | 875  | 45  | 792  | 11 | 762  | 6  | 103.9 | 762        | 6  |
| 14 | 1.77 | 0.1404 | 0.0012 | 7.475  | 0.0532 | 0.3863 | 0.0027 | 2232 | 6   | 2170 | 6  | 2105 | 13 | 106.0 | 2232       | 6  |
| 15 | 0.41 | 0.0724 | 0.0008 | 0.7333 | 0.0070 | 0.0735 | 0.0005 | 997  | 9   | 558  | 4  | 457  | 3  | 122.1 | Discordant |    |
| 16 | 1.07 | 0.1525 | 0.0024 | 6.547  | 0.0894 | 0.3114 | 0.0024 | 2374 | 27  | 2052 | 12 | 1748 | 12 | 135.8 | Discordant |    |
| 17 | 1.26 | 0.0867 | 0.0018 | 1.567  | 0.0317 | 0.1311 | 0.0011 | 1353 | 26  | 957  | 13 | 794  | 6  | 120.5 | Discordant |    |
| 18 | 0.28 | 0.0583 | 0.0008 | 0.5376 | 0.0072 | 0.0669 | 0.0005 | 541  | 17  | 437  | 5  | 417  | 3  | 104.8 | 417        | 3  |
| 19 | 0.55 | 0.1302 | 0.0010 | 6.614  | 0.0408 | 0.3686 | 0.0025 | 2101 | 5   | 2061 | 5  | 2023 | 12 | 103.9 | 2101       | 5  |
| 20 | 0.84 | 0.0634 | 0.0018 | 1.051  | 0.0284 | 0.1203 | 0.0009 | 720  | 61  | 730  | 14 | 733  | 5  | 99.6  | 733        | 5  |
| 21 | 0.73 | 0.0604 | 0.0005 | 0.5853 | 0.0035 | 0.0703 | 0.0005 | 619  | 6   | 468  | 2  | 438  | 3  | 106.8 | 438        | 3  |
| 22 | 0.91 | 0.0560 | 0.0016 | 0.5615 | 0.0153 | 0.0728 | 0.0005 | 450  | 64  | 453  | 10 | 453  | 3  | 100.0 | 453        | 3  |
| 23 | 0.23 | 0.0727 | 0.0005 | 1.411  | 0.0073 | 0.1408 | 0.0009 | 1006 | 6   | 894  | 3  | 849  | 5  | 105.3 | 849        | 5  |
| 24 | 0.93 | 0.0564 | 0.0009 | 0.5331 | 0.0079 | 0.0686 | 0.0005 | 469  | 20  | 434  | 5  | 427  | 3  | 101.6 | 427        | 3  |
| 25 | 0.56 | 0.0640 | 0.0011 | 0.7119 | 0.0112 | 0.0807 | 0.0006 | 743  | 21  | 546  | 7  | 500  | 4  | 109.2 | 500        | 4  |
| 26 | 0.12 | 0.0752 | 0.0006 | 1.829  | 0.0107 | 0.1763 | 0.0012 | 1075 | 6   | 1056 | 4  | 1047 | 6  | 102.7 | 1075       | 6  |
| 27 | 0.44 | 0.1049 | 0.0016 | 4.412  | 0.0572 | 0.3049 | 0.0023 | 1713 | 28  | 1715 | 11 | 1716 | 11 | 99.8  | 1713       | 28 |
| 28 | 1.18 | 0.1147 | 0.0030 | 4.766  | 0.1202 | 0.3016 | 0.0032 | 1874 | 30  | 1779 | 21 | 1699 | 16 | 110.3 | Discordant |    |
| 29 | 0.56 | 0.0586 | 0.0012 | 0.5531 | 0.0112 | 0.0685 | 0.0005 | 552  | 30  | 447  | 7  | 427  | 3  | 104.7 | 427        | 3  |
| 30 | 0.72 | 0.0655 | 0.0015 | 1.135  | 0.0249 | 0.1256 | 0.0009 | 791  | 50  | 770  | 12 | 763  | 5  | 100.9 | 763        | 5  |
| 31 | 0.17 | 0.0868 | 0.0007 | 2.743  | 0.0170 | 0.2292 | 0.0016 | 1357 | 6   | 1340 | 5  | 1330 | 8  | 102.0 | 1357       | 6  |
| 32 | 1.15 | 0.0829 | 0.0009 | 1.692  | 0.0161 | 0.1481 | 0.0011 | 1266 | 9   | 1005 | 6  | 890  | 6  | 112.9 | Discordant |    |
| 33 | 1.03 | 0.0660 | 0.0007 | 1.058  | 0.0092 | 0.1164 | 0.0008 | 805  | 8   | 733  | 5  | 710  | 5  | 103.2 | 710        | 5  |
| 34 | 1.14 | 0.0681 | 0.0027 | 1.184  | 0.0463 | 0.1261 | 0.0011 | 871  | 85  | 793  | 22 | 766  | 6  | 103.5 | 766        | 6  |
| 35 | 0.50 | 0.0659 | 0.0011 | 0.9113 | 0.0139 | 0.1003 | 0.0007 | 803  | 36  | 658  | 7  | 616  | 4  | 106.8 | 616        | 4  |
| 36 | 0.56 | 0.0576 | 0.0014 | 0.5096 | 0.0121 | 0.0642 | 0.0005 | 513  | 56  | 418  | 8  | 401  | 3  | 104.2 | 401        | 3  |
| 37 | 0.56 | 0.0589 | 0.0006 | 0.5994 | 0.0049 | 0.0738 | 0.0005 | 563  | 8   | 477  | 3  | 459  | 3  | 103.9 | 459        | 3  |
| 38 | 0.60 | 0.0550 | 0.0012 | 0.4839 | 0.0097 | 0.0639 | 0.0005 | 411  | 31  | 401  | 7  | 399  | 3  | 100.5 | 399        | 3  |
| 39 | 0.61 | 0.0549 | 0.0038 | 0.5017 | 0.0343 | 0.0663 | 0.0007 | 408  | 135 | 413  | 23 | 414  | 4  | 99.8  | 414        | 4  |
| 40 | 0.66 | 0.0674 | 0.0012 | 1.281  | 0.0220 | 0.1380 | 0.0011 | 849  | 23  | 837  | 10 | 833  | 6  | 100.5 | 833        | 6  |
| 41 | 0.67 | 0.0565 | 0.0016 | 0.6023 | 0.0162 | 0.0774 | 0.0006 | 471  | 63  | 479  | 10 | 480  | 4  | 99.8  | 480        | 4  |
| 42 | 0.59 | 0.1171 | 0.0017 | 5.556  | 0.0697 | 0.3440 | 0.0025 | 1913 | 27  | 1909 | 11 | 1906 | 12 | 100.4 | 1913       | 27 |
| 43 | 0.56 | 0.1395 | 0.0009 | 7.099  | 0.0343 | 0.3693 | 0.0024 | 2221 | 5   | 2124 | 4  | 2026 | 11 | 109.6 | 2221       | 5  |
| 44 | 1.29 | 0.0703 | 0.0022 | 1.261  | 0.0382 | 0.1301 | 0.0013 | 937  | 46  | 828  | 17 | 788  | 7  | 105.1 | 788        | 7  |
| 45 | 0.76 | 0.1071 | 0.0009 | 4.607  | 0.0318 | 0.3120 | 0.0022 | 1751 | 6   | 1751 | 6  | 1751 | 11 | 100.0 | 1751       | 6  |
| 46 | 0.77 | 0.0719 | 0.0015 | 1.452  | 0.0291 | 0.1466 | 0.0011 | 982  | 44  | 911  | 12 | 882  | 6  | 103.3 | 882        | 6  |
| 47 | 0.46 | 0.0735 | 0.0019 | 1.446  | 0.0364 | 0.1427 | 0.0013 | 1028 | 36  | 908  | 15 | 860  | 8  | 105.6 | 860        | 8  |
| 48 | 0.69 | 0.0579 | 0.0013 | 0.4098 | 0.0084 | 0.0514 | 0.0004 | 524  | 49  | 349  | 6  | 323  | 2  | 108.0 | 323        | 2  |
| 49 | 0.31 | 0.0847 | 0.0017 | 2.421  | 0.0439 | 0.2074 | 0.0017 | 1308 | 39  | 1249 | 13 | 1215 | 9  | 107.7 | 1308       | 39 |
| 50 | 0.60 | 0.0680 | 0.0006 | 1.117  | 0.0072 | 0.1192 | 0.0008 | 868  | 6   | 761  | 3  | 726  | 5  | 104.8 | 726        | 5  |
| 51 | 2.01 | 0.0708 | 0.0014 | 1.173  | 0.0222 | 0.1202 | 0.0009 | 952  | 26  | 788  | 10 | 732  | 5  | 107.7 | 732        | 5  |
| 52 | 0.94 | 0.0765 | 0.0007 | 1.913  | 0.0142 | 0.1816 | 0.0013 | 1107 | 7   | 1086 | 5  | 1076 | 7  | 102.9 | 1107       | 7  |
| 53 | 0.25 | 0.0697 | 0.0008 | 1.387  | 0.0127 | 0.1443 | 0.0010 | 919  | 24  | 883  | 5  | 869  | 5  | 101.6 | 869        | 5  |
| 54 | 0.65 | 0.0678 | 0.0008 | 1.238  | 0.0136 | 0.1324 | 0.0009 | 862  | 12  | 818  | 6  | 802  | 5  | 102.0 | 802        | 5  |
| 55 | 0.27 | 0.0648 | 0.0009 | 0.9494 | 0.0109 | 0.1062 | 0.0007 | 769  | 29  | 678  | 6  | 651  | 4  | 104.1 | 651        | 4  |
| 56 | 0.54 | 0.0739 | 0.0007 | 1.531  | 0.0116 | 0.1504 | 0.0010 | 1037 | 7   | 943  | 5  | 903  | 6  | 104.4 | 903        | 6  |
| 57 | 0.33 | 0.0694 | 0.0006 | 1.432  | 0.0095 | 0.1497 | 0.0010 | 911  | 6   | 903  | 4  | 899  | 6  | 100.4 | 899        | 6  |
| 58 | 0.50 | 0.0676 | 0.0009 | 1.127  | 0.0143 | 0.1211 | 0.0009 | 855  | 14  | 766  | 7  | 737  | 5  | 103.9 | 737        | 5  |
| 59 | 0.46 | 0.0560 | 0.0007 | 0.5225 | 0.0060 | 0.0677 | 0.0005 | 452  | 14  | 427  | 4  | 422  | 3  | 101.2 | 422        | 3  |
| 60 | 0.27 | 0.0578 | 0.0009 | 0.5311 | 0.0078 | 0.0667 | 0.0005 | 520  | 20  | 433  | 5  | 416  | 3  | 104.1 | 416        | 3  |
| 61 | 0.12 | 0.0808 | 0.0009 | 2.156  | 0.0180 | 0.1936 | 0.0013 | 1216 | 22  | 1167 | 6  | 1141 | 7  | 106.6 | 1216       | 22 |
| 62 | 0.44 | 0.0652 | 0.0016 | 1.016  | 0.0228 | 0.1130 | 0.0009 | 781  | 51  | 712  | 12 | 690  | 5  | 103.2 | 690        | 5  |
| 63 | 0.63 | 0.0632 | 0.0017 | 1.052  | 0.0274 | 0.1208 | 0.0009 | 715  | 59  | 730  | 14 | 735  | 5  | 99.3  | 735        | 5  |
| 64 | 0.21 | 0.0709 | 0.0008 | 1.331  | 0.0110 | 0.1362 | 0.0009 | 955  | 22  | 859  | 5  | 823  | 5  | 104.4 | 823        | 5  |
| 65 | 0.36 | 0.0708 | 0.0014 | 1.509  | 0.0269 | 0.1547 | 0.0012 | 950  | 40  | 934  | 11 | 927  | 6  | 100.8 | 927        | 6  |
| 66 | 0.42 | 0.1328 | 0.0021 | 5.309  | 0.0702 | 0.2899 | 0.0024 | 2136 | 28  | 1870 | 11 | 1641 | 12 | 130.2 | Discordant |    |
| 67 | 0.59 | 0.0639 | 0.0019 | 0.6128 | 0.0181 | 0.0696 | 0.0006 | 738  | 48  | 485  | 11 | 434  | 4  | 111.8 | Discordant |    |
| 68 | 0.46 | 0.0565 | 0.0006 | 0.5570 | 0.0053 | 0.0715 | 0.0005 | 473  | 10  | 450  | 3  | 445  | 3  | 101.1 | 445        | 3  |
| 69 | 0.66 | 0.0993 | 0.0009 | 3.374  | 0.0257 | 0.2464 | 0.0017 | 1612 | 6   | 1498 | 6  | 1420 | 9  | 113.5 | Discordant |    |
| 70 | 0.64 | 0.0666 | 0.0017 | 1.154  | 0.0271 | 0.1256 | 0.0010 | 826  | 53  | 779  | 13 | 763  | 6  | 102.1 | 763        | 6  |
| 71 | 0.89 | 0.0965 | 0.0022 | 3.598  | 0.0772 | 0.2706 | 0.0022 | 1557 | 44  | 1549 | 17 | 1544 | 11 | 100.8 | 1557       | 44 |
| 72 | 0.43 | 0.0914 | 0.0011 | 3.187  | 0.0349 | 0.2530 | 0.0019 | 1454 | 10  | 1454 | 8  | 1454 | 10 | 100.0 | 1454       | 10 |
| 73 | 0.45 | 0.0631 | 0.0008 | 0.6610 | 0.0072 | 0.0760 | 0.0005 | 711  | 12  | 515  | 4  | 472  | 3  | 109.1 | 472        | 3  |
| 74 | 0.45 | 0.1226 | 0.0016 | 5.236  |        |        |        |      |     |      |    |      |    |       |            |    |



|                                                                                                          |      |        |        |        |        |        |        |      |     |      |    |      |    |       |      |    |
|----------------------------------------------------------------------------------------------------------|------|--------|--------|--------|--------|--------|--------|------|-----|------|----|------|----|-------|------|----|
| 111                                                                                                      | 0.50 | 0.0745 | 0.0018 | 1.853  | 0.0423 | 0.1804 | 0.0015 | 1055 | 50  | 1064 | 15 | 1069 | 8  | 98.7  | 1055 | 50 |
| 112                                                                                                      | 0.28 | 0.0688 | 0.0011 | 1.158  | 0.0160 | 0.1221 | 0.0009 | 892  | 33  | 781  | 8  | 743  | 5  | 105.1 | 743  | 5  |
| 113                                                                                                      | 0.74 | 0.0560 | 0.0007 | 0.5359 | 0.0060 | 0.0695 | 0.0005 | 450  | 13  | 436  | 4  | 433  | 3  | 100.7 | 433  | 3  |
| 114                                                                                                      | 0.56 | 0.1021 | 0.0036 | 3.862  | 0.1289 | 0.2743 | 0.0031 | 1663 | 67  | 1606 | 27 | 1562 | 15 | 106.5 | 1663 | 67 |
| 115                                                                                                      | 1.18 | 0.1630 | 0.0016 | 10.583 | 0.0887 | 0.4712 | 0.0035 | 2487 | 6   | 2487 | 8  | 2489 | 15 | 99.9  | 2487 | 6  |
| 116                                                                                                      | 0.44 | 0.0754 | 0.0019 | 1.815  | 0.0437 | 0.1746 | 0.0015 | 1079 | 53  | 1051 | 16 | 1037 | 8  | 104.1 | 1079 | 53 |
| 117                                                                                                      | 0.29 | 0.0717 | 0.0010 | 1.541  | 0.0189 | 0.1559 | 0.0011 | 977  | 29  | 947  | 8  | 934  | 6  | 101.4 | 934  | 6  |
| Sample TK097-1, mica quartzite, Kekesu valley, Akeyazi HP-LT belt, (Xia et al., 2014, Gondwana Research) |      |        |        |        |        |        |        |      |     |      |    |      |    |       |      |    |
| 1                                                                                                        | 0.78 | 0.0596 | 0.0016 | 0.4998 | 0.0127 | 0.0608 | 0.0005 | 590  | 40  | 412  | 9  | 381  | 3  | 108.1 | 381  | 3  |
| 2                                                                                                        | 0.56 | 0.0559 | 0.0013 | 0.5435 | 0.0120 | 0.0706 | 0.0006 | 446  | 34  | 441  | 8  | 440  | 4  | 100.2 | 440  | 4  |
| 3                                                                                                        | 0.57 | 0.0552 | 0.0011 | 0.5114 | 0.0100 | 0.0672 | 0.0005 | 420  | 29  | 419  | 7  | 419  | 3  | 100.0 | 419  | 3  |
| 4                                                                                                        | 0.55 | 0.0551 | 0.0007 | 0.5014 | 0.0061 | 0.0661 | 0.0005 | 415  | 14  | 413  | 4  | 412  | 3  | 100.2 | 412  | 3  |
| 5                                                                                                        | 0.73 | 0.0563 | 0.0014 | 0.5586 | 0.0138 | 0.0720 | 0.0006 | 465  | 39  | 451  | 9  | 448  | 4  | 100.7 | 448  | 4  |
| 6                                                                                                        | 0.64 | 0.0565 | 0.0016 | 0.5503 | 0.0155 | 0.0706 | 0.0006 | 473  | 48  | 445  | 10 | 440  | 4  | 101.1 | 440  | 4  |
| 7                                                                                                        | 0.57 | 0.0561 | 0.0019 | 0.5658 | 0.0191 | 0.0731 | 0.0007 | 458  | 58  | 455  | 12 | 455  | 4  | 100.0 | 455  | 4  |
| 8                                                                                                        | 0.72 | 0.0556 | 0.0010 | 0.4824 | 0.0078 | 0.0630 | 0.0005 | 434  | 23  | 400  | 5  | 394  | 3  | 101.5 | 394  | 3  |
| 9                                                                                                        | 0.58 | 0.0583 | 0.0005 | 0.5138 | 0.0038 | 0.0640 | 0.0005 | 541  | 7   | 421  | 3  | 400  | 3  | 105.3 | 400  | 3  |
| 10                                                                                                       | 0.53 | 0.0551 | 0.0011 | 0.5057 | 0.0094 | 0.0666 | 0.0005 | 415  | 27  | 416  | 6  | 416  | 3  | 100.0 | 416  | 3  |
| 11                                                                                                       | 0.45 | 0.0573 | 0.0016 | 0.4722 | 0.0130 | 0.0598 | 0.0005 | 502  | 45  | 393  | 9  | 374  | 3  | 105.1 | 374  | 3  |
| 12                                                                                                       | 0.61 | 0.0549 | 0.0014 | 0.4943 | 0.0118 | 0.0653 | 0.0005 | 409  | 38  | 408  | 8  | 408  | 3  | 100.0 | 408  | 3  |
| 13                                                                                                       | 0.86 | 0.0559 | 0.0014 | 0.5451 | 0.0131 | 0.0708 | 0.0007 | 448  | 37  | 442  | 9  | 441  | 4  | 100.2 | 441  | 4  |
| 14                                                                                                       | 0.49 | 0.0575 | 0.0009 | 0.5107 | 0.0073 | 0.0645 | 0.0005 | 510  | 18  | 419  | 5  | 403  | 3  | 104.0 | 403  | 3  |
| 15                                                                                                       | 0.81 | 0.0585 | 0.0016 | 0.5311 | 0.0144 | 0.0659 | 0.0006 | 547  | 44  | 433  | 10 | 411  | 4  | 105.4 | 411  | 4  |
| 16                                                                                                       | 0.46 | 0.0547 | 0.0005 | 0.5290 | 0.0042 | 0.0702 | 0.0005 | 399  | 8   | 431  | 3  | 437  | 3  | 98.6  | 437  | 3  |
| 17                                                                                                       | 0.38 | 0.0571 | 0.0012 | 0.5615 | 0.0112 | 0.0714 | 0.0006 | 495  | 30  | 453  | 7  | 444  | 3  | 102.0 | 444  | 3  |
| 18                                                                                                       | 0.55 | 0.0561 | 0.0023 | 0.5681 | 0.0226 | 0.0735 | 0.0007 | 456  | 71  | 457  | 15 | 457  | 4  | 100.0 | 457  | 4  |
| 019a                                                                                                     | 0.60 | 0.0555 | 0.0009 | 0.5241 | 0.0084 | 0.0685 | 0.0005 | 432  | 22  | 428  | 6  | 427  | 3  | 100.2 | 427  | 3  |
| 019b                                                                                                     | 0.45 | 0.0553 | 0.0026 | 0.5225 | 0.0243 | 0.0685 | 0.0008 | 426  | 84  | 427  | 16 | 427  | 5  | 100.0 | 427  | 5  |
| 20                                                                                                       | 0.48 | 0.0554 | 0.0011 | 0.5258 | 0.0096 | 0.0688 | 0.0006 | 430  | 26  | 429  | 6  | 429  | 3  | 100.0 | 429  | 3  |
| 21                                                                                                       | 0.52 | 0.0554 | 0.0016 | 0.4681 | 0.0132 | 0.0613 | 0.0005 | 427  | 67  | 390  | 9  | 384  | 3  | 101.6 | 384  | 3  |
| 22                                                                                                       | 0.26 | 0.0542 | 0.0005 | 0.3916 | 0.0032 | 0.0524 | 0.0004 | 381  | 8   | 336  | 2  | 329  | 2  | 102.1 | 329  | 2  |
| 23                                                                                                       | 0.55 | 0.0559 | 0.0008 | 0.5108 | 0.0071 | 0.0663 | 0.0005 | 448  | 18  | 419  | 5  | 414  | 3  | 101.2 | 414  | 3  |
| 24                                                                                                       | 0.75 | 0.0554 | 0.0032 | 0.5047 | 0.0290 | 0.0661 | 0.0007 | 427  | 134 | 415  | 20 | 413  | 4  | 100.5 | 413  | 4  |
| 25                                                                                                       | 0.51 | 0.0559 | 0.0015 | 0.5340 | 0.0140 | 0.0693 | 0.0006 | 448  | 44  | 434  | 9  | 432  | 3  | 100.5 | 432  | 3  |
| 26                                                                                                       | 0.64 | 0.0544 | 0.0017 | 0.4718 | 0.0144 | 0.0629 | 0.0005 | 388  | 72  | 392  | 10 | 393  | 3  | 99.7  | 393  | 3  |
| 27                                                                                                       | 0.71 | 0.0600 | 0.0013 | 0.5495 | 0.0110 | 0.0665 | 0.0005 | 603  | 29  | 445  | 7  | 415  | 3  | 107.2 | 415  | 3  |
| 28                                                                                                       | 0.56 | 0.0557 | 0.0013 | 0.5446 | 0.0124 | 0.0709 | 0.0006 | 441  | 36  | 441  | 8  | 442  | 3  | 99.8  | 442  | 3  |
| 29                                                                                                       | 0.95 | 0.0551 | 0.0022 | 0.5057 | 0.0197 | 0.0666 | 0.0007 | 415  | 70  | 416  | 13 | 416  | 4  | 100.0 | 416  | 4  |
| 30                                                                                                       | 0.45 | 0.0560 | 0.0006 | 0.4753 | 0.0041 | 0.0616 | 0.0004 | 451  | 9   | 395  | 3  | 385  | 3  | 102.6 | 385  | 3  |
| 31                                                                                                       | 0.39 | 0.0566 | 0.0011 | 0.4248 | 0.0076 | 0.0544 | 0.0004 | 476  | 26  | 359  | 5  | 342  | 3  | 105.0 | 342  | 3  |
| 32                                                                                                       | 0.71 | 0.0564 | 0.0019 | 0.5626 | 0.0185 | 0.0723 | 0.0007 | 469  | 56  | 453  | 12 | 450  | 4  | 100.7 | 450  | 4  |
| 33                                                                                                       | 0.97 | 0.0548 | 0.0008 | 0.4793 | 0.0069 | 0.0634 | 0.0005 | 406  | 19  | 398  | 5  | 396  | 3  | 100.5 | 396  | 3  |
| 34                                                                                                       | 0.50 | 0.0579 | 0.0015 | 0.5795 | 0.0144 | 0.0727 | 0.0006 | 524  | 40  | 464  | 9  | 452  | 4  | 102.7 | 452  | 4  |
| 35                                                                                                       | 0.72 | 0.0553 | 0.0011 | 0.5124 | 0.0097 | 0.0672 | 0.0005 | 426  | 28  | 420  | 7  | 419  | 3  | 100.2 | 419  | 3  |
| 36                                                                                                       | 0.68 | 0.0554 | 0.0023 | 0.5236 | 0.0211 | 0.0686 | 0.0006 | 428  | 73  | 428  | 14 | 428  | 4  | 100.0 | 428  | 4  |
| 37                                                                                                       | 0.40 | 0.0562 | 0.0007 | 0.5738 | 0.0060 | 0.0741 | 0.0006 | 460  | 11  | 460  | 4  | 461  | 3  | 99.8  | 461  | 3  |
| 38                                                                                                       | 0.75 | 0.0557 | 0.0009 | 0.5102 | 0.0077 | 0.0665 | 0.0005 | 439  | 20  | 419  | 5  | 415  | 3  | 101.0 | 415  | 3  |
| 39                                                                                                       | 0.67 | 0.0560 | 0.0012 | 0.5554 | 0.0118 | 0.0720 | 0.0006 | 452  | 32  | 449  | 8  | 448  | 4  | 100.2 | 448  | 4  |
| 40                                                                                                       | 0.69 | 0.0604 | 0.0011 | 0.5606 | 0.0097 | 0.0674 | 0.0005 | 617  | 24  | 452  | 6  | 420  | 3  | 107.6 | 420  | 3  |
| 41                                                                                                       | 0.76 | 0.0548 | 0.0010 | 0.4895 | 0.0081 | 0.0648 | 0.0005 | 405  | 23  | 405  | 6  | 405  | 3  | 100.0 | 405  | 3  |
| 42                                                                                                       | 0.82 | 0.0553 | 0.0024 | 0.5189 | 0.0223 | 0.0681 | 0.0007 | 425  | 79  | 424  | 15 | 424  | 4  | 100.0 | 424  | 4  |
| 43                                                                                                       | 0.74 | 0.0552 | 0.0007 | 0.4923 | 0.0056 | 0.0647 | 0.0005 | 419  | 13  | 406  | 4  | 404  | 3  | 100.5 | 404  | 3  |
| 44                                                                                                       | 0.81 | 0.0552 | 0.0009 | 0.5148 | 0.0082 | 0.0676 | 0.0005 | 421  | 22  | 422  | 6  | 422  | 3  | 100.0 | 422  | 3  |
| 45                                                                                                       | 0.91 | 0.0551 | 0.0013 | 0.5097 | 0.0115 | 0.0671 | 0.0006 | 416  | 36  | 418  | 8  | 419  | 3  | 99.8  | 419  | 3  |
| 46                                                                                                       | 0.80 | 0.0550 | 0.0008 | 0.5065 | 0.0069 | 0.0668 | 0.0005 | 414  | 17  | 416  | 5  | 417  | 3  | 99.8  | 417  | 3  |
| 47                                                                                                       | 0.73 | 0.0553 | 0.0008 | 0.5214 | 0.0068 | 0.0684 | 0.0005 | 426  | 16  | 426  | 5  | 426  | 3  | 100.0 | 426  | 3  |
| 48                                                                                                       | 0.82 | 0.0550 | 0.0012 | 0.5020 | 0.0106 | 0.0663 | 0.0005 | 411  | 33  | 413  | 7  | 414  | 3  | 99.8  | 414  | 3  |
| 49                                                                                                       | 0.62 | 0.0552 | 0.0009 | 0.4391 | 0.0064 | 0.0577 | 0.0005 | 422  | 19  | 370  | 5  | 362  | 3  | 102.2 | 362  | 3  |
| 50                                                                                                       | 0.66 | 0.0576 | 0.0012 | 0.5032 | 0.0098 | 0.0634 | 0.0005 | 514  | 29  | 414  | 7  | 396  | 3  | 104.5 | 396  | 3  |
| 51                                                                                                       | 0.63 | 0.0562 | 0.0009 | 0.4639 | 0.0068 | 0.0599 | 0.0005 | 461  | 19  | 387  | 5  | 375  | 3  | 103.2 | 375  | 3  |
| 52                                                                                                       | 0.65 | 0.0578 | 0.0021 | 0.5137 | 0.0183 | 0.0645 | 0.0006 | 522  | 82  | 421  | 12 | 403  | 3  | 104.5 | 403  | 3  |
| 53                                                                                                       | 0.79 | 0.0550 | 0.0011 | 0.4942 | 0.0097 | 0.0652 | 0.0005 | 411  | 30  | 408  | 7  | 407  | 3  | 100.2 | 407  | 3  |
| 54                                                                                                       | 0.42 | 0.0559 | 0.0006 | 0.4748 | 0.0046 | 0.0616 | 0.0004 | 448  | 10  | 395  | 3  | 385  | 3  | 102.6 | 385  | 3  |
| 55                                                                                                       | 0.49 | 0.0549 | 0.0006 | 0.4938 | 0.0047 | 0.0653 | 0.0005 | 408  | 10  | 408  | 3  | 408  | 3  | 100.0 | 408  | 3  |
| 56                                                                                                       | 0.64 | 0.0557 | 0.0007 | 0.5431 | 0.0065 | 0.0707 | 0.0005 | 441  | 14  | 440  | 4  | 440  | 3  | 100.0 | 440  | 3  |
| 57                                                                                                       | 0.68 | 0.0557 | 0.0010 | 0.4916 | 0.0087 | 0.0640 | 0.0005 | 441  | 25  | 406  | 6  | 400  | 3  | 101.5 | 400  | 3  |
| 58                                                                                                       | 0.48 | 0.0549 | 0.0010 | 0.4618 | 0.0079 | 0.0611 | 0.0005 | 407  | 24  | 386  | 5  | 382  | 3  | 101.0 | 382  | 3  |
| 59                                                                                                       | 0.54 | 0.0554 | 0.0006 | 0.5250 | 0.0046 | 0.0688 | 0.0005 | 428  | 9   | 428  | 3  | 429  | 3  | 99.8  | 429  | 3  |
| 60                                                                                                       | 0.52 | 0.0555 | 0.0013 | 0.5284 | 0.0119 | 0.0691 | 0.0006 | 430  | 36  | 431  | 8  | 431  | 3  | 100.0 | 431  | 3  |
| 61                                                                                                       | 0.42 | 0.0555 | 0.0007 | 0.5278 | 0.0060 | 0.0690 | 0.0005 | 431  | 13  | 430  | 4  | 430  | 3  | 100.0 | 430  | 3  |
| 62                                                                                                       | 0.27 | 0.0544 | 0.0008 | 0.4669 | 0.0063 | 0.0622 | 0.0005 | 388  | 17  | 389  | 4  | 389  | 3  | 100.0 | 389  | 3  |
| 63                                                                                                       | 0.79 | 0.0554 | 0.0009 | 0.5197 | 0.0075 | 0.0680 | 0.0005 | 429  | 19  | 425  | 5  | 424  | 3  | 100.2 | 424  | 3  |
| 64                                                                                                       | 0.65 | 0.0555 | 0.0011 | 0.5351 | 0.0103 | 0.0700 | 0.0006 | 432  | 28  | 435  | 7  | 436  | 3  | 99.8  | 436  | 3  |
| 65                                                                                                       | 0.63 | 0.0568 | 0.0012 | 0.6038 | 0.0120 | 0.0771 | 0.0006 | 483  | 29  | 480  | 8  | 479  | 4  | 100.2 | 479  | 4  |
| 66                                                                                                       | 0.57 | 0.0549 | 0.0010 | 0.4976 | 0.0085 | 0.0658 | 0.0005 | 409  | 24  | 410  | 6  | 410  | 3  | 100.0 | 410  | 3  |
| 67                                                                                                       | 0.52 | 0.0560 | 0.0018 | 0.5645 | 0.0177 | 0.0731 | 0.0007 | 453  | 53  | 454  | 11 | 455  | 4  | 99.8  | 455  | 4  |
| 68                                                                                                       | 0.55 | 0.0598 | 0.0020 | 0.5402 | 0.0177 | 0.0656 | 0.0005 | 596  | 75  | 439  | 12 | 409  | 3  | 107.3 | 409  | 3  |
| 69                                                                                                       | 0.54 | 0.0555 | 0.0007 | 0.5357 | 0.0058 | 0.0700 | 0.0005 | 434  | 12  | 436  | 4  | 436  | 3  | 100.0 | 436  | 3  |
| 70                                                                                                       | 0.41 | 0.0609 | 0.0012 | 0.8056 | 0.0154 | 0.0960 | 0.0008 | 635  | 27  | 600  | 9  | 591  | 5  | 101.5 | 591  | 5  |
| 71                                                                                                       | 0.69 | 0.0553 | 0.0009 | 0.5260 | 0.0077 | 0.0690 | 0.0005 | 426  | 19  | 429  | 5  | 430  | 3  | 99.8  | 430  | 3  |
| 72                                                                                                       | 0.57 |        |        |        |        |        |        |      |     |      |    |      |    |       |      |    |

|                                                                                                                                         |      |        |        |        |        |        |        |        |        |      |    |      |    |       |      |       |            |    |
|-----------------------------------------------------------------------------------------------------------------------------------------|------|--------|--------|--------|--------|--------|--------|--------|--------|------|----|------|----|-------|------|-------|------------|----|
| 110                                                                                                                                     | 0.70 | 0.0551 | 0.0016 | 0.5062 | 0.0144 | 0.0666 | 0.0006 | 416    | 48     | 416  | 10 | 416  | 3  | 100.0 | 416  | 3     |            |    |
| 111                                                                                                                                     | 0.72 | 0.0545 | 0.0009 | 0.4722 | 0.0069 | 0.0628 | 0.0005 | 393    | 19     | 393  | 5  | 393  | 3  | 100.0 | 393  | 3     |            |    |
| Sample K931, coesite-bearing metapelite, Kebuerte River, Akeyazi HP-LT belt, (Yang et al., 2013, Journal of Asian Earth Sciences)       |      |        |        |        |        |        |        |        |        |      |    |      |    |       |      |       |            |    |
| K931-1.1                                                                                                                                | 2    | 133    | 0.02   | 0.2050 | 0.0697 | 0.0510 | 0.0010 |        |        |      |    | 319  | 6  |       | 319  | 6     |            |    |
| K931-1.2                                                                                                                                | 65   | 270    | 0.25   | 7.486  | 0.0973 | 0.3890 | 0.0047 |        |        |      |    | 2118 | 22 |       | 2118 | 22    |            |    |
| K931-2.1                                                                                                                                | 4    | 356    | 0.01   | 0.3750 | 0.0173 | 0.0510 | 0.0007 |        |        |      |    | 321  | 4  |       | 321  | 4     |            |    |
| K931-2.2                                                                                                                                | 79   | 1228   | 0.07   | 1.806  | 0.0253 | 0.1560 | 0.0017 |        |        |      |    | 933  | 10 |       | 933  | 10    |            |    |
| K931-4.1                                                                                                                                | 159  | 152    | 1.08   | 9.010  | 0.1712 | 0.3880 | 0.0066 |        |        |      |    | 2115 | 31 |       | 2115 | 31    |            |    |
| K931-5.1                                                                                                                                | 29   | 360    | 0.08   | 0.3410 | 0.0191 | 0.0500 | 0.0007 |        |        |      |    | 314  | 4  |       | 314  | 4     |            |    |
| K931-7.1                                                                                                                                | 82   | 363    | 0.23   | 1.224  | 0.0245 | 0.1320 | 0.0016 |        |        |      |    | 802  | 9  |       | 802  | 9     |            |    |
| K931-11.1                                                                                                                               | 7    | 173    | 0.04   | 0.4110 | 0.0575 | 0.0500 | 0.0012 |        |        |      |    | 314  | 7  |       | 314  | 7     |            |    |
| K931-12.1                                                                                                                               | 6    | 730    | 0.01   | 0.3710 | 0.0085 | 0.0510 | 0.0006 |        |        |      |    | 322  | 4  |       | 322  | 4     |            |    |
| K931-14.1                                                                                                                               | 21   | 377    | 0.06   | 0.3360 | 0.0185 | 0.0500 | 0.0007 |        |        |      |    | 312  | 4  |       | 312  | 4     |            |    |
| K931-15.1                                                                                                                               | 257  | 486    | 0.55   | 0.5840 | 0.0128 | 0.0760 | 0.0009 |        |        |      |    | 472  | 5  |       | 472  | 5     |            |    |
| K931-17.1                                                                                                                               | 12   | 328    | 0.04   | 19.100 | 0.2483 | 0.5730 | 0.0069 |        |        |      |    | 2919 | 28 |       | 2919 | 28    |            |    |
| K931-18.1                                                                                                                               | 202  | 212    | 0.98   | 1.149  | 0.0276 | 0.1280 | 0.0023 |        |        |      |    | 777  | 13 |       | 777  | 13    |            |    |
| K931-19.2                                                                                                                               | 116  | 516    | 0.23   | 0.7340 | 0.0132 | 0.0870 | 0.0011 |        |        |      |    | 535  | 6  |       | 535  | 6     |            |    |
| K931-20.1                                                                                                                               | 0    | 67     | 0.00   | 0.3550 | 0.0746 | 0.0520 | 0.0014 |        |        |      |    | 327  | 8  |       | 327  | 8     |            |    |
| K931-20.2                                                                                                                               | 82   | 418    | 0.20   | 2.256  | 0.0338 | 0.1580 | 0.0019 |        |        |      |    | 946  | 10 |       | 946  | 10    |            |    |
| K931-21.1                                                                                                                               | 1    | 226    | 0.00   | 0.3770 | 0.0128 | 0.0530 | 0.0007 |        |        |      |    | 330  | 4  |       | 330  | 4     |            |    |
| K931-21.2                                                                                                                               | 190  | 549    | 0.36   | 9.390  | 0.1315 | 0.4150 | 0.0046 |        |        |      |    | 2236 | 21 |       | 2236 | 21    |            |    |
| K931-22.1                                                                                                                               | 12   | 619    | 0.02   | 0.3510 | 0.0119 | 0.0510 | 0.0006 |        |        |      |    | 323  | 4  |       | 323  | 4     |            |    |
| K931-24.2                                                                                                                               | 78   | 444    | 0.18   | 1.204  | 0.0265 | 0.1040 | 0.0017 |        |        |      |    | 637  | 10 |       | 637  | 10    |            |    |
| K931-25.1                                                                                                                               | 4    | 167    | 0.02   | 0.3700 | 0.0444 | 0.0510 | 0.0010 |        |        |      |    | 322  | 6  |       | 322  | 6     |            |    |
| K931-26.1                                                                                                                               | 127  | 272    | 0.48   | 7.300  | 0.1533 | 0.3340 | 0.0060 |        |        |      |    | 1856 | 28 |       | 1856 | 28    |            |    |
| K931-29.1                                                                                                                               | 14   | 362    | 0.04   | 0.3400 | 0.0211 | 0.0500 | 0.0007 |        |        |      |    | 314  | 4  |       | 314  | 4     |            |    |
| K931-30.2                                                                                                                               | 68   | 192    | 0.37   | 1.306  | 0.0379 | 0.1340 | 0.0017 |        |        |      |    | 810  | 10 |       | 810  | 10    |            |    |
| K931-31.1                                                                                                                               | 342  | 814    | 0.43   | 0.5390 | 0.0086 | 0.0690 | 0.0008 |        |        |      |    | 428  | 5  |       | 428  | 5     |            |    |
| K931-32.1                                                                                                                               | 12   | 63     | 0.20   | 3.870  | 0.1084 | 0.1940 | 0.0047 |        |        |      |    | 1145 | 25 |       | 1145 | 25    |            |    |
| K931-33.2                                                                                                                               | 91   | 362    | 0.26   | 1.163  | 0.0233 | 0.1240 | 0.0015 |        |        |      |    | 753  | 9  |       | 753  | 9     |            |    |
| K931-35.1                                                                                                                               | 1    | 232    | 0.00   | 0.3630 | 0.0254 | 0.0500 | 0.0007 |        |        |      |    | 317  | 4  |       | 317  | 4     |            |    |
| K931-36.2                                                                                                                               | 130  | 644    | 0.21   | 0.3980 | 0.0111 | 0.0540 | 0.0008 |        |        |      |    | 339  | 5  |       | 339  | 5     |            |    |
| K931-37.1                                                                                                                               | 43   | 93     | 0.48   | 0.4800 | 0.0912 | 0.0650 | 0.0014 |        |        |      |    | 405  | 8  |       | 405  | 8     |            |    |
| K931-38.1                                                                                                                               | 6    | 320    | 0.02   | 0.3840 | 0.0227 | 0.0530 | 0.0007 |        |        |      |    | 330  | 4  |       | 330  | 4     |            |    |
| K931-40.1                                                                                                                               | 31   | 789    | 0.04   | 11.170 | 0.1340 | 0.5090 | 0.0056 |        |        |      |    | 2653 | 25 |       | 2653 | 25    |            |    |
| Sample KG25, metagreywacke, Kembel River of north Atbashi Range, Atbashi HP-LT belt, (Hegner et al., 2010, American Journal of Science) |      |        |        |        |        |        |        |        |        |      |    |      |    |       |      |       |            |    |
| 1                                                                                                                                       | 338  | 115    | 2.94   | 0.1667 | 0.0015 | 11.060 | 0.0020 | 0.4814 | 0.0068 | 2525 | 15 | 2528 | 16 | 2533  | 30   | 99.7  | 2525       | 15 |
| 2                                                                                                                                       | 371  | 958    | 0.40   | 0.1669 | 0.0004 | 10.990 | 0.0015 | 0.4776 | 0.0063 | 2527 | 4  | 2522 | 13 | 2517  | 27   | 100.4 | 2527       | 4  |
| 3                                                                                                                                       | 325  | 592    | 0.55   | 0.0940 | 0.0006 | 3.404  | 0.0053 | 0.2625 | 0.0035 | 1509 | 13 | 1505 | 12 | 1503  | 18   | 100.4 | 1509       | 13 |
| 4                                                                                                                                       | 102  | 211    | 0.48   | 0.0733 | 0.0014 | 1.717  | 0.0043 | 0.1699 | 0.0023 | 1022 | 38 | 1015 | 16 | 1012  | 13   | 101.0 | 1022       | 38 |
| 5                                                                                                                                       | 61   | 160    | 0.38   | 0.0664 | 0.0024 | 1.257  | 0.0051 | 0.1374 | 0.0019 | 818  | 77 | 826  | 23 | 830   | 11   | 99.5  | 830        | 11 |
| 6                                                                                                                                       | 298  | 356    | 0.84   | 0.0740 | 0.0011 | 1.766  | 0.0037 | 0.1731 | 0.0023 | 1042 | 30 | 1033 | 14 | 1029  | 13   | 101.3 | 1042       | 30 |
| 7                                                                                                                                       | 46   | 388    | 0.12   | 0.0829 | 0.0008 | 2.480  | 0.0044 | 0.2169 | 0.0029 | 1268 | 20 | 1266 | 13 | 1265  | 15   | 100.2 | 1268       | 20 |
| 8                                                                                                                                       | 15   | 182    | 0.08   | 0.0708 | 0.0023 | 1.568  | 0.0058 | 0.1608 | 0.0022 | 950  | 67 | 958  | 23 | 961   | 12   | 99.7  | 961        | 12 |
| 9                                                                                                                                       | 148  | 181    | 0.82   | 0.0583 | 0.0016 | 0.5580 | 0.0017 | 0.0694 | 0.0014 | 542  | 61 | 450  | 11 | 433   | 9    | 103.9 | 433        | 9  |
| 10                                                                                                                                      | 57   | 148    | 0.39   | 0.0667 | 0.0019 | 1.120  | 0.0035 | 0.1217 | 0.0029 | 830  | 61 | 763  | 17 | 741   | 17   | 103.0 | 741        | 17 |
| 11                                                                                                                                      | 381  | 526    | 0.72   | 0.0936 | 0.0015 | 3.211  | 0.0067 | 0.2487 | 0.0042 | 1501 | 30 | 1460 | 16 | 1432  | 22   | 104.8 | 1501       | 30 |
| 12                                                                                                                                      | 155  | 439    | 0.35   | 0.1127 | 0.0030 | 4.900  | 0.0014 | 0.3155 | 0.0083 | 1844 | 49 | 1803 | 25 | 1768  | 41   | 104.3 | 1844       | 49 |
| 13                                                                                                                                      | 159  | 275    | 0.58   | 0.1800 | 0.0033 | 9.770  | 0.0022 | 0.3937 | 0.0062 | 2653 | 31 | 2414 | 21 | 2140  | 29   | 124.0 | Discordant |    |
| 14                                                                                                                                      | 60   | 157    | 0.38   | 0.0809 | 0.0012 | 2.084  | 0.0043 | 0.1869 | 0.0027 | 1218 | 30 | 1144 | 14 | 1105  | 15   | 110.2 | Discordant |    |
| 15                                                                                                                                      | 11   | 161    | 0.07   | 0.1937 | 0.0019 | 13.940 | 0.0029 | 0.5219 | 0.0087 | 2774 | 16 | 2745 | 20 | 2707  | 37   | 102.5 | 2774       | 16 |
| 16                                                                                                                                      | 168  | 291    | 0.58   | 0.0715 | 0.0014 | 1.621  | 0.0038 | 0.1644 | 0.0033 | 972  | 41 | 978  | 15 | 981   | 18   | 99.7  | 981        | 18 |
| 17                                                                                                                                      | 390  | 530    | 0.74   | 0.0577 | 0.0009 | 0.5690 | 0.0013 | 0.0714 | 0.0012 | 519  | 35 | 457  | 9  | 445   | 7    | 102.7 | 445        | 7  |
| 18                                                                                                                                      | 66   | 512    | 0.13   | 0.1606 | 0.0017 | 8.730  | 0.0017 | 0.3943 | 0.0060 | 2462 | 18 | 2311 | 18 | 2143  | 28   | 114.9 | Discordant |    |
| 19                                                                                                                                      | 73   | 608    | 0.12   | 0.1720 | 0.0064 | 10.110 | 0.0038 | 0.4260 | 0.0014 | 2577 | 64 | 2445 | 36 | 2289  | 62   | 112.6 | Discordant |    |
| 20                                                                                                                                      | 112  | 384    | 0.29   | 0.0890 | 0.0018 | 2.155  | 0.0054 | 0.1756 | 0.0027 | 1405 | 39 | 1167 | 17 | 1043  | 15   | 134.7 | Discordant |    |
| 21                                                                                                                                      | 163  | 278    | 0.59   | 0.0929 | 0.0011 | 2.947  | 0.0058 | 0.2301 | 0.0033 | 1486 | 23 | 1394 | 15 | 1335  | 17   | 111.3 | Discordant |    |
| 22                                                                                                                                      | 201  | 223    | 0.90   | 0.0671 | 0.0016 | 0.6380 | 0.0018 | 0.0689 | 0.0012 | 841  | 50 | 501  | 11 | 429   | 7    | 116.8 | Discordant |    |
| 23                                                                                                                                      | 123  | 270    | 0.46   | 0.0983 | 0.0013 | 3.514  | 0.0084 | 0.2593 | 0.0052 | 1591 | 25 | 1530 | 19 | 1486  | 27   | 107.1 | 1591       | 25 |
| 24                                                                                                                                      | 87   | 338    | 0.26   | 0.1612 | 0.0044 | 10.000 | 0.0028 | 0.4503 | 0.0092 | 2468 | 47 | 2435 | 26 | 2396  | 41   | 103.0 | 2468       | 47 |
| 25                                                                                                                                      | 164  | 186    | 0.88   | 0.0760 | 0.0015 | 1.728  | 0.0047 | 0.1650 | 0.0036 | 1094 | 41 | 1019 | 17 | 984   | 20   | 103.6 | 984        | 20 |
| 26                                                                                                                                      | 170  | 206    | 0.83   | 0.0711 | 0.0011 | 1.575  | 0.0037 | 0.1606 | 0.0030 | 960  | 32 | 960  | 15 | 960   | 17   | 100.0 | 960        | 17 |
| 27                                                                                                                                      | 198  | 502    | 0.39   | 0.0596 | 0.0009 | 0.7140 | 0.0016 | 0.0868 | 0.0013 | 589  | 32 | 547  | 9  | 537   | 8    | 101.9 | 537        | 8  |
| 28                                                                                                                                      | 614  | 867    | 0.71   | 0.1172 | 0.0013 | 3.978  | 0.0075 | 0.2461 | 0.0033 | 1914 | 20 | 1630 | 15 | 1418  | 17   | 135.0 | Discordant |    |
| 29                                                                                                                                      | 189  | 324    | 0.58   | 0.0657 | 0.0013 | 0.6880 | 0.0018 | 0.0759 | 0.0015 | 796  | 43 | 531  | 11 | 472   | 9    | 112.5 | Discordant |    |
| 30                                                                                                                                      | 433  | 296    | 1.47   | 0.1646 | 0.0036 | 10.160 | 0.0025 | 0.4476 | 0.0094 | 2503 | 38 | 2449 | 23 | 2384  | 42   | 105.0 | 2503       | 38 |
| 31                                                                                                                                      | 100  | 189    | 0.53   | 0.0740 | 0.0015 | 1.173  | 0.0029 | 0.1150 | 0.0020 | 1041 | 41 | 788  | 14 | 701   | 12   | 112.4 | Discordant |    |
| 32                                                                                                                                      | 96   | 132    | 0.72   | 0.0584 | 0.0014 | 0.5520 | 0.0015 | 0.0685 | 0.0011 | 546  | 52 | 446  | 10 | 427   | 7    | 104.4 | 427        | 7  |
| Sample KG25, metagreywacke, Kembel River of north Atbashi Range, Atbashi HP-LT belt, (Rojas-Agramonte et al., 2014, Gondwana            |      |        |        |        |        |        |        |        |        |      |    |      |    |       |      |       |            |    |

|                                                                                                                                                                 |        |        |        |        |        |        |        |      |      |      |      |       |            |      |    |
|-----------------------------------------------------------------------------------------------------------------------------------------------------------------|--------|--------|--------|--------|--------|--------|--------|------|------|------|------|-------|------------|------|----|
| KG29-8                                                                                                                                                          | 0.0533 | 0.0011 | 0.3949 | 0.0082 | 0.0538 | 0.0007 | 341    | 42   | 338  | 6    | 338  | 4     | 100.1      | 338  | 4  |
| KG29-9                                                                                                                                                          | 0.0555 | 0.0011 | 0.5273 | 0.0109 | 0.0684 | 0.0009 | 432    | 40   | 430  | 7    | 427  | 6     | 100.7      | 427  | 6  |
| KG29-10                                                                                                                                                         | 0.0553 | 0.0018 | 0.5161 | 0.0164 | 0.0680 | 0.0010 | 425    | 68   | 423  | 11   | 424  | 6     | 99.6       | 424  | 6  |
| KG29-11                                                                                                                                                         | 0.0702 | 0.0015 | 1.504  | 0.0331 | 0.1552 | 0.0021 | 935    | 41   | 932  | 13   | 930  | 12    | 100.2      | 930  | 12 |
| KG29-12                                                                                                                                                         | 0.1614 | 0.0032 | 10.362 | 0.2260 | 0.4658 | 0.0063 | 2470   | 27   | 2468 | 17   | 2465 | 28    | 100.2      | 2470 | 27 |
| KG29-13                                                                                                                                                         | 0.1765 | 0.0029 | 12.072 | 0.2210 | 0.4981 | 0.0067 | 2620   | 27   | 2610 | 17   | 2606 | 29    | 100.6      | 2620 | 27 |
| KG29-14                                                                                                                                                         | 0.1175 | 0.0031 | 5.586  | 0.1555 | 0.3455 | 0.0049 | 1918   | 34   | 1914 | 19   | 1913 | 23    | 100.3      | 1918 | 34 |
| KG29-15                                                                                                                                                         | 0.1079 | 0.0024 | 4.671  | 0.1087 | 0.3136 | 0.0044 | 1764   | 38   | 1762 | 19   | 1759 | 22    | 100.3      | 1764 | 38 |
| KG29-16                                                                                                                                                         | 0.0768 | 0.0017 | 1.990  | 0.0447 | 0.1875 | 0.0026 | 1116   | 41   | 1112 | 15   | 1108 | 14    | 100.7      | 1116 | 41 |
| KG29-17                                                                                                                                                         | 0.1300 | 0.0032 | 6.872  | 0.1801 | 0.3841 | 0.0053 | 2098   | 33   | 2095 | 19   | 2095 | 25    | 100.1      | 2098 | 33 |
| KG29-18                                                                                                                                                         | 0.0561 | 0.0049 | 0.5638 | 0.0482 | 0.0728 | 0.0012 | 455    | 57   | 454  | 20   | 453  | 7     | 100.2      | 453  | 7  |
| KG29-19                                                                                                                                                         | 0.0533 | 0.0039 | 0.3950 | 0.0267 | 0.0535 | 0.0010 | 340    | 143  | 338  | 19   | 336  | 6     | 100.5      | 336  | 6  |
| KG29-20                                                                                                                                                         | 0.1345 | 0.0030 | 7.351  | 0.1733 | 0.3962 | 0.0054 | 2157   | 33   | 2155 | 19   | 2151 | 25    | 100.3      | 2157 | 33 |
| KG29-21                                                                                                                                                         | 0.1558 | 0.0031 | 9.682  | 0.2026 | 0.4524 | 0.0061 | 2410   | 32   | 2405 | 19   | 2406 | 27    | 100.2      | 2410 | 32 |
| KG29-22                                                                                                                                                         | 0.0630 | 0.0016 | 1.003  | 0.0256 | 0.1153 | 0.0016 | 707    | 50   | 705  | 13   | 704  | 9     | 100.2      | 704  | 9  |
| KG29-23                                                                                                                                                         | 0.0649 | 0.0021 | 1.135  | 0.0375 | 0.1265 | 0.0019 | 772    | 66   | 770  | 18   | 768  | 11    | 100.3      | 768  | 11 |
| KG29-24                                                                                                                                                         | 0.0583 | 0.0030 | 0.6987 | 0.0357 | 0.0869 | 0.0015 | 539    | 101  | 538  | 21   | 537  | 9     | 100.1      | 537  | 9  |
| KG29-25                                                                                                                                                         | 0.0647 | 0.0016 | 1.118  | 0.0286 | 0.1250 | 0.0017 | 764    | 50   | 762  | 14   | 759  | 10    | 100.4      | 759  | 10 |
| Sample 14AT10, garnet-bearing micaschist, Kembel River on the northern Atbashi Range, Atabashi HP-LT belt, (Sang et al., 2017, Journal of Asian Earth Sciences) |        |        |        |        |        |        |        |      |      |      |      |       |            |      |    |
| 14AT10-1                                                                                                                                                        | 269    | 377    | 0.71   | 0.4103 | 0.0155 | 0.0559 | 0.0012 | 349  | 11   | 351  | 7    | 99.6  | 351        | 7    |    |
| 14AT10-2                                                                                                                                                        | 259    | 475    | 0.54   | 0.4458 | 0.0157 | 0.0487 | 0.0011 | 374  | 11   | 307  | 7    | 122.1 | Discordant |      |    |
| 14AT10-3                                                                                                                                                        | 158    | 410    | 0.39   | 0.3952 | 0.0134 | 0.0528 | 0.0011 | 338  | 10   | 332  | 7    | 101.9 | 332        | 7    |    |
| 14AT10-4                                                                                                                                                        | 111    | 185    | 0.60   | 0.4090 | 0.0144 | 0.0507 | 0.0011 | 348  | 10   | 319  | 7    | 109.2 | 319        | 7    |    |
| 14AT10-5                                                                                                                                                        | 197    | 159    | 1.24   | 0.3963 | 0.0167 | 0.0527 | 0.0012 | 339  | 12   | 331  | 7    | 102.3 | 331        | 7    |    |
| 14AT10-6                                                                                                                                                        | 105    | 97     | 1.08   | 0.3861 | 0.0215 | 0.0525 | 0.0013 | 332  | 16   | 330  | 8    | 100.5 | 330        | 8    |    |
| 14AT10-7                                                                                                                                                        | 136    | 454    | 0.30   | 0.3581 | 0.0141 | 0.0432 | 0.0010 | 311  | 11   | 272  | 6    | 114.1 | Discordant |      |    |
| 14AT10-8                                                                                                                                                        | 167    | 330    | 0.50   | 0.3988 | 0.0119 | 0.0495 | 0.0010 | 341  | 9    | 311  | 6    | 109.5 | 311        | 6    |    |
| 14AT10-9                                                                                                                                                        | 209    | 334    | 0.63   | 0.4145 | 0.0132 | 0.0520 | 0.0011 | 352  | 9    | 327  | 7    | 107.8 | 327        | 7    |    |
| 14AT10-10                                                                                                                                                       | 289    | 337    | 0.86   | 0.4030 | 0.0106 | 0.0528 | 0.0011 | 344  | 8    | 331  | 7    | 103.7 | 331        | 7    |    |
| 14AT10-11                                                                                                                                                       | 249    | 298    | 0.84   | 4.072  | 0.0518 | 0.2475 | 0.0047 | 1649 | 10   | 1425 | 24   | 115.7 | Discordant |      |    |
| Sample 14AT17, greywacke, northern Dzhagdzhir Range, Atabashi HP-LT belt, (Sang et al., 2017, Journal of Asian Earth Sciences)                                  |        |        |        |        |        |        |        |      |      |      |      |       |            |      |    |
| 14AT17-1                                                                                                                                                        | 445    | 885    | 0.50   | 0.3557 | 0.0211 | 0.0482 | 0.0009 | 309  | 16   | 303  | 5    | 101.9 | 303        | 5    |    |
| 14AT17-2                                                                                                                                                        | 1722   | 2272   | 0.76   | 8.122  | 0.4187 | 0.4168 | 0.0095 | 2245 | 47   | 2246 | 43   | 99.9  | 2246       | 43   |    |
| 14AT17-3                                                                                                                                                        | 296    | 518    | 0.57   | 0.4559 | 0.0309 | 0.0617 | 0.0012 | 381  | 22   | 386  | 8    | 98.8  | 386        | 8    |    |
| 14AT17-4                                                                                                                                                        | 218    | 451    | 0.48   | 0.4574 | 0.0314 | 0.0610 | 0.0014 | 382  | 22   | 382  | 8    | 100.1 | 382        | 8    |    |
| 14AT17-5                                                                                                                                                        | 529    | 936    | 0.56   | 0.4490 | 0.0298 | 0.0599 | 0.0013 | 377  | 21   | 375  | 8    | 100.4 | 375        | 8    |    |
| 14AT17-6                                                                                                                                                        | 210    | 414    | 0.51   | 0.4391 | 0.0330 | 0.0589 | 0.0014 | 370  | 23   | 369  | 9    | 100.1 | 369        | 9    |    |
| 14AT17-7                                                                                                                                                        | 352    | 583    | 0.60   | 0.4485 | 0.0718 | 0.0598 | 0.0028 | 376  | 50   | 375  | 17   | 100.5 | 375        | 17   |    |
| 14AT17-8                                                                                                                                                        | 293    | 638    | 0.46   | 0.3825 | 0.0301 | 0.0594 | 0.0016 | 329  | 22   | 372  | 10   | 88.4  | Discordant |      |    |
| 14AT17-9                                                                                                                                                        | 198    | 420    | 0.47   | 0.5096 | 0.1020 | 0.0606 | 0.0016 | 418  | 69   | 380  | 10   | 110.2 | Discordant |      |    |
| 14AT17-10                                                                                                                                                       | 411    | 924    | 0.45   | 0.4338 | 0.0279 | 0.0595 | 0.0013 | 366  | 20   | 373  | 8    | 98.2  | 373        | 8    |    |
| 14AT17-11                                                                                                                                                       | 361    | 875    | 0.41   | 0.3972 | 0.0221 | 0.0598 | 0.0012 | 340  | 16   | 374  | 7    | 90.8  | 374        | 7    |    |
| 14AT17-12                                                                                                                                                       | 385    | 786    | 0.49   | 0.5002 | 0.0253 | 0.0660 | 0.0012 | 412  | 17   | 412  | 7    | 100.0 | 412        | 7    |    |
| 14AT17-13                                                                                                                                                       | 506    | 896    | 0.56   | 0.4707 | 0.0202 | 0.0634 | 0.0009 | 392  | 14   | 396  | 6    | 98.8  | 396        | 6    |    |
| 14AT17-14                                                                                                                                                       | 667    | 1097   | 0.61   | 0.4761 | 0.0158 | 0.0634 | 0.0008 | 395  | 11   | 396  | 5    | 98.9  | 396        | 5    |    |
| 14AT17-15                                                                                                                                                       | 229    | 449    | 0.51   | 0.4719 | 0.0193 | 0.0630 | 0.0008 | 392  | 13   | 394  | 5    | 99.6  | 394        | 5    |    |
| 14AT17-16                                                                                                                                                       | 129    | 582    | 0.22   | 6.676  | 0.1822 | 0.3759 | 0.0051 | 2070 | 24   | 2057 | 24   | 100.6 | 2057       | 24   |    |
| 14AT17-17                                                                                                                                                       | 274    | 610    | 0.45   | 0.4813 | 0.0145 | 0.0627 | 0.0007 | 399  | 10   | 392  | 4    | 101.7 | 392        | 4    |    |
| 14AT17-18                                                                                                                                                       | 429    | 702    | 0.61   | 0.5347 | 0.0173 | 0.0679 | 0.0010 | 435  | 11   | 423  | 6    | 102.7 | 423        | 6    |    |
| 14AT17-19                                                                                                                                                       | 505    | 978    | 0.52   | 0.4465 | 0.0143 | 0.0590 | 0.0007 | 375  | 10   | 370  | 4    | 101.4 | 370        | 4    |    |
| 14AT17-20                                                                                                                                                       | 231    | 429    | 0.54   | 0.4435 | 0.0184 | 0.0600 | 0.0007 | 373  | 13   | 376  | 4    | 99.2  | 376        | 4    |    |
| 14AT17-21                                                                                                                                                       | 157    | 348    | 0.45   | 0.4808 | 0.0201 | 0.0606 | 0.0008 | 399  | 14   | 379  | 5    | 105.1 | 379        | 5    |    |
| 14AT17-22                                                                                                                                                       | 692    | 1209   | 0.57   | 0.4606 | 0.0196 | 0.0622 | 0.0009 | 385  | 14   | 389  | 5    | 99.0  | 389        | 5    |    |
| 14AT17-23                                                                                                                                                       | 214    | 444    | 0.48   | 0.4464 | 0.0176 | 0.0599 | 0.0009 | 375  | 12   | 375  | 5    | 99.9  | 375        | 5    |    |
| 14AT17-24                                                                                                                                                       | 194    | 418    | 0.46   | 0.4662 | 0.0194 | 0.0598 | 0.0010 | 389  | 13   | 374  | 6    | 103.8 | 374        | 6    |    |
| 14AT17-25                                                                                                                                                       | 202    | 464    | 0.43   | 0.4687 | 0.0195 | 0.0599 | 0.0011 | 390  | 13   | 375  | 7    | 104.1 | 375        | 7    |    |
| 14AT17-26                                                                                                                                                       | 493    | 646    | 0.76   | 1.685  | 0.0551 | 0.1679 | 0.0035 | 1003 | 21   | 1000 | 19   | 100.2 | 1000       | 19   |    |
| 14AT17-27                                                                                                                                                       | 371    | 624    | 0.59   | 0.4808 | 0.0293 | 0.0624 | 0.0019 | 399  | 20   | 390  | 11   | 102.2 | 390        | 11   |    |
| 14AT17-28                                                                                                                                                       | 420    | 975    | 0.43   | 0.5019 | 0.0210 | 0.0653 | 0.0043 | 413  | 14   | 408  | 26   | 101.3 | 408        | 26   |    |
| 14AT17-29                                                                                                                                                       | 421    | 841    | 0.50   | 0.5109 | 0.0220 | 0.0645 | 0.0012 | 419  | 15   | 403  | 7    | 104.0 | 403        | 7    |    |
| 14AT17-30                                                                                                                                                       | 727    | 1526   | 0.48   | 0.5206 | 0.0233 | 0.0676 | 0.0013 | 426  | 16   | 421  | 8    | 101.0 | 421        | 8    |    |
| 14AT17-31                                                                                                                                                       | 385    | 715    | 0.54   | 0.4880 | 0.0241 | 0.0645 | 0.0012 | 404  | 16   | 403  | 7    | 100.1 | 403        | 7    |    |
| 14AT17-32                                                                                                                                                       | 845    | 1439   | 0.59   | 0.4978 | 0.0243 | 0.0651 | 0.0012 | 410  | 16   | 407  | 7    | 100.8 | 407        | 7    |    |
| 14AT17-33                                                                                                                                                       | 328    | 598    | 0.55   | 0.4655 | 0.0261 | 0.0617 | 0.0011 | 388  | 18   | 386  | 7    | 100.5 | 386        | 7    |    |
| 14AT17-34                                                                                                                                                       | 360    | 773    | 0.47   | 0.5107 | 0.0332 | 0.0669 | 0.0014 | 419  | 22   | 418  | 8    | 100.3 | 418        | 8    |    |
| 14AT17-35                                                                                                                                                       | 503    | 910    | 0.55   | 0.4629 | 0.0280 | 0.0614 | 0.0012 | 386  | 19   | 384  | 7    | 100.5 | 384        | 7    |    |
| 14AT17-36                                                                                                                                                       | 524    | 960    | 0.55   | 0.4704 | 0.0262 | 0.0627 | 0.0011 | 391  | 18   | 392  | 7    | 99.9  | 392        | 7    |    |
| 14AT17-37                                                                                                                                                       | 179    | 501    | 0.36   | 0.5366 | 0.0286 | 0.0678 | 0.0012 | 436  | 19   | 423  | 7    | 103.1 | 423        | 7    |    |
| 14AT17-38                                                                                                                                                       | 257    | 651    | 0.40   | 0.4585 | 0.0331 | 0.0612 | 0.0011 | 383  | 23   | 383  | 7    | 100.1 | 383        | 7    |    |
| 14AT17-39                                                                                                                                                       | 861    | 1524   | 0.56   | 0.4561 | 0.0202 | 0.0623 | 0.0008 | 382  | 14   | 389  | 5    | 98.0  | 389        | 5    |    |
| 14AT17-40                                                                                                                                                       | 229    | 418    | 0.55   | 0.5234 | 0.0417 | 0.0676 | 0.0023 | 427  | 28   | 422  | 14   | 101.3 | 422        | 14   |    |
| 14AT17-41                                                                                                                                                       | 171    | 450    | 0.38   | 0.4384 | 0.0244 | 0.0614 | 0.0009 | 369  | 17   | 384  | 6    | 96.0  | 384        | 6    |    |
| 14AT17-42                                                                                                                                                       | 225    | 441    | 0.51   | 0.5014 | 0.0308 | 0.0652 | 0.0012 | 413  | 21   | 407  | 7    | 101.4 | 407        | 7    |    |
| 14AT17-43                                                                                                                                                       | 606    | 989    | 0.61   | 0.4870 | 0.0252 | 0.0652 | 0.0008 | 403  | 17   | 407  | 5    | 98.9  | 407        | 5    |    |
| 14AT17-44                                                                                                                                                       | 444    | 775    | 0.57   | 0.4730 | 0.0224 | 0.0645 | 0.0008 | 393  | 15   | 403  | 5    | 97.6  | 403        | 5    |    |
| 14AT17-45                                                                                                                                                       | 208    | 491    | 0.42   | 0.5071 | 0.0239 | 0.0668 | 0.0010 | 417  | 16   | 417  | 6    | 99.9  | 417        | 6    |    |
| 14AT17-46                                                                                                                                                       | 142    | 385    | 0.37   | 0.4921 | 0.0345 | 0.0649 | 0.0010 | 406  | 23   | 406  | 6    | 100.2 | 406        | 6    |    |
| 14AT17-47                                                                                                                                                       | 520    | 865    | 0.60   | 0.4799 | 0.0201 | 0.0637 | 0.0006 | 398  | 14   | 398  | 4    | 99.9  | 398        | 4    |    |
| 14AT17-48                                                                                                                                                       | 1868   | 532    | 3.51   | 0.8379 | 0.0297 | 0.1011 | 0.0012 | 618  | 16   | 621  | 7    | 99.5  | 621        | 7    |    |
| 14AT17-49                                                                                                                                                       | 381    | 644    | 0.59   | 0.4730 | 0.0148 | 0.0632 | 0.0007 | 393  | 10   | 395  | 4    | 99.6  | 395        | 4    |    |
| 14AT17-50                                                                                                                                                       | 567    | 1031   | 0.55   | 0.4715 | 0.0162 | 0.0627 | 0.0008 | 392  | 11   | 392  | 5    | 100.0 | 392        | 5    |    |
| 14AT17-51                                                                                                                                                       | 218    | 508    | 0.43   | 0.5334 | 0.0708 | 0.0699 | 0.0028 | 434  | 47   | 436  | 17   | 99.7  | 436        | 17   |    |
| 14AT17-52                                                                                                                                                       | 309    | 705    | 0.44   | 0.4765 | 0.0555 | 0.0630 | 0.0014 | 396  | 38   | 394  | 9    | 100.5 | 394        | 9    |    |
| Sample 14AT37, greywacke, northern Atbashi Range, Atabashi HP-LT belt, (Sang et al., 2017, Journal of Asian Earth Sciences)                                     |        |        |        |        |        |        |        |      |      |      |      |       |            |      |    |
| 14AT37-1                                                                                                                                                        | 57     | 110    | 0.52   | 0.5509 | 0.0190 | 0.0713 | 0.0016 | 446  | 12   | 444  | 10   | 100.3 | 444        | 10   |    |
| 14AT37-2                                                                                                                                                        | 83     | 130    | 0.64   | 0.5505 | 0.0154 | 0.0711 | 0.0015 | 445  | 10   | 443  | 9    | 100.5 | 443        | 9    |    |
| 14AT37-3                                                                                                                                                        | 125    | 345    | 0.36   | 0.1089 | 0.1071 | 0.4629 | 0.0090 | 2452 | 10   | 2452 | 40   | 100.0 | 2452       | 40   |    |
| 14AT37-4                                                                                                                                                        | 465    | 347    | 1.34   | 0.5524 | 0.011  |        |        |      |      |      |      |       |            |      |    |

|           |     |     |      |        |        |        |        |      |    |      |    |       |      |    |
|-----------|-----|-----|------|--------|--------|--------|--------|------|----|------|----|-------|------|----|
| 14AT37-33 | 54  | 192 | 0.28 | 2.392  | 0.0429 | 0.2123 | 0.0043 | 1240 | 13 | 1241 | 23 | 99.9  | 1241 | 23 |
| 14AT37-34 | 211 | 323 | 0.65 | 0.5285 | 0.0111 | 0.0690 | 0.0014 | 431  | 7  | 430  | 8  | 100.2 | 430  | 8  |
| 14AT37-35 | 283 | 707 | 0.40 | 0.4960 | 0.0110 | 0.0645 | 0.0013 | 409  | 7  | 403  | 8  | 101.5 | 403  | 8  |
| 14AT37-36 | 163 | 259 | 0.63 | 0.5310 | 0.0238 | 0.0690 | 0.0017 | 433  | 16 | 430  | 10 | 100.6 | 430  | 10 |
| 14AT37-37 | 321 | 425 | 0.75 | 0.4908 | 0.0118 | 0.0650 | 0.0013 | 405  | 8  | 406  | 8  | 99.9  | 406  | 8  |
| 14AT37-38 | 200 | 315 | 0.63 | 0.4949 | 0.0135 | 0.0653 | 0.0014 | 408  | 9  | 408  | 8  | 100.1 | 408  | 8  |
| 14AT37-39 | 88  | 47  | 1.88 | 1.130  | 0.0678 | 0.1264 | 0.0038 | 768  | 32 | 768  | 22 | 100.1 | 768  | 22 |
| 14AT37-40 | 225 | 285 | 0.79 | 0.4940 | 0.0103 | 0.0652 | 0.0013 | 408  | 7  | 407  | 8  | 100.1 | 407  | 8  |
| 14AT37-41 | 534 | 508 | 1.05 | 0.4925 | 0.0108 | 0.0628 | 0.0013 | 407  | 7  | 393  | 8  | 103.6 | 393  | 8  |
| 14AT37-42 | 430 | 253 | 1.70 | 0.7762 | 0.0235 | 0.0948 | 0.0021 | 583  | 13 | 584  | 12 | 99.9  | 584  | 12 |
| 14AT37-43 | 160 | 284 | 0.57 | 0.5107 | 0.0155 | 0.0672 | 0.0015 | 419  | 10 | 419  | 9  | 100.0 | 419  | 9  |
| 14AT37-44 | 154 | 207 | 0.74 | 0.4928 | 0.0128 | 0.0640 | 0.0013 | 407  | 9  | 400  | 8  | 101.7 | 400  | 8  |
| 14AT37-45 | 121 | 197 | 0.61 | 0.5076 | 0.0139 | 0.0661 | 0.0014 | 417  | 9  | 413  | 8  | 101.0 | 413  | 8  |
| 14AT37-46 | 186 | 334 | 0.56 | 0.4723 | 0.0149 | 0.0614 | 0.0013 | 393  | 10 | 384  | 8  | 102.3 | 384  | 8  |
| 14AT37-47 | 141 | 254 | 0.56 | 0.5266 | 0.0119 | 0.0674 | 0.0014 | 430  | 8  | 420  | 8  | 102.2 | 420  | 8  |
| 14AT37-48 | 337 | 495 | 0.68 | 0.5637 | 0.0097 | 0.0702 | 0.0014 | 454  | 6  | 437  | 8  | 103.8 | 437  | 8  |
| 14AT37-49 | 306 | 339 | 0.90 | 0.5166 | 0.0198 | 0.0675 | 0.0016 | 423  | 13 | 421  | 9  | 100.5 | 421  | 9  |
| 14AT37-50 | 149 | 535 | 0.28 | 1.721  | 0.0224 | 0.1707 | 0.0033 | 1016 | 8  | 1016 | 18 | 100.0 | 1016 | 18 |
| 14AT37-51 | 135 | 231 | 0.58 | 0.5688 | 0.0132 | 0.0727 | 0.0015 | 457  | 9  | 452  | 9  | 101.1 | 452  | 9  |
| 14AT37-52 | 342 | 420 | 0.82 | 0.5536 | 0.0123 | 0.0718 | 0.0015 | 447  | 8  | 447  | 9  | 100.0 | 447  | 9  |
| 14AT37-53 | 267 | 333 | 0.80 | 0.5605 | 0.0134 | 0.0717 | 0.0015 | 452  | 9  | 446  | 9  | 101.3 | 446  | 9  |
| 14AT37-54 | 95  | 179 | 0.53 | 0.5294 | 0.0134 | 0.0686 | 0.0014 | 431  | 9  | 428  | 9  | 100.9 | 428  | 9  |
| 14AT37-55 | 46  | 150 | 0.31 | 1.666  | 0.0388 | 0.1676 | 0.0036 | 996  | 15 | 999  | 20 | 99.7  | 999  | 20 |
| 14AT37-56 | 179 | 408 | 0.44 | 0.5677 | 0.0117 | 0.0710 | 0.0014 | 457  | 8  | 442  | 9  | 103.2 | 442  | 9  |
| 14AT37-57 | 134 | 272 | 0.49 | 0.5384 | 0.0131 | 0.0685 | 0.0014 | 437  | 9  | 427  | 9  | 102.4 | 427  | 9  |
| 14AT37-58 | 115 | 218 | 0.53 | 0.5001 | 0.0156 | 0.0654 | 0.0014 | 412  | 11 | 409  | 9  | 100.8 | 409  | 9  |
| 14AT37-59 | 208 | 296 | 0.70 | 0.5251 | 0.0153 | 0.0680 | 0.0015 | 429  | 10 | 424  | 9  | 101.1 | 424  | 9  |
| 14AT37-60 | 152 | 263 | 0.58 | 0.5356 | 0.0138 | 0.0675 | 0.0014 | 436  | 9  | 421  | 9  | 103.5 | 421  | 9  |
| 14AT37-61 | 66  | 171 | 0.38 | 1.169  | 0.0322 | 0.1275 | 0.0028 | 786  | 15 | 774  | 16 | 101.6 | 774  | 16 |
| 14AT37-62 | 205 | 236 | 0.87 | 0.5090 | 0.0146 | 0.0652 | 0.0014 | 418  | 10 | 407  | 8  | 102.6 | 407  | 8  |
| 14AT37-63 | 363 | 332 | 1.09 | 0.5097 | 0.0187 | 0.0659 | 0.0015 | 418  | 13 | 411  | 9  | 101.7 | 411  | 9  |
| 14AT37-64 | 47  | 29  | 1.58 | 9.878  | 0.2251 | 0.4565 | 0.0109 | 2424 | 21 | 2424 | 48 | 100.0 | 2424 | 48 |
| 14AT37-65 | 78  | 154 | 0.51 | 0.4940 | 0.0190 | 0.0632 | 0.0015 | 408  | 13 | 395  | 9  | 103.2 | 395  | 9  |
| 14AT37-66 | 249 | 283 | 0.88 | 0.5190 | 0.0187 | 0.0674 | 0.0015 | 425  | 12 | 420  | 9  | 101.0 | 420  | 9  |
| 14AT37-67 | 66  | 98  | 0.67 | 0.5086 | 0.0220 | 0.0669 | 0.0016 | 418  | 15 | 417  | 10 | 100.0 | 417  | 10 |
| 14AT37-68 | 70  | 83  | 0.84 | 1.127  | 0.0531 | 0.1256 | 0.0033 | 766  | 25 | 763  | 19 | 100.5 | 763  | 19 |

Sample 14AT39, metasandstone, northern Atbashi Range, Atabashi HP-LT belt, (Sang et al., 2017, Journal of Asian Earth Sciences)

|           |     |     |      |        |        |        |        |      |    |      |    |       |      |    |
|-----------|-----|-----|------|--------|--------|--------|--------|------|----|------|----|-------|------|----|
| 14AT39-1  | 159 | 199 | 0.80 | 0.4963 | 0.0322 | 0.0654 | 0.0019 | 409  | 22 | 409  | 12 | 100.1 | 409  | 12 |
| 14AT39-2  | 193 | 302 | 0.64 | 0.4847 | 0.0128 | 0.0664 | 0.0014 | 401  | 9  | 414  | 8  | 96.9  | 414  | 8  |
| 14AT39-3  | 130 | 256 | 0.51 | 0.5302 | 0.0143 | 0.0694 | 0.0014 | 432  | 9  | 433  | 9  | 99.8  | 433  | 9  |
| 14AT39-4  | 196 | 257 | 0.76 | 0.5134 | 0.0144 | 0.0682 | 0.0014 | 421  | 10 | 425  | 8  | 98.9  | 425  | 8  |
| 14AT39-5  | 236 | 330 | 0.72 | 0.5329 | 0.0214 | 0.0679 | 0.0016 | 434  | 14 | 424  | 10 | 102.4 | 424  | 10 |
| 14AT39-6  | 67  | 222 | 0.30 | 1.172  | 0.0247 | 0.1305 | 0.0026 | 788  | 12 | 791  | 15 | 99.6  | 791  | 15 |
| 14AT39-7  | 98  | 205 | 0.48 | 0.5753 | 0.0169 | 0.0742 | 0.0016 | 461  | 11 | 461  | 9  | 100.0 | 461  | 9  |
| 14AT39-8  | 213 | 336 | 0.63 | 0.5158 | 0.0215 | 0.0662 | 0.0016 | 422  | 14 | 413  | 9  | 102.2 | 413  | 9  |
| 14AT39-9  | 197 | 280 | 0.70 | 0.4909 | 0.0134 | 0.0655 | 0.0014 | 406  | 9  | 409  | 8  | 99.1  | 409  | 8  |
| 14AT39-10 | 34  | 272 | 0.13 | 1.696  | 0.0306 | 0.1685 | 0.0033 | 1007 | 12 | 1004 | 18 | 100.3 | 1004 | 18 |
| 14AT39-11 | 149 | 246 | 0.61 | 2.609  | 0.0474 | 0.2234 | 0.0045 | 1303 | 13 | 1300 | 24 | 100.3 | 1300 | 24 |
| 14AT39-12 | 234 | 214 | 1.09 | 0.4973 | 0.0155 | 0.0666 | 0.0014 | 410  | 10 | 415  | 8  | 98.7  | 415  | 8  |
| 14AT39-13 | 118 | 117 | 1.01 | 10.559 | 0.1460 | 0.4696 | 0.0094 | 2485 | 13 | 2482 | 41 | 100.1 | 2482 | 41 |
| 14AT39-14 | 96  | 188 | 0.51 | 0.5271 | 0.0195 | 0.0681 | 0.0015 | 430  | 13 | 425  | 9  | 101.2 | 425  | 9  |
| 14AT39-15 | 134 | 279 | 0.48 | 4.563  | 0.0598 | 0.3108 | 0.0060 | 1743 | 11 | 1745 | 29 | 99.9  | 1745 | 29 |
| 14AT39-16 | 80  | 263 | 0.30 | 0.5488 | 0.0145 | 0.0705 | 0.0015 | 444  | 10 | 439  | 9  | 101.1 | 439  | 9  |
| 14AT39-17 | 287 | 554 | 0.52 | 0.5055 | 0.0114 | 0.0662 | 0.0013 | 415  | 8  | 413  | 8  | 100.6 | 413  | 8  |
| 14AT39-18 | 109 | 148 | 0.74 | 0.4768 | 0.0268 | 0.0633 | 0.0017 | 396  | 18 | 396  | 10 | 100.1 | 396  | 10 |
| 14AT39-19 | 165 | 394 | 0.42 | 1.498  | 0.0318 | 0.1538 | 0.0031 | 929  | 13 | 922  | 17 | 100.8 | 922  | 17 |
| 14AT39-20 | 138 | 249 | 0.55 | 0.4880 | 0.0186 | 0.0635 | 0.0014 | 404  | 13 | 397  | 9  | 101.8 | 397  | 9  |
| 14AT39-21 | 48  | 54  | 0.90 | 6.180  | 0.1375 | 0.3641 | 0.0081 | 2002 | 19 | 2001 | 38 | 100.0 | 2001 | 38 |
| 14AT39-22 | 261 | 221 | 1.18 | 0.5095 | 0.0242 | 0.0673 | 0.0017 | 418  | 16 | 420  | 10 | 99.6  | 420  | 10 |
| 14AT39-23 | 224 | 315 | 0.71 | 0.4383 | 0.0214 | 0.0573 | 0.0014 | 369  | 15 | 359  | 9  | 102.8 | 359  | 9  |
| 14AT39-24 | 281 | 311 | 0.90 | 0.4854 | 0.0128 | 0.0643 | 0.0013 | 402  | 9  | 402  | 8  | 100.0 | 402  | 8  |
| 14AT39-25 | 298 | 579 | 0.51 | 0.4709 | 0.0108 | 0.0633 | 0.0013 | 392  | 7  | 396  | 8  | 99.0  | 396  | 8  |
| 14AT39-26 | 237 | 267 | 0.89 | 2.155  | 0.0384 | 0.1984 | 0.0039 | 1167 | 12 | 1167 | 21 | 100.0 | 1167 | 21 |
| 14AT39-27 | 167 | 289 | 0.58 | 0.4591 | 0.0173 | 0.0613 | 0.0014 | 384  | 12 | 384  | 8  | 100.0 | 384  | 8  |
| 14AT39-28 | 102 | 269 | 0.38 | 1.428  | 0.0361 | 0.1508 | 0.0032 | 901  | 15 | 906  | 18 | 99.5  | 906  | 18 |
| 14AT39-29 | 175 | 334 | 0.53 | 0.5131 | 0.0134 | 0.0679 | 0.0014 | 421  | 9  | 423  | 8  | 99.4  | 423  | 8  |
| 14AT39-30 | 133 | 251 | 0.53 | 0.4913 | 0.0167 | 0.0649 | 0.0014 | 406  | 11 | 405  | 9  | 100.2 | 405  | 9  |
| 14AT39-31 | 24  | 112 | 0.21 | 1.078  | 0.0479 | 0.1222 | 0.0031 | 743  | 23 | 743  | 18 | 100.0 | 743  | 18 |
| 14AT39-32 | 128 | 167 | 0.76 | 0.4702 | 0.0203 | 0.0626 | 0.0015 | 391  | 14 | 391  | 9  | 100.0 | 391  | 9  |
| 14AT39-33 | 59  | 137 | 0.43 | 0.5020 | 0.0250 | 0.0660 | 0.0016 | 413  | 17 | 412  | 10 | 100.2 | 412  | 10 |
| 14AT39-34 | 233 | 203 | 1.14 | 0.5589 | 0.0281 | 0.0721 | 0.0018 | 451  | 18 | 449  | 11 | 100.4 | 449  | 11 |
| 14AT39-35 | 358 | 376 | 0.95 | 1.335  | 0.0249 | 0.1422 | 0.0028 | 861  | 11 | 857  | 16 | 100.5 | 857  | 16 |
| 14AT39-36 | 70  | 130 | 0.54 | 0.5385 | 0.0213 | 0.0703 | 0.0016 | 437  | 14 | 438  | 10 | 99.9  | 438  | 10 |
| 14AT39-37 | 126 | 411 | 0.31 | 1.468  | 0.0264 | 0.1523 | 0.0030 | 917  | 11 | 914  | 17 | 100.4 | 914  | 17 |
| 14AT39-38 | 227 | 343 | 0.66 | 0.5164 | 0.0143 | 0.0665 | 0.0014 | 423  | 10 | 415  | 8  | 101.9 | 415  | 8  |
| 14AT39-39 | 70  | 60  | 1.17 | 0.6878 | 0.0384 | 0.0858 | 0.0023 | 532  | 23 | 531  | 13 | 100.2 | 531  | 13 |
| 14AT39-40 | 203 | 372 | 0.55 | 0.5604 | 0.0142 | 0.0725 | 0.0015 | 452  | 9  | 451  | 9  | 100.2 | 451  | 9  |
| 14AT39-41 | 116 | 255 | 0.45 | 1.665  | 0.0373 | 0.1669 | 0.0034 | 995  | 14 | 995  | 19 | 100.0 | 995  | 19 |
| 14AT39-42 | 106 | 190 | 0.56 | 0.5036 | 0.0175 | 0.0664 | 0.0015 | 414  | 12 | 414  | 9  | 100.0 | 414  | 9  |
| 14AT39-43 | 34  | 513 | 0.07 | 0.9171 | 0.0171 | 0.1072 | 0.0021 | 661  | 9  | 657  | 12 | 100.6 | 657  | 12 |
| 14AT39-44 | 52  | 62  | 0.83 | 1.199  | 0.0487 | 0.1321 | 0.0032 | 800  | 22 | 800  | 18 | 100.0 | 800  | 18 |
| 14AT39-45 | 52  | 85  | 0.61 | 0.4758 | 0.0345 | 0.0627 | 0.0019 | 395  | 24 | 392  | 12 | 100.8 | 392  | 12 |
| 14AT39-46 | 197 | 289 | 0.68 | 0.5220 | 0.0174 | 0.0685 | 0.0015 | 427  | 12 | 427  | 9  | 99.9  | 427  | 9  |
| 14AT39-47 | 215 | 339 | 0.63 | 1.215  | 0.0211 | 0.1334 | 0.0026 | 807  | 10 | 807  | 15 | 100.0 | 807  | 15 |
| 14AT39-48 | 84  | 128 | 0.66 | 0.8243 | 0.0265 | 0.0982 | 0.0022 | 610  | 15 | 604  | 13 | 101.1 | 604  | 13 |
| 14AT39-49 | 146 | 233 | 0.63 | 0.5289 | 0.0171 | 0.0665 | 0.0014 | 431  | 11 | 415  | 9  | 103.8 | 415  | 9  |
| 14AT39-50 | 153 | 415 | 0.37 | 4.521  | 0.0535 | 0.3092 | 0.0059 | 1735 | 10 | 1737 | 29 | 99.9  | 1737 | 29 |
| 14AT39-51 | 176 | 101 | 1.73 | 0.5097 | 0.0315 | 0.0666 | 0.0019 | 418  | 21 | 416  | 11 | 100.7 | 416  | 11 |
| 14AT39-52 | 192 | 294 | 0.65 | 1.589  | 0.0287 | 0.1617 | 0.0032 | 966  | 11 | 966  | 18 | 100.0 | 966  | 18 |
| 14AT39-53 | 178 | 383 | 0.47 | 1.544  | 0.0245 | 0.1588 | 0.0031 | 948  | 10 | 950  | 17 | 99.8  | 950  | 17 |
| 14AT39-54 | 218 | 379 | 0.58 | 1.248  | 0.0250 | 0.1348 | 0.0027 | 823  | 11 | 815  | 15 | 100.9 | 815  | 15 |
| 14AT39-55 | 66  | 160 | 0.41 | 0.5666 | 0.0257 | 0.0723 | 0.0018 | 456  | 17 | 450  | 11 | 101.2 | 450  | 11 |
| 14AT39-56 | 124 | 212 | 0.59 | 0.4975 | 0.0159 | 0.0666 | 0.0014 | 410  | 11 | 416  | 9  | 98.6  | 416  | 9  |
| 14AT39-57 | 92  | 132 | 0.70 | 0.5556 | 0.0205 | 0.0711 | 0.0016 | 449  | 13 | 443  | 10 | 101.4 | 443  | 10 |
| 14AT39-58 | 285 | 383 | 0.74 | 0.4698 | 0.0183 | 0.0603 | 0.0014 | 391  | 13 | 378  | 8  | 103.6 | 378  | 8  |
| 14AT39-59 | 176 | 387 | 0.45 | 1.611  | 0.0268 | 0.1631 | 0.0032 | 975  | 10 | 974  | 18 | 100.1 | 974  | 18 |
| 14AT39-60 | 134 | 173 | 0.78 | 1.165  | 0.0299 | 0.1290 | 0.0027 | 784  | 14 | 782  | 15 | 100.3 | 782  | 15 |
| 14AT39-61 | 208 | 253 | 0.82 | 0.4815 | 0.0185 | 0.0635 | 0.0014 | 399  | 13 | 397  | 9  | 100.6 | 397  | 9  |
| 14AT39-62 | 131 | 226 | 0.58 | 0.5213 | 0.0177 | 0.0682 | 0.0015 | 426  | 12 | 425  | 9  | 100.2 | 425  | 9  |
| 14AT39-63 | 35  | 104 | 0.34 | 0.5833 | 0.0316 | 0.0744 | 0.0020 | 467  | 20 | 462  | 12 | 100.9 | 462  | 12 |
| 14AT39-64 | 706 | 440 | 1.61 | 0.8744 | 0.0177 | 0.1038 | 0.0021 | 638  | 10 | 637  | 12 | 100.2 | 637  | 12 |
| 14AT39-65 | 162 | 222 | 0.73 | 0.5307 | 0.0203 | 0.0690 | 0.0016 | 432  | 13 | 430  | 9  | 100.4 | 430  | 9  |
| 14AT39-66 | 117 | 243 | 0.48 | 0.5206 | 0.0173 | 0.0676 | 0.0015 | 426  | 12 | 422  | 9  | 100.9 | 422  | 9  |
| 14AT39-67 | 120 | 675 | 0.18 | 1.516  | 0.0267 | 0.1538 | 0.0030 | 937  | 11 | 922  | 17 | 101.6 | 922  | 17 |
| 14AT39-68 | 144 | 402 | 0.36 | 2.081  | 0.0317 | 0.1939 | 0.0038 | 1143 | 10 | 1142 | 20 | 100.0 | 1142 | 20 |
| 14AT39-69 | 274 | 336 | 0.81 | 1.574  | 0.0263 | 0.1615 | 0.0032 | 960  | 10 | 965  | 18 | 99.5  | 965  | 18 |
| 14AT39-70 | 169 | 228 | 0.74 | 0.5309 | 0.0161 | 0.0696 | 0.0015 | 432  | 11 | 434  | 9  | 99.7  | 434  | 9  |
| 14AT39-71 | 70  | 146 | 0.47 | 0.4885 | 0.0240 | 0.0640 | 0.0016 | 404  | 16 | 400  | 10 | 101.0 | 400  | 10 |

|           |      |      |      |        |        |        |        |     |    |     |    |       |     |    |
|-----------|------|------|------|--------|--------|--------|--------|-----|----|-----|----|-------|-----|----|
| 14AT40-9  | 628  | 552  | 1.14 | 0.4773 | 0.0130 | 0.0612 | 0.0013 | 396 | 9  | 383 | 8  | 103.4 | 383 | 8  |
| 14AT40-10 | 767  | 1119 | 0.69 | 0.4604 | 0.0112 | 0.0582 | 0.0012 | 385 | 8  | 365 | 7  | 105.4 | 365 | 7  |
| 14AT40-11 | 166  | 148  | 1.12 | 0.4503 | 0.0264 | 0.0605 | 0.0017 | 378 | 18 | 379 | 10 | 99.6  | 379 | 10 |
| 14AT40-12 | 331  | 301  | 1.10 | 0.5016 | 0.0136 | 0.0661 | 0.0014 | 413 | 9  | 413 | 8  | 100.0 | 413 | 8  |
| 14AT40-13 | 606  | 542  | 1.12 | 0.4696 | 0.0102 | 0.0630 | 0.0013 | 391 | 7  | 394 | 8  | 99.3  | 394 | 8  |
| 14AT40-14 | 1672 | 847  | 1.97 | 0.4811 | 0.0089 | 0.0638 | 0.0013 | 399 | 6  | 398 | 8  | 100.1 | 398 | 8  |

Sample 14AT46, schist, northern Atbashi Range, Atabashi HP-LT belt, (Sang et al., 2017, Journal of Asian Earth Sciences)

|           |     |     |      |        |        |        |        |      |    |      |    |       |      |    |
|-----------|-----|-----|------|--------|--------|--------|--------|------|----|------|----|-------|------|----|
| 14AT46-1  | 91  | 192 | 0.47 | 0.5744 | 0.0175 | 0.0723 | 0.0017 | 461  | 11 | 450  | 10 | 102.4 | 450  | 10 |
| 14AT46-2  | 302 | 549 | 0.55 | 0.5402 | 0.0151 | 0.0706 | 0.0016 | 439  | 10 | 440  | 10 | 99.7  | 440  | 10 |
| 14AT46-3  | 130 | 241 | 0.54 | 0.4911 | 0.0147 | 0.0653 | 0.0015 | 406  | 10 | 408  | 9  | 99.4  | 408  | 9  |
| 14AT46-4  | 185 | 437 | 0.42 | 0.5624 | 0.0130 | 0.0736 | 0.0017 | 453  | 8  | 458  | 10 | 99.0  | 458  | 10 |
| 14AT46-5  | 67  | 469 | 0.14 | 3.968  | 0.0484 | 0.2828 | 0.0061 | 1628 | 10 | 1605 | 30 | 101.4 | 1605 | 30 |
| 14AT46-6  | 156 | 259 | 0.60 | 0.4952 | 0.0138 | 0.0649 | 0.0015 | 408  | 9  | 405  | 9  | 100.8 | 405  | 9  |
| 14AT46-7  | 202 | 323 | 0.62 | 0.5331 | 0.0119 | 0.0694 | 0.0015 | 434  | 8  | 433  | 9  | 100.3 | 433  | 9  |
| 14AT46-8  | 76  | 493 | 0.15 | 3.780  | 0.0456 | 0.2793 | 0.0060 | 1588 | 10 | 1588 | 30 | 100.0 | 1588 | 30 |
| 14AT46-9  | 175 | 340 | 0.52 | 0.5040 | 0.0133 | 0.0661 | 0.0015 | 414  | 9  | 413  | 9  | 100.4 | 413  | 9  |
| 14AT46-10 | 159 | 578 | 0.28 | 3.088  | 0.0374 | 0.2484 | 0.0053 | 1430 | 9  | 1430 | 27 | 100.0 | 1430 | 27 |
| 14AT46-11 | 50  | 435 | 0.12 | 1.217  | 0.0179 | 0.1334 | 0.0029 | 808  | 8  | 807  | 16 | 100.1 | 807  | 16 |
| 14AT46-12 | 232 | 330 | 0.70 | 0.5066 | 0.0147 | 0.0654 | 0.0015 | 416  | 10 | 408  | 9  | 102.0 | 408  | 9  |
| 14AT46-13 | 98  | 176 | 0.56 | 0.5485 | 0.0157 | 0.0716 | 0.0016 | 444  | 10 | 446  | 10 | 99.7  | 446  | 10 |
| 14AT46-14 | 114 | 169 | 0.67 | 0.5073 | 0.0167 | 0.0668 | 0.0016 | 417  | 11 | 417  | 9  | 100.0 | 417  | 9  |
| 14AT46-15 | 113 | 218 | 0.52 | 0.5205 | 0.0211 | 0.0660 | 0.0017 | 426  | 14 | 412  | 10 | 103.3 | 412  | 10 |
| 14AT46-16 | 67  | 652 | 0.10 | 0.8578 | 0.0129 | 0.1039 | 0.0022 | 629  | 7  | 637  | 13 | 98.7  | 637  | 13 |
| 14AT46-17 | 85  | 102 | 0.83 | 0.5359 | 0.0212 | 0.0699 | 0.0017 | 436  | 14 | 436  | 10 | 100.0 | 436  | 10 |
| 14AT46-18 | 50  | 97  | 0.52 | 0.5301 | 0.0196 | 0.0693 | 0.0017 | 432  | 13 | 432  | 10 | 100.0 | 432  | 10 |
| 14AT46-19 | 107 | 128 | 0.84 | 0.5352 | 0.0159 | 0.0711 | 0.0016 | 435  | 11 | 443  | 10 | 98.3  | 443  | 10 |
| 14AT46-20 | 93  | 174 | 0.54 | 0.5251 | 0.0174 | 0.0671 | 0.0016 | 429  | 12 | 419  | 10 | 102.4 | 419  | 10 |
| 14AT46-21 | 83  | 110 | 0.75 | 0.4916 | 0.0185 | 0.0648 | 0.0016 | 406  | 13 | 405  | 10 | 100.3 | 405  | 10 |
| 14AT46-22 | 23  | 74  | 0.30 | 1.815  | 0.0635 | 0.1752 | 0.0045 | 1051 | 23 | 1041 | 25 | 101.0 | 1041 | 25 |
| 14AT46-23 | 509 | 629 | 0.81 | 0.5590 | 0.0092 | 0.0721 | 0.0015 | 451  | 6  | 449  | 9  | 100.5 | 449  | 9  |
| 14AT46-24 | 60  | 96  | 0.63 | 0.5496 | 0.0224 | 0.0687 | 0.0017 | 445  | 15 | 428  | 10 | 103.8 | 428  | 10 |
| 14AT46-25 | 59  | 176 | 0.33 | 0.5098 | 0.0162 | 0.0691 | 0.0016 | 418  | 11 | 431  | 10 | 97.2  | 431  | 10 |
| 14AT46-26 | 202 | 305 | 0.66 | 0.5358 | 0.0121 | 0.0697 | 0.0015 | 436  | 8  | 434  | 9  | 100.3 | 434  | 9  |
| 14AT46-27 | 143 | 208 | 0.69 | 0.4950 | 0.0145 | 0.0647 | 0.0015 | 408  | 10 | 404  | 9  | 101.0 | 404  | 9  |
| 14AT46-28 | 24  | 71  | 0.34 | 6.012  | 0.0986 | 0.3575 | 0.0080 | 1978 | 14 | 1970 | 38 | 100.4 | 1970 | 38 |
| 14AT46-29 | 152 | 240 | 0.63 | 0.5263 | 0.0153 | 0.0688 | 0.0016 | 431  | 10 | 429  | 9  | 100.4 | 429  | 9  |
| 14AT46-30 | 93  | 167 | 0.56 | 0.5020 | 0.0209 | 0.0660 | 0.0017 | 413  | 14 | 412  | 10 | 100.2 | 412  | 10 |
| 14AT46-31 | 76  | 197 | 0.39 | 5.184  | 0.0695 | 0.3319 | 0.0071 | 1850 | 11 | 1848 | 34 | 100.1 | 1848 | 34 |
| 14AT46-32 | 277 | 114 | 2.42 | 0.7246 | 0.0208 | 0.0910 | 0.0021 | 553  | 12 | 562  | 12 | 98.6  | 562  | 12 |
| 14AT46-33 | 381 | 910 | 0.42 | 0.5671 | 0.0084 | 0.0725 | 0.0015 | 456  | 5  | 451  | 9  | 101.1 | 451  | 9  |
| 14AT46-34 | 265 | 300 | 0.88 | 0.5395 | 0.0118 | 0.0695 | 0.0015 | 438  | 8  | 433  | 9  | 101.1 | 433  | 9  |
| 14AT46-35 | 205 | 360 | 0.57 | 0.5269 | 0.0117 | 0.0666 | 0.0015 | 430  | 8  | 416  | 9  | 103.3 | 416  | 9  |
| 14AT46-36 | 97  | 211 | 0.46 | 0.4908 | 0.0222 | 0.0648 | 0.0017 | 406  | 15 | 405  | 10 | 100.2 | 405  | 10 |
| 14AT46-37 | 70  | 122 | 0.57 | 0.5490 | 0.0172 | 0.0720 | 0.0017 | 444  | 11 | 448  | 10 | 99.2  | 448  | 10 |
| 14AT46-38 | 85  | 188 | 0.45 | 0.5457 | 0.0151 | 0.0704 | 0.0016 | 442  | 10 | 439  | 10 | 100.8 | 439  | 10 |
| 14AT46-39 | 111 | 262 | 0.43 | 0.5297 | 0.0123 | 0.0714 | 0.0016 | 432  | 8  | 445  | 9  | 97.1  | 445  | 9  |
| 14AT46-40 | 380 | 549 | 0.69 | 0.4964 | 0.0098 | 0.0644 | 0.0014 | 409  | 7  | 402  | 8  | 101.8 | 402  | 8  |
| 14AT46-41 | 194 | 242 | 0.80 | 0.4839 | 0.0131 | 0.0625 | 0.0014 | 401  | 9  | 391  | 9  | 102.6 | 391  | 9  |
| 14AT46-42 | 225 | 300 | 0.75 | 0.5163 | 0.0120 | 0.0671 | 0.0015 | 423  | 8  | 419  | 9  | 100.9 | 419  | 9  |
| 14AT46-43 | 448 | 441 | 1.02 | 3.106  | 0.0388 | 0.2493 | 0.0052 | 1434 | 10 | 1435 | 27 | 100.0 | 1435 | 27 |
| 14AT46-44 | 246 | 355 | 0.69 | 0.5475 | 0.0111 | 0.0695 | 0.0015 | 443  | 7  | 433  | 9  | 102.4 | 433  | 9  |
| 14AT46-45 | 270 | 593 | 0.46 | 0.5265 | 0.0090 | 0.0682 | 0.0015 | 430  | 6  | 425  | 9  | 101.0 | 425  | 9  |
| 14AT46-46 | 447 | 436 | 1.02 | 0.5162 | 0.0099 | 0.0678 | 0.0015 | 423  | 7  | 423  | 9  | 100.0 | 423  | 9  |
| 14AT46-47 | 126 | 237 | 0.53 | 0.5252 | 0.0129 | 0.0689 | 0.0015 | 429  | 9  | 430  | 9  | 99.7  | 430  | 9  |

Sample 14AT57, schist, northern Atbashi Range, Atabashi HP-LT belt, (Sang et al., 2017, Journal of Asian Earth Sciences)

|           |     |      |      |        |        |        |        |      |    |      |    |       |      |    |
|-----------|-----|------|------|--------|--------|--------|--------|------|----|------|----|-------|------|----|
| 14AT57-1  | 120 | 228  | 0.53 | 0.5501 | 0.0156 | 0.0695 | 0.0015 | 445  | 10 | 433  | 9  | 102.7 | 433  | 9  |
| 14AT57-2  | 212 | 278  | 0.76 | 1.385  | 0.0245 | 0.1496 | 0.0029 | 883  | 10 | 899  | 16 | 98.2  | 899  | 16 |
| 14AT57-3  | 117 | 213  | 0.55 | 0.5828 | 0.0180 | 0.0736 | 0.0016 | 466  | 12 | 458  | 9  | 101.9 | 458  | 9  |
| 14AT57-4  | 251 | 312  | 0.81 | 0.5385 | 0.0132 | 0.0705 | 0.0014 | 437  | 9  | 439  | 9  | 99.7  | 439  | 9  |
| 14AT57-5  | 225 | 241  | 0.93 | 0.4960 | 0.0143 | 0.0624 | 0.0013 | 409  | 10 | 390  | 8  | 104.9 | 390  | 8  |
| 14AT57-6  | 69  | 149  | 0.46 | 0.4790 | 0.0185 | 0.0635 | 0.0014 | 397  | 13 | 397  | 9  | 100.1 | 397  | 9  |
| 14AT57-7  | 507 | 609  | 0.83 | 0.4704 | 0.0096 | 0.0635 | 0.0012 | 391  | 7  | 397  | 8  | 98.7  | 397  | 8  |
| 14AT57-8  | 211 | 401  | 0.53 | 0.5248 | 0.0122 | 0.0702 | 0.0014 | 428  | 8  | 437  | 8  | 97.9  | 437  | 8  |
| 14AT57-9  | 221 | 360  | 0.61 | 0.4599 | 0.0113 | 0.0626 | 0.0013 | 384  | 8  | 391  | 8  | 98.2  | 391  | 8  |
| 14AT57-10 | 215 | 543  | 0.40 | 1.957  | 0.0246 | 0.1878 | 0.0036 | 1101 | 8  | 1109 | 19 | 99.2  | 1109 | 19 |
| 14AT57-11 | 192 | 409  | 0.47 | 0.5132 | 0.0120 | 0.0691 | 0.0014 | 421  | 8  | 431  | 8  | 97.6  | 431  | 8  |
| 14AT57-12 | 65  | 138  | 0.47 | 0.5222 | 0.0209 | 0.0691 | 0.0016 | 427  | 14 | 431  | 10 | 99.0  | 431  | 10 |
| 14AT57-13 | 312 | 351  | 0.89 | 0.4834 | 0.0129 | 0.0644 | 0.0013 | 400  | 9  | 403  | 8  | 99.5  | 403  | 8  |
| 14AT57-14 | 743 | 619  | 1.20 | 0.5150 | 0.0116 | 0.0685 | 0.0014 | 422  | 8  | 427  | 8  | 98.7  | 427  | 8  |
| 14AT57-15 | 88  | 185  | 0.48 | 0.4929 | 0.0188 | 0.0661 | 0.0015 | 407  | 13 | 413  | 9  | 98.5  | 413  | 9  |
| 14AT57-16 | 112 | 146  | 0.77 | 10.149 | 0.1320 | 0.4599 | 0.0091 | 2448 | 12 | 2439 | 40 | 100.4 | 2439 | 40 |
| 14AT57-17 | 62  | 122  | 0.51 | 0.4876 | 0.0236 | 0.0655 | 0.0016 | 403  | 16 | 409  | 10 | 98.6  | 409  | 10 |
| 14AT57-18 | 136 | 250  | 0.54 | 0.4718 | 0.0149 | 0.0632 | 0.0013 | 392  | 10 | 395  | 8  | 99.4  | 395  | 8  |
| 14AT57-19 | 241 | 343  | 0.70 | 0.5187 | 0.0138 | 0.0682 | 0.0014 | 424  | 9  | 425  | 8  | 99.8  | 425  | 8  |
| 14AT57-20 | 177 | 281  | 0.63 | 0.4501 | 0.0141 | 0.0603 | 0.0013 | 377  | 10 | 378  | 8  | 99.9  | 378  | 8  |
| 14AT57-21 | 319 | 412  | 0.77 | 0.4986 | 0.0119 | 0.0627 | 0.0013 | 411  | 8  | 392  | 8  | 104.9 | 392  | 8  |
| 14AT57-22 | 238 | 285  | 0.84 | 0.4995 | 0.0197 | 0.0619 | 0.0014 | 411  | 13 | 387  | 9  | 106.3 | 387  | 9  |
| 14AT57-23 | 161 | 203  | 0.79 | 0.4871 | 0.0165 | 0.0641 | 0.0014 | 403  | 11 | 400  | 8  | 100.6 | 400  | 8  |
| 14AT57-24 | 259 | 570  | 0.45 | 1.316  | 0.0190 | 0.1416 | 0.0027 | 853  | 8  | 854  | 15 | 99.9  | 854  | 15 |
| 14AT57-25 | 125 | 263  | 0.47 | 0.4900 | 0.0149 | 0.0649 | 0.0014 | 405  | 10 | 405  | 8  | 100.0 | 405  | 8  |
| 14AT57-26 | 163 | 160  | 1.02 | 0.4713 | 0.0189 | 0.0607 | 0.0014 | 392  | 13 | 380  | 8  | 103.2 | 380  | 8  |
| 14AT57-27 | 218 | 157  | 1.39 | 1.632  | 0.0381 | 0.1648 | 0.0034 | 982  | 15 | 983  | 19 | 99.9  | 983  | 19 |
| 14AT57-28 | 333 | 504  | 0.66 | 0.5216 | 0.0118 | 0.0683 | 0.0014 | 426  | 8  | 426  | 8  | 100.1 | 426  | 8  |
| 14AT57-29 | 98  | 168  | 0.58 | 0.4788 | 0.0176 | 0.0623 | 0.0014 | 397  | 12 | 390  | 8  | 102.0 | 390  | 8  |
| 14AT57-30 | 218 | 333  | 0.66 | 0.5287 | 0.0134 | 0.0702 | 0.0014 | 431  | 9  | 437  | 9  | 98.6  | 437  | 9  |
| 14AT57-31 | 43  | 106  | 0.40 | 0.4837 | 0.0233 | 0.0636 | 0.0015 | 401  | 16 | 397  | 9  | 100.9 | 397  | 9  |
| 14AT57-32 | 135 | 224  | 0.60 | 0.5080 | 0.0155 | 0.0689 | 0.0014 | 417  | 10 | 430  | 9  | 97.1  | 430  | 9  |
| 14AT57-33 | 180 | 335  | 0.54 | 0.5324 | 0.0143 | 0.0698 | 0.0014 | 433  | 9  | 435  | 9  | 99.7  | 435  | 9  |
| 14AT57-34 | 126 | 140  | 0.90 | 2.004  | 0.0424 | 0.1899 | 0.0039 | 1117 | 14 | 1121 | 21 | 99.6  | 1121 | 21 |
| 14AT57-35 | 115 | 364  | 0.32 | 0.5034 | 0.0135 | 0.0659 | 0.0014 | 414  | 9  | 412  | 8  | 100.6 | 412  | 8  |
| 14AT57-36 | 132 | 1200 | 0.11 | 1.144  | 0.0140 | 0.1221 | 0.0023 | 774  | 7  | 743  | 13 | 104.2 | 743  | 13 |
| 14AT57-37 | 145 | 289  | 0.50 | 0.5465 | 0.0149 | 0.0704 | 0.0015 | 443  | 10 | 439  | 9  | 100.9 | 439  | 9  |
| 14AT57-38 | 64  | 215  | 0.30 | 0.5258 | 0.0181 | 0.0689 | 0.0015 | 429  | 12 | 429  | 9  | 99.9  | 429  | 9  |
| 14AT57-39 | 285 | 317  | 0.90 | 1.570  | 0.0276 | 0.1592 | 0.0031 | 959  | 11 | 952  | 17 | 100.7 | 952  | 17 |
| 14AT57-40 | 176 | 236  | 0.75 | 0.5146 | 0.0164 | 0.0677 | 0.0014 | 422  | 11 | 422  | 9  | 99.8  | 422  | 9  |
| 14AT57-41 | 141 | 259  | 0.54 | 1.274  | 0.0252 | 0.1383 | 0.0027 | 834  | 11 | 835  | 16 | 99.9  | 835  | 16 |
| 14AT57-42 | 111 | 204  | 0.54 | 10.299 | 0.1239 | 0.4644 | 0.0090 | 2462 | 11 | 2459 | 39 | 100.1 | 2459 | 39 |
| 14AT57-43 | 205 | 257  | 0.80 | 1.198  | 0.0235 | 0.1323 | 0.0026 | 800  | 11 | 801  | 15 | 99.9  | 801  | 15 |
| 14AT57-44 | 50  | 117  | 0.43 | 0.4783 | 0.0209 | 0.0620 | 0.0014 | 397  | 14 | 388  | 9  | 102.3 | 388  | 9  |
| 14AT57-45 | 423 | 665  | 0.64 | 0.5713 | 0.0101 | 0.0727 | 0.0014 | 459  | 7  | 453  | 8  | 101.4 | 453  | 8  |
| 14AT57-46 | 113 | 196  | 0.58 | 0.5329 | 0.0164 | 0.0698 | 0.0015 | 434  | 11 | 435  | 9  | 99.7  | 435  | 9  |
| 14AT57-47 | 167 | 342  | 0.49 | 0.4868 | 0.0124 | 0.0652 | 0.0013 | 403  | 8  | 407  | 8  | 98.9  | 407  | 8  |
| 14AT57-48 | 289 | 440  | 0.66 | 0.4927 | 0.0108 | 0.0620 | 0.0012 | 407  | 7  | 388  | 7  | 104.9 | 388  | 7  |
| 14AT57-49 | 59  | 480  | 0.12 | 3.546  | 0.0447 | 0.2690 | 0.0051 | 1538 | 10 | 1536 | 26 | 100.1 | 1536 | 26 |
| 14AT57-50 | 49  | 98   | 0.50 | 0.5299 | 0.0227 | 0.0704 | 0.0016 | 432  | 15 | 439  | 10 | 98.4  | 439  | 10 |
| 14AT57-51 | 110 | 240  | 0.46 | 0.4747 | 0.0147 | 0.0614 | 0.0013 | 394  | 10 | 384  | 8  | 102.7 | 384  | 8  |
| 14AT57-52 | 98  | 153  | 0.64 | 10.670 | 0.1345 | 0.4733 | 0.0092 | 2495 | 12 | 2498 | 40 | 99.9  | 2498 | 40 |
| 14AT57-53 | 161 | 183  | 0.88 | 1.163  | 0.0284 | 0.1293 | 0.0027 | 783  | 13 | 784  | 15 | 99.9  | 784  | 15 |
| 14AT57-54 | 78  | 144  | 0.54 | 0.4958 | 0.0204 | 0.0654 | 0.0015 | 409  | 14 | 408  | 9  | 100.2 | 408  | 9  |
| 14AT57-55 | 81  | 145  | 0.56 | 0.4986 | 0.0204 | 0.0655 | 0.0015 | 411  | 14 | 409  | 9  | 100.4 | 409  | 9  |
| 14AT57-56 | 127 | 330  | 0.39 | 0.4665 | 0.0129 | 0.0607 | 0.0012 | 389  | 9  | 380  | 8  | 102.3 | 380  | 8  |
| 14AT57-57 | 232 | 286  | 0.81 | 0.4839 | 0.0146 | 0.0643 | 0.0013 | 401  | 10 | 402  | 8  | 99.8  | 402  | 8  |
| 14AT57-58 | 495 | 790  | 0.63 | 0.5161 | 0.0093 | 0.0666 | 0.0013 | 423  | 6  | 416  | 8  | 101.6 | 416  | 8  |
| 14AT57-59 | 148 | 242  | 0.61 | 2.039  | 0.0387 | 0.1896 | 0.0038 | 1129 | 13 | 1119 | 20 | 100.8 | 1119 | 20 |
| 14AT57-60 | 112 | 65   | 1.72 | 1.048  | 0.0517 | 0.1165 | 0.0030 | 728  | 26 | 710  | 17 | 102.5 | 710  | 17 |
| 14AT57-61 | 65  | 164  | 0.40 | 0.4833 | 0.0192 | 0.0642 | 0.0015 | 400  | 13 | 401  | 9  | 99.8  | 401  | 9  |



**Sample 14AT58, greywacke, northern Atbashi Range, Atabashi HP-LT belt, (Sang et al., 2017, Journal of Asian Earth Sciences)**

|           |      |      |      |        |        |        |        |      |    |      |    |       |      |    |
|-----------|------|------|------|--------|--------|--------|--------|------|----|------|----|-------|------|----|
| 14AT58-1  | 779  | 1363 | 0.57 | 0.5689 | 0.0146 | 0.0756 | 0.0011 | 457  | 9  | 470  | 6  | 97.3  | 470  | 6  |
| 14AT58-2  | 653  | 1050 | 0.62 | 0.4323 | 0.0146 | 0.0564 | 0.0008 | 365  | 10 | 354  | 5  | 103.2 | 354  | 5  |
| 14AT58-3  | 401  | 510  | 0.79 | 0.6493 | 0.0182 | 0.0818 | 0.0014 | 508  | 11 | 507  | 8  | 100.3 | 507  | 8  |
| 14AT58-4  | 596  | 735  | 0.81 | 0.8172 | 0.0364 | 0.1018 | 0.0018 | 606  | 20 | 625  | 11 | 97.0  | 625  | 11 |
| 14AT58-5  | 1543 | 1837 | 0.84 | 0.4710 | 0.0112 | 0.0658 | 0.0009 | 392  | 8  | 411  | 6  | 95.4  | 411  | 6  |
| 14AT58-6  | 883  | 1134 | 0.78 | 0.4649 | 0.0133 | 0.0608 | 0.0012 | 388  | 9  | 381  | 7  | 101.8 | 381  | 7  |
| 14AT58-7  | 432  | 1316 | 0.33 | 0.3895 | 0.0099 | 0.0535 | 0.0008 | 334  | 7  | 336  | 5  | 99.4  | 336  | 5  |
| 14AT58-8  | 538  | 1649 | 0.33 | 0.5602 | 0.0143 | 0.0726 | 0.0013 | 452  | 9  | 452  | 8  | 100.0 | 452  | 8  |
| 14AT58-9  | 143  | 303  | 0.47 | 0.8875 | 0.0265 | 0.1032 | 0.0016 | 645  | 14 | 633  | 10 | 101.9 | 633  | 10 |
| 14AT58-10 | 160  | 277  | 0.58 | 1.647  | 0.0625 | 0.1659 | 0.0035 | 988  | 24 | 989  | 20 | 99.9  | 989  | 20 |
| 14AT58-11 | 1303 | 1599 | 0.81 | 0.3826 | 0.0097 | 0.0522 | 0.0009 | 329  | 7  | 328  | 6  | 100.3 | 328  | 6  |
| 14AT58-12 | 1339 | 2259 | 0.59 | 0.3437 | 0.0081 | 0.0468 | 0.0007 | 300  | 6  | 295  | 5  | 101.7 | 295  | 5  |
| 14AT58-13 | 287  | 619  | 0.46 | 0.3337 | 0.0110 | 0.0474 | 0.0009 | 292  | 8  | 298  | 5  | 98.0  | 298  | 5  |
| 14AT58-14 | 461  | 419  | 1.10 | 0.5966 | 0.0176 | 0.0758 | 0.0013 | 475  | 11 | 471  | 8  | 100.8 | 471  | 8  |
| 14AT58-15 | 1456 | 2552 | 0.57 | 0.3417 | 0.0071 | 0.0467 | 0.0009 | 298  | 5  | 294  | 5  | 101.5 | 294  | 5  |
| 14AT58-16 | 1648 | 2896 | 0.57 | 0.3401 | 0.0067 | 0.0475 | 0.0008 | 297  | 5  | 299  | 5  | 99.4  | 299  | 5  |
| 14AT58-17 | 221  | 218  | 1.01 | 0.7786 | 0.0304 | 0.0946 | 0.0015 | 585  | 17 | 583  | 9  | 100.4 | 583  | 9  |
| 14AT58-18 | 1209 | 1243 | 0.97 | 1.334  | 0.0252 | 0.1441 | 0.0014 | 861  | 11 | 868  | 8  | 99.1  | 868  | 8  |
| 14AT58-19 | 523  | 763  | 0.69 | 0.5469 | 0.0155 | 0.0710 | 0.0011 | 443  | 10 | 442  | 7  | 100.1 | 442  | 7  |
| 14AT58-20 | 560  | 529  | 1.06 | 5.213  | 0.0859 | 0.3357 | 0.0041 | 1855 | 14 | 1866 | 20 | 99.4  | 1866 | 20 |
| 14AT58-21 | 1179 | 1508 | 0.78 | 0.5365 | 0.0105 | 0.0695 | 0.0007 | 436  | 7  | 433  | 4  | 100.7 | 433  | 4  |
| 14AT58-22 | 163  | 656  | 0.25 | 2.054  | 0.0395 | 0.1937 | 0.0025 | 1134 | 13 | 1141 | 13 | 99.3  | 1141 | 13 |
| 14AT58-23 | 1372 | 1695 | 0.81 | 1.617  | 0.0275 | 0.1639 | 0.0017 | 977  | 11 | 979  | 9  | 99.8  | 979  | 9  |
| 14AT58-24 | 805  | 1292 | 0.62 | 0.6155 | 0.0145 | 0.0790 | 0.0009 | 487  | 9  | 490  | 5  | 99.3  | 490  | 5  |
| 14AT58-25 | 546  | 871  | 0.63 | 1.561  | 0.0295 | 0.1605 | 0.0020 | 955  | 12 | 960  | 11 | 99.5  | 960  | 11 |
| 14AT58-26 | 1495 | 2023 | 0.74 | 0.3667 | 0.0085 | 0.0505 | 0.0008 | 317  | 6  | 317  | 5  | 99.9  | 317  | 5  |
| 14AT58-27 | 600  | 559  | 1.07 | 0.5444 | 0.0150 | 0.0708 | 0.0009 | 441  | 10 | 441  | 6  | 100.0 | 441  | 6  |
| 14AT58-28 | 3965 | 2408 | 1.65 | 0.5169 | 0.0124 | 0.0702 | 0.0069 | 423  | 8  | 437  | 41 | 96.8  | 437  | 41 |
| 14AT58-29 | 1112 | 1177 | 0.95 | 10.237 | 0.1574 | 0.4644 | 0.0058 | 2456 | 14 | 2459 | 26 | 99.9  | 2459 | 26 |
| 14AT58-30 | 1311 | 2261 | 0.58 | 0.6137 | 0.0149 | 0.0778 | 0.0015 | 486  | 9  | 483  | 9  | 100.6 | 483  | 9  |
| 14AT58-31 | 677  | 881  | 0.77 | 4.530  | 0.0753 | 0.3080 | 0.0042 | 1737 | 14 | 1731 | 21 | 100.3 | 1731 | 21 |
| 14AT58-32 | 18   | 807  | 0.02 | 1.519  | 0.0300 | 0.1537 | 0.0021 | 938  | 12 | 922  | 12 | 101.8 | 922  | 12 |
| 14AT58-33 | 612  | 627  | 0.98 | 0.5903 | 0.0159 | 0.0760 | 0.0010 | 471  | 10 | 473  | 6  | 99.7  | 473  | 6  |
| 14AT58-34 | 295  | 602  | 0.49 | 0.5784 | 0.0153 | 0.0741 | 0.0008 | 463  | 10 | 461  | 5  | 100.6 | 461  | 5  |
| 14AT58-35 | 943  | 570  | 1.65 | 1.097  | 0.0240 | 0.1234 | 0.0015 | 752  | 12 | 750  | 9  | 100.2 | 750  | 9  |
| 14AT58-36 | 1032 | 1671 | 0.62 | 0.6190 | 0.0117 | 0.0775 | 0.0008 | 489  | 7  | 481  | 5  | 101.7 | 481  | 5  |
| 14AT58-37 | 284  | 391  | 0.73 | 10.577 | 0.1871 | 0.4670 | 0.0049 | 2487 | 17 | 2471 | 21 | 100.7 | 2471 | 21 |
| 14AT58-38 | 676  | 734  | 0.92 | 0.5763 | 0.0151 | 0.0724 | 0.0009 | 462  | 10 | 450  | 6  | 102.6 | 450  | 6  |
| 14AT58-39 | 120  | 773  | 0.16 | 1.727  | 0.0363 | 0.1705 | 0.0019 | 1019 | 14 | 1015 | 10 | 100.4 | 1015 | 10 |
| 14AT58-40 | 472  | 984  | 0.48 | 0.5896 | 0.0129 | 0.0757 | 0.0009 | 471  | 8  | 470  | 5  | 100.1 | 470  | 5  |
| 14AT58-41 | 1887 | 2490 | 0.76 | 1.711  | 0.0267 | 0.1699 | 0.0020 | 1013 | 10 | 1012 | 11 | 100.1 | 1012 | 11 |
| 14AT58-42 | 484  | 279  | 1.73 | 0.3499 | 0.0167 | 0.0486 | 0.0008 | 305  | 13 | 306  | 5  | 99.6  | 306  | 5  |
| 14AT58-43 | 283  | 1006 | 0.28 | 2.762  | 0.0610 | 0.2355 | 0.0041 | 1345 | 16 | 1363 | 21 | 98.7  | 1363 | 21 |
| 14AT58-44 | 413  | 778  | 0.53 | 0.3353 | 0.0100 | 0.0473 | 0.0006 | 294  | 8  | 298  | 4  | 98.5  | 298  | 4  |
| 14AT58-45 | 505  | 706  | 0.72 | 11.387 | 0.2141 | 0.4867 | 0.0063 | 2555 | 18 | 2557 | 27 | 100.0 | 2557 | 27 |
| 14AT58-46 | 625  | 1165 | 0.54 | 1.824  | 0.0388 | 0.1783 | 0.0022 | 1054 | 14 | 1058 | 12 | 99.7  | 1058 | 12 |
| 14AT58-47 | 59   | 199  | 0.30 | 1.849  | 0.0550 | 0.1788 | 0.0017 | 1063 | 20 | 1061 | 9  | 100.2 | 1061 | 9  |
| 14AT58-48 | 59   | 198  | 0.30 | 1.851  | 0.0518 | 0.1795 | 0.0018 | 1064 | 18 | 1064 | 10 | 100.0 | 1064 | 10 |
| 14AT58-49 | 1563 | 230  | 6.78 | 9.838  | 0.2120 | 0.4540 | 0.0065 | 2420 | 20 | 2413 | 29 | 100.3 | 2413 | 29 |
| 14AT58-50 | 1812 | 2034 | 0.89 | 0.3099 | 0.0082 | 0.0418 | 0.0006 | 274  | 6  | 264  | 4  | 103.7 | 264  | 4  |
| 14AT58-51 | 167  | 1491 | 0.11 | 3.732  | 0.0632 | 0.2780 | 0.0032 | 1578 | 14 | 1581 | 16 | 99.8  | 1581 | 16 |
| 14AT58-52 | 154  | 304  | 0.51 | 1.862  | 0.0444 | 0.1804 | 0.0017 | 1068 | 16 | 1069 | 9  | 99.9  | 1069 | 9  |

**Sample 14AT70, schist, northern Atbashi Range, Atabashi HP-LT belt, (Sang et al., 2017, Journal of Asian Earth Sciences)**

|           |     |     |      |        |        |        |        |      |    |      |    |       |      |    |
|-----------|-----|-----|------|--------|--------|--------|--------|------|----|------|----|-------|------|----|
| 14AT70-1  | 72  | 153 | 0.47 | 0.6217 | 0.0175 | 0.0781 | 0.0017 | 491  | 11 | 485  | 10 | 101.3 | 485  | 10 |
| 14AT70-2  | 74  | 84  | 0.89 | 1.302  | 0.0460 | 0.1379 | 0.0033 | 847  | 20 | 833  | 19 | 101.6 | 833  | 19 |
| 14AT70-3  | 847 | 776 | 1.09 | 0.5748 | 0.0134 | 0.0729 | 0.0016 | 461  | 9  | 454  | 9  | 101.6 | 454  | 9  |
| 14AT70-4  | 48  | 61  | 0.78 | 1.300  | 0.0427 | 0.1393 | 0.0033 | 846  | 19 | 841  | 18 | 100.6 | 841  | 18 |
| 14AT70-5  | 46  | 102 | 0.45 | 14.305 | 0.1703 | 0.5367 | 0.0110 | 2770 | 11 | 2769 | 46 | 100.0 | 2769 | 46 |
| 14AT70-6  | 57  | 44  | 1.28 | 10.899 | 0.1635 | 0.4770 | 0.0102 | 2515 | 14 | 2514 | 44 | 100.0 | 2514 | 44 |
| 14AT70-7  | 102 | 221 | 0.46 | 0.5853 | 0.0146 | 0.0744 | 0.0016 | 468  | 9  | 463  | 10 | 101.1 | 463  | 10 |
| 14AT70-8  | 88  | 188 | 0.47 | 0.5943 | 0.0175 | 0.0760 | 0.0017 | 474  | 11 | 472  | 10 | 100.3 | 472  | 10 |
| 14AT70-9  | 134 | 132 | 1.02 | 0.5658 | 0.0204 | 0.0727 | 0.0017 | 455  | 13 | 453  | 10 | 100.6 | 453  | 10 |
| 14AT70-10 | 261 | 312 | 0.84 | 0.5241 | 0.0115 | 0.0685 | 0.0014 | 428  | 8  | 427  | 9  | 100.2 | 427  | 9  |
| 14AT70-11 | 87  | 198 | 0.44 | 0.5745 | 0.0134 | 0.0739 | 0.0016 | 461  | 9  | 460  | 9  | 100.2 | 460  | 9  |
| 14AT70-12 | 95  | 115 | 0.83 | 0.5409 | 0.0246 | 0.0702 | 0.0018 | 439  | 16 | 437  | 11 | 100.4 | 437  | 11 |
| 14AT70-13 | 63  | 65  | 0.97 | 2.025  | 0.0419 | 0.1906 | 0.0041 | 1124 | 14 | 1125 | 22 | 100.0 | 1125 | 22 |
| 14AT70-14 | 240 | 109 | 2.20 | 0.7808 | 0.0224 | 0.0957 | 0.0021 | 586  | 13 | 589  | 12 | 99.4  | 589  | 12 |
| 14AT70-15 | 98  | 165 | 0.60 | 0.5506 | 0.0159 | 0.0715 | 0.0016 | 445  | 10 | 445  | 9  | 100.0 | 445  | 9  |
| 14AT70-16 | 48  | 109 | 0.44 | 0.5350 | 0.0218 | 0.0698 | 0.0017 | 435  | 14 | 435  | 10 | 100.0 | 435  | 10 |
| 14AT70-17 | 101 | 215 | 0.47 | 0.5630 | 0.0130 | 0.0728 | 0.0015 | 454  | 8  | 453  | 9  | 100.1 | 453  | 9  |
| 14AT70-18 | 71  | 40  | 1.77 | 11.061 | 0.1756 | 0.4805 | 0.0104 | 2528 | 15 | 2529 | 45 | 100.0 | 2529 | 45 |
| 14AT70-19 | 217 | 193 | 1.12 | 1.219  | 0.0223 | 0.1337 | 0.0028 | 809  | 10 | 809  | 16 | 100.1 | 809  | 16 |
| 14AT70-20 | 95  | 155 | 0.61 | 12.543 | 0.1412 | 0.5074 | 0.0102 | 2646 | 11 | 2646 | 44 | 100.0 | 2646 | 44 |
| 14AT70-21 | 57  | 153 | 0.37 | 0.5636 | 0.0204 | 0.0727 | 0.0017 | 454  | 13 | 453  | 10 | 100.3 | 453  | 10 |
| 14AT70-22 | 118 | 216 | 0.55 | 0.5444 | 0.0124 | 0.0708 | 0.0015 | 441  | 8  | 441  | 9  | 100.1 | 441  | 9  |
| 14AT70-23 | 79  | 157 | 0.50 | 0.5369 | 0.0165 | 0.0692 | 0.0015 | 436  | 11 | 431  | 9  | 101.2 | 431  | 9  |
| 14AT70-24 | 141 | 122 | 1.16 | 1.664  | 0.0511 | 0.1669 | 0.0039 | 995  | 19 | 995  | 21 | 100.0 | 995  | 21 |
| 14AT70-25 | 97  | 223 | 0.44 | 0.5441 | 0.0145 | 0.0709 | 0.0015 | 441  | 10 | 442  | 9  | 99.9  | 442  | 9  |
| 14AT70-26 | 477 | 676 | 0.71 | 0.5231 | 0.0102 | 0.0668 | 0.0014 | 427  | 7  | 417  | 8  | 102.5 | 417  | 8  |
| 14AT70-27 | 110 | 130 | 0.85 | 14.138 | 0.1714 | 0.5339 | 0.0109 | 2759 | 12 | 2758 | 46 | 100.0 | 2758 | 46 |
| 14AT70-28 | 98  | 195 | 0.50 | 10.663 | 0.1239 | 0.4725 | 0.0095 | 2494 | 11 | 2494 | 41 | 100.0 | 2494 | 41 |
| 14AT70-29 | 154 | 300 | 0.51 | 0.5120 | 0.0111 | 0.0673 | 0.0014 | 420  | 7  | 420  | 8  | 100.0 | 420  | 8  |
| 14AT70-30 | 94  | 223 | 0.42 | 1.652  | 0.0247 | 0.1663 | 0.0033 | 990  | 9  | 992  | 18 | 99.9  | 992  | 18 |
| 14AT70-31 | 81  | 154 | 0.52 | 16.590 | 0.1825 | 0.5710 | 0.0114 | 2912 | 11 | 2912 | 47 | 100.0 | 2912 | 47 |
| 14AT70-32 | 115 | 169 | 0.68 | 0.5151 | 0.0209 | 0.0672 | 0.0016 | 422  | 14 | 419  | 10 | 100.7 | 419  | 10 |
| 14AT70-33 | 133 | 288 | 0.46 | 0.5530 | 0.0129 | 0.0710 | 0.0015 | 447  | 8  | 442  | 9  | 101.1 | 442  | 9  |
| 14AT70-34 | 54  | 167 | 0.33 | 0.5545 | 0.0149 | 0.0721 | 0.0015 | 448  | 10 | 449  | 9  | 99.8  | 449  | 9  |
| 14AT70-35 | 162 | 166 | 0.98 | 0.7270 | 0.0186 | 0.0896 | 0.0019 | 555  | 11 | 553  | 11 | 100.3 | 553  | 11 |
| 14AT70-36 | 88  | 299 | 0.29 | 1.392  | 0.0378 | 0.1446 | 0.0032 | 886  | 16 | 870  | 18 | 101.8 | 870  | 18 |
| 14AT70-37 | 73  | 120 | 0.61 | 9.244  | 0.1186 | 0.4421 | 0.0090 | 2363 | 12 | 2360 | 40 | 100.1 | 2360 | 40 |
| 14AT70-38 | 91  | 138 | 0.66 | 0.5530 | 0.0229 | 0.0717 | 0.0017 | 447  | 15 | 446  | 10 | 100.2 | 446  | 10 |
| 14AT70-39 | 104 | 180 | 0.58 | 0.5263 | 0.0234 | 0.0677 | 0.0017 | 429  | 16 | 422  | 10 | 101.7 | 422  | 10 |
| 14AT70-40 | 412 | 510 | 0.81 | 0.5290 | 0.0083 | 0.0693 | 0.0014 | 431  | 6  | 432  | 8  | 99.8  | 432  | 8  |
| 14AT70-41 | 110 | 206 | 0.53 | 0.6106 | 0.0131 | 0.0778 | 0.0016 | 484  | 8  | 483  | 10 | 100.2 | 483  | 10 |
| 14AT70-42 | 39  | 105 | 0.37 | 1.456  | 0.0342 | 0.1522 | 0.0033 | 912  | 14 | 913  | 18 | 99.9  | 913  | 18 |
| 14AT70-43 | 176 | 962 | 0.18 | 1.285  | 0.0179 | 0.1381 | 0.0027 | 839  | 8  | 834  | 15 | 100.6 | 834  | 15 |
| 14AT70-44 | 130 | 246 | 0.53 | 0.5897 | 0.0171 | 0.0754 | 0.0016 | 471  | 11 | 468  | 10 | 100.5 | 468  | 10 |
| 14AT70-45 | 79  | 78  | 1.02 | 9.529  | 0.1492 | 0.4488 | 0.0095 | 2390 | 14 | 2390 | 42 | 100.0 | 2390 | 42 |
| 14AT70-46 | 63  | 42  | 1.52 | 1.511  | 0.0522 | 0.1564 | 0.0037 | 935  | 21 | 937  | 21 | 99.8  | 937  | 21 |
| 14AT70-47 | 147 | 296 | 0.50 | 0.5394 | 0.0106 | 0.0704 | 0.0014 | 438  | 7  | 438  | 9  | 99.9  | 438  | 9  |
| 14AT70-48 | 35  | 34  | 1.05 | 18.903 | 0.2758 | 0.6018 | 0.0128 | 3037 | 14 | 3037 | 52 | 100.0 | 3037 | 52 |
| 14AT70-49 | 93  | 172 | 0.54 | 0.5451 | 0.0140 | 0.0706 | 0.0015 | 442  | 9  | 440  | 9  | 100.4 | 440  | 9  |
| 14AT70-50 | 125 | 407 | 0.31 | 0.4952 | 0.0090 | 0.0656 | 0.0013 | 408  | 6  | 410  | 8  | 99.7  | 410  | 8  |
| 14AT70-51 | 130 | 963 | 0.14 | 1.427  | 0.0157 | 0.1510 | 0.0029 | 900  | 7  | 907  | 16 | 99.3  | 907  | 16 |
| 14AT70-52 | 237 | 722 | 0.33 | 0.5319 | 0.0124 | 0.0684 | 0.0014 | 433  | 8  | 426  | 9  | 101.6 | 426  | 9  |
| 14AT70-53 | 226 | 354 | 0.64 | 0.5714 | 0.0150 | 0.0736 | 0.0016 | 459  | 10 | 458  | 9  | 100.2 | 458  | 9  |
| 14AT70-54 | 65  | 409 | 0.16 | 5.966  | 0.0602 | 0.3586 | 0.0069 | 1971 | 9  | 1975 | 33 | 99.8  | 1975 | 33 |
| 14AT70-55 | 170 | 280 | 0.51 | 2.293  | 0.0331 | 0.2054 | 0.0041 | 1210 | 10 | 1204 | 22 | 100.5 | 1204 | 22 |
| 14AT70-56 | 90  | 305 | 0.29 | 1.576  | 0.0231 | 0.1622 | 0.0032 | 921  | 9  | 969  | 18 | 99.2  | 969  | 18 |
| 14AT70-57 | 101 | 238 | 0.42 | 0.5039 | 0.0149 | 0.0665 | 0.0014 | 414  | 10 | 415  | 9  | 99.8  | 415  | 9  |
| 14AT70-58 | 157 | 203 | 0.78 | 0.5303 | 0.0125 | 0.0692 | 0.0014 | 432  | 8  | 431  | 9  | 100.2 | 431  | 9  |
| 14AT70-59 | 119 | 64  | 1.88 | 0.9108 | 0.0558 | 0.1080 | 0.0033 | 658  | 30 | 661  | 19 | 99.5  | 661  | 19 |
| 14AT70-60 | 284 | 434 | 0.66 | 0.5322 | 0.0094 | 0.0695 | 0.0014 | 433  | 6  | 433  | 8  | 100.1 | 433  | 8  |
| 14AT70-61 | 142 | 193 | 0.74 | 5.052  | 0.0578 | 0.3275 | 0.0064 | 1828 | 10 | 1826 | 31 | 100.1 | 1826 | 31 |
| 14AT70-62 | 118 | 308 | 0.38 | 1.562  | 0.0202 | 0.1597 | 0.0031 | 955  | 8  | 955  | 17 | 100.0 | 955  | 17 |
| 14AT70-63 | 42  | 105 | 0.40 | 0.5252 | 0.0130 | 0.0702 | 0.0014 | 429  | 9  | 437  | 9  | 98.0  | 437  | 9  |
| 14AT70-64 | 66  | 453 | 0.14 | 11.950 | 0.1119 | 0.4962 | 0.0094 | 2601 | 9  | 2597 | 41 | 100.1 | 2597 | 41 |

|                                                                                                                            |      |      |      |        |        |        |        |      |    |      |    |       |      |    |
|----------------------------------------------------------------------------------------------------------------------------|------|------|------|--------|--------|--------|--------|------|----|------|----|-------|------|----|
| 14AT70-65                                                                                                                  | 82   | 143  | 0.57 | 0.5230 | 0.0126 | 0.0686 | 0.0014 | 427  | 8  | 428  | 9  | 99.9  | 428  | 9  |
| 14AT70-66                                                                                                                  | 164  | 345  | 0.48 | 1.357  | 0.0188 | 0.1469 | 0.0029 | 871  | 8  | 884  | 16 | 98.5  | 884  | 16 |
| 14AT70-67                                                                                                                  | 49   | 84   | 0.58 | 6.332  | 0.0805 | 0.3687 | 0.0073 | 2023 | 11 | 2023 | 34 | 100.0 | 2023 | 34 |
| 14AT70-68                                                                                                                  | 113  | 123  | 0.92 | 0.4906 | 0.0136 | 0.0650 | 0.0014 | 405  | 9  | 406  | 8  | 99.8  | 406  | 8  |
| 14AT70-69                                                                                                                  | 73   | 145  | 0.50 | 9.769  | 0.1082 | 0.4512 | 0.0088 | 2413 | 10 | 2401 | 39 | 100.5 | 2401 | 39 |
| Sample 14AT73, schist, northern Atbashi Range, Atabashi HP-LT belt, (Sang et al., 2017, Journal of Asian Earth Sciences)   |      |      |      |        |        |        |        |      |    |      |    |       |      |    |
| 14AT73-1                                                                                                                   | 848  | 526  | 1.61 | 1.416  | 0.0307 | 0.1490 | 0.0015 | 896  | 13 | 896  | 8  | 100.0 | 896  | 8  |
| 14AT73-2                                                                                                                   | 697  | 517  | 1.35 | 0.8147 | 0.0213 | 0.0976 | 0.0010 | 605  | 12 | 600  | 6  | 100.8 | 600  | 6  |
| 14AT73-3                                                                                                                   | 449  | 777  | 0.58 | 1.930  | 0.0369 | 0.1859 | 0.0018 | 1092 | 13 | 1099 | 10 | 99.3  | 1099 | 10 |
| 14AT73-4                                                                                                                   | 195  | 1780 | 0.11 | 1.599  | 0.0358 | 0.1637 | 0.0028 | 970  | 14 | 977  | 16 | 99.2  | 977  | 16 |
| 14AT73-5                                                                                                                   | 371  | 830  | 0.45 | 0.5820 | 0.0132 | 0.0752 | 0.0007 | 466  | 8  | 467  | 4  | 99.7  | 467  | 4  |
| 14AT73-6                                                                                                                   | 753  | 2601 | 0.29 | 0.8712 | 0.0139 | 0.1046 | 0.0008 | 636  | 8  | 641  | 5  | 99.2  | 641  | 5  |
| 14AT73-7                                                                                                                   | 786  | 1419 | 0.55 | 2.069  | 0.0408 | 0.1929 | 0.0024 | 1138 | 14 | 1137 | 13 | 100.1 | 1137 | 13 |
| 14AT73-8                                                                                                                   | 2715 | 3227 | 0.84 | 2.641  | 0.0410 | 0.2262 | 0.0025 | 1312 | 11 | 1315 | 13 | 99.8  | 1315 | 13 |
| 14AT73-9                                                                                                                   | 718  | 1383 | 0.52 | 0.6039 | 0.0144 | 0.0772 | 0.0008 | 480  | 9  | 480  | 5  | 100.0 | 480  | 5  |
| 14AT73-10                                                                                                                  | 502  | 884  | 0.57 | 0.5943 | 0.0163 | 0.0769 | 0.0009 | 474  | 10 | 477  | 6  | 99.2  | 477  | 6  |
| 14AT73-11                                                                                                                  | 1185 | 1270 | 0.93 | 0.6242 | 0.0124 | 0.0777 | 0.0007 | 492  | 8  | 482  | 4  | 102.1 | 482  | 4  |
| 14AT73-12                                                                                                                  | 2475 | 3535 | 0.70 | 0.6516 | 0.0119 | 0.0821 | 0.0008 | 509  | 7  | 508  | 5  | 100.2 | 508  | 5  |
| 14AT73-13                                                                                                                  | 1055 | 839  | 1.26 | 4.012  | 0.0776 | 0.2896 | 0.0031 | 1637 | 16 | 1639 | 15 | 99.8  | 1639 | 15 |
| 14AT73-14                                                                                                                  | 369  | 2289 | 0.16 | 1.752  | 0.0324 | 0.1728 | 0.0018 | 1028 | 12 | 1028 | 10 | 100.0 | 1028 | 10 |
| 14AT73-15                                                                                                                  | 453  | 1233 | 0.37 | 4.700  | 0.0923 | 0.3173 | 0.0038 | 1767 | 16 | 1777 | 18 | 99.5  | 1777 | 18 |
| 14AT73-16                                                                                                                  | 779  | 1454 | 0.54 | 1.636  | 0.0289 | 0.1648 | 0.0017 | 984  | 11 | 983  | 9  | 100.1 | 983  | 9  |
| 14AT73-17                                                                                                                  | 1087 | 1124 | 0.97 | 1.220  | 0.0230 | 0.1324 | 0.0012 | 810  | 11 | 801  | 7  | 101.0 | 801  | 7  |
| 14AT73-18                                                                                                                  | 293  | 2074 | 0.14 | 2.108  | 0.0318 | 0.1955 | 0.0015 | 1151 | 10 | 1151 | 8  | 100.0 | 1151 | 8  |
| 14AT73-19                                                                                                                  | 624  | 750  | 0.83 | 0.5918 | 0.0254 | 0.0760 | 0.0010 | 472  | 16 | 472  | 6  | 100.0 | 472  | 6  |
| 14AT73-20                                                                                                                  | 346  | 503  | 0.69 | 11.610 | 0.2068 | 0.4907 | 0.0051 | 2573 | 17 | 2574 | 22 | 100.0 | 2574 | 22 |
| 14AT73-21                                                                                                                  | 1279 | 2164 | 0.59 | 4.908  | 0.0883 | 0.3228 | 0.0034 | 1804 | 15 | 1804 | 17 | 100.0 | 1804 | 17 |
| 14AT73-22                                                                                                                  | 305  | 1078 | 0.28 | 0.6313 | 0.0185 | 0.0790 | 0.0009 | 497  | 12 | 490  | 5  | 101.4 | 490  | 5  |
| 14AT73-23                                                                                                                  | 1257 | 1871 | 0.67 | 0.6814 | 0.0251 | 0.0849 | 0.0013 | 528  | 15 | 525  | 8  | 100.5 | 525  | 8  |
| 14AT73-24                                                                                                                  | 395  | 896  | 0.44 | 0.6255 | 0.0160 | 0.0758 | 0.0008 | 493  | 10 | 471  | 5  | 104.7 | 471  | 5  |
| 14AT73-25                                                                                                                  | 786  | 2423 | 0.32 | 11.689 | 0.3944 | 0.4913 | 0.0146 | 2580 | 32 | 2576 | 63 | 100.1 | 2576 | 63 |
| 14AT73-26                                                                                                                  | 507  | 745  | 0.68 | 0.5898 | 0.0144 | 0.0758 | 0.0008 | 471  | 9  | 471  | 5  | 100.0 | 471  | 5  |
| 14AT73-27                                                                                                                  | 1581 | 1688 | 0.94 | 0.7301 | 0.0157 | 0.0913 | 0.0009 | 557  | 9  | 563  | 5  | 98.8  | 563  | 5  |
| 14AT73-28                                                                                                                  | 1563 | 594  | 2.63 | 10.862 | 0.1941 | 0.4725 | 0.0056 | 2494 | 17 | 2494 | 24 | 100.0 | 2494 | 24 |
| 14AT73-29                                                                                                                  | 1083 | 1387 | 0.78 | 0.5787 | 0.0120 | 0.0761 | 0.0008 | 464  | 8  | 473  | 5  | 98.0  | 473  | 5  |
| 14AT73-30                                                                                                                  | 2064 | 1485 | 1.39 | 3.420  | 0.0751 | 0.2632 | 0.0047 | 1509 | 17 | 1506 | 24 | 100.2 | 1506 | 24 |
| 14AT73-31                                                                                                                  | 503  | 1073 | 0.47 | 5.994  | 0.0956 | 0.3594 | 0.0038 | 1975 | 14 | 1979 | 18 | 99.8  | 1979 | 18 |
| 14AT73-32                                                                                                                  | 828  | 960  | 0.86 | 0.5767 | 0.0145 | 0.0764 | 0.0009 | 462  | 9  | 475  | 5  | 97.4  | 475  | 5  |
| 14AT73-33                                                                                                                  | 710  | 1136 | 0.63 | 4.270  | 0.0743 | 0.2978 | 0.0031 | 1688 | 14 | 1680 | 15 | 100.4 | 1680 | 15 |
| 14AT73-34                                                                                                                  | 828  | 1701 | 0.49 | 0.5569 | 0.0132 | 0.0728 | 0.0010 | 450  | 9  | 453  | 6  | 99.2  | 453  | 6  |
| 14AT73-35                                                                                                                  | 379  | 874  | 0.43 | 0.5625 | 0.0156 | 0.0738 | 0.0008 | 453  | 10 | 459  | 5  | 98.7  | 459  | 5  |
| 14AT73-36                                                                                                                  | 116  | 276  | 0.42 | 1.285  | 0.0446 | 0.1389 | 0.0017 | 839  | 20 | 838  | 10 | 100.1 | 838  | 10 |
| 14AT73-37                                                                                                                  | 2744 | 3045 | 0.90 | 0.6949 | 0.0128 | 0.0861 | 0.0010 | 536  | 8  | 532  | 6  | 100.6 | 532  | 6  |
| 14AT73-38                                                                                                                  | 1626 | 2783 | 0.58 | 0.6080 | 0.0128 | 0.0745 | 0.0008 | 482  | 8  | 463  | 5  | 104.1 | 463  | 5  |
| 14AT73-39                                                                                                                  | 876  | 1076 | 0.81 | 0.6004 | 0.0139 | 0.0778 | 0.0009 | 477  | 9  | 483  | 5  | 98.8  | 483  | 5  |
| 14AT73-40                                                                                                                  | 1294 | 2284 | 0.57 | 0.5646 | 0.0117 | 0.0756 | 0.0010 | 455  | 8  | 470  | 6  | 96.7  | 470  | 6  |
| 14AT73-41                                                                                                                  | 350  | 1492 | 0.23 | 1.524  | 0.0296 | 0.1587 | 0.0018 | 940  | 12 | 949  | 10 | 99.0  | 949  | 10 |
| 14AT73-42                                                                                                                  | 1828 | 1761 | 1.04 | 0.6166 | 0.0136 | 0.0772 | 0.0007 | 488  | 9  | 479  | 4  | 101.7 | 479  | 4  |
| Sample 14AT79, metatuff, northern Atbashi Range, Atabashi HP-LT belt, (Sang et al., 2017, Journal of Asian Earth Sciences) |      |      |      |        |        |        |        |      |    |      |    |       |      |    |
| 14AT79-1                                                                                                                   | 142  | 872  | 0.16 | 0.4739 | 0.0091 | 0.0616 | 0.0013 | 394  | 6  | 386  | 8  | 102.2 | 386  | 8  |
| 14AT79-2                                                                                                                   | 118  | 486  | 0.24 | 0.4924 | 0.0245 | 0.0641 | 0.0017 | 407  | 17 | 400  | 10 | 101.5 | 400  | 10 |
| 14AT79-3                                                                                                                   | 690  | 1096 | 0.63 | 0.4573 | 0.0102 | 0.0611 | 0.0013 | 382  | 7  | 382  | 8  | 100.1 | 382  | 8  |
| 14AT79-4                                                                                                                   | 399  | 575  | 0.69 | 0.4913 | 0.0176 | 0.0627 | 0.0015 | 406  | 12 | 392  | 9  | 103.6 | 392  | 9  |
| 14AT79-5                                                                                                                   | 480  | 948  | 0.51 | 0.4708 | 0.0108 | 0.0618 | 0.0014 | 392  | 7  | 387  | 8  | 101.3 | 387  | 8  |
| 14AT79-6                                                                                                                   | 601  | 1640 | 0.37 | 0.4678 | 0.0090 | 0.0622 | 0.0013 | 390  | 6  | 389  | 8  | 100.2 | 389  | 8  |
| 14AT79-7                                                                                                                   | 156  | 597  | 0.26 | 0.5584 | 0.0101 | 0.0709 | 0.0015 | 451  | 7  | 441  | 9  | 102.1 | 441  | 9  |
| 14AT79-8                                                                                                                   | 377  | 708  | 0.53 | 0.4575 | 0.0132 | 0.0613 | 0.0014 | 383  | 9  | 384  | 8  | 99.7  | 384  | 8  |
| 14AT79-9                                                                                                                   | 302  | 635  | 0.48 | 0.4630 | 0.0111 | 0.0592 | 0.0013 | 386  | 8  | 371  | 8  | 104.2 | 371  | 8  |
| 14AT79-10                                                                                                                  | 1773 | 2548 | 0.70 | 0.4500 | 0.0098 | 0.0573 | 0.0013 | 377  | 7  | 359  | 8  | 105.0 | 359  | 8  |
| 14AT79-11                                                                                                                  | 348  | 824  | 0.42 | 0.4813 | 0.0103 | 0.0630 | 0.0014 | 399  | 7  | 394  | 8  | 101.4 | 394  | 8  |
| 14AT79-12                                                                                                                  | 276  | 648  | 0.43 | 0.5337 | 0.0128 | 0.0692 | 0.0015 | 434  | 8  | 431  | 9  | 100.7 | 431  | 9  |
| 14AT79-13                                                                                                                  | 196  | 748  | 0.26 | 0.4663 | 0.0088 | 0.0612 | 0.0013 | 389  | 6  | 383  | 8  | 101.6 | 383  | 8  |
| 14AT79-14                                                                                                                  | 153  | 555  | 0.28 | 0.4839 | 0.0166 | 0.0638 | 0.0015 | 401  | 11 | 399  | 9  | 100.5 | 399  | 9  |
| 14AT79-15                                                                                                                  | 575  | 1129 | 0.51 | 0.4814 | 0.0092 | 0.0619 | 0.0013 | 399  | 6  | 387  | 8  | 103.0 | 387  | 8  |
| 14AT79-16                                                                                                                  | 146  | 603  | 0.24 | 0.4652 | 0.0131 | 0.0610 | 0.0014 | 388  | 9  | 382  | 8  | 101.6 | 382  | 8  |
| 14AT79-17                                                                                                                  | 121  | 627  | 0.19 | 0.4630 | 0.0114 | 0.0600 | 0.0013 | 386  | 8  | 376  | 8  | 102.8 | 376  | 8  |
| 14AT79-18                                                                                                                  | 165  | 246  | 0.67 | 0.4703 | 0.0265 | 0.0620 | 0.0018 | 391  | 18 | 388  | 11 | 101.0 | 388  | 11 |
| 14AT79-19                                                                                                                  | 104  | 1462 | 0.07 | 0.4786 | 0.0080 | 0.0607 | 0.0013 | 397  | 5  | 380  | 8  | 104.6 | 380  | 8  |
| 14AT79-20                                                                                                                  | 383  | 761  | 0.50 | 0.4601 | 0.0151 | 0.0598 | 0.0014 | 384  | 11 | 374  | 9  | 102.7 | 374  | 9  |
| 14AT79-21                                                                                                                  | 146  | 238  | 0.61 | 0.4647 | 0.0223 | 0.0607 | 0.0016 | 388  | 15 | 380  | 10 | 102.1 | 380  | 10 |
| 14AT79-22                                                                                                                  | 135  | 294  | 0.46 | 0.4909 | 0.0211 | 0.0639 | 0.0016 | 406  | 14 | 399  | 10 | 101.5 | 399  | 10 |
| 14AT79-23                                                                                                                  | 110  | 418  | 0.26 | 0.4545 | 0.0125 | 0.0608 | 0.0014 | 380  | 9  | 381  | 8  | 99.9  | 381  | 8  |
| 14AT79-24                                                                                                                  | 382  | 529  | 0.72 | 0.4972 | 0.0126 | 0.0628 | 0.0014 | 410  | 9  | 393  | 9  | 104.3 | 393  | 9  |
| 14AT79-25                                                                                                                  | 355  | 360  | 0.99 | 0.4678 | 0.0120 | 0.0602 | 0.0014 | 390  | 8  | 377  | 8  | 103.5 | 377  | 8  |
| 14AT79-26                                                                                                                  | 529  | 880  | 0.60 | 0.4791 | 0.0126 | 0.0624 | 0.0014 | 398  | 9  | 390  | 9  | 101.8 | 390  | 9  |
| 14AT79-27                                                                                                                  | 163  | 321  | 0.51 | 0.4768 | 0.0115 | 0.0628 | 0.0014 | 396  | 8  | 393  | 8  | 100.8 | 393  | 8  |
| 14AT79-28                                                                                                                  | 82   | 319  | 0.26 | 0.5507 | 0.0273 | 0.0708 | 0.0019 | 446  | 18 | 441  | 12 | 101.0 | 441  | 12 |
| 14AT79-29                                                                                                                  | 113  | 300  | 0.38 | 0.5574 | 0.0212 | 0.0693 | 0.0017 | 450  | 14 | 432  | 10 | 104.1 | 432  | 10 |
| 14AT79-30                                                                                                                  | 90   | 406  | 0.22 | 0.5179 | 0.0144 | 0.0645 | 0.0015 | 424  | 10 | 403  | 9  | 105.2 | 403  | 9  |
| 14AT79-31                                                                                                                  | 75   | 469  | 0.16 | 0.4864 | 0.0100 | 0.0651 | 0.0014 | 403  | 7  | 407  | 9  | 99.9  | 407  | 9  |
| 14AT79-32                                                                                                                  | 255  | 434  | 0.59 | 0.5376 | 0.0113 | 0.0664 | 0.0015 | 437  | 7  | 414  | 9  | 105.5 | 414  | 9  |
| 14AT79-33                                                                                                                  | 228  | 574  | 0.40 | 0.4899 | 0.0097 | 0.0635 | 0.0014 | 405  | 7  | 397  | 8  | 102.0 | 397  | 8  |
| 14AT79-34                                                                                                                  | 82   | 383  | 0.21 | 0.4890 | 0.0111 | 0.0643 | 0.0014 | 404  | 8  | 402  | 9  | 100.6 | 402  | 9  |
| 14AT79-35                                                                                                                  | 85   | 275  | 0.31 | 0.5305 | 0.0168 | 0.0677 | 0.0016 | 432  | 11 | 423  | 10 | 102.3 | 423  | 10 |
| 14AT79-36                                                                                                                  | 241  | 621  | 0.39 | 0.5842 | 0.0205 | 0.0755 | 0.0018 | 467  | 13 | 469  | 11 | 99.6  | 469  | 11 |
| 14AT79-37                                                                                                                  | 655  | 1098 | 0.60 | 0.4725 | 0.0089 | 0.0621 | 0.0013 | 393  | 6  | 388  | 8  | 101.2 | 388  | 8  |
| 14AT79-38                                                                                                                  | 263  | 964  | 0.27 | 0.5646 | 0.0145 | 0.0714 | 0.0016 | 455  | 9  | 444  | 10 | 102.3 | 444  | 10 |
| 14AT79-39                                                                                                                  | 228  | 583  | 0.39 | 0.5063 | 0.0120 | 0      |        |      |    |      |    |       |      |    |

|           |      |      |      |        |        |        |        |      |    |      |    |       |      |    |
|-----------|------|------|------|--------|--------|--------|--------|------|----|------|----|-------|------|----|
| 14AT80-15 | 458  | 890  | 0.51 | 3.116  | 0.0629 | 0.2488 | 0.0045 | 1437 | 16 | 1432 | 23 | 100.3 | 1432 | 23 |
| 14AT80-16 | 1763 | 2686 | 0.66 | 1.309  | 0.0221 | 0.1398 | 0.0022 | 850  | 10 | 843  | 12 | 100.8 | 843  | 12 |
| 14AT80-17 | 1290 | 1598 | 0.81 | 1.655  | 0.0389 | 0.1664 | 0.0034 | 992  | 15 | 992  | 19 | 100.0 | 992  | 19 |
| 14AT80-18 | 856  | 1489 | 0.57 | 0.5863 | 0.0127 | 0.0755 | 0.0009 | 468  | 8  | 469  | 6  | 99.8  | 469  | 6  |
| 14AT80-19 | 1567 | 1836 | 0.85 | 1.635  | 0.0346 | 0.1673 | 0.0025 | 984  | 13 | 997  | 14 | 98.7  | 997  | 14 |
| 14AT80-20 | 1551 | 1741 | 0.89 | 0.5443 | 0.0120 | 0.0709 | 0.0009 | 441  | 8  | 442  | 6  | 99.9  | 442  | 6  |
| 14AT80-21 | 1300 | 936  | 1.39 | 0.5477 | 0.0139 | 0.0712 | 0.0011 | 443  | 9  | 443  | 7  | 100.0 | 443  | 7  |
| 14AT80-22 | 2404 | 2170 | 1.11 | 0.6250 | 0.0142 | 0.0794 | 0.0011 | 493  | 9  | 493  | 7  | 100.1 | 493  | 7  |
| 14AT80-23 | 294  | 2475 | 0.12 | 0.4857 | 0.0098 | 0.0648 | 0.0009 | 402  | 7  | 405  | 5  | 99.3  | 405  | 5  |
| 14AT80-24 | 474  | 770  | 0.62 | 1.416  | 0.0364 | 0.1492 | 0.0020 | 896  | 15 | 896  | 11 | 99.9  | 896  | 11 |
| 14AT80-25 | 714  | 2711 | 0.26 | 1.272  | 0.0253 | 0.1409 | 0.0018 | 833  | 11 | 850  | 10 | 98.1  | 850  | 10 |
| 14AT80-26 | 1768 | 3016 | 0.59 | 0.5975 | 0.0141 | 0.0769 | 0.0015 | 476  | 9  | 478  | 9  | 99.6  | 478  | 9  |
| 14AT80-27 | 345  | 344  | 1.00 | 0.5510 | 0.0217 | 0.0723 | 0.0011 | 446  | 14 | 450  | 6  | 99.0  | 450  | 6  |
| 14AT80-28 | 1161 | 1246 | 0.93 | 0.5973 | 0.0138 | 0.0759 | 0.0012 | 475  | 9  | 471  | 7  | 100.8 | 471  | 7  |
| 14AT80-29 | 685  | 883  | 0.78 | 0.5499 | 0.0248 | 0.0713 | 0.0013 | 445  | 16 | 444  | 8  | 100.2 | 444  | 8  |
| 14AT80-30 | 200  | 1316 | 0.15 | 1.698  | 0.0272 | 0.1690 | 0.0016 | 1008 | 10 | 1007 | 9  | 100.1 | 1007 | 9  |
| 14AT80-31 | 805  | 1262 | 0.64 | 0.5163 | 0.0121 | 0.0681 | 0.0010 | 423  | 8  | 425  | 6  | 99.5  | 425  | 6  |
| 14AT80-32 | 363  | 428  | 0.85 | 0.5133 | 0.0185 | 0.0678 | 0.0010 | 421  | 12 | 423  | 6  | 99.5  | 423  | 6  |
| 14AT80-33 | 427  | 767  | 0.56 | 0.5408 | 0.0165 | 0.0700 | 0.0009 | 439  | 11 | 436  | 5  | 100.6 | 436  | 5  |
| 14AT80-34 | 303  | 362  | 0.84 | 0.4976 | 0.0160 | 0.0666 | 0.0009 | 410  | 11 | 415  | 5  | 98.7  | 415  | 5  |
| 14AT80-35 | 390  | 451  | 0.87 | 1.276  | 0.0279 | 0.1383 | 0.0015 | 835  | 12 | 835  | 9  | 100.0 | 835  | 9  |
| 14AT80-36 | 632  | 1120 | 0.56 | 0.5360 | 0.0129 | 0.0707 | 0.0007 | 436  | 9  | 441  | 4  | 98.9  | 441  | 4  |
| 14AT80-37 | 463  | 1068 | 0.43 | 3.028  | 0.0622 | 0.2475 | 0.0034 | 1415 | 16 | 1425 | 18 | 99.2  | 1425 | 18 |
| 14AT80-38 | 632  | 975  | 0.65 | 1.287  | 0.0261 | 0.1409 | 0.0018 | 840  | 12 | 850  | 10 | 98.9  | 850  | 10 |

Sample XT12-12, sandstone, Late Permian Biyoulebaoguzi Formation in Heiyingshan section of STB, (Liu et al., 2013, Tectonophysics)

|         |      |        |        |        |        |        |        |      |     |      |    |      |    |       |      |    |
|---------|------|--------|--------|--------|--------|--------|--------|------|-----|------|----|------|----|-------|------|----|
| XJ12-01 | 0.92 | 0.0553 | 0.0025 | 0.5131 | 0.0235 | 0.0673 | 0.0011 | 423  | 72  | 420  | 16 | 420  | 7  | 100.0 | 420  | 7  |
| XJ12-02 | 0.62 | 0.0551 | 0.0019 | 0.5235 | 0.0182 | 0.0689 | 0.0011 | 417  | 48  | 427  | 12 | 429  | 7  | 99.5  | 429  | 7  |
| XJ12-03 | 0.85 | 0.0787 | 0.0019 | 2.104  | 0.0518 | 0.1938 | 0.0030 | 1165 | 26  | 1150 | 17 | 1142 | 16 | 102.0 | 1165 | 26 |
| XJ12-04 | 1.06 | 0.0671 | 0.0018 | 1.247  | 0.0346 | 0.1348 | 0.0021 | 839  | 32  | 822  | 16 | 815  | 12 | 100.9 | 815  | 12 |
| XJ12-05 | 0.83 | 0.0552 | 0.0015 | 0.5087 | 0.0144 | 0.0668 | 0.0010 | 422  | 36  | 418  | 10 | 417  | 6  | 100.2 | 417  | 6  |
| XJ12-06 | 1.09 | 0.0824 | 0.0028 | 2.442  | 0.0827 | 0.2149 | 0.0037 | 1255 | 40  | 1255 | 24 | 1255 | 19 | 100.0 | 1255 | 40 |
| XJ12-07 | 0.79 | 0.0548 | 0.0019 | 0.5013 | 0.0175 | 0.0663 | 0.0011 | 406  | 49  | 413  | 12 | 414  | 6  | 99.8  | 414  | 6  |
| XJ12-08 | 0.67 | 0.0565 | 0.0017 | 0.5681 | 0.0171 | 0.0728 | 0.0012 | 474  | 39  | 457  | 11 | 453  | 7  | 100.9 | 453  | 7  |
| XJ12-09 | 0.56 | 0.0553 | 0.0026 | 0.5177 | 0.0243 | 0.0678 | 0.0013 | 426  | 71  | 424  | 16 | 423  | 8  | 100.2 | 423  | 8  |
| XJ12-10 | 0.63 | 0.0552 | 0.0020 | 0.5114 | 0.0181 | 0.0672 | 0.0012 | 419  | 48  | 419  | 12 | 419  | 7  | 100.0 | 419  | 7  |
| XJ12-11 | 0.46 | 0.0524 | 0.0021 | 0.3416 | 0.0134 | 0.0473 | 0.0009 | 302  | 57  | 298  | 10 | 298  | 5  | 100.0 | 298  | 5  |
| XJ12-12 | 0.81 | 0.0513 | 0.0029 | 0.2809 | 0.0156 | 0.0397 | 0.0008 | 253  | 90  | 251  | 12 | 251  | 5  | 100.0 | 251  | 5  |
| XJ12-13 | 0.71 | 0.0716 | 0.0024 | 1.636  | 0.0554 | 0.1658 | 0.0029 | 974  | 41  | 984  | 21 | 989  | 16 | 99.5  | 989  | 16 |
| XJ12-14 | 0.61 | 0.0555 | 0.0021 | 0.5284 | 0.0195 | 0.0691 | 0.0012 | 431  | 52  | 431  | 13 | 431  | 7  | 100.0 | 431  | 7  |
| XJ12-15 | 0.40 | 0.0517 | 0.0023 | 0.3156 | 0.0141 | 0.0443 | 0.0008 | 272  | 68  | 279  | 11 | 279  | 5  | 100.0 | 279  | 5  |
| XJ12-16 | 0.56 | 0.0549 | 0.0019 | 0.5104 | 0.0174 | 0.0674 | 0.0012 | 409  | 46  | 419  | 12 | 420  | 7  | 99.8  | 420  | 7  |
| XJ12-17 | 0.81 | 0.0549 | 0.0020 | 0.4885 | 0.0172 | 0.0645 | 0.0011 | 408  | 48  | 404  | 12 | 403  | 7  | 100.2 | 403  | 7  |
| XJ12-18 | 0.50 | 0.0673 | 0.0022 | 1.231  | 0.0394 | 0.1327 | 0.0023 | 846  | 39  | 815  | 18 | 803  | 13 | 101.5 | 803  | 13 |
| XJ12-19 | 0.93 | 0.1640 | 0.0050 | 10.585 | 0.3232 | 0.4681 | 0.0078 | 2497 | 30  | 2487 | 28 | 2475 | 34 | 100.9 | 2497 | 30 |
| XJ12-20 | 0.94 | 0.0558 | 0.0019 | 0.5535 | 0.0182 | 0.0720 | 0.0012 | 443  | 43  | 447  | 12 | 448  | 7  | 99.8  | 448  | 7  |
| XJ12-21 | 0.53 | 0.0733 | 0.0026 | 1.755  | 0.0610 | 0.1736 | 0.0030 | 1022 | 43  | 1029 | 22 | 1032 | 17 | 99.0  | 1022 | 43 |
| XJ12-22 | 0.89 | 0.0682 | 0.0025 | 1.372  | 0.0492 | 0.1458 | 0.0026 | 875  | 45  | 877  | 21 | 878  | 14 | 99.9  | 878  | 14 |
| XJ12-23 | 0.59 | 0.0549 | 0.0024 | 0.5030 | 0.0214 | 0.0664 | 0.0012 | 409  | 62  | 414  | 14 | 415  | 7  | 99.8  | 415  | 7  |
| XJ12-24 | 0.26 | 0.0583 | 0.0019 | 0.6418 | 0.0211 | 0.0798 | 0.0014 | 541  | 43  | 503  | 13 | 495  | 8  | 101.6 | 495  | 8  |
| XJ12-25 | 1.16 | 0.0554 | 0.0026 | 0.5464 | 0.0248 | 0.0715 | 0.0013 | 428  | 69  | 443  | 16 | 445  | 8  | 99.6  | 445  | 8  |
| XJ12-26 | 0.70 | 0.0550 | 0.0019 | 0.5170 | 0.0181 | 0.0682 | 0.0012 | 413  | 47  | 423  | 12 | 425  | 7  | 99.5  | 425  | 7  |
| XJ12-27 | 0.36 | 0.0844 | 0.0027 | 2.608  | 0.0839 | 0.2240 | 0.0038 | 1303 | 37  | 1303 | 24 | 1303 | 20 | 100.0 | 1303 | 37 |
| XJ12-28 | 0.70 | 0.0559 | 0.0024 | 0.5654 | 0.0234 | 0.0733 | 0.0014 | 449  | 59  | 455  | 15 | 456  | 8  | 99.8  | 456  | 8  |
| XJ12-29 | 0.41 | 0.0555 | 0.0022 | 0.5348 | 0.0208 | 0.0699 | 0.0013 | 432  | 54  | 435  | 14 | 435  | 8  | 100.0 | 435  | 8  |
| XJ12-30 | 0.73 | 0.0554 | 0.0021 | 0.5143 | 0.0188 | 0.0673 | 0.0012 | 430  | 50  | 421  | 13 | 420  | 7  | 100.2 | 420  | 7  |
| XJ12-31 | 0.66 | 0.0522 | 0.0019 | 0.3314 | 0.0117 | 0.0460 | 0.0008 | 295  | 49  | 291  | 9  | 290  | 5  | 100.3 | 290  | 5  |
| XJ12-32 | 0.91 | 0.0546 | 0.0021 | 0.5076 | 0.0193 | 0.0674 | 0.0012 | 397  | 53  | 417  | 13 | 420  | 7  | 99.3  | 420  | 7  |
| XJ12-33 | 0.38 | 0.0557 | 0.0023 | 0.5297 | 0.0213 | 0.0690 | 0.0013 | 438  | 57  | 432  | 14 | 430  | 8  | 100.5 | 430  | 8  |
| XJ12-34 | 0.29 | 0.1703 | 0.0056 | 10.616 | 0.3447 | 0.4519 | 0.0077 | 2561 | 32  | 2490 | 30 | 2404 | 34 | 106.5 | 2561 | 32 |
| XJ12-35 | 0.56 | 0.0549 | 0.0022 | 0.5044 | 0.0196 | 0.0667 | 0.0012 | 406  | 55  | 415  | 13 | 416  | 7  | 99.8  | 416  | 7  |
| XJ12-36 | 0.80 | 0.0551 | 0.0021 | 0.5187 | 0.0196 | 0.0683 | 0.0012 | 415  | 53  | 424  | 13 | 426  | 7  | 99.5  | 426  | 7  |
| XJ12-37 | 0.56 | 0.0549 | 0.0021 | 0.5014 | 0.0192 | 0.0662 | 0.0012 | 408  | 53  | 413  | 13 | 413  | 7  | 100.0 | 413  | 7  |
| XJ12-38 | 0.97 | 0.0549 | 0.0028 | 0.4886 | 0.0240 | 0.0646 | 0.0013 | 407  | 75  | 404  | 16 | 403  | 8  | 100.2 | 403  | 8  |
| XJ12-39 | 0.64 | 0.0552 | 0.0024 | 0.5211 | 0.0222 | 0.0684 | 0.0013 | 421  | 62  | 426  | 15 | 427  | 8  | 99.8  | 427  | 8  |
| XJ12-40 | 0.47 | 0.0519 | 0.0024 | 0.3213 | 0.0149 | 0.0449 | 0.0008 | 282  | 74  | 283  | 11 | 283  | 5  | 100.0 | 283  | 5  |
| XJ12-41 | 0.77 | 0.0567 | 0.0015 | 0.5727 | 0.0154 | 0.0732 | 0.0012 | 481  | 33  | 460  | 10 | 455  | 7  | 101.1 | 455  | 7  |
| XJ12-42 | 0.61 | 0.0541 | 0.0020 | 0.4529 | 0.0171 | 0.0607 | 0.0010 | 374  | 56  | 379  | 12 | 380  | 6  | 99.7  | 380  | 6  |
| XJ12-43 | 0.21 | 0.0710 | 0.0017 | 1.533  | 0.0387 | 0.1565 | 0.0024 | 958  | 27  | 944  | 16 | 938  | 14 | 100.6 | 938  | 14 |
| XJ12-44 | 0.74 | 0.0563 | 0.0019 | 0.5812 | 0.0202 | 0.0749 | 0.0012 | 463  | 48  | 465  | 13 | 466  | 7  | 99.8  | 466  | 7  |
| XJ12-45 | 0.52 | 0.0554 | 0.0017 | 0.5367 | 0.0171 | 0.0702 | 0.0011 | 428  | 43  | 436  | 11 | 438  | 7  | 99.5  | 438  | 7  |
| XJ12-46 | 0.91 | 0.0555 | 0.0024 | 0.5154 | 0.0218 | 0.0674 | 0.0012 | 431  | 63  | 422  | 15 | 420  | 7  | 100.5 | 420  | 7  |
| XJ12-47 | 0.45 | 0.1192 | 0.0026 | 5.740  | 0.1313 | 0.3492 | 0.0053 | 1944 | 21  | 1937 | 20 | 1931 | 25 | 100.7 | 1944 | 21 |
| XJ12-48 | 0.28 | 0.0718 | 0.0021 | 1.641  | 0.0487 | 0.1656 | 0.0026 | 981  | 35  | 986  | 19 | 988  | 15 | 99.8  | 988  | 15 |
| XJ12-49 | 0.79 | 0.0550 | 0.0017 | 0.5074 | 0.0162 | 0.0669 | 0.0011 | 413  | 43  | 417  | 11 | 417  | 6  | 100.0 | 417  | 6  |
| XJ12-50 | 0.75 | 0.0550 | 0.0023 | 0.5069 | 0.0211 | 0.0669 | 0.0012 | 411  | 62  | 416  | 14 | 417  | 7  | 99.8  | 417  | 7  |
| XJ12-51 | 0.47 | 0.0524 | 0.0048 | 0.3345 | 0.0302 | 0.0463 | 0.0009 | 302  | 169 | 293  | 23 | 292  | 6  | 100.3 | 292  | 6  |
| XJ12-52 | 0.24 | 0.0584 | 0.0016 | 0.5885 | 0.0168 | 0.0731 | 0.0011 | 543  | 36  | 470  | 11 | 455  | 7  | 103.3 | 455  | 7  |
| XJ12-53 | 0.91 | 0.0568 | 0.0031 | 0.6293 | 0.0337 | 0.0804 | 0.0015 | 483  | 85  | 496  | 21 | 498  | 9  | 99.6  | 498  | 9  |
| XJ12-54 | 0.94 | 0.0555 | 0.0015 | 0.5366 | 0.0152 | 0.0701 | 0.0011 | 432  | 36  | 436  | 10 | 437  | 7  | 99.8  | 437  | 7  |
| XJ12-55 | 0.66 | 0.0550 | 0.0019 | 0.5104 | 0.0181 | 0.0673 | 0.0011 | 413  | 50  | 419  | 12 | 420  | 7  | 99.8  | 420  | 7  |
| XJ12-56 | 0.76 | 0.1140 | 0.0029 | 5.317  | 0.1376 | 0.3381 | 0.0054 | 1864 | 25  | 1872 | 22 | 1878 | 26 | 99.3  | 1864 | 25 |
| XJ12-57 | 1.00 | 0.0559 | 0.0036 | 0.5403 | 0.0342 | 0.0701 | 0.0014 | 449  | 106 | 439  | 23 | 437  | 8  | 100.5 | 437  | 8  |
| XJ12-58 | 0.84 | 0.0549 | 0.0020 | 0.4906 | 0.0180 | 0.0649 | 0.0011 | 406  | 53  | 405  | 12 | 405  | 6  | 100.0 | 405  | 6  |
| XJ12-59 | 0.78 | 0.0552 | 0.0021 | 0.5045 | 0.0193 | 0.0663 | 0.0011 | 420  | 56  | 415  | 13 | 414  | 7  | 100.2 | 414  | 7  |
| XJ12-60 | 0.74 | 0.0552 | 0.0018 | 0.5107 | 0.0165 | 0.0671 | 0.0011 | 419  | 43  | 419  | 11 | 419  | 7  | 100.0 | 419  | 7  |
| XJ12-61 | 1.03 | 0.0969 | 0.0023 | 3.583  | 0.0891 | 0.2681 | 0.0042 | 1566 | 25  | 1546 | 20 | 1531 | 21 | 102.3 | 1566 | 25 |
| XJ12-62 | 0.54 | 0.0555 | 0.0016 | 0.5489 | 0.0162 | 0.0717 | 0.0012 | 432  | 38  | 444  | 11 | 447  | 7  | 99.3  | 447  | 7  |
| XJ12-63 | 0.71 | 0.0552 | 0.0021 | 0.5218 | 0.0194 | 0.0685 | 0.0012 | 422  | 53  | 426  | 13 | 427  | 7  | 99.8  | 427  | 7  |
| XJ12-64 | 0.79 | 0.0552 | 0.0020 | 0.5141 | 0.0184 | 0.0676 | 0.0012 | 419  | 50  | 421  | 12 | 421  | 7  | 100.0 | 421  | 7  |
| XJ12-65 | 0.27 | 0.1178 | 0.0026 | 5.091  | 0.1197 | 0.3134 | 0.0048 | 1923 | 22  | 1835 | 20 | 1758 | 23 | 109.4 | 1923 | 22 |
| XJ12-66 | 0.75 | 0.0694 | 0.0016 | 1.471  | 0.0356 | 0.1537 | 0.0024 | 912  | 26  | 919  | 15 | 921  | 13 | 99.8  | 921  | 13 |
| XJ12-67 | 0.81 | 0.0556 | 0.0018 | 0.5246 | 0.0168 | 0.0684 | 0.0011 | 436  | 43  | 428  | 11 | 427  | 7  | 100.2 | 427  | 7  |
| XJ12-68 | 0.60 | 0.0660 | 0.0016 | 1.211  | 0.0312 | 0.1331 | 0.0021 | 806  | 29  | 806  | 14 | 805  | 12 | 100.1 | 805  | 12 |
| XJ12-69 | 0.41 | 0.0661 | 0.0017 | 1.194  | 0.0314 | 0.1309 | 0.0020 | 811  | 30  | 798  | 15 | 793  | 12 | 100.6 | 793  | 12 |
| XJ12-70 | 0.45 | 0.0559 | 0.0017 | 0.5636 | 0.0173 | 0.0731 | 0.0012 | 448  | 40  | 454  | 11 | 455  | 7  | 99.8  | 455  | 7  |
| XJ12-71 | 0.61 | 0.0549 | 0.0023 | 0.5015 | 0.0207 | 0.0663 | 0.0011 | 408  | 62  | 413  | 14 | 414  | 7  | 99.8  | 414  | 7  |
| XJ12-72 | 1.52 | 0.0556 | 0.0014 | 0.5394 | 0.0142 | 0.0703 | 0.0011 | 438  | 32  | 438  | 9  | 438  | 7  | 100.0 | 438  | 7  |
| XJ12-73 | 1.08 | 0.0922 | 0.0023 | 3.297  | 0.0856 | 0.2593 | 0.0041 | 1472 | 26  | 1480 | 20 | 1486 | 21 | 99.1  | 1472 | 26 |
| XJ12-74 | 0.50 | 0.0560 | 0.0016 | 0.5593 | 0.0160 | 0.0724 | 0.0012 | 454  | 36  | 451  | 10 | 450  | 7  | 100.2 | 450  | 7  |
| XJ12-75 | 1.08 | 0.0559 | 0.0018 | 0.5453 | 0.0174 | 0.0707 | 0.0011 | 449  | 43  | 442  | 11 | 440  | 7  | 100.5 | 440  | 7  |
| XJ12-76 | 0.52 | 0.0557 | 0.0014 | 0.5500 | 0.0143 | 0.0716 | 0.0011 | 440  | 31  | 445  | 9  | 446  | 7  | 99.8  | 446  | 7  |
| XJ12-77 | 0.78 | 0.0552 | 0.0032 | 0.5140 | 0.0298 | 0.0675 | 0.0012 | 421  | 97  | 421  | 20 | 421  | 7  | 100.0 | 421  | 7  |
| XJ12-78 | 0.53 | 0.0519 | 0.0052 | 0.3300 | 0.0329 | 0.0461 | 0.0010 | 280  | 185 | 290  | 25 | 291  | 6  | 99.7  | 291  | 6  |
| XJ12-79 | 0.59 |        |        |        |        |        |        |      |     |      |    |      |    |       |      |    |

|          |      |        |        |        |        |        |        |     |    |     |    |     |   |       |     |   |
|----------|------|--------|--------|--------|--------|--------|--------|-----|----|-----|----|-----|---|-------|-----|---|
| XJ12-94  | 1.05 | 0.0562 | 0.0020 | 0.5609 | 0.0202 | 0.0724 | 0.0012 | 459 | 50 | 452 | 13 | 451 | 7 | 100.2 | 451 | 7 |
| XJ12-95  | 0.69 | 0.0552 | 0.0019 | 0.5183 | 0.0178 | 0.0680 | 0.0012 | 422 | 47 | 424 | 12 | 424 | 7 | 100.0 | 424 | 7 |
| XJ12-96  | 0.25 | 0.0525 | 0.0021 | 0.3500 | 0.0138 | 0.0484 | 0.0008 | 306 | 58 | 305 | 10 | 305 | 5 | 100.0 | 305 | 5 |
| XJ12-97  | 0.68 | 0.0552 | 0.0017 | 0.4982 | 0.0151 | 0.0655 | 0.0011 | 418 | 40 | 410 | 10 | 409 | 6 | 100.2 | 409 | 6 |
| XJ12-98  | 1.15 | 0.0556 | 0.0024 | 0.5409 | 0.0233 | 0.0705 | 0.0012 | 438 | 65 | 439 | 15 | 439 | 7 | 100.0 | 439 | 7 |
| XJ12-99  | 0.57 | 0.0550 | 0.0019 | 0.5117 | 0.0177 | 0.0675 | 0.0012 | 411 | 47 | 420 | 12 | 421 | 7 | 99.8  | 421 | 7 |
| XJ12-100 | 0.26 | 0.0521 | 0.0021 | 0.3465 | 0.0138 | 0.0482 | 0.0008 | 291 | 59 | 302 | 10 | 303 | 5 | 99.7  | 303 | 5 |

Sample 89K-118, sandstone, Middle-Late Permian, north of Kuche in STB, (Carroll et al., 2013, International Geology Review)

|           |     |      |        |        |        |        |        |        |      |     |      |    |      |     |       |            |    |
|-----------|-----|------|--------|--------|--------|--------|--------|--------|------|-----|------|----|------|-----|-------|------------|----|
| 89K118-1  | 231 | 1.25 | 0.0550 | 0.0013 | 0.5101 | 0.0128 | 0.0673 | 0.0003 | 411  | 55  | 419  | 9  | 420  | 2   | 99.7  | 420        | 2  |
| 89K118-2  | 194 | 1.00 | 0.1016 | 0.0007 | 4.046  | 0.0809 | 0.2887 | 0.0052 | 1654 | 14  | 1643 | 16 | 1635 | 27  | 101.1 | 1654       | 14 |
| 89K118-3  | 146 | 1.00 | 0.0523 | 0.0045 | 0.4603 | 0.0405 | 0.0638 | 0.0013 | 299  | 195 | 385  | 28 | 399  | 8   | 96.4  | 399        | 8  |
| 89K118-4  | 58  | 0.77 | 0.0530 | 0.0079 | 0.4868 | 0.0735 | 0.0666 | 0.0013 | 328  | 342 | 403  | 50 | 416  | 8   | 96.8  | 416        | 8  |
| 89K118-5  | 411 | 0.31 | 0.0723 | 0.0008 | 1.552  | 0.0807 | 0.1556 | 0.0079 | 996  | 22  | 951  | 32 | 932  | 45  | 102.0 | 932        | 45 |
| 89K118-6  | 481 | 0.21 | 0.0611 | 0.0006 | 0.8766 | 0.0140 | 0.1040 | 0.0012 | 643  | 22  | 639  | 8  | 638  | 7   | 100.2 | 638        | 7  |
| 89K118-7  | 449 | 0.77 | 0.0555 | 0.0009 | 0.5624 | 0.0096 | 0.0735 | 0.0005 | 431  | 35  | 453  | 6  | 458  | 3   | 99.0  | 458        | 3  |
| 89K118-8  | 106 | 0.42 | 0.0565 | 0.0084 | 0.5223 | 0.0778 | 0.0670 | 0.0013 | 474  | 330 | 427  | 52 | 418  | 8   | 102.1 | 418        | 8  |
| 89K118-9  | 195 | 0.77 | 0.0535 | 0.0060 | 0.5122 | 0.0589 | 0.0694 | 0.0014 | 351  | 256 | 420  | 40 | 433  | 9   | 97.0  | 433        | 9  |
| 89K118-10 | 477 | 0.12 | 0.0954 | 0.0003 | 3.537  | 0.0530 | 0.2688 | 0.0040 | 1536 | 6   | 1535 | 12 | 1535 | 20  | 100.1 | 1536       | 6  |
| 89K118-11 | 132 | 0.53 | 0.0908 | 0.0015 | 3.167  | 0.0665 | 0.2528 | 0.0033 | 1443 | 32  | 1449 | 16 | 1453 | 17  | 99.3  | 1443       | 32 |
| 89K118-12 | 177 | 0.53 | 0.0558 | 0.0032 | 0.4930 | 0.0291 | 0.0640 | 0.0010 | 446  | 127 | 407  | 20 | 400  | 6   | 101.7 | 400        | 6  |
| 89K118-12 | 134 | 0.71 | 0.0537 | 0.0054 | 0.4744 | 0.0484 | 0.0641 | 0.0007 | 359  | 230 | 394  | 33 | 400  | 4   | 98.5  | 400        | 4  |
| 89K118-13 | 181 | 0.38 | 0.0561 | 0.0016 | 0.4968 | 0.0149 | 0.0642 | 0.0007 | 457  | 62  | 410  | 10 | 401  | 4   | 102.1 | 401        | 4  |
| 89K118-14 | 409 | 0.20 | 0.0546 | 0.0017 | 0.4971 | 0.0323 | 0.0660 | 0.0038 | 397  | 68  | 410  | 22 | 412  | 23  | 99.5  | 412        | 23 |
| 89K118-15 | 284 | 0.36 | 0.0546 | 0.0018 | 0.4902 | 0.0191 | 0.0651 | 0.0014 | 396  | 75  | 405  | 13 | 407  | 8   | 99.6  | 407        | 8  |
| 89K118-16 | 162 | 1.43 | 0.0607 | 0.0026 | 0.8095 | 0.0348 | 0.0967 | 0.0010 | 630  | 91  | 602  | 20 | 595  | 6   | 101.2 | 595        | 6  |
| 89K118-17 | 118 | 0.67 | 0.0567 | 0.0056 | 0.5492 | 0.0544 | 0.0703 | 0.0008 | 480  | 218 | 445  | 36 | 438  | 5   | 101.6 | 438        | 5  |
| 89K118-18 | 70  | 0.14 | 0.0690 | 0.0026 | 1.481  | 0.0607 | 0.1557 | 0.0026 | 899  | 77  | 923  | 25 | 933  | 15  | 98.9  | 933        | 15 |
| 89K118-19 | 234 | 0.83 | 0.0557 | 0.0013 | 0.5136 | 0.0128 | 0.0669 | 0.0007 | 441  | 51  | 421  | 9  | 417  | 4   | 100.9 | 417        | 4  |
| 89K118-20 | 177 | 0.48 | 0.0652 | 0.0020 | 0.8028 | 0.0249 | 0.0894 | 0.0005 | 780  | 65  | 598  | 14 | 552  | 3   | 108.5 | 552        | 3  |
| 89K118-21 | 423 | 0.38 | 0.0568 | 0.0012 | 0.6019 | 0.0132 | 0.0768 | 0.0006 | 485  | 45  | 478  | 8  | 477  | 4   | 100.3 | 477        | 4  |
| 89K118-22 | 209 | 0.43 | 0.0565 | 0.0034 | 0.4883 | 0.0317 | 0.0627 | 0.0016 | 473  | 132 | 404  | 22 | 392  | 10  | 103.1 | 392        | 10 |
| 89K118-23 | 202 | 0.45 | 0.0859 | 0.0004 | 2.678  | 0.0268 | 0.2262 | 0.0018 | 1335 | 10  | 1322 | 7  | 1315 | 10  | 101.6 | 1335       | 10 |
| 89K118-24 | 70  | 0.67 | 0.0870 | 0.0030 | 2.799  | 0.0980 | 0.2333 | 0.0016 | 1361 | 66  | 1355 | 26 | 1352 | 9   | 100.7 | 1361       | 66 |
| 89K118-26 | 218 | 0.77 | 0.0567 | 0.0041 | 0.5496 | 0.0423 | 0.0703 | 0.0018 | 479  | 161 | 445  | 28 | 438  | 11  | 101.5 | 438        | 11 |
| 89K118-28 | 611 | 0.56 | 0.0556 | 0.0007 | 0.5474 | 0.0104 | 0.0714 | 0.0009 | 438  | 30  | 443  | 7  | 444  | 6   | 99.8  | 444        | 6  |
| 89K118-29 | 365 | 0.67 | 0.0670 | 0.0005 | 1.260  | 0.0202 | 0.1364 | 0.0019 | 839  | 17  | 828  | 9  | 824  | 11  | 100.5 | 824        | 11 |
| 89K118-30 | 157 | 1.11 | 0.0561 | 0.0017 | 0.5281 | 0.0190 | 0.0683 | 0.0013 | 456  | 67  | 431  | 13 | 426  | 8   | 101.1 | 426        | 8  |
| 89K118-31 | 286 | 0.48 | 0.0539 | 0.0018 | 0.5325 | 0.0224 | 0.0716 | 0.0018 | 368  | 77  | 434  | 15 | 446  | 11  | 97.2  | 446        | 11 |
| 89K118-33 | 191 | 0.53 | 0.0694 | 0.0009 | 1.510  | 0.0317 | 0.1577 | 0.0025 | 911  | 28  | 934  | 13 | 944  | 14  | 99.0  | 944        | 14 |
| 89K118-34 | 91  | 1.25 | 0.0663 | 0.0028 | 1.189  | 0.0547 | 0.1301 | 0.0023 | 815  | 88  | 796  | 25 | 789  | 13  | 100.9 | 789        | 13 |
| 89K118-35 | 402 | 1.00 | 0.1650 | 0.0008 | 10.659 | 0.1386 | 0.4686 | 0.0056 | 2507 | 8   | 2494 | 12 | 2478 | 26  | 101.2 | 2507       | 8  |
| 89K118-36 | 197 | 0.71 | 0.0539 | 0.0017 | 0.5005 | 0.0160 | 0.0673 | 0.0003 | 367  | 71  | 412  | 11 | 420  | 2   | 98.1  | 420        | 2  |
| 89K118-37 | 403 | 0.28 | 0.0921 | 0.0003 | 3.220  | 0.0258 | 0.2536 | 0.0018 | 1469 | 7   | 1462 | 6  | 1457 | 9   | 100.8 | 1469       | 7  |
| 89K118-38 | 474 | 0.63 | 0.0661 | 0.0011 | 1.210  | 0.0254 | 0.1328 | 0.0016 | 810  | 35  | 805  | 11 | 804  | 9   | 100.2 | 804        | 9  |
| 89K118-39 | 150 | 0.50 | 0.0570 | 0.0015 | 0.5735 | 0.0184 | 0.0730 | 0.0012 | 492  | 59  | 460  | 12 | 454  | 8   | 101.4 | 454        | 8  |
| 89K118-40 | 231 | 0.91 | 0.0671 | 0.0005 | 1.275  | 0.0242 | 0.1379 | 0.0025 | 840  | 14  | 835  | 11 | 833  | 14  | 100.2 | 833        | 14 |
| 89K118-41 | 132 | 0.42 | 0.0567 | 0.0031 | 0.5623 | 0.0309 | 0.0719 | 0.0007 | 481  | 121 | 453  | 20 | 448  | 4   | 101.2 | 448        | 4  |
| 89K118-42 | 412 | 0.50 | 0.0550 | 0.0017 | 0.5390 | 0.0189 | 0.0711 | 0.0013 | 413  | 68  | 438  | 13 | 443  | 8   | 98.9  | 443        | 8  |
| 89K118-43 | 305 | 0.59 | 0.0546 | 0.0019 | 0.5013 | 0.0185 | 0.0666 | 0.0009 | 395  | 76  | 413  | 12 | 416  | 6   | 99.2  | 416        | 6  |
| 89K118-44 | 115 | 0.91 | 0.0546 | 0.0033 | 0.4904 | 0.0299 | 0.0652 | 0.0003 | 395  | 136 | 405  | 20 | 407  | 2   | 99.6  | 407        | 2  |
| 89K118-45 | 157 | 0.77 | 0.0641 | 0.0141 | 0.4510 | 0.1001 | 0.0511 | 0.0015 | 744  | 470 | 378  | 70 | 321  | 9   | 117.8 | Discordant |    |
| 89K118-46 | 301 | 0.45 | 0.0542 | 0.0018 | 0.4970 | 0.0179 | 0.0664 | 0.0007 | 381  | 77  | 410  | 12 | 415  | 4   | 98.8  | 415        | 4  |
| 89K118-47 | 212 | 0.59 | 0.0569 | 0.0041 | 0.5117 | 0.0379 | 0.0652 | 0.0012 | 489  | 159 | 420  | 26 | 407  | 7   | 103.1 | 407        | 7  |
| 89K118-48 | 181 | 0.45 | 0.0564 | 0.0008 | 0.5040 | 0.0081 | 0.0648 | 0.0003 | 468  | 34  | 414  | 5  | 405  | 2   | 102.4 | 405        | 2  |
| 89K118-49 | 307 | 0.37 | 0.0536 | 0.0020 | 0.4740 | 0.0237 | 0.0641 | 0.0021 | 355  | 86  | 394  | 16 | 401  | 13  | 98.3  | 401        | 13 |
| 89K118-50 | 153 | 0.48 | 0.0554 | 0.0035 | 0.5144 | 0.0329 | 0.0674 | 0.0002 | 427  | 142 | 421  | 22 | 420  | 1   | 100.2 | 420        | 1  |
| 89K118-52 | 280 | 0.56 | 0.0553 | 0.0016 | 0.4718 | 0.0165 | 0.0618 | 0.0012 | 426  | 65  | 392  | 11 | 387  | 7   | 101.4 | 387        | 7  |
| 89K118-53 | 73  | 0.50 | 0.0613 | 0.0038 | 0.9992 | 0.0629 | 0.1183 | 0.0015 | 648  | 133 | 703  | 32 | 721  | 9   | 97.6  | 721        | 9  |
| 89K118-56 | 415 | 0.53 | 0.0548 | 0.0014 | 0.5196 | 0.0135 | 0.0687 | 0.0005 | 405  | 56  | 425  | 9  | 429  | 3   | 99.1  | 429        | 3  |
| 89K118-57 | 136 | 0.53 | 0.0532 | 0.0035 | 0.4859 | 0.0335 | 0.0662 | 0.0012 | 338  | 151 | 402  | 23 | 413  | 7   | 97.3  | 413        | 7  |
| 89K118-57 | 56  | 0.77 | 0.0545 | 0.0121 | 0.6458 | 0.1427 | 0.0859 | 0.0017 | 393  | 500 | 506  | 89 | 531  | 10  | 95.2  | 531        | 10 |
| 89K118-58 | 315 | 0.32 | 0.2011 | 0.0014 | 15.111 | 0.5893 | 0.5449 | 0.0213 | 2835 | 12  | 2822 | 38 | 2804 | 88  | 101.1 | 2835       | 12 |
| 89K118-59 | 139 | 0.59 | 0.1378 | 0.0007 | 7.823  | 0.1095 | 0.4119 | 0.0054 | 2199 | 9   | 2211 | 12 | 2224 | 24  | 98.9  | 2199       | 9  |
| 89K118-60 | 267 | 0.50 | 0.0578 | 0.0039 | 0.5622 | 0.0382 | 0.0705 | 0.0008 | 524  | 146 | 453  | 25 | 439  | 5   | 103.1 | 439        | 5  |
| 89K118-61 | 298 | 0.24 | 0.1085 | 0.0014 | 4.575  | 0.0686 | 0.3059 | 0.0018 | 1774 | 25  | 1745 | 12 | 1720 | 9   | 103.1 | 1774       | 25 |
| 89K118-62 | 218 | 0.15 | 0.0857 | 0.0006 | 2.705  | 0.0298 | 0.2290 | 0.0021 | 1331 | 14  | 1330 | 8  | 1329 | 10  | 100.1 | 1331       | 14 |
| 89K118-64 | 332 | 0.13 | 0.0694 | 0.0028 | 1.310  | 0.0983 | 0.1370 | 0.0086 | 909  | 85  | 850  | 43 | 828  | 49  | 102.7 | 828        | 49 |
| 89K118-65 | 120 | 0.48 | 0.0528 | 0.0039 | 0.5375 | 0.0398 | 0.0739 | 0.0004 | 318  | 169 | 437  | 26 | 460  | 2   | 95.0  | 460        | 2  |
| 89K118-66 | 131 | 1.00 | 0.0589 | 0.0027 | 0.7659 | 0.0375 | 0.0943 | 0.0016 | 563  | 99  | 577  | 21 | 581  | 9   | 99.4  | 581        | 9  |
| 89K118-67 | 248 | 0.91 | 0.0551 | 0.0034 | 0.5121 | 0.0323 | 0.0674 | 0.0009 | 416  | 139 | 420  | 22 | 421  | 5   | 99.9  | 421        | 5  |
| 89K118-68 | 260 | 0.71 | 0.0539 | 0.0020 | 0.5113 | 0.0194 | 0.0688 | 0.0006 | 369  | 84  | 419  | 13 | 429  | 4   | 97.9  | 429        | 4  |
| 89K118-69 | 154 | 0.31 | 0.0550 | 0.0061 | 0.4682 | 0.0520 | 0.0617 | 0.0010 | 413  | 246 | 390  | 36 | 386  | 6   | 101.0 | 386        | 6  |
| 89K118-70 | 270 | 0.63 | 0.0880 | 0.0017 | 2.783  | 0.0891 | 0.2293 | 0.0060 | 1384 | 36  | 1351 | 24 | 1331 | 31  | 104.0 | 1384       | 36 |
| 89K118-71 | 29  | 0.83 | 0.2538 | 0.0056 | 20.431 | 1.001  | 0.5839 | 0.0257 | 3209 | 35  | 3112 | 48 | 2965 | 104 | 108.2 | 3209       | 35 |
| 89K118-72 | 201 | 0.56 | 0.0565 | 0.0035 | 0.5498 | 0.0341 | 0.0705 | 0.0005 | 473  | 137 | 445  | 23 | 439  | 3   | 101.3 | 439        | 3  |
| 89K118-73 | 164 | 0.67 | 0.0521 | 0.0035 | 0.4835 | 0.0334 | 0.0673 | 0.0006 | 289  | 157 | 401  | 23 | 420  | 4   | 95.3  | 420        |    |

|           |     |      |      |        |        |        |        |        |        |      |     |      |    |      |    |       |            |    |
|-----------|-----|------|------|--------|--------|--------|--------|--------|--------|------|-----|------|----|------|----|-------|------------|----|
| LT45C-015 | 289 | 356  | 0.81 | 0.0571 | 0.0015 | 0.5330 | 0.0140 | 0.0677 | 0.0009 | 495  | 53  | 434  | 9  | 422  | 6  | 102.8 | 422        | 6  |
| LT45C-016 | 99  | 123  | 0.80 | 0.0543 | 0.0020 | 0.5330 | 0.0200 | 0.0713 | 0.0011 | 382  | 80  | 434  | 13 | 444  | 6  | 97.7  | 444        | 6  |
| LT45C-017 | 59  | 72   | 0.82 | 0.0554 | 0.0026 | 0.5130 | 0.0240 | 0.0671 | 0.0011 | 430  | 100 | 420  | 16 | 419  | 7  | 100.2 | 419        | 7  |
| LT45C-018 | 119 | 166  | 0.72 | 0.0759 | 0.0022 | 1.702  | 0.0630 | 0.1625 | 0.0024 | 1093 | 56  | 1009 | 24 | 971  | 13 | 103.9 | 971        | 13 |
| LT45C-019 | 36  | 115  | 0.31 | 0.0927 | 0.0022 | 2.971  | 0.0710 | 0.2325 | 0.0032 | 1482 | 42  | 1400 | 18 | 1347 | 17 | 110.0 | Discordant |    |
| LT45C-020 | 24  | 46   | 0.51 | 0.0512 | 0.0033 | 0.4800 | 0.0300 | 0.0680 | 0.0012 | 249  | 139 | 398  | 21 | 424  | 7  | 93.9  | 424        | 7  |
| LT45C-021 | 36  | 54   | 0.66 | 0.0565 | 0.0030 | 0.5320 | 0.0280 | 0.0683 | 0.0012 | 473  | 112 | 433  | 18 | 426  | 7  | 101.6 | 426        | 7  |
| LT45C-022 | 130 | 254  | 0.51 | 0.0583 | 0.0017 | 0.5560 | 0.0160 | 0.0692 | 0.0010 | 543  | 59  | 449  | 10 | 431  | 6  | 104.2 | 431        | 6  |
| LT45C-023 | 156 | 299  | 0.52 | 0.0597 | 0.0021 | 0.5640 | 0.0240 | 0.0686 | 0.0010 | 591  | 74  | 454  | 16 | 428  | 6  | 106.1 | 428        | 6  |
| LT45C-024 | 56  | 126  | 0.44 | 0.0608 | 0.0021 | 0.6260 | 0.0220 | 0.0747 | 0.0011 | 633  | 71  | 494  | 14 | 465  | 7  | 106.2 | 465        | 7  |
| LT45C-025 | 116 | 178  | 0.65 | 0.0572 | 0.0018 | 0.5830 | 0.0190 | 0.0739 | 0.0011 | 498  | 67  | 466  | 12 | 460  | 6  | 101.3 | 460        | 6  |
| LT45C-026 | 121 | 91   | 1.34 | 0.0943 | 0.0022 | 3.569  | 0.0870 | 0.2746 | 0.0038 | 1514 | 43  | 1543 | 19 | 1564 | 19 | 96.8  | 1514       | 43 |
| LT45C-027 | 56  | 147  | 0.38 | 0.0564 | 0.0023 | 0.3830 | 0.0150 | 0.0493 | 0.0008 | 466  | 86  | 329  | 11 | 310  | 5  | 106.1 | 310        | 5  |
| LT45C-028 | 45  | 223  | 0.20 | 0.0802 | 0.0018 | 2.301  | 0.0520 | 0.2082 | 0.0028 | 1202 | 41  | 1213 | 16 | 1219 | 15 | 98.6  | 1202       | 41 |
| LT45C-029 | 171 | 273  | 0.63 | 0.0555 | 0.0016 | 0.5350 | 0.0150 | 0.0700 | 0.0010 | 431  | 61  | 435  | 10 | 436  | 6  | 99.8  | 436        | 6  |
| LT45C-030 | 22  | 42   | 0.51 | 0.0505 | 0.0032 | 0.4880 | 0.0300 | 0.0701 | 0.0013 | 219  | 136 | 404  | 21 | 437  | 8  | 92.4  | 437        | 8  |
| LT45C-031 | 195 | 292  | 0.67 | 0.0588 | 0.0016 | 0.5640 | 0.0160 | 0.0696 | 0.0010 | 559  | 57  | 454  | 10 | 434  | 6  | 104.6 | 434        | 6  |
| LT45C-032 | 283 | 401  | 0.71 | 0.0783 | 0.0016 | 2.101  | 0.0450 | 0.1946 | 0.0026 | 1156 | 39  | 1149 | 15 | 1146 | 14 | 100.9 | 1156       | 39 |
| LT45C-033 | 65  | 134  | 0.48 | 0.0543 | 0.0020 | 0.5230 | 0.0190 | 0.0699 | 0.0011 | 382  | 79  | 427  | 13 | 436  | 6  | 97.9  | 436        | 6  |
| LT45C-034 | 100 | 171  | 0.58 | 0.0554 | 0.0018 | 0.5350 | 0.0180 | 0.0700 | 0.0010 | 428  | 70  | 435  | 12 | 436  | 6  | 99.8  | 436        | 6  |
| LT45C-035 | 308 | 347  | 0.89 | 0.0552 | 0.0015 | 0.5150 | 0.0140 | 0.0677 | 0.0009 | 418  | 58  | 422  | 9  | 422  | 6  | 100.0 | 422        | 6  |
| LT45C-036 | 135 | 83   | 1.62 | 0.0649 | 0.0021 | 1.247  | 0.0400 | 0.1394 | 0.0021 | 770  | 65  | 822  | 18 | 841  | 12 | 97.7  | 841        | 12 |
| LT45C-037 | 66  | 105  | 0.63 | 0.0568 | 0.0023 | 0.5300 | 0.0210 | 0.0676 | 0.0011 | 485  | 86  | 432  | 14 | 422  | 6  | 102.4 | 422        | 6  |
| LT45C-038 | 205 | 228  | 0.90 | 0.0591 | 0.0017 | 0.6110 | 0.0180 | 0.0750 | 0.0011 | 569  | 61  | 484  | 11 | 466  | 6  | 103.9 | 466        | 6  |
| LT45C-039 | 96  | 201  | 0.48 | 0.0586 | 0.0019 | 0.5700 | 0.0180 | 0.0707 | 0.0010 | 551  | 66  | 458  | 12 | 440  | 6  | 104.1 | 440        | 6  |
| LT45C-040 | 36  | 73   | 0.49 | 0.0654 | 0.0029 | 0.6920 | 0.0300 | 0.0768 | 0.0013 | 787  | 89  | 534  | 18 | 477  | 8  | 111.9 | Discordant |    |
| LT45C-041 | 151 | 122  | 1.23 | 0.0677 | 0.0019 | 1.255  | 0.0360 | 0.1345 | 0.0019 | 858  | 56  | 826  | 16 | 813  | 11 | 101.6 | 813        | 11 |
| LT45C-042 | 122 | 132  | 0.93 | 0.0688 | 0.0019 | 1.303  | 0.0370 | 0.1374 | 0.0020 | 892  | 55  | 847  | 16 | 830  | 11 | 102.0 | 830        | 11 |
| LT45C-043 | 186 | 539  | 0.35 | 0.0521 | 0.0014 | 0.3390 | 0.0090 | 0.0473 | 0.0007 | 288  | 60  | 297  | 7  | 298  | 4  | 99.7  | 298        | 4  |
| LT45C-044 | 325 | 387  | 0.84 | 0.0589 | 0.0015 | 0.6210 | 0.0160 | 0.0765 | 0.0011 | 562  | 54  | 490  | 10 | 475  | 6  | 103.2 | 475        | 6  |
| LT45C-045 | 181 | 363  | 0.50 | 0.0583 | 0.0016 | 0.5890 | 0.0160 | 0.0732 | 0.0010 | 542  | 56  | 470  | 10 | 455  | 6  | 103.3 | 455        | 6  |
| LT45C-046 | 174 | 313  | 0.56 | 0.0723 | 0.0017 | 1.646  | 0.0390 | 0.1652 | 0.0023 | 993  | 45  | 988  | 15 | 986  | 12 | 100.2 | 986        | 12 |
| LT45C-047 | 27  | 32   | 0.83 | 0.1088 | 0.0032 | 4.922  | 0.1460 | 0.3280 | 0.0051 | 1780 | 51  | 1806 | 25 | 1829 | 25 | 97.3  | 1780       | 51 |
| LT45C-048 | 857 | 274  | 3.13 | 0.0612 | 0.0016 | 0.8360 | 0.0230 | 0.0991 | 0.0014 | 646  | 55  | 617  | 13 | 609  | 8  | 101.3 | 609        | 8  |
| LT45C-049 | 133 | 145  | 0.92 | 0.1625 | 0.0035 | 10.795 | 0.2420 | 0.4818 | 0.0066 | 2482 | 35  | 2506 | 21 | 2535 | 29 | 97.9  | 2482       | 35 |
| LT45C-050 | 47  | 122  | 0.39 | 0.0517 | 0.0024 | 0.3400 | 0.0160 | 0.0477 | 0.0008 | 273  | 101 | 298  | 12 | 301  | 5  | 99.0  | 301        | 5  |
| LT45C-051 | 62  | 115  | 0.54 | 0.0575 | 0.0025 | 0.4590 | 0.0190 | 0.0579 | 0.0009 | 510  | 90  | 384  | 14 | 363  | 6  | 105.8 | 363        | 6  |
| LT45C-052 | 99  | 189  | 0.52 | 0.1754 | 0.0039 | 12.115 | 0.2730 | 0.5008 | 0.0068 | 2610 | 35  | 2613 | 21 | 2617 | 29 | 99.7  | 2610       | 35 |
| LT45C-053 | 33  | 46   | 0.71 | 0.0711 | 0.0029 | 1.279  | 0.0520 | 0.1305 | 0.0022 | 959  | 80  | 836  | 23 | 791  | 12 | 105.7 | 791        | 12 |
| LT45C-054 | 166 | 77   | 2.15 | 0.0695 | 0.0024 | 1.315  | 0.0450 | 0.1373 | 0.0021 | 913  | 67  | 852  | 20 | 829  | 12 | 102.8 | 829        | 12 |
| LT45C-055 | 56  | 108  | 0.52 | 0.0583 | 0.0024 | 0.5490 | 0.0220 | 0.0683 | 0.0011 | 541  | 85  | 444  | 15 | 426  | 7  | 104.2 | 426        | 7  |
| LT45C-056 | 2   | 134  | 0.02 | 0.0556 | 0.0022 | 0.5050 | 0.0190 | 0.0658 | 0.0010 | 437  | 82  | 415  | 13 | 411  | 6  | 101.0 | 411        | 6  |
| LT45C-057 | 91  | 203  | 0.45 | 0.0578 | 0.0020 | 0.5300 | 0.0180 | 0.0665 | 0.0010 | 521  | 71  | 432  | 12 | 415  | 6  | 104.1 | 415        | 6  |
| LT45C-058 | 48  | 94   | 0.51 | 0.0513 | 0.0023 | 0.5260 | 0.0230 | 0.0743 | 0.0012 | 256  | 98  | 429  | 16 | 462  | 7  | 92.9  | 462        | 7  |
| LT45C-059 | 50  | 137  | 0.36 | 0.0523 | 0.0024 | 0.3340 | 0.0150 | 0.0464 | 0.0008 | 298  | 98  | 293  | 11 | 292  | 5  | 100.3 | 292        | 5  |
| LT45C-060 | 60  | 94   | 0.64 | 0.0559 | 0.0026 | 0.5240 | 0.0240 | 0.0680 | 0.0011 | 447  | 100 | 428  | 16 | 424  | 7  | 100.9 | 424        | 7  |
| LT45C-061 | 86  | 111  | 0.78 | 0.0545 | 0.0023 | 0.5160 | 0.0210 | 0.0686 | 0.0011 | 391  | 88  | 422  | 14 | 428  | 7  | 98.6  | 428        | 7  |
| LT45C-062 | 73  | 193  | 0.38 | 0.0550 | 0.0019 | 0.5740 | 0.0190 | 0.0757 | 0.0011 | 411  | 72  | 461  | 12 | 471  | 7  | 97.9  | 471        | 7  |
| LT45C-063 | 85  | 117  | 0.73 | 0.0623 | 0.0041 | 0.6250 | 0.0460 | 0.0727 | 0.0013 | 685  | 135 | 493  | 29 | 453  | 8  | 108.8 | 453        | 8  |
| LT45C-064 | 84  | 184  | 0.46 | 0.1630 | 0.0039 | 10.840 | 0.2630 | 0.4822 | 0.0067 | 2487 | 38  | 2509 | 23 | 2537 | 29 | 98.0  | 2487       | 38 |
| LT45C-065 | 34  | 340  | 0.10 | 0.0744 | 0.0019 | 1.801  | 0.0460 | 0.1755 | 0.0025 | 1052 | 50  | 1046 | 17 | 1042 | 13 | 101.0 | 1052       | 50 |
| LT45C-066 | 43  | 92   | 0.47 | 0.0533 | 0.0026 | 0.4280 | 0.0200 | 0.0583 | 0.0010 | 339  | 106 | 362  | 14 | 365  | 6  | 99.2  | 365        | 6  |
| LT45C-067 | 122 | 151  | 0.81 | 0.0528 | 0.0019 | 0.5220 | 0.0190 | 0.0717 | 0.0011 | 321  | 81  | 427  | 13 | 446  | 7  | 95.7  | 446        | 7  |
| LT45C-068 | 24  | 49   | 0.49 | 0.1103 | 0.0032 | 4.939  | 0.1450 | 0.3246 | 0.0049 | 1805 | 51  | 1809 | 25 | 1812 | 24 | 99.6  | 1805       | 51 |
| LT45C-069 | 192 | 201  | 0.96 | 0.0670 | 0.0019 | 1.300  | 0.0380 | 0.1406 | 0.0020 | 838  | 58  | 846  | 17 | 848  | 11 | 99.8  | 848        | 11 |
| LT45C-070 | 145 | 278  | 0.52 | 0.0596 | 0.0020 | 0.5470 | 0.0180 | 0.0666 | 0.0010 | 590  | 70  | 443  | 12 | 416  | 6  | 106.5 | 416        | 6  |
| LT45C-071 | 86  | 207  | 0.42 | 0.0737 | 0.0025 | 1.319  | 0.0510 | 0.1299 | 0.0020 | 1032 | 67  | 854  | 22 | 787  | 12 | 108.5 | 787        | 12 |
| LT45C-072 | 51  | 61   | 0.83 | 0.0586 | 0.0044 | 0.5860 | 0.0430 | 0.0725 | 0.0016 | 552  | 161 | 468  | 28 | 451  | 10 | 103.8 | 451        | 10 |
| LT45C-073 | 170 | 274  | 0.62 | 0.0577 | 0.0019 | 0.5310 | 0.0170 | 0.0667 | 0.0010 | 518  | 69  | 432  | 11 | 416  | 6  | 103.8 | 416        | 6  |
| LT45C-074 | 81  | 282  | 0.29 | 0.0686 | 0.0019 | 1.417  | 0.0400 | 0.1497 | 0.0021 | 888  | 56  | 896  | 17 | 899  | 12 | 99.7  | 899        | 12 |
| LT45C-075 | 111 | 214  | 0.52 | 0.0543 | 0.0019 | 0.5100 | 0.0180 | 0.0681 | 0.0010 | 381  | 77  | 418  | 12 | 425  | 6  | 98.4  | 425        | 6  |
| LT45C-076 | 163 | 231  | 0.71 | 0.0785 | 0.0040 | 1.686  | 0.1000 | 0.1559 | 0.0026 | 1158 | 99  | 1003 | 38 | 934  | 14 | 107.4 | 934        | 14 |
| LT45C-077 | 123 | 155  | 0.79 | 0.0554 | 0.0021 | 0.5630 | 0.0210 | 0.0737 | 0.0011 | 427  | 82  | 453  | 14 | 458  | 7  | 98.9  | 458        | 7  |
| LT45C-078 | 83  | 141  | 0.59 | 0.0618 | 0.0025 | 0.5730 | 0.0230 | 0.0673 | 0.0011 | 666  | 84  | 460  | 15 | 420  | 7  | 109.5 | 420        | 7  |
| LT45C-079 | 71  | 65   | 1.09 | 0.1260 | 0.0036 | 6.653  | 0.1890 | 0.3827 | 0.0057 | 2043 | 48  | 2066 | 25 | 2089 | 27 | 97.8  | 2043       | 48 |
| LT45C-080 | 84  | 438  | 0.19 | 0.0579 | 0.0018 | 0.6570 | 0.0200 | 0.0823 | 0.0012 | 527  | 64  | 513  | 12 | 510  | 7  | 100.6 | 510        | 7  |
| LT45C-081 | 290 | 601  | 0.48 | 0.0559 | 0.0017 | 0.5200 | 0.0150 | 0.0674 | 0.0010 | 449  | 64  | 425  | 10 | 421  | 6  | 101.0 | 421        | 6  |
| LT45C-082 | 179 | 266  | 0.67 | 0.0575 | 0.0021 | 0.5720 | 0.0210 | 0.0721 | 0.0011 | 512  | 78  | 459  | 13 | 448  | 7  | 102.5 | 448        | 7  |
| LT45C-083 | 112 | 119  | 0.94 | 0.0539 | 0.0025 | 0.5080 | 0.0240 | 0.0683 | 0.0011 | 368  | 103 | 417  | 16 | 426  | 7  | 97.9  | 426        | 7  |
| LT45C-084 | 91  | 1328 | 0.07 | 0.0659 | 0.0018 | 1.129  | 0.0320 | 0.1242 | 0.0017 | 803  | 54  | 767  | 15 | 755  | 1  |       |            |    |



|          |     |     |      |        |        |        |        |        |        |      |     |      |    |      |    |       |            |    |
|----------|-----|-----|------|--------|--------|--------|--------|--------|--------|------|-----|------|----|------|----|-------|------------|----|
| LT28A-23 | 7   | 19  | 0.39 | 0.2132 | 0.0050 | 15.444 | 0.3890 | 0.5255 | 0.0079 | 2930 | 36  | 2843 | 24 | 2722 | 33 | 107.6 | 2930       | 36 |
| LT28A-24 | 35  | 85  | 0.41 | 0.0539 | 0.0035 | 0.3290 | 0.0230 | 0.0443 | 0.0008 | 366  | 143 | 289  | 17 | 279  | 5  | 103.6 | 279        | 5  |
| LT28A-25 | 351 | 261 | 1.34 | 0.0574 | 0.0015 | 0.5380 | 0.0140 | 0.0680 | 0.0008 | 505  | 55  | 437  | 9  | 424  | 5  | 103.1 | 424        | 5  |
| LT28A-27 | 1   | 12  | 0.09 | 0.0633 | 0.0095 | 0.5880 | 0.0880 | 0.0674 | 0.0017 | 718  | 318 | 470  | 56 | 420  | 10 | 111.9 | Discordant |    |
| LT28A-28 | 104 | 102 | 1.02 | 0.1198 | 0.0032 | 5.279  | 0.1720 | 0.3195 | 0.0044 | 1954 | 45  | 1865 | 28 | 1787 | 21 | 109.3 | 1954       | 45 |
| LT28A-29 | 51  | 90  | 0.57 | 0.0524 | 0.0031 | 0.3350 | 0.0200 | 0.0463 | 0.0007 | 305  | 131 | 293  | 15 | 292  | 5  | 100.3 | 292        | 5  |
| LT28A-32 | 115 | 144 | 0.80 | 0.0657 | 0.0017 | 1.135  | 0.0280 | 0.1253 | 0.0014 | 797  | 52  | 770  | 13 | 761  | 8  | 101.2 | 761        | 8  |
| LT28A-33 | 80  | 447 | 0.18 | 0.1189 | 0.0023 | 4.589  | 0.0910 | 0.2800 | 0.0030 | 1939 | 33  | 1747 | 17 | 1591 | 15 | 121.9 | Discordant |    |
| LT28A-36 | 72  | 91  | 0.79 | 0.0591 | 0.0024 | 0.7660 | 0.0300 | 0.0939 | 0.0013 | 571  | 85  | 577  | 17 | 579  | 8  | 99.7  | 579        | 8  |
| LT28A-37 | 133 | 201 | 0.66 | 0.0696 | 0.0020 | 1.326  | 0.0370 | 0.1381 | 0.0017 | 918  | 57  | 857  | 16 | 834  | 10 | 102.8 | 834        | 10 |
| LT28A-38 | 10  | 570 | 0.02 | 0.0755 | 0.0015 | 1.933  | 0.0380 | 0.1858 | 0.0020 | 1081 | 40  | 1093 | 13 | 1098 | 11 | 98.5  | 1081       | 40 |
| LT28A-39 | 20  | 105 | 0.19 | 0.1849 | 0.0037 | 13.293 | 0.2600 | 0.5214 | 0.0058 | 2697 | 33  | 2701 | 19 | 2705 | 25 | 99.7  | 2697       | 33 |
| LT28A-41 | 510 | 579 | 0.88 | 0.0584 | 0.0015 | 0.5980 | 0.0150 | 0.0743 | 0.0009 | 544  | 55  | 476  | 10 | 462  | 5  | 103.0 | 462        | 5  |
| LT28A-43 | 76  | 175 | 0.44 | 0.1082 | 0.0023 | 4.832  | 0.0990 | 0.3237 | 0.0036 | 1770 | 38  | 1790 | 17 | 1808 | 18 | 97.9  | 1770       | 38 |
| LT28A-44 | 224 | 364 | 0.61 | 0.0594 | 0.0018 | 0.6060 | 0.0180 | 0.0740 | 0.0009 | 581  | 65  | 481  | 11 | 460  | 5  | 104.6 | 460        | 5  |
| LT28A-45 | 353 | 513 | 0.69 | 0.1178 | 0.0024 | 5.684  | 0.1120 | 0.3498 | 0.0038 | 1923 | 36  | 1929 | 17 | 1934 | 18 | 99.4  | 1923       | 36 |
| LT28A-46 | 414 | 547 | 0.76 | 0.0679 | 0.0015 | 1.418  | 0.0290 | 0.1515 | 0.0017 | 864  | 44  | 896  | 12 | 909  | 9  | 98.6  | 909        | 9  |
| LT28A-50 | 18  | 34  | 0.53 | 0.0638 | 0.0066 | 0.4170 | 0.0450 | 0.0474 | 0.0011 | 736  | 219 | 354  | 32 | 298  | 7  | 118.8 | Discordant |    |
| LT28A-52 | 106 | 143 | 0.74 | 0.0677 | 0.0018 | 1.262  | 0.0330 | 0.1351 | 0.0016 | 860  | 54  | 829  | 15 | 817  | 9  | 101.5 | 817        | 9  |
| LT28A-54 | 70  | 123 | 0.57 | 0.0651 | 0.0018 | 1.136  | 0.0310 | 0.1266 | 0.0015 | 777  | 58  | 771  | 15 | 768  | 9  | 100.4 | 768        | 9  |
| LT28A-55 | 229 | 327 | 0.70 | 0.0691 | 0.0016 | 1.336  | 0.0310 | 0.1402 | 0.0016 | 902  | 48  | 862  | 13 | 846  | 9  | 101.9 | 846        | 9  |
| LT28A-56 | 123 | 150 | 0.82 | 0.1137 | 0.0026 | 5.206  | 0.1150 | 0.3319 | 0.0038 | 1860 | 40  | 1854 | 19 | 1848 | 18 | 100.6 | 1860       | 40 |
| LT28A-57 | 148 | 372 | 0.40 | 0.0558 | 0.0017 | 0.3630 | 0.0110 | 0.0472 | 0.0006 | 445  | 66  | 315  | 8  | 297  | 4  | 106.1 | 297        | 4  |
| LT28A-58 | 83  | 132 | 0.63 | 0.0672 | 0.0018 | 1.383  | 0.0360 | 0.1493 | 0.0018 | 842  | 54  | 882  | 15 | 897  | 10 | 98.3  | 897        | 10 |
| LT28A-59 | 160 | 365 | 0.44 | 0.0634 | 0.0017 | 0.7910 | 0.0210 | 0.0905 | 0.0011 | 721  | 57  | 592  | 12 | 558  | 6  | 106.1 | 558        | 6  |
| LT28A-60 | 150 | 129 | 1.16 | 0.0564 | 0.0019 | 0.5560 | 0.0190 | 0.0714 | 0.0009 | 470  | 75  | 449  | 12 | 444  | 5  | 101.1 | 444        | 5  |

Sample NJ11-006, sandstone, Early Permian Xiaotikanlike Formation in Kapushaliang section of STB, Liu Dongdong-Tectonophysics-2013

|         |      |        |        |        |        |        |        |      |     |      |     |      |    |       |            |    |
|---------|------|--------|--------|--------|--------|--------|--------|------|-----|------|-----|------|----|-------|------------|----|
| NJ06-01 | 0.45 | 0.0524 | 0.0080 | 0.3422 | 0.0520 | 0.0474 | 0.0009 | 301  | 302 | 299  | 39  | 298  | 6  | 100.3 | 298        | 6  |
| NJ06-02 | 0.48 | 0.0521 | 0.0045 | 0.3292 | 0.0286 | 0.0458 | 0.0008 | 289  | 166 | 289  | 22  | 289  | 5  | 100.0 | 289        | 5  |
| NJ06-03 | 0.50 | 0.0519 | 0.0186 | 0.3250 | 0.1161 | 0.0454 | 0.0013 | 281  | 587 | 286  | 89  | 286  | 8  | 100.0 | 286        | 8  |
| NJ06-04 | 0.47 | 0.0525 | 0.0058 | 0.3537 | 0.0388 | 0.0489 | 0.0008 | 307  | 216 | 307  | 29  | 307  | 5  | 100.0 | 307        | 5  |
| NJ06-05 | 0.55 | 0.0521 | 0.0031 | 0.3373 | 0.0197 | 0.0469 | 0.0007 | 292  | 107 | 295  | 15  | 296  | 4  | 99.7  | 296        | 4  |
| NJ06-06 | 0.51 | 0.0523 | 0.0043 | 0.3460 | 0.0285 | 0.0480 | 0.0008 | 298  | 157 | 302  | 22  | 302  | 5  | 100.0 | 302        | 5  |
| NJ06-07 | 0.65 | 0.0523 | 0.0037 | 0.3382 | 0.0237 | 0.0469 | 0.0007 | 300  | 132 | 296  | 18  | 295  | 5  | 100.3 | 295        | 5  |
| NJ06-08 | 0.71 | 0.0522 | 0.0024 | 0.3370 | 0.0156 | 0.0468 | 0.0007 | 293  | 79  | 295  | 12  | 295  | 4  | 100.0 | 295        | 4  |
| NJ06-09 | 0.68 | 0.0523 | 0.0041 | 0.3163 | 0.0243 | 0.0438 | 0.0008 | 300  | 141 | 279  | 19  | 276  | 5  | 101.1 | 276        | 5  |
| NJ06-10 | 0.18 | 0.1771 | 0.0067 | 12.325 | 0.4649 | 0.5047 | 0.0073 | 2626 | 43  | 2629 | 35  | 2634 | 31 | 99.7  | 2626       | 43 |
| NJ06-11 | 0.71 | 0.0546 | 0.0061 | 0.4918 | 0.0547 | 0.0654 | 0.0015 | 394  | 208 | 406  | 37  | 408  | 9  | 99.5  | 408        | 9  |
| NJ06-12 | 0.56 | 0.0521 | 0.0031 | 0.3272 | 0.0196 | 0.0455 | 0.0007 | 291  | 109 | 287  | 15  | 287  | 4  | 100.0 | 287        | 4  |
| NJ06-13 | 0.51 | 0.0524 | 0.0048 | 0.3444 | 0.0314 | 0.0477 | 0.0008 | 302  | 177 | 301  | 24  | 300  | 5  | 100.3 | 300        | 5  |
| NJ06-14 | 0.66 | 0.0522 | 0.0052 | 0.3324 | 0.0332 | 0.0462 | 0.0008 | 292  | 194 | 291  | 25  | 291  | 5  | 100.0 | 291        | 5  |
| NJ06-15 | 2.50 | 0.0555 | 0.0037 | 0.5195 | 0.0349 | 0.0679 | 0.0011 | 431  | 123 | 425  | 23  | 424  | 6  | 100.2 | 424        | 6  |
| NJ06-16 | 0.53 | 0.0524 | 0.0129 | 0.3416 | 0.0839 | 0.0473 | 0.0011 | 302  | 422 | 298  | 63  | 298  | 7  | 100.0 | 298        | 7  |
| NJ06-17 | 0.62 | 0.0518 | 0.0057 | 0.3138 | 0.0342 | 0.0439 | 0.0008 | 277  | 214 | 277  | 26  | 277  | 5  | 100.0 | 277        | 5  |
| NJ06-18 | 0.58 | 0.0521 | 0.0129 | 0.3264 | 0.0805 | 0.0455 | 0.0010 | 288  | 423 | 287  | 62  | 287  | 6  | 100.0 | 287        | 6  |
| NJ06-20 | 1.54 | 0.0970 | 0.0082 | 0.6349 | 0.0524 | 0.0475 | 0.0008 | 1566 | 164 | 499  | 33  | 299  | 5  | 166.9 | Discordant |    |
| NJ06-21 | 0.39 | 0.0523 | 0.0024 | 0.3447 | 0.0154 | 0.0478 | 0.0007 | 299  | 75  | 301  | 12  | 301  | 4  | 100.0 | 301        | 4  |
| NJ06-22 | 0.52 | 0.0546 | 0.0024 | 0.5136 | 0.0223 | 0.0682 | 0.0010 | 395  | 71  | 421  | 15  | 426  | 6  | 98.8  | 426        | 6  |
| NJ06-23 | 0.52 | 0.0519 | 0.0040 | 0.3284 | 0.0252 | 0.0459 | 0.0007 | 281  | 146 | 288  | 19  | 289  | 5  | 99.7  | 289        | 5  |
| NJ06-24 | 0.48 | 0.0522 | 0.0028 | 0.3347 | 0.0179 | 0.0465 | 0.0007 | 292  | 94  | 293  | 14  | 293  | 4  | 100.0 | 293        | 4  |
| NJ06-25 | 0.69 | 0.0530 | 0.0068 | 0.3799 | 0.0485 | 0.0519 | 0.0011 | 330  | 250 | 327  | 36  | 326  | 7  | 100.3 | 326        | 7  |
| NJ06-26 | 0.54 | 0.0524 | 0.0028 | 0.3483 | 0.0186 | 0.0482 | 0.0007 | 305  | 94  | 303  | 14  | 303  | 4  | 100.0 | 303        | 4  |
| NJ06-27 | 0.46 | 0.0524 | 0.0077 | 0.3558 | 0.0522 | 0.0493 | 0.0010 | 302  | 293 | 309  | 39  | 310  | 6  | 99.7  | 310        | 6  |
| NJ06-28 | 0.59 | 0.0524 | 0.0029 | 0.3463 | 0.0191 | 0.0479 | 0.0007 | 304  | 97  | 302  | 14  | 302  | 5  | 100.0 | 302        | 5  |
| NJ06-29 | 0.49 | 0.0523 | 0.0101 | 0.3198 | 0.0614 | 0.0443 | 0.0010 | 298  | 349 | 282  | 47  | 280  | 6  | 100.7 | 280        | 6  |
| NJ06-30 | 0.52 | 0.0523 | 0.0097 | 0.3439 | 0.0633 | 0.0477 | 0.0010 | 297  | 337 | 300  | 48  | 300  | 6  | 100.0 | 300        | 6  |
| NJ06-31 | 0.73 | 0.0537 | 0.0031 | 0.4264 | 0.0243 | 0.0576 | 0.0009 | 357  | 100 | 361  | 17  | 361  | 6  | 100.0 | 361        | 6  |
| NJ06-32 | 0.53 | 0.0523 | 0.0064 | 0.3429 | 0.0415 | 0.0475 | 0.0009 | 299  | 241 | 299  | 31  | 299  | 5  | 100.0 | 299        | 5  |
| NJ06-33 | 0.74 | 0.0544 | 0.0043 | 0.4560 | 0.0354 | 0.0607 | 0.0011 | 389  | 142 | 381  | 25  | 380  | 7  | 100.3 | 380        | 7  |
| NJ06-34 | 0.58 | 0.0523 | 0.0049 | 0.3457 | 0.0325 | 0.0480 | 0.0008 | 296  | 182 | 301  | 25  | 302  | 5  | 99.7  | 302        | 5  |
| NJ06-35 | 0.72 | 0.0520 | 0.0027 | 0.3229 | 0.0167 | 0.0450 | 0.0007 | 286  | 90  | 284  | 13  | 284  | 4  | 100.0 | 284        | 4  |
| NJ06-36 | 0.55 | 0.0521 | 0.0126 | 0.3346 | 0.0806 | 0.0466 | 0.0011 | 289  | 412 | 293  | 61  | 294  | 7  | 99.7  | 294        | 7  |
| NJ06-37 | 0.83 | 0.0520 | 0.0027 | 0.3360 | 0.0176 | 0.0468 | 0.0007 | 286  | 92  | 294  | 13  | 295  | 4  | 99.7  | 295        | 4  |
| NJ06-38 | 0.65 | 0.0519 | 0.0029 | 0.3099 | 0.0170 | 0.0433 | 0.0007 | 279  | 98  | 274  | 13  | 273  | 4  | 100.4 | 273        | 4  |
| NJ06-39 | 0.88 | 0.0521 | 0.0027 | 0.3354 | 0.0172 | 0.0467 | 0.0007 | 290  | 89  | 294  | 13  | 294  | 4  | 100.0 | 294        | 4  |
| NJ06-40 | 0.94 | 0.0518 | 0.0053 | 0.3145 | 0.0319 | 0.0440 | 0.0007 | 277  | 198 | 278  | 25  | 278  | 5  | 100.0 | 278        | 5  |
| NJ06-41 | 0.51 | 0.0520 | 0.0076 | 0.3286 | 0.0480 | 0.0458 | 0.0008 | 287  | 291 | 289  | 37  | 289  | 5  | 100.0 | 289        | 5  |
| NJ06-42 | 0.62 | 0.0520 | 0.0035 | 0.3276 | 0.0216 | 0.0457 | 0.0007 | 285  | 122 | 288  | 17  | 288  | 4  | 100.0 | 288        | 4  |
| NJ06-43 | 0.72 | 0.0520 | 0.0044 | 0.3360 | 0.0284 | 0.0468 | 0.0008 | 287  | 160 | 294  | 22  | 295  | 5  | 99.7  | 295        | 5  |
| NJ06-44 | 0.47 | 0.0524 | 0.0062 | 0.3404 | 0.0399 | 0.0471 | 0.0009 | 304  | 231 | 297  | 30  | 297  | 5  | 100.0 | 297        | 5  |
| NJ06-45 | 0.51 | 0.0538 | 0.0121 | 0.4166 | 0.0932 | 0.0561 | 0.0016 | 364  | 392 | 354  | 67  | 352  | 10 | 100.6 | 352        | 10 |
| NJ06-46 | 0.47 | 0.0520 | 0.0044 | 0.3253 | 0.0276 | 0.0454 | 0.0008 | 284  | 162 | 286  | 21  | 286  | 5  | 100.0 | 286        | 5  |
| NJ06-47 | 0.72 | 0.0528 | 0.0031 | 0.3509 | 0.0207 | 0.0482 | 0.0008 | 318  | 106 | 305  | 16  | 304  | 5  | 100.3 | 304        | 5  |
| NJ06-48 | 0.56 | 0.0521 | 0.0122 | 0.3359 | 0.0785 | 0.0467 | 0.0011 | 290  | 402 | 294  | 60  | 294  | 7  | 100.0 | 294        | 7  |
| NJ06-49 | 0.70 | 0.0526 | 0.0098 | 0.3424 | 0.0635 | 0.0473 | 0.0009 | 309  | 341 | 299  | 48  | 298  | 6  | 100.3 | 298        | 6  |
| NJ06-50 | 0.79 | 0.0523 | 0.0026 | 0.3426 | 0.0170 | 0.0475 | 0.0007 | 298  | 85  | 299  | 13  | 299  | 4  | 100.0 | 299        | 4  |
| NJ06-51 | 0.46 | 0.0524 | 0.0039 | 0.3383 | 0.0251 | 0.0469 | 0.0007 | 301  | 141 | 296  | 19  | 295  | 5  | 100.3 | 295        | 5  |
| NJ06-52 | 0.68 | 0.0526 | 0.0064 | 0.3455 | 0.0418 | 0.0477 | 0.0009 | 310  | 241 | 301  | 32  | 300  | 5  | 100.3 | 300        | 5  |
| NJ06-53 | 0.39 | 0.0522 | 0.0025 | 0.3406 | 0.0165 | 0.0473 | 0.0007 | 296  | 84  | 298  | 12  | 298  | 4  | 100.0 | 298        | 4  |
| NJ06-54 | 0.44 | 0.0524 | 0.0034 | 0.3554 | 0.0232 | 0.0492 | 0.0008 | 304  | 121 | 309  | 17  | 309  | 5  | 100.0 | 309        | 5  |
| NJ06-55 | 0.44 | 0.0522 | 0.0157 | 0.3465 | 0.1040 | 0.0481 | 0.0011 | 296  | 504 | 302  | 78  | 303  | 7  | 99.7  | 303        | 7  |
| NJ06-56 | 0.51 | 0.0534 | 0.0076 | 0.3706 | 0.0520 | 0.0503 | 0.0012 | 347  | 275 | 320  | 39  | 316  | 7  | 101.3 | 316        | 7  |
| NJ06-57 | 0.54 | 0.0519 | 0.0099 | 0.3161 | 0.0604 | 0.0442 | 0.0009 | 280  | 354 | 279  | 47  | 279  | 5  | 100.0 | 279        | 5  |
| NJ06-58 | 0.67 | 0.0519 | 0.0060 | 0.3296 | 0.0380 | 0.0461 | 0.0008 | 281  | 230 | 289  | 29  | 290  | 5  | 99.7  | 290        | 5  |
| NJ06-59 | 0.50 | 0.0521 | 0.0054 | 0.3337 | 0.0347 | 0.0465 | 0.0008 | 288  | 203 | 292  | 26  | 293  | 5  | 99.7  | 293        | 5  |
| NJ06-60 | 0.51 | 0.0536 | 0.0145 | 0.3868 | 0.1044 | 0.0523 | 0.0015 | 354  | 460 | 332  | 76  | 329  | 9  | 100.9 | 329        | 9  |
| NJ06-61 | 0.89 | 0.0524 | 0.0027 | 0.3411 | 0.0178 | 0.0473 | 0.0007 | 301  | 92  | 298  | 13  | 298  | 4  | 100.0 | 298        | 4  |
| NJ06-62 | 0.52 | 0.0522 | 0.0091 | 0.3527 | 0.0610 | 0.0490 | 0.0010 | 296  | 323 | 307  | 46  | 308  | 6  | 99.7  | 308        | 6  |
| NJ06-63 | 0.77 | 0.0540 | 0.0043 | 0.4409 | 0.0353 | 0.0592 | 0.0010 | 371  | 151 | 371  | 25  | 371  | 6  | 100.0 | 371        | 6  |
| NJ06-64 | 0.46 | 0.0525 | 0.0228 | 0.3443 | 0.1495 | 0.0476 | 0.0015 | 307  | 730 | 300  | 113 | 299  | 9  | 100.3 | 299        | 9  |
| NJ06-65 | 0.72 | 0.0523 | 0.0099 | 0.3338 | 0.0633 | 0.0463 | 0.0009 | 297  | 349 | 292  | 48  | 292  | 6  | 100.0 | 292        | 6  |
| NJ06-66 | 0.58 | 0.0517 | 0.0067 | 0.3105 | 0.0401 | 0.0436 | 0.0008 | 273  | 253 | 275  | 31  | 275  | 5  | 100.0 | 275        | 5  |
| NJ06-67 | 0.72 | 0.0528 | 0.0041 | 0.3719 | 0.0289 | 0.0511 | 0.0009 | 320  | 146 | 321  | 21  | 321  | 5  | 100.0 | 321        | 5  |
| NJ06-68 | 0.60 | 0.0524 | 0.0048 | 0.3382 | 0.0312 | 0.0468 | 0.0008 | 303  | 178 | 296  | 24  | 295  | 5  | 100.3 | 295        | 5  |
| NJ06-69 | 0.63 | 0.0523 | 0.0064 | 0.3326 | 0.0404 | 0.0461 | 0.0008 | 299  | 242 | 292  | 31  | 291  | 5  | 100.3 | 291        | 5  |
| NJ06-70 | 0.82 | 0.0523 | 0.0031 | 0.3412 | 0.0206 | 0.0473 | 0.0007 | 300  | 110 | 298  | 16  | 298  | 4  | 100.0 | 298        | 4  |
| NJ06-71 | 0.11 | 0.0582 | 0.0060 | 0.6597 | 0.0674 | 0.0822 | 0.0017 | 538  | 191 | 514  | 41  | 509  | 10 | 101.0 | 509        | 10 |
| NJ06-72 | 0.60 | 0.0523 | 0.0050 | 0.3347 | 0.0319 | 0.0464 | 0.0008 | 297  | 185 | 293  | 24  | 293  | 5  | 100.0 | 293        | 5  |
| NJ06-73 | 0.50 | 0.0521 | 0.0047 | 0.3388 | 0.0305 | 0.0472 | 0.0008 | 289  | 175 | 296  | 23  | 297  | 5  | 99.7  | 297        | 5  |
| NJ06-74 | 0.98 | 0.0519 | 0.0032 | 0.3101 | 0.0191 | 0.0434 | 0.0007 | 279  | 114 | 274  | 15  | 274  | 4  | 100.0 | 274        | 4  |
| NJ06-75 | 0.47 | 0.0523 | 0.0061 | 0.3589 | 0.0421 | 0.0497 | 0.0009 | 300  | 233 | 311  | 31  | 313  | 5  | 99.4  | 313        | 5  |
| NJ06-76 | 0.49 | 0.0524 | 0.0064 | 0.3359 | 0.0412 | 0.0464 | 0.0008 | 305  | 246 | 294  | 31  | 293  | 5  | 100.3 | 293        | 5  |
| NJ06-77 | 0.47 | 0.0529 | 0.0035 | 0.3686 | 0.0243 | 0.0506 | 0.0008 | 322  | 121 | 319  | 18  | 318  | 5  | 100.3 | 318        | 5  |
| NJ06-78 | 0.55 | 0.0526 | 0.0092 | 0.3442 | 0.0605 | 0.0475 | 0.0009 | 309  | 327 | 300  | 46  | 299  | 6  | 100.3 | 299        | 6  |
| NJ06-79 | 0.54 | 0.0520 | 0.0106 | 0.3301 | 0.0671 | 0.0461 | 0.0010 | 283  | 361 | 290  | 51  | 290  | 6  | 100.0 | 290        | 6  |

|          |      |        |        |        |        |        |        |     |     |     |    |     |   |       |     |   |
|----------|------|--------|--------|--------|--------|--------|--------|-----|-----|-----|----|-----|---|-------|-----|---|
| NJ06-93  | 0.51 | 0.0525 | 0.0050 | 0.3474 | 0.0330 | 0.0479 | 0.0008 | 309 | 185 | 303 | 25 | 302 | 5 | 100.3 | 302 | 5 |
| NJ06-94  | 0.53 | 0.0522 | 0.0089 | 0.3410 | 0.0580 | 0.0474 | 0.0010 | 293 | 319 | 298 | 44 | 298 | 6 | 100.0 | 298 | 6 |
| NJ06-95  | 0.50 | 0.0522 | 0.0101 | 0.3346 | 0.0646 | 0.0465 | 0.0010 | 294 | 355 | 293 | 49 | 293 | 6 | 100.0 | 293 | 6 |
| NJ06-96  | 0.49 | 0.0522 | 0.0065 | 0.3367 | 0.0418 | 0.0467 | 0.0008 | 295 | 248 | 295 | 32 | 294 | 5 | 100.3 | 294 | 5 |
| NJ06-97  | 0.78 | 0.0525 | 0.0072 | 0.3452 | 0.0473 | 0.0477 | 0.0009 | 308 | 272 | 301 | 36 | 300 | 6 | 100.3 | 300 | 6 |
| NJ06-98  | 0.71 | 0.0523 | 0.0135 | 0.3360 | 0.0865 | 0.0466 | 0.0011 | 297 | 436 | 294 | 66 | 294 | 7 | 100.0 | 294 | 7 |
| NJ06-99  | 0.46 | 0.0526 | 0.0102 | 0.3625 | 0.0703 | 0.0500 | 0.0011 | 311 | 357 | 314 | 52 | 314 | 7 | 100.0 | 314 | 7 |
| NJ06-100 | 0.62 | 0.0526 | 0.0104 | 0.3509 | 0.0692 | 0.0483 | 0.0010 | 312 | 363 | 305 | 52 | 304 | 6 | 100.3 | 304 | 6 |

Sample XT12-09, sandstone, Early Permian Xiaotikanlike Formation in Heiyingshan section of STB, (Liu et al., 2013, Tectonophysics)

|         |      |        |        |        |          |        |        |      |     |      |    |      |    |       |      |    |
|---------|------|--------|--------|--------|----------|--------|--------|------|-----|------|----|------|----|-------|------|----|
| XJ09-01 | 0.57 | 0.0518 | 0.0017 | 0.3216 | 0.0106   | 0.0450 | 0.0007 | 276  | 46  | 283  | 8  | 284  | 4  | 99.6  | 284  | 4  |
| XJ09-02 | 0.51 | 0.0517 | 0.0013 | 0.3188 | 0.0084   | 0.0447 | 0.0007 | 271  | 34  | 281  | 6  | 282  | 4  | 99.6  | 282  | 4  |
| XJ09-03 | 0.54 | 0.0523 | 0.0012 | 0.3382 | 0.0082   | 0.0469 | 0.0007 | 297  | 29  | 296  | 6  | 296  | 4  | 100.0 | 296  | 4  |
| XJ09-04 | 0.40 | 0.0510 | 0.0011 | 0.3293 | 0.0072   | 0.0468 | 0.0007 | 240  | 25  | 289  | 5  | 295  | 4  | 98.0  | 295  | 4  |
| XJ09-05 | 0.51 | 0.0523 | 0.0016 | 0.3302 | 0.0100   | 0.0458 | 0.0007 | 296  | 41  | 290  | 8  | 289  | 4  | 100.3 | 289  | 4  |
| XJ09-06 | 0.59 | 0.0518 | 0.0022 | 0.3221 | 0.0133   | 0.0451 | 0.0008 | 277  | 63  | 284  | 10 | 284  | 5  | 100.0 | 284  | 5  |
| XJ09-07 | 0.56 | 0.0522 | 0.0037 | 0.3339 | 0.0234   | 0.0464 | 0.0009 | 293  | 126 | 293  | 18 | 292  | 5  | 100.3 | 292  | 5  |
| XJ09-08 | 0.61 | 0.0520 | 0.0031 | 0.3344 | 0.0200   | 0.0466 | 0.0008 | 286  | 104 | 293  | 15 | 294  | 5  | 99.7  | 294  | 5  |
| XJ09-09 | 0.46 | 0.0522 | 0.0021 | 0.3509 | 0.0142   | 0.0488 | 0.0008 | 293  | 61  | 305  | 11 | 307  | 5  | 99.3  | 307  | 5  |
| XJ09-10 | 0.61 | 0.0522 | 0.0031 | 0.3242 | 0.0188   | 0.0451 | 0.0008 | 292  | 99  | 285  | 14 | 284  | 5  | 100.4 | 284  | 5  |
| XJ09-11 | 0.47 | 0.0523 | 0.0036 | 0.3398 | 0.0234   | 0.0472 | 0.0009 | 296  | 121 | 297  | 18 | 297  | 6  | 100.0 | 297  | 6  |
| XJ09-12 | 0.70 | 0.0514 | 0.0013 | 0.3109 | 0.0080   | 0.0438 | 0.0007 | 260  | 32  | 275  | 6  | 277  | 4  | 99.3  | 277  | 4  |
| XJ09-13 | 0.57 | 0.0524 | 0.0031 | 0.3294 | 0.0194   | 0.0456 | 0.0008 | 302  | 100 | 289  | 15 | 288  | 5  | 100.3 | 288  | 5  |
| XJ09-14 | 0.74 | 0.0522 | 0.0022 | 0.3337 | 0.0142   | 0.0464 | 0.0008 | 294  | 66  | 292  | 11 | 292  | 5  | 100.0 | 292  | 5  |
| XJ09-15 | 1.00 | 0.0520 | 0.0026 | 0.3281 | 0.0163   | 0.0458 | 0.0008 | 284  | 82  | 288  | 12 | 288  | 5  | 100.0 | 288  | 5  |
| XJ09-16 | 0.50 | 0.0521 | 0.0032 | 0.3242 | 0.0198   | 0.0451 | 0.0009 | 289  | 103 | 285  | 15 | 285  | 6  | 100.0 | 285  | 6  |
| XJ09-17 | 0.98 | 0.0521 | 0.0024 | 0.3261 | 0.0149   | 0.0454 | 0.0008 | 292  | 72  | 287  | 11 | 286  | 5  | 100.3 | 286  | 5  |
| XJ09-18 | 0.57 | 0.0522 | 0.0081 | 0.3441 | 0.0528   | 0.0478 | 0.0012 | 295  | 293 | 300  | 40 | 301  | 8  | 99.7  | 301  | 8  |
| XJ09-19 | 0.53 | 0.0520 | 0.0018 | 0.3318 | 0.0118   | 0.0463 | 0.0007 | 284  | 52  | 291  | 9  | 292  | 4  | 99.7  | 292  | 4  |
| XJ09-20 | 0.41 | 0.0521 | 0.0021 | 0.3262 | 0.0131   | 0.0454 | 0.0008 | 288  | 61  | 287  | 10 | 286  | 5  | 100.3 | 286  | 5  |
| XJ09-21 | 0.51 | 0.0517 | 0.0092 | 0.3247 | 0.0570   | 0.0456 | 0.0014 | 270  | 312 | 286  | 44 | 287  | 9  | 99.7  | 287  | 9  |
| XJ09-22 | 0.46 | 0.0523 | 0.0033 | 0.3469 | 0.0217   | 0.0481 | 0.0009 | 298  | 109 | 302  | 16 | 303  | 6  | 99.7  | 303  | 6  |
| XJ09-23 | 0.31 | 0.0519 | 0.0030 | 0.3419 | 0.0192   | 0.0478 | 0.0009 | 281  | 94  | 299  | 15 | 301  | 5  | 99.3  | 301  | 5  |
| XJ09-24 | 0.38 | 0.0606 | 0.0016 | 0.8684 | 0.0237   | 0.1039 | 0.0016 | 626  | 33  | 635  | 13 | 637  | 9  | 99.7  | 637  | 9  |
| XJ09-25 | 0.53 | 0.0524 | 0.0027 | 0.3251 | 0.0163   | 0.0450 | 0.0008 | 301  | 81  | 286  | 12 | 284  | 5  | 100.7 | 284  | 5  |
| XJ09-26 | 0.48 | 0.0517 | 0.0034 | 0.3365 | 0.0219   | 0.0472 | 0.0009 | 272  | 113 | 295  | 17 | 297  | 6  | 99.3  | 297  | 6  |
| XJ09-27 | 0.49 | 0.0517 | 0.0021 | 0.3167 | 0.0128   | 0.0445 | 0.0008 | 270  | 61  | 279  | 10 | 280  | 5  | 99.6  | 280  | 5  |
| XJ09-28 | 0.44 | 0.0519 | 0.0059 | 0.3368 | 0.0377   | 0.0471 | 0.0012 | 281  | 205 | 295  | 29 | 296  | 7  | 99.7  | 296  | 7  |
| XJ09-29 | 0.63 | 0.0521 | 0.0032 | 0.3265 | 0.0201   | 0.0455 | 0.0008 | 289  | 109 | 287  | 15 | 287  | 5  | 100.0 | 287  | 5  |
| XJ09-30 | 0.48 | 0.0523 | 0.0025 | 0.3385 | 0.0163   | 0.0469 | 0.0008 | 299  | 78  | 296  | 12 | 296  | 5  | 100.0 | 296  | 5  |
| XJ09-31 | 0.72 | 0.0519 | 0.0021 | 0.3251 | 0.0128   | 0.0454 | 0.0008 | 282  | 59  | 286  | 10 | 286  | 5  | 100.0 | 286  | 5  |
| XJ09-32 | 0.60 | 0.0520 | 0.0024 | 0.3166 | 0.0143   | 0.0442 | 0.0008 | 284  | 71  | 279  | 11 | 279  | 5  | 100.0 | 279  | 5  |
| XJ09-33 | 0.54 | 0.0516 | 0.0025 | 0.3267 | 0.0155   | 0.0459 | 0.0008 | 269  | 78  | 287  | 12 | 289  | 5  | 99.3  | 289  | 5  |
| XJ09-34 | 0.48 | 0.0547 | 0.0011 | 0.5004 | 0.0108   | 0.0664 | 0.0010 | 399  | 24  | 412  | 7  | 414  | 6  | 99.5  | 414  | 6  |
| XJ09-35 | 0.75 | 0.0524 | 0.0036 | 0.3308 | 0.0225   | 0.0458 | 0.0010 | 302  | 117 | 290  | 17 | 289  | 6  | 100.3 | 289  | 6  |
| XJ09-36 | 0.60 | 0.0526 | 0.0029 | 0.3262 | 0.0178   | 0.0450 | 0.0008 | 310  | 92  | 287  | 14 | 284  | 5  | 101.1 | 284  | 5  |
| XJ09-37 | 0.79 | 0.0522 | 0.0017 | 0.3315 | 0.0109   | 0.0460 | 0.0007 | 296  | 46  | 291  | 8  | 290  | 4  | 100.3 | 290  | 4  |
| XJ09-38 | 0.62 | 0.0523 | 0.0039 | 0.3212 | 0.0236   | 0.0445 | 0.0009 | 300  | 129 | 283  | 18 | 281  | 6  | 100.7 | 281  | 6  |
| XJ09-39 | 0.56 | 0.0518 | 0.0026 | 0.3254 | 0.0164   | 0.0455 | 0.0008 | 277  | 83  | 286  | 13 | 287  | 5  | 99.7  | 287  | 5  |
| XJ09-40 | 0.60 | 0.0519 | 0.0027 | 0.3343 | 0.0173   | 0.0467 | 0.0008 | 282  | 85  | 293  | 13 | 294  | 5  | 99.7  | 294  | 5  |
| XJ09-41 | 0.46 | 0.0519 | 0.0017 | 0.3295 | 0.0107   | 0.0461 | 0.0007 | 280  | 45  | 289  | 8  | 290  | 4  | 99.7  | 290  | 4  |
| XJ09-42 | 0.63 | 0.0521 | 0.0024 | 0.3408 | 0.0153   | 0.0474 | 0.0008 | 292  | 71  | 298  | 12 | 298  | 5  | 100.0 | 298  | 5  |
| XJ09-43 | 0.38 | 0.0523 | 0.0017 | 0.3239 | 0.0104   | 0.0449 | 0.0007 | 298  | 45  | 285  | 8  | 283  | 4  | 100.7 | 283  | 4  |
| XJ09-44 | 0.66 | 0.0520 | 0.0025 | 0.3392 | 0.0161   | 0.0473 | 0.0008 | 285  | 77  | 297  | 12 | 298  | 5  | 99.7  | 298  | 5  |
| XJ09-45 | 7.14 | 0.0512 | 0.0077 | 0.2824 | 0.0418   | 0.0400 | 0.0013 | 248  | 271 | 253  | 33 | 253  | 8  | 100.0 | 253  | 8  |
| XJ09-46 | 0.47 | 0.0517 | 0.0029 | 0.3281 | 0.0180   | 0.0460 | 0.0009 | 272  | 91  | 288  | 14 | 290  | 5  | 99.3  | 290  | 5  |
| XJ09-47 | 0.49 | 0.0526 | 0.0044 | 0.3378 | 0.0278   | 0.0466 | 0.0009 | 312  | 150 | 295  | 21 | 293  | 6  | 100.7 | 293  | 6  |
| XJ09-48 | 0.63 | 0.0601 | 0.0017 | 0.8674 | 0.0248   | 0.1047 | 0.0016 | 607  | 35  | 634  | 13 | 642  | 10 | 98.8  | 642  | 10 |
| XJ09-49 | 1.03 | 0.0520 | 0.0024 | 0.3346 | 0.0151   | 0.0466 | 0.0008 | 286  | 72  | 293  | 12 | 294  | 5  | 99.7  | 294  | 5  |
| XJ09-50 | 0.50 | 0.0524 | 0.0033 | 0.3240 | 0.0200   | 0.0448 | 0.0008 | 304  | 108 | 285  | 15 | 283  | 5  | 100.7 | 283  | 5  |
| XJ09-51 | 0.48 | 0.0519 | 0.0016 | 0.3290 | 0.0102   | 0.0459 | 0.0007 | 282  | 42  | 289  | 8  | 290  | 4  | 99.7  | 290  | 4  |
| XJ09-52 | 0.44 | 0.0518 | 0.0021 | 0.3293 | 0.0135   | 0.0461 | 0.0008 | 276  | 64  | 289  | 10 | 291  | 5  | 99.3  | 291  | 5  |
| XJ09-53 | 0.88 | 0.0864 | 0.0018 | 2.789  | 0.0618   | 0.2340 | 0.0035 | 1348 | 21  | 1353 | 17 | 1355 | 18 | 99.5  | 1348 | 21 |
| XJ09-54 | 0.53 | 0.0520 | 0.0040 | 0.3483 | 0.0263   | 0.0486 | 0.0010 | 286  | 135 | 303  | 20 | 306  | 6  | 99.0  | 306  | 6  |
| XJ09-55 | 0.64 | 0.0548 | 0.0018 | 0.5061 | 0.0165   | 0.0669 | 0.0011 | 406  | 44  | 416  | 11 | 418  | 7  | 99.5  | 418  | 7  |
| XJ09-56 | 0.65 | 0.0517 | 0.0021 | 0.3261 | 0.0131   | 0.0457 | 0.0008 | 272  | 60  | 287  | 10 | 288  | 5  | 99.7  | 288  | 5  |
| XJ09-57 | 0.56 | 0.0518 | 0.0021 | 0.3293 | 0.0135   | 0.0461 | 0.0008 | 277  | 63  | 289  | 10 | 290  | 5  | 99.7  | 290  | 5  |
| XJ09-58 | 0.44 | 0.0515 | 0.0012 | 0.3191 | 0.0075   | 0.0449 | 0.0007 | 263  | 28  | 281  | 6  | 283  | 4  | 99.3  | 283  | 4  |
| XJ09-59 | 0.62 | 0.0524 | 0.0023 | 0.3336 | 0.0145   | 0.0462 | 0.0008 | 303  | 68  | 292  | 11 | 291  | 5  | 100.3 | 291  | 5  |
| XJ09-60 | 0.65 | 0.0521 | 0.0031 | 0.3217 | 0.0188   | 0.0448 | 0.0008 | 290  | 100 | 283  | 14 | 282  | 5  | 100.4 | 282  | 5  |
| XJ09-61 | 0.77 | 0.0523 | 0.0019 | 0.3336 | 0.0118   | 0.0463 | 0.0008 | 297  | 50  | 292  | 9  | 292  | 5  | 100.0 | 292  | 5  |
| XJ09-62 | 0.68 | 0.0525 | 0.0035 | 0.3235 | 0.0213   | 0.0447 | 0.0008 | 306  | 117 | 285  | 16 | 282  | 5  | 101.1 | 282  | 5  |
| XJ09-63 | 0.34 | 0.0519 | 0.0015 | 0.3237 | 0.0097   | 0.0453 | 0.0007 | 280  | 40  | 285  | 7  | 285  | 4  | 100.0 | 285  | 4  |
| XJ09-64 | 0.50 | 0.0516 | 0.0046 | 0.3179 | 0.0283   | 0.0447 | 0.0010 | 268  | 162 | 280  | 22 | 282  | 6  | 99.3  | 282  | 6  |
| XJ09-65 | 0.37 | 0.0600 | 0.0016 | 0.8590 | 0.0227   | 0.1038 | 0.0016 | 604  | 32  | 630  | 12 | 637  | 9  | 98.9  | 637  | 9  |
| XJ09-66 | 0.57 | 0.0525 | 0.0038 | 0.3219 | 0.0230   | 0.0445 | 0.0009 | 305  | 126 | 283  | 18 | 281  | 5  | 100.7 | 281  | 5  |
| XJ09-67 | 0.79 | 0.0518 | 0.0034 | 0.3150 | 0.0201   | 0.0441 | 0.0009 | 278  | 110 | 278  | 16 | 278  | 5  | 100.0 | 278  | 5  |
| XJ09-68 | 1.85 | 0.0604 | 0.0022 | 0.8494 | 0.0307   | 0.1020 | 0.0017 | 617  | 50  | 624  | 17 | 626  | 10 | 99.7  | 626  | 10 |
| XJ09-69 | 0.75 | 0.0516 | 0.0057 | 0.3228 | 0.0351   | 0.0454 | 0.0011 | 267  | 201 | 284  | 27 | 286  | 7  | 99.3  | 286  | 7  |
| XJ09-70 | 1.59 | 0.1224 | 0.0026 | 6.081  | 0.1343   | 0.3604 | 0.0055 | 1991 | 20  | 1988 | 19 | 1984 | 26 | 100.4 | 1991 | 20 |
| XJ09-71 | 0.88 | 0.0523 | 0.0026 | 0.3237 | 0.0158   | 0.0449 | 0.0008 | 299  | 80  | 285  | 12 | 283  | 5  | 100.7 | 283  | 5  |
| XJ09-72 | 0.63 | 0.0521 | 0.0026 | 0.3241 | 0.0157   | 0.0451 | 0.0008 | 289  | 77  | 285  | 12 | 285  | 5  | 100.0 | 285  | 5  |
| XJ09-73 | 1.12 | 0.0546 | 0.0014 | 0.5011 | 0.0130   | 0.0666 | 0.0010 | 394  | 32  | 412  | 9  | 416  | 6  | 99.0  | 416  | 6  |
| XJ09-74 | 0.56 | 0.0513 | 0.0038 | 0.2846 | 0.0210</ |        |        |      |     |      |    |      |    |       |      |    |

|          |     |      |      |        |        |        |        |        |        |      |     |      |    |      |    |       |            |    |
|----------|-----|------|------|--------|--------|--------|--------|--------|--------|------|-----|------|----|------|----|-------|------------|----|
| MT62A-08 | 153 | 297  | 0.52 | 0.0574 | 0.0017 | 0.5770 | 0.0200 | 0.0729 | 0.0009 | 508  | 62  | 462  | 13 | 453  | 5  | 102.0 | 453        | 5  |
| MT62A-09 | 235 | 479  | 0.49 | 0.0967 | 0.0014 | 3.553  | 0.0480 | 0.2665 | 0.0026 | 1561 | 25  | 1539 | 11 | 1523 | 13 | 102.5 | 1561       | 25 |
| MT62A-10 | 286 | 595  | 0.48 | 0.0572 | 0.0010 | 0.5710 | 0.0100 | 0.0725 | 0.0007 | 497  | 37  | 459  | 6  | 451  | 4  | 101.8 | 451        | 4  |
| MT62A-11 | 180 | 368  | 0.49 | 0.0567 | 0.0014 | 0.5550 | 0.0160 | 0.0710 | 0.0008 | 478  | 52  | 448  | 10 | 442  | 5  | 101.4 | 442        | 5  |
| MT62A-12 | 65  | 108  | 0.60 | 0.0773 | 0.0015 | 2.049  | 0.0390 | 0.1923 | 0.0021 | 1128 | 38  | 1132 | 13 | 1134 | 11 | 99.5  | 1128       | 38 |
| MT62A-13 | 277 | 256  | 1.08 | 0.0565 | 0.0014 | 0.5620 | 0.0140 | 0.0721 | 0.0008 | 472  | 53  | 453  | 9  | 449  | 5  | 100.9 | 449        | 5  |
| MT62A-14 | 182 | 338  | 0.54 | 0.0596 | 0.0018 | 0.6330 | 0.0220 | 0.0771 | 0.0009 | 588  | 64  | 498  | 14 | 479  | 6  | 104.0 | 479        | 6  |
| MT62A-15 | 157 | 365  | 0.43 | 0.0675 | 0.0011 | 1.259  | 0.0200 | 0.1353 | 0.0014 | 852  | 33  | 827  | 9  | 818  | 8  | 101.1 | 818        | 8  |
| MT62A-16 | 131 | 170  | 0.77 | 0.0563 | 0.0015 | 0.5430 | 0.0140 | 0.0700 | 0.0008 | 463  | 57  | 440  | 9  | 436  | 5  | 100.9 | 436        | 5  |
| MT62A-17 | 96  | 205  | 0.47 | 0.0554 | 0.0014 | 0.5260 | 0.0130 | 0.0690 | 0.0008 | 426  | 54  | 429  | 9  | 430  | 5  | 99.8  | 430        | 5  |
| MT62A-18 | 24  | 63   | 0.38 | 0.0542 | 0.0037 | 0.4800 | 0.0340 | 0.0642 | 0.0011 | 379  | 148 | 398  | 23 | 401  | 7  | 99.3  | 401        | 7  |
| MT62A-19 | 135 | 247  | 0.55 | 0.0583 | 0.0018 | 0.5450 | 0.0160 | 0.0678 | 0.0008 | 539  | 63  | 442  | 10 | 423  | 5  | 104.5 | 423        | 5  |
| MT62A-20 | 184 | 218  | 0.84 | 0.0582 | 0.0018 | 0.5270 | 0.0160 | 0.0656 | 0.0008 | 538  | 64  | 430  | 10 | 410  | 5  | 104.9 | 410        | 5  |
| MT62A-21 | 88  | 335  | 0.26 | 0.0868 | 0.0013 | 2.505  | 0.0430 | 0.2093 | 0.0022 | 1357 | 27  | 1274 | 13 | 1225 | 12 | 110.8 | Discordant |    |
| MT62A-22 | 120 | 255  | 0.47 | 0.0566 | 0.0018 | 0.4990 | 0.0190 | 0.0640 | 0.0008 | 474  | 69  | 411  | 13 | 400  | 5  | 102.8 | 400        | 5  |
| MT62A-23 | 140 | 208  | 0.67 | 0.0548 | 0.0014 | 0.5190 | 0.0130 | 0.0687 | 0.0008 | 404  | 55  | 425  | 9  | 429  | 5  | 99.1  | 429        | 5  |
| MT62A-24 | 183 | 301  | 0.61 | 0.0548 | 0.0012 | 0.5020 | 0.0110 | 0.0664 | 0.0007 | 404  | 49  | 413  | 7  | 414  | 4  | 99.8  | 414        | 4  |
| MT62A-25 | 72  | 110  | 0.65 | 0.0541 | 0.0019 | 0.5610 | 0.0200 | 0.0753 | 0.0009 | 375  | 77  | 452  | 13 | 468  | 5  | 96.6  | 468        | 5  |
| MT62A-26 | 22  | 63   | 0.34 | 0.0566 | 0.0025 | 0.6130 | 0.0270 | 0.0785 | 0.0011 | 476  | 95  | 485  | 17 | 487  | 6  | 99.6  | 487        | 6  |
| MT62A-27 | 67  | 321  | 0.21 | 0.1732 | 0.0024 | 11.150 | 0.1510 | 0.4670 | 0.0047 | 2588 | 22  | 2536 | 13 | 2470 | 20 | 104.8 | 2588       | 22 |
| MT62A-28 | 93  | 183  | 0.51 | 0.1221 | 0.0018 | 5.940  | 0.0860 | 0.3528 | 0.0036 | 1987 | 26  | 1967 | 13 | 1948 | 17 | 102.0 | 1987       | 26 |
| MT62A-29 | 156 | 255  | 0.61 | 0.1166 | 0.0017 | 5.595  | 0.0800 | 0.3478 | 0.0035 | 1905 | 25  | 1915 | 12 | 1924 | 17 | 99.0  | 1905       | 25 |
| MT62A-30 | 95  | 107  | 0.89 | 0.0698 | 0.0021 | 1.252  | 0.0370 | 0.1300 | 0.0016 | 923  | 60  | 824  | 17 | 788  | 9  | 104.6 | 788        | 9  |
| MT62A-31 | 107 | 134  | 0.79 | 0.0622 | 0.0019 | 0.6670 | 0.0200 | 0.0778 | 0.0009 | 680  | 63  | 519  | 12 | 483  | 6  | 107.5 | 483        | 6  |
| MT62A-32 | 229 | 496  | 0.48 | 0.0558 | 0.0011 | 0.5230 | 0.0100 | 0.0679 | 0.0007 | 445  | 41  | 427  | 7  | 424  | 4  | 100.7 | 424        | 4  |
| MT62A-33 | 59  | 51   | 1.18 | 0.0670 | 0.0023 | 1.228  | 0.0400 | 0.1330 | 0.0017 | 837  | 67  | 813  | 18 | 805  | 10 | 101.0 | 805        | 10 |
| MT62A-34 | 2   | 390  | 0.01 | 0.0563 | 0.0011 | 0.6330 | 0.0120 | 0.0814 | 0.0009 | 465  | 42  | 498  | 8  | 505  | 5  | 98.6  | 505        | 5  |
| MT62A-35 | 27  | 89   | 0.30 | 0.1023 | 0.0024 | 3.983  | 0.0890 | 0.2823 | 0.0034 | 1666 | 41  | 1631 | 18 | 1603 | 17 | 103.9 | 1666       | 41 |
| MT62A-36 | 214 | 355  | 0.60 | 0.0568 | 0.0012 | 0.5520 | 0.0110 | 0.0705 | 0.0007 | 485  | 44  | 447  | 7  | 439  | 4  | 101.8 | 439        | 4  |
| MT62A-37 | 52  | 108  | 0.48 | 0.0558 | 0.0020 | 0.5090 | 0.0180 | 0.0661 | 0.0008 | 444  | 75  | 418  | 12 | 413  | 5  | 101.2 | 413        | 5  |
| MT62A-38 | 106 | 332  | 0.32 | 0.2025 | 0.0029 | 15.485 | 0.2140 | 0.5545 | 0.0056 | 2846 | 22  | 2846 | 13 | 2844 | 23 | 100.1 | 2846       | 22 |
| MT62A-39 | 59  | 132  | 0.45 | 0.1218 | 0.0020 | 6.188  | 0.0960 | 0.3684 | 0.0038 | 1983 | 27  | 2003 | 14 | 2022 | 18 | 98.1  | 1983       | 27 |
| MT62A-40 | 187 | 340  | 0.55 | 0.0559 | 0.0012 | 0.5730 | 0.0120 | 0.0743 | 0.0008 | 450  | 46  | 460  | 8  | 462  | 5  | 99.6  | 462        | 5  |
| MT62A-41 | 300 | 623  | 0.48 | 0.0715 | 0.0012 | 1.561  | 0.0240 | 0.1584 | 0.0016 | 971  | 31  | 955  | 10 | 948  | 9  | 100.7 | 948        | 9  |
| MT62A-42 | 257 | 587  | 0.44 | 0.0571 | 0.0011 | 0.5680 | 0.0110 | 0.0722 | 0.0008 | 496  | 42  | 457  | 7  | 449  | 5  | 101.8 | 449        | 5  |
| MT62A-43 | 324 | 583  | 0.55 | 0.0808 | 0.0012 | 2.354  | 0.0350 | 0.2112 | 0.0021 | 1217 | 29  | 1229 | 11 | 1235 | 11 | 98.5  | 1217       | 29 |
| MT62A-44 | 211 | 498  | 0.42 | 0.0547 | 0.0011 | 0.5150 | 0.0100 | 0.0683 | 0.0007 | 400  | 42  | 422  | 7  | 426  | 4  | 99.1  | 426        | 4  |
| MT62A-45 | 121 | 186  | 0.65 | 0.1783 | 0.0027 | 12.322 | 0.1820 | 0.5011 | 0.0052 | 2637 | 24  | 2629 | 14 | 2619 | 22 | 100.7 | 2637       | 24 |
| MT62A-46 | 306 | 583  | 0.53 | 0.0559 | 0.0013 | 0.5270 | 0.0160 | 0.0684 | 0.0008 | 449  | 51  | 430  | 10 | 426  | 5  | 100.9 | 426        | 5  |
| MT62A-47 | 58  | 134  | 0.43 | 0.1249 | 0.0021 | 6.370  | 0.1040 | 0.3700 | 0.0039 | 2027 | 29  | 2028 | 14 | 2029 | 19 | 99.9  | 2027       | 29 |
| MT62A-48 | 202 | 446  | 0.45 | 0.0558 | 0.0011 | 0.5710 | 0.0110 | 0.0742 | 0.0008 | 444  | 43  | 459  | 7  | 461  | 5  | 99.6  | 461        | 5  |
| MT62A-49 | 78  | 217  | 0.36 | 0.0569 | 0.0017 | 0.5500 | 0.0160 | 0.0702 | 0.0008 | 487  | 64  | 445  | 11 | 437  | 5  | 101.8 | 437        | 5  |
| MT62A-50 | 121 | 150  | 0.81 | 0.0551 | 0.0017 | 0.5100 | 0.0150 | 0.0671 | 0.0008 | 416  | 65  | 418  | 10 | 418  | 5  | 100.0 | 418        | 5  |
| MT62A-51 | 76  | 473  | 0.16 | 0.0626 | 0.0011 | 0.9370 | 0.0160 | 0.1085 | 0.0011 | 694  | 36  | 671  | 8  | 664  | 7  | 101.1 | 664        | 7  |
| MT62A-52 | 47  | 76   | 0.61 | 0.1081 | 0.0020 | 4.849  | 0.0890 | 0.3253 | 0.0036 | 1767 | 33  | 1793 | 15 | 1816 | 17 | 97.3  | 1767       | 33 |
| MT62A-53 | 531 | 378  | 1.40 | 0.1183 | 0.0019 | 5.622  | 0.0880 | 0.3446 | 0.0036 | 1931 | 28  | 1920 | 14 | 1909 | 17 | 101.2 | 1931       | 28 |
| MT62A-54 | 160 | 217  | 0.74 | 0.0569 | 0.0020 | 0.5180 | 0.0220 | 0.0659 | 0.0009 | 489  | 74  | 424  | 15 | 412  | 5  | 102.9 | 412        | 5  |
| MT62A-55 | 253 | 425  | 0.60 | 0.0571 | 0.0012 | 0.5510 | 0.0110 | 0.0700 | 0.0007 | 494  | 44  | 446  | 7  | 436  | 4  | 102.3 | 436        | 4  |
| MT62A-56 | 14  | 59   | 0.23 | 0.0756 | 0.0020 | 1.986  | 0.0510 | 0.1906 | 0.0023 | 1084 | 50  | 1111 | 17 | 1124 | 12 | 96.4  | 1084       | 50 |
| MT62A-57 | 266 | 465  | 0.57 | 0.0572 | 0.0012 | 0.5500 | 0.0110 | 0.0697 | 0.0007 | 499  | 44  | 445  | 7  | 435  | 4  | 102.3 | 435        | 4  |
| MT62A-58 | 313 | 365  | 0.86 | 0.0771 | 0.0014 | 2.047  | 0.0360 | 0.1926 | 0.0020 | 1123 | 35  | 1131 | 12 | 1135 | 11 | 98.9  | 1123       | 35 |
| MT62A-59 | 72  | 222  | 0.32 | 0.0531 | 0.0021 | 0.4140 | 0.0160 | 0.0565 | 0.0007 | 333  | 85  | 351  | 11 | 354  | 4  | 99.2  | 354        | 4  |
| MT62A-60 | 150 | 253  | 0.59 | 0.0535 | 0.0013 | 0.5170 | 0.0130 | 0.0701 | 0.0008 | 348  | 54  | 423  | 8  | 437  | 5  | 96.8  | 437        | 5  |
| MT62A-61 | 148 | 208  | 0.71 | 0.0758 | 0.0018 | 1.514  | 0.0350 | 0.1448 | 0.0017 | 1091 | 45  | 936  | 14 | 872  | 9  | 107.3 | 872        | 9  |
| MT62A-62 | 622 | 800  | 0.78 | 0.0568 | 0.0011 | 0.5890 | 0.0120 | 0.0753 | 0.0008 | 483  | 44  | 470  | 7  | 468  | 5  | 100.4 | 468        | 5  |
| MT62A-63 | 137 | 142  | 0.96 | 0.0537 | 0.0020 | 0.3940 | 0.0140 | 0.0533 | 0.0007 | 358  | 82  | 338  | 10 | 335  | 4  | 100.9 | 335        | 4  |
| MT62A-64 | 339 | 271  | 1.25 | 0.1177 | 0.0019 | 5.793  | 0.0910 | 0.3571 | 0.0037 | 1921 | 29  | 1945 | 14 | 1968 | 18 | 97.6  | 1921       | 29 |
| MT62A-65 | 158 | 418  | 0.38 | 0.1176 | 0.0019 | 6.033  | 0.0940 | 0.3721 | 0.0038 | 1920 | 28  | 1981 | 14 | 2039 | 18 | 94.2  | 1920       | 28 |
| MT62A-66 | 79  | 164  | 0.48 | 0.0750 | 0.0015 | 1.896  | 0.0360 | 0.1834 | 0.0020 | 1067 | 39  | 1080 | 13 | 1085 | 11 | 98.3  | 1067       | 39 |
| MT62A-67 | 214 | 424  | 0.50 | 0.0564 | 0.0014 | 0.5330 | 0.0130 | 0.0687 | 0.0008 | 466  | 54  | 434  | 9  | 428  | 5  | 101.4 | 428        | 5  |
| MT62A-68 | 478 | 413  | 1.16 | 0.0581 | 0.0014 | 0.5370 | 0.0130 | 0.0671 | 0.0007 | 534  | 53  | 437  | 8  | 418  | 4  | 104.5 | 418        | 4  |
| MT62A-69 | 126 | 246  | 0.51 | 0.0561 | 0.0014 | 0.6080 | 0.0140 | 0.0785 | 0.0009 | 458  | 53  | 482  | 9  | 487  | 5  | 99.0  | 487        | 5  |
| MT62A-70 | 230 | 370  | 0.62 | 0.1324 | 0.0021 | 7.365  | 0.1160 | 0.4035 | 0.0042 | 2130 | 28  | 2157 | 14 | 2185 | 19 | 97.5  | 2130       | 28 |
| MT62A-71 | 82  | 144  | 0.57 | 0.0573 | 0.0017 | 0.5730 | 0.0170 | 0.0725 | 0.0009 | 502  | 64  | 460  | 11 | 451  | 5  | 102.0 | 451        | 5  |
| MT62A-72 | 349 | 1145 | 0.30 | 0.0576 | 0.0010 | 0.5490 | 0.0100 | 0.0692 | 0.0007 | 513  | 39  | 444  | 6  | 431  | 4  | 103.0 | 431        | 4  |
| MT62A-73 | 122 | 255  | 0.48 | 0.0547 | 0.0014 | 0.5270 | 0.0130 | 0.0698 | 0.0008 | 401  | 55  | 430  | 9  | 435  | 5  | 98.9  | 435        | 5  |
| MT62A-74 | 87  | 220  | 0.39 | 0.1224 | 0.0021 | 5.728  | 0.1110 | 0.3394 | 0.0037 | 1992 | 29  | 1936 | 17 | 1884 | 18 | 105.7 | 1992       | 29 |
| MT62A-75 | 136 | 366  | 0.37 | 0.0559 | 0.0013 | 0.5230 | 0.0120 | 0.0678 | 0.0007 | 449  | 50  | 427  | 8  | 423  | 4  | 100.9 | 423        | 4  |
| MT62A-76 | 130 | 221  | 0.59 | 0.0561 | 0.0015 | 0.5460 | 0.0140 | 0.0706 | 0.0008 | 455  | 58  | 442  | 9  | 440  | 5  | 100.5 | 440        | 5  |
| MT62A-77 | 159 | 220  | 0.72 | 0.0567 | 0.0015 | 0.5480 | 0.0140 | 0.0701 | 0.0008 | 479  | 57  | 444  | 9  | 437  | 5  | 101.6 | 437        | 5  |
| MT62A-78 |     |      |      |        |        |        |        |        |        |      |     |      |    |      |    |       |            |    |

|           |     |     |      |        |        |        |        |        |        |      |     |      |    |      |    |       |            |    |
|-----------|-----|-----|------|--------|--------|--------|--------|--------|--------|------|-----|------|----|------|----|-------|------------|----|
| LT08A-042 | 100 | 129 | 0.77 | 0.0584 | 0.0022 | 0.5280 | 0.0190 | 0.0655 | 0.0010 | 545  | 80  | 430  | 13 | 409  | 6  | 105.1 | 409        | 6  |
| LT08A-043 | 136 | 352 | 0.39 | 0.0538 | 0.0016 | 0.3880 | 0.0110 | 0.0523 | 0.0007 | 362  | 65  | 333  | 8  | 329  | 4  | 101.2 | 329        | 4  |
| LT08A-044 | 50  | 94  | 0.53 | 0.0492 | 0.0025 | 0.3600 | 0.0180 | 0.0531 | 0.0009 | 157  | 114 | 312  | 14 | 333  | 5  | 93.7  | 333        | 5  |
| LT08A-045 | 105 | 272 | 0.38 | 0.0735 | 0.0017 | 1.734  | 0.0400 | 0.1710 | 0.0023 | 1028 | 45  | 1021 | 15 | 1018 | 13 | 101.0 | 1028       | 45 |
| LT08A-046 | 118 | 119 | 0.99 | 0.1449 | 0.0030 | 7.745  | 0.1670 | 0.3877 | 0.0052 | 2286 | 35  | 2202 | 19 | 2112 | 24 | 108.2 | 2286       | 35 |
| LT08A-047 | 56  | 50  | 1.12 | 0.0499 | 0.0030 | 0.4540 | 0.0260 | 0.0659 | 0.0012 | 192  | 132 | 380  | 18 | 412  | 7  | 92.2  | 412        | 7  |
| LT08A-048 | 76  | 350 | 0.22 | 0.0573 | 0.0016 | 0.5490 | 0.0150 | 0.0695 | 0.0010 | 502  | 60  | 444  | 10 | 433  | 6  | 102.5 | 433        | 6  |
| LT08A-049 | 74  | 231 | 0.32 | 0.0561 | 0.0017 | 0.5780 | 0.0170 | 0.0747 | 0.0011 | 457  | 65  | 463  | 11 | 464  | 6  | 99.8  | 464        | 6  |
| LT08A-050 | 175 | 292 | 0.60 | 0.0570 | 0.0016 | 0.5780 | 0.0160 | 0.0735 | 0.0010 | 490  | 61  | 463  | 10 | 457  | 6  | 101.3 | 457        | 6  |
| LT08A-051 | 83  | 156 | 0.54 | 0.0595 | 0.0023 | 0.6000 | 0.0280 | 0.0732 | 0.0012 | 584  | 84  | 477  | 18 | 455  | 7  | 104.8 | 455        | 7  |
| LT08A-052 | 118 | 217 | 0.54 | 0.0552 | 0.0019 | 0.5510 | 0.0190 | 0.0723 | 0.0011 | 422  | 74  | 445  | 12 | 450  | 6  | 98.9  | 450        | 6  |
| LT08A-053 | 171 | 220 | 0.78 | 0.0554 | 0.0019 | 0.5280 | 0.0180 | 0.0691 | 0.0010 | 427  | 77  | 430  | 12 | 431  | 6  | 99.8  | 431        | 6  |
| LT08A-054 | 286 | 301 | 0.95 | 0.0551 | 0.0018 | 0.5180 | 0.0170 | 0.0681 | 0.0010 | 418  | 71  | 424  | 11 | 425  | 6  | 99.8  | 425        | 6  |
| LT08A-055 | 411 | 320 | 1.29 | 0.0561 | 0.0016 | 0.5360 | 0.0160 | 0.0693 | 0.0010 | 456  | 63  | 436  | 10 | 432  | 6  | 100.9 | 432        | 6  |
| LT08A-056 | 129 | 302 | 0.43 | 0.0606 | 0.0018 | 0.5320 | 0.0150 | 0.0638 | 0.0009 | 623  | 61  | 433  | 10 | 398  | 5  | 108.8 | 398        | 5  |
| LT08A-057 | 48  | 72  | 0.66 | 0.2912 | 0.0063 | 26.969 | 0.6010 | 0.6716 | 0.0093 | 3424 | 33  | 3382 | 22 | 3312 | 36 | 103.4 | 3424       | 33 |
| LT08A-058 | 214 | 501 | 0.43 | 0.0564 | 0.0015 | 0.5490 | 0.0140 | 0.0706 | 0.0010 | 467  | 55  | 444  | 9  | 440  | 6  | 100.9 | 440        | 6  |
| LT08A-059 | 117 | 234 | 0.50 | 0.0569 | 0.0019 | 0.4920 | 0.0160 | 0.0627 | 0.0009 | 486  | 71  | 406  | 11 | 392  | 6  | 103.6 | 392        | 6  |
| LT08A-060 | 59  | 87  | 0.68 | 0.0555 | 0.0026 | 0.4560 | 0.0210 | 0.0596 | 0.0010 | 433  | 101 | 382  | 15 | 373  | 6  | 102.4 | 373        | 6  |
| LT08A-061 | 153 | 106 | 1.44 | 0.1101 | 0.0027 | 4.812  | 0.1180 | 0.3169 | 0.0044 | 1801 | 43  | 1787 | 21 | 1774 | 22 | 101.5 | 1801       | 43 |
| LT08A-062 | 124 | 157 | 0.79 | 0.0577 | 0.0020 | 0.6310 | 0.0210 | 0.0792 | 0.0012 | 520  | 73  | 496  | 13 | 491  | 7  | 101.0 | 491        | 7  |
| LT08A-063 | 73  | 60  | 1.21 | 0.1027 | 0.0028 | 4.007  | 0.1100 | 0.2831 | 0.0042 | 1673 | 49  | 1636 | 22 | 1607 | 21 | 104.1 | 1673       | 49 |
| LT08A-064 | 68  | 115 | 0.59 | 0.0745 | 0.0021 | 1.886  | 0.0530 | 0.1835 | 0.0026 | 1056 | 55  | 1076 | 19 | 1086 | 14 | 97.2  | 1056       | 55 |
| LT08A-065 | 222 | 409 | 0.54 | 0.0561 | 0.0015 | 0.6000 | 0.0160 | 0.0775 | 0.0011 | 458  | 59  | 477  | 10 | 481  | 6  | 99.2  | 481        | 6  |
| LT08A-066 | 201 | 383 | 0.52 | 0.0540 | 0.0015 | 0.5050 | 0.0140 | 0.0678 | 0.0010 | 370  | 63  | 415  | 10 | 423  | 6  | 98.1  | 423        | 6  |
| LT08A-067 | 170 | 215 | 0.79 | 0.0709 | 0.0018 | 1.618  | 0.0420 | 0.1654 | 0.0023 | 956  | 52  | 977  | 16 | 987  | 13 | 99.0  | 987        | 13 |
| LT08A-068 | 369 | 574 | 0.64 | 0.0569 | 0.0015 | 0.5820 | 0.0150 | 0.0741 | 0.0010 | 488  | 56  | 465  | 10 | 461  | 6  | 100.9 | 461        | 6  |
| LT08A-069 | 19  | 12  | 1.52 | 0.1025 | 0.0047 | 4.037  | 0.1830 | 0.2855 | 0.0057 | 1670 | 83  | 1642 | 37 | 1619 | 29 | 103.2 | 1670       | 83 |
| LT08A-070 | 70  | 135 | 0.52 | 0.0584 | 0.0022 | 0.5750 | 0.0220 | 0.0714 | 0.0011 | 546  | 82  | 461  | 14 | 445  | 7  | 103.6 | 445        | 7  |
| LT08A-071 | 73  | 193 | 0.38 | 0.1549 | 0.0037 | 8.883  | 0.2140 | 0.4158 | 0.0058 | 2401 | 39  | 2326 | 22 | 2241 | 26 | 107.1 | 2401       | 39 |
| LT08A-072 | 200 | 155 | 1.29 | 0.0780 | 0.0026 | 1.537  | 0.0510 | 0.1429 | 0.0022 | 1146 | 65  | 945  | 21 | 861  | 12 | 109.8 | 861        | 12 |
| LT08A-073 | 350 | 412 | 0.85 | 0.0583 | 0.0017 | 0.5910 | 0.0170 | 0.0735 | 0.0010 | 542  | 62  | 471  | 11 | 457  | 6  | 103.1 | 457        | 6  |
| LT08A-074 | 116 | 175 | 0.66 | 0.0525 | 0.0021 | 0.3570 | 0.0140 | 0.0492 | 0.0008 | 309  | 90  | 310  | 11 | 310  | 5  | 100.0 | 310        | 5  |
| LT08A-075 | 145 | 552 | 0.26 | 0.0559 | 0.0015 | 0.5250 | 0.0150 | 0.0681 | 0.0010 | 448  | 60  | 428  | 10 | 425  | 6  | 100.7 | 425        | 6  |
| LT08A-076 | 105 | 172 | 0.61 | 0.0594 | 0.0025 | 0.6130 | 0.0300 | 0.0749 | 0.0012 | 582  | 90  | 485  | 19 | 465  | 7  | 104.3 | 465        | 7  |
| LT08A-077 | 111 | 250 | 0.44 | 0.0516 | 0.0019 | 0.3390 | 0.0120 | 0.0476 | 0.0007 | 266  | 81  | 296  | 9  | 300  | 4  | 98.7  | 300        | 4  |
| LT08A-078 | 144 | 500 | 0.29 | 0.0553 | 0.0016 | 0.5520 | 0.0160 | 0.0725 | 0.0010 | 423  | 62  | 447  | 10 | 451  | 6  | 99.1  | 451        | 6  |
| LT08A-079 | 113 | 223 | 0.50 | 0.0683 | 0.0019 | 1.312  | 0.0370 | 0.1393 | 0.0020 | 878  | 57  | 851  | 16 | 841  | 11 | 101.2 | 841        | 11 |
| LT08A-080 | 350 | 87  | 4.02 | 0.0686 | 0.0023 | 1.421  | 0.0470 | 0.1502 | 0.0023 | 887  | 67  | 898  | 20 | 902  | 13 | 99.6  | 902        | 13 |
| LT08A-081 | 43  | 68  | 0.63 | 0.0592 | 0.0033 | 0.3950 | 0.0220 | 0.0485 | 0.0009 | 573  | 120 | 338  | 16 | 305  | 5  | 110.8 | Discordant |    |
| LT08A-082 | 141 | 262 | 0.54 | 0.0537 | 0.0018 | 0.5410 | 0.0180 | 0.0730 | 0.0011 | 358  | 72  | 439  | 12 | 454  | 6  | 96.7  | 454        | 6  |
| LT08A-083 | 31  | 52  | 0.60 | 0.0525 | 0.0033 | 0.4190 | 0.0260 | 0.0579 | 0.0011 | 308  | 138 | 356  | 18 | 363  | 7  | 98.1  | 363        | 7  |
| LT08A-084 | 88  | 136 | 0.65 | 0.0518 | 0.0022 | 0.4110 | 0.0180 | 0.0576 | 0.0009 | 275  | 97  | 350  | 13 | 361  | 6  | 97.0  | 361        | 6  |
| LT08A-085 | 102 | 164 | 0.62 | 0.1188 | 0.0031 | 5.730  | 0.1510 | 0.3499 | 0.0050 | 1938 | 46  | 1936 | 23 | 1934 | 24 | 100.2 | 1938       | 46 |
| LT08A-086 | 261 | 456 | 0.57 | 0.0514 | 0.0017 | 0.3420 | 0.0110 | 0.0482 | 0.0007 | 258  | 73  | 299  | 8  | 304  | 4  | 98.4  | 304        | 4  |
| LT08A-087 | 190 | 432 | 0.44 | 0.0568 | 0.0019 | 0.5390 | 0.0170 | 0.0689 | 0.0010 | 483  | 71  | 438  | 12 | 429  | 6  | 102.1 | 429        | 6  |
| LT08A-088 | 71  | 179 | 0.40 | 0.0537 | 0.0020 | 0.4670 | 0.0180 | 0.0631 | 0.0010 | 358  | 84  | 389  | 12 | 394  | 6  | 98.7  | 394        | 6  |
| LT08A-089 | 114 | 166 | 0.69 | 0.0734 | 0.0022 | 1.768  | 0.0520 | 0.1746 | 0.0025 | 1025 | 59  | 1034 | 19 | 1038 | 14 | 98.7  | 1025       | 59 |
| LT08A-090 | 31  | 59  | 0.53 | 0.0524 | 0.0034 | 0.3500 | 0.0220 | 0.0485 | 0.0009 | 302  | 146 | 305  | 17 | 305  | 6  | 100.0 | 305        | 6  |
| LT08A-091 | 420 | 301 | 1.39 | 0.0602 | 0.0058 | 0.3490 | 0.0390 | 0.0420 | 0.0010 | 610  | 210 | 304  | 30 | 265  | 6  | 114.7 | Discordant |    |
| LT08A-092 | 36  | 45  | 0.79 | 0.1168 | 0.0036 | 5.648  | 0.1730 | 0.3507 | 0.0054 | 1908 | 54  | 1923 | 26 | 1938 | 26 | 98.5  | 1908       | 54 |
| LT08A-093 | 336 | 451 | 0.74 | 0.0577 | 0.0017 | 0.5840 | 0.0180 | 0.0734 | 0.0011 | 517  | 65  | 467  | 11 | 457  | 6  | 102.2 | 457        | 6  |
| LT08A-094 | 237 | 324 | 0.73 | 0.0556 | 0.0018 | 0.5610 | 0.0180 | 0.0732 | 0.0011 | 436  | 71  | 452  | 12 | 455  | 6  | 99.3  | 455        | 6  |

Sample LT09A, quartz wacke, Late Carboniferous Ayilhe Formation along Kule-Bayinbuluke highway of STB, (Han et al., 2016, Geology)

|           |     |      |      |        |        |        |        |        |        |      |     |      |    |      |    |       |            |    |
|-----------|-----|------|------|--------|--------|--------|--------|--------|--------|------|-----|------|----|------|----|-------|------------|----|
| LT09A-001 | 116 | 102  | 1.13 | 0.0631 | 0.0021 | 1.071  | 0.0360 | 0.1232 | 0.0018 | 711  | 70  | 739  | 17 | 749  | 11 | 98.7  | 749        | 11 |
| LT09A-002 | 112 | 178  | 0.63 | 0.0571 | 0.0018 | 0.5920 | 0.0180 | 0.0752 | 0.0011 | 494  | 67  | 472  | 12 | 468  | 6  | 100.9 | 468        | 6  |
| LT09A-003 | 45  | 101  | 0.44 | 0.0690 | 0.0022 | 1.251  | 0.0390 | 0.1314 | 0.0019 | 899  | 64  | 824  | 18 | 796  | 11 | 103.5 | 796        | 11 |
| LT09A-004 | 155 | 267  | 0.58 | 0.0558 | 0.0015 | 0.5170 | 0.0140 | 0.0672 | 0.0009 | 442  | 59  | 423  | 9  | 420  | 6  | 100.7 | 420        | 6  |
| LT09A-005 | 69  | 106  | 0.65 | 0.0638 | 0.0018 | 1.258  | 0.0350 | 0.1429 | 0.0020 | 736  | 58  | 827  | 16 | 861  | 11 | 96.1  | 861        | 11 |
| LT09A-006 | 251 | 326  | 0.77 | 0.0556 | 0.0014 | 0.5340 | 0.0140 | 0.0697 | 0.0010 | 437  | 56  | 435  | 9  | 434  | 6  | 100.2 | 434        | 6  |
| LT09A-007 | 152 | 248  | 0.61 | 0.0573 | 0.0016 | 0.5370 | 0.0150 | 0.0680 | 0.0009 | 501  | 60  | 436  | 10 | 424  | 6  | 102.8 | 424        | 6  |
| LT09A-008 | 91  | 233  | 0.39 | 0.1569 | 0.0027 | 9.946  | 0.1800 | 0.4597 | 0.0060 | 2422 | 28  | 2430 | 17 | 2438 | 26 | 99.3  | 2422       | 28 |
| LT09A-009 | 51  | 42   | 1.20 | 0.1654 | 0.0034 | 11.623 | 0.2470 | 0.5096 | 0.0073 | 2511 | 34  | 2575 | 20 | 2655 | 31 | 94.6  | 2511       | 34 |
| LT09A-010 | 296 | 335  | 0.88 | 0.0569 | 0.0014 | 0.5450 | 0.0140 | 0.0695 | 0.0009 | 488  | 54  | 442  | 9  | 433  | 6  | 102.1 | 433        | 6  |
| LT09A-011 | 35  | 49   | 0.71 | 0.1095 | 0.0026 | 5.032  | 0.1200 | 0.3332 | 0.0048 | 1791 | 42  | 1825 | 20 | 1854 | 23 | 96.6  | 1791       | 42 |
| LT09A-012 | 254 | 544  | 0.47 | 0.0691 | 0.0016 | 0.6710 | 0.0160 | 0.0704 | 0.0010 | 903  | 47  | 522  | 10 | 439  | 6  | 118.9 | Discordant |    |
| LT09A-013 | 36  | 237  | 0.15 | 0.1212 | 0.0023 | 4.723  | 0.1000 | 0.2827 | 0.0038 | 1974 | 32  | 1771 | 18 | 1605 | 19 | 123.0 | Discordant |    |
| LT09A-014 | 154 | 261  | 0.59 | 0.0568 | 0.0015 | 0.6370 | 0.0170 | 0.0812 | 0.0011 | 485  | 56  | 500  | 11 | 503  | 7  | 99.4  | 503        | 7  |
| LT09A-015 | 261 | 285  | 0.91 | 0.0557 | 0.0015 | 0.5780 | 0.0150 | 0.0751 | 0.0010 | 442  | 56  | 463  | 10 | 467  | 6  | 99.1  | 467        | 6  |
| LT09A-016 | 216 | 405  | 0.53 | 0.0566 | 0.0014 | 0.5350 | 0.0130 | 0.0685 | 0.0009 | 476  | 52  | 435  | 9  | 427  | 6  | 101.9 | 427        | 6  |
| LT09A-017 | 192 | 368  | 0.52 | 0.0543 | 0.0014 | 0.5370 | 0.0140 | 0.0717 | 0.0010 | 383  | 54  | 436  | 9  | 446  | 6  | 97.8  | 446        | 6  |
| LT09A-018 | 80  | 132  | 0.60 | 0.0905 | 0.0019 | 3.178  | 0.0700 | 0.2547 | 0.0035 | 1435 | 39  | 1452 | 17 | 1463 | 18 | 98.1  | 1435       | 39 |
| LT09A-019 | 192 | 673  | 0.29 | 0.0556 | 0.0015 | 0.5750 | 0.0180 | 0.0750 | 0.0010 | 436  | 56  | 461  | 12 | 466  | 6  | 98.9  | 466        | 6  |
| LT09A-020 | 80  | 139  | 0.58 | 0.0689 | 0.0018 | 1.365  | 0.0350 | 0.1436 | 0.0020 | 896  | 51  | 874  | 15 | 865  | 11 | 101.0 | 865        | 11 |
| LT09A-021 | 74  | 164  | 0.45 | 0.0630 | 0.0020 | 0.6410 | 0.0200 | 0.0738 | 0.0011 | 708  | 64  | 503  | 12 | 459  | 6  | 109.6 | 459        | 6  |
| LT09A-022 | 128 | 184  | 0.69 | 0.0570 | 0.0018 | 0.5630 | 0.0180 | 0.0717 | 0.0010 | 492  | 66  | 454  | 11 | 446  | 6  | 101.8 | 446        | 6  |
| LT09A-023 | 123 | 219  | 0.56 | 0.1636 | 0.0029 | 10.366 | 0.1950 | 0.4595 | 0.0060 | 2493 | 29  | 2468 | 17 | 2437 | 27 | 102.3 | 2493       | 29 |
| LT09A-024 | 67  | 233  | 0.29 | 0.0739 | 0.0017 | 1.622  | 0.0390 | 0.1592 | 0.0022 | 1039 | 45  | 979  | 15 | 952  | 12 | 102.8 | 952        | 12 |
| LT09A-025 | 147 | 218  | 0.67 | 0.0592 | 0.0017 | 0.5990 | 0.0180 | 0.0734 | 0.0010 | 573  | 61  | 477  | 11 | 457  | 6  | 104.4 | 457        | 6  |
| LT09A-026 | 132 | 124  | 1.07 | 0.0604 | 0.0026 | 0.6370 | 0.0270 | 0.0764 | 0.0012 | 619  | 87  | 501  | 16 | 475  | 7  | 105.5 | 475        | 7  |
| LT09A-027 | 177 | 327  | 0.54 | 0.0561 | 0.0015 | 0.5240 | 0.0140 | 0.0677 | 0.0009 | 457  | 57  | 428  | 9  | 422  | 6  | 101.4 | 422        | 6  |
| LT09A-028 | 276 | 536  | 0.52 | 0.1533 | 0.0027 | 8.98   | 0.1610 | 0.4067 | 0.0053 | 2383 | 29  | 2296 | 17 | 2200 | 24 | 108.3 | 2383       | 29 |
| LT09A-029 | 62  | 137  | 0.45 | 0.0770 | 0.0018 | 2.143  | 0.0520 | 0.2018 | 0.0028 | 1121 | 45  | 1163 | 17 | 1185 | 15 | 94.6  | 1121       | 45 |
| LT09A-030 | 135 | 425  | 0.32 | 0.0702 | 0.0014 | 1.561  | 0.0330 | 0.1613 | 0.0021 | 933  | 40  | 955  | 13 | 964  | 12 | 99.1  | 964        | 12 |
| LT09A-031 | 79  | 73   | 1.08 | 0.1677 | 0.0034 | 10.778 | 0.2270 | 0.4662 | 0.0065 | 2534 | 33  | 2504 | 20 | 2467 | 28 | 102.7 | 2534       | 33 |
| LT09A-032 | 148 | 223  | 0.66 | 0.0576 | 0.0017 | 0.5970 | 0.0180 | 0.0751 | 0.0011 | 515  | 62  | 475  | 11 | 467  | 6  | 101.7 | 467        | 6  |
| LT09A-033 | 50  | 143  | 0.35 | 0.0567 | 0.0020 | 0.5570 | 0.0200 | 0.0712 | 0.0011 | 481  | 75  | 449  | 13 | 443  | 6  | 101.4 | 443        | 6  |
| LT09A-034 | 98  | 189  | 0.51 | 0.0579 | 0.0018 | 0.5900 | 0.0190 | 0.0738 | 0.0011 | 527  | 66  | 471  | 12 | 459  | 6  | 102.6 | 459        | 6  |
| LT09A-035 | 149 | 272  | 0.55 | 0.0561 | 0.0020 | 0.5040 | 0.0220 | 0.0652 | 0.0010 | 456  | 77  | 414  | 15 | 407  | 6  | 101.7 | 407        | 6  |
| LT09A-036 | 118 | 210  | 0.56 | 0.0577 | 0.0022 | 0.5550 | 0.0260 | 0.0698 | 0.0011 | 517  | 83  | 448  | 17 | 435  | 6  | 103.0 | 435        | 6  |
| LT09A-037 | 108 | 252  | 0.43 | 0.0579 | 0.0022 | 0.5180 | 0.0230 | 0.0649 | 0.0010 | 528  | 82  | 424  | 15 | 405  | 6  | 104.7 | 405        | 6  |
| LT09A-038 | 190 | 335  | 0.57 | 0.0564 | 0.0015 | 0.5590 | 0.0150 | 0.0720 | 0.0010 | 467  | 58  | 451  | 10 | 448  | 6  | 100.7 | 448        | 6  |
| LT09A-039 | 131 | 160  | 0.81 | 0.0641 | 0.0021 | 0.6580 | 0.0210 | 0.0744 | 0.0011 | 745  | 66  | 513  | 13 | 463  | 7  | 110.8 | Discordant |    |
| LT09A-040 | 287 | 358  | 0.80 | 0.0578 | 0.0015 | 0.5930 | 0.0160 | 0.0745 | 0.0010 | 520  | 56  | 473  | 10 | 463  | 6  | 102.2 | 463        | 6  |
| LT09A-041 | 197 | 270  | 0.73 | 0.0533 | 0.0016 | 0.4770 | 0.0140 | 0.0650 | 0.0009 | 341  | 65  | 396  | 10 | 406  | 6  | 97.5  | 406        | 6  |
| LT09A-042 | 160 | 245  | 0.65 | 0.0566 | 0.0017 | 0.5480 | 0.0170 | 0.0702 | 0.0010 | 477  | 65  | 444  | 11 | 437  | 6  | 101.6 | 437        | 6  |
| LT09A-043 | 109 | 231  | 0.47 | 0.0539 | 0.0022 | 0.3610 | 0.0170 | 0.0485 | 0.0008 | 367  | 88  | 313  | 13 | 305  | 5  | 102.6 | 305        | 5  |
| LT09A-044 | 54  | 80   | 0.67 | 0.0565 | 0.0026 | 0.5200 | 0.0240 | 0.0667 | 0.0011 | 473  | 101 | 425  | 16 | 416  | 7  | 102.2 | 416        | 7  |
| LT09A-045 | 42  | 67   | 0.63 | 0.1628 | 0.0036 | 10.868 | 0.2470 | 0.4842 | 0.0068 | 2485 | 36  | 2512 | 21 | 2546 | 30 | 97.6  | 2485       | 36 |
| LT09A-046 | 242 | 263  | 0.92 | 0.0670 | 0.0016 | 1.290  | 0.0320 | 0.1396 | 0.0019 | 838  | 49  | 841  | 14 | 842  | 11 | 99.9  | 842        | 11 |
| LT09A-047 | 257 | 321  | 0.80 | 0.0668 | 0.0016 | 1.246  | 0.0300 | 0.1353 | 0.0018 | 831  | 48  | 822  | 14 | 818  | 10 | 100.5 | 818        | 10 |
| LT09A-048 | 100 | 199  | 0.50 | 0.0566 | 0.0018 | 0.5570 | 0.0180 | 0.0715 | 0.0010 | 474  | 69  | 450  | 12 | 445  | 6  | 101.1 | 445        | 6  |
| LT09A-049 | 59  | 68   | 0.86 | 0.0515 | 0.0031 | 4.020  | 0.0240 | 0.0567 | 0.0011 | 262  | 135 | 343  | 17 | 355  | 6  | 96.6  | 355        | 6  |
| LT09A-050 | 137 | 117  | 1.17 | 0.1628 | 0.0035 | 10.823 | 0.2410 | 0.4822 | 0.0066 | 2485 | 35  | 2508 | 21 | 2537 | 29 | 98.0  | 2485       | 35 |
| LT09A-051 | 44  | 1388 | 0.03 | 0.0561 | 0.0013 | 0.5070 | 0.0120 | 0.0656 | 0.0009 | 454  | 49  | 416  | 8  | 409  | 5  | 101.7 | 409        | 5  |
| LT09A-052 | 46  | 83   | 0.56 | 0.0638 | 0.0034 | 0.6160 | 0.0320 | 0.0701 | 0.0013 | 734  | 109 | 488  | 20 | 437  | 8  | 111.7 | Discordant |    |
| LT09A-053 | 228 | 265  | 0.86 | 0.0549 | 0.0020 | 0.4000 | 0.0140 | 0.0528 | 0.0008 | 407  | 77  | 341  | 10 | 332  | 5  | 102.7 | 332        | 5  |
| LT09A-054 | 479 | 381  | 1.25 | 0.0621 | 0.0017 | 0.6120 | 0.0170 | 0.0715 | 0.0010 | 676  | 57  | 485  | 11 | 445  | 6  | 109.0 | 445        | 6  |
| LT09A-055 | 148 | 305  | 0.49 | 0.1380 | 0.0030 | 7.823  | 0.1730 | 0.4112 | 0.0055 | 2202 | 36  | 2211 | 20 | 2220 | 25 | 99.2  | 2202       | 36 |
| LT09A-056 | 52  | 123  | 0.42 | 0.0657 | 0.0020 | 1.255  | 0.0380 | 0.1386 | 0.0020 | 797  | 62  | 826  | 17 | 837  | 11 | 98.7  | 837        | 11 |
| LT09A-057 | 231 | 337  | 0.69 | 0.0539 | 0.0016 | 0.5050 | 0.0150 | 0.0680 | 0.0010 | 366  | 65  | 415  | 10 | 424  | 6  | 97.9  | 424        | 6  |
| LT09A-058 | 227 | 490  | 0.46 | 0.2237 | 0.0048 | 17.834 | 0.3960 | 0.5782 | 0.0078 | 3008 | 34  | 2981 | 21 | 2942 | 32 | 102.2 | 3008       | 34 |
| LT09A-059 | 138 | 250  | 0.55 | 0.0560 | 0.0018 | 0.5230 | 0.0170 | 0.0677 | 0.0010 | 454  | 71  | 427  | 11 | 422  | 6  | 101.2 | 422        | 6  |
| LT09A-060 | 66  | 244  | 0.27 | 0.0739 | 0.0019 | 1.745  | 0.0450 | 0.1714 | 0.0024 | 1038 | 50  | 1025 | 17 | 1020 | 13 | 101.8 | 1038       | 50 |
| LT09A-061 | 101 | 224  | 0.45 | 0.1212 | 0.0030 | 5.754  | 0.1420 | 0.3444 | 0.0049 | 1974 | 42  | 1940 | 21 | 1908 | 23 | 103.5 | 1974       | 42 |
| LT09A-062 | 288 | 615  | 0.47 | 0.0568 | 0.0018 | 0.5570 | 0.0210 | 0.0711 | 0.0010 | 484  | 67  | 449  | 13 | 443  | 6  | 101.4 | 443        | 6  |
| LT09A-063 | 152 | 220  | 0.69 | 0.0562 | 0.0019 | 0.5300 | 0.0180 | 0.0684 | 0.0010 | 460  | 72  | 432  | 12 | 427  | 6  | 101.2 | 427        | 6  |
| LT09A-064 | 56  | 147  | 0.38 | 0.1216 | 0.0029 | 6.214  | 0.1530 | 0.3706 | 0.0052 | 1980 | 42  | 2006 | 21 | 2032 | 24 | 97.4  | 1980       | 42 |

|           |     |     |      |        |        |        |        |        |        |      |     |      |    |      |    |       |            |    |
|-----------|-----|-----|------|--------|--------|--------|--------|--------|--------|------|-----|------|----|------|----|-------|------------|----|
| LT09A-065 | 175 | 369 | 0.47 | 0.0553 | 0.0016 | 0.5620 | 0.0160 | 0.0737 | 0.0011 | 426  | 63  | 453  | 11 | 459  | 6  | 98.7  | 459        | 6  |
| LT09A-066 | 131 | 137 | 0.96 | 0.0679 | 0.0021 | 1.325  | 0.0400 | 0.1416 | 0.0021 | 864  | 61  | 857  | 18 | 854  | 12 | 100.4 | 854        | 12 |
| LT09A-067 | 64  | 95  | 0.67 | 0.0550 | 0.0025 | 0.5290 | 0.0240 | 0.0698 | 0.0011 | 410  | 101 | 431  | 16 | 435  | 7  | 99.1  | 435        | 7  |
| LT09A-068 | 258 | 227 | 1.13 | 0.0538 | 0.0021 | 0.5130 | 0.0200 | 0.0691 | 0.0011 | 362  | 87  | 420  | 13 | 431  | 6  | 97.4  | 431        | 6  |
| LT09A-069 | 61  | 186 | 0.33 | 0.0550 | 0.0022 | 0.4680 | 0.0190 | 0.0618 | 0.0010 | 413  | 88  | 390  | 13 | 386  | 6  | 101.0 | 386        | 6  |
| LT09A-070 | 256 | 598 | 0.43 | 0.0568 | 0.0016 | 0.5350 | 0.0150 | 0.0684 | 0.0010 | 483  | 60  | 435  | 10 | 427  | 6  | 101.9 | 427        | 6  |
| LT09A-071 | 261 | 529 | 0.49 | 0.0580 | 0.0016 | 0.5900 | 0.0170 | 0.0738 | 0.0011 | 528  | 60  | 471  | 11 | 459  | 6  | 102.6 | 459        | 6  |
| LT09A-072 | 81  | 129 | 0.62 | 0.0798 | 0.0023 | 2.228  | 0.0650 | 0.2025 | 0.0030 | 1192 | 56  | 1190 | 20 | 1189 | 16 | 100.3 | 1192       | 56 |
| LT09A-073 | 133 | 217 | 0.62 | 0.0545 | 0.0019 | 0.5180 | 0.0180 | 0.0689 | 0.0010 | 392  | 78  | 424  | 12 | 429  | 6  | 98.8  | 429        | 6  |
| LT09A-074 | 60  | 157 | 0.38 | 0.0608 | 0.0025 | 0.6140 | 0.0240 | 0.0733 | 0.0012 | 631  | 85  | 486  | 15 | 456  | 7  | 106.6 | 456        | 7  |
| LT09A-075 | 138 | 239 | 0.58 | 0.0570 | 0.0020 | 0.5290 | 0.0180 | 0.0673 | 0.0010 | 492  | 74  | 431  | 12 | 420  | 6  | 102.6 | 420        | 6  |
| LT09A-076 | 72  | 159 | 0.46 | 0.0586 | 0.0022 | 0.5510 | 0.0210 | 0.0683 | 0.0011 | 550  | 81  | 446  | 14 | 426  | 6  | 104.7 | 426        | 6  |
| LT09A-077 | 107 | 226 | 0.47 | 0.0590 | 0.0032 | 0.4920 | 0.0290 | 0.0604 | 0.0010 | 568  | 117 | 406  | 20 | 378  | 6  | 107.4 | 378        | 6  |
| LT09A-078 | 80  | 381 | 0.21 | 0.0683 | 0.0019 | 1.308  | 0.0360 | 0.1389 | 0.0020 | 878  | 56  | 849  | 16 | 839  | 11 | 101.2 | 839        | 11 |
| LT09A-079 | 94  | 180 | 0.52 | 0.0558 | 0.0022 | 0.5580 | 0.0210 | 0.0725 | 0.0011 | 446  | 84  | 450  | 14 | 451  | 7  | 99.8  | 451        | 7  |
| LT09A-080 | 174 | 221 | 0.79 | 0.0677 | 0.0020 | 1.318  | 0.0390 | 0.1411 | 0.0021 | 860  | 61  | 853  | 17 | 851  | 12 | 100.2 | 851        | 12 |
| LT09A-081 | 19  | 57  | 0.34 | 0.0491 | 0.0028 | 0.5050 | 0.0280 | 0.0746 | 0.0013 | 152  | 124 | 415  | 19 | 464  | 8  | 89.4  | Discordant |    |
| LT09A-082 | 262 | 208 | 1.26 | 0.1915 | 0.0050 | 14.315 | 0.3770 | 0.5424 | 0.0077 | 2755 | 42  | 2771 | 25 | 2794 | 32 | 98.6  | 2755       | 42 |
| LT09A-083 | 308 | 219 | 1.41 | 0.0732 | 0.0021 | 1.676  | 0.0490 | 0.1661 | 0.0024 | 1020 | 57  | 1000 | 19 | 991  | 13 | 100.9 | 991        | 13 |
| LT09A-084 | 91  | 103 | 0.88 | 0.1124 | 0.0032 | 4.852  | 0.1390 | 0.3132 | 0.0046 | 1839 | 50  | 1794 | 24 | 1756 | 23 | 104.7 | 1839       | 50 |
| LT09A-085 | 136 | 195 | 0.70 | 0.1685 | 0.0046 | 10.210 | 0.2780 | 0.4397 | 0.0063 | 2542 | 44  | 2454 | 25 | 2349 | 28 | 108.2 | 2542       | 44 |
| LT09A-086 | 44  | 71  | 0.62 | 0.1250 | 0.0037 | 5.994  | 0.1790 | 0.3481 | 0.0053 | 2028 | 51  | 1975 | 26 | 1925 | 25 | 105.4 | 2028       | 51 |
| LT09A-087 | 138 | 241 | 0.57 | 0.0541 | 0.0020 | 0.5020 | 0.0180 | 0.0674 | 0.0010 | 374  | 80  | 413  | 12 | 420  | 6  | 98.3  | 420        | 6  |
| LT09A-088 | 155 | 220 | 0.70 | 0.1318 | 0.0037 | 6.953  | 0.1930 | 0.3829 | 0.0055 | 2121 | 47  | 2105 | 25 | 2090 | 26 | 101.5 | 2121       | 47 |
| LT09A-089 | 269 | 250 | 1.07 | 0.0590 | 0.0021 | 0.5830 | 0.0200 | 0.0716 | 0.0011 | 568  | 74  | 466  | 13 | 446  | 6  | 104.5 | 446        | 6  |
| LT09A-090 | 107 | 263 | 0.41 | 0.0565 | 0.0020 | 0.5650 | 0.0200 | 0.0727 | 0.0011 | 471  | 76  | 455  | 13 | 452  | 7  | 100.7 | 452        | 7  |
| LT09A-091 | 26  | 27  | 0.95 | 0.1156 | 0.0043 | 5.404  | 0.1980 | 0.3391 | 0.0059 | 1890 | 64  | 1886 | 31 | 1882 | 28 | 100.4 | 1890       | 64 |
| LT09A-092 | 162 | 295 | 0.55 | 0.0562 | 0.0020 | 0.5230 | 0.0180 | 0.0675 | 0.0010 | 461  | 76  | 427  | 12 | 421  | 6  | 101.4 | 421        | 6  |
| LT09A-093 | 42  | 51  | 0.81 | 0.1572 | 0.0049 | 9.587  | 0.2980 | 0.4425 | 0.0070 | 2426 | 51  | 2396 | 29 | 2362 | 31 | 102.7 | 2426       | 51 |
| LT09A-094 | 136 | 233 | 0.58 | 0.0553 | 0.0021 | 0.5100 | 0.0190 | 0.0669 | 0.0010 | 426  | 81  | 419  | 13 | 418  | 6  | 100.2 | 418        | 6  |
| LT09A-095 | 115 | 241 | 0.48 | 0.0571 | 0.0022 | 0.5590 | 0.0210 | 0.0712 | 0.0011 | 494  | 82  | 451  | 14 | 443  | 7  | 101.8 | 443        | 7  |
| LT09A-096 | 140 | 261 | 0.53 | 0.0604 | 0.0023 | 0.5950 | 0.0220 | 0.0715 | 0.0011 | 618  | 80  | 474  | 14 | 445  | 7  | 106.5 | 445        | 7  |
| LT09A-097 | 100 | 235 | 0.42 | 0.0576 | 0.0021 | 0.5460 | 0.0200 | 0.0688 | 0.0011 | 515  | 78  | 443  | 13 | 429  | 6  | 103.3 | 429        | 6  |
| LT09A-098 | 101 | 184 | 0.55 | 0.1730 | 0.0051 | 11.356 | 0.3330 | 0.4764 | 0.0070 | 2586 | 48  | 2553 | 27 | 2512 | 31 | 102.9 | 2586       | 48 |
| LT09A-099 | 280 | 418 | 0.67 | 0.0556 | 0.0019 | 0.5190 | 0.0180 | 0.0678 | 0.0010 | 434  | 74  | 424  | 12 | 423  | 6  | 100.2 | 423        | 6  |
| LT09A-100 | 79  | 142 | 0.56 | 0.0680 | 0.0024 | 1.250  | 0.0440 | 0.1334 | 0.0021 | 868  | 72  | 823  | 20 | 807  | 12 | 102.0 | 807        | 12 |
| LT09A-101 | 80  | 95  | 0.83 | 0.0628 | 0.0061 | 0.4560 | 0.0480 | 0.0528 | 0.0011 | 700  | 200 | 382  | 33 | 331  | 6  | 115.4 | Discordant |    |
| LT09A-102 | 81  | 153 | 0.53 | 0.0536 | 0.0024 | 0.3750 | 0.0190 | 0.0507 | 0.0007 | 355  | 98  | 323  | 14 | 319  | 4  | 101.3 | 319        | 4  |
| LT09A-103 | 66  | 74  | 0.90 | 0.0572 | 0.0026 | 0.5410 | 0.0240 | 0.0686 | 0.0010 | 499  | 97  | 439  | 16 | 428  | 6  | 102.6 | 428        | 6  |
| LT09A-104 | 131 | 235 | 0.56 | 0.0581 | 0.0017 | 0.5480 | 0.0160 | 0.0685 | 0.0008 | 533  | 62  | 444  | 10 | 427  | 5  | 104.0 | 427        | 5  |
| LT09A-105 | 87  | 188 | 0.46 | 0.0571 | 0.0017 | 0.5930 | 0.0170 | 0.0754 | 0.0009 | 494  | 62  | 473  | 11 | 468  | 5  | 101.1 | 468        | 5  |
| LT09A-106 | 149 | 231 | 0.64 | 0.0571 | 0.0023 | 0.5630 | 0.0260 | 0.0715 | 0.0009 | 497  | 86  | 453  | 17 | 445  | 6  | 101.8 | 445        | 6  |
| LT09A-107 | 197 | 314 | 0.63 | 0.0572 | 0.0015 | 0.5570 | 0.0140 | 0.0707 | 0.0008 | 499  | 55  | 450  | 9  | 440  | 5  | 102.3 | 440        | 5  |
| LT09A-108 | 135 | 237 | 0.57 | 0.0584 | 0.0017 | 0.5500 | 0.0150 | 0.0684 | 0.0008 | 543  | 60  | 445  | 10 | 426  | 5  | 104.5 | 426        | 5  |
| LT09A-109 | 130 | 461 | 0.28 | 0.0978 | 0.0020 | 3.771  | 0.0750 | 0.2797 | 0.0031 | 1582 | 37  | 1587 | 16 | 1590 | 15 | 99.5  | 1582       | 37 |
| LT09A-110 | 215 | 453 | 0.47 | 0.0578 | 0.0018 | 0.5520 | 0.0170 | 0.0693 | 0.0008 | 522  | 65  | 446  | 11 | 432  | 5  | 103.2 | 432        | 5  |
| LT09A-111 | 300 | 537 | 0.56 | 0.0564 | 0.0014 | 0.5730 | 0.0140 | 0.0736 | 0.0008 | 469  | 54  | 460  | 9  | 458  | 5  | 100.4 | 458        | 5  |
| LT09A-112 | 91  | 114 | 0.80 | 0.0575 | 0.0023 | 0.5420 | 0.0210 | 0.0684 | 0.0009 | 510  | 85  | 440  | 14 | 426  | 6  | 103.3 | 426        | 6  |
| LT09A-113 | 108 | 152 | 0.71 | 0.0574 | 0.0021 | 0.5300 | 0.0190 | 0.0671 | 0.0009 | 505  | 76  | 432  | 12 | 418  | 5  | 103.3 | 418        | 5  |
| LT09A-114 | 155 | 193 | 0.80 | 0.0576 | 0.0018 | 0.5600 | 0.0170 | 0.0705 | 0.0009 | 513  | 67  | 451  | 11 | 439  | 5  | 102.7 | 439        | 5  |
| LT09A-115 | 64  | 52  | 1.22 | 0.0714 | 0.0026 | 1.339  | 0.0480 | 0.1360 | 0.0019 | 969  | 71  | 863  | 21 | 822  | 11 | 105.0 | 822        | 11 |

Sample MT64A, quartz arenite, Late Carboniferous Ayilihe Formation along Kule-Bayinbulake highway of STB, (Han et al., 2016, Geology)

|          |     |     |      |        |        |        |        |        |        |      |     |      |    |      |    |       |            |    |
|----------|-----|-----|------|--------|--------|--------|--------|--------|--------|------|-----|------|----|------|----|-------|------------|----|
| MT64A-01 | 188 | 157 | 1.20 | 0.1168 | 0.0021 | 5.955  | 0.1040 | 0.3697 | 0.0040 | 1908 | 32  | 1969 | 15 | 2028 | 19 | 94.1  | 1908       | 32 |
| MT64A-02 | 338 | 455 | 0.74 | 0.0562 | 0.0012 | 0.6020 | 0.0120 | 0.0776 | 0.0008 | 461  | 46  | 478  | 8  | 482  | 5  | 99.2  | 482        | 5  |
| MT64A-03 | 128 | 159 | 0.81 | 0.0564 | 0.0016 | 0.5800 | 0.0160 | 0.0745 | 0.0009 | 469  | 62  | 464  | 10 | 463  | 5  | 100.2 | 463        | 5  |
| MT64A-04 | 237 | 573 | 0.41 | 0.0560 | 0.0013 | 0.5770 | 0.0160 | 0.0748 | 0.0008 | 451  | 50  | 463  | 10 | 465  | 5  | 99.6  | 465        | 5  |
| MT64A-05 | 51  | 99  | 0.52 | 0.0585 | 0.0020 | 0.5850 | 0.0200 | 0.0725 | 0.0009 | 550  | 74  | 468  | 13 | 451  | 5  | 103.8 | 451        | 5  |
| MT64A-06 | 28  | 75  | 0.38 | 0.1354 | 0.0026 | 7.860  | 0.1470 | 0.4211 | 0.0047 | 2169 | 33  | 2215 | 17 | 2265 | 21 | 95.8  | 2169       | 33 |
| MT64A-07 | 15  | 31  | 0.49 | 0.0548 | 0.0039 | 0.5410 | 0.0380 | 0.0716 | 0.0012 | 404  | 158 | 439  | 25 | 446  | 7  | 98.4  | 446        | 7  |
| MT64A-08 | 58  | 75  | 0.77 | 0.1169 | 0.0023 | 5.825  | 0.1150 | 0.3613 | 0.0041 | 1910 | 35  | 1950 | 17 | 1988 | 19 | 96.1  | 1910       | 35 |
| MT64A-09 | 128 | 350 | 0.37 | 0.0565 | 0.0013 | 0.6020 | 0.0130 | 0.0773 | 0.0009 | 472  | 49  | 479  | 8  | 480  | 5  | 99.8  | 480        | 5  |
| MT64A-10 | 246 | 499 | 0.49 | 0.0582 | 0.0013 | 0.5630 | 0.0120 | 0.0701 | 0.0008 | 538  | 46  | 453  | 8  | 437  | 5  | 103.7 | 437        | 5  |
| MT64A-11 | 88  | 304 | 0.29 | 0.1204 | 0.0022 | 6.049  | 0.1060 | 0.3643 | 0.0039 | 1962 | 31  | 1983 | 15 | 2002 | 18 | 98.0  | 1962       | 31 |
| MT64A-12 | 142 | 294 | 0.48 | 0.1833 | 0.0032 | 13.044 | 0.2250 | 0.5160 | 0.0055 | 2683 | 29  | 2683 | 16 | 2682 | 23 | 100.0 | 2683       | 29 |
| MT64A-13 | 51  | 138 | 0.37 | 0.0650 | 0.0021 | 0.6770 | 0.0240 | 0.0754 | 0.0009 | 776  | 65  | 525  | 14 | 469  | 6  | 111.9 | Discordant |    |
| MT64A-14 | 84  | 351 | 0.24 | 0.0558 | 0.0013 | 0.5760 | 0.0130 | 0.0748 | 0.0008 | 445  | 50  | 462  | 8  | 465  | 5  | 99.4  | 465        | 5  |
| MT64A-15 | 152 | 303 | 0.50 | 0.0576 | 0.0014 | 0.5890 | 0.0140 | 0.0741 | 0.0008 | 515  | 51  | 470  | 9  | 461  | 5  | 102.0 | 461        | 5  |
| MT64A-16 | 59  | 90  | 0.66 | 0.0588 | 0.0021 | 0.5910 | 0.0210 | 0.0729 | 0.0009 | 559  | 76  | 471  | 13 | 454  | 6  | 103.7 | 454        | 6  |
| MT64A-17 | 132 | 226 | 0.58 | 0.0566 | 0.0015 | 0.5960 | 0.0150 | 0.0764 | 0.0009 | 476  | 56  | 475  | 10 | 475  | 5  | 100.0 | 475        | 5  |
| MT64A-18 | 171 | 310 | 0.55 | 0.0666 | 0.0014 | 1.310  | 0.0260 | 0.1427 | 0.0016 | 825  | 42  | 850  | 12 | 860  | 9  | 98.8  | 860        | 9  |
| MT64A-19 | 72  | 392 | 0.18 | 0.0772 | 0.0016 | 1.846  | 0.0380 | 0.1735 | 0.0019 | 1126 | 42  | 1062 | 14 | 1031 | 11 | 109.2 | 1126       | 42 |
| MT64A-20 | 113 | 112 | 1.01 | 0.0774 | 0.0018 | 2.288  | 0.0250 | 0.2087 | 0.0024 | 1132 | 46  | 1190 | 16 | 1222 | 13 | 92.6  | 1132       | 46 |
| MT64A-21 | 65  | 94  | 0.69 | 0.0586 | 0.0029 | 0.4430 | 0.0250 | 0.0549 | 0.0008 | 550  | 107 | 372  | 17 | 344  | 5  | 108.1 | 344        | 5  |
| MT64A-22 | 147 | 428 | 0.34 | 0.0563 | 0.0012 | 0.6280 | 0.0140 | 0.0809 | 0.0009 | 464  | 48  | 495  | 8  | 502  | 5  | 98.6  | 502        | 5  |
| MT64A-23 | 89  | 193 | 0.46 | 0.0555 | 0.0019 | 0.5590 | 0.0220 | 0.0731 | 0.0009 | 431  | 76  | 451  | 14 | 455  | 6  | 99.1  | 455        | 6  |
| MT64A-24 | 58  | 80  | 0.72 | 0.0575 | 0.0022 | 0.5740 | 0.0220 | 0.0725 | 0.0010 | 510  | 83  | 461  | 14 | 451  | 6  | 102.2 | 451        | 6  |
| MT64A-25 | 173 | 325 | 0.53 | 0.0575 | 0.0014 | 0.5970 | 0.0140 | 0.0754 | 0.0009 | 509  | 52  | 476  | 9  | 469  | 5  | 101.5 | 469        | 5  |
| MT64A-26 | 162 | 324 | 0.50 | 0.0564 | 0.0014 | 0.5650 | 0.0130 | 0.0726 | 0.0008 | 468  | 51  | 455  | 9  | 452  | 5  | 100.7 | 452        | 5  |
| MT64A-27 | 191 | 263 | 0.73 | 0.0564 | 0.0014 | 0.5510 | 0.0140 | 0.0709 | 0.0008 | 469  | 54  | 446  | 9  | 441  | 5  | 101.1 | 441        | 5  |
| MT64A-28 | 312 | 547 | 0.57 | 0.0561 | 0.0012 | 0.5810 | 0.0130 | 0.0751 | 0.0008 | 457  | 47  | 465  | 8  | 467  | 5  | 99.6  | 467        | 5  |
| MT64A-29 | 243 | 494 | 0.49 | 0.0568 | 0.0013 | 0.5750 | 0.0130 | 0.0735 | 0.0008 | 483  | 47  | 461  | 8  | 457  | 5  | 100.9 | 457        | 5  |
| MT64A-30 | 39  | 81  | 0.48 | 0.0576 | 0.0023 | 0.5570 | 0.0220 | 0.0701 | 0.0009 | 515  | 83  | 449  | 14 | 437  | 6  | 102.7 | 437        | 6  |
| MT64A-31 | 153 | 264 | 0.58 | 0.0564 | 0.0014 | 0.5940 | 0.0150 | 0.0763 | 0.0009 | 469  | 53  | 473  | 9  | 474  | 5  | 99.8  | 474        | 5  |
| MT64A-32 | 75  | 315 | 0.24 | 0.0555 | 0.0014 | 0.5460 | 0.0130 | 0.0713 | 0.0008 | 434  | 53  | 442  | 9  | 444  | 5  | 99.5  | 444        | 5  |
| MT64A-33 | 72  | 115 | 0.63 | 0.1413 | 0.0029 | 8.259  | 0.1650 | 0.4240 | 0.0048 | 2243 | 34  | 2260 | 18 | 2278 | 22 | 98.5  | 2243       | 34 |
| MT64A-34 | 19  | 60  | 0.32 | 0.0570 | 0.0027 | 0.6350 | 0.0290 | 0.0807 | 0.0012 | 492  | 99  | 499  | 18 | 500  | 7  | 99.8  | 500        | 7  |
| MT64A-35 | 93  | 151 | 0.61 | 0.0559 | 0.0018 | 0.5270 | 0.0160 | 0.0683 | 0.0008 | 449  | 67  | 430  | 11 | 426  | 5  | 100.9 | 426        | 5  |
| MT64A-36 | 119 | 351 | 0.34 | 0.0573 | 0.0015 | 0.5950 | 0.0180 | 0.0753 | 0.0009 | 504  | 55  | 474  | 11 | 468  | 5  | 101.3 | 468        | 5  |
| MT64A-37 | 23  | 51  | 0.45 | 0.0564 | 0.0028 | 0.5650 | 0.0270 | 0.0727 | 0.0011 | 467  | 104 | 455  | 18 | 452  | 6  | 100.7 | 452        | 6  |
| MT64A-38 | 74  | 151 | 0.49 | 0.0534 | 0.0018 | 0.4410 | 0.0150 | 0.0599 | 0.0007 | 348  | 74  | 371  | 10 | 375  | 5  | 98.9  | 375        | 5  |
| MT64A-39 | 29  | 41  | 0.71 | 0.0533 | 0.0031 | 0.5050 | 0.0290 | 0.0687 | 0.0011 | 343  | 127 | 415  | 20 | 428  | 6  | 97.0  | 428        | 6  |
| MT64A-40 | 197 | 298 | 0.66 | 0.0665 | 0.0018 | 0.4950 | 0.0130 | 0.0540 | 0.0006 | 821  | 53  | 408  | 9  | 339  | 4  | 120.4 | Discordant |    |
| MT64A-41 | 26  | 69  | 0.37 | 0.0575 | 0.0023 | 0.6300 | 0.0250 | 0.0795 | 0.0011 | 511  | 85  | 496  | 16 | 493  | 6  | 100.6 | 493        | 6  |
| MT64A-42 | 205 | 279 | 0.74 | 0.0526 | 0.0015 | 0.3780 | 0.0110 | 0.0520 | 0.0006 | 313  | 63  | 325  | 8  | 327  | 4  | 99.4  | 327        | 4  |
| MT64A-43 | 70  | 145 | 0.48 | 0.0553 | 0.0016 | 0.5690 | 0.0160 | 0.0747 | 0.0009 | 424  | 61  | 458  | 10 | 464  | 5  | 98.7  | 464        | 5  |
| MT64A-44 | 130 | 246 | 0.53 | 0.0580 | 0.0013 | 0.6120 | 0.0140 | 0.0765 | 0.0008 | 529  | 48  | 485  | 9  | 475  | 5  | 102.1 | 475        | 5  |
| MT64A-45 | 365 | 669 | 0.55 | 0.0557 | 0.0010 | 0.5540 | 0.0100 | 0.0728 | 0.0007 | 419  | 38  | 448  | 6  | 453  | 4  | 98.9  | 453        | 4  |
| MT64A-46 | 53  | 418 | 0.13 | 0.0552 | 0.0011 | 0.5640 | 0.0110 | 0.0734 | 0.0008 | 439  | 43  | 454  | 7  | 457  | 5  | 99.3  | 457        | 5  |
| MT64A-47 | 133 | 241 | 0.55 | 0.0553 | 0.0013 | 0.5950 | 0.0130 | 0.0780 | 0.0008 | 424  | 49  | 474  | 8  | 484  | 5  | 97.9  | 484        | 5  |
| MT64A-48 | 72  | 106 | 0.68 | 0.0580 | 0.0016 | 0.8010 | 0.0220 | 0.1001 | 0.0012 | 531  | 59  | 598  | 12 | 615  | 7  | 97.2  | 615        | 7  |
| MT64A-49 | 180 | 321 | 0.56 | 0.0671 | 0.0012 | 1.360  | 0.0230 | 0.1470 | 0.0015 | 842  | 35  | 872  | 10 | 884  | 8  | 98.6  | 884        | 8  |
| MT64A-50 | 337 | 406 | 0.83 | 0.0569 | 0.0011 | 0.5870 | 0.0110 | 0.0749 | 0.0008 | 487  | 42  | 469  | 7  | 465  | 5  | 100.9 | 465        | 5  |
| MT64A-51 | 78  | 184 | 0.42 | 0.0550 | 0.0016 | 0.4200 | 0.0120 | 0.0554 | 0.0006 | 412  | 63  | 356  | 9  | 348  | 4  | 102.3 | 348        | 4  |
| MT64A-52 | 58  | 63  | 0.92 | 0.0549 | 0.0025 | 0.5430 | 0.0240 | 0.0717 | 0.0010 | 410  | 98  | 441  | 16 | 447  | 6  | 98.7  | 447        | 6  |
| MT64A-53 | 69  | 122 | 0.56 | 0.0532 | 0.0019 | 0.4200 | 0.0140 | 0.0572 | 0.0007 | 339  | 76  | 356  | 10 | 358  | 4  | 99.4  | 358        | 4  |
| MT64A-54 | 272 | 321 | 0.85 | 0.0678 | 0.0012 | 1.380  | 0.0230 | 0.1476 | 0.0015 | 862  | 34  | 880  | 10 | 887  | 9  | 99.2  | 887        | 9  |
| MT64A-55 | 155 | 301 | 0.51 | 0.0552 | 0.0012 | 0.5960 | 0.0120 | 0.0784 | 0.0008 | 419  | 45  | 475  | 8  | 486  | 5  | 97.7  | 486        | 5  |
| MT64A-56 | 97  | 189 | 0.51 | 0.0554 | 0.0014 | 0.5700 | 0.0140 | 0.0746 | 0.0008 | 427  | 54  | 458  | 9  | 464  | 5  | 98.7  | 464        | 5  |
| MT64A-57 | 86  | 193 | 0.45 | 0.0585 | 0.0015 | 0.5800 | 0.0140 | 0.0719 | 0.0008 | 550  | 53  | 465  | 9  | 447  | 5  | 104.0 | 447        | 5  |
| MT64A-58 | 34  | 68  | 0.50 | 0.0590 | 0.0023 | 0.6240 | 0.0240 | 0.0767 | 0.0010 | 568  | 82  | 492  | 15 | 476  | 6  | 103.4 | 476        | 6  |
| MT64A-59 | 105 | 263 | 0.40 | 0.0566 | 0.0014 | 0.5490 | 0.0160 | 0.0703 | 0.0008 | 477  | 52  | 444  | 10 | 438  | 5  | 101.4 | 438        | 5  |
| MT64A-60 | 127 | 355 | 0.36 | 0.0566 | 0.0012 | 0.5780 | 0.0120 | 0.0740 | 0.0008 | 474  | 43  | 463  | 7  | 460  | 5  | 100.7 | 460        | 5  |
| MT64A-61 | 196 | 825 | 0.24 | 0.0548 | 0.0010 | 0.5310 | 0.0090 | 0.0703 | 0.0007 | 403  | 39  | 433  | 6  | 438  | 4  | 98.9  | 438        | 4  |
| MT64A-62 | 135 | 430 | 0.32 | 0.1234 | 0.0018 | 6.301  | 0.0910 | 0.3701 | 0.0037 | 2007 | 25  | 2019 | 13 | 2030 | 18 | 98.9  | 2007       | 25 |
| MT64A-63 | 144 | 246 | 0.59 | 0.0550 | 0.0015 | 0.4220 | 0.0110 | 0.0557 | 0.0006 | 411  | 57  | 357  | 8  | 349  | 4  | 102.3 | 349        | 4  |
| MT64A-64 | 433 | 674 | 0.64 | 0.0659 | 0.0011 | 1.200  | 0.0190 | 0.1320 | 0.0013 | 804  | 33  | 801  | 9  | 799  | 8  | 100.3 | 799        | 8  |
| MT64A-65 | 111 | 225 | 0.50 | 0.0532 | 0.0015 | 0.3960 | 0.0110 | 0.0539 | 0.0006 | 338  | 62  | 339  | 8  | 339  | 4  | 100.0 | 339        | 4  |
| MT64A-66 | 60  | 104 | 0.57 | 0.0578 | 0.0020 | 0.5430 | 0.0190 | 0.0682 | 0.0008 | 521  | 74  | 440  | 12 | 425  | 5  | 103.5 | 425        | 5  |



|          |     |     |      |        |        |        |        |        |        |      |     |      |    |      |    |       |            |    |
|----------|-----|-----|------|--------|--------|--------|--------|--------|--------|------|-----|------|----|------|----|-------|------------|----|
| MT64A-67 | 55  | 77  | 0.71 | 0.1634 | 0.0027 | 10.587 | 0.1700 | 0.4697 | 0.0051 | 2491 | 27  | 2488 | 15 | 2482 | 22 | 100.4 | 2491       | 27 |
| MT64A-68 | 79  | 152 | 0.52 | 0.0603 | 0.0019 | 0.6010 | 0.0180 | 0.0724 | 0.0009 | 613  | 64  | 478  | 12 | 450  | 5  | 106.2 | 450        | 5  |
| MT64A-69 | 62  | 109 | 0.57 | 0.0592 | 0.0021 | 0.6140 | 0.0220 | 0.0752 | 0.0010 | 573  | 76  | 486  | 14 | 467  | 6  | 104.1 | 467        | 6  |
| MT64A-70 | 19  | 37  | 0.51 | 0.0643 | 0.0034 | 0.6570 | 0.0340 | 0.0741 | 0.0012 | 753  | 108 | 513  | 21 | 461  | 7  | 111.3 | Discordant |    |
| MT64A-71 | 163 | 362 | 0.45 | 0.0565 | 0.0012 | 0.5790 | 0.0120 | 0.0743 | 0.0008 | 472  | 45  | 464  | 8  | 462  | 5  | 100.4 | 462        | 5  |
| MT64A-72 | 45  | 72  | 0.63 | 0.0575 | 0.0031 | 0.5480 | 0.0290 | 0.0691 | 0.0011 | 510  | 114 | 444  | 19 | 431  | 7  | 103.0 | 431        | 7  |
| MT64A-73 | 143 | 284 | 0.50 | 0.0539 | 0.0013 | 0.5490 | 0.0130 | 0.0739 | 0.0008 | 366  | 51  | 444  | 8  | 460  | 5  | 96.5  | 460        | 5  |
| MT64A-74 | 85  | 132 | 0.64 | 0.0564 | 0.0018 | 0.6000 | 0.0180 | 0.0771 | 0.0009 | 468  | 67  | 477  | 12 | 479  | 6  | 99.6  | 479        | 6  |
| MT64A-75 | 209 | 576 | 0.36 | 0.0745 | 0.0012 | 1.959  | 0.0310 | 0.1907 | 0.0020 | 1055 | 32  | 1102 | 11 | 1125 | 11 | 93.8  | 1055       | 32 |
| MT64A-76 | 123 | 267 | 0.46 | 0.0590 | 0.0016 | 0.5680 | 0.0150 | 0.0698 | 0.0008 | 567  | 56  | 457  | 9  | 435  | 5  | 105.1 | 435        | 5  |
| MT64A-77 | 108 | 224 | 0.48 | 0.0565 | 0.0015 | 0.5540 | 0.0140 | 0.0712 | 0.0008 | 471  | 55  | 448  | 9  | 443  | 5  | 101.1 | 443        | 5  |
| MT64A-78 | 42  | 98  | 0.43 | 0.1381 | 0.0024 | 8.158  | 0.1360 | 0.4285 | 0.0046 | 2203 | 29  | 2249 | 15 | 2299 | 21 | 95.8  | 2203       | 29 |
| MT64A-79 | 165 | 371 | 0.45 | 0.0568 | 0.0012 | 0.5810 | 0.0120 | 0.0742 | 0.0008 | 483  | 46  | 465  | 8  | 461  | 5  | 100.9 | 461        | 5  |
| MT64A-80 | 33  | 94  | 0.36 | 0.0588 | 0.0023 | 0.6420 | 0.0250 | 0.0792 | 0.0011 | 560  | 83  | 504  | 15 | 491  | 6  | 102.6 | 491        | 6  |
| MT64A-81 | 174 | 686 | 0.25 | 0.0570 | 0.0011 | 0.5320 | 0.0100 | 0.0676 | 0.0007 | 492  | 41  | 433  | 7  | 422  | 4  | 102.6 | 422        | 4  |

Sample T004, sandstone, Late Carboniferous Ayilihe Formation in Cedaya section of STB, (Li et al., 2014, Acta Geologica Sinica)

|         |      |      |      |  |  |  |  |  |  |  |      |     |      |    |      |    |       |            |    |
|---------|------|------|------|--|--|--|--|--|--|--|------|-----|------|----|------|----|-------|------------|----|
| T004-01 | 266  | 674  | 0.40 |  |  |  |  |  |  |  | 405  | 13  | 462  | 5  | 473  | 6  | 97.7  | 473        | 6  |
| T004-02 | 889  | 948  | 0.94 |  |  |  |  |  |  |  | 734  | 13  | 522  | 5  | 475  | 6  | 109.9 | 475        | 6  |
| T004-03 | 91   | 181  | 0.50 |  |  |  |  |  |  |  | 489  | 82  | 477  | 13 | 475  | 6  | 100.4 | 475        | 6  |
| T004-04 | 28   | 34   | 0.82 |  |  |  |  |  |  |  | 1787 | 61  | 1803 | 24 | 1818 | 23 | 98.3  | 1787       | 61 |
| T004-05 | 378  | 515  | 0.73 |  |  |  |  |  |  |  | 546  | 84  | 483  | 13 | 470  | 6  | 102.8 | 470        | 6  |
| T004-06 | 157  | 244  | 0.64 |  |  |  |  |  |  |  | 921  | 13  | 544  | 6  | 459  | 6  | 118.5 | Discordant |    |
| T004-07 | 222  | 296  | 0.75 |  |  |  |  |  |  |  | 492  | 13  | 479  | 5  | 476  | 6  | 100.6 | 476        | 6  |
| T004-08 | 147  | 281  | 0.52 |  |  |  |  |  |  |  | 859  | 65  | 497  | 11 | 422  | 6  | 117.8 | Discordant |    |
| T004-09 | 251  | 383  | 0.65 |  |  |  |  |  |  |  | 352  | 14  | 459  | 5  | 481  | 6  | 95.4  | 481        | 6  |
| T004-10 | 197  | 288  | 0.68 |  |  |  |  |  |  |  | 2284 | 10  | 2300 | 12 | 2317 | 25 | 98.6  | 2284       | 10 |
| T004-11 | 93   | 236  | 0.40 |  |  |  |  |  |  |  | 621  | 13  | 501  | 6  | 476  | 6  | 105.3 | 476        | 6  |
| T004-12 | 135  | 148  | 0.91 |  |  |  |  |  |  |  | 472  | 15  | 460  | 5  | 457  | 6  | 100.7 | 457        | 6  |
| T004-13 | 122  | 75   | 1.63 |  |  |  |  |  |  |  | 1907 | 11  | 1947 | 11 | 1984 | 22 | 96.1  | 1907       | 11 |
| T004-14 | 89   | 99   | 0.90 |  |  |  |  |  |  |  | 1961 | 10  | 1987 | 11 | 2011 | 22 | 97.5  | 1961       | 10 |
| T004-15 | 266  | 611  | 0.44 |  |  |  |  |  |  |  | 561  | 13  | 490  | 5  | 475  | 6  | 103.2 | 475        | 6  |
| T004-16 | 421  | 662  | 0.64 |  |  |  |  |  |  |  | 515  | 13  | 488  | 5  | 482  | 6  | 101.2 | 482        | 6  |
| T004-17 | 203  | 288  | 0.71 |  |  |  |  |  |  |  | 597  | 15  | 466  | 6  | 440  | 6  | 105.9 | 440        | 6  |
| T004-18 | 63   | 80   | 0.79 |  |  |  |  |  |  |  | 677  | 15  | 492  | 6  | 453  | 6  | 108.6 | 453        | 6  |
| T004-19 | 71   | 277  | 0.26 |  |  |  |  |  |  |  | 434  | 13  | 466  | 5  | 472  | 6  | 98.7  | 472        | 6  |
| T004-20 | 224  | 306  | 0.73 |  |  |  |  |  |  |  | 541  | 13  | 519  | 5  | 514  | 6  | 101.0 | 514        | 6  |
| T004-21 | 369  | 393  | 0.94 |  |  |  |  |  |  |  | 503  | 13  | 504  | 5  | 504  | 6  | 100.0 | 504        | 6  |
| T004-22 | 64   | 135  | 0.47 |  |  |  |  |  |  |  | 1833 | 11  | 1857 | 11 | 1879 | 21 | 97.6  | 1833       | 11 |
| T004-23 | 374  | 538  | 0.69 |  |  |  |  |  |  |  | 619  | 13  | 515  | 5  | 491  | 6  | 104.9 | 491        | 6  |
| T004-24 | 638  | 575  | 1.11 |  |  |  |  |  |  |  | 464  | 13  | 474  | 5  | 476  | 6  | 99.6  | 476        | 6  |
| T004-25 | 123  | 185  | 0.67 |  |  |  |  |  |  |  | 388  | 14  | 468  | 5  | 485  | 6  | 96.5  | 485        | 6  |
| T004-26 | 129  | 135  | 0.96 |  |  |  |  |  |  |  | 510  | 14  | 461  | 5  | 451  | 6  | 102.2 | 451        | 6  |
| T004-27 | 73   | 111  | 0.66 |  |  |  |  |  |  |  | 656  | 80  | 457  | 12 | 418  | 5  | 109.3 | 418        | 5  |
| T004-28 | 16   | 24   | 0.69 |  |  |  |  |  |  |  | 1868 | 11  | 1885 | 12 | 1900 | 21 | 98.3  | 1868       | 11 |
| T004-29 | 137  | 149  | 0.92 |  |  |  |  |  |  |  | 2089 | 10  | 2087 | 11 | 2085 | 22 | 100.2 | 2089       | 10 |
| T004-30 | 55   | 84   | 0.66 |  |  |  |  |  |  |  | 652  | 13  | 525  | 5  | 497  | 6  | 105.6 | 497        | 6  |
| T004-31 | 65   | 130  | 0.49 |  |  |  |  |  |  |  | 505  | 14  | 471  | 5  | 464  | 6  | 101.5 | 464        | 6  |
| T004-32 | 156  | 236  | 0.66 |  |  |  |  |  |  |  | 637  | 13  | 502  | 5  | 473  | 6  | 106.1 | 473        | 6  |
| T004-33 | 219  | 173  | 1.26 |  |  |  |  |  |  |  | 564  | 115 | 449  | 18 | 426  | 6  | 105.4 | 426        | 6  |
| T004-34 | 101  | 417  | 0.24 |  |  |  |  |  |  |  | 835  | 12  | 840  | 7  | 843  | 10 | 99.6  | 843        | 10 |
| T004-35 | 356  | 509  | 0.70 |  |  |  |  |  |  |  | 529  | 13  | 493  | 5  | 486  | 6  | 101.4 | 486        | 6  |
| T004-36 | 164  | 406  | 0.40 |  |  |  |  |  |  |  | 463  | 62  | 482  | 9  | 486  | 6  | 99.2  | 486        | 6  |
| T004-37 | 200  | 263  | 0.76 |  |  |  |  |  |  |  | 2258 | 10  | 2279 | 11 | 2302 | 24 | 98.1  | 2258       | 10 |
| T004-38 | 13   | 42   | 0.32 |  |  |  |  |  |  |  | 2408 | 10  | 2407 | 12 | 2406 | 25 | 100.1 | 2408       | 10 |
| T004-39 | 271  | 362  | 0.75 |  |  |  |  |  |  |  | 652  | 84  | 501  | 14 | 468  | 6  | 107.1 | 468        | 6  |
| T004-40 | 85   | 186  | 0.45 |  |  |  |  |  |  |  | 555  | 13  | 468  | 5  | 450  | 5  | 104.0 | 450        | 5  |
| T004-41 | 1232 | 1252 | 0.98 |  |  |  |  |  |  |  | 700  | 12  | 635  | 6  | 616  | 7  | 103.1 | 616        | 7  |
| T004-42 | 234  | 289  | 0.81 |  |  |  |  |  |  |  | 685  | 83  | 521  | 15 | 485  | 6  | 107.4 | 485        | 6  |
| T004-43 | 407  | 761  | 0.53 |  |  |  |  |  |  |  | 714  | 66  | 482  | 11 | 434  | 5  | 111.1 | Discordant |    |
| T004-44 | 166  | 454  | 0.36 |  |  |  |  |  |  |  | 2285 | 10  | 2024 | 11 | 1778 | 19 | 128.5 | Discordant |    |
| T004-45 | 58   | 145  | 0.40 |  |  |  |  |  |  |  | 2343 | 10  | 2330 | 11 | 2316 | 24 | 101.2 | 2343       | 10 |
| T004-46 | 50   | 343  | 0.14 |  |  |  |  |  |  |  | 499  | 13  | 468  | 5  | 462  | 5  | 101.3 | 462        | 5  |
| T004-47 | 251  | 399  | 0.63 |  |  |  |  |  |  |  | 546  | 13  | 478  | 5  | 464  | 5  | 103.0 | 464        | 5  |
| T004-48 | 160  | 199  | 0.80 |  |  |  |  |  |  |  | 538  | 13  | 489  | 5  | 478  | 6  | 102.3 | 478        | 6  |
| T004-49 | 41   | 1098 | 0.04 |  |  |  |  |  |  |  | 2207 | 10  | 2192 | 11 | 2175 | 23 | 101.5 | 2207       | 10 |
| T004-50 | 76   | 180  | 0.42 |  |  |  |  |  |  |  | 637  | 59  | 532  | 10 | 508  | 6  | 104.7 | 508        | 6  |
| T004-51 | 293  | 561  | 0.52 |  |  |  |  |  |  |  | 668  | 12  | 504  | 5  | 469  | 6  | 107.5 | 469        | 6  |
| T004-52 | 633  | 968  | 0.65 |  |  |  |  |  |  |  | 534  | 12  | 463  | 5  | 449  | 5  | 103.1 | 449        | 5  |
| T004-53 | 237  | 315  | 0.75 |  |  |  |  |  |  |  | 503  | 13  | 465  | 5  | 457  | 5  | 101.8 | 457        | 5  |
| T004-54 | 206  | 672  | 0.31 |  |  |  |  |  |  |  | 827  | 12  | 767  | 7  | 746  | 9  | 102.8 | 746        | 9  |
| T004-55 | 155  | 188  | 0.83 |  |  |  |  |  |  |  | 615  | 13  | 497  | 5  | 472  | 6  | 105.3 | 472        | 6  |
| T004-56 | 21   | 32   | 0.68 |  |  |  |  |  |  |  | 1869 | 11  | 1921 | 12 | 1969 | 21 | 94.9  | 1869       | 11 |
| T004-57 | 226  | 244  | 0.93 |  |  |  |  |  |  |  | 564  | 96  | 476  | 16 | 458  | 6  | 103.9 | 458        | 6  |
| T004-58 | 84   | 129  | 0.65 |  |  |  |  |  |  |  | 439  | 14  | 450  | 5  | 452  | 5  | 99.6  | 452        | 5  |
| T004-59 | 481  | 793  | 0.61 |  |  |  |  |  |  |  | 569  | 12  | 485  | 5  | 467  | 5  | 103.9 | 467        | 5  |
| T004-60 | 48   | 75   | 0.64 |  |  |  |  |  |  |  | 1797 | 10  | 1832 | 11 | 1864 | 20 | 96.4  | 1797       | 10 |
| T004-61 | 2    | 51   | 0.03 |  |  |  |  |  |  |  | 2307 | 30  | 2244 | 11 | 2176 | 22 | 106.0 | 2307       | 30 |
| T004-62 | 47   | 126  | 0.37 |  |  |  |  |  |  |  | 731  | 13  | 497  | 5  | 448  | 5  | 110.9 | Discordant |    |
| T004-63 | 57   | 110  | 0.52 |  |  |  |  |  |  |  | 521  | 84  | 453  | 13 | 439  | 6  | 103.2 | 439        | 6  |
| T004-64 | 145  | 617  | 0.23 |  |  |  |  |  |  |  | 493  | 13  | 482  | 5  | 479  | 6  | 100.6 | 479        | 6  |
| T004-65 | 217  | 284  | 0.77 |  |  |  |  |  |  |  | 1910 | 10  | 1923 | 11 | 1935 | 20 | 98.7  | 1910       | 10 |
| T004-66 | 321  | 1358 | 0.24 |  |  |  |  |  |  |  | 459  | 12  | 530  | 5  | 546  | 6  | 97.1  | 546        | 6  |
| T004-67 | 20   | 35   | 0.56 |  |  |  |  |  |  |  | 968  | 21  | 521  | 8  | 425  | 5  | 122.6 | Discordant |    |
| T004-68 | 87   | 121  | 0.71 |  |  |  |  |  |  |  | 2267 | 10  | 2295 | 11 | 2325 | 23 | 97.5  | 2267       | 10 |
| T004-69 | 39   | 61   | 0.64 |  |  |  |  |  |  |  | 544  | 15  | 470  | 6  | 455  | 5  | 103.3 | 455        | 5  |
| T004-70 | 28   | 32   | 0.89 |  |  |  |  |  |  |  | 1817 | 11  | 1766 | 12 | 1722 | 19 | 105.5 | 1817       | 11 |
| T004-71 | 359  | 373  | 0.96 |  |  |  |  |  |  |  | 846  | 12  | 478  | 5  | 404  | 5  | 118.3 | Discordant |    |
| T004-72 | 503  | 539  | 0.93 |  |  |  |  |  |  |  | 375  | 13  | 440  | 5  | 452  | 5  | 97.3  | 452        | 5  |
| T004-73 | 32   | 49   | 0.64 |  |  |  |  |  |  |  | 619  | 15  | 471  | 6  | 440  | 5  | 107.0 | 440        | 5  |
| T004-74 | 114  | 135  | 0.85 |  |  |  |  |  |  |  | 576  | 13  | 505  | 5  | 490  | 6  | 103.1 | 490        | 6  |
| T004-75 | 219  | 398  | 0.55 |  |  |  |  |  |  |  | 2264 | 10  | 2286 | 11 | 2310 | 23 | 98.0  | 2264       | 10 |
| T004-76 | 368  | 394  | 0.93 |  |  |  |  |  |  |  | 439  | 97  | 453  | 15 | 456  | 6  | 99.3  | 456        | 6  |
| T004-77 | 169  | 274  | 0.62 |  |  |  |  |  |  |  | 511  | 13  | 481  | 5  | 475  | 5  | 101.3 | 475        | 5  |
| T004-78 | 156  | 361  | 0.43 |  |  |  |  |  |  |  | 433  | 64  | 446  | 9  | 449  | 5  | 99.3  | 449        | 5  |
| T004-79 | 332  | 571  | 0.58 |  |  |  |  |  |  |  | 656  | 74  | 454  | 11 | 415  | 5  | 109.4 | 415        | 5  |
| T004-80 | 25   | 120  | 0.21 |  |  |  |  |  |  |  | 2436 | 10  | 2462 | 12 | 2492 | 25 | 97.8  | 2436       | 10 |

|          |     |      |      |        |        |        |        |        |        |      |     |      |    |      |    |       |            |    |
|----------|-----|------|------|--------|--------|--------|--------|--------|--------|------|-----|------|----|------|----|-------|------------|----|
| LT37A-21 | 18  | 50   | 0.36 | 0.0538 | 0.0034 | 0.5710 | 0.0360 | 0.0770 | 0.0013 | 364  | 141 | 459  | 23 | 478  | 8  | 96.0  | 478        | 8  |
| LT37A-22 | 157 | 270  | 0.58 | 0.0574 | 0.0014 | 0.5730 | 0.0130 | 0.0724 | 0.0008 | 507  | 51  | 460  | 9  | 451  | 5  | 102.0 | 451        | 5  |
| LT37A-23 | 39  | 166  | 0.23 | 0.0557 | 0.0018 | 0.5370 | 0.0170 | 0.0700 | 0.0008 | 439  | 70  | 437  | 11 | 436  | 5  | 100.2 | 436        | 5  |
| LT37A-24 | 75  | 137  | 0.55 | 0.0574 | 0.0018 | 0.5570 | 0.0170 | 0.0704 | 0.0008 | 507  | 67  | 450  | 11 | 438  | 5  | 102.7 | 438        | 5  |
| LT37A-25 | 34  | 126  | 0.27 | 0.0559 | 0.0018 | 0.5580 | 0.0170 | 0.0724 | 0.0009 | 446  | 70  | 450  | 11 | 451  | 5  | 99.8  | 451        | 5  |
| LT37A-26 | 122 | 144  | 0.85 | 0.0551 | 0.0017 | 0.5260 | 0.0160 | 0.0692 | 0.0008 | 417  | 69  | 429  | 11 | 431  | 5  | 99.5  | 431        | 5  |
| LT37A-27 | 150 | 195  | 0.77 | 0.0542 | 0.0015 | 0.5320 | 0.0140 | 0.0712 | 0.0008 | 379  | 62  | 433  | 10 | 443  | 5  | 97.7  | 443        | 5  |
| LT37A-28 | 162 | 280  | 0.58 | 0.0541 | 0.0013 | 0.5270 | 0.0120 | 0.0707 | 0.0008 | 373  | 54  | 430  | 8  | 440  | 5  | 97.7  | 440        | 5  |
| LT37A-29 | 254 | 378  | 0.67 | 0.0711 | 0.0013 | 1.418  | 0.0250 | 0.1446 | 0.0015 | 960  | 36  | 896  | 10 | 871  | 8  | 102.9 | 871        | 8  |
| LT37A-30 | 101 | 191  | 0.53 | 0.0557 | 0.0016 | 0.5460 | 0.0150 | 0.0711 | 0.0008 | 441  | 61  | 442  | 10 | 443  | 5  | 99.8  | 443        | 5  |
| LT37A-31 | 94  | 89   | 1.06 | 0.0689 | 0.0019 | 1.256  | 0.0330 | 0.1322 | 0.0016 | 897  | 56  | 826  | 15 | 800  | 9  | 103.3 | 800        | 9  |
| LT37A-32 | 114 | 86   | 1.33 | 0.0518 | 0.0022 | 0.5380 | 0.0220 | 0.0754 | 0.0010 | 275  | 93  | 437  | 14 | 469  | 6  | 93.2  | 469        | 6  |
| LT37A-33 | 95  | 161  | 0.59 | 0.0550 | 0.0016 | 0.5580 | 0.0160 | 0.0737 | 0.0009 | 411  | 65  | 450  | 11 | 458  | 5  | 98.3  | 458        | 5  |
| LT37A-34 | 108 | 170  | 0.64 | 0.0678 | 0.0014 | 1.407  | 0.0290 | 0.1506 | 0.0016 | 861  | 43  | 892  | 12 | 904  | 9  | 98.7  | 904        | 9  |
| LT37A-35 | 369 | 257  | 1.43 | 0.0964 | 0.0031 | 3.078  | 0.1270 | 0.2316 | 0.0032 | 1555 | 59  | 1427 | 32 | 1343 | 17 | 115.8 | Discordant |    |
| LT37A-36 | 118 | 202  | 0.58 | 0.0551 | 0.0015 | 0.5440 | 0.0140 | 0.0716 | 0.0008 | 415  | 59  | 441  | 9  | 446  | 5  | 98.9  | 446        | 5  |
| LT37A-37 | 227 | 459  | 0.49 | 0.0617 | 0.0059 | 0.6320 | 0.0640 | 0.0742 | 0.0011 | 664  | 203 | 497  | 40 | 462  | 6  | 107.6 | 462        | 6  |
| LT37A-38 | 282 | 268  | 1.05 | 0.0667 | 0.0013 | 1.162  | 0.0230 | 0.1263 | 0.0013 | 830  | 41  | 783  | 11 | 767  | 8  | 102.1 | 767        | 8  |
| LT37A-39 | 50  | 205  | 0.24 | 0.0588 | 0.0018 | 0.6020 | 0.0170 | 0.0742 | 0.0009 | 561  | 64  | 479  | 11 | 462  | 5  | 103.7 | 462        | 5  |
| LT37A-40 | 127 | 195  | 0.65 | 0.0547 | 0.0015 | 0.5620 | 0.0150 | 0.0745 | 0.0008 | 400  | 61  | 453  | 10 | 463  | 5  | 97.8  | 463        | 5  |
| LT37A-41 | 159 | 194  | 0.82 | 0.0559 | 0.0016 | 0.5580 | 0.0150 | 0.0724 | 0.0008 | 449  | 61  | 450  | 10 | 451  | 5  | 99.8  | 451        | 5  |
| LT37A-42 | 131 | 202  | 0.65 | 0.0553 | 0.0015 | 0.5530 | 0.0150 | 0.0725 | 0.0008 | 424  | 59  | 447  | 10 | 451  | 5  | 99.1  | 451        | 5  |
| LT37A-43 | 21  | 32   | 0.66 | 0.1180 | 0.0028 | 5.580  | 0.1310 | 0.3429 | 0.0043 | 1926 | 42  | 1913 | 20 | 1900 | 21 | 101.4 | 1926       | 42 |
| LT37A-44 | 240 | 430  | 0.56 | 0.1575 | 0.0025 | 9.828  | 0.1520 | 0.4524 | 0.0046 | 2429 | 27  | 2419 | 14 | 2406 | 20 | 101.0 | 2429       | 27 |
| LT37A-45 | 228 | 354  | 0.64 | 0.0575 | 0.0013 | 0.5910 | 0.0130 | 0.0745 | 0.0008 | 510  | 48  | 471  | 8  | 463  | 5  | 101.7 | 463        | 5  |
| LT37A-46 | 137 | 478  | 0.29 | 0.1205 | 0.0020 | 6.208  | 0.0970 | 0.3736 | 0.0038 | 1964 | 28  | 2006 | 14 | 2046 | 18 | 96.0  | 1964       | 28 |
| LT37A-47 | 268 | 477  | 0.56 | 0.0613 | 0.0013 | 0.6190 | 0.0120 | 0.0732 | 0.0008 | 650  | 43  | 489  | 8  | 456  | 5  | 107.2 | 456        | 5  |
| LT37A-48 | 88  | 202  | 0.43 | 0.0569 | 0.0017 | 0.5640 | 0.0190 | 0.0719 | 0.0009 | 487  | 62  | 454  | 12 | 448  | 5  | 101.3 | 448        | 5  |
| LT37A-49 | 54  | 114  | 0.47 | 0.0576 | 0.0019 | 0.5830 | 0.0190 | 0.0734 | 0.0009 | 515  | 69  | 466  | 12 | 456  | 5  | 102.2 | 456        | 5  |
| LT37A-50 | 157 | 332  | 0.47 | 0.0601 | 0.0016 | 0.5770 | 0.0180 | 0.0696 | 0.0008 | 608  | 54  | 462  | 12 | 434  | 5  | 106.5 | 434        | 5  |
| LT37A-51 | 213 | 382  | 0.56 | 0.0544 | 0.0012 | 0.5400 | 0.0120 | 0.0720 | 0.0008 | 388  | 48  | 439  | 8  | 448  | 5  | 98.0  | 448        | 5  |
| LT37A-52 | 133 | 157  | 0.85 | 0.0618 | 0.0016 | 0.9080 | 0.0230 | 0.1065 | 0.0012 | 668  | 51  | 656  | 12 | 652  | 7  | 100.6 | 652        | 7  |
| LT37A-53 | 207 | 432  | 0.48 | 0.0573 | 0.0013 | 0.5700 | 0.0120 | 0.0721 | 0.0008 | 505  | 45  | 458  | 8  | 449  | 5  | 102.0 | 449        | 5  |
| LT37A-54 | 128 | 173  | 0.74 | 0.0557 | 0.0017 | 0.5320 | 0.0150 | 0.0693 | 0.0008 | 439  | 63  | 433  | 10 | 432  | 5  | 100.2 | 432        | 5  |
| LT37A-55 | 210 | 309  | 0.68 | 0.0580 | 0.0014 | 0.5710 | 0.0130 | 0.0713 | 0.0008 | 531  | 49  | 458  | 9  | 444  | 5  | 103.2 | 444        | 5  |
| LT37A-56 | 296 | 610  | 0.48 | 0.0667 | 0.0012 | 1.264  | 0.0220 | 0.1375 | 0.0014 | 828  | 36  | 830  | 10 | 831  | 8  | 99.9  | 831        | 8  |
| LT37A-57 | 284 | 404  | 0.70 | 0.0560 | 0.0013 | 0.5420 | 0.0120 | 0.0701 | 0.0008 | 453  | 47  | 439  | 8  | 437  | 5  | 100.5 | 437        | 5  |
| LT37A-58 | 86  | 104  | 0.83 | 0.1118 | 0.0022 | 5.256  | 0.0990 | 0.3408 | 0.0037 | 1830 | 33  | 1862 | 16 | 1890 | 18 | 96.8  | 1830       | 33 |
| LT37A-59 | 139 | 258  | 0.54 | 0.0566 | 0.0014 | 0.5680 | 0.0140 | 0.0727 | 0.0008 | 476  | 53  | 456  | 9  | 453  | 5  | 100.7 | 453        | 5  |
| LT37A-60 | 137 | 244  | 0.56 | 0.0589 | 0.0015 | 0.5910 | 0.0150 | 0.0728 | 0.0008 | 564  | 53  | 472  | 9  | 453  | 5  | 104.2 | 453        | 5  |
| LT37A-61 | 336 | 1146 | 0.29 | 0.1200 | 0.0048 | 3.311  | 0.1460 | 0.2000 | 0.0025 | 1957 | 68  | 1484 | 34 | 1175 | 13 | 166.6 | Discordant |    |
| LT37A-62 | 142 | 202  | 0.70 | 0.0681 | 0.0015 | 1.420  | 0.0300 | 0.1512 | 0.0017 | 871  | 43  | 897  | 13 | 908  | 9  | 98.8  | 908        | 9  |
| LT37A-63 | 67  | 127  | 0.52 | 0.1714 | 0.0032 | 11.685 | 0.2130 | 0.4944 | 0.0055 | 2571 | 30  | 2580 | 17 | 2590 | 24 | 99.3  | 2571       | 30 |
| LT37A-64 | 328 | 448  | 0.73 | 0.0561 | 0.0013 | 0.5420 | 0.0120 | 0.0700 | 0.0008 | 458  | 47  | 440  | 8  | 436  | 5  | 100.9 | 436        | 5  |
| LT37A-65 | 73  | 185  | 0.39 | 0.0572 | 0.0016 | 0.5760 | 0.0160 | 0.0732 | 0.0009 | 497  | 59  | 462  | 10 | 455  | 5  | 101.5 | 455        | 5  |
| LT37A-66 | 75  | 105  | 0.72 | 0.0592 | 0.0021 | 0.5680 | 0.0200 | 0.0696 | 0.0009 | 574  | 74  | 457  | 13 | 434  | 5  | 105.3 | 434        | 5  |
| LT37A-67 | 54  | 83   | 0.65 | 0.0582 | 0.0027 | 0.5640 | 0.0250 | 0.0704 | 0.0010 | 536  | 95  | 454  | 16 | 438  | 6  | 103.7 | 438        | 6  |
| LT37A-68 | 116 | 203  | 0.57 | 0.0549 | 0.0015 | 0.5390 | 0.0150 | 0.0713 | 0.0008 | 407  | 59  | 438  | 10 | 444  | 5  | 98.6  | 444        | 5  |
| LT37A-69 | 153 | 294  | 0.52 | 0.0567 | 0.0014 | 0.5580 | 0.0140 | 0.0714 | 0.0008 | 480  | 52  | 450  | 9  | 445  | 5  | 101.1 | 445        | 5  |
| LT37A-70 | 153 | 382  | 0.40 | 0.1165 | 0.0021 | 5.686  | 0.1010 | 0.3540 | 0.0037 | 1903 | 31  | 1929 | 15 | 1954 | 18 | 97.4  | 1903       | 31 |
| LT37A-71 | 95  | 136  | 0.70 | 0.0678 | 0.0017 | 1.373  | 0.0330 | 0.1468 | 0.0017 | 864  | 48  | 878  | 14 | 883  | 9  | 99.4  | 883        | 9  |
| LT37A-72 | 241 | 310  | 0.78 | 0.0571 | 0.0018 | 0.5890 | 0.0180 | 0.0748 | 0.0009 | 495  | 64  | 470  | 11 | 465  | 5  | 101.1 | 465        | 5  |
| LT37A-73 | 98  | 185  | 0.53 | 0.0559 | 0.0016 | 0.5680 | 0.0160 | 0.0738 | 0.0009 | 447  | 61  | 457  | 10 | 459  | 5  | 99.6  | 459        | 5  |
| LT37A-74 | 149 | 243  | 0.61 | 0.0545 | 0.0015 | 0.5300 | 0.0140 | 0.0706 | 0.0008 | 391  | 58  | 432  | 9  | 440  | 5  | 98.2  | 440        | 5  |
| LT37A-75 | 66  | 371  | 0.18 | 0.0565 | 0.0013 | 0.5940 | 0.0140 | 0.0762 | 0.0009 | 474  | 50  | 474  | 9  | 473  | 5  | 100.2 | 473        | 5  |
| LT37A-76 | 65  | 175  | 0.37 | 0.0545 | 0.0017 | 0.5460 | 0.0160 | 0.0726 | 0.0009 | 391  | 64  | 442  | 11 | 452  | 5  | 97.8  | 452        | 5  |
| LT37A-77 | 44  | 333  | 0.13 | 0.0613 | 0.0014 | 0.9080 | 0.0200 | 0.1073 | 0.0012 | 650  | 46  | 656  | 11 | 657  | 7  | 99.8  | 657        | 7  |
| LT37A-78 | 109 | 202  | 0.54 | 0.0574 | 0.0016 | 0.5940 | 0.0160 | 0.0751 | 0.0009 | 509  | 58  | 474  | 10 | 467  | 5  | 101.5 | 467        | 5  |
| LT37A-79 | 85  | 177  | 0.48 | 0.0565 | 0.0017 | 0.5580 | 0.0160 | 0.0716 | 0.0009 | 471  | 63  | 450  | 11 | 446  | 5  | 100.9 | 446        | 5  |
| LT37A-80 | 246 | 421  | 0.58 | 0.0549 | 0.0013 | 0.5550 | 0.0130 | 0.0734 | 0.0008 | 407  | 50  | 448  | 8  | 457  | 5  | 98.0  | 457        | 5  |
| LT37A-81 | 149 | 290  | 0.52 | 0.0549 | 0.0014 | 0.5570 | 0.0140 | 0.0735 | 0.0008 | 407  | 55  | 449  | 9  | 457  | 5  | 98.2  | 457        | 5  |
| LT37A-82 | 130 | 299  | 0.44 | 0.0551 | 0.0014 | 0.5540 | 0.0140 | 0.0729 | 0.0008 | 417  | 54  | 447  | 9  | 453  | 5  | 98.7  | 453        | 5  |
| LT37A-83 | 81  | 106  | 0.76 | 0.0670 | 0.0018 | 1.286  | 0.0340 | 0.1392 | 0.0017 | 838  | 53  | 839  | 15 | 840  | 9  | 99.9  | 840        | 9  |
| LT37A-84 | 115 | 196  | 0.59 | 0.0543 | 0.0016 | 0.5380 | 0.0160 | 0.0720 | 0.0009 | 382  | 63  | 437  | 10 | 448  | 5  | 97.5  | 448        | 5  |
| LT37A-85 | 132 | 263  | 0.50 | 0.0548 | 0.0015 | 0.5490 | 0.0150 | 0.0726 | 0.0008 | 404  | 58  | 444  | 10 | 452  | 5  | 98.2  | 452        | 5  |
| LT37A-86 | 90  | 123  | 0.73 | 0.0576 | 0.0020 | 0.5710 | 0.0200 | 0.0718 | 0.0009 | 516  | 72  | 459  | 13 | 447  | 5  | 102.7 | 447        | 5  |
| LT37A-87 | 133 | 238  | 0.56 | 0.0552 | 0.0015 | 0.5450 | 0.0150 | 0.0715 | 0.0008 | 420  | 59  | 441  | 10 | 445  | 5  | 99.1  | 445        | 5  |
| LT37A-88 | 54  | 133  | 0.41 | 0.0600 | 0.0017 | 0.9500 | 0.0260 | 0.1148 | 0.0014 | 604  | 58  | 678  | 14 | 701  | 8  | 96.7  | 701        | 8  |

Sample LT07A, feldspathic wacke, Early Carboniferous Yeyungou Formation along the Kule-Bayinbulake highway of STB, (Han et al., 2016, Geology)

|          |     |     |      |        |        |        |        |        |        |      |     |      |    |      |    |       |            |    |
|----------|-----|-----|------|--------|--------|--------|--------|--------|--------|------|-----|------|----|------|----|-------|------------|----|
| LT07A-01 | 62  | 169 | 0.36 | 0.0553 | 0.0017 | 0.4990 | 0.0150 | 0.0655 | 0.0008 | 423  | 66  | 411  | 10 | 409  | 5  | 100.5 | 409        | 5  |
| LT07A-02 | 93  | 205 | 0.45 | 0.0559 | 0.0015 | 0.5020 | 0.0130 | 0.0651 | 0.0007 | 450  | 59  | 413  | 9  | 407  | 4  | 101.5 | 407        | 4  |
| LT07A-03 | 78  | 105 | 0.74 | 0.0575 | 0.0021 | 0.5130 | 0.0180 | 0.0647 | 0.0008 | 509  | 79  | 420  | 12 | 404  | 5  | 104.0 | 404        | 5  |
| LT07A-04 | 57  | 120 | 0.48 | 0.0591 | 0.0019 | 0.5760 | 0.0180 | 0.0708 | 0.0008 | 569  | 69  | 462  | 12 | 441  | 5  | 104.8 | 441        | 5  |
| LT07A-05 | 248 | 562 | 0.44 | 0.0578 | 0.0011 | 0.5340 | 0.0100 | 0.0671 | 0.0007 | 521  | 42  | 435  | 7  | 418  | 4  | 104.1 | 418        | 4  |
| LT07A-06 | 308 | 280 | 1.10 | 0.0559 | 0.0013 | 0.5180 | 0.0120 | 0.0673 | 0.0007 | 447  | 52  | 424  | 8  | 420  | 4  | 101.0 | 420        | 4  |
| LT07A-07 | 45  | 76  | 0.59 | 0.0589 | 0.0023 | 0.5590 | 0.0220 | 0.0687 | 0.0009 | 565  | 85  | 451  | 14 | 429  | 5  | 105.1 | 429        | 5  |
| LT07A-08 | 35  | 283 | 0.12 | 0.0693 | 0.0013 | 1.361  | 0.0250 | 0.1425 | 0.0015 | 907  | 38  | 872  | 11 | 859  | 8  | 101.5 | 859        | 8  |
| LT07A-09 | 39  | 69  | 0.57 | 0.0621 | 0.0029 | 0.5540 | 0.0250 | 0.0646 | 0.0009 | 678  | 97  | 447  | 16 | 404  | 5  | 110.6 | Discordant |    |
| LT07A-10 | 139 | 287 | 0.49 | 0.0549 | 0.0014 | 0.4710 | 0.0110 | 0.0623 | 0.0007 | 407  | 55  | 392  | 8  | 389  | 4  | 100.8 | 389        | 4  |
| LT07A-11 | 50  | 116 | 0.43 | 0.0593 | 0.0019 | 0.5960 | 0.0190 | 0.0730 | 0.0009 | 576  | 68  | 475  | 12 | 454  | 5  | 104.6 | 454        | 5  |
| LT07A-12 | 61  | 130 | 0.46 | 0.0555 | 0.0019 | 0.5040 | 0.0170 | 0.0658 | 0.0008 | 432  | 74  | 414  | 11 | 411  | 5  | 100.7 | 411        | 5  |
| LT07A-13 | 93  | 172 | 0.54 | 0.0535 | 0.0016 | 0.4750 | 0.0140 | 0.0644 | 0.0007 | 351  | 66  | 395  | 9  | 402  | 4  | 98.3  | 402        | 4  |
| LT07A-14 | 185 | 194 | 0.95 | 0.0666 | 0.0019 | 1.175  | 0.0330 | 0.1280 | 0.0015 | 825  | 59  | 789  | 15 | 776  | 9  | 101.7 | 776        | 9  |
| LT07A-15 | 114 | 197 | 0.58 | 0.0565 | 0.0015 | 0.5400 | 0.0140 | 0.0694 | 0.0008 | 471  | 59  | 438  | 9  | 432  | 5  | 101.4 | 432        | 5  |
| LT07A-16 | 106 | 110 | 0.97 | 0.0987 | 0.0019 | 3.508  | 0.0660 | 0.2578 | 0.0028 | 1600 | 36  | 1529 | 15 | 1479 | 14 | 108.2 | 1600       | 36 |
| LT07A-17 | 290 | 708 | 0.41 | 0.0578 | 0.0011 | 0.5420 | 0.0100 | 0.0681 | 0.0007 | 521  | 42  | 440  | 7  | 425  | 4  | 103.5 | 425        | 4  |
| LT07A-18 | 343 | 489 | 0.70 | 0.0562 | 0.0012 | 0.5450 | 0.0110 | 0.0704 | 0.0007 | 459  | 45  | 442  | 7  | 439  | 4  | 100.7 | 439        | 4  |
| LT07A-19 | 51  | 101 | 0.51 | 0.0548 | 0.0021 | 0.5090 | 0.0190 | 0.0674 | 0.0008 | 402  | 84  | 418  | 13 | 421  | 5  | 99.3  | 421        | 5  |
| LT07A-20 | 159 | 409 | 0.39 | 0.0556 | 0.0012 | 0.5200 | 0.0110 | 0.0678 | 0.0007 | 438  | 48  | 425  | 7  | 423  | 4  | 100.5 | 423        | 4  |
| LT07A-21 | 82  | 162 | 0.50 | 0.0574 | 0.0016 | 0.5630 | 0.0160 | 0.0712 | 0.0008 | 506  | 62  | 453  | 10 | 443  | 5  | 102.3 | 443        | 5  |
| LT07A-22 | 273 | 273 | 1.00 | 0.0555 | 0.0013 | 0.5440 | 0.0130 | 0.0711 | 0.0008 | 432  | 53  | 441  | 8  | 442  | 5  | 99.8  | 442        | 5  |
| LT07A-23 | 188 | 211 | 0.89 | 0.0547 | 0.0015 | 0.5170 | 0.0140 | 0.0685 | 0.0008 | 402  | 60  | 423  | 9  | 427  | 5  | 99.1  | 427        | 5  |
| LT07A-24 | 52  | 119 | 0.43 | 0.0562 | 0.0023 | 0.4920 | 0.0200 | 0.0635 | 0.0008 | 460  | 89  | 406  | 13 | 397  | 5  | 102.3 | 397        | 5  |
| LT07A-25 | 276 | 365 | 0.76 | 0.0575 | 0.0013 | 0.5510 | 0.0120 | 0.0696 | 0.0008 | 509  | 49  | 446  | 8  | 434  | 5  | 102.8 | 434        | 5  |
| LT07A-26 | 136 | 272 | 0.50 | 0.0563 | 0.0014 | 0.4980 | 0.0120 | 0.0641 | 0.0007 | 464  | 55  | 410  | 8  | 401  | 4  | 102.2 | 401        | 4  |
| LT07A-27 | 88  | 148 | 0.59 | 0.0582 | 0.0017 | 0.5650 | 0.0160 | 0.0703 | 0.0008 | 539  | 64  | 455  | 11 | 438  | 5  | 103.9 | 438        | 5  |
| LT07A-28 | 27  | 51  | 0.53 | 0.0566 | 0.0030 | 0.5160 | 0.0270 | 0.0661 | 0.0010 | 475  | 115 | 422  | 18 | 413  | 6  | 102.2 | 413        | 6  |
| LT07A-29 | 129 | 174 | 0.74 | 0.0573 | 0.0020 | 0.5690 | 0.0240 | 0.0721 | 0.0009 | 502  | 76  | 457  | 15 | 448  | 6  | 102.0 | 448        | 6  |
| LT07A-30 | 142 | 189 | 0.75 | 0.0543 | 0.0016 | 0.5190 | 0.0150 | 0.0694 | 0.0008 | 382  | 64  | 425  | 10 | 433  | 5  | 98.2  | 433        | 5  |
| LT07A-31 | 60  | 110 | 0.55 | 0.0565 | 0.0021 | 0.5790 | 0.0210 | 0.0743 | 0.0010 | 473  | 83  | 464  | 14 | 462  | 6  | 100.4 | 462        | 6  |
| LT07A-32 | 83  | 144 | 0.58 | 0.0581 | 0.0019 | 0.5390 | 0.0170 | 0.0673 | 0.0008 | 535  | 69  | 438  | 11 | 420  | 5  | 104.3 | 420        | 5  |
| LT07A-33 | 167 | 190 | 0.88 | 0.0557 | 0.0017 | 0.4800 | 0.0140 | 0.0625 | 0.0007 | 439  | 67  | 398  | 10 | 391  | 4  | 101.8 | 391        | 4  |
| LT07A-34 | 31  | 60  | 0.51 | 0.0585 | 0.0038 | 0.3380 | 0.0210 | 0.0419 | 0.0007 | 548  | 139 | 296  | 16 | 265  | 4  | 111.7 | Discordant |    |
| LT07A-35 | 73  | 139 | 0.53 | 0.0592 | 0.0020 | 0.5300 | 0.0180 | 0.0650 | 0.0008 | 573  | 72  | 432  | 12 | 406  | 5  | 106.4 | 406        | 5  |
| LT07A-36 | 95  | 242 | 0.39 | 0.0568 | 0.0015 | 0.5840 | 0.0140 | 0.0746 | 0.0008 | 483  | 55  | 467  | 9  | 464  | 5  | 100.6 | 464        | 5  |
| LT07A-37 | 131 | 252 | 0.52 | 0.0588 | 0.0015 | 0.5550 | 0.0140 | 0.0685 | 0.0008 | 558  | 55  | 448  | 9  | 427  | 5  | 104.9 | 427        | 5  |
| LT07A-38 | 109 | 252 | 0.43 | 0.0585 | 0.0015 | 0.5060 | 0.0130 | 0.0628 | 0.0007 | 547  | 56  | 416  | 9  | 392  | 4  | 106.1 | 392        | 4  |
| LT07A-39 | 167 | 584 | 0.29 | 0.0561 | 0.0012 | 0.5270 | 0.0110 | 0.0681 | 0.0007 | 458  | 45  | 430  | 7  | 425  | 4  | 101.2 | 425        | 4  |
| LT07A-40 | 117 | 176 | 0.66 | 0.0553 | 0.0016 | 0.5390 | 0.0150 | 0.0707 | 0.0008 | 423  | 63  | 438  | 10 | 440  | 5  | 99.5  | 440        | 5  |
| LT07A-41 | 67  | 164 | 0.41 | 0.1237 | 0.0024 | 5.781  | 0.1080 | 0.3391 | 0.0037 | 2010 | 33  | 1944 | 16 | 1882 | 18 | 106.8 | 2010       | 33 |
| LT07A-42 | 350 | 463 | 0.76 | 0.0586 | 0.0013 | 0.5730 | 0.0120 | 0.0709 | 0.0008 | 553  | 47  | 460  | 8  | 442  | 5  | 104.1 | 442        | 5  |
| LT07A-43 | 147 | 178 | 0.82 | 0.0565 | 0.0017 | 0.5140 | 0.0150 | 0.0661 | 0.0008 | 470  | 64  | 421  | 10 | 413  | 5  | 101.9 | 413        | 5  |
| LT07A-44 | 95  | 197 | 0.48 | 0.0578 | 0.0017 | 0.5160 | 0.0150 | 0.0646 | 0.0008 | 524  | 62  | 422  | 10 | 404  | 5  | 104.5 | 404        | 5  |
| LT07A-45 | 250 | 319 | 0.78 | 0.0571 | 0.0014 | 0.5530 | 0.0130 | 0.0703 | 0.0008 | 495  | 53  | 447  | 9  | 438  | 5  | 102.1 | 438        | 5  |
| LT07A-46 | 475 | 493 | 0.96 | 0.0566 | 0.0013 | 0.5470 | 0.0120 | 0.0702 | 0.0008 | 474  | 48  | 443  | 8  | 437  | 5  | 101.4 | 437        | 5  |
| LT07A-47 | 70  | 199 | 0.35 | 0.0565 | 0.0017 | 0.5240 | 0.0180 | 0.0672 | 0.0008 | 473  | 66  | 428  | 12 | 419  | 5  | 102.1 | 419        | 5  |
| LT07A-48 | 107 | 220 | 0.49 | 0.0587 | 0.0016 | 0.5360 | 0.0140 | 0.0662 | 0.0008 | 555  | 58  | 436  | 10 | 413  | 5  | 105.6 | 413        | 5  |
| LT07A-49 | 212 | 303 | 0.70 | 0.0555 | 0.0015 | 0.5200 | 0.0140 | 0.0679 | 0.0008 | 434  | 58  | 425  | 9  | 424  | 5  | 100.2 | 424        | 5  |

|          |     |     |      |        |        |        |        |        |        |      |     |      |    |      |    |       |      |    |
|----------|-----|-----|------|--------|--------|--------|--------|--------|--------|------|-----|------|----|------|----|-------|------|----|
| LT07A-50 | 91  | 229 | 0.40 | 0.0688 | 0.0015 | 1.348  | 0.0290 | 0.1421 | 0.0016 | 894  | 45  | 867  | 13 | 856  | 9  | 101.3 | 856  | 9  |
| LT07A-51 | 222 | 287 | 0.77 | 0.0764 | 0.0016 | 1.645  | 0.0340 | 0.1561 | 0.0017 | 1106 | 41  | 988  | 13 | 935  | 10 | 105.7 | 935  | 10 |
| LT07A-52 | 64  | 106 | 0.61 | 0.0590 | 0.0024 | 0.5690 | 0.0220 | 0.0699 | 0.0009 | 567  | 85  | 457  | 14 | 436  | 6  | 104.8 | 436  | 6  |
| LT07A-53 | 118 | 248 | 0.47 | 0.0544 | 0.0015 | 0.4920 | 0.0140 | 0.0657 | 0.0008 | 387  | 62  | 406  | 9  | 410  | 5  | 99.0  | 410  | 5  |
| LT07A-54 | 42  | 87  | 0.48 | 0.0554 | 0.0021 | 0.5740 | 0.0210 | 0.0752 | 0.0010 | 428  | 82  | 461  | 14 | 467  | 6  | 98.7  | 467  | 6  |
| LT07A-55 | 72  | 180 | 0.40 | 0.0566 | 0.0017 | 0.5040 | 0.0150 | 0.0646 | 0.0008 | 474  | 65  | 414  | 10 | 404  | 5  | 102.5 | 404  | 5  |
| LT07A-56 | 189 | 300 | 0.63 | 0.0548 | 0.0014 | 0.5470 | 0.0140 | 0.0724 | 0.0008 | 405  | 55  | 443  | 9  | 450  | 5  | 98.4  | 450  | 5  |
| LT07A-57 | 140 | 312 | 0.45 | 0.0562 | 0.0014 | 0.5380 | 0.0130 | 0.0694 | 0.0008 | 460  | 55  | 437  | 9  | 433  | 5  | 100.9 | 433  | 5  |
| LT07A-58 | 218 | 241 | 0.91 | 0.0551 | 0.0015 | 0.5200 | 0.0140 | 0.0685 | 0.0008 | 417  | 59  | 425  | 9  | 427  | 5  | 99.5  | 427  | 5  |
| LT07A-59 | 145 | 202 | 0.72 | 0.0566 | 0.0016 | 0.5420 | 0.0150 | 0.0694 | 0.0008 | 476  | 62  | 439  | 10 | 433  | 5  | 101.4 | 433  | 5  |
| LT07A-60 | 274 | 402 | 0.68 | 0.0559 | 0.0014 | 0.5600 | 0.0130 | 0.0728 | 0.0008 | 446  | 52  | 452  | 9  | 453  | 5  | 99.8  | 453  | 5  |
| LT07A-61 | 88  | 137 | 0.64 | 0.0528 | 0.0022 | 0.5130 | 0.0210 | 0.0704 | 0.0010 | 321  | 92  | 420  | 14 | 439  | 6  | 95.7  | 439  | 6  |
| LT07A-62 | 191 | 394 | 0.48 | 0.0578 | 0.0015 | 0.5770 | 0.0140 | 0.0724 | 0.0008 | 523  | 54  | 463  | 9  | 451  | 5  | 102.7 | 451  | 5  |
| LT07A-63 | 40  | 118 | 0.34 | 0.1066 | 0.0024 | 4.430  | 0.0990 | 0.3015 | 0.0035 | 1742 | 40  | 1718 | 18 | 1699 | 17 | 102.5 | 1742 | 40 |
| LT07A-64 | 211 | 313 | 0.67 | 0.0577 | 0.0015 | 0.5560 | 0.0140 | 0.0700 | 0.0008 | 517  | 55  | 449  | 9  | 436  | 5  | 103.0 | 436  | 5  |
| LT07A-65 | 334 | 440 | 0.76 | 0.0544 | 0.0013 | 0.5430 | 0.0130 | 0.0723 | 0.0008 | 389  | 53  | 440  | 9  | 450  | 5  | 97.8  | 450  | 5  |
| LT07A-66 | 26  | 44  | 0.60 | 0.0594 | 0.0033 | 0.5540 | 0.0300 | 0.0675 | 0.0010 | 583  | 117 | 447  | 20 | 421  | 6  | 106.2 | 421  | 6  |
| LT07A-67 | 109 | 197 | 0.55 | 0.0586 | 0.0017 | 0.6410 | 0.0180 | 0.0794 | 0.0010 | 551  | 61  | 503  | 11 | 492  | 6  | 102.2 | 492  | 6  |
| LT07A-68 | 151 | 607 | 0.25 | 0.0570 | 0.0014 | 0.5470 | 0.0130 | 0.0696 | 0.0008 | 491  | 51  | 443  | 8  | 434  | 5  | 102.1 | 434  | 5  |
| LT07A-69 | 165 | 187 | 0.88 | 0.0580 | 0.0017 | 0.5800 | 0.0170 | 0.0725 | 0.0009 | 530  | 64  | 464  | 11 | 451  | 5  | 102.9 | 451  | 5  |
| LT07A-70 | 65  | 169 | 0.38 | 0.0557 | 0.0019 | 0.5460 | 0.0180 | 0.0710 | 0.0009 | 442  | 72  | 442  | 12 | 442  | 5  | 100.0 | 442  | 5  |
| LT07A-71 | 86  | 193 | 0.44 | 0.0547 | 0.0017 | 0.4970 | 0.0150 | 0.0658 | 0.0008 | 400  | 66  | 409  | 10 | 411  | 5  | 99.5  | 411  | 5  |
| LT07A-72 | 129 | 247 | 0.52 | 0.0557 | 0.0016 | 0.5230 | 0.0150 | 0.0682 | 0.0008 | 440  | 62  | 427  | 10 | 425  | 5  | 100.5 | 425  | 5  |
| LT07A-73 | 140 | 217 | 0.65 | 0.0592 | 0.0017 | 0.6100 | 0.0170 | 0.0748 | 0.0009 | 576  | 61  | 484  | 11 | 465  | 5  | 104.1 | 465  | 5  |
| LT07A-74 | 195 | 349 | 0.56 | 0.0570 | 0.0015 | 0.5420 | 0.0140 | 0.0690 | 0.0008 | 490  | 57  | 439  | 9  | 430  | 5  | 102.1 | 430  | 5  |
| LT07A-75 | 114 | 178 | 0.64 | 0.0662 | 0.0017 | 1.233  | 0.0320 | 0.1352 | 0.0016 | 811  | 53  | 816  | 14 | 818  | 9  | 99.8  | 818  | 9  |
| LT07A-76 | 69  | 168 | 0.41 | 0.0565 | 0.0021 | 0.5600 | 0.0200 | 0.0719 | 0.0010 | 472  | 79  | 452  | 13 | 448  | 6  | 100.9 | 448  | 6  |
| LT07A-77 | 102 | 235 | 0.44 | 0.0582 | 0.0017 | 0.5390 | 0.0160 | 0.0672 | 0.0008 | 538  | 63  | 438  | 10 | 419  | 5  | 104.5 | 419  | 5  |
| LT07A-78 | 62  | 140 | 0.44 | 0.0600 | 0.0019 | 0.6300 | 0.0200 | 0.0762 | 0.0010 | 602  | 67  | 496  | 12 | 473  | 6  | 104.9 | 473  | 6  |
| LT07A-79 | 119 | 316 | 0.38 | 0.0578 | 0.0015 | 0.6070 | 0.0160 | 0.0761 | 0.0009 | 523  | 56  | 481  | 10 | 473  | 5  | 101.7 | 473  | 5  |
| LT07A-80 | 72  | 136 | 0.53 | 0.0552 | 0.0019 | 0.5620 | 0.0190 | 0.0739 | 0.0009 | 421  | 72  | 453  | 12 | 460  | 6  | 98.5  | 460  | 6  |
| LT07A-81 | 132 | 362 | 0.37 | 0.0547 | 0.0014 | 0.5610 | 0.0150 | 0.0744 | 0.0009 | 399  | 57  | 452  | 9  | 463  | 5  | 97.6  | 463  | 5  |
| LT07A-82 | 136 | 231 | 0.59 | 0.0550 | 0.0016 | 0.5740 | 0.0160 | 0.0758 | 0.0009 | 412  | 63  | 461  | 11 | 471  | 6  | 97.9  | 471  | 6  |
| LT07A-83 | 271 | 350 | 0.77 | 0.0553 | 0.0015 | 0.5560 | 0.0150 | 0.0729 | 0.0009 | 426  | 58  | 449  | 10 | 453  | 5  | 99.1  | 453  | 5  |

Sample 681, greywacke sandstone, Middle Devonian Saaerming Formation in the Wuwamen area of STB, (Ma et al., 2012b, Precambrian Research)

|        |      |      |      |        |        |        |        |        |        |      |     |      |    |      |    |       |            |     |
|--------|------|------|------|--------|--------|--------|--------|--------|--------|------|-----|------|----|------|----|-------|------------|-----|
| 681-01 | 110  | 90   | 1.22 | 0.1931 | 0.0033 | 14.072 | 0.2675 | 0.5285 | 0.0079 | 2768 | 14  | 2755 | 18 | 2735 | 33 | 101.2 | 2768       | 14  |
| 681-02 | 659  | 413  | 1.60 | 0.0579 | 0.0014 | 0.6940 | 0.0173 | 0.0869 | 0.0013 | 526  | 29  | 535  | 10 | 537  | 8  | 99.6  | 537        | 8   |
| 681-03 | 140  | 252  | 0.56 | 0.0712 | 0.0019 | 1.631  | 0.0460 | 0.1659 | 0.0027 | 963  | 32  | 982  | 18 | 990  | 15 | 99.2  | 990        | 15  |
| 681-04 | 217  | 243  | 0.89 | 0.0745 | 0.0022 | 1.904  | 0.0564 | 0.1852 | 0.0033 | 1056 | 32  | 1082 | 20 | 1095 | 18 | 96.4  | 1056       | 32  |
| 681-05 | 396  | 465  | 0.85 | 0.0625 | 0.0015 | 1.115  | 0.0284 | 0.1294 | 0.0021 | 693  | 28  | 760  | 14 | 784  | 12 | 96.9  | 784        | 12  |
| 681-06 | 202  | 112  | 1.81 | 0.0773 | 0.0026 | 2.064  | 0.0690 | 0.1939 | 0.0034 | 1128 | 39  | 1137 | 23 | 1142 | 18 | 98.8  | 1128       | 39  |
| 681-07 | 258  | 209  | 1.24 | 0.1666 | 0.0056 | 10.858 | 0.3648 | 0.4734 | 0.0084 | 2524 | 33  | 2511 | 31 | 2498 | 37 | 101.0 | 2524       | 33  |
| 681-08 | 2465 | 841  | 2.93 | 0.0736 | 0.0020 | 1.739  | 0.0474 | 0.1718 | 0.0028 | 1032 | 30  | 1023 | 18 | 1022 | 15 | 101.0 | 1032       | 30  |
| 681-09 | 663  | 461  | 1.44 | 0.0977 | 0.0060 | 3.774  | 0.2237 | 0.2800 | 0.0071 | 1581 | 73  | 1587 | 48 | 1591 | 36 | 99.4  | 1581       | 73  |
| 681-10 | 390  | 476  | 0.82 | 0.1300 | 0.0027 | 6.927  | 0.1495 | 0.3876 | 0.0058 | 2098 | 19  | 2102 | 19 | 2112 | 27 | 99.3  | 2098       | 19  |
| 681-11 | 170  | 491  | 0.35 | 0.0740 | 0.0018 | 1.793  | 0.0461 | 0.1769 | 0.0031 | 1040 | 26  | 1043 | 17 | 1050 | 17 | 99.0  | 1040       | 26  |
| 681-12 | 230  | 119  | 1.94 | 0.0715 | 0.0039 | 1.212  | 0.0654 | 0.1232 | 0.0027 | 972  | 75  | 806  | 30 | 749  | 15 | 107.6 | 749        | 15  |
| 681-13 | 194  | 1388 | 0.14 | 0.0809 | 0.0048 | 2.305  | 0.1350 | 0.2077 | 0.0049 | 1218 | 78  | 1214 | 41 | 1216 | 26 | 100.2 | 1218       | 78  |
| 681-14 | 135  | 205  | 0.66 | 0.1023 | 0.0054 | 4.177  | 0.2181 | 0.2968 | 0.0066 | 1666 | 64  | 1670 | 43 | 1676 | 33 | 99.4  | 1666       | 64  |
| 681-15 | 58   | 74   | 0.79 | 0.0743 | 0.0063 | 1.789  | 0.1469 | 0.1747 | 0.0053 | 1049 | 117 | 1041 | 53 | 1038 | 29 | 101.1 | 1049       | 117 |
| 681-16 | 1158 | 2098 | 0.55 | 0.1275 | 0.0045 | 6.523  | 0.2329 | 0.3718 | 0.0067 | 2064 | 38  | 2049 | 31 | 2038 | 31 | 101.3 | 2064       | 38  |
| 681-17 | 704  | 3613 | 0.19 | 0.0824 | 0.0021 | 2.454  | 0.0674 | 0.2161 | 0.0037 | 1256 | 28  | 1258 | 20 | 1261 | 20 | 99.6  | 1256       | 28  |
| 681-18 | 284  | 339  | 0.84 | 0.1027 | 0.0049 | 4.163  | 0.1968 | 0.2941 | 0.0060 | 1674 | 57  | 1667 | 39 | 1662 | 30 | 100.7 | 1674       | 57  |
| 681-19 | 434  | 420  | 1.04 | 0.0614 | 0.0045 | 0.8042 | 0.0579 | 0.0951 | 0.0025 | 654  | 110 | 599  | 33 | 586  | 14 | 102.2 | 586        | 14  |
| 681-20 | 468  | 586  | 0.80 | 0.0742 | 0.0023 | 1.810  | 0.0572 | 0.1772 | 0.0031 | 1046 | 36  | 1049 | 21 | 1052 | 17 | 99.4  | 1046       | 36  |
| 681-21 | 295  | 506  | 0.58 | 0.0662 | 0.0085 | 1.020  | 0.1253 | 0.1120 | 0.0044 | 814  | 193 | 714  | 63 | 685  | 26 | 104.2 | 685        | 26  |
| 681-22 | 305  | 176  | 1.74 | 0.1117 | 0.0032 | 4.780  | 0.1401 | 0.3114 | 0.0055 | 1828 | 29  | 1781 | 25 | 1747 | 27 | 104.6 | 1828       | 29  |
| 681-23 | 403  | 581  | 0.69 | 0.0586 | 0.0015 | 0.7011 | 0.0189 | 0.0870 | 0.0014 | 552  | 32  | 539  | 11 | 538  | 8  | 100.2 | 538        | 8   |
| 681-24 | 176  | 270  | 0.65 | 0.0677 | 0.0009 | 1.319  | 0.0218 | 0.1414 | 0.0020 | 858  | 15  | 854  | 10 | 852  | 11 | 100.2 | 852        | 11  |
| 681-25 | 168  | 523  | 0.32 | 0.0561 | 0.0012 | 0.5483 | 0.0114 | 0.0709 | 0.0010 | 457  | 24  | 444  | 7  | 442  | 6  | 100.5 | 442        | 6   |
| 681-26 | 154  | 133  | 1.16 | 0.1019 | 0.0022 | 4.115  | 0.0886 | 0.2931 | 0.0041 | 1658 | 20  | 1657 | 18 | 1657 | 21 | 100.1 | 1658       | 20  |
| 681-27 | 176  | 990  | 0.18 | 0.0706 | 0.0009 | 1.542  | 0.0229 | 0.1584 | 0.0021 | 947  | 14  | 947  | 9  | 948  | 12 | 99.9  | 948        | 12  |
| 681-28 | 169  | 304  | 0.56 | 0.0694 | 0.0010 | 1.450  | 0.0224 | 0.1515 | 0.0020 | 912  | 14  | 910  | 9  | 909  | 11 | 100.1 | 909        | 11  |
| 681-29 | 250  | 374  | 0.67 | 0.0554 | 0.0014 | 0.5320 | 0.0130 | 0.0696 | 0.0010 | 430  | 30  | 433  | 9  | 434  | 6  | 99.8  | 434        | 6   |
| 681-30 | 253  | 426  | 0.59 | 0.0561 | 0.0010 | 0.5669 | 0.0105 | 0.0734 | 0.0010 | 455  | 20  | 456  | 7  | 456  | 6  | 100.0 | 456        | 6   |
| 681-31 | 341  | 539  | 0.63 | 0.0763 | 0.0016 | 1.972  | 0.0442 | 0.1874 | 0.0030 | 1104 | 22  | 1106 | 15 | 1107 | 16 | 99.7  | 1104       | 22  |
| 681-32 | 152  | 118  | 1.29 | 0.2404 | 0.0060 | 20.719 | 0.5439 | 0.6238 | 0.0114 | 3123 | 21  | 3126 | 25 | 3125 | 45 | 99.9  | 3123       | 21  |
| 681-33 | 40   | 25   | 1.62 | 0.0605 | 0.0102 | 0.8572 | 0.1380 | 0.1030 | 0.0058 | 620  | 255 | 629  | 75 | 632  | 34 | 99.5  | 632        | 34  |
| 681-34 | 42   | 33   | 1.28 | 0.2218 | 0.0140 | 18.181 | 1.125  | 0.5930 | 0.0210 | 2994 | 56  | 2999 | 60 | 3002 | 85 | 99.7  | 2994       | 56  |
| 681-35 | 577  | 718  | 0.80 | 0.0747 | 0.0011 | 1.643  | 0.0281 | 0.1596 | 0.0022 | 1060 | 16  | 987  | 11 | 954  | 12 | 103.5 | 954        | 12  |
| 681-36 | 403  | 505  | 0.80 | 0.0559 | 0.0010 | 0.5530 | 0.0102 | 0.0717 | 0.0010 | 449  | 20  | 447  | 7  | 446  | 6  | 100.2 | 446        | 6   |
| 681-37 | 875  | 583  | 1.50 | 0.0563 | 0.0010 | 0.5682 | 0.0107 | 0.0732 | 0.0010 | 465  | 20  | 457  | 7  | 455  | 6  | 100.4 | 455        | 6   |
| 681-38 | 241  | 1286 | 0.19 | 0.1146 | 0.0039 | 4.482  | 0.1512 | 0.2830 | 0.0058 | 1873 | 33  | 1728 | 28 | 1606 | 29 | 116.6 | Discordant |     |
| 681-39 | 167  | 151  | 1.10 | 0.0928 | 0.0058 | 3.227  | 0.1922 | 0.2520 | 0.0071 | 1485 | 70  | 1464 | 46 | 1449 | 37 | 102.5 | 1485       | 70  |
| 681-40 | 185  | 420  | 0.44 | 0.1105 | 0.0006 | 4.984  | 0.0682 | 0.3255 | 0.0041 | 1808 | 11  | 1817 | 12 | 1817 | 20 | 99.5  | 1808       | 11  |
| 681-41 | 755  | 1031 | 0.73 | 0.0641 | 0.0009 | 1.093  | 0.0174 | 0.1238 | 0.0017 | 745  | 15  | 750  | 8  | 752  | 10 | 99.7  | 752        | 10  |
| 681-42 | 194  | 271  | 0.72 | 0.0708 | 0.0015 | 1.551  | 0.0333 | 0.1588 | 0.0022 | 952  | 23  | 951  | 13 | 950  | 12 | 100.1 | 950        | 12  |
| 681-43 | 388  | 561  | 0.69 | 0.0559 | 0.0009 | 0.5467 | 0.0094 | 0.0710 | 0.0010 | 447  | 18  | 443  | 6  | 442  | 6  | 100.2 | 442        | 6   |
| 681-44 | 399  | 337  | 1.18 | 0.0971 | 0.0013 | 3.691  | 0.0584 | 0.2758 | 0.0038 | 1569 | 13  | 1569 | 13 | 1570 | 19 | 99.9  | 1569       | 13  |
| 681-45 | 124  | 97   | 1.28 | 0.0942 | 0.0015 | 3.433  | 0.0590 | 0.2642 | 0.0037 | 1513 | 15  | 1512 | 14 | 1511 | 19 | 100.1 | 1513       | 15  |
| 681-46 | 43   | 47   | 0.91 | 0.0569 | 0.0027 | 0.6033 | 0.0281 | 0.0770 | 0.0015 | 486  | 69  | 479  | 18 | 478  | 9  | 100.2 | 478        | 9   |
| 681-47 | 74   | 1358 | 0.05 | 0.0813 | 0.0027 | 2.343  | 0.0810 | 0.2090 | 0.0042 | 1229 | 37  | 1226 | 25 | 1224 | 22 | 100.4 | 1229       | 37  |
| 681-48 | 257  | 205  | 1.26 | 0.0728 | 0.0016 | 1.682  | 0.0389 | 0.1679 | 0.0026 | 1004 | 24  | 1002 | 15 | 1001 | 14 | 100.3 | 1004       | 24  |
| 681-49 | 172  | 606  | 0.28 | 0.0958 | 0.0016 | 3.566  | 0.0895 | 0.2701 | 0.0041 | 1543 | 17  | 1542 | 15 | 1541 | 21 | 100.1 | 1543       | 17  |
| 681-50 | 568  | 1030 | 0.55 | 0.0575 | 0.0015 | 0.6450 | 0.0177 | 0.0814 | 0.0015 | 510  | 30  | 505  | 11 | 505  | 9  | 100.0 | 505        | 9   |
| 681-51 | 587  | 616  | 0.95 | 0.1523 | 0.0041 | 6.667  | 0.1870 | 0.3177 | 0.0057 | 2371 | 25  | 2068 | 25 | 1778 | 28 | 133.4 | Discordant |     |
| 681-52 | 82   | 52   | 1.58 | 0.1135 | 0.0017 | 5.216  | 0.0865 | 0.3334 | 0.0046 | 1856 | 14  | 1855 | 14 | 1855 | 22 | 100.1 | 1856       | 14  |
| 681-53 | 110  | 222  | 0.49 | 0.0707 | 0.0010 | 1.520  | 0.0249 | 0.1559 | 0.0021 | 949  | 15  | 938  | 10 | 934  | 12 | 100.4 | 934        | 12  |
| 681-54 | 372  | 238  | 1.57 | 0.0573 | 0.0010 | 0.6272 | 0.0115 | 0.0795 | 0.0010 | 501  | 19  | 494  | 7  | 493  | 7  | 100.2 | 493        | 7   |
| 681-55 | 21   | 166  | 0.13 | 0.0945 | 0.0025 | 3.284  | 0.0869 | 0.2518 | 0.0040 | 1518 | 27  | 1477 | 21 | 1448 | 21 | 104.8 | 1518       | 27  |
| 681-56 | 26   | 1074 | 0.02 | 0.0712 | 0.0011 | 1.707  | 0.0289 | 0.1738 | 0.0024 | 964  | 16  | 1011 | 11 | 1033 | 13 | 93.3  | 964        | 16  |
| 681-57 | 516  | 1468 | 0.35 | 0.0666 | 0.0023 | 1.168  | 0.0790 | 0.1284 | 0.0122 | 824  | 96  | 786  | 37 | 779  | 70 | 100.9 | 779        | 70  |
| 681-58 | 69   | 69   | 1.01 | 0.1685 | 0.0048 | 11.789 | 0.3323 | 0.5065 | 0.0088 | 2543 | 25  | 2588 | 26 | 2641 | 38 | 99.3  | 2543       | 25  |
| 681-59 | 153  | 202  | 0.76 | 0.1623 | 0.0013 | 10.537 | 0.1468 | 0.4695 | 0.0051 | 2479 | 11  | 2483 | 13 | 2481 | 22 | 99.9  | 2479       | 11  |
| 681-60 | 199  | 75   | 2.64 | 0.0648 | 0.0019 | 1.122  | 0.0332 | 0.1257 | 0.0020 | 767  | 36  | 764  | 16 | 763  | 11 | 100.1 | 763        | 11  |
| 681-61 | 11   | 464  | 0.02 | 0.2028 | 0.0068 | 15.487 | 0.5223 | 0.5540 | 0.0110 | 2848 | 30  | 2846 | 32 | 2842 | 45 | 100.2 | 2848       | 30  |
| 681-62 | 171  | 208  | 0.82 | 0.0570 | 0.0012 | 0.6045 | 0.0129 | 0.0769 | 0.0011 | 491  | 24  | 480  | 8  | 478  | 6  | 100.4 | 478        | 6   |
| 681-63 | 90   | 120  | 0.75 | 0.1143 | 0.0018 | 5.176  | 0.0865 | 0.3285 | 0.0044 | 1869 | 14  | 1849 | 14 | 1831 | 21 | 102.1 | 1869       | 14  |
| 681-64 | 188  | 207  | 0.91 | 0.1654 | 0.0028 | 10.761 | 0.1939 | 0.4720 | 0.0065 | 2511 | 14  | 2503 | 17 | 2492 | 28 | 100.8 | 2511       | 14  |
| 681-65 | 270  | 170  | 1.59 | 0.0658 | 0.0013 | 1.194  | 0.0254 | 0.1316 | 0.0019 | 799  | 22  | 798  | 12 | 797  | 11 | 100.1 | 797        | 11  |
| 681-66 | 210  | 175  | 1.20 | 0.0784 | 0.0018 | 2.113  | 0.0504 | 0.1957 | 0.0032 | 1157 | 23  | 1153 | 16 | 1152 | 17 | 100.4 | 1157       | 23  |
| 681-67 | 188  | 360  | 0.52 | 0.0714 | 0.0009 | 1.569  | 0.0233 | 0.1594 | 0.0021 | 970  | 14  | 958  | 9  | 953  | 12 | 100.5 | 953        | 12  |
| 681-68 | 46   | 107  | 0.43 | 0.0829 | 0.0024 | 2.467  | 0.0730 | 0.2165 | 0.0040 | 1268 | 31  | 1263 | 21 | 1263 | 21 | 100.4 | 1268       | 31  |
| 681-69 | 142  | 635  | 0.22 | 0.0953 | 0.0012 | 3.503  | 0.0505 | 0.2665 | 0.0035 | 1535 | 12  | 1528 | 11 | 1523 | 18 | 100.8 | 1535       | 12  |
| 681-70 | 612  | 590  | 1.04 | 0.0561 | 0.0008 | 0.5575 | 0.0088 | 0.0721 | 0.0010 | 455  | 16  | 450  | 6  | 449  | 6  | 100.2 | 449        | 6   |
| 681-71 | 190  | 271  |      |        |        |        |        |        |        |      |     |      |    |      |    |       |            |     |

|        |      |      |      |        |        |        |        |        |           |      |     |      |    |      |    |       |            |    |
|--------|------|------|------|--------|--------|--------|--------|--------|-----------|------|-----|------|----|------|----|-------|------------|----|
| 682-05 | 183  | 197  | 0.93 | 0.1574 | 0.0055 | 9.673  | 0.3363 | 0.4467 | 0.0082    | 2427 | 35  | 2404 | 32 | 2380 | 36 | 102.0 | 2427       | 35 |
| 682-06 | 496  | 487  | 1.02 | 0.1759 | 0.0036 | 12.101 | 0.2670 | 0.4993 | 0.0078    | 2615 | 18  | 2612 | 21 | 2611 | 34 | 100.2 | 2615       | 18 |
| 682-07 | 534  | 866  | 0.62 | 0.0961 | 0.0042 | 3.549  | 0.1524 | 0.2683 | 0.0053    | 1549 | 51  | 1538 | 34 | 1532 | 27 | 101.1 | 1549       | 51 |
| 682-08 | 650  | 503  | 1.29 | 0.0763 | 0.0020 | 1.980  | 0.0540 | 0.1886 | 0.0030    | 1104 | 30  | 1109 | 18 | 1114 | 16 | 99.1  | 1104       | 30 |
| 682-09 | 509  | 1119 | 0.45 | 0.0693 | 0.0013 | 1.548  | 0.0321 | 0.1624 | 0.0025    | 908  | 20  | 950  | 13 | 970  | 14 | 97.9  | 970        | 14 |
| 682-10 | 228  | 269  | 0.85 | 0.1566 | 0.0051 | 9.332  | 0.3033 | 0.4331 | 0.0076    | 2419 | 32  | 2371 | 30 | 2320 | 34 | 104.3 | 2419       | 32 |
| 682-11 | 189  | 111  | 1.71 | 0.0642 | 0.0029 | 1.147  | 0.0509 | 0.1299 | 0.0025    | 749  | 62  | 776  | 24 | 787  | 14 | 98.6  | 749        | 62 |
| 682-12 | 288  | 371  | 0.78 | 0.0769 | 0.0019 | 2.140  | 0.0552 | 0.2028 | 0.0033    | 1118 | 27  | 1162 | 18 | 1190 | 18 | 93.9  | 1118       | 27 |
| 682-13 | 632  | 932  | 0.68 | 0.0650 | 0.0016 | 1.207  | 0.0316 | 0.1356 | 0.0023    | 775  | 28  | 804  | 15 | 820  | 13 | 98.0  | 820        | 13 |
| 682-14 | 372  | 378  | 0.98 | 0.0705 | 0.0020 | 1.565  | 0.0459 | 0.1614 | 0.0027    | 943  | 34  | 956  | 18 | 964  | 15 | 99.2  | 964        | 15 |
| 682-15 | 346  | 485  | 0.71 | 0.0711 | 0.0021 | 1.589  | 0.0482 | 0.1623 | 0.0027    | 961  | 35  | 966  | 19 | 970  | 15 | 99.6  | 970        | 15 |
| 682-16 | 179  | 367  | 0.49 | 0.1609 | 0.0070 | 10.312 | 0.4554 | 0.4653 | 0.0102    | 2465 | 45  | 2463 | 41 | 2463 | 45 | 100.1 | 2465       | 45 |
| 682-17 | 118  | 171  | 0.69 | 0.1681 | 0.0090 | 11.259 | 0.5931 | 0.4858 | 0.0107    | 2539 | 59  | 2545 | 49 | 2552 | 46 | 99.5  | 2539       | 59 |
| 682-18 | 724  | 1129 | 0.64 | 0.3401 | 0.0133 | 35.841 | 1.411  | 0.7646 | 0.0137    | 3663 | 38  | 3662 | 39 | 3661 | 50 | 100.1 | 3663       | 38 |
| 682-19 | 257  | 1046 | 0.25 | 0.0764 | 0.0023 | 1.980  | 0.0610 | 0.1882 | 0.0032    | 1105 | 35  | 1109 | 21 | 1111 | 17 | 99.5  | 1105       | 35 |
| 682-20 | 410  | 598  | 0.69 | 0.0684 | 0.0026 | 1.348  | 0.0504 | 0.1434 | 0.0027    | 879  | 46  | 867  | 22 | 864  | 15 | 100.3 | 864        | 15 |
| 682-21 | 135  | 103  | 1.32 | 0.0669 | 0.0076 | 1.242  | 0.1377 | 0.1348 | 0.0046    | 836  | 175 | 820  | 62 | 815  | 26 | 100.6 | 815        | 26 |
| 682-22 | 165  | 175  | 0.95 | 0.0758 | 0.0051 | 1.905  | 0.1217 | 0.1820 | 0.0047    | 1090 | 87  | 1083 | 43 | 1078 | 25 | 101.1 | 1090       | 87 |
| 682-23 | 282  | 261  | 1.08 | 0.0954 | 0.0056 | 3.521  | 0.1981 | 0.2676 | 0.0071    | 1536 | 66  | 1532 | 44 | 1529 | 36 | 100.5 | 1536       | 66 |
| 682-24 | 707  | 777  | 0.91 | 0.0679 | 0.0020 | 1.444  | 0.0428 | 0.1548 | 0.0027    | 866  | 34  | 907  | 18 | 928  | 15 | 97.7  | 928        | 15 |
| 682-25 | 593  | 154  | 3.86 | 0.0625 | 0.0036 | 1.162  | 0.0647 | 0.1358 | 0.0032    | 690  | 78  | 783  | 30 | 821  | 18 | 95.4  | 821        | 18 |
| 682-26 | 490  | 325  | 1.51 | 0.0561 | 0.0044 | 0.5927 | 0.0444 | 0.0767 | 0.0022    | 456  | 116 | 473  | 28 | 476  | 13 | 99.4  | 476        | 13 |
| 682-27 | 51   | 71   | 0.72 | 0.1365 | 0.0018 | 7.577  | 0.1172 | 0.4027 | 0.0056    | 2184 | 12  | 2182 | 14 | 2181 | 26 | 100.1 | 2184       | 12 |
| 682-28 | 485  | 724  | 0.67 | 0.1147 | 0.0018 | 5.374  | 0.0938 | 0.3402 | 0.0046    | 1875 | 15  | 1881 | 15 | 1888 | 22 | 99.3  | 1875       | 15 |
| 682-29 | 45   | 172  | 0.26 | 0.1190 | 0.0025 | 5.096  | 0.1090 | 0.3110 | 0.0045    | 1941 | 19  | 1835 | 18 | 1745 | 22 | 111.2 | Discordant |    |
| 682-30 | 191  | 230  | 0.83 | 0.0690 | 0.0015 | 1.415  | 0.0328 | 0.1488 | 0.0023    | 898  | 24  | 895  | 14 | 894  | 13 | 100.1 | 894        | 13 |
| 682-31 | 75   | 112  | 0.67 | 0.1114 | 0.0065 | 4.742  | 0.2658 | 0.3096 | 0.0079    | 1822 | 65  | 1775 | 47 | 1739 | 39 | 104.8 | 1822       | 65 |
| 682-32 | 1576 | 1081 | 1.46 | 0.0541 | 0.0049 | 0.4390 | 0.0381 | 0.0590 | 0.0019    | 374  | 137 | 370  | 27 | 369  | 12 | 100.3 | 369        | 12 |
| 682-33 | 790  | 1060 | 0.74 | 0.0547 | 0.0020 | 0.4731 | 0.0169 | 0.0628 | 0.0011    | 399  | 50  | 393  | 12 | 393  | 7  | 100.0 | 393        | 7  |
| 682-34 | 89   | 69   | 1.30 | 0.0678 | 0.0015 | 1.415  | 0.0322 | 0.1514 | 0.0023    | 863  | 24  | 895  | 14 | 909  | 13 | 98.5  | 909        | 13 |
| 682-35 | 141  | 128  | 1.10 | 0.1097 | 0.0033 | 4.858  | 0.1441 | 0.3214 | 0.0053    | 1795 | 31  | 1795 | 25 | 1797 | 26 | 99.9  | 1795       | 31 |
| 682-36 | 201  | 225  | 0.89 | 0.0731 | 0.0013 | 1.723  | 0.0339 | 0.1709 | 0.0025    | 1018 | 19  | 1017 | 13 | 1017 | 14 | 100.1 | 1018       | 19 |
| 682-37 | 346  | 241  | 1.44 | 0.0991 | 0.0015 | 3.853  | 0.0671 | 0.2820 | 0.0040    | 1607 | 15  | 1604 | 14 | 1602 | 20 | 100.3 | 1607       | 15 |
| 682-38 | 298  | 399  | 0.75 | 0.0795 | 0.0013 | 2.256  | 0.0407 | 0.2059 | 0.0029    | 1184 | 16  | 1199 | 13 | 1207 | 16 | 98.1  | 1184       | 16 |
| 682-39 | 457  | 432  | 1.06 | 0.0564 | 0.0010 | 0.5853 | 0.0110 | 0.0727 | 0.0010    | 469  | 21  | 455  | 7  | 452  | 6  | 100.7 | 452        | 6  |
| 682-40 | 146  | 172  | 0.85 | 0.0562 | 0.0018 | 0.5808 | 0.0184 | 0.0749 | 0.0012    | 461  | 42  | 465  | 12 | 466  | 7  | 99.8  | 466        | 7  |
| 682-41 | 43   | 165  | 0.87 | 0.0686 | 0.0012 | 1.388  | 0.0254 | 0.1467 | 0.0020    | 886  | 18  | 884  | 11 | 883  | 11 | 100.1 | 883        | 11 |
| 682-42 | 271  | 640  | 0.42 | 0.0551 | 0.0040 | 0.4862 | 0.0339 | 0.0641 | 0.0020    | 418  | 101 | 402  | 23 | 400  | 12 | 100.5 | 400        | 12 |
| 682-43 | 284  | 237  | 1.20 | 0.0590 | 0.0021 | 0.7427 | 0.0262 | 0.0914 | 0.0016    | 565  | 47  | 564  | 15 | 564  | 9  | 100.0 | 564        | 9  |
| 682-44 | 384  | 483  | 0.80 | 0.0729 | 0.0011 | 1.695  | 0.0283 | 0.1687 | v.0.00235 | 1010 | 15  | 1006 | 11 | 1005 | 13 | 100.5 | 1010       | 15 |
| 682-45 | 50   | 42   | 1.18 | 0.1134 | 0.0021 | 5.192  | 0.1004 | 0.3320 | 0.0048    | 1854 | 17  | 1851 | 16 | 1848 | 23 | 100.3 | 1854       | 17 |
| 682-46 | 693  | 697  | 1.00 | 0.0704 | 0.0031 | 1.517  | 0.0648 | 0.1562 | 0.0031    | 941  | 56  | 937  | 26 | 936  | 17 | 100.1 | 936        | 17 |
| 682-47 | 113  | 94   | 1.20 | 0.1453 | 0.0098 | 8.254  | 0.5292 | 0.4153 | 0.0133    | 2291 | 67  | 2259 | 58 | 2239 | 61 | 102.3 | 2291       | 67 |
| 682-48 | 414  | 288  | 1.44 | 0.1734 | 0.0033 | 11.425 | 0.2233 | 0.4774 | 0.0066    | 2591 | 16  | 2558 | 18 | 2516 | 29 | 103.0 | 2591       | 16 |
| 682-49 | 161  | 85   | 1.90 | 0.0710 | 0.0017 | 1.565  | 0.0385 | 0.1597 | 0.0024    | 958  | 27  | 956  | 15 | 955  | 14 | 100.1 | 955        | 14 |
| 682-50 | 391  | 111  | 3.51 | 0.1010 | 0.0019 | 3.936  | 0.0781 | 0.2825 | 0.0040    | 1642 | 18  | 1621 | 16 | 1604 | 20 | 102.4 | 1642       | 18 |
| 682-51 | 296  | 438  | 0.67 | 0.0562 | 0.0017 | 0.5675 | 0.0169 | 0.0733 | 0.0012    | 459  | 38  | 456  | 11 | 456  | 7  | 100.0 | 456        | 7  |
| 682-52 | 161  | 377  | 0.43 | 0.0708 | 0.0011 | 1.506  | 0.0252 | 0.1542 | 0.0021    | 953  | 16  | 933  | 10 | 924  | 12 | 101.0 | 924        | 12 |
| 682-53 | 193  | 675  | 0.29 | 0.0718 | 0.0011 | 1.577  | 0.0273 | 0.1591 | 0.0022    | 981  | 16  | 961  | 11 | 952  | 12 | 100.9 | 952        | 12 |
| 682-54 | 45   | 33   | 1.35 | 0.1179 | 0.0041 | 5.530  | 0.1880 | 0.3403 | 0.0068    | 1925 | 34  | 1905 | 29 | 1888 | 33 | 102.0 | 1925       | 34 |
| 682-55 | 410  | 924  | 0.44 | 0.1607 | 0.0025 | 10.293 | 0.1775 | 0.4647 | 0.0064    | 2463 | 13  | 2462 | 16 | 2460 | 28 | 100.1 | 2463       | 13 |
| 682-56 | 36   | 20   | 1.76 | 0.1245 | 0.0062 | 6.169  | 0.2919 | 0.3599 | 0.0093    | 2022 | 48  | 2000 | 41 | 1982 | 44 | 102.0 | 2022       | 48 |
| 682-57 | 257  | 310  | 0.83 | 0.0836 | 0.0017 | 2.539  | 0.0543 | 0.2203 | 0.0032    | 1282 | 21  | 1283 | 16 | 1284 | 17 | 99.8  | 1282       | 21 |
| 682-58 | 133  | 181  | 0.74 | 0.0745 | 0.0014 | 1.876  | 0.0384 | 0.1828 | 0.0026    | 1054 | 20  | 1073 | 14 | 1082 | 14 | 97.4  | 1054       | 20 |
| 682-59 | 738  | 594  | 1.24 | 0.0562 | 0.0014 | 0.5696 | 0.0140 | 0.0734 | 0.0011    | 462  | 29  | 458  | 9  | 457  | 6  | 100.2 | 457        | 6  |
| 682-60 | 76   | 73   | 1.04 | 0.0576 | 0.0021 | 0.6541 | 0.0239 | 0.0824 | 0.0014    | 514  | 50  | 511  | 15 | 510  | 8  | 100.2 | 510        | 8  |
| 682-61 | 85   | 75   | 1.13 | 0.1611 | 0.0024 | 10.143 | 0.1801 | 0.4567 | 0.0068    | 2467 | 14  | 2448 | 16 | 2425 | 30 | 101.7 | 2467       | 14 |
| 682-62 | 222  | 125  | 1.77 | 0.0728 | 0.0011 | 1.758  | 0.0314 | 0.1753 | 0.0026    | 1007 | 16  | 1030 | 12 | 1041 | 14 | 96.7  | 1007       | 16 |
| 682-63 | 422  | 612  | 0.69 | 0.0562 | 0.0008 | 0.5679 | 0.0096 | 0.0733 | 0.0011    | 459  | 17  | 457  | 6  | 456  | 6  | 100.2 | 456        | 6  |
| 682-64 | 438  | 188  | 2.33 | 0.0713 | 0.0011 | 1.525  | 0.0274 | 0.1553 | 0.0023    | 966  | 17  | 941  | 11 | 930  | 13 | 101.2 | 930        | 13 |
| 682-65 | 85   | 68   | 1.26 | 0.2692 | 0.0039 | 24.802 | 0.4177 | 0.6684 | 0.0097    | 3301 | 12  | 3300 | 16 | 3300 | 38 | 100.0 | 3301       | 12 |
| 682-66 | 861  | 307  | 2.80 | 0.0971 | 0.0014 | 3.751  | 0.0620 | 0.2803 | 0.0040    | 1568 | 14  | 1582 | 13 | 1593 | 20 | 98.4  | 1568       | 14 |
| 682-67 | 163  | 354  | 0.46 | 0.0938 | 0.0045 | 3.356  | 0.1580 | 0.2631 | 0.0063    | 1503 | 53  | 1494 | 37 | 1506 | 32 | 99.8  | 1503       | 53 |
| 682-68 | 105  | 68   | 1.55 | 0.0591 | 0.0015 | 0.7361 | 0.0186 | 0.0904 | 0.0014    | 570  | 30  | 560  | 11 | 558  | 8  | 100.4 | 558        | 8  |
| 682-69 | 278  | 91   | 3.04 | 0.0594 | 0.0015 | 0.7460 | 0.0186 | 0.0911 | 0.0014    | 583  | 29  | 566  | 11 | 562  | 8  | 100.7 | 562        | 8  |
| 682-70 | 156  | 118  | 1.32 | 0.1570 | 0.0022 | 9.194  | 0.1502 | 0.4248 | 0.0061    | 2423 | 12  | 2357 | 15 | 2282 | 27 | 106.2 | 2423       | 12 |
| 682-71 | 110  | 100  | 1.09 | 0.0744 | 0.0013 | 1.766  | 0.0331 | 0.1722 | 0.0025    | 1051 | 18  | 1033 | 12 | 1024 | 14 | 102.6 | 1051       | 18 |
| 682-72 | 122  | 520  | 0.23 | 0.0664 | 0.0049 | 1.193  | 0.0813 | 0.1302 | 0.0036    | 820  | 96  | 797  | 38 | 789  | 21 | 101.0 | 789        | 21 |
| 682-73 | 137  | 112  | 1.22 | 0.0556 | 0.0013 | 0.5487 | 0.0138 | 0.0716 | 0.0011    | 436  | 30  | 444  | 9  | 446  | 7  | 99.6  | 446        | 7  |
| 682-74 | 341  | 208  | 1.64 | 0.0566 | 0.0011 | 0.6093 | 0.0122 | 0.0782 | 0.0011    |      |     |      |    |      |    |       |            |    |

|        |      |     |      |        |        |        |        |        |        |      |    |      |    |      |    |       |      |    |
|--------|------|-----|------|--------|--------|--------|--------|--------|--------|------|----|------|----|------|----|-------|------|----|
| 683-47 | 691  | 275 | 2.51 | 0.0812 | 0.0031 | 2.315  | 0.0868 | 0.2070 | 0.0044 | 1227 | 42 | 1217 | 27 | 1213 | 23 | 101.2 | 1227 | 42 |
| 683-48 | 195  | 326 | 0.60 | 0.0707 | 0.0009 | 1.526  | 0.0221 | 0.1565 | 0.0021 | 949  | 13 | 941  | 9  | 938  | 12 | 100.3 | 938  | 12 |
| 683-49 | 434  | 720 | 0.60 | 0.1660 | 0.0029 | 10.976 | 0.2129 | 0.4800 | 0.0072 | 2518 | 15 | 2521 | 18 | 2527 | 31 | 99.6  | 2518 | 15 |
| 683-50 | 283  | 263 | 1.08 | 0.0710 | 0.0013 | 1.544  | 0.0289 | 0.1578 | 0.0021 | 957  | 19 | 948  | 12 | 944  | 12 | 100.4 | 944  | 12 |
| 683-51 | 306  | 237 | 1.29 | 0.0684 | 0.0009 | 1.157  | 0.0179 | 0.1226 | 0.0016 | 882  | 14 | 781  | 8  | 746  | 9  | 104.7 | 746  | 9  |
| 683-52 | 163  | 179 | 0.91 | 0.0779 | 0.0011 | 2.079  | 0.0323 | 0.1937 | 0.0025 | 1144 | 14 | 1142 | 11 | 1141 | 14 | 100.3 | 1144 | 14 |
| 683-53 | 650  | 397 | 1.64 | 0.0571 | 0.0011 | 0.5542 | 0.0108 | 0.0704 | 0.0010 | 496  | 21 | 448  | 7  | 438  | 6  | 102.3 | 438  | 6  |
| 683-54 | 89   | 75  | 1.19 | 0.0856 | 0.0013 | 2.687  | 0.0438 | 0.2276 | 0.0030 | 1330 | 14 | 1325 | 12 | 1322 | 16 | 100.6 | 1330 | 14 |
| 683-55 | 583  | 298 | 1.96 | 0.0706 | 0.0033 | 1.485  | 0.0661 | 0.1526 | 0.0037 | 945  | 53 | 924  | 27 | 915  | 20 | 101.0 | 915  | 20 |
| 683-56 | 444  | 256 | 1.73 | 0.0721 | 0.0012 | 1.617  | 0.0281 | 0.1626 | 0.0021 | 990  | 17 | 977  | 11 | 971  | 12 | 100.6 | 971  | 12 |
| 683-57 | 303  | 270 | 1.12 | 0.0655 | 0.0010 | 1.146  | 0.0184 | 0.1269 | 0.0016 | 790  | 15 | 775  | 9  | 770  | 9  | 100.6 | 770  | 9  |
| 683-58 | 45   | 74  | 0.60 | 0.0840 | 0.0016 | 2.482  | 0.0481 | 0.2145 | 0.0029 | 1292 | 18 | 1267 | 14 | 1253 | 16 | 103.1 | 1292 | 18 |
| 683-59 | 77   | 127 | 0.61 | 0.0583 | 0.0012 | 0.6618 | 0.0136 | 0.0824 | 0.0011 | 540  | 23 | 516  | 8  | 510  | 7  | 101.2 | 510  | 7  |
| 683-60 | 54   | 50  | 1.09 | 0.1092 | 0.0031 | 4.821  | 0.1363 | 0.3203 | 0.0056 | 1786 | 27 | 1789 | 24 | 1791 | 27 | 99.7  | 1786 | 27 |
| 683-61 | 8    | 227 | 0.03 | 0.0748 | 0.0019 | 1.857  | 0.0470 | 0.1801 | 0.0026 | 1063 | 28 | 1066 | 17 | 1068 | 14 | 99.5  | 1063 | 28 |
| 683-62 | 138  | 161 | 0.85 | 0.0788 | 0.0015 | 2.124  | 0.0429 | 0.1955 | 0.0028 | 1166 | 19 | 1156 | 14 | 1151 | 15 | 101.3 | 1166 | 19 |
| 683-63 | 45   | 28  | 1.63 | 0.0661 | 0.0024 | 1.192  | 0.0421 | 0.1309 | 0.0022 | 809  | 46 | 797  | 19 | 793  | 13 | 100.5 | 793  | 13 |
| 683-64 | 187  | 209 | 0.90 | 0.0711 | 0.0011 | 1.610  | 0.0275 | 0.1643 | 0.0022 | 961  | 16 | 974  | 11 | 980  | 12 | 99.4  | 980  | 12 |
| 683-65 | 100  | 99  | 1.00 | 0.1203 | 0.0029 | 5.859  | 0.1398 | 0.3532 | 0.0052 | 1961 | 23 | 1955 | 21 | 1950 | 25 | 100.6 | 1961 | 23 |
| 683-66 | 367  | 600 | 0.61 | 0.0713 | 0.0010 | 1.571  | 0.0263 | 0.1599 | 0.0023 | 965  | 15 | 959  | 10 | 956  | 13 | 100.3 | 956  | 13 |
| 683-67 | 177  | 216 | 0.82 | 0.0561 | 0.0020 | 0.5499 | 0.0187 | 0.0712 | 0.0012 | 454  | 47 | 445  | 12 | 443  | 7  | 100.5 | 443  | 7  |
| 683-68 | 108  | 176 | 0.62 | 0.0598 | 0.0018 | 0.8162 | 0.0245 | 0.0990 | 0.0016 | 596  | 37 | 606  | 14 | 609  | 10 | 99.5  | 609  | 10 |
| 683-69 | 1312 | 967 | 1.36 | 0.0554 | 0.0007 | 0.6026 | 0.0087 | 0.0789 | 0.0011 | 430  | 14 | 479  | 6  | 489  | 6  | 98.0  | 489  | 6  |
| 683-70 | 223  | 162 | 1.38 | 0.1812 | 0.0023 | 12.823 | 0.1878 | 0.5135 | 0.0067 | 2664 | 11 | 2667 | 14 | 2671 | 28 | 99.7  | 2664 | 11 |
| 683-71 | 101  | 571 | 0.18 | 0.0738 | 0.0010 | 1.742  | 0.0287 | 0.1712 | 0.0025 | 1035 | 15 | 1024 | 11 | 1019 | 14 | 101.6 | 1035 | 15 |
| 683-72 | 206  | 201 | 1.02 | 0.0774 | 0.0011 | 2.055  | 0.0331 | 0.1927 | 0.0025 | 1131 | 15 | 1134 | 11 | 1136 | 14 | 99.6  | 1131 | 15 |
| 683-73 | 119  | 122 | 0.97 | 0.1909 | 0.0024 | 13.983 | 0.2099 | 0.5313 | 0.0073 | 2750 | 11 | 2749 | 14 | 2747 | 31 | 100.1 | 2750 | 11 |
| 683-74 | 159  | 607 | 0.26 | 0.1674 | 0.0020 | 11.128 | 0.1606 | 0.4824 | 0.0065 | 2532 | 11 | 2534 | 13 | 2537 | 28 | 99.8  | 2532 | 11 |
| 683-75 | 303  | 295 | 1.03 | 0.0559 | 0.0010 | 0.5132 | 0.0094 | 0.0666 | 0.0009 | 448  | 19 | 421  | 6  | 416  | 5  | 101.2 | 416  | 5  |
| 683-76 | 193  | 180 | 1.07 | 0.0569 | 0.0011 | 0.6403 | 0.0125 | 0.0816 | 0.0011 | 488  | 21 | 502  | 8  | 506  | 7  | 99.2  | 506  | 7  |
| 683-77 | 94   | 106 | 0.88 | 0.0878 | 0.0013 | 2.877  | 0.0467 | 0.2379 | 0.0033 | 1377 | 14 | 1376 | 12 | 1376 | 17 | 100.1 | 1377 | 14 |
| 683-78 | 515  | 197 | 2.62 | 0.0714 | 0.0010 | 1.630  | 0.0261 | 0.1656 | 0.0023 | 968  | 15 | 982  | 10 | 988  | 13 | 99.4  | 988  | 13 |
| 683-79 | 239  | 140 | 1.70 | 0.0649 | 0.0012 | 1.155  | 0.0222 | 0.1290 | 0.0018 | 771  | 19 | 780  | 10 | 782  | 10 | 99.7  | 782  | 10 |
| 683-80 | 136  | 142 | 0.96 | 0.1571 | 0.0022 | 9.893  | 0.1553 | 0.4570 | 0.0061 | 2425 | 12 | 2425 | 14 | 2426 | 27 | 100.0 | 2425 | 12 |
| 683-81 | 197  | 125 | 1.58 | 0.0769 | 0.0011 | 2.009  | 0.0333 | 0.1894 | 0.0027 | 1119 | 15 | 1118 | 11 | 1118 | 14 | 100.1 | 1119 | 15 |
| 683-82 | 520  | 448 | 1.16 | 0.0559 | 0.0010 | 0.5280 | 0.0100 | 0.0686 | 0.0009 | 448  | 20 | 430  | 7  | 427  | 6  | 100.7 | 427  | 6  |
| 683-83 | 393  | 217 | 1.82 | 0.0595 | 0.0013 | 0.7525 | 0.0165 | 0.0918 | 0.0013 | 584  | 24 | 570  | 10 | 568  | 8  | 100.7 | 568  | 8  |
| 683-84 | 37   | 65  | 0.57 | 0.1729 | 0.0065 | 11.514 | 0.4211 | 0.4848 | 0.0097 | 2586 | 35 | 2566 | 34 | 2548 | 42 | 101.5 | 2586 | 35 |
| 683-85 | 557  | 412 | 1.35 | 0.0563 | 0.0012 | 0.5603 | 0.0126 | 0.0722 | 0.0011 | 462  | 25 | 452  | 8  | 449  | 7  | 100.7 | 449  | 7  |
| 683-86 | 1374 | 848 | 1.62 | 0.0566 | 0.0008 | 0.5735 | 0.0093 | 0.0735 | 0.0010 | 476  | 16 | 460  | 6  | 457  | 6  | 100.7 | 457  | 6  |
| 683-87 | 277  | 158 | 1.76 | 0.0712 | 0.0011 | 1.599  | 0.0279 | 0.1629 | 0.0023 | 964  | 16 | 970  | 11 | 973  | 13 | 99.7  | 973  | 13 |
| 683-88 | 232  | 315 | 0.74 | 0.0757 | 0.0027 | 1.925  | 0.0689 | 0.1845 | 0.0032 | 1088 | 44 | 1090 | 24 | 1091 | 17 | 99.7  | 1088 | 44 |
| 683-89 | 234  | 160 | 1.47 | 0.0824 | 0.0012 | 2.440  | 0.0420 | 0.2149 | 0.0031 | 1254 | 15 | 1254 | 12 | 1255 | 16 | 99.9  | 1254 | 15 |

Sample 684, greywacke sandstone, Middle Devonian Saaremaa Formation in the Wuwamen area of STB, (Ma et al., 2012b, Precambrian Research)

|        |     |      |      |        |        |        |        |        |        |      |     |      |    |      |    |       |      |     |
|--------|-----|------|------|--------|--------|--------|--------|--------|--------|------|-----|------|----|------|----|-------|------|-----|
| 684-01 | 365 | 483  | 0.76 | 0.1822 | 0.0055 | 13.020 | 0.3985 | 0.5186 | 0.0087 | 2673 | 29  | 2681 | 29 | 2693 | 37 | 99.3  | 2673 | 29  |
| 684-02 | 425 | 495  | 0.86 | 0.0730 | 0.0020 | 1.730  | 0.0490 | 0.1720 | 0.0031 | 1014 | 30  | 1020 | 18 | 1023 | 17 | 99.1  | 1014 | 30  |
| 684-03 | 737 | 581  | 1.27 | 0.0735 | 0.0046 | 1.748  | 0.1071 | 0.1733 | 0.0044 | 1027 | 83  | 1026 | 40 | 1030 | 24 | 99.7  | 1027 | 83  |
| 684-04 | 259 | 299  | 0.87 | 0.2132 | 0.0084 | 16.805 | 0.6658 | 0.5721 | 0.0106 | 2930 | 40  | 2924 | 38 | 2916 | 43 | 100.5 | 2930 | 40  |
| 684-05 | 282 | 307  | 0.92 | 0.2160 | 0.0144 | 17.127 | 1.107  | 0.5756 | 0.0139 | 2951 | 73  | 2942 | 62 | 2931 | 57 | 100.7 | 2951 | 73  |
| 684-06 | 213 | 149  | 1.43 | 0.2825 | 0.0110 | 26.676 | 1.047  | 0.6862 | 0.0126 | 3377 | 38  | 3372 | 38 | 3368 | 48 | 100.3 | 3377 | 38  |
| 684-07 | 75  | 57   | 1.32 | 0.1026 | 0.0018 | 4.201  | 0.0773 | 0.2969 | 0.0041 | 1672 | 16  | 1674 | 15 | 1676 | 20 | 99.8  | 1672 | 16  |
| 684-08 | 63  | 58   | 1.09 | 0.0740 | 0.0018 | 1.606  | 0.0393 | 0.1575 | 0.0024 | 1040 | 26  | 973  | 15 | 943  | 13 | 103.2 | 943  | 13  |
| 684-09 | 515 | 1200 | 0.43 | 0.0673 | 0.0008 | 1.441  | 0.0214 | 0.1553 | 0.0021 | 846  | 14  | 906  | 9  | 931  | 12 | 97.3  | 931  | 12  |
| 684-10 | 415 | 433  | 0.96 | 0.0822 | 0.0013 | 2.430  | 0.0440 | 0.2144 | 0.0031 | 1251 | 16  | 1251 | 13 | 1252 | 16 | 99.9  | 1251 | 16  |
| 684-11 | 679 | 245  | 2.77 | 0.0683 | 0.0010 | 1.432  | 0.0231 | 0.1521 | 0.0021 | 876  | 15  | 902  | 10 | 913  | 12 | 98.8  | 913  | 12  |
| 684-12 | 80  | 74   | 1.09 | 0.0566 | 0.0014 | 0.6180 | 0.0152 | 0.0792 | 0.0012 | 478  | 29  | 489  | 10 | 491  | 7  | 99.6  | 491  | 7   |
| 684-13 | 70  | 74   | 0.95 | 0.1261 | 0.0016 | 6.266  | 0.0932 | 0.3604 | 0.0048 | 2044 | 12  | 2014 | 13 | 1984 | 23 | 103.0 | 2044 | 12  |
| 684-14 | 151 | 58   | 2.62 | 0.0641 | 0.0012 | 1.076  | 0.0216 | 0.1217 | 0.0017 | 746  | 21  | 741  | 11 | 740  | 10 | 100.1 | 740  | 10  |
| 684-15 | 152 | 192  | 0.79 | 0.1676 | 0.0033 | 11.036 | 0.2227 | 0.4780 | 0.0067 | 2534 | 17  | 2526 | 19 | 2519 | 29 | 100.6 | 2534 | 17  |
| 684-16 | 214 | 225  | 0.95 | 0.0779 | 0.0013 | 2.018  | 0.0358 | 0.1879 | 0.0025 | 1144 | 17  | 1122 | 12 | 1110 | 14 | 103.1 | 1144 | 17  |
| 684-17 | 18  | 15   | 1.18 | 0.0729 | 0.0078 | 1.703  | 0.1721 | 0.1696 | 0.0070 | 1011 | 139 | 1010 | 65 | 1010 | 38 | 100.1 | 1011 | 139 |
| 684-18 | 46  | 54   | 0.86 | 0.0584 | 0.0019 | 0.5723 | 0.0183 | 0.0711 | 0.0011 | 544  | 42  | 459  | 12 | 443  | 7  | 103.6 | 443  | 7   |
| 684-19 | 121 | 123  | 0.98 | 0.0734 | 0.0013 | 1.639  | 0.0305 | 0.1620 | 0.0023 | 1025 | 18  | 985  | 12 | 968  | 13 | 101.8 | 968  | 13  |
| 684-20 | 123 | 147  | 0.83 | 0.0728 | 0.0010 | 1.695  | 0.0275 | 0.1689 | 0.0024 | 1008 | 15  | 1007 | 10 | 1006 | 13 | 100.2 | 1008 | 15  |
| 684-21 | 89  | 378  | 0.24 | 0.0949 | 0.0012 | 3.487  | 0.0529 | 0.2666 | 0.0036 | 1525 | 13  | 1524 | 12 | 1523 | 18 | 100.1 | 1525 | 13  |
| 684-22 | 196 | 234  | 0.84 | 0.0685 | 0.0011 | 1.396  | 0.0247 | 0.1479 | 0.0020 | 883  | 17  | 887  | 10 | 889  | 11 | 99.8  | 889  | 11  |
| 684-23 | 56  | 39   | 1.46 | 0.1665 | 0.0098 | 11.206 | 0.6189 | 0.4870 | 0.0132 | 2523 | 57  | 2540 | 51 | 2558 | 57 | 98.6  | 2523 | 57  |
| 684-24 | 96  | 85   | 1.13 | 0.0914 | 0.0017 | 3.181  | 0.0602 | 0.2524 | 0.0035 | 1455 | 17  | 1453 | 15 | 1451 | 18 | 100.3 | 1455 | 17  |
| 684-25 | 37  | 44   | 0.83 | 0.1081 | 0.0024 | 4.703  | 0.1038 | 0.3154 | 0.0047 | 1768 | 20  | 1768 | 18 | 1767 | 23 | 100.1 | 1768 | 20  |
| 684-26 | 181 | 129  | 1.40 | 0.0723 | 0.0028 | 1.541  | 0.0570 | 0.1542 | 0.0027 | 996  | 47  | 947  | 23 | 925  | 15 | 102.4 | 925  | 15  |
| 684-27 | 238 | 36   | 6.64 | 0.1621 | 0.0029 | 10.389 | 0.1926 | 0.4648 | 0.0065 | 2478 | 15  | 2470 | 17 | 2461 | 29 | 100.7 | 2478 | 15  |
| 684-28 | 57  | 74   | 0.77 | 0.0749 | 0.0015 | 1.856  | 0.0378 | 0.1798 | 0.0025 | 1065 | 20  | 1065 | 13 | 1066 | 14 | 99.9  | 1065 | 20  |
| 684-29 | 724 | 415  | 1.75 | 0.0560 | 0.0009 | 0.5265 | 0.0091 | 0.0683 | 0.0009 | 451  | 18  | 430  | 6  | 426  | 5  | 100.9 | 426  | 5   |
| 684-30 | 955 | 267  | 3.58 | 0.0761 | 0.0011 | 1.881  | 0.0314 | 0.1793 | 0.0025 | 1097 | 15  | 1074 | 11 | 1063 | 13 | 103.2 | 1097 | 15  |
| 684-31 | 196 | 101  | 1.93 | 0.0580 | 0.0013 | 0.6422 | 0.0146 | 0.0803 | 0.0011 | 531  | 26  | 504  | 9  | 498  | 7  | 101.2 | 498  | 7   |
| 684-32 | 267 | 315  | 0.85 | 0.0671 | 0.0009 | 1.248  | 0.0197 | 0.1349 | 0.0018 | 841  | 15  | 822  | 9  | 815  | 10 | 100.9 | 815  | 10  |
| 684-33 | 91  | 181  | 0.50 | 0.0852 | 0.0014 | 2.640  | 0.0475 | 0.2248 | 0.0031 | 1319 | 16  | 1312 | 13 | 1307 | 16 | 100.9 | 1319 | 16  |
| 684-34 | 96  | 22   | 4.43 | 0.0731 | 0.0038 | 2.110  | 0.0977 | 0.1959 | 0.0044 | 1150 | 57  | 1152 | 32 | 1153 | 24 | 99.7  | 1150 | 57  |
| 684-35 | 258 | 478  | 0.54 | 0.0717 | 0.0013 | 1.548  | 0.0295 | 0.1565 | 0.0022 | 979  | 19  | 950  | 12 | 937  | 12 | 101.4 | 937  | 12  |
| 684-36 | 98  | 67   | 1.46 | 0.0992 | 0.0016 | 3.880  | 0.0694 | 0.2836 | 0.0040 | 1610 | 15  | 1609 | 14 | 1609 | 20 | 100.1 | 1610 | 15  |
| 684-37 | 51  | 53   | 0.95 | 0.2005 | 0.0072 | 14.681 | 0.5202 | 0.5312 | 0.0102 | 2830 | 33  | 2795 | 34 | 2747 | 43 | 103.0 | 2830 | 33  |
| 684-38 | 368 | 70   | 5.26 | 0.1476 | 0.0020 | 8.777  | 0.1378 | 0.4313 | 0.0060 | 2318 | 12  | 2315 | 14 | 2311 | 27 | 100.3 | 2318 | 12  |
| 684-39 | 137 | 92   | 1.50 | 0.0703 | 0.0012 | 1.543  | 0.0296 | 0.1591 | 0.0023 | 938  | 18  | 948  | 12 | 952  | 13 | 99.6  | 952  | 13  |
| 684-40 | 292 | 301  | 0.97 | 0.0560 | 0.0012 | 0.5518 | 0.0121 | 0.0714 | 0.0010 | 453  | 25  | 446  | 8  | 445  | 6  | 100.2 | 445  | 6   |
| 684-41 | 37  | 28   | 1.33 | 0.1143 | 0.0020 | 5.267  | 0.0981 | 0.3344 | 0.0049 | 1868 | 15  | 1864 | 16 | 1860 | 24 | 100.4 | 1868 | 15  |
| 684-42 | 191 | 282  | 0.68 | 0.0872 | 0.0013 | 2.870  | 0.0476 | 0.2386 | 0.0034 | 1366 | 14  | 1374 | 12 | 1379 | 18 | 99.1  | 1366 | 14  |
| 684-43 | 519 | 268  | 1.94 | 0.0765 | 0.0011 | 2.080  | 0.0354 | 0.1972 | 0.0029 | 1109 | 15  | 1142 | 12 | 1160 | 16 | 95.6  | 1109 | 15  |
| 684-44 | 287 | 159  | 1.80 | 0.1811 | 0.0027 | 12.655 | 0.2087 | 0.5069 | 0.0069 | 2663 | 12  | 2654 | 16 | 2643 | 30 | 100.8 | 2663 | 12  |
| 684-45 | 48  | 38   | 1.26 | 0.1980 | 0.0031 | 14.721 | 0.2532 | 0.5392 | 0.0077 | 2810 | 13  | 2797 | 16 | 2780 | 32 | 101.1 | 2810 | 13  |
| 684-46 | 361 | 528  | 0.68 | 0.0714 | 0.0009 | 1.626  | 0.0246 | 0.1653 | 0.0022 | 967  | 14  | 980  | 10 | 986  | 12 | 99.4  | 967  | 14  |
| 684-47 | 91  | 848  | 0.11 | 0.0678 | 0.0009 | 1.359  | 0.0217 | 0.1454 | 0.0020 | 862  | 15  | 871  | 9  | 875  | 11 | 99.5  | 875  | 11  |
| 684-48 | 77  | 99   | 0.78 | 0.1153 | 0.0016 | 5.510  | 0.0890 | 0.3467 | 0.0048 | 1884 | 13  | 1902 | 14 | 1919 | 23 | 98.2  | 1884 | 13  |
| 684-49 | 251 | 234  | 1.07 | 0.1127 | 0.0019 | 5.039  | 0.0907 | 0.3242 | 0.0045 | 1844 | 15  | 1826 | 15 | 1810 | 22 | 101.9 | 1844 | 15  |
| 684-50 | 117 | 70   | 1.67 | 0.0690 | 0.0015 | 1.361  | 0.0307 | 0.1431 | 0.0021 | 897  | 24  | 872  | 13 | 862  | 12 | 101.2 | 862  | 12  |
| 684-51 | 160 | 468  | 0.34 | 0.1091 | 0.0017 | 4.716  | 0.0803 | 0.3138 | 0.0043 | 1784 | 14  | 1770 | 14 | 1759 | 21 | 101.4 | 1784 | 14  |
| 684-52 | 177 | 158  | 1.12 | 0.1131 | 0.0023 | 5.164  | 0.1093 | 0.3310 | 0.0051 | 1849 | 18  | 1847 | 18 | 1843 | 24 | 100.3 | 1849 | 18  |
| 684-53 | 80  | 294  | 0.27 | 0.0618 | 0.0009 | 0.9488 | 0.0159 | 0.1113 | 0.0016 | 668  | 16  | 677  | 8  | 680  | 9  | 99.6  | 680  | 9   |
| 684-54 | 181 | 225  | 0.80 | 0.1616 | 0.0028 | 10.223 | 0.1899 | 0.4588 | 0.0065 | 2473 | 15  | 2455 | 17 | 2434 | 29 | 101.6 | 2473 | 15  |
| 684-55 | 205 | 114  | 1.79 | 0.1463 | 0.0048 | 8.605  | 0.2744 | 0.4269 | 0.0077 | 2303 | 31  | 2297 | 29 | 2282 | 35 | 100.5 | 2303 | 31  |
| 684-56 | 255 | 130  | 1.96 | 0.0572 | 0.0014 | 0.5996 | 0.0147 | 0.0760 | 0.0011 | 500  | 29  | 477  | 9  | 472  | 7  | 101.1 | 472  | 7   |
| 684-57 | 133 | 353  | 0.38 | 0.0994 | 0.0025 | 3.800  | 0.0986 | 0.2780 | 0.0044 | 1613 | 26  | 1593 | 21 | 1581 | 22 | 102.0 | 1613 | 26  |
| 684-58 | 93  | 64   | 1.45 | 0.1370 | 0.0025 | 7.536  | 0.1444 | 0.3993 | 0.0058 | 2189 | 16  | 2177 | 17 | 2166 | 27 | 101.1 | 2189 | 16  |
| 684-59 | 71  | 303  | 0.23 | 0.1072 | 0.0061 | 4.530  | 0.2486 | 0.3070 | 0.0073 | 1753 | 66  | 1737 | 46 | 1726 | 36 | 101.6 | 1753 | 66  |
| 684-60 | 448 | 315  | 1.42 | 0.0731 | 0.0011 | 1.756  | 0.0303 | 0.1743 | 0.0025 | 1016 | 16  | 1029 | 11 | 1036 | 14 | 98.1  | 1016 | 16  |
| 684-61 | 237 | 311  | 0.76 | 0.0733 | 0.0021 | 1.746  | 0.0490 | 0.1726 | 0.0027 | 1023 | 32  | 1026 | 18 | 1027 | 15 | 99.6  | 1023 | 32  |
| 684-62 | 102 | 228  | 0.45 | 0.0585 | 0.0026 | 0.7004 | 0.0306 | 0.0869 | 0.0017 | 548  | 61  | 539  | 18 | 537  | 10 | 100.4 | 537  | 10  |
| 684-63 | 49  | 52   | 0.93 | 0.0666 | 0.0027 | 1.243  | 0.0482 | 0.1355 | 0.0026 | 824  | 50  | 820  | 22 | 819  | 15 | 100.1 | 819  | 15  |
| 684-64 | 154 | 166  | 0.93 | 0.1067 | 0.0023 | 4.571  | 0.1081 | 0.3110 | 0.0055 | 1743 | 20  | 1744 | 20 | 1746 | 27 | 99.8  | 1743 | 20  |
| 684-65 | 43  | 51   | 0.85 | 0.0723 | 0.0020 | 1.602  | 0.0446 | 0.1607 | 0.0027 | 995  | 31  | 971  | 17 | 961  | 15 | 101.0 | 961  | 15  |
| 684-66 | 8   | 146  | 0.06 | 0.1092 | 0.0014 | 4.765  | 0.0758 | 0.3165 | 0.0046 | 1787 | 13  | 1779 | 13 | 1772 | 22 | 100.8 | 1787 | 13  |
| 684-67 | 44  | 23   | 1.92 | 0.1111 | 0.0051 | 4.986  | 0.2170 | 0.3257 | 0.0080 | 1817 | 45  | 1817 | 37 | 1817 | 39 | 100.0 | 1817 | 45  |
| 684-68 | 133 | 174  | 0.77 | 0.0706 | 0.0010 | 1.598  | 0.0272 | 0.1643 | 0.0024 | 945  | 16  | 970  | 11 | 981  | 13 | 98.9  | 981  | 13  |
| 684-69 | 629 | 424  | 1.48 | 0.0557 | 0.0009 | 0.5573 | 0.0101 | 0.0726 | 0.0011 | 440  | 19  | 450  | 7  | 452  | 6  | 99.6  | 452  | 6   |
| 684-70 | 219 | 224  | 0.98 | 0.0643 | 0.0010 | 1.082  | 0.0188 | 0.1221 | 0.0017 | 751  | 17  | 744  | 9  | 742  | 10 | 100.3 | 742  | 10  |
| 684-71 | 348 | 315  | 1.11 |        |        |        |        |        |        |      |     |      |    |      |    |       |      |     |



|        |     |      |      |        |        |        |        |        |        |      |    |      |    |      |    |       |            |    |
|--------|-----|------|------|--------|--------|--------|--------|--------|--------|------|----|------|----|------|----|-------|------------|----|
| 684-75 | 388 | 132  | 2.94 | 0.0979 | 0.0013 | 3.812  | 0.0606 | 0.2824 | 0.0040 | 1585 | 13 | 1595 | 13 | 1603 | 20 | 98.9  | 1585       | 13 |
| 684-76 | 264 | 208  | 1.27 | 0.0548 | 0.0013 | 0.5740 | 0.0143 | 0.0761 | 0.0012 | 402  | 29 | 461  | 9  | 473  | 7  | 97.5  | 473        | 7  |
| 684-77 | 291 | 145  | 2.01 | 0.0638 | 0.0012 | 1.091  | 0.0214 | 0.1240 | 0.0018 | 735  | 20 | 749  | 10 | 753  | 10 | 99.5  | 753        | 10 |
| 684-78 | 685 | 954  | 0.73 | 0.0641 | 0.0010 | 1.150  | 0.0198 | 0.1302 | 0.0019 | 743  | 16 | 777  | 9  | 789  | 11 | 98.5  | 789        | 11 |
| 684-79 | 221 | 721  | 0.31 | 0.1355 | 0.0062 | 7.466  | 0.3359 | 0.3996 | 0.0094 | 2171 | 46 | 2169 | 40 | 2167 | 43 | 100.2 | 2171       | 46 |
| 684-80 | 179 | 350  | 0.51 | 0.1918 | 0.0052 | 13.996 | 0.3929 | 0.5304 | 0.0090 | 2757 | 25 | 2749 | 27 | 2743 | 38 | 100.5 | 2757       | 25 |
| 684-81 | 9   | 181  | 0.05 | 0.0785 | 0.0017 | 2.253  | 0.0505 | 0.2082 | 0.0032 | 1160 | 22 | 1198 | 16 | 1219 | 17 | 95.2  | 1160       | 22 |
| 684-82 | 282 | 506  | 0.56 | 0.0583 | 0.0015 | 0.6444 | 0.0164 | 0.0803 | 0.0012 | 541  | 30 | 505  | 10 | 498  | 7  | 101.4 | 498        | 7  |
| 685-01 | 170 | 152  | 1.12 | 0.1108 | 0.0022 | 4.844  | 0.1039 | 0.3170 | 0.0049 | 1812 | 19 | 1793 | 18 | 1775 | 24 | 102.1 | 1812       | 19 |
| 685-02 | 266 | 196  | 1.36 | 0.1109 | 0.0023 | 4.935  | 0.1092 | 0.3227 | 0.0050 | 1814 | 20 | 1808 | 19 | 1803 | 24 | 100.6 | 1814       | 20 |
| 685-03 | 244 | 261  | 0.93 | 0.1143 | 0.0034 | 5.333  | 0.1654 | 0.3383 | 0.0058 | 1869 | 32 | 1874 | 27 | 1879 | 28 | 99.5  | 1869       | 32 |
| 685-04 | 165 | 445  | 0.37 | 0.1597 | 0.0039 | 9.973  | 0.2555 | 0.4529 | 0.0072 | 2453 | 23 | 2432 | 24 | 2408 | 32 | 101.9 | 2453       | 23 |
| 685-05 | 286 | 258  | 1.11 | 0.1569 | 0.0069 | 9.600  | 0.4182 | 0.4441 | 0.0091 | 2423 | 46 | 2397 | 40 | 2369 | 41 | 102.3 | 2423       | 46 |
| 685-06 | 141 | 163  | 0.87 | 0.2859 | 0.0129 | 27.341 | 1.189  | 0.6940 | 0.0150 | 3390 | 28 | 3391 | 33 | 3395 | 47 | 99.9  | 3390       | 28 |
| 685-07 | 251 | 186  | 1.35 | 0.1143 | 0.0042 | 5.404  | 0.1942 | 0.3438 | 0.0064 | 1869 | 39 | 1885 | 31 | 1905 | 30 | 98.1  | 1869       | 39 |
| 685-08 | 412 | 255  | 1.62 | 0.0982 | 0.0039 | 3.894  | 0.1538 | 0.2877 | 0.0055 | 1591 | 46 | 1612 | 32 | 1630 | 27 | 97.6  | 1591       | 46 |
| 685-09 | 206 | 226  | 0.91 | 0.0970 | 0.0047 | 3.886  | 0.1850 | 0.2915 | 0.0068 | 1568 | 55 | 1611 | 38 | 1649 | 34 | 95.1  | 1568       | 55 |
| 685-10 | 55  | 1581 | 0.03 | 0.1777 | 0.0074 | 12.319 | 0.5258 | 0.5033 | 0.0099 | 2631 | 45 | 2629 | 40 | 2628 | 42 | 100.1 | 2631       | 45 |
| 685-11 | 474 | 382  | 1.24 | 0.1131 | 0.0043 | 4.662  | 0.1793 | 0.2993 | 0.0057 | 1850 | 42 | 1760 | 32 | 1688 | 28 | 109.6 | 1850       | 42 |
| 685-12 | 96  | 82   | 1.17 | 0.0965 | 0.0039 | 3.804  | 0.1525 | 0.2860 | 0.0056 | 1558 | 46 | 1594 | 32 | 1621 | 28 | 96.1  | 1558       | 46 |
| 685-13 | 306 | 173  | 1.77 | 0.1617 | 0.0043 | 10.112 | 0.2759 | 0.4553 | 0.0077 | 2474 | 24 | 2445 | 25 | 2419 | 34 | 102.3 | 2474       | 24 |
| 685-14 | 81  | 670  | 0.12 | 0.0966 | 0.0032 | 3.432  | 0.1123 | 0.2589 | 0.0044 | 1558 | 36 | 1512 | 26 | 1484 | 23 | 105.0 | 1558       | 36 |
| 685-15 | 366 | 331  | 1.11 | 0.0563 | 0.0010 | 0.5973 | 0.0114 | 0.0770 | 0.0011 | 463  | 20 | 476  | 7  | 478  | 7  | 99.6  | 478        | 7  |
| 685-16 | 146 | 145  | 0.01 | 0.0565 | 0.0013 | 0.5882 | 0.0141 | 0.0755 | 0.0011 | 473  | 28 | 470  | 9  | 469  | 7  | 100.2 | 469        | 7  |
| 685-17 | 67  | 110  | 0.61 | 0.1137 | 0.0015 | 5.267  | 0.0805 | 0.3361 | 0.0046 | 1859 | 12 | 1864 | 13 | 1868 | 22 | 99.5  | 1859       | 12 |
| 685-18 | 82  | 142  | 0.58 | 0.0744 | 0.0018 | 1.828  | 0.0439 | 0.1783 | 0.0028 | 1053 | 25 | 1055 | 16 | 1058 | 15 | 99.5  | 1053       | 25 |
| 685-19 | 64  | 112  | 0.58 | 0.1611 | 0.0045 | 10.243 | 0.2831 | 0.4613 | 0.0075 | 2468 | 26 | 2457 | 26 | 2445 | 33 | 100.9 | 2468       | 26 |
| 685-20 | 255 | 166  | 1.54 | 0.0952 | 0.0014 | 3.526  | 0.0570 | 0.2686 | 0.0037 | 1532 | 14 | 1533 | 13 | 1534 | 19 | 99.9  | 1532       | 14 |
| 685-21 | 287 | 109  | 2.64 | 0.0716 | 0.0013 | 1.651  | 0.0324 | 0.1672 | 0.0024 | 974  | 19 | 990  | 12 | 997  | 13 | 99.3  | 997        | 13 |
| 685-22 | 75  | 104  | 0.72 | 0.0670 | 0.0012 | 1.247  | 0.0243 | 0.1350 | 0.0019 | 837  | 20 | 822  | 11 | 816  | 11 | 100.7 | 837        | 20 |
| 685-23 | 94  | 424  | 0.22 | 0.0670 | 0.0009 | 1.293  | 0.0204 | 0.1400 | 0.0019 | 837  | 15 | 843  | 9  | 845  | 11 | 99.8  | 845        | 11 |
| 685-24 | 575 | 323  | 1.78 | 0.0561 | 0.0008 | 0.5846 | 0.0099 | 0.0757 | 0.0010 | 456  | 17 | 467  | 6  | 470  | 6  | 99.4  | 470        | 6  |
| 685-25 | 128 | 540  | 0.24 | 0.0693 | 0.0009 | 1.297  | 0.0194 | 0.1359 | 0.0018 | 906  | 14 | 844  | 9  | 821  | 10 | 102.8 | 821        | 10 |
| 685-26 | 25  | 27   | 0.91 | 0.0631 | 0.0023 | 0.9578 | 0.0342 | 0.1102 | 0.0019 | 710  | 47 | 682  | 18 | 674  | 11 | 101.2 | 674        | 11 |
| 685-27 | 185 | 251  | 0.74 | 0.0554 | 0.0009 | 0.5605 | 0.0100 | 0.0734 | 0.0010 | 427  | 19 | 452  | 7  | 457  | 6  | 98.9  | 457        | 6  |
| 685-28 | 119 | 279  | 0.43 | 0.0742 | 0.0010 | 1.806  | 0.0279 | 0.1765 | 0.0023 | 1048 | 14 | 1048 | 10 | 1048 | 13 | 100.0 | 1048       | 14 |
| 685-29 | 90  | 337  | 0.27 | 0.0701 | 0.0012 | 1.618  | 0.0289 | 0.1674 | 0.0023 | 931  | 17 | 977  | 11 | 998  | 12 | 97.9  | 998        | 12 |
| 685-30 | 35  | 258  | 0.13 | 0.0718 | 0.0010 | 1.584  | 0.0254 | 0.1602 | 0.0022 | 979  | 15 | 964  | 10 | 958  | 12 | 100.6 | 958        | 12 |
| 685-31 | 882 | 323  | 2.73 | 0.0597 | 0.0012 | 0.7859 | 0.0160 | 0.0955 | 0.0014 | 592  | 22 | 589  | 9  | 588  | 8  | 100.2 | 588        | 8  |
| 685-32 | 27  | 84   | 0.32 | 0.0713 | 0.0012 | 1.534  | 0.0286 | 0.1562 | 0.0022 | 965  | 18 | 944  | 11 | 936  | 12 | 100.9 | 936        | 12 |
| 685-33 | 231 | 1443 | 0.16 | 0.0607 | 0.0011 | 0.9213 | 0.0196 | 0.1102 | 0.0018 | 628  | 22 | 663  | 10 | 674  | 10 | 98.4  | 674        | 10 |
| 685-34 | 728 | 745  | 0.98 | 0.0600 | 0.0008 | 0.8505 | 0.0131 | 0.1029 | 0.0015 | 602  | 15 | 625  | 7  | 631  | 9  | 99.0  | 631        | 9  |
| 685-35 | 182 | 197  | 0.93 | 0.0564 | 0.0010 | 0.5677 | 0.0109 | 0.0731 | 0.0010 | 466  | 20 | 457  | 7  | 455  | 6  | 100.4 | 455        | 6  |
| 685-36 | 118 | 78   | 1.52 | 0.1946 | 0.0024 | 14.419 | 0.2186 | 0.5375 | 0.0077 | 2782 | 11 | 2778 | 14 | 2773 | 32 | 100.3 | 2782       | 11 |
| 685-37 | 204 | 99   | 2.07 | 0.1628 | 0.0023 | 10.193 | 0.1633 | 0.4542 | 0.0062 | 2484 | 12 | 2452 | 15 | 2414 | 27 | 102.9 | 2484       | 12 |
| 685-38 | 332 | 222  | 1.49 | 0.0894 | 0.0014 | 2.977  | 0.0502 | 0.2415 | 0.0034 | 1413 | 15 | 1402 | 13 | 1395 | 17 | 101.3 | 1413       | 15 |
| 685-39 | 237 | 157  | 1.51 | 0.1599 | 0.0026 | 10.112 | 0.1773 | 0.4586 | 0.0064 | 2455 | 14 | 2445 | 16 | 2433 | 28 | 100.9 | 2455       | 14 |
| 685-40 | 156 | 193  | 0.81 | 0.0546 | 0.0012 | 0.5590 | 0.0125 | 0.0743 | 0.0011 | 396  | 25 | 451  | 8  | 462  | 7  | 97.6  | 462        | 7  |
| 685-41 | 222 | 219  | 1.01 | 0.0561 | 0.0011 | 0.5860 | 0.0118 | 0.0757 | 0.0011 | 458  | 22 | 468  | 8  | 470  | 7  | 99.6  | 470        | 7  |
| 685-42 | 111 | 64   | 1.75 | 0.0903 | 0.0023 | 3.078  | 0.0776 | 0.2472 | 0.0039 | 1432 | 25 | 1427 | 19 | 1424 | 20 | 100.6 | 1432       | 25 |
| 685-43 | 101 | 133  | 0.76 | 0.0716 | 0.0012 | 1.635  | 0.0301 | 0.1657 | 0.0024 | 974  | 17 | 984  | 12 | 988  | 13 | 99.6  | 988        | 13 |
| 685-44 | 94  | 34   | 2.79 | 0.0645 | 0.0024 | 0.9515 | 0.0353 | 0.1070 | 0.0019 | 759  | 48 | 679  | 18 | 655  | 11 | 103.7 | 655        | 11 |
| 685-45 | 748 | 268  | 2.79 | 0.0726 | 0.0011 | 1.686  | 0.0290 | 0.1685 | 0.0023 | 1003 | 16 | 1003 | 11 | 1004 | 13 | 99.9  | 1003       | 16 |
| 685-46 | 161 | 193  | 0.84 | 0.0574 | 0.0014 | 0.5883 | 0.0145 | 0.0743 | 0.0011 | 508  | 29 | 470  | 9  | 462  | 7  | 101.7 | 462        | 7  |
| 685-47 | 309 | 376  | 0.82 | 0.0959 | 0.0012 | 3.557  | 0.0536 | 0.2691 | 0.0038 | 1546 | 13 | 1540 | 12 | 1536 | 19 | 100.7 | 1546       | 13 |
| 685-48 | 178 | 214  | 0.83 | 0.0559 | 0.0012 | 0.5180 | 0.0116 | 0.0672 | 0.0009 | 448  | 26 | 424  | 8  | 419  | 6  | 101.2 | 419        | 6  |
| 685-49 | 232 | 150  | 1.55 | 0.0559 | 0.0015 | 0.5227 | 0.0137 | 0.0678 | 0.0010 | 449  | 33 | 427  | 9  | 423  | 6  | 100.9 | 423        | 6  |
| 685-50 | 0   | 1305 |      | 0.1223 | 0.0031 | 1.808  | 0.0610 | 0.1068 | 0.0016 | 1990 | 39 | 1049 | 22 | 654  | 9  | 160.4 | Discordant |    |
| 685-51 | 162 | 204  | 0.79 | 0.0994 | 0.0019 | 3.821  | 0.0707 | 0.2812 | 0.0036 | 1613 | 17 | 1597 | 15 | 1597 | 18 | 101.0 | 1613       | 17 |
| 685-52 | 104 | 184  | 0.56 | 0.0705 | 0.0011 | 1.551  | 0.0228 | 0.1596 | 0.0014 | 943  | 16 | 951  | 9  | 954  | 8  | 99.7  | 954        | 8  |
| 685-53 | 109 | 69   | 1.59 | 0.0661 | 0.0032 | 1.229  | 0.0654 | 0.1339 | 0.0018 | 809  | 89 | 814  | 30 | 810  | 10 | 100.5 | 810        | 10 |
| 685-54 | 69  | 407  | 0.17 | 0.1029 | 0.0009 | 4.428  | 0.1125 | 0.3093 | 0.0064 | 1677 | 21 | 1718 | 21 | 1737 | 32 | 96.5  | 1677       | 21 |
| 685-55 | 557 | 534  | 1.04 | 0.0713 | 0.0007 | 1.534  | 0.0316 | 0.1555 | 0.0026 | 966  | 19 | 944  | 13 | 932  | 15 | 101.3 | 932        | 15 |
| 685-56 | 20  | 101  | 0.19 | 0.2251 | 0.0053 | 20.196 | 0.8615 | 0.6181 | 0.0157 | 3017 | 37 | 3101 | 41 | 3102 | 63 | 97.3  | 3017       | 37 |
| 685-57 | 75  | 112  | 0.67 | 0.0726 | 0.0010 | 1.669  | 0.0226 | 0.1665 | 0.0008 | 1003 | 20 | 997  | 9  | 993  | 4  | 100.4 | 993        | 4  |
| 685-58 | 119 | 68   | 1.75 | 0.0573 | 0.0014 | 0.6939 | 0.0166 | 0.0883 | 0.0007 | 502  | 39 | 535  | 10 | 545  | 4  | 98.2  | 545        | 4  |
| 685-59 | 158 | 304  | 0.52 | 0.0555 | 0.0017 | 0.5273 | 0.0165 | 0.0688 | 0.0005 | 430  | 57 | 430  | 11 | 429  | 3  | 100.2 | 429        | 3  |
| 685-60 | 102 | 114  | 0.89 | 0.1277 | 0.0009 | 7.176  | 0.0584 | 0.4068 | 0.0025 | 2066 | 7  | 2133 | 7  | 2200 | 11 | 93.9  | 2066       | 7  |
| 685-61 | 55  | 76   | 0.72 | 0.1086 | 0.0011 | 4.806  | 0.0564 | 0.3209 | 0.0028 | 1777 | 10 | 1786 | 10 | 1794 | 13 | 99.1  | 1777       | 10 |
| 685-62 | 92  | 183  | 0.50 | 0.0728 | 0.0013 | 1.704  | 0.0269 | 0.1699 | 0.0014 | 1007 | 19 | 1010 | 10 | 1011 | 7  | 99.6  | 1007       |    |

|           |     |     |      |        |        |        |        |        |        |      |     |      |    |      |    |       |            |    |
|-----------|-----|-----|------|--------|--------|--------|--------|--------|--------|------|-----|------|----|------|----|-------|------------|----|
| LT42C-033 | 166 | 245 | 0.67 | 0.0607 | 0.0017 | 0.6320 | 0.0180 | 0.0755 | 0.0011 | 628  | 60  | 497  | 11 | 469  | 6  | 106.0 | 469        | 6  |
| LT42C-034 | 93  | 111 | 0.83 | 0.0970 | 0.0022 | 3.701  | 0.0850 | 0.2768 | 0.0038 | 1566 | 41  | 1572 | 18 | 1575 | 19 | 99.4  | 1566       | 41 |
| LT42C-035 | 159 | 234 | 0.68 | 0.0561 | 0.0017 | 0.5150 | 0.0160 | 0.0665 | 0.0009 | 458  | 66  | 422  | 10 | 415  | 6  | 101.7 | 415        | 6  |
| LT42C-036 | 154 | 270 | 0.57 | 0.0573 | 0.0017 | 0.5400 | 0.0160 | 0.0684 | 0.0010 | 502  | 66  | 439  | 11 | 427  | 6  | 102.8 | 427        | 6  |
| LT42C-037 | 181 | 153 | 1.18 | 0.0722 | 0.0018 | 1.598  | 0.0410 | 0.1604 | 0.0022 | 992  | 51  | 969  | 16 | 959  | 12 | 101.0 | 959        | 12 |
| LT42C-038 | 239 | 668 | 0.36 | 0.0577 | 0.0013 | 0.6080 | 0.0140 | 0.0765 | 0.0010 | 518  | 49  | 482  | 9  | 475  | 6  | 101.5 | 475        | 6  |
| LT42C-039 | 76  | 147 | 0.52 | 0.0596 | 0.0022 | 0.5450 | 0.0200 | 0.0663 | 0.0010 | 588  | 77  | 442  | 13 | 414  | 6  | 106.8 | 414        | 6  |
| LT42C-040 | 254 | 348 | 0.73 | 0.0817 | 0.0017 | 2.086  | 0.0450 | 0.1850 | 0.0025 | 1239 | 41  | 1144 | 15 | 1094 | 13 | 113.3 | Discordant |    |
| LT42C-041 | 151 | 240 | 0.63 | 0.0543 | 0.0017 | 0.5120 | 0.0160 | 0.0683 | 0.0010 | 384  | 68  | 420  | 11 | 426  | 6  | 98.6  | 426        | 6  |
| LT42C-042 | 56  | 525 | 0.11 | 0.0669 | 0.0014 | 1.287  | 0.0280 | 0.1395 | 0.0019 | 834  | 44  | 840  | 13 | 842  | 10 | 99.8  | 842        | 10 |
| LT42C-043 | 57  | 100 | 0.57 | 0.0638 | 0.0020 | 1.182  | 0.0380 | 0.1344 | 0.0020 | 733  | 66  | 792  | 17 | 813  | 11 | 97.4  | 813        | 11 |
| LT42C-044 | 156 | 266 | 0.58 | 0.0592 | 0.0018 | 0.5610 | 0.0170 | 0.0687 | 0.0010 | 573  | 64  | 452  | 11 | 428  | 6  | 105.6 | 428        | 6  |
| LT42C-045 | 158 | 225 | 0.70 | 0.0578 | 0.0018 | 0.5660 | 0.0180 | 0.0710 | 0.0010 | 522  | 68  | 455  | 12 | 442  | 6  | 102.9 | 442        | 6  |
| LT42C-046 | 177 | 263 | 0.67 | 0.0541 | 0.0017 | 0.4950 | 0.0150 | 0.0664 | 0.0009 | 376  | 68  | 409  | 10 | 414  | 6  | 98.8  | 414        | 6  |
| LT42C-047 | 152 | 285 | 0.53 | 0.0573 | 0.0017 | 0.5210 | 0.0160 | 0.0660 | 0.0009 | 503  | 65  | 426  | 10 | 412  | 6  | 103.4 | 412        | 6  |
| LT42C-048 | 369 | 222 | 1.66 | 0.1644 | 0.0034 | 10.677 | 0.2270 | 0.4709 | 0.0063 | 2501 | 34  | 2495 | 20 | 2488 | 28 | 100.5 | 2501       | 34 |
| LT42C-049 | 97  | 144 | 0.67 | 0.0575 | 0.0021 | 0.5700 | 0.0210 | 0.0719 | 0.0011 | 512  | 79  | 458  | 13 | 448  | 6  | 102.2 | 448        | 6  |
| LT42C-050 | 72  | 150 | 0.48 | 0.0571 | 0.0021 | 0.5390 | 0.0200 | 0.0685 | 0.0010 | 495  | 79  | 438  | 13 | 427  | 6  | 102.6 | 427        | 6  |
| LT42C-051 | 373 | 775 | 0.48 | 0.0571 | 0.0014 | 0.5770 | 0.0140 | 0.0733 | 0.0010 | 495  | 53  | 462  | 9  | 456  | 6  | 101.3 | 456        | 6  |
| LT42C-052 | 55  | 89  | 0.62 | 0.0533 | 0.0024 | 0.5080 | 0.0230 | 0.0691 | 0.0011 | 342  | 101 | 417  | 15 | 431  | 7  | 96.8  | 431        | 7  |
| LT42C-053 | 125 | 181 | 0.69 | 0.0560 | 0.0020 | 0.5160 | 0.0180 | 0.0669 | 0.0010 | 452  | 76  | 423  | 12 | 417  | 6  | 101.4 | 417        | 6  |
| LT42C-054 | 82  | 171 | 0.48 | 0.0530 | 0.0018 | 0.5620 | 0.0190 | 0.0770 | 0.0011 | 328  | 77  | 453  | 13 | 478  | 7  | 94.8  | 478        | 7  |
| LT42C-055 | 167 | 204 | 0.82 | 0.1327 | 0.0029 | 7.308  | 0.1640 | 0.3992 | 0.0054 | 2135 | 38  | 2150 | 20 | 2165 | 25 | 98.6  | 2135       | 38 |
| LT42C-056 | 83  | 154 | 0.54 | 0.0565 | 0.0021 | 0.5180 | 0.0190 | 0.0664 | 0.0010 | 474  | 81  | 424  | 13 | 414  | 6  | 102.4 | 414        | 6  |
| LT42C-057 | 142 | 200 | 0.71 | 0.0558 | 0.0019 | 0.5190 | 0.0180 | 0.0674 | 0.0010 | 445  | 75  | 424  | 12 | 420  | 6  | 101.0 | 420        | 6  |
| LT42C-058 | 21  | 59  | 0.36 | 0.0735 | 0.0027 | 1.577  | 0.0570 | 0.1556 | 0.0025 | 1027 | 73  | 961  | 23 | 932  | 14 | 103.1 | 932        | 14 |
| LT42C-059 | 117 | 150 | 0.78 | 0.1675 | 0.0038 | 10.811 | 0.2500 | 0.4681 | 0.0065 | 2533 | 36  | 2507 | 21 | 2475 | 28 | 102.3 | 2533       | 36 |
| LT42C-060 | 209 | 287 | 0.73 | 0.0592 | 0.0018 | 0.5400 | 0.0170 | 0.0661 | 0.0010 | 575  | 63  | 438  | 11 | 412  | 6  | 106.3 | 412        | 6  |
| LT42C-061 | 86  | 68  | 1.27 | 0.1672 | 0.0041 | 10.758 | 0.2670 | 0.4666 | 0.0068 | 2530 | 39  | 2502 | 23 | 2469 | 30 | 102.5 | 2530       | 39 |
| LT42C-062 | 168 | 252 | 0.67 | 0.0553 | 0.0018 | 0.5340 | 0.0170 | 0.0701 | 0.0010 | 422  | 68  | 434  | 11 | 436  | 6  | 99.5  | 436        | 6  |
| LT42C-063 | 184 | 329 | 0.56 | 0.0564 | 0.0017 | 0.5140 | 0.0160 | 0.0661 | 0.0010 | 466  | 64  | 421  | 10 | 413  | 6  | 101.9 | 413        | 6  |
| LT42C-064 | 42  | 54  | 0.77 | 0.0538 | 0.0032 | 0.5570 | 0.0320 | 0.0751 | 0.0014 | 361  | 127 | 450  | 21 | 467  | 8  | 96.4  | 467        | 8  |
| LT42C-065 | 85  | 119 | 0.71 | 0.0524 | 0.0022 | 0.4860 | 0.0210 | 0.0672 | 0.0011 | 304  | 93  | 402  | 14 | 419  | 6  | 95.9  | 419        | 6  |
| LT42C-066 | 84  | 167 | 0.50 | 0.0553 | 0.0020 | 0.5210 | 0.0190 | 0.0684 | 0.0010 | 423  | 78  | 426  | 13 | 427  | 6  | 99.8  | 427        | 6  |
| LT42C-067 | 169 | 179 | 0.95 | 0.0550 | 0.0020 | 0.5030 | 0.0180 | 0.0663 | 0.0010 | 413  | 78  | 414  | 12 | 414  | 6  | 100.0 | 414        | 6  |
| LT42C-068 | 83  | 115 | 0.72 | 0.0606 | 0.0043 | 0.5390 | 0.0430 | 0.0645 | 0.0012 | 624  | 148 | 438  | 28 | 403  | 7  | 108.7 | 403        | 7  |
| LT42C-069 | 218 | 185 | 1.18 | 0.1136 | 0.0028 | 5.256  | 0.1320 | 0.3354 | 0.0047 | 1858 | 42  | 1862 | 21 | 1865 | 23 | 99.6  | 1858       | 42 |
| LT42C-070 | 198 | 315 | 0.63 | 0.0549 | 0.0017 | 0.5050 | 0.0160 | 0.0666 | 0.0010 | 409  | 68  | 415  | 11 | 416  | 6  | 99.8  | 416        | 6  |
| LT42C-071 | 83  | 102 | 0.81 | 0.0977 | 0.0027 | 3.619  | 0.1010 | 0.2686 | 0.0039 | 1580 | 49  | 1554 | 22 | 1534 | 20 | 103.0 | 1580       | 49 |
| LT42C-072 | 190 | 442 | 0.43 | 0.0548 | 0.0016 | 0.5150 | 0.0150 | 0.0682 | 0.0010 | 404  | 63  | 422  | 10 | 425  | 6  | 99.3  | 425        | 6  |
| LT42C-073 | 119 | 162 | 0.73 | 0.0534 | 0.0021 | 0.4980 | 0.0200 | 0.0677 | 0.0011 | 344  | 85  | 411  | 13 | 422  | 6  | 97.4  | 422        | 6  |
| LT42C-074 | 103 | 178 | 0.58 | 0.0573 | 0.0021 | 0.5480 | 0.0200 | 0.0694 | 0.0011 | 502  | 78  | 444  | 13 | 433  | 6  | 102.5 | 433        | 6  |
| LT42C-075 | 209 | 353 | 0.59 | 0.0570 | 0.0018 | 0.5420 | 0.0170 | 0.0690 | 0.0010 | 490  | 66  | 440  | 11 | 430  | 6  | 102.3 | 430        | 6  |
| LT42C-076 | 132 | 213 | 0.62 | 0.0595 | 0.0021 | 0.5670 | 0.0200 | 0.0691 | 0.0011 | 586  | 72  | 456  | 13 | 431  | 6  | 105.8 | 431        | 6  |
| LT42C-077 | 350 | 456 | 0.77 | 0.1597 | 0.0039 | 9.351  | 0.2360 | 0.4245 | 0.0060 | 2453 | 40  | 2373 | 23 | 2281 | 27 | 107.5 | 2453       | 40 |
| LT42C-078 | 109 | 232 | 0.47 | 0.0552 | 0.0019 | 0.5380 | 0.0190 | 0.0708 | 0.0011 | 419  | 74  | 437  | 12 | 441  | 6  | 99.1  | 441        | 6  |
| LT42C-079 | 37  | 57  | 0.65 | 0.0565 | 0.0038 | 0.5380 | 0.0410 | 0.0691 | 0.0014 | 472  | 145 | 437  | 27 | 431  | 8  | 101.4 | 431        | 8  |
| LT42C-080 | 79  | 112 | 0.70 | 0.0571 | 0.0025 | 0.5380 | 0.0240 | 0.0684 | 0.0011 | 496  | 94  | 437  | 16 | 426  | 7  | 102.6 | 426        | 7  |
| LT42C-081 | 115 | 384 | 0.30 | 0.0564 | 0.0018 | 0.5190 | 0.0160 | 0.0667 | 0.0010 | 468  | 66  | 425  | 11 | 416  | 6  | 102.2 | 416        | 6  |
| LT42C-082 | 195 | 316 | 0.62 | 0.0564 | 0.0019 | 0.5560 | 0.0180 | 0.0715 | 0.0011 | 468  | 70  | 449  | 12 | 445  | 6  | 100.9 | 445        | 6  |
| LT42C-083 | 20  | 61  | 0.33 | 0.1103 | 0.0034 | 4.638  | 0.1430 | 0.3048 | 0.0047 | 1805 | 52  | 1756 | 26 | 1715 | 23 | 105.2 | 1805       | 52 |
| LT42C-084 | 93  | 165 | 0.56 | 0.0567 | 0.0023 | 0.5480 | 0.0220 | 0.0702 | 0.0011 | 478  | 85  | 444  | 15 | 437  | 7  | 101.6 | 437        | 7  |
| LT42C-085 | 255 | 579 | 0.44 | 0.0569 | 0.0017 | 0.5460 | 0.0170 | 0.0695 | 0.0010 | 488  | 63  | 442  | 11 | 433  | 6  | 102.1 | 433        | 6  |
| LT42C-086 | 75  | 124 | 0.61 | 0.0700 | 0.0024 | 1.355  | 0.0460 | 0.1403 | 0.0022 | 930  | 65  | 870  | 20 | 846  | 12 | 102.8 | 846        | 12 |
| LT42C-087 | 344 | 242 | 1.42 | 0.1569 | 0.0042 | 9.200  | 0.2520 | 0.4251 | 0.0062 | 2423 | 43  | 2358 | 25 | 2284 | 28 | 106.1 | 2423       | 43 |
| LT42C-088 | 179 | 306 | 0.58 | 0.0558 | 0.0019 | 0.5430 | 0.0190 | 0.0706 | 0.0011 | 445  | 71  | 440  | 12 | 439  | 6  | 100.2 | 439        | 6  |
| LT42C-089 | 102 | 214 | 0.48 | 0.0561 | 0.0021 | 0.5480 | 0.0200 | 0.0708 | 0.0011 | 456  | 77  | 443  | 13 | 441  | 7  | 100.5 | 441        | 7  |
| LT42C-090 | 114 | 220 | 0.52 | 0.0561 | 0.0021 | 0.5240 | 0.0190 | 0.0678 | 0.0011 | 454  | 77  | 428  | 13 | 423  | 6  | 101.2 | 423        | 6  |
| LT42C-091 | 292 | 422 | 0.69 | 0.0572 | 0.0019 | 0.5430 | 0.0180 | 0.0688 | 0.0010 | 501  | 67  | 440  | 12 | 429  | 6  | 102.6 | 429        | 6  |
| LT42C-092 | 165 | 274 | 0.60 | 0.0537 | 0.0020 | 0.5580 | 0.0210 | 0.0754 | 0.0012 | 357  | 79  | 450  | 13 | 469  | 7  | 95.9  | 469        | 7  |
| LT42C-093 | 98  | 183 | 0.54 | 0.0567 | 0.0023 | 0.5130 | 0.0210 | 0.0656 | 0.0011 | 479  | 84  | 421  | 14 | 410  | 6  | 102.7 | 410        | 6  |
| LT42C-094 | 114 | 243 | 0.47 | 0.0585 | 0.0023 | 0.5270 | 0.0210 | 0.0653 | 0.0011 | 547  | 81  | 430  | 14 | 408  | 6  | 105.4 | 408        | 6  |
| LT42C-095 | 181 | 222 | 0.81 | 0.0548 | 0.0021 | 0.5160 | 0.0200 | 0.0682 | 0.0011 | 404  | 80  | 422  | 13 | 425  | 6  | 99.3  | 425        | 6  |
| LT42C-096 | 58  | 130 | 0.44 | 0.0554 | 0.0029 | 0.5360 | 0.0310 | 0.0703 | 0.0012 | 426  | 111 | 436  | 21 | 438  | 7  | 99.5  | 438        | 7  |
| LT42C-097 | 115 | 409 | 0.28 | 0.0629 | 0.0020 | 0.7100 | 0.0230 | 0.0819 | 0.0012 | 706  | 65  | 545  | 14 | 507  | 7  | 107.5 | 507        | 7  |
| LT42C-098 | 114 | 206 | 0.56 | 0.0571 | 0.0022 | 0.5680 | 0.0220 | 0.0720 | 0.0011 | 497  | 79  | 456  | 14 | 448  | 7  | 101.8 | 448        | 7  |
| LT42C-099 | 106 | 188 | 0.56 | 0.0559 | 0.0025 | 0.5750 | 0.0260 | 0.0747 | 0.0013 | 448  | 95  | 462  | 17 | 464  | 8  | 99.6  | 464        | 8  |
| LT42C-100 | 84  | 114 | 0.74 | 0.0559 | 0.0025 | 0.5750 | 0.0260 | 0.0747 | 0.0013 | 448  | 95  | 462  | 17 | 464  | 8  | 99.6  | 464        | 8  |
| LT42C-101 | 240 | 273 | 0.88 | 0.0602 | 0.0022 | 0.6360 | 0.0230 | 0.0766 | 0.0012 | 611  | 73  | 500  | 14 | 476  | 7  | 105.0 | 476        | 7  |
| LT42C-102 | 296 | 404 | 0.73 | 0.0566 | 0.0019 | 0.5380 | 0.0190 | 0.0689 | 0.0011 | 475  | 71  | 437  |    |      |    |       |            |    |

|    |      |        |        |        |        |        |        |      |     |     |    |     |    |       |     |    |
|----|------|--------|--------|--------|--------|--------|--------|------|-----|-----|----|-----|----|-------|-----|----|
| 48 | 0.37 | 0.0726 | 0.0001 | 1.673  | 0.0180 | 0.1671 | 0.0018 | 1003 | 3   | 998 | 7  | 997 | 10 | 100.1 | 997 | 10 |
| 49 | 0.81 | 0.0647 | 0.0002 | 0.8600 | 0.0080 | 0.0964 | 0.0008 | 764  | 8   | 630 | 4  | 594 | 5  | 106.1 | 594 | 5  |
| 50 | 0.45 | 0.0520 | 0.0014 | 0.3240 | 0.0090 | 0.0452 | 0.0004 | 284  | 61  | 285 | 8  | 285 | 3  | 100.0 | 285 | 3  |
| 51 | 0.60 | 0.0517 | 0.0011 | 0.3210 | 0.0070 | 0.0450 | 0.0003 | 274  | 50  | 283 | 6  | 284 | 2  | 99.6  | 284 | 2  |
| 52 | 0.81 | 0.0527 | 0.0011 | 0.3280 | 0.0070 | 0.0452 | 0.0004 | 314  | 48  | 288 | 6  | 285 | 2  | 101.1 | 285 | 2  |
| 53 | 1.05 | 0.0564 | 0.0003 | 0.5370 | 0.0060 | 0.0690 | 0.0007 | 469  | 11  | 436 | 5  | 430 | 4  | 101.4 | 430 | 4  |
| 54 | 0.60 | 0.0507 | 0.0028 | 0.3150 | 0.0180 | 0.0451 | 0.0003 | 228  | 128 | 278 | 16 | 284 | 2  | 97.9  | 284 | 2  |
| 55 | 0.54 | 0.0510 | 0.0052 | 0.3100 | 0.0320 | 0.0441 | 0.0006 | 240  | 236 | 274 | 28 | 278 | 4  | 98.6  | 278 | 4  |
| 56 | 0.76 | 0.0535 | 0.0009 | 0.3230 | 0.0060 | 0.0438 | 0.0003 | 348  | 38  | 284 | 5  | 276 | 2  | 102.9 | 276 | 2  |
| 57 | 0.58 | 0.0532 | 0.0029 | 0.3220 | 0.0180 | 0.0439 | 0.0005 | 339  | 123 | 284 | 16 | 277 | 3  | 102.5 | 277 | 3  |
| 58 | 0.78 | 0.0570 | 0.0016 | 0.5160 | 0.0160 | 0.0657 | 0.0006 | 493  | 62  | 423 | 13 | 410 | 4  | 103.2 | 410 | 4  |

Sample Yg050412, muddy sandstone, Middle Permian Kaipazileike Formation in Dawangou section of northern Tarim, (Zou et al., 2013, Acta Petrologica Sinica)

|    |      |        |        |        |        |        |        |      |    |      |    |      |    |       |            |    |
|----|------|--------|--------|--------|--------|--------|--------|------|----|------|----|------|----|-------|------------|----|
| 1  | 0.36 | 0.0526 | 0.0001 | 0.3270 | 0.0040 | 0.0451 | 0.0006 | 313  | 5  | 288  | 3  | 285  | 4  | 101.1 | 285        | 4  |
| 2  | 0.28 | 0.0520 | 0.0002 | 0.2890 | 0.0030 | 0.0403 | 0.0004 | 286  | 8  | 258  | 3  | 255  | 3  | 101.2 | 255        | 3  |
| 3  | 0.96 | 0.0551 | 0.0002 | 0.5180 | 0.0070 | 0.0681 | 0.0008 | 416  | 9  | 424  | 4  | 425  | 5  | 99.8  | 425        | 5  |
| 4  | 0.24 | 0.0527 | 0.0002 | 0.3260 | 0.0040 | 0.0449 | 0.0006 | 318  | 10 | 287  | 3  | 283  | 4  | 101.4 | 283        | 4  |
| 5  | 0.31 | 0.0527 | 0.0002 | 0.3280 | 0.0040 | 0.0452 | 0.0006 | 314  | 7  | 288  | 3  | 285  | 3  | 101.1 | 285        | 3  |
| 6  | 0.27 | 0.0518 | 0.0003 | 0.3010 | 0.0040 | 0.0421 | 0.0005 | 278  | 12 | 267  | 3  | 266  | 3  | 100.4 | 266        | 3  |
| 7  | 0.41 | 0.0668 | 0.0002 | 1.331  | 0.0210 | 0.1445 | 0.0023 | 832  | 5  | 859  | 9  | 871  | 13 | 98.6  | 871        | 13 |
| 8  | 0.77 | 0.0575 | 0.0002 | 0.5670 | 0.0090 | 0.0715 | 0.0010 | 510  | 9  | 456  | 6  | 446  | 6  | 102.2 | 446        | 6  |
| 9  | 0.49 | 0.0558 | 0.0001 | 0.5300 | 0.0060 | 0.0689 | 0.0008 | 442  | 4  | 432  | 4  | 430  | 5  | 100.5 | 430        | 5  |
| 10 | 0.24 | 0.0521 | 0.0002 | 0.3460 | 0.0050 | 0.0482 | 0.0007 | 290  | 8  | 302  | 4  | 304  | 4  | 99.3  | 304        | 4  |
| 11 | 0.35 | 0.1086 | 0.0001 | 4.940  | 0.0840 | 0.3298 | 0.0056 | 1777 | 2  | 1809 | 14 | 1839 | 27 | 96.6  | 1777       | 2  |
| 12 | 0.53 | 0.0709 | 0.0001 | 1.563  | 0.0180 | 0.1599 | 0.0018 | 953  | 3  | 955  | 7  | 957  | 10 | 99.8  | 957        | 10 |
| 13 | 0.46 | 0.0555 | 0.0003 | 0.4690 | 0.0060 | 0.0613 | 0.0007 | 431  | 14 | 390  | 4  | 384  | 4  | 101.6 | 384        | 4  |
| 14 | 0.88 | 0.0550 | 0.0002 | 0.5030 | 0.0070 | 0.0662 | 0.0008 | 414  | 8  | 413  | 5  | 414  | 5  | 99.8  | 414        | 5  |
| 15 | 1.02 | 0.0549 | 0.0002 | 0.5260 | 0.0070 | 0.0694 | 0.0009 | 409  | 8  | 429  | 4  | 433  | 5  | 99.1  | 433        | 5  |
| 16 | 0.38 | 0.0557 | 0.0003 | 0.5580 | 0.0070 | 0.0726 | 0.0008 | 441  | 10 | 450  | 5  | 452  | 5  | 99.6  | 452        | 5  |
| 17 | 0.39 | 0.0613 | 0.0003 | 0.9170 | 0.0140 | 0.1084 | 0.0015 | 650  | 10 | 660  | 7  | 664  | 9  | 99.4  | 664        | 9  |
| 18 | 0.75 | 0.0554 | 0.0001 | 0.5540 | 0.0080 | 0.0725 | 0.0010 | 429  | 5  | 448  | 5  | 452  | 6  | 99.1  | 452        | 6  |
| 19 | 1.00 | 0.0646 | 0.0002 | 1.096  | 0.0180 | 0.1230 | 0.0020 | 761  | 5  | 751  | 9  | 749  | 11 | 100.3 | 749        | 11 |
| 20 | 0.40 | 0.0531 | 0.0001 | 0.3630 | 0.0050 | 0.0495 | 0.0006 | 332  | 5  | 314  | 3  | 312  | 4  | 100.6 | 312        | 4  |
| 21 | 0.25 | 0.0664 | 0.0001 | 1.263  | 0.0120 | 0.1379 | 0.0013 | 818  | 3  | 829  | 5  | 834  | 7  | 99.4  | 834        | 7  |
| 22 | 0.48 | 0.0725 | 0.0003 | 1.591  | 0.0170 | 0.1591 | 0.0017 | 1000 | 7  | 966  | 7  | 953  | 9  | 101.4 | 953        | 9  |
| 23 | 0.46 | 0.1207 | 0.0002 | 5.863  | 0.0750 | 0.3525 | 0.0044 | 1966 | 3  | 1956 | 11 | 1948 | 21 | 100.9 | 1966       | 3  |
| 24 | 0.51 | 0.0655 | 0.0003 | 1.170  | 0.0120 | 0.1297 | 0.0012 | 789  | 8  | 787  | 6  | 787  | 7  | 100.0 | 787        | 7  |
| 25 | 0.37 | 0.0651 | 0.0001 | 1.176  | 0.0130 | 0.1311 | 0.0015 | 777  | 4  | 789  | 6  | 795  | 8  | 99.2  | 795        | 8  |
| 26 | 0.71 | 0.0667 | 0.0001 | 1.170  | 0.0220 | 0.1273 | 0.0023 | 827  | 4  | 787  | 10 | 773  | 13 | 101.8 | 773        | 13 |
| 27 | 0.29 | 0.0523 | 0.0002 | 0.3480 | 0.0050 | 0.0483 | 0.0007 | 300  | 7  | 303  | 4  | 304  | 4  | 99.7  | 304        | 4  |
| 28 | 0.41 | 0.0666 | 0.0002 | 1.263  | 0.0160 | 0.1375 | 0.0017 | 826  | 5  | 829  | 7  | 831  | 10 | 99.8  | 831        | 10 |
| 29 | 0.86 | 0.0556 | 0.0002 | 0.5230 | 0.0060 | 0.0682 | 0.0008 | 438  | 7  | 427  | 4  | 426  | 5  | 100.2 | 426        | 5  |
| 30 | 0.42 | 0.0553 | 0.0002 | 0.5220 | 0.0070 | 0.0684 | 0.0009 | 425  | 7  | 426  | 5  | 427  | 6  | 99.8  | 427        | 6  |
| 31 | 0.83 | 0.0661 | 0.0001 | 1.165  | 0.0150 | 0.1278 | 0.0016 | 809  | 4  | 784  | 7  | 776  | 9  | 101.0 | 776        | 9  |
| 32 | 0.69 | 0.1064 | 0.0001 | 4.667  | 0.0440 | 0.3181 | 0.0030 | 1739 | 2  | 1761 | 8  | 1782 | 15 | 97.6  | 1739       | 2  |
| 33 | 0.41 | 0.0517 | 0.0003 | 0.3300 | 0.0050 | 0.0463 | 0.0007 | 272  | 13 | 290  | 4  | 292  | 4  | 99.3  | 292        | 4  |
| 34 | 0.41 | 0.0532 | 0.0003 | 0.3210 | 0.0040 | 0.0438 | 0.0005 | 337  | 14 | 283  | 3  | 277  | 3  | 102.2 | 277        | 3  |
| 35 | 0.26 | 0.0528 | 0.0002 | 0.3080 | 0.0040 | 0.0423 | 0.0005 | 319  | 8  | 273  | 3  | 267  | 3  | 102.2 | 267        | 3  |
| 36 | 0.38 | 0.0521 | 0.0003 | 0.3290 | 0.0050 | 0.0458 | 0.0006 | 289  | 15 | 289  | 4  | 289  | 3  | 100.0 | 289        | 3  |
| 37 | 0.41 | 0.0551 | 0.0002 | 0.5150 | 0.0070 | 0.0677 | 0.0009 | 416  | 8  | 421  | 5  | 423  | 5  | 99.5  | 423        | 5  |
| 38 | 0.27 | 0.0522 | 0.0002 | 0.3260 | 0.0040 | 0.0453 | 0.0005 | 294  | 9  | 287  | 3  | 286  | 3  | 100.3 | 286        | 3  |
| 39 | 0.38 | 0.0529 | 0.0002 | 0.3170 | 0.0030 | 0.0434 | 0.0004 | 326  | 6  | 279  | 3  | 274  | 3  | 101.8 | 274        | 3  |
| 40 | 0.21 | 0.0665 | 0.0001 | 1.307  | 0.0170 | 0.1427 | 0.0018 | 821  | 3  | 849  | 7  | 860  | 10 | 98.7  | 860        | 10 |
| 41 | 0.53 | 0.0605 | 0.0005 | 0.5760 | 0.0080 | 0.0691 | 0.0008 | 622  | 18 | 462  | 5  | 431  | 5  | 107.2 | 431        | 5  |
| 42 | 0.40 | 0.0562 | 0.0001 | 0.5280 | 0.0060 | 0.0682 | 0.0008 | 460  | 5  | 430  | 4  | 425  | 5  | 101.2 | 425        | 5  |
| 43 | 0.58 | 0.0679 | 0.0001 | 1.360  | 0.0200 | 0.1453 | 0.0021 | 865  | 4  | 872  | 8  | 875  | 12 | 99.7  | 875        | 12 |
| 44 | 0.93 | 0.0554 | 0.0002 | 0.5310 | 0.0060 | 0.0696 | 0.0007 | 427  | 8  | 433  | 4  | 434  | 4  | 99.8  | 434        | 4  |
| 45 | 0.37 | 0.0524 | 0.0003 | 0.3300 | 0.0040 | 0.0457 | 0.0005 | 301  | 11 | 289  | 3  | 288  | 3  | 100.3 | 288        | 3  |
| 46 | 0.40 | 0.0583 | 0.0002 | 0.5200 | 0.0050 | 0.0647 | 0.0005 | 539  | 9  | 425  | 3  | 405  | 3  | 104.9 | 405        | 3  |
| 47 | 0.31 | 0.0523 | 0.0001 | 0.3480 | 0.0040 | 0.0482 | 0.0006 | 298  | 4  | 303  | 3  | 304  | 3  | 99.7  | 304        | 3  |
| 48 | 0.36 | 0.0561 | 0.0001 | 0.5650 | 0.0060 | 0.0730 | 0.0008 | 456  | 5  | 454  | 4  | 455  | 5  | 99.8  | 455        | 5  |
| 49 | 0.91 | 0.0521 | 0.0002 | 0.3050 | 0.0040 | 0.0424 | 0.0005 | 288  | 9  | 270  | 3  | 268  | 3  | 100.7 | 268        | 3  |
| 50 | 0.37 | 0.0525 | 0.0002 | 0.3300 | 0.0040 | 0.0455 | 0.0005 | 309  | 9  | 289  | 3  | 287  | 3  | 100.7 | 287        | 3  |
| 51 | 0.38 | 0.0527 | 0.0002 | 0.3530 | 0.0050 | 0.0485 | 0.0006 | 315  | 7  | 307  | 3  | 306  | 4  | 100.3 | 306        | 4  |
| 52 | 0.74 | 0.0538 | 0.0002 | 0.3830 | 0.0050 | 0.0516 | 0.0006 | 363  | 8  | 329  | 4  | 325  | 4  | 101.2 | 325        | 4  |
| 53 | 1.25 | 0.0557 | 0.0002 | 0.5280 | 0.0070 | 0.0687 | 0.0009 | 441  | 7  | 430  | 5  | 429  | 5  | 100.2 | 429        | 5  |
| 54 | 0.37 | 0.0529 | 0.0002 | 0.3180 | 0.0040 | 0.0436 | 0.0006 | 323  | 6  | 280  | 3  | 275  | 4  | 101.8 | 275        | 4  |
| 55 | 0.38 | 0.0532 | 0.0001 | 0.3510 | 0.0040 | 0.0478 | 0.0005 | 338  | 5  | 305  | 3  | 301  | 3  | 101.3 | 301        | 3  |
| 56 | 0.94 | 0.0557 | 0.0001 | 0.5500 | 0.0070 | 0.0717 | 0.0010 | 439  | 5  | 445  | 5  | 447  | 6  | 99.6  | 447        | 6  |
| 57 | 0.45 | 0.0676 | 0.0002 | 1.181  | 0.0120 | 0.1267 | 0.0012 | 856  | 7  | 791  | 5  | 769  | 7  | 102.9 | 769        | 7  |
| 58 | 0.72 | 0.0564 | 0.0002 | 0.5430 | 0.0070 | 0.0698 | 0.0008 | 470  | 9  | 440  | 4  | 435  | 5  | 101.1 | 435        | 5  |
| 59 | 0.03 | 0.0656 | 0.0001 | 1.154  | 0.0120 | 0.1276 | 0.0013 | 793  | 4  | 779  | 6  | 775  | 7  | 100.5 | 775        | 7  |
| 60 | 0.25 | 0.0521 | 0.0002 | 0.3360 | 0.0040 | 0.0468 | 0.0005 | 289  | 9  | 294  | 3  | 295  | 3  | 99.7  | 295        | 3  |
| 61 | 0.35 | 0.0519 | 0.0001 | 0.3460 | 0.0040 | 0.0484 | 0.0005 | 281  | 6  | 302  | 3  | 305  | 3  | 99.0  | 305        | 3  |
| 62 | 0.39 | 0.0574 | 0.0003 | 0.5290 | 0.0060 | 0.0668 | 0.0007 | 508  | 10 | 431  | 4  | 417  | 4  | 103.4 | 417        | 4  |
| 63 | 0.40 | 0.0518 | 0.0002 | 0.3400 | 0.0050 | 0.0476 | 0.0006 | 278  | 6  | 297  | 3  | 300  | 4  | 99.0  | 300        | 4  |
| 64 | 0.32 | 0.1601 | 0.0001 | 11.018 | 0.0650 | 0.4991 | 0.0029 | 2457 | 1  | 2524 | 5  | 2612 | 13 | 94.1  | 2457       | 1  |
| 65 | 0.55 | 0.0911 | 0.0001 | 3.238  | 0.0290 | 0.2578 | 0.0023 | 1448 | 2  | 1466 | 7  | 1480 | 12 | 97.8  | 1448       | 2  |
| 66 | 0.98 | 0.0552 | 0.0001 | 0.5150 | 0.0060 | 0.0677 | 0.0008 | 420  | 6  | 422  | 4  | 423  | 5  | 99.8  | 423        | 5  |
| 67 | 0.18 | 0.0656 | 0.0001 | 1.215  | 0.0160 | 0.1344 | 0.0017 | 792  | 3  | 807  | 7  | 814  | 10 | 99.1  | 814        | 10 |
| 68 | 0.67 | 0.0674 | 0.0001 | 1.257  | 0.0160 | 0.1352 | 0.0018 | 850  | 3  | 826  | 7  | 818  | 10 | 101.0 | 818        | 10 |
| 69 | 0.43 | 0.0523 | 0.0001 | 0.3370 | 0.0040 | 0.0467 | 0.0006 | 300  | 4  | 295  | 3  | 294  | 4  | 100.3 | 294        | 4  |
| 70 | 0.13 | 0.0728 | 0.0002 | 1.622  | 0.0170 | 0.1616 | 0.0017 | 1009 | 4  | 979  | 7  | 966  | 9  | 101.3 | 966        | 9  |
| 71 | 0.25 | 0.0566 | 0.0004 | 0.3920 | 0.0040 | 0.0502 | 0.0004 | 475  | 16 | 335  | 3  | 316  | 3  | 106.0 | 316        | 3  |
| 72 | 0.31 | 0.0523 | 0.0002 | 0.3260 | 0.0040 | 0.0452 | 0.0005 | 299  | 9  | 286  | 3  | 285  | 3  | 100.4 | 285        | 3  |
| 73 | 0.26 | 0.0552 | 0.0005 | 0.3230 | 0.0050 | 0.0424 | 0.0005 | 422  | 20 | 284  | 4  | 268  | 3  | 106.0 | 268        | 3  |
| 74 | 0.34 | 0.0521 | 0.0002 | 0.3380 | 0.0040 | 0.0470 | 0.0005 | 289  | 6  | 295  | 3  | 297  | 3  | 99.3  | 297        | 3  |
| 75 | 0.74 | 0.0645 | 0.0002 | 1.166  | 0.0180 | 0.1311 | 0.0020 | 759  | 6  | 785  | 8  | 795  | 11 | 98.7  | 795        | 11 |
| 76 | 0.29 | 0.0993 | 0.0001 | 4.841  | 0.0450 | 0.3536 | 0.0033 | 1611 | 2  | 1792 | 8  | 1953 | 16 | 82.5  | Discordant |    |
| 77 | 0.75 | 0.0646 | 0.0001 | 1.163  | 0.0150 | 0.1306 | 0.0016 | 761  | 4  | 783  | 7  | 792  | 9  | 98.9  | 792        | 9  |
| 78 | 0.36 | 0.0519 | 0.0002 | 0.3290 | 0.0040 | 0.0459 | 0.0006 | 281  | 7  | 288  | 3  | 290  | 3  | 99.3  | 290        | 3  |
| 79 | 0.38 | 0.0524 | 0.0003 | 0.3300 | 0.0040 | 0.0457 | 0.0005 | 303  | 14 | 290  | 3  | 288  | 3  | 100.7 | 288        | 3  |
| 80 | 0.29 | 0.0545 | 0.0003 | 0.3500 | 0.0040 | 0.0465 | 0.0005 | 393  | 13 | 305  | 3  | 293  | 3  | 104.1 | 293        | 3  |
| 81 | 0.94 | 0.0560 | 0.0002 | 0.5350 | 0.0050 | 0.0694 | 0.0006 | 451  | 7  | 435  | 3  | 433  | 3  | 100.  |            |    |

|    |      |        |        |        |        |        |        |      |    |      |    |      |    |       |            |    |
|----|------|--------|--------|--------|--------|--------|--------|------|----|------|----|------|----|-------|------------|----|
| 20 | 1.39 | 0.0675 | 0.0001 | 1.282  | 0.0110 | 0.1377 | 0.0012 | 854  | 3  | 837  | 5  | 832  | 7  | 100.6 | 832        | 7  |
| 21 | 0.54 | 0.0534 | 0.0001 | 0.3250 | 0.0030 | 0.0441 | 0.0004 | 348  | 5  | 286  | 3  | 278  | 3  | 102.9 | 278        | 3  |
| 22 | 0.62 | 0.0531 | 0.0002 | 0.3440 | 0.0040 | 0.0470 | 0.0005 | 332  | 7  | 300  | 3  | 297  | 3  | 101.0 | 297        | 3  |
| 23 | 0.63 | 0.0562 | 0.0001 | 0.5640 | 0.0060 | 0.0727 | 0.0008 | 460  | 6  | 454  | 4  | 453  | 5  | 100.2 | 453        | 5  |
| 24 | 0.90 | 0.0554 | 0.0001 | 0.5420 | 0.0060 | 0.0709 | 0.0008 | 430  | 5  | 440  | 4  | 442  | 5  | 99.5  | 442        | 5  |
| 25 | 0.90 | 0.0557 | 0.0002 | 0.5320 | 0.0050 | 0.0693 | 0.0006 | 439  | 8  | 433  | 3  | 432  | 4  | 100.2 | 432        | 4  |
| 26 | 0.63 | 0.0529 | 0.0002 | 0.3900 | 0.0040 | 0.0536 | 0.0006 | 324  | 8  | 335  | 3  | 337  | 4  | 99.4  | 337        | 4  |
| 27 | 0.61 | 0.0554 | 0.0002 | 0.5450 | 0.0060 | 0.0713 | 0.0007 | 429  | 7  | 441  | 4  | 444  | 5  | 99.3  | 444        | 5  |
| 28 | 0.46 | 0.1953 | 0.0003 | 12.960 | 0.1900 | 0.4813 | 0.0070 | 2787 | 2  | 2676 | 14 | 2535 | 30 | 109.9 | 2787       | 2  |
| 29 | 0.32 | 0.0528 | 0.0002 | 0.3090 | 0.0040 | 0.0424 | 0.0005 | 318  | 9  | 273  | 3  | 268  | 3  | 101.9 | 268        | 3  |
| 30 | 1.17 | 0.0557 | 0.0001 | 0.5190 | 0.0060 | 0.0677 | 0.0007 | 438  | 6  | 425  | 4  | 423  | 4  | 100.5 | 423        | 4  |
| 31 | 0.34 | 0.0527 | 0.0003 | 0.3060 | 0.0040 | 0.0421 | 0.0004 | 314  | 13 | 271  | 3  | 266  | 3  | 101.9 | 266        | 3  |
| 32 | 0.53 | 0.0543 | 0.0002 | 0.3470 | 0.0050 | 0.0464 | 0.0006 | 384  | 8  | 303  | 4  | 293  | 4  | 103.4 | 293        | 4  |
| 33 | 1.15 | 0.0655 | 0.0002 | 1.103  | 0.0150 | 0.1222 | 0.0017 | 789  | 5  | 755  | 7  | 744  | 10 | 101.5 | 744        | 10 |
| 34 | 0.20 | 0.0554 | 0.0001 | 0.5330 | 0.0070 | 0.0698 | 0.0009 | 427  | 5  | 433  | 5  | 435  | 6  | 99.5  | 435        | 6  |
| 35 | 0.40 | 0.0687 | 0.0002 | 1.324  | 0.0150 | 0.1397 | 0.0015 | 891  | 5  | 856  | 6  | 844  | 9  | 101.4 | 844        | 9  |
| 36 | 0.65 | 0.1180 | 0.0002 | 5.267  | 0.0600 | 0.3237 | 0.0037 | 1926 | 3  | 1863 | 10 | 1809 | 18 | 106.5 | 1926       | 3  |
| 37 | 0.35 | 0.0552 | 0.0003 | 0.4710 | 0.0060 | 0.0619 | 0.0007 | 420  | 10 | 392  | 4  | 387  | 4  | 101.3 | 387        | 4  |
| 38 | 0.18 | 0.0714 | 0.0001 | 1.587  | 0.0130 | 0.1612 | 0.0013 | 968  | 3  | 965  | 5  | 964  | 7  | 100.1 | 964        | 7  |
| 39 | 0.37 | 0.0544 | 0.0002 | 0.4690 | 0.0060 | 0.0626 | 0.0008 | 386  | 6  | 391  | 4  | 392  | 5  | 99.7  | 392        | 5  |
| 40 | 0.41 | 0.0553 | 0.0002 | 0.5300 | 0.0070 | 0.0695 | 0.0009 | 425  | 7  | 432  | 5  | 434  | 6  | 99.5  | 434        | 6  |
| 41 | 0.37 | 0.1361 | 0.0003 | 5.430  | 0.1200 | 0.2895 | 0.0061 | 2179 | 4  | 1890 | 18 | 1640 | 30 | 132.9 | Discordant |    |
| 42 | 0.53 | 0.0554 | 0.0002 | 0.4970 | 0.0060 | 0.0651 | 0.0008 | 428  | 6  | 410  | 4  | 407  | 5  | 100.7 | 407        | 5  |
| 43 | 0.43 | 0.0524 | 0.0004 | 0.2810 | 0.0040 | 0.0390 | 0.0005 | 301  | 18 | 252  | 3  | 247  | 3  | 102.0 | 247        | 3  |
| 44 | 1.00 | 0.0624 | 0.0004 | 0.9300 | 0.0150 | 0.1081 | 0.0016 | 688  | 15 | 667  | 8  | 662  | 9  | 100.8 | 662        | 9  |
| 45 | 0.53 | 0.0543 | 0.0006 | 0.4480 | 0.0080 | 0.0599 | 0.0009 | 384  | 23 | 376  | 6  | 375  | 6  | 100.3 | 375        | 6  |
| 46 | 0.40 | 0.0554 | 0.0002 | 0.4620 | 0.0060 | 0.0605 | 0.0008 | 429  | 6  | 386  | 4  | 379  | 5  | 101.8 | 379        | 5  |
| 47 | 0.43 | 0.0533 | 0.0003 | 0.3230 | 0.0050 | 0.0439 | 0.0006 | 343  | 13 | 284  | 4  | 277  | 4  | 102.5 | 277        | 4  |
| 48 | 0.44 | 0.0551 | 0.0002 | 0.5070 | 0.0040 | 0.0667 | 0.0005 | 417  | 8  | 416  | 3  | 417  | 3  | 99.8  | 417        | 3  |
| 49 | 0.69 | 0.0544 | 0.0002 | 0.4920 | 0.0070 | 0.0656 | 0.0009 | 388  | 9  | 406  | 5  | 410  | 5  | 99.0  | 410        | 5  |
| 50 | 0.50 | 0.0549 | 0.0001 | 0.4840 | 0.0070 | 0.0639 | 0.0009 | 409  | 5  | 401  | 5  | 400  | 5  | 100.3 | 400        | 5  |
| 51 | 0.94 | 0.1110 | 0.0002 | 5.194  | 0.0700 | 0.3393 | 0.0045 | 1816 | 3  | 1851 | 11 | 1885 | 22 | 96.3  | 1816       | 3  |
| 52 | 0.43 | 0.0521 | 0.0002 | 0.3170 | 0.0040 | 0.0441 | 0.0006 | 291  | 7  | 279  | 3  | 278  | 3  | 100.4 | 278        | 3  |
| 53 | 0.50 | 0.0715 | 0.0001 | 1.710  | 0.0220 | 0.1734 | 0.0022 | 972  | 3  | 1012 | 8  | 1032 | 12 | 94.2  | 972        | 3  |
| 54 | 0.61 | 0.0543 | 0.0003 | 0.4110 | 0.0060 | 0.0550 | 0.0008 | 383  | 11 | 350  | 4  | 345  | 5  | 101.4 | 345        | 5  |
| 55 | 0.79 | 0.0984 | 0.0001 | 4.030  | 0.0450 | 0.2972 | 0.0033 | 1593 | 2  | 1640 | 9  | 1679 | 16 | 94.9  | 1593       | 2  |
| 56 | 0.25 | 0.0525 | 0.0001 | 0.3270 | 0.0050 | 0.0451 | 0.0006 | 308  | 6  | 287  | 4  | 285  | 4  | 100.7 | 285        | 4  |
| 57 | 0.36 | 0.0556 | 0.0002 | 0.3590 | 0.0050 | 0.0469 | 0.0007 | 437  | 8  | 312  | 4  | 295  | 4  | 105.8 | 295        | 4  |
| 58 | 0.30 | 0.0552 | 0.0001 | 0.5090 | 0.0080 | 0.0669 | 0.0010 | 421  | 3  | 418  | 5  | 418  | 6  | 100.0 | 418        | 6  |
| 59 | 0.65 | 0.0655 | 0.0001 | 1.206  | 0.0170 | 0.1335 | 0.0019 | 790  | 4  | 803  | 8  | 808  | 11 | 99.4  | 808        | 11 |
| 60 | 0.16 | 0.0563 | 0.0002 | 0.5660 | 0.0110 | 0.0729 | 0.0014 | 464  | 6  | 455  | 7  | 454  | 9  | 100.2 | 454        | 9  |
| 61 | 0.39 | 0.0520 | 0.0003 | 0.3260 | 0.0050 | 0.0454 | 0.0006 | 285  | 12 | 286  | 3  | 287  | 4  | 99.7  | 287        | 4  |
| 62 | 1.19 | 0.0650 | 0.0001 | 1.120  | 0.0160 | 0.1250 | 0.0018 | 773  | 5  | 763  | 8  | 760  | 10 | 100.4 | 760        | 10 |
| 63 | 0.30 | 0.0519 | 0.0002 | 0.3260 | 0.0050 | 0.0455 | 0.0006 | 282  | 8  | 286  | 4  | 287  | 4  | 99.7  | 287        | 4  |
| 64 | 0.29 | 0.0522 | 0.0002 | 0.3370 | 0.0050 | 0.0468 | 0.0007 | 293  | 10 | 295  | 4  | 295  | 4  | 100.0 | 295        | 4  |
| 65 | 0.31 | 0.0525 | 0.0003 | 0.3340 | 0.0050 | 0.0462 | 0.0006 | 306  | 11 | 293  | 4  | 291  | 4  | 100.7 | 291        | 4  |
| 66 | 0.37 | 0.0524 | 0.0001 | 0.3440 | 0.0050 | 0.0476 | 0.0007 | 304  | 5  | 300  | 4  | 300  | 4  | 100.0 | 300        | 4  |
| 67 | 0.46 | 0.0554 | 0.0002 | 0.5310 | 0.0080 | 0.0696 | 0.0011 | 428  | 6  | 433  | 5  | 434  | 6  | 99.8  | 434        | 6  |
| 68 | 0.29 | 0.0521 | 0.0002 | 0.3270 | 0.0050 | 0.0455 | 0.0006 | 291  | 8  | 287  | 4  | 287  | 4  | 100.0 | 287        | 4  |
| 69 | 0.30 | 0.0697 | 0.0001 | 1.552  | 0.0220 | 0.1615 | 0.0023 | 919  | 4  | 951  | 9  | 966  | 13 | 98.4  | 966        | 13 |
| 70 | 0.66 | 0.0647 | 0.0002 | 1.125  | 0.0230 | 0.1262 | 0.0025 | 763  | 5  | 765  | 11 | 767  | 14 | 99.7  | 767        | 14 |
| 71 | 0.35 | 0.0521 | 0.0002 | 0.3570 | 0.0050 | 0.0497 | 0.0007 | 291  | 7  | 310  | 4  | 313  | 4  | 99.0  | 313        | 4  |
| 72 | 0.48 | 0.0659 | 0.0001 | 1.226  | 0.0120 | 0.1349 | 0.0014 | 804  | 3  | 812  | 6  | 816  | 8  | 99.5  | 816        | 8  |
| 73 | 0.42 | 0.1131 | 0.0002 | 5.268  | 0.0650 | 0.3379 | 0.0041 | 1849 | 2  | 1863 | 10 | 1878 | 20 | 98.5  | 1849       | 2  |
| 74 | 0.30 | 0.0521 | 0.0002 | 0.3320 | 0.0050 | 0.0462 | 0.0007 | 288  | 7  | 291  | 4  | 292  | 4  | 99.7  | 292        | 4  |
| 75 | 1.10 | 0.0645 | 0.0002 | 1.076  | 0.0150 | 0.1209 | 0.0017 | 759  | 7  | 741  | 8  | 736  | 10 | 100.7 | 736        | 10 |
| 76 | 0.80 | 0.0720 | 0.0002 | 1.582  | 0.0220 | 0.1593 | 0.0022 | 986  | 5  | 963  | 9  | 954  | 12 | 100.9 | 954        | 12 |
| 77 | 0.49 | 0.0524 | 0.0001 | 0.3140 | 0.0040 | 0.0435 | 0.0006 | 303  | 5  | 277  | 3  | 274  | 4  | 101.1 | 274        | 4  |
| 78 | 0.34 | 0.0661 | 0.0001 | 1.285  | 0.0170 | 0.1410 | 0.0018 | 809  | 3  | 839  | 7  | 851  | 10 | 98.6  | 851        | 10 |
| 79 | 0.34 | 0.0552 | 0.0002 | 0.5300 | 0.0080 | 0.0695 | 0.0010 | 422  | 6  | 431  | 5  | 434  | 6  | 99.3  | 434        | 6  |
| 80 | 0.26 | 0.0522 | 0.0001 | 0.3390 | 0.0050 | 0.0471 | 0.0007 | 294  | 6  | 296  | 4  | 297  | 4  | 99.7  | 297        | 4  |
| 81 | 0.30 | 0.0522 | 0.0001 | 0.3610 | 0.0050 | 0.0501 | 0.0007 | 294  | 5  | 313  | 4  | 315  | 4  | 99.4  | 315        | 4  |
| 82 | 0.41 | 0.0527 | 0.0001 | 0.3740 | 0.0050 | 0.0515 | 0.0007 | 316  | 6  | 322  | 4  | 324  | 4  | 99.4  | 324        | 4  |
| 83 | 0.32 | 0.0526 | 0.0002 | 0.3460 | 0.0050 | 0.0477 | 0.0007 | 313  | 7  | 302  | 4  | 301  | 4  | 100.3 | 301        | 4  |
| 84 | 0.43 | 0.0801 | 0.0001 | 2.465  | 0.0310 | 0.2232 | 0.0028 | 1199 | 3  | 1262 | 9  | 1300 | 15 | 92.2  | 1199       | 3  |
| 85 | 0.32 | 0.0553 | 0.0001 | 0.5130 | 0.0070 | 0.0673 | 0.0009 | 423  | 4  | 420  | 5  | 420  | 6  | 100.0 | 420        | 6  |

Sample LT24B, quartz wacke, Early Permian Kupukuziman Formation in Linkuangchang section of northern Tarim, (Han et al., 2016, Lithos)

|           |     |     |      |        |        |        |        |        |        |      |     |      |    |      |    |       |            |    |
|-----------|-----|-----|------|--------|--------|--------|--------|--------|--------|------|-----|------|----|------|----|-------|------------|----|
| LT24B-001 | 42  | 91  | 0.46 | 0.0512 | 0.0025 | 0.3120 | 0.0150 | 0.0442 | 0.0007 | 250  | 108 | 276  | 12 | 279  | 4  | 98.9  | 279        | 4  |
| LT24B-002 | 94  | 116 | 0.81 | 0.1186 | 0.0021 | 5.609  | 0.1040 | 0.3428 | 0.0044 | 1936 | 31  | 1918 | 16 | 1900 | 21 | 101.9 | 1936       | 31 |
| LT24B-003 | 238 | 406 | 0.59 | 0.0679 | 0.0013 | 1.297  | 0.0240 | 0.1384 | 0.0017 | 867  | 37  | 844  | 11 | 836  | 10 | 101.0 | 836        | 10 |
| LT24B-004 | 406 | 347 | 1.17 | 0.0559 | 0.0013 | 0.5540 | 0.0130 | 0.0718 | 0.0009 | 450  | 49  | 447  | 8  | 447  | 6  | 100.0 | 447        | 6  |
| LT24B-005 | 127 | 212 | 0.60 | 0.0514 | 0.0016 | 0.3380 | 0.0110 | 0.0478 | 0.0007 | 258  | 70  | 296  | 8  | 301  | 4  | 98.3  | 301        | 4  |
| LT24B-006 | 58  | 52  | 1.11 | 0.1125 | 0.0025 | 4.926  | 0.1090 | 0.3174 | 0.0043 | 1841 | 38  | 1807 | 19 | 1777 | 21 | 103.6 | 1841       | 38 |
| LT24B-007 | 131 | 194 | 0.67 | 0.0556 | 0.0016 | 0.5460 | 0.0150 | 0.0712 | 0.0010 | 437  | 61  | 442  | 10 | 443  | 6  | 99.8  | 443        | 6  |
| LT24B-008 | 111 | 278 | 0.40 | 0.0541 | 0.0015 | 0.3400 | 0.0100 | 0.0456 | 0.0006 | 374  | 62  | 297  | 7  | 288  | 4  | 103.1 | 288        | 4  |
| LT24B-009 | 56  | 135 | 0.42 | 0.0528 | 0.0020 | 0.3230 | 0.0120 | 0.0444 | 0.0007 | 319  | 85  | 284  | 9  | 280  | 4  | 101.4 | 280        | 4  |
| LT24B-010 | 153 | 245 | 0.62 | 0.1294 | 0.0021 | 6.886  | 0.1180 | 0.3860 | 0.0048 | 2089 | 28  | 2097 | 15 | 2104 | 22 | 99.3  | 2089       | 28 |
| LT24B-011 | 14  | 35  | 0.39 | 0.0629 | 0.0040 | 0.5120 | 0.0340 | 0.0590 | 0.0012 | 705  | 131 | 420  | 23 | 370  | 7  | 113.5 | Discordant |    |
| LT24B-012 | 63  | 82  | 0.77 | 0.0592 | 0.0023 | 0.5880 | 0.0220 | 0.0720 | 0.0011 | 575  | 80  | 470  | 14 | 448  | 6  | 104.9 | 448        | 6  |

|           |     |     |      |        |        |        |        |        |        |      |     |      |    |      |    |       |            |    |
|-----------|-----|-----|------|--------|--------|--------|--------|--------|--------|------|-----|------|----|------|----|-------|------------|----|
| LT24B-052 | 200 | 159 | 1.26 | 0.0532 | 0.0018 | 0.4820 | 0.0160 | 0.0657 | 0.0009 | 339  | 70  | 399  | 11 | 410  | 6  | 97.3  | 410        | 6  |
| LT24B-053 | 107 | 173 | 0.62 | 0.1384 | 0.0027 | 7.882  | 0.1590 | 0.4131 | 0.0054 | 2207 | 32  | 2218 | 18 | 2229 | 24 | 99.0  | 2207       | 32 |
| LT24B-054 | 54  | 128 | 0.42 | 0.0504 | 0.0021 | 0.3330 | 0.0130 | 0.0479 | 0.0007 | 215  | 88  | 292  | 10 | 302  | 4  | 96.7  | 302        | 4  |
| LT24B-055 | 46  | 124 | 0.37 | 0.0857 | 0.0019 | 2.847  | 0.0650 | 0.2411 | 0.0032 | 1330 | 41  | 1368 | 17 | 1392 | 17 | 95.5  | 1330       | 41 |
| LT24B-056 | 97  | 98  | 0.99 | 0.0575 | 0.0019 | 0.7280 | 0.0240 | 0.0917 | 0.0013 | 512  | 70  | 555  | 14 | 566  | 8  | 98.1  | 566        | 8  |
| LT24B-057 | 324 | 463 | 0.70 | 0.1576 | 0.0031 | 9.909  | 0.1990 | 0.4560 | 0.0059 | 2430 | 31  | 2426 | 18 | 2422 | 26 | 100.3 | 2430       | 31 |
| LT24B-058 | 98  | 118 | 0.83 | 0.0648 | 0.0017 | 1.233  | 0.0330 | 0.1380 | 0.0019 | 769  | 53  | 816  | 15 | 833  | 11 | 98.0  | 833        | 11 |
| LT24B-059 | 43  | 48  | 0.90 | 0.1117 | 0.0028 | 5.269  | 0.1320 | 0.3420 | 0.0048 | 1828 | 42  | 1864 | 21 | 1896 | 23 | 96.4  | 1828       | 42 |
| LT24B-060 | 97  | 162 | 0.60 | 0.0597 | 0.0017 | 0.8480 | 0.0240 | 0.1031 | 0.0014 | 591  | 57  | 623  | 13 | 632  | 8  | 98.6  | 632        | 8  |
| LT24B-061 | 44  | 42  | 1.05 | 0.1101 | 0.0028 | 4.854  | 0.1250 | 0.3199 | 0.0046 | 1800 | 44  | 1794 | 22 | 1789 | 22 | 100.6 | 1800       | 44 |
| LT24B-062 | 56  | 269 | 0.21 | 0.0869 | 0.0019 | 3.046  | 0.0660 | 0.2543 | 0.0033 | 1358 | 39  | 1419 | 17 | 1460 | 17 | 93.0  | 1358       | 39 |
| LT24B-063 | 89  | 100 | 0.89 | 0.1236 | 0.0027 | 6.269  | 0.1400 | 0.3680 | 0.0050 | 2008 | 37  | 2014 | 20 | 2020 | 23 | 99.4  | 2008       | 37 |
| LT24B-064 | 122 | 378 | 0.32 | 0.1485 | 0.0030 | 8.880  | 0.1860 | 0.4337 | 0.0057 | 2329 | 33  | 2326 | 19 | 2322 | 25 | 100.3 | 2329       | 33 |
| LT24B-065 | 59  | 115 | 0.51 | 0.0609 | 0.0021 | 0.5910 | 0.0200 | 0.0704 | 0.0010 | 635  | 71  | 472  | 13 | 439  | 6  | 107.5 | 439        | 6  |
| LT24B-066 | 148 | 158 | 0.94 | 0.0580 | 0.0020 | 0.5320 | 0.0180 | 0.0665 | 0.0010 | 529  | 70  | 433  | 12 | 415  | 6  | 104.3 | 415        | 6  |
| LT24B-067 | 117 | 332 | 0.35 | 0.1101 | 0.0024 | 4.974  | 0.1090 | 0.3277 | 0.0043 | 1801 | 37  | 1815 | 18 | 1827 | 21 | 98.6  | 1801       | 37 |
| LT24B-068 | 26  | 46  | 0.57 | 0.0547 | 0.0038 | 0.3500 | 0.0240 | 0.0464 | 0.0009 | 399  | 147 | 304  | 18 | 292  | 6  | 104.1 | 292        | 6  |
| LT24B-069 | 47  | 104 | 0.46 | 0.0517 | 0.0023 | 0.3530 | 0.0160 | 0.0496 | 0.0008 | 273  | 98  | 307  | 12 | 312  | 5  | 98.4  | 312        | 5  |
| LT24B-070 | 180 | 692 | 0.26 | 0.0590 | 0.0014 | 0.7610 | 0.0180 | 0.0936 | 0.0012 | 565  | 47  | 574  | 10 | 577  | 7  | 99.5  | 577        | 7  |
| LT24B-071 | 166 | 120 | 1.39 | 0.1148 | 0.0026 | 5.403  | 0.1260 | 0.3413 | 0.0046 | 1877 | 39  | 1885 | 20 | 1893 | 22 | 99.2  | 1877       | 39 |
| LT24B-072 | 68  | 58  | 1.16 | 0.0705 | 0.0025 | 1.367  | 0.0470 | 0.1408 | 0.0022 | 942  | 67  | 875  | 20 | 849  | 12 | 103.1 | 849        | 12 |
| LT24B-073 | 180 | 397 | 0.45 | 0.1358 | 0.0030 | 4.944  | 0.1110 | 0.2642 | 0.0035 | 2174 | 36  | 1810 | 19 | 1511 | 18 | 143.9 | Discordant |    |
| LT24B-074 | 253 | 396 | 0.64 | 0.0535 | 0.0016 | 0.3480 | 0.0100 | 0.0472 | 0.0007 | 350  | 63  | 303  | 8  | 297  | 4  | 102.0 | 297        | 4  |
| LT24B-075 | 217 | 321 | 0.67 | 0.0670 | 0.0016 | 1.217  | 0.0300 | 0.1316 | 0.0018 | 839  | 48  | 808  | 14 | 797  | 10 | 101.4 | 797        | 10 |
| LT24B-076 | 21  | 55  | 0.37 | 0.0693 | 0.0025 | 1.339  | 0.0470 | 0.1402 | 0.0022 | 907  | 69  | 863  | 20 | 846  | 12 | 102.0 | 846        | 12 |
| LT24B-077 | 78  | 88  | 0.89 | 0.1144 | 0.0028 | 5.214  | 0.1290 | 0.3308 | 0.0046 | 1870 | 41  | 1855 | 21 | 1842 | 22 | 101.5 | 1870       | 41 |
| LT24B-078 | 114 | 243 | 0.47 | 0.0659 | 0.0017 | 1.285  | 0.0330 | 0.1415 | 0.0019 | 804  | 50  | 839  | 15 | 853  | 11 | 98.4  | 853        | 11 |
| LT24B-079 | 206 | 278 | 0.74 | 0.1190 | 0.0027 | 5.790  | 0.1340 | 0.3530 | 0.0047 | 1941 | 38  | 1945 | 20 | 1949 | 23 | 99.6  | 1941       | 38 |
| LT24B-080 | 62  | 79  | 0.79 | 0.1141 | 0.0029 | 5.358  | 0.1350 | 0.3407 | 0.0048 | 1866 | 43  | 1878 | 22 | 1890 | 23 | 98.7  | 1866       | 43 |
| LT24B-081 | 141 | 96  | 1.47 | 0.0542 | 0.0022 | 0.5410 | 0.0220 | 0.0724 | 0.0011 | 379  | 86  | 439  | 14 | 451  | 7  | 97.3  | 451        | 7  |
| LT24B-082 | 107 | 128 | 0.83 | 0.0563 | 0.0020 | 0.5600 | 0.0200 | 0.0722 | 0.0011 | 462  | 74  | 452  | 13 | 450  | 6  | 100.4 | 450        | 6  |
| LT24B-083 | 130 | 104 | 1.25 | 0.0554 | 0.0022 | 0.5400 | 0.0210 | 0.0708 | 0.0011 | 426  | 86  | 439  | 14 | 441  | 7  | 99.5  | 441        | 7  |
| LT24B-084 | 212 | 122 | 1.74 | 0.0947 | 0.0024 | 3.720  | 0.0950 | 0.2849 | 0.0040 | 1523 | 47  | 1576 | 20 | 1616 | 20 | 94.2  | 1523       | 47 |
| LT24B-085 | 144 | 250 | 0.58 | 0.0531 | 0.0019 | 0.3300 | 0.0120 | 0.0451 | 0.0007 | 334  | 78  | 290  | 9  | 284  | 4  | 102.1 | 284        | 4  |
| LT24B-086 | 53  | 129 | 0.41 | 0.1291 | 0.0031 | 6.903  | 0.1710 | 0.3880 | 0.0054 | 2085 | 42  | 2099 | 22 | 2114 | 25 | 98.6  | 2085       | 42 |
| LT24B-087 | 68  | 93  | 0.73 | 0.1326 | 0.0034 | 6.385  | 0.1660 | 0.3494 | 0.0050 | 2132 | 44  | 2030 | 23 | 1932 | 24 | 110.4 | Discordant |    |
| LT24B-088 | 37  | 100 | 0.37 | 0.1670 | 0.0041 | 10.895 | 0.2700 | 0.4734 | 0.0066 | 2527 | 40  | 2514 | 23 | 2498 | 29 | 101.2 | 2527       | 40 |
| LT24B-089 | 44  | 76  | 0.58 | 0.1068 | 0.0029 | 4.488  | 0.1210 | 0.3048 | 0.0044 | 1746 | 48  | 1729 | 22 | 1715 | 22 | 101.8 | 1746       | 48 |
| LT24B-090 | 36  | 70  | 0.52 | 0.1129 | 0.0030 | 5.246  | 0.1420 | 0.3371 | 0.0049 | 1847 | 48  | 1860 | 23 | 1873 | 23 | 98.6  | 1847       | 48 |
| LT24B-091 | 54  | 129 | 0.42 | 0.0506 | 0.0023 | 0.3090 | 0.0140 | 0.0444 | 0.0007 | 220  | 105 | 274  | 11 | 280  | 4  | 97.9  | 280        | 4  |
| LT24B-092 | 43  | 50  | 0.87 | 0.1388 | 0.0037 | 8.071  | 0.2190 | 0.4219 | 0.0062 | 2212 | 46  | 2239 | 24 | 2269 | 28 | 97.5  | 2212       | 46 |
| LT24B-093 | 388 | 338 | 1.15 | 0.0560 | 0.0017 | 0.5430 | 0.0160 | 0.0703 | 0.0010 | 454  | 65  | 440  | 11 | 438  | 6  | 100.5 | 438        | 6  |
| LT24B-094 | 41  | 49  | 0.85 | 0.0693 | 0.0028 | 1.307  | 0.0520 | 0.1369 | 0.0022 | 906  | 81  | 849  | 23 | 827  | 13 | 102.7 | 827        | 13 |
| LT24B-095 | 128 | 228 | 0.56 | 0.0676 | 0.0019 | 1.291  | 0.0360 | 0.1386 | 0.0020 | 856  | 57  | 842  | 16 | 837  | 11 | 100.6 | 837        | 11 |
| LT24B-096 | 100 | 222 | 0.45 | 0.0580 | 0.0019 | 0.5800 | 0.0190 | 0.0726 | 0.0011 | 528  | 70  | 464  | 12 | 452  | 6  | 102.7 | 452        | 6  |
| LT24B-097 | 40  | 116 | 0.34 | 0.1257 | 0.0033 | 6.841  | 0.1800 | 0.3949 | 0.0056 | 2038 | 45  | 2091 | 23 | 2146 | 26 | 95.0  | 2038       | 45 |
| LT24B-098 | 25  | 45  | 0.55 | 0.0532 | 0.0038 | 0.3540 | 0.0250 | 0.0483 | 0.0010 | 335  | 160 | 308  | 19 | 304  | 6  | 101.3 | 304        | 6  |
| LT24B-099 | 109 | 108 | 1.01 | 0.0576 | 0.0024 | 0.5870 | 0.0240 | 0.0739 | 0.0012 | 516  | 91  | 469  | 16 | 460  | 7  | 102.0 | 460        | 7  |
| LT24B-100 | 73  | 329 | 0.22 | 0.0843 | 0.0022 | 2.836  | 0.0750 | 0.2439 | 0.0034 | 1300 | 50  | 1365 | 20 | 1407 | 18 | 92.4  | 1300       | 50 |
| LT24B-101 | 67  | 143 | 0.46 | 0.0550 | 0.0020 | 0.5760 | 0.0210 | 0.0760 | 0.0012 | 413  | 81  | 462  | 14 | 472  | 7  | 97.9  | 472        | 7  |
| LT24B-102 | 63  | 110 | 0.57 | 0.0498 | 0.0024 | 0.3290 | 0.0160 | 0.0480 | 0.0008 | 185  | 109 | 289  | 12 | 302  | 5  | 95.7  | 302        | 5  |
| LT24B-103 | 67  | 101 | 0.66 | 0.0671 | 0.0022 | 1.346  | 0.0440 | 0.1456 | 0.0022 | 840  | 67  | 866  | 19 | 876  | 12 | 98.9  | 876        | 12 |
| LT24B-104 | 170 | 134 | 1.27 | 0.0545 | 0.0043 | 0.5320 | 0.0480 | 0.0707 | 0.0013 | 393  | 169 | 433  | 32 | 440  | 8  | 98.4  | 440        | 8  |
| LT24B-105 | 56  | 126 | 0.45 | 0.0625 | 0.0029 | 0.3760 | 0.0170 | 0.0436 | 0.0006 | 691  | 97  | 324  | 13 | 275  | 4  | 117.8 | Discordant |    |
| LT24B-106 | 276 | 400 | 0.69 | 0.0536 | 0.0017 | 0.3320 | 0.0100 | 0.0449 | 0.0006 | 352  | 71  | 291  | 8  | 283  | 3  | 102.8 | 283        | 3  |
| LT24B-107 | 113 | 179 | 0.63 | 0.0541 | 0.0022 | 0.3450 | 0.0140 | 0.0462 | 0.0006 | 376  | 88  | 301  | 10 | 291  | 4  | 103.4 | 291        | 4  |
| LT24B-108 | 69  | 149 | 0.47 | 0.0533 | 0.0023 | 0.3450 | 0.0150 | 0.0469 | 0.0007 | 343  | 96  | 301  | 11 | 295  | 4  | 102.0 | 295        | 4  |
| LT24B-109 | 30  | 82  | 0.37 | 0.0551 | 0.0033 | 0.3600 | 0.0210 | 0.0474 | 0.0008 | 418  | 133 | 312  | 16 | 298  | 5  | 104.7 | 298        | 5  |
| LT24B-110 | 23  | 40  | 0.58 | 0.0551 | 0.0055 | 0.3350 | 0.0330 | 0.0441 | 0.0010 | 416  | 218 | 293  | 25 | 278  | 6  | 105.4 | 278        | 6  |
| LT24B-111 | 291 | 351 | 0.83 | 0.0562 | 0.0018 | 0.5270 | 0.0160 | 0.0680 | 0.0009 | 461  | 69  | 430  | 11 | 424  | 5  | 101.4 | 424        | 5  |
| LT24B-112 | 43  | 90  | 0.48 | 0.0595 | 0.0041 | 0.3720 | 0.0270 | 0.0454 | 0.0008 | 584  | 147 | 321  | 20 | 286  | 5  | 112.2 | Discordant |    |
| LT24B-113 | 46  | 92  | 0.50 | 0.0607 | 0.0057 | 0.3910 | 0.0380 | 0.0468 | 0.0010 | 629  | 201 | 335  | 28 | 295  | 6  | 113.6 | Discordant |    |
| LT24B-114 | 66  | 84  | 0.79 | 0.0710 | 0.0026 | 1.352  | 0.0490 | 0.1380 | 0.0019 | 958  | 75  | 868  | 21 | 833  | 11 | 104.2 | 833        | 11 |
| LT24B-115 | 23  | 40  | 0.57 | 0.0528 | 0.0050 | 0.3700 | 0.0340 | 0.0508 | 0.0011 | 320  | 208 | 320  | 25 | 319  | 7  | 100.3 | 319        | 7  |
| LT24B-116 | 142 | 111 | 1.29 | 0.0557 | 0.0025 | 0.5540 | 0.0240 | 0.0721 | 0.0011 | 441  | 97  | 447  | 16 | 448  | 6  | 99.8  | 448        | 6  |
| LT24B-117 | 61  | 126 | 0.48 | 0.0553 | 0.0028 | 0.3620 | 0.0180 | 0.0474 | 0.0008 | 424  | 112 | 314  | 14 | 299  | 5  | 105.0 | 299        | 5  |
| LT24B-118 | 38  | 82  | 0.47 | 0.0555 | 0.0032 | 0.3570 | 0.0200 | 0.0466 | 0.0008 | 434  | 128 | 310  | 15 | 294  | 5  | 105.4 | 294        | 5  |

Sample LT18A, quartz arenite, Early Permian Kupukuziman Formation in Keping-Subashi section of northern Tarim, (Han et al., 2016, Lithos)

|           |     |     |      |        |        |       |        |        |        |      |    |      |    |      |    |       |            |    |
|-----------|-----|-----|------|--------|--------|-------|--------|--------|--------|------|----|------|----|------|----|-------|------------|----|
| LT18A-001 | 234 | 325 | 0.72 | 0.0732 | 0.0014 | 1.681 | 0.0310 | 0.1667 | 0.0020 | 1018 | 36 | 1001 | 12 | 994  | 11 | 100.7 | 994        | 11 |
| LT18A-002 | 3   | 139 | 0.02 | 0.1188 | 0.0024 | 4.453 | 0.0920 | 0.2719 | 0.0035 | 1939 | 35 | 1722 | 17 | 1550 | 18 | 125.1 | Discordant |    |



|           |     |     |      |        |        |        |        |        |        |      |     |      |    |      |    |       |            |    |
|-----------|-----|-----|------|--------|--------|--------|--------|--------|--------|------|-----|------|----|------|----|-------|------------|----|
| LT18A-051 | 50  | 209 | 0.24 | 0.0907 | 0.0019 | 2.803  | 0.0600 | 0.2240 | 0.0029 | 1441 | 38  | 1356 | 16 | 1303 | 15 | 110.6 | Discordant |    |
| LT18A-052 | 120 | 235 | 0.51 | 0.0669 | 0.0015 | 1.253  | 0.0290 | 0.1357 | 0.0018 | 835  | 44  | 825  | 13 | 820  | 10 | 100.6 | 820        | 10 |
| LT18A-053 | 395 | 233 | 1.69 | 0.0621 | 0.0017 | 0.8600 | 0.0240 | 0.1003 | 0.0014 | 679  | 56  | 630  | 13 | 616  | 8  | 102.3 | 616        | 8  |
| LT18A-054 | 415 | 610 | 0.68 | 0.0514 | 0.0013 | 0.3450 | 0.0090 | 0.0487 | 0.0007 | 259  | 57  | 301  | 7  | 307  | 4  | 98.0  | 307        | 4  |
| LT18A-055 | 39  | 45  | 0.89 | 0.0609 | 0.0032 | 0.8600 | 0.0440 | 0.1023 | 0.0018 | 637  | 107 | 630  | 24 | 628  | 11 | 100.3 | 628        | 11 |
| LT18A-056 | 271 | 316 | 0.86 | 0.0535 | 0.0015 | 0.4870 | 0.0130 | 0.0660 | 0.0009 | 350  | 59  | 403  | 9  | 412  | 5  | 97.8  | 412        | 5  |
| LT18A-057 | 105 | 240 | 0.44 | 0.0669 | 0.0015 | 1.277  | 0.0300 | 0.1384 | 0.0018 | 835  | 45  | 836  | 13 | 835  | 10 | 100.1 | 835        | 10 |
| LT18A-058 | 111 | 266 | 0.42 | 0.0550 | 0.0021 | 0.3460 | 0.0150 | 0.0456 | 0.0007 | 413  | 82  | 302  | 12 | 287  | 4  | 105.2 | 287        | 4  |
| LT18A-059 | 129 | 237 | 0.55 | 0.0744 | 0.0017 | 1.787  | 0.0420 | 0.1741 | 0.0023 | 1052 | 44  | 1041 | 15 | 1035 | 13 | 101.6 | 1052       | 44 |
| LT18A-060 | 68  | 112 | 0.61 | 0.0674 | 0.0018 | 1.415  | 0.0390 | 0.1522 | 0.0021 | 850  | 54  | 895  | 16 | 913  | 12 | 98.0  | 913        | 12 |
| LT18A-061 | 413 | 748 | 0.55 | 0.0555 | 0.0014 | 0.3660 | 0.0090 | 0.0478 | 0.0006 | 431  | 53  | 316  | 7  | 301  | 4  | 105.0 | 301        | 4  |
| LT18A-062 | 278 | 424 | 0.66 | 0.0539 | 0.0015 | 0.3700 | 0.0100 | 0.0497 | 0.0007 | 368  | 60  | 319  | 8  | 313  | 4  | 101.9 | 313        | 4  |
| LT18A-063 | 40  | 289 | 0.14 | 0.0661 | 0.0016 | 1.374  | 0.0340 | 0.1507 | 0.0020 | 809  | 48  | 878  | 14 | 905  | 11 | 97.0  | 905        | 11 |
| LT18A-064 | 180 | 164 | 1.09 | 0.0945 | 0.0021 | 3.466  | 0.0800 | 0.2660 | 0.0036 | 1517 | 40  | 1520 | 18 | 1521 | 18 | 99.7  | 1517       | 40 |
| LT18A-065 | 84  | 236 | 0.36 | 0.0680 | 0.0017 | 1.367  | 0.0340 | 0.1457 | 0.0020 | 869  | 48  | 875  | 15 | 877  | 11 | 99.8  | 877        | 11 |
| LT18A-066 | 218 | 187 | 1.17 | 0.0610 | 0.0017 | 0.8230 | 0.0230 | 0.0978 | 0.0014 | 639  | 58  | 610  | 13 | 602  | 8  | 101.3 | 602        | 8  |
| LT18A-067 | 280 | 179 | 1.56 | 0.0640 | 0.0022 | 0.6140 | 0.0210 | 0.0696 | 0.0010 | 741  | 69  | 486  | 13 | 434  | 6  | 112.0 | Discordant |    |
| LT18A-068 | 52  | 88  | 0.59 | 0.1633 | 0.0036 | 10.537 | 0.2420 | 0.4678 | 0.0064 | 2490 | 36  | 2483 | 21 | 2474 | 28 | 100.6 | 2490       | 36 |
| LT18A-069 | 57  | 158 | 0.36 | 0.0830 | 0.0021 | 2.618  | 0.0670 | 0.2285 | 0.0032 | 1270 | 48  | 1306 | 19 | 1327 | 17 | 95.7  | 1270       | 48 |
| LT18A-070 | 82  | 182 | 0.45 | 0.1369 | 0.0030 | 6.516  | 0.1480 | 0.3449 | 0.0047 | 2189 | 37  | 2048 | 20 | 1910 | 22 | 114.6 | Discordant |    |
| LT18A-071 | 70  | 206 | 0.34 | 0.0576 | 0.0017 | 0.6210 | 0.0180 | 0.0781 | 0.0011 | 515  | 63  | 490  | 11 | 485  | 7  | 101.0 | 485        | 7  |
| LT18A-072 | 157 | 209 | 0.75 | 0.0547 | 0.0018 | 0.4030 | 0.0140 | 0.0535 | 0.0008 | 399  | 73  | 344  | 10 | 336  | 5  | 102.4 | 336        | 5  |
| LT18A-073 | 134 | 215 | 0.62 | 0.1633 | 0.0035 | 10.891 | 0.2460 | 0.4834 | 0.0065 | 2490 | 35  | 2514 | 21 | 2542 | 28 | 98.0  | 2490       | 35 |
| LT18A-074 | 167 | 198 | 0.84 | 0.0558 | 0.0017 | 0.5840 | 0.0180 | 0.0759 | 0.0011 | 445  | 66  | 467  | 12 | 471  | 6  | 99.2  | 471        | 6  |
| LT18A-075 | 151 | 218 | 0.69 | 0.0765 | 0.0018 | 2.156  | 0.0540 | 0.2044 | 0.0028 | 1107 | 47  | 1167 | 17 | 1199 | 15 | 92.3  | 1107       | 47 |
| LT18A-076 | 84  | 186 | 0.45 | 0.0739 | 0.0019 | 1.829  | 0.0490 | 0.1794 | 0.0025 | 1039 | 51  | 1056 | 17 | 1064 | 14 | 97.7  | 1039       | 51 |
| LT18A-077 | 110 | 240 | 0.46 | 0.1102 | 0.0025 | 5.460  | 0.1290 | 0.3590 | 0.0049 | 1803 | 40  | 1894 | 20 | 1878 | 23 | 91.2  | 1803       | 40 |
| LT18A-078 | 100 | 226 | 0.44 | 0.0504 | 0.0018 | 0.3340 | 0.0120 | 0.0480 | 0.0007 | 212  | 81  | 292  | 9  | 302  | 4  | 96.7  | 302        | 4  |
| LT18A-079 | 119 | 79  | 1.51 | 0.0672 | 0.0023 | 1.191  | 0.0400 | 0.1284 | 0.0019 | 845  | 68  | 797  | 19 | 779  | 11 | 102.3 | 779        | 11 |
| LT18A-080 | 141 | 159 | 0.89 | 0.0650 | 0.0018 | 1.221  | 0.0350 | 0.1361 | 0.0019 | 774  | 57  | 810  | 16 | 823  | 11 | 98.4  | 823        | 11 |
| LT18A-081 | 113 | 136 | 0.83 | 0.0912 | 0.0022 | 3.467  | 0.0880 | 0.2755 | 0.0039 | 1451 | 46  | 1520 | 20 | 1569 | 19 | 92.5  | 1451       | 46 |
| LT18A-082 | 59  | 191 | 0.31 | 0.0814 | 0.0020 | 2.871  | 0.0740 | 0.2557 | 0.0036 | 1231 | 48  | 1374 | 19 | 1468 | 18 | 83.9  | Discordant |    |
| LT18A-083 | 93  | 113 | 0.82 | 0.0581 | 0.0035 | 0.6160 | 0.0430 | 0.0769 | 0.0014 | 535  | 129 | 488  | 27 | 478  | 8  | 102.1 | 478        | 8  |
| LT18A-084 | 42  | 91  | 0.46 | 0.0493 | 0.0024 | 0.3240 | 0.0150 | 0.0476 | 0.0008 | 163  | 106 | 285  | 12 | 300  | 5  | 95.0  | 300        | 5  |
| LT18A-085 | 125 | 130 | 0.96 | 0.0559 | 0.0020 | 0.5970 | 0.0220 | 0.0774 | 0.0012 | 448  | 78  | 475  | 14 | 481  | 7  | 98.8  | 481        | 7  |
| LT18A-086 | 81  | 177 | 0.46 | 0.0891 | 0.0023 | 2.438  | 0.0650 | 0.1984 | 0.0028 | 1406 | 48  | 1254 | 19 | 1167 | 15 | 120.5 | Discordant |    |
| LT18A-087 | 169 | 365 | 0.46 | 0.0722 | 0.0018 | 1.405  | 0.0370 | 0.1411 | 0.0020 | 990  | 50  | 891  | 16 | 851  | 11 | 104.7 | 851        | 11 |
| LT18A-088 | 13  | 33  | 0.38 | 0.2180 | 0.0055 | 17.564 | 0.4620 | 0.5839 | 0.0088 | 2966 | 40  | 2966 | 25 | 2965 | 36 | 100.0 | 2966       | 40 |
| LT18A-089 | 63  | 104 | 0.60 | 0.1202 | 0.0030 | 6.204  | 0.1630 | 0.3742 | 0.0054 | 1959 | 44  | 2005 | 23 | 2049 | 25 | 95.6  | 1959       | 44 |
| LT18A-090 | 42  | 47  | 0.90 | 0.0729 | 0.0027 | 1.668  | 0.0620 | 0.1659 | 0.0027 | 1010 | 71  | 996  | 24 | 989  | 15 | 100.7 | 989        | 15 |
| LT18A-091 | 89  | 177 | 0.50 | 0.0529 | 0.0020 | 0.3590 | 0.0140 | 0.0492 | 0.0008 | 322  | 83  | 312  | 10 | 310  | 5  | 100.6 | 310        | 5  |
| LT18A-092 | 183 | 214 | 0.86 | 0.0636 | 0.0018 | 1.201  | 0.0340 | 0.1368 | 0.0020 | 729  | 56  | 801  | 16 | 827  | 11 | 96.9  | 827        | 11 |
| LT18A-093 | 78  | 83  | 0.94 | 0.0682 | 0.0023 | 1.132  | 0.0390 | 0.1202 | 0.0019 | 876  | 66  | 769  | 19 | 731  | 11 | 105.2 | 731        | 11 |
| LT18A-094 | 147 | 251 | 0.59 | 0.0549 | 0.0017 | 0.5340 | 0.0170 | 0.0706 | 0.0010 | 407  | 64  | 435  | 11 | 440  | 6  | 98.9  | 440        | 6  |
| LT18A-095 | 51  | 105 | 0.49 | 0.0554 | 0.0021 | 0.5670 | 0.0220 | 0.0742 | 0.0012 | 427  | 81  | 456  | 14 | 461  | 7  | 98.9  | 461        | 7  |
| LT18A-096 | 38  | 103 | 0.37 | 0.0546 | 0.0025 | 0.3690 | 0.0170 | 0.0490 | 0.0008 | 397  | 98  | 319  | 13 | 308  | 5  | 103.6 | 308        | 5  |
| LT18A-097 | 104 | 231 | 0.45 | 0.0525 | 0.0018 | 0.3570 | 0.0130 | 0.0493 | 0.0008 | 308  | 75  | 310  | 9  | 310  | 5  | 100.0 | 310        | 5  |
| LT18A-098 | 95  | 211 | 0.45 | 0.0535 | 0.0018 | 0.5740 | 0.0200 | 0.0777 | 0.0012 | 349  | 71  | 460  | 13 | 483  | 7  | 95.2  | 483        | 7  |
| LT18A-099 | 122 | 214 | 0.57 | 0.0523 | 0.0019 | 0.3680 | 0.0130 | 0.0511 | 0.0008 | 299  | 77  | 318  | 10 | 321  | 5  | 99.1  | 321        | 5  |
| LT18A-100 | 169 | 256 | 0.66 | 0.0666 | 0.0019 | 1.337  | 0.0390 | 0.1455 | 0.0021 | 825  | 56  | 862  | 17 | 876  | 12 | 98.4  | 876        | 12 |
| LT18A-101 | 240 | 252 | 0.95 | 0.0577 | 0.0018 | 0.6080 | 0.0190 | 0.0764 | 0.0011 | 517  | 64  | 482  | 12 | 475  | 7  | 101.5 | 475        | 7  |
| LT18A-102 | 110 | 99  | 1.12 | 0.0977 | 0.0028 | 4.171  | 0.1230 | 0.3095 | 0.0047 | 1580 | 50  | 1668 | 24 | 1738 | 23 | 90.9  | 1580       | 50 |
| LT18A-103 | 150 | 288 | 0.52 | 0.0518 | 0.0017 | 0.3500 | 0.0120 | 0.0489 | 0.0007 | 275  | 72  | 304  | 9  | 308  | 5  | 98.7  | 308        | 5  |

Sample 91-Si-4, sandstone, Early Permian Kupukuziman Formation in Aksu area of northwestern Tarim, (Carroll et al., 2013, International Geology Review)

|           |      |      |        |        |        |        |        |        |        |      |      |     |      |    |       |            |    |
|-----------|------|------|--------|--------|--------|--------|--------|--------|--------|------|------|-----|------|----|-------|------------|----|
| 91Si-4-1  | 546  | 0.59 | 0.0515 | 0.0019 | 0.3335 | 0.0140 | 0.0470 | 0.0009 | 262    | 85   | 292  | 11  | 296  | 6  | 98.7  | 296        | 6  |
| 91Si-4-2  | 436  | 0.71 | 0.0522 | 0.0026 | 0.3423 | 0.0171 | 0.0475 | 0.0005 | 296    | 111  | 299  | 13  | 299  | 3  | 99.9  | 299        | 3  |
| 91Si-4-3  | 137  | 0.45 | 0.0540 | 0.0057 | 0.3343 | 0.0354 | 0.0449 | 0.0007 | 372    | 236  | 293  | 27  | 283  | 4  | 103.5 | 283        | 4  |
| 91Si-4-4  | 108  | 0.42 | 0.0474 | 0.0074 | 0.2903 | 0.0456 | 0.0444 | 0.0010 | 71     | 371  | 259  | 36  | 280  | 6  | 92.5  | 280        | 6  |
| 91Si-4-5  | 173  | 0.48 | 0.0522 | 0.0068 | 0.3253 | 0.0429 | 0.0452 | 0.0012 | 292    | 297  | 286  | 33  | 285  | 7  | 100.2 | 285        | 7  |
| 91Si-4-6  | 90   | 0.56 | 0.0528 | 0.0110 | 0.3200 | 0.0669 | 0.0439 | 0.0010 | 322    | 477  | 282  | 52  | 277  | 6  | 101.7 | 277        | 6  |
| 91Si-4-7  | 181  | 0.59 | 0.0486 | 0.0068 | 0.2950 | 0.0413 | 0.0440 | 0.0007 | 129    | 328  | 263  | 32  | 278  | 5  | 94.6  | 278        | 5  |
| 91Si-4-8  | 81   | 0.63 | 0.0517 | 0.0102 | 0.3115 | 0.0623 | 0.0437 | 0.0013 | 272    | 456  | 275  | 48  | 276  | 8  | 99.9  | 276        | 8  |
| 91Si-4-9  | 146  | 0.42 | 0.0658 | 0.0202 | 0.4124 | 0.1291 | 0.0454 | 0.0028 | 802    | 658  | 351  | 93  | 286  | 17 | 122.5 | Discordant |    |
| 91Si-4-10 | 208  | 0.56 | 0.0726 | 0.0023 | 1.384  | 0.0540 | 0.1382 | 0.0032 | 1004   | 64   | 882  | 23  | 835  | 18 | 105.7 | 835        | 18 |
| 91Si-4-11 | 193  | 0.48 | 0.0529 | 0.0030 | 0.3290 | 0.0197 | 0.0451 | 0.0009 | 323    | 126  | 289  | 15  | 285  | 6  | 101.5 | 285        | 6  |
| 91Si-4-13 | 60   | 0.45 | 0.0387 | 0.0152 | 0.2318 | 0.0916 | 0.0435 | 0.0012 | (440)  | 1071 | 212  | 76  | 275  | 7  | 77.1  | Discordant |    |
| 91Si-4-14 | 122  | 0.63 | 0.0478 | 0.0091 | 0.2737 | 0.0567 | 0.0415 | 0.0034 | 90     | 455  | 246  | 45  | 262  | 21 | 93.7  | 262        | 21 |
| 91Si-4-15 | 147  | 0.48 | 0.0612 | 0.0097 | 0.3754 | 0.0597 | 0.0445 | 0.0008 | 646    | 341  | 324  | 44  | 281  | 5  | 115.3 | Discordant |    |
| 91Si-4-16 | 127  | 0.50 | 0.0490 | 0.0077 | 0.3078 | 0.0486 | 0.0456 | 0.0007 | 148    | 370  | 273  | 38  | 287  | 4  | 94.8  | 287        | 4  |
| 91Si-4-17 | 369  | 0.32 | 0.0512 | 0.0027 | 0.3214 | 0.0174 | 0.0455 | 0.0005 | 252    | 122  | 283  | 13  | 287  | 4  | 98.7  | 287        | 4  |
| 91Si-4-18 | 261  | 0.50 | 0.0494 | 0.0038 | 0.3079 | 0.0246 | 0.0452 | 0.0010 | 169    | 178  | 273  | 19  | 285  | 6  | 95.7  | 285        | 6  |
| 91Si-4-19 | 454  | 0.67 | 0.0528 | 0.0016 | 0.3333 | 0.0123 | 0.0458 | 0.0010 | 318    | 70   | 292  | 10  | 289  | 6  | 101.1 | 289        | 6  |
| 91Si-4-20 | 121  | 0.56 | 0.0500 | 0.0084 | 0.3021 | 0.0520 | 0.0438 | 0.0016 | 193    | 394  | 268  | 41  | 277  | 10 | 96.9  | 277        | 10 |
| 91Si-4-21 | 110  | 0.53 | 0.0490 | 0.0115 | 0.3042 | 0.0733 | 0.0450 | 0.0025 | 147    | 556  | 270  | 57  | 284  | 15 | 95.0  | 284        | 15 |
| 91Si-4-22 | 124  | 0.42 | 0.0501 | 0.0041 | 0.3111 | 0.0271 | 0.0450 | 0.0014 | 200    | 189  | 275  | 21  | 284  | 9  | 96.9  | 284        | 9  |
| 91Si-4-23 | 680  | 0.71 | 0.0522 | 0.0013 | 0.3337 | 0.0087 | 0.0463 | 0.0003 | 296    | 57   | 292  | 7   | 292  | 2  | 100.2 | 292        | 2  |
| 91Si-4-24 | 40   | 0.43 | 0.0313 | 0.0261 | 0.1967 | 0.1640 | 0.0456 | 0.0007 | (1033) | 1363 | 182  | 140 | 288  | 4  | 63.4  | Discordant |    |
| 91Si-4-25 | 539  | 0.56 | 0.0526 | 0.0026 | 0.3342 | 0.0184 | 0.0461 | 0.0011 | 311    | 112  | 293  | 14  | 291  | 7  | 100.8 | 291        | 7  |
| 91Si-4-26 | 160  | 0.67 | 0.0490 | 0.0046 | 0.2923 | 0.0281 | 0.0433 | 0.0010 | 147    | 219  | 260  | 22  | 273  | 6  | 95.3  | 273        | 6  |
| 91Si-4-27 | 339  | 0.53 | 0.0524 | 0.0029 | 0.3325 | 0.0190 | 0.0460 | 0.0008 | 303    | 125  | 292  | 15  | 290  | 5  | 100.5 | 290        | 5  |
| 91Si-4-28 | 103  | 0.53 | 0.0486 | 0.0079 | 0.2966 | 0.0486 | 0.0443 | 0.0011 | 128    | 383  | 264  | 38  | 279  | 7  | 94.4  | 279        | 7  |
| 91Si-4-29 | 17   | 1.25 | 0.0387 | 0.0197 | 0.3582 | 0.1848 | 0.0671 | 0.0062 | (435)  | 1414 | 311  | 139 | 419  | 38 | 74.3  | Discordant |    |
| 91Si-4-31 | 110  | 0.45 | 0.0570 | 0.0042 | 0.3521 | 0.0275 | 0.0448 | 0.0011 | 493    | 162  | 306  | 21  | 282  | 7  | 108.5 | 282        | 7  |
| 91Si-4-32 | 94   | 0.45 | 0.0502 | 0.0136 | 0.2973 | 0.0809 | 0.0430 | 0.0014 | 202    | 638  | 264  | 64  | 271  | 9  | 97.4  | 271        | 9  |
| 91Si-4-33 | 86   | 0.59 | 0.0423 | 0.0148 | 0.2537 | 0.0901 | 0.0435 | 0.0026 | (207)  | 902  | 230  | 73  | 274  | 16 | 83.7  | Discordant |    |
| 91Si-4-34 | 177  | 0.45 | 0.0525 | 0.0035 | 0.3328 | 0.0226 | 0.0460 | 0.0007 | 306    | 152  | 292  | 17  | 290  | 4  | 100.6 | 290        | 4  |
| 91Si-4-36 | 592  | 0.71 | 0.0547 | 0.0007 | 0.4933 | 0.0094 | 0.0655 | 0.0009 | 398    | 28   | 407  | 6   | 409  | 6  | 99.6  | 409        | 6  |
| 91Si-4-37 | 98   | 0.42 | 0.0491 | 0.0072 | 0.3032 | 0.0446 | 0.0448 | 0.0006 | 154    | 345  | 269  | 35  | 282  | 4  | 95.3  | 282        | 4  |
| 91Si-4-38 | 127  | 0.59 | 0.0510 | 0.0050 | 0.3234 | 0.0327 | 0.0460 | 0.0011 | 241    | 227  | 285  | 25  | 290  | 7  | 98.2  | 290        | 7  |
| 91Si-4-39 | 552  | 0.67 | 0.0505 | 0.0016 | 0.3112 | 0.0118 | 0.0447 | 0.0009 | 218    | 74   | 275  | 9   | 282  | 6  | 97.6  | 282        | 6  |
| 91Si-4-40 | 29   | 0.45 | 0.0942 | 0.1735 | 0.6239 | 0.9655 | 0.0403 | 0.0026 | 1512   | 431  | 428  | 759 | 255  | 16 | 167.8 | Discordant |    |
| 91Si-4-41 | 113  | 0.50 | 0.0545 | 0.0057 | 0.3319 | 0.0358 | 0.0442 | 0.0012 | 392    | 235  | 291  | 27  | 279  | 8  | 104.5 | 279        | 8  |
| 91Si-4-42 | 236  | 0.59 | 0.0502 | 0.0037 | 0.3009 | 0.0226 | 0.0435 | 0.0004 | 206    | 172  | 267  | 18  | 274  | 2  | 97.4  | 274        | 2  |
| 91Si-4-43 | 68   | 1.00 | 0.1202 | 0.0018 | 5.765  | 0.1038 | 0.3479 | 0.0031 | 1959   | 27   | 1941 | 15  | 1925 | 15 | 101.8 | 1959       | 27 |
| 91Si-4-44 | 330  | 0.45 | 0.0509 | 0.0029 | 0.3203 | 0.0195 | 0.0456 | 0.0010 | 239    | 132  | 282  | 15  | 287  | 6  | 98.2  | 287        | 6  |
| 91Si-4-45 | 134  | 0.42 | 0.0499 | 0.0042 | 0.3138 | 0.0270 | 0.0457 | 0.0005 | 188    | 199  | 277  | 21  | 288  | 3  | 96.3  | 288        | 3  |
| 91Si-4-47 | 234  | 0.43 | 0.0507 | 0.0031 | 0.3350 | 0.0221 | 0.0479 | 0.0012 | 227    | 142  | 293  | 17  | 302  | 7  | 97.2  | 302        | 7  |
| 91Si-4-48 | 104  | 0.45 | 0.0473 | 0.0203 | 0.2850 | 0.1226 | 0.0437 | 0.0007 | 65     | 1069 | 255  | 97  | 276  | 4  | 92.3  | 276        | 4  |
| 91Si-4-50 | 300  | 0.53 | 0.0516 | 0.0029 | 0.3201 | 0.0182 | 0.0450 | 0.0003 | 268    | 129  | 282  | 14  | 284  | 2  | 99.4  | 284        | 2  |
| 91Si-4-51 | 110  | 0.53 | 0.0455 | 0.0057 | 0.2761 | 0.0348 | 0.0440 | 0.0007 | (30)   | 304  | 248  | 28  | 278  | 4  | 89.1  | Discordant |    |
| 91Si-4-52 | 642  | 0.59 | 0.0524 | 0.0010 | 0.3336 | 0.0083 | 0.0462 | 0.0007 | 302    | 46   | 292  | 6   | 291  | 4  | 100.4 | 291        | 4  |
| 91Si-4-53 | 251  | 0.53 | 0.0482 | 0.0074 | 0.3039 | 0.0468 | 0.0457 | 0.0005 | 111    | 365  | 270  | 37  | 288  | 3  | 93.5  | 288        | 3  |
| 91Si-4-54 | 74   | 0.45 | 0.0455 | 0.0051 | 0.2815 | 0.0329 | 0.0449 | 0.0013 | (30)   | 274  | 252  | 26  | 283  | 8  | 88.9  | Discordant |    |
| 91Si-4-55 | 271  | 0.45 | 0.0678 | 0.0015 | 1.186  | 0.0415 | 0.1269 | 0.0034 | 863    | 46   | 794  | 19  | 770  | 20 | 103.1 | 770        | 20 |
| 91Si-4-56 | 95   | 1.11 | 0.1202 | 0.0018 | 5.809  | 0.1104 | 0.3504 | 0.0039 | 1960   | 27   | 1948 | 16  | 1936 | 18 | 101.2 | 1960       | 27 |
| 91Si-4-58 | 176  | 0.48 | 0.0455 | 0.0057 | 0.2851 | 0.0362 | 0.0455 | 0.0010 | (30)   | 303  | 255  | 29  | 287  | 6  | 88.8  | Discordant |    |
| 91Si-4-59 | 686  | 0.63 | 0.0534 | 0.0012 | 0.3423 | 0.0092 | 0.0465 | 0.0007 | 345    | 49   | 299  | 7   | 293  | 5  | 102.0 | 293        | 5  |
| 91Si-4-60 | 135  | 0.50 | 0.0513 | 0.0043 | 0.3244 | 0.0276 | 0.0458 | 0.0005 | 257    | 194  | 285  | 21  | 289  | 3  | 98.8  | 289        | 3  |
| 91Si-4-60 | 545  | 0.26 | 0.0594 | 0.0005 | 0.7428 | 0.0097 | 0.0907 | 0.0009 | 582    | 19   | 564  | 6   | 560  | 5  | 100.8 | 560        | 5  |
| 91Si-4-61 | 219  | 0.50 | 0.0509 | 0.0048 | 0.3363 | 0.0346 | 0.0479 | 0.0020 | 239    | 218  | 294  | 26  | 301  | 12 | 97.6  | 301        | 12 |
| 91Si-4-63 | 1163 | 0.83 | 0.0530 | 0.0007 | 0.3443 | 0.0083 | 0.0471 | 0.0009 | 328    | 29   | 300  | 6   | 297  | 6  | 101.2 | 297        | 6  |
| 91Si-4-64 | 179  | 0.67 | 0.0607 | 0.0013 | 0.8130 | 0.0301 | 0.0972 | 0.0028 | 627    | 48   | 604  | 17  | 598  | 17 | 101.0 | 598        | 17 |
| 91Si-4-65 | 369  | 0.63 | 0.0522 | 0.0021 | 0.3238 | 0.0142 | 0.0450 | 0.0007 | 293    | 94   | 285  | 11  | 284  | 4  | 100.4 | 284        | 4  |
| 91Si-4-67 | 287  | 0.42 | 0.0558 | 0.0050 | 0.3557 | 0.0331 | 0.0462 | 0.0011 | 444    | 199  | 309  | 25  | 291  | 7  | 106.0 | 291        | 7  |
| 91Si-4-68 | 251  | 0.59 | 0.0504 | 0.0060 | 0.3101 | 0.0375 | 0.0446 | 0.0008 | 213    | 277  | 274  | 29  | 282  | 5  | 97.4  | 282        | 5  |
| 91Si-4-69 | 142  | 0.56 | 0.0494 | 0.0058 | 0.3066 | 0.0365 | 0.0450 | 0.0007 | 169    | 277  | 272  | 28  | 284  | 4  | 95.7  | 284        | 4  |
| 91Si-4-71 | 182  | 0.00 | 0.0660 | 0.0018 | 1.144  | 0.0343 | 0.1257 | 0.0014 | 807    | 58   | 775  | 16  | 763  | 8  | 101.5 | 763        | 8  |
| 91Si-4-72 | 110  | 0.45 | 0.0579 | 0.0086 | 0.3564 | 0.0535 | 0.0446 | 0.0010 | 527    | 326  | 310  | 40  | 281  | 6  | 110.0 | 281        | 6  |

|            |     |      |        |        |        |        |        |        |       |     |      |    |      |    |       |            |    |
|------------|-----|------|--------|--------|--------|--------|--------|--------|-------|-----|------|----|------|----|-------|------------|----|
| 91SI-4-73  | 139 | 0.50 | 0.0512 | 0.0082 | 0.3190 | 0.0517 | 0.0452 | 0.0012 | 250   | 369 | 281  | 40 | 285  | 7  | 98.7  | 285        | 7  |
| 91SI-4-74  | 272 | 1.67 | 0.0581 | 0.0031 | 0.5440 | 0.0310 | 0.0679 | 0.0014 | 532   | 118 | 441  | 21 | 424  | 8  | 104.1 | 424        | 8  |
| 91SI-4-75  | 247 | 0.53 | 0.0521 | 0.0028 | 0.3316 | 0.0186 | 0.0461 | 0.0008 | 292   | 122 | 291  | 14 | 291  | 5  | 100.0 | 291        | 5  |
| 91SI-4-76  | 109 | 0.48 | 0.0502 | 0.0082 | 0.3314 | 0.0547 | 0.0479 | 0.0010 | 202   | 382 | 291  | 42 | 302  | 6  | 96.3  | 302        | 6  |
| 91SI-4-77  | 106 | 0.53 | 0.0478 | 0.0080 | 0.2900 | 0.0490 | 0.0440 | 0.0010 | 88    | 400 | 259  | 39 | 278  | 6  | 93.1  | 278        | 6  |
| 91SI-4-78  | 75  | 0.63 | 0.0521 | 0.0058 | 0.3186 | 0.0360 | 0.0444 | 0.0005 | 288   | 257 | 281  | 28 | 280  | 3  | 100.3 | 280        | 3  |
| 91SI-4-79  | 112 | 0.50 | 0.0471 | 0.0058 | 0.2859 | 0.0363 | 0.0440 | 0.0012 | 53    | 296 | 255  | 29 | 278  | 8  | 91.9  | 278        | 8  |
| 91SI-4-80  | 95  | 0.48 | 0.0477 | 0.0126 | 0.2968 | 0.0784 | 0.0451 | 0.0005 | 86    | 634 | 264  | 61 | 284  | 3  | 92.8  | 284        | 3  |
| 91SI-4-81  | 180 | 0.40 | 0.0517 | 0.0017 | 0.3299 | 0.0129 | 0.0463 | 0.0009 | 272   | 75  | 290  | 10 | 292  | 6  | 99.3  | 292        | 6  |
| 91SI-4-82  | 161 | 1.43 | 0.0529 | 0.0040 | 0.5055 | 0.0389 | 0.0693 | 0.0010 | 326   | 172 | 415  | 26 | 432  | 6  | 96.2  | 432        | 6  |
| 91SI-4-83  | 202 | 0.56 | 0.0531 | 0.0055 | 0.3244 | 0.0344 | 0.0443 | 0.0011 | 331   | 234 | 285  | 26 | 280  | 7  | 102.0 | 280        | 7  |
| 91SI-4-84  | 406 | 0.63 | 0.0550 | 0.0038 | 0.3501 | 0.0266 | 0.0462 | 0.0013 | 411   | 158 | 305  | 20 | 291  | 8  | 104.7 | 291        | 8  |
| 91SI-4-85  | 307 | 0.56 | 0.0513 | 0.0025 | 0.3188 | 0.0163 | 0.0451 | 0.0007 | 254   | 112 | 281  | 13 | 284  | 4  | 98.9  | 284        | 4  |
| 91SI-4-86  | 109 | 0.53 | 0.0544 | 0.0047 | 0.3388 | 0.0339 | 0.0451 | 0.0022 | 389   | 196 | 296  | 26 | 285  | 14 | 104.1 | 285        | 14 |
| 91SI-4-87  | 82  | 0.45 | 0.0501 | 0.0098 | 0.3101 | 0.0614 | 0.0449 | 0.0017 | 201   | 456 | 274  | 48 | 283  | 10 | 96.9  | 283        | 10 |
| 91SI-4-88  | 179 | 0.67 | 0.0535 | 0.0059 | 0.3298 | 0.0369 | 0.0447 | 0.0005 | 349   | 252 | 289  | 28 | 282  | 3  | 102.6 | 282        | 3  |
| 91SI-4-90  | 72  | 0.50 | 0.0481 | 0.0085 | 0.3045 | 0.0545 | 0.0459 | 0.0014 | 106   | 421 | 270  | 43 | 289  | 8  | 93.3  | 289        | 8  |
| 91SI-4-91  | 152 | 0.50 | 0.0554 | 0.0053 | 0.3553 | 0.0338 | 0.0465 | 0.0006 | 427   | 211 | 309  | 25 | 293  | 3  | 105.3 | 293        | 3  |
| 91SI-4-92  | 85  | 0.42 | 0.0436 | 0.0115 | 0.2708 | 0.0720 | 0.0451 | 0.0014 | (136) | 664 | 243  | 58 | 284  | 9  | 85.6  | Discordant |    |
| 91SI-4-93  | 535 | 0.38 | 0.0644 | 0.0009 | 1.168  | 0.0350 | 0.1315 | 0.0034 | 756   | 30  | 786  | 16 | 796  | 20 | 98.7  | 796        | 20 |
| 91SI-4-94  | 532 | 1.11 | 0.0517 | 0.0017 | 0.3252 | 0.0130 | 0.0456 | 0.0010 | 272   | 75  | 286  | 10 | 288  | 6  | 99.4  | 288        | 6  |
| 91SI-4-95  | 132 | 0.50 | 0.0472 | 0.0080 | 0.3107 | 0.0541 | 0.0477 | 0.0019 | 59    | 407 | 275  | 42 | 301  | 12 | 91.4  | 301        | 12 |
| 91SI-4-96  | 242 | 0.50 | 0.0792 | 0.0011 | 2.216  | 0.0377 | 0.2028 | 0.0020 | 1178  | 27  | 1186 | 12 | 1190 | 11 | 99.0  | 1178       | 27 |
| 91SI-4-97  | 160 | 0.37 | 0.1210 | 0.0006 | 6.052  | 0.0968 | 0.3627 | 0.0054 | 1971  | 10  | 1983 | 14 | 1995 | 25 | 98.8  | 1971       | 10 |
| 91SI-4-98  | 307 | 0.67 | 0.1362 | 0.0011 | 7.359  | 0.0957 | 0.3917 | 0.0043 | 2180  | 14  | 2156 | 12 | 2131 | 19 | 102.3 | 2180       | 14 |
| 91SI-4-99  | 72  | 0.50 | 0.0437 | 0.0129 | 0.2863 | 0.0847 | 0.0476 | 0.0004 | (130) | 745 | 256  | 67 | 300  | 2  | 85.3  | Discordant |    |
| 91SI-4-100 | 215 | 0.67 | 0.0549 | 0.0032 | 0.3587 | 0.0237 | 0.0474 | 0.0014 | 406   | 132 | 311  | 18 | 299  | 9  | 104.2 | 299        | 9  |

Sample LT11A, quartz arenite, Late Carboniferous Suogedangtau Formation in south of Wushi section of the Kepingtage area of northern Tarim, (Han et al., 2015, Tectonics)

|           |     |     |      |        |        |        |        |        |        |      |    |      |    |      |    |       |      |    |
|-----------|-----|-----|------|--------|--------|--------|--------|--------|--------|------|----|------|----|------|----|-------|------|----|
| LT11A-001 | 145 | 323 | 0.45 | 0.0706 | 0.0013 | 1.617  | 0.0310 | 0.1661 | 0.0021 | 944  | 36 | 977  | 12 | 990  | 12 | 98.7  | 990  | 12 |
| LT11A-002 | 135 | 498 | 0.27 | 0.0703 | 0.0012 | 1.554  | 0.0280 | 0.1602 | 0.0020 | 937  | 34 | 952  | 11 | 958  | 11 | 99.4  | 958  | 11 |
| LT11A-003 | 123 | 165 | 0.75 | 0.0652 | 0.0015 | 1.268  | 0.0300 | 0.1409 | 0.0019 | 781  | 46 | 832  | 13 | 850  | 11 | 97.9  | 850  | 11 |
| LT11A-004 | 91  | 134 | 0.68 | 0.1703 | 0.0028 | 11.341 | 0.1990 | 0.4825 | 0.0062 | 2561 | 26 | 2552 | 16 | 2538 | 27 | 100.9 | 2561 | 26 |
| LT11A-005 | 24  | 44  | 0.55 | 0.1051 | 0.0025 | 4.499  | 0.1100 | 0.3103 | 0.0044 | 1715 | 42 | 1731 | 20 | 1742 | 22 | 98.5  | 1715 | 42 |
| LT11A-006 | 392 | 429 | 0.91 | 0.1885 | 0.0029 | 14.371 | 0.2380 | 0.5524 | 0.0069 | 2729 | 24 | 2775 | 16 | 2835 | 29 | 96.3  | 2729 | 24 |
| LT11A-007 | 97  | 106 | 0.91 | 0.1442 | 0.0025 | 8.948  | 0.1620 | 0.4499 | 0.0058 | 2278 | 28 | 2333 | 17 | 2395 | 26 | 95.1  | 2278 | 28 |
| LT11A-008 | 295 | 359 | 0.82 | 0.1178 | 0.0019 | 5.377  | 0.0930 | 0.3308 | 0.0042 | 1923 | 28 | 1881 | 15 | 1842 | 20 | 104.4 | 1923 | 28 |
| LT11A-009 | 27  | 25  | 1.09 | 0.1153 | 0.0032 | 5.190  | 0.1440 | 0.3264 | 0.0050 | 1884 | 48 | 1851 | 24 | 1821 | 24 | 103.5 | 1884 | 48 |
| LT11A-010 | 54  | 124 | 0.43 | 0.1886 | 0.0031 | 14.504 | 0.2550 | 0.5575 | 0.0072 | 2730 | 26 | 2783 | 17 | 2856 | 30 | 95.6  | 2730 | 26 |
| LT11A-011 | 49  | 87  | 0.57 | 0.1125 | 0.0022 | 5.164  | 0.1060 | 0.3327 | 0.0044 | 1840 | 34 | 1847 | 17 | 1851 | 21 | 99.4  | 1840 | 34 |
| LT11A-012 | 78  | 43  | 1.83 | 0.0756 | 0.0025 | 1.881  | 0.0610 | 0.1803 | 0.0027 | 1085 | 63 | 1075 | 22 | 1069 | 15 | 101.5 | 1085 | 63 |
| LT11A-013 | 149 | 116 | 1.29 | 0.0535 | 0.0020 | 0.5220 | 0.0190 | 0.0708 | 0.0010 | 349  | 79 | 427  | 13 | 441  | 6  | 96.8  | 441  | 6  |
| LT11A-014 | 150 | 297 | 0.50 | 0.0544 | 0.0014 | 0.5220 | 0.0130 | 0.0695 | 0.0009 | 388  | 54 | 426  | 9  | 433  | 6  | 98.4  | 433  | 6  |
| LT11A-015 | 100 | 636 | 0.16 | 0.0696 | 0.0012 | 1.500  | 0.0270 | 0.1562 | 0.0020 | 917  | 35 | 930  | 11 | 936  | 11 | 99.4  | 936  | 11 |
| LT11A-016 | 73  | 131 | 0.56 | 0.1101 | 0.0020 | 4.898  | 0.0940 | 0.3225 | 0.0042 | 1801 | 33 | 1802 | 16 | 1802 | 20 | 99.9  | 1801 | 33 |
| LT11A-017 | 113 | 271 | 0.42 | 0.1193 | 0.0020 | 5.959  | 0.1060 | 0.3622 | 0.0046 | 1945 | 29 | 1970 | 15 | 1993 | 22 | 97.6  | 1945 | 29 |
| LT11A-018 | 38  | 250 | 0.15 | 0.1179 | 0.0020 | 5.657  | 0.1010 | 0.3480 | 0.0044 | 1924 | 30 | 1925 | 15 | 1925 | 21 | 99.9  | 1924 | 30 |
| LT11A-019 | 176 | 330 | 0.53 | 0.0666 | 0.0013 | 1.348  | 0.0270 | 0.1467 | 0.0019 | 825  | 40 | 867  | 12 | 883  | 11 | 98.2  | 883  | 11 |
| LT11A-020 | 55  | 498 | 0.11 | 0.1102 | 0.0018 | 5.124  | 0.0890 | 0.3371 | 0.0042 | 1802 | 29 | 1840 | 15 | 1873 | 20 | 96.2  | 1802 | 29 |
| LT11A-021 | 156 | 300 | 0.52 | 0.1280 | 0.0021 | 6.673  | 0.1170 | 0.3779 | 0.0048 | 2071 | 29 | 2069 | 16 | 2066 | 22 | 100.2 | 2071 | 29 |
| LT11A-022 | 66  | 33  | 2.02 | 0.1616 | 0.0034 | 11.028 | 0.2390 | 0.4946 | 0.0071 | 2473 | 35 | 2525 | 20 | 2591 | 31 | 95.4  | 2473 | 35 |
| LT11A-023 | 43  | 231 | 0.19 | 0.1214 | 0.0021 | 6.239  | 0.1130 | 0.3727 | 0.0048 | 1976 | 30 | 2010 | 16 | 2042 | 22 | 96.8  | 1976 | 30 |
| LT11A-024 | 11  | 36  | 0.32 | 0.1432 | 0.0032 | 8.383  | 0.1900 | 0.4243 | 0.0061 | 2266 | 37 | 2273 | 21 | 2280 | 28 | 99.4  | 2266 | 37 |
| LT11A-025 | 86  | 421 | 0.20 | 0.1198 | 0.0019 | 5.553  | 0.1000 | 0.3362 | 0.0042 | 1953 | 27 | 1909 | 16 | 1869 | 20 | 104.5 | 1953 | 27 |
| LT11A-026 | 105 | 163 | 0.64 | 0.1626 | 0.0028 | 9.935  | 0.1800 | 0.4430 | 0.0057 | 2482 | 28 | 2429 | 17 | 2364 | 26 | 105.0 | 2482 | 28 |
| LT11A-027 | 182 | 457 | 0.40 | 0.1177 | 0.0020 | 5.732  | 0.1010 | 0.3531 | 0.0045 | 1921 | 29 | 1936 | 15 | 1949 | 21 | 98.6  | 1921 | 29 |
| LT11A-028 | 36  | 49  | 0.73 | 0.1171 | 0.0026 | 5.886  | 0.1330 | 0.3643 | 0.0051 | 1913 | 39 | 1959 | 20 | 2002 | 24 | 95.6  | 1913 | 39 |
| LT11A-029 | 49  | 138 | 0.35 | 0.1173 | 0.0022 | 6.275  | 0.1200 | 0.3880 | 0.0051 | 1915 | 32 | 2015 | 17 | 2113 | 23 | 90.6  | 1915 | 32 |
| LT11A-030 | 136 | 179 | 0.76 | 0.1629 | 0.0028 | 10.123 | 0.1850 | 0.4504 | 0.0058 | 2486 | 29 | 2446 | 17 | 2397 | 26 | 103.7 | 2486 | 29 |
| LT11A-031 | 77  | 82  | 0.94 | 0.1198 | 0.0024 | 5.695  | 0.1190 | 0.3447 | 0.0046 | 1953 | 34 | 1931 | 18 | 1909 | 22 | 102.3 | 1953 | 34 |
| LT11A-032 | 36  | 77  | 0.47 | 0.1178 | 0.0024 | 5.648  | 0.1190 | 0.3477 | 0.0047 | 1922 | 35 | 1923 | 18 | 1924 | 22 | 99.9  | 1922 | 35 |
| LT11A-033 | 130 | 105 | 1.24 | 0.0589 | 0.0020 | 0.6860 | 0.0230 | 0.0844 | 0.0012 | 563  | 71 | 530  | 14 | 523  | 7  | 101.3 | 523  | 7  |
| LT11A-034 | 65  | 187 | 0.35 | 0.1455 | 0.0026 | 8.545  | 0.1580 | 0.4257 | 0.0055 | 2294 | 29 | 2291 | 17 | 2286 | 25 | 100.3 | 2294 | 29 |
| LT11A-035 | 93  | 86  | 1.08 | 0.0629 | 0.0021 | 0.9580 | 0.0310 | 0.1105 | 0.0016 | 704  | 66 | 682  | 16 | 675  | 9  | 101.0 | 675  | 9  |
| LT11A-036 | 61  | 252 | 0.24 | 0.1212 | 0.0022 | 5.920  | 0.1110 | 0.3542 | 0.0046 | 1974 | 30 | 1964 | 16 | 1955 | 22 | 101.0 | 1974 | 30 |
| LT11A-037 | 69  | 261 | 0.26 | 0.0707 | 0.0015 | 1.384  | 0.0300 | 0.1420 | 0.0019 | 948  | 42 | 882  | 13 | 856  | 10 | 103.0 | 856  | 10 |
| LT11A-038 | 72  | 241 | 0.30 | 0.1458 | 0.0026 | 8.772  | 0.1630 | 0.4362 | 0.0056 | 2297 | 29 | 2315 | 17 | 2334 | 25 | 98.4  | 2297 | 29 |
| LT11A-039 | 61  | 173 | 0.35 | 0.1091 | 0.0021 | 4.958  | 0.0980 | 0.3295 | 0.0043 | 1784 | 33 | 1812 | 17 | 1836 | 21 | 97.2  | 1784 | 33 |
| LT11A-040 | 79  | 138 | 0.57 | 0.0675 | 0.0018 | 1.225  | 0.0330 | 0.1316 | 0.0018 | 853  | 53 | 812  | 15 | 797  | 10 | 101.9 | 797  | 10 |
| LT11A-041 | 161 | 225 | 0.71 | 0.1175 | 0.0022 | 5.839  | 0.1120 | 0.3602 | 0.0047 | 1919 | 31 | 1952 | 17 | 1983 | 22 | 96.8  | 1919 | 31 |
| LT11A-042 | 71  | 80  | 0.89 | 0.1665 | 0.0034 | 10.246 | 0.2760 | 0.4463 | 0.0067 | 2523 | 33 | 2457 | 25 | 2379 | 30 | 106.1 | 2523 | 33 |
| LT11A-043 | 244 | 605 | 0.40 | 0.0568 | 0.0012 | 0.5840 | 0.0130 | 0.0745 | 0.0010 | 484  | 45 | 467  | 8  | 463  | 6  | 100.9 | 463  | 6  |
| LT11A-044 | 130 | 121 | 1.08 | 0.0660 | 0.0018 | 1.254  | 0.0340 | 0.1377 | 0.0019 | 808  | 53 | 825  | 15 | 831  | 11 | 99.3  | 831  | 11 |
| LT11A-045 | 4   | 602 | 0.01 | 0.1180 | 0.0021 | 5.584  | 0.1060 | 0.3430 | 0.0044 | 1926 | 31 | 1914 | 16 | 1901 | 21 | 101.3 | 1926 | 31 |
| LT11A-046 | 110 | 202 | 0.55 | 0.1181 | 0.0023 | 5.486  | 0.1090 | 0.3368 | 0.0044 | 1928 | 32 | 1988 | 17 | 1871 | 21 | 103.0 | 1928 | 32 |
| LT11A-047 | 65  | 126 | 0.52 | 0.1193 | 0.0024 | 5.927  | 0.1220 | 0.3601 | 0.0048 | 1946 | 34 | 1965 | 18 | 1983 | 23 | 98.1  | 1946 | 34 |
| LT11A-048 | 62  | 349 | 0.18 | 0.0788 | 0.0018 | 2.266  | 0.0570 | 0.2086 | 0.0027 | 1166 | 42 | 1202 | 18 | 1221 | 15 | 95.5  | 1166 | 42 |
| LT11A-049 | 96  | 139 | 0.69 | 0.0676 | 0.0017 | 1.287  | 0.0340 | 0.1379 | 0.0019 | 858  | 51 | 840  | 15 | 833  | 11 | 100.8 | 833  | 11 |
| LT11A-050 | 70  | 105 | 0.67 | 0.1730 | 0.0034 | 10.830 | 0.2190 | 0.4538 | 0.0061 | 2587 | 31 | 2509 | 19 | 2412 | 27 | 107.3 | 2587 | 31 |
| LT11A-051 | 72  | 255 | 0.28 | 0.0701 | 0.0015 | 1.544  | 0.0350 | 0.1598 | 0.0021 | 930  | 43 | 948  | 14 | 956  | 12 | 99.2  | 956  | 12 |
| LT11A-052 | 94  | 243 | 0.38 | 0.0551 | 0.0015 | 0.5790 | 0.0160 | 0.0762 | 0.0011 | 416  | 59 | 464  | 10 | 473  | 6  | 98.1  | 473  | 6  |
| LT11A-053 | 194 | 389 | 0.50 | 0.0566 | 0.0014 | 0.5880 | 0.0150 | 0.0753 | 0.0010 | 477  | 52 | 469  | 9  | 468  | 6  | 100.2 | 468  | 6  |
| LT11A-054 | 76  | 254 | 0.30 | 0.0656 | 0.0015 | 1.267  | 0.0300 | 0.1401 | 0.0019 | 792  | 46 | 831  | 13 | 845  | 11 | 98.3  | 845  | 11 |
| LT11A-055 | 21  | 49  | 0.43 | 0.0764 | 0.0024 | 2.088  | 0.0650 | 0.1983 | 0.0030 | 1105 | 60 | 1145 | 21 | 1166 | 16 | 94.8  | 1105 | 60 |
| LT11A-056 | 29  | 164 | 0.18 | 0.0717 | 0.0017 | 1.657  | 0.0400 | 0.1676 | 0.0023 | 978  | 47 | 992  | 15 | 999  | 12 | 99.9  | 999  | 12 |
| LT11A-057 | 63  | 69  | 0.92 | 0.0720 | 0.0023 | 1.418  | 0.0450 | 0.1428 | 0.0021 | 986  | 63 | 896  | 19 | 861  | 12 | 104.1 | 861  | 12 |
| LT11A-058 | 51  | 86  | 0.59 | 0.0739 | 0.0022 | 1.803  | 0.0530 | 0.1770 | 0.0026 | 1038 | 58 | 1046 | 19 | 1050 | 14 | 98.9  | 1038 | 58 |
| LT11A-059 | 162 | 182 | 0.89 | 0.1186 | 0.0024 | 6.063  | 0.1280 | 0.3708 | 0.0049 | 1935 | 36 | 1985 | 18 | 2033 | 23 | 95.2  | 1935 | 36 |
| LT11A-060 | 119 | 131 | 0.91 | 0.1184 | 0.0025 | 5.897  | 0.1290 | 0.3612 | 0.0049 | 1932 | 37 | 1961 | 19 | 1988 | 23 | 97.2  | 1932 | 37 |
| LT11A-061 | 59  | 362 | 0.16 | 0.1631 | 0.0032 | 10.825 | 0.2200 | 0.4813 | 0.0063 | 2488 | 32 | 2508 | 19 | 2533 | 27 | 98.2  | 2488 | 32 |
| LT11A-062 | 119 | 227 | 0.52 | 0.0583 | 0.0017 | 0.6060 | 0.0180 | 0.0753 | 0.0011 | 542  | 61 | 481  | 11 | 468  | 6  | 102.8 | 468  | 6  |
| LT11A-063 | 20  | 62  | 0.32 | 0.1784 | 0.0038 | 12.842 | 0.2840 | 0.5219 | 0.0073 | 2638 | 35 | 2688 | 21 | 2707 | 31 | 97.5  | 2638 | 35 |
| LT11A-064 | 99  | 129 | 0.77 | 0.1011 | 0.0023 | 4.097  | 0.0940 | 0.2940 | 0.0040 | 1644 | 41 | 1654 | 19 | 1661 | 20 | 99.0  | 1644 | 41 |
| LT11A-065 | 77  | 170 | 0.45 | 0.1615 | 0.0033 | 10.698 | 0.2270 | 0.4805 | 0.0064 | 2471 | 34 | 2497 | 20 | 2529 | 28 | 97.7  | 2471 | 34 |
| LT11A-066 | 69  | 239 | 0.29 | 0.1529 | 0.0031 | 9.443  | 0.1990 | 0.4480 | 0.0059 | 2378 | 34 | 2382 | 19 | 2386 | 26 | 99.7  | 2378 | 34 |
| LT11A-067 | 77  | 101 | 0.76 | 0.0608 | 0.0023 | 0.6710 | 0.0250 | 0.0800 | 0.0012 | 631  | 78 | 521  | 15 | 496  | 7  | 105.0 | 496  | 7  |
| LT11A-068 | 157 | 123 | 1.27 | 0.1203 | 0.0027 | 5.797  | 0.1310 | 0.3496 | 0.0048 | 1960 | 38 | 1946 | 20 | 1933 | 23 | 101.4 | 1960 | 38 |
| LT11A-069 | 116 | 326 | 0.36 | 0.0710 | 0.0016 | 1.623  | 0.0380 | 0.1659 | 0.0022 | 956  | 45 | 979  | 15 | 990  | 12 | 98.9  | 990  | 12 |
| LT11A-070 | 216 | 267 | 0.81 | 0.0580 | 0.0017 | 0.5510 | 0.0160 | 0.06   |        |      |    |      |    |      |    |       |      |    |

|           |     |     |      |        |        |        |        |        |        |      |    |      |    |      |    |       |      |    |
|-----------|-----|-----|------|--------|--------|--------|--------|--------|--------|------|----|------|----|------|----|-------|------|----|
| LT11A-091 | 76  | 165 | 0.46 | 0.0569 | 0.0019 | 0.5760 | 0.0200 | 0.0735 | 0.0011 | 486  | 73 | 462  | 13 | 457  | 7  | 101.1 | 457  | 7  |
| LT11A-092 | 124 | 221 | 0.56 | 0.0554 | 0.0018 | 0.5680 | 0.0180 | 0.0745 | 0.0011 | 426  | 69 | 457  | 12 | 463  | 7  | 98.7  | 463  | 7  |
| LT11A-093 | 62  | 116 | 0.53 | 0.1677 | 0.0041 | 11.448 | 0.2860 | 0.4954 | 0.0070 | 2534 | 40 | 2560 | 23 | 2594 | 30 | 97.7  | 2534 | 40 |
| LT11A-094 | 143 | 358 | 0.40 | 0.0715 | 0.0018 | 1.626  | 0.0420 | 0.1650 | 0.0023 | 972  | 50 | 980  | 16 | 984  | 13 | 99.6  | 984  | 13 |
| LT11A-095 | 85  | 182 | 0.47 | 0.0580 | 0.0020 | 0.5970 | 0.0200 | 0.0747 | 0.0011 | 531  | 71 | 475  | 13 | 464  | 7  | 102.4 | 464  | 7  |
| LT11A-096 | 130 | 260 | 0.50 | 0.1525 | 0.0037 | 9.368  | 0.2310 | 0.4457 | 0.0062 | 2374 | 40 | 2375 | 23 | 2376 | 28 | 99.9  | 2374 | 40 |
| LT11A-097 | 370 | 643 | 0.58 | 0.0551 | 0.0015 | 0.5740 | 0.0160 | 0.0756 | 0.0011 | 417  | 58 | 461  | 10 | 470  | 6  | 98.1  | 470  | 6  |
| LT11A-098 | 54  | 82  | 0.66 | 0.1345 | 0.0035 | 7.728  | 0.2050 | 0.4169 | 0.0060 | 2157 | 44 | 2200 | 24 | 2246 | 27 | 96.0  | 2157 | 44 |
| LT11A-099 | 100 | 98  | 1.02 | 0.1187 | 0.0031 | 5.724  | 0.1530 | 0.3499 | 0.0051 | 1936 | 45 | 1935 | 23 | 1934 | 24 | 100.1 | 1936 | 45 |
| LT11A-100 | 168 | 229 | 0.73 | 0.0975 | 0.0025 | 3.837  | 0.1000 | 0.2854 | 0.0040 | 1577 | 46 | 1601 | 21 | 1619 | 20 | 97.4  | 1577 | 46 |

| Sample LT12A, quartz arenite, Late Carboniferous Biegentawu Formation in south of Wushi section of the Kepingtage area of northern Tarim, (Han et al., 2015, Tectonics) |     |      |      |        |        |        |        |        |        |      |    |      |    |      |    |       |            |    |
|-------------------------------------------------------------------------------------------------------------------------------------------------------------------------|-----|------|------|--------|--------|--------|--------|--------|--------|------|----|------|----|------|----|-------|------------|----|
| LT12A-001                                                                                                                                                               | 94  | 261  | 0.36 | 0.0769 | 0.0015 | 2.054  | 0.0420 | 0.1936 | 0.0025 | 1118 | 38 | 1134 | 14 | 1141 | 14 | 98.0  | 1118       | 38 |
| LT12A-002                                                                                                                                                               | 248 | 206  | 1.20 | 0.0977 | 0.0019 | 3.844  | 0.0760 | 0.2850 | 0.0037 | 1581 | 35 | 1602 | 16 | 1616 | 19 | 97.8  | 1581       | 35 |
| LT12A-003                                                                                                                                                               | 497 | 765  | 0.65 | 0.1005 | 0.0017 | 4.011  | 0.0730 | 0.2893 | 0.0037 | 1632 | 31 | 1636 | 15 | 1638 | 18 | 99.6  | 1632       | 31 |
| LT12A-004                                                                                                                                                               | 60  | 133  | 0.45 | 0.0818 | 0.0018 | 2.312  | 0.0520 | 0.2047 | 0.0028 | 1241 | 42 | 1216 | 16 | 1201 | 15 | 103.3 | 1241       | 42 |
| LT12A-005                                                                                                                                                               | 48  | 77   | 0.62 | 0.1267 | 0.0025 | 6.902  | 0.1430 | 0.3947 | 0.0053 | 2053 | 34 | 2099 | 18 | 2144 | 25 | 95.8  | 2053       | 34 |
| LT12A-006                                                                                                                                                               | 179 | 340  | 0.53 | 0.0575 | 0.0014 | 0.5890 | 0.0150 | 0.0742 | 0.0010 | 509  | 52 | 470  | 9  | 462  | 6  | 101.7 | 462        | 6  |
| LT12A-007                                                                                                                                                               | 123 | 396  | 0.31 | 0.0631 | 0.0013 | 1.023  | 0.0220 | 0.1174 | 0.0015 | 713  | 43 | 715  | 11 | 715  | 9  | 100.0 | 715        | 9  |
| LT12A-008                                                                                                                                                               | 179 | 256  | 0.70 | 0.0666 | 0.0015 | 1.232  | 0.0280 | 0.1339 | 0.0018 | 826  | 45 | 815  | 13 | 810  | 10 | 100.6 | 810        | 10 |
| LT12A-009                                                                                                                                                               | 167 | 156  | 1.07 | 0.0717 | 0.0016 | 1.640  | 0.0380 | 0.1658 | 0.0022 | 977  | 45 | 986  | 15 | 989  | 12 | 99.7  | 989        | 12 |
| LT12A-010                                                                                                                                                               | 117 | 163  | 0.72 | 0.0647 | 0.0016 | 1.199  | 0.0300 | 0.1343 | 0.0018 | 764  | 51 | 800  | 14 | 812  | 10 | 98.5  | 812        | 10 |
| LT12A-011                                                                                                                                                               | 81  | 297  | 0.27 | 0.0705 | 0.0014 | 1.641  | 0.0350 | 0.1687 | 0.0022 | 944  | 41 | 986  | 13 | 1005 | 12 | 93.9  | 944        | 41 |
| LT12A-012                                                                                                                                                               | 75  | 328  | 0.23 | 0.1169 | 0.0021 | 5.888  | 0.1100 | 0.3651 | 0.0047 | 1909 | 31 | 1959 | 16 | 2006 | 22 | 95.2  | 1909       | 31 |
| LT12A-013                                                                                                                                                               | 215 | 392  | 0.55 | 0.0708 | 0.0014 | 1.408  | 0.0290 | 0.1440 | 0.0019 | 953  | 40 | 892  | 12 | 867  | 11 | 102.9 | 867        | 11 |
| LT12A-014                                                                                                                                                               | 270 | 256  | 1.06 | 0.1154 | 0.0021 | 5.528  | 0.1050 | 0.3472 | 0.0045 | 1886 | 32 | 1905 | 16 | 1921 | 21 | 98.2  | 1886       | 32 |
| LT12A-015                                                                                                                                                               | 78  | 64   | 1.22 | 0.0764 | 0.0022 | 2.068  | 0.0590 | 0.1961 | 0.0028 | 1106 | 55 | 1138 | 19 | 1154 | 15 | 95.8  | 1106       | 55 |
| LT12A-016                                                                                                                                                               | 161 | 324  | 0.50 | 0.0577 | 0.0015 | 0.6210 | 0.0160 | 0.0780 | 0.0011 | 517  | 54 | 490  | 10 | 484  | 6  | 101.2 | 484        | 6  |
| LT12A-017                                                                                                                                                               | 96  | 145  | 0.66 | 0.0983 | 0.0020 | 3.733  | 0.0780 | 0.2753 | 0.0037 | 1592 | 37 | 1578 | 17 | 1567 | 18 | 101.6 | 1592       | 37 |
| LT12A-018                                                                                                                                                               | 171 | 149  | 1.14 | 0.0576 | 0.0018 | 0.5760 | 0.0180 | 0.0724 | 0.0010 | 515  | 69 | 462  | 12 | 451  | 6  | 102.4 | 451        | 6  |
| LT12A-019                                                                                                                                                               | 201 | 337  | 0.60 | 0.0573 | 0.0014 | 0.5590 | 0.0140 | 0.0707 | 0.0010 | 503  | 53 | 451  | 9  | 440  | 6  | 102.5 | 440        | 6  |
| LT12A-020                                                                                                                                                               | 171 | 168  | 1.02 | 0.1662 | 0.0030 | 10.799 | 0.2050 | 0.4707 | 0.0061 | 2520 | 30 | 2506 | 18 | 2487 | 27 | 101.3 | 2520       | 30 |
| LT12A-021                                                                                                                                                               | 44  | 255  | 0.17 | 0.1065 | 0.0020 | 4.618  | 0.0900 | 0.3144 | 0.0041 | 1739 | 33 | 1753 | 16 | 1762 | 20 | 98.7  | 1739       | 33 |
| LT12A-022                                                                                                                                                               | 153 | 229  | 0.67 | 0.1177 | 0.0022 | 5.752  | 0.1120 | 0.3542 | 0.0046 | 1921 | 33 | 1939 | 17 | 1955 | 22 | 98.3  | 1921       | 33 |
| LT12A-023                                                                                                                                                               | 113 | 284  | 0.40 | 0.1065 | 0.0020 | 4.567  | 0.0890 | 0.3109 | 0.0040 | 1740 | 33 | 1743 | 16 | 1745 | 20 | 99.7  | 1740       | 33 |
| LT12A-024                                                                                                                                                               | 68  | 187  | 0.37 | 0.1208 | 0.0023 | 6.301  | 0.1240 | 0.3778 | 0.0050 | 1969 | 33 | 2019 | 17 | 2066 | 23 | 95.3  | 1969       | 33 |
| LT12A-025                                                                                                                                                               | 49  | 422  | 0.12 | 0.1097 | 0.0020 | 3.186  | 0.0640 | 0.2107 | 0.0027 | 1794 | 32 | 1454 | 16 | 1233 | 14 | 145.5 | Discordant |    |
| LT12A-026                                                                                                                                                               | 166 | 337  | 0.49 | 0.0589 | 0.0014 | 0.6570 | 0.0160 | 0.0809 | 0.0011 | 562  | 51 | 513  | 10 | 502  | 7  | 102.2 | 502        | 7  |
| LT12A-027                                                                                                                                                               | 149 | 126  | 1.18 | 0.1625 | 0.0031 | 10.904 | 0.2150 | 0.4864 | 0.0064 | 2481 | 30 | 2515 | 18 | 2555 | 28 | 97.1  | 2481       | 30 |
| LT12A-028                                                                                                                                                               | 131 | 46   | 2.88 | 0.1298 | 0.0031 | 6.737  | 0.1630 | 0.3760 | 0.0055 | 2096 | 40 | 2077 | 21 | 2058 | 26 | 101.8 | 2096       | 40 |
| LT12A-029                                                                                                                                                               | 184 | 194  | 0.95 | 0.0798 | 0.0017 | 2.282  | 0.0500 | 0.2072 | 0.0028 | 1193 | 40 | 1207 | 16 | 1214 | 15 | 98.3  | 1193       | 40 |
| LT12A-030                                                                                                                                                               | 170 | 324  | 0.52 | 0.0752 | 0.0016 | 1.884  | 0.0400 | 0.1814 | 0.0024 | 1075 | 39 | 1075 | 14 | 1075 | 13 | 100.0 | 1075       | 39 |
| LT12A-031                                                                                                                                                               | 20  | 75   | 0.27 | 0.0575 | 0.0024 | 0.6080 | 0.0250 | 0.0767 | 0.0012 | 510  | 87 | 483  | 16 | 476  | 7  | 101.5 | 476        | 7  |
| LT12A-032                                                                                                                                                               | 123 | 171  | 0.72 | 0.0710 | 0.0017 | 1.529  | 0.0370 | 0.1560 | 0.0021 | 958  | 46 | 942  | 15 | 935  | 12 | 100.7 | 935        | 12 |
| LT12A-033                                                                                                                                                               | 68  | 120  | 0.57 | 0.0675 | 0.0018 | 1.328  | 0.0360 | 0.1425 | 0.0020 | 854  | 53 | 858  | 16 | 859  | 11 | 99.9  | 859        | 11 |
| LT12A-034                                                                                                                                                               | 132 | 120  | 1.10 | 0.1233 | 0.0025 | 6.236  | 0.1310 | 0.3665 | 0.0049 | 2005 | 34 | 2009 | 18 | 2013 | 23 | 99.6  | 2005       | 34 |
| LT12A-035                                                                                                                                                               | 151 | 404  | 0.37 | 0.0689 | 0.0014 | 1.504  | 0.0320 | 0.1583 | 0.0021 | 894  | 41 | 932  | 13 | 947  | 12 | 98.4  | 947        | 12 |
| LT12A-036                                                                                                                                                               | 117 | 359  | 0.33 | 0.1769 | 0.0033 | 12.112 | 0.2370 | 0.4961 | 0.0065 | 2624 | 29 | 2613 | 18 | 2597 | 28 | 101.0 | 2624       | 29 |
| LT12A-037                                                                                                                                                               | 136 | 188  | 0.72 | 0.1654 | 0.0032 | 10.624 | 0.2150 | 0.4655 | 0.0062 | 2512 | 31 | 2491 | 19 | 2464 | 27 | 101.9 | 2512       | 31 |
| LT12A-038                                                                                                                                                               | 81  | 261  | 0.31 | 0.0714 | 0.0016 | 1.599  | 0.0360 | 0.1624 | 0.0022 | 967  | 43 | 970  | 14 | 970  | 12 | 100.0 | 970        | 12 |
| LT12A-039                                                                                                                                                               | 80  | 170  | 0.47 | 0.0662 | 0.0016 | 1.307  | 0.0330 | 0.1432 | 0.0020 | 811  | 49 | 849  | 14 | 863  | 11 | 98.4  | 863        | 11 |
| LT12A-040                                                                                                                                                               | 98  | 195  | 0.50 | 0.0578 | 0.0019 | 0.5770 | 0.0190 | 0.0724 | 0.0011 | 521  | 69 | 463  | 12 | 451  | 6  | 102.7 | 451        | 6  |
| LT12A-041                                                                                                                                                               | 318 | 417  | 0.76 | 0.0656 | 0.0014 | 1.264  | 0.0280 | 0.1397 | 0.0019 | 792  | 43 | 830  | 13 | 843  | 10 | 98.5  | 843        | 10 |
| LT12A-042                                                                                                                                                               | 154 | 275  | 0.56 | 0.0659 | 0.0015 | 1.297  | 0.0310 | 0.1427 | 0.0019 | 803  | 46 | 844  | 14 | 860  | 11 | 98.1  | 860        | 11 |
| LT12A-043                                                                                                                                                               | 165 | 356  | 0.46 | 0.0731 | 0.0016 | 1.744  | 0.0390 | 0.1730 | 0.0023 | 1016 | 42 | 1025 | 14 | 1029 | 13 | 98.7  | 1016       | 42 |
| LT12A-044                                                                                                                                                               | 71  | 105  | 0.68 | 0.1710 | 0.0035 | 12.162 | 0.2580 | 0.5154 | 0.0070 | 2568 | 32 | 2617 | 20 | 2680 | 30 | 95.8  | 2568       | 32 |
| LT12A-045                                                                                                                                                               | 164 | 399  | 0.41 | 0.0668 | 0.0015 | 1.296  | 0.0290 | 0.1406 | 0.0019 | 832  | 44 | 844  | 13 | 848  | 11 | 99.5  | 848        | 11 |
| LT12A-046                                                                                                                                                               | 81  | 289  | 0.28 | 0.1443 | 0.0029 | 8.883  | 0.1830 | 0.4462 | 0.0059 | 2280 | 32 | 2326 | 19 | 2378 | 26 | 95.9  | 2280       | 32 |
| LT12A-047                                                                                                                                                               | 25  | 64   | 0.39 | 0.1121 | 0.0027 | 5.288  | 0.1290 | 0.3419 | 0.0048 | 1834 | 42 | 1867 | 21 | 1896 | 23 | 96.7  | 1834       | 42 |
| LT12A-048                                                                                                                                                               | 134 | 259  | 0.52 | 0.0558 | 0.0015 | 0.6460 | 0.0180 | 0.0839 | 0.0012 | 444  | 60 | 506  | 11 | 519  | 7  | 97.5  | 519        | 7  |
| LT12A-049                                                                                                                                                               | 291 | 414  | 0.70 | 0.0777 | 0.0017 | 2.187  | 0.0480 | 0.2040 | 0.0027 | 1140 | 42 | 1177 | 15 | 1197 | 15 | 95.2  | 1140       | 42 |
| LT12A-050                                                                                                                                                               | 301 | 275  | 1.09 | 0.0671 | 0.0016 | 1.318  | 0.0320 | 0.1425 | 0.0019 | 840  | 48 | 854  | 14 | 859  | 11 | 99.4  | 859        | 11 |
| LT12A-051                                                                                                                                                               | 55  | 89   | 0.62 | 0.0550 | 0.0023 | 0.5800 | 0.0240 | 0.0765 | 0.0012 | 412  | 90 | 465  | 15 | 475  | 7  | 97.9  | 475        | 7  |
| LT12A-052                                                                                                                                                               | 38  | 77   | 0.49 | 0.1005 | 0.0025 | 4.054  | 0.1010 | 0.2923 | 0.0041 | 1634 | 45 | 1645 | 20 | 1653 | 21 | 98.9  | 1634       | 45 |
| LT12A-053                                                                                                                                                               | 18  | 31   | 0.59 | 0.1242 | 0.0034 | 6.412  | 0.1760 | 0.3742 | 0.0057 | 2018 | 47 | 2034 | 24 | 2049 | 27 | 98.5  | 2018       | 47 |
| LT12A-054                                                                                                                                                               | 43  | 61   | 0.70 | 0.0683 | 0.0024 | 1.309  | 0.0450 | 0.1389 | 0.0021 | 878  | 70 | 850  | 20 | 838  | 12 | 101.4 | 838        | 12 |
| LT12A-055                                                                                                                                                               | 63  | 108  | 0.59 | 0.1957 | 0.0042 | 14.987 | 0.3280 | 0.5552 | 0.0076 | 2791 | 34 | 2814 | 21 | 2847 | 31 | 98.0  | 2791       | 34 |
| LT12A-056                                                                                                                                                               | 124 | 251  | 0.49 | 0.0916 | 0.0020 | 3.237  | 0.0730 | 0.2562 | 0.0035 | 1459 | 41 | 1466 | 18 | 1470 | 18 | 99.3  | 1459       | 41 |
| LT12A-057                                                                                                                                                               | 71  | 254  | 0.28 | 0.0781 | 0.0018 | 2.202  | 0.0520 | 0.2046 | 0.0028 | 1148 | 45 | 1182 | 16 | 1200 | 15 | 95.7  | 1148       | 45 |
| LT12A-058                                                                                                                                                               | 63  | 100  | 0.62 | 0.0923 | 0.0023 | 3.434  | 0.0870 | 0.2698 | 0.0038 | 1473 | 46 | 1512 | 20 | 1540 | 19 | 95.6  | 1473       | 46 |
| LT12A-059                                                                                                                                                               | 132 | 324  | 0.41 | 0.0719 | 0.0017 | 1.752  | 0.0420 | 0.1767 | 0.0024 | 983  | 46 | 1028 | 15 | 1049 | 13 | 93.7  | 983        | 46 |
| LT12A-060                                                                                                                                                               | 140 | 362  | 0.39 | 0.0558 | 0.0015 | 0.5800 | 0.0160 | 0.0753 | 0.0010 | 446  | 59 | 464  | 10 | 468  | 6  | 99.1  | 468        | 6  |
| LT12A-061                                                                                                                                                               | 106 | 219  | 0.49 | 0.0940 | 0.0022 | 2.859  | 0.0680 | 0.2204 | 0.0030 | 1509 | 43 | 1371 | 18 | 1284 | 16 | 117.5 | Discordant |    |
| LT12A-062                                                                                                                                                               | 178 | 165  | 1.08 | 0.1608 | 0.0035 | 10.532 | 0.2370 | 0.4748 | 0.0065 | 2468 | 36 | 2483 | 21 | 2505 | 28 | 98.4  | 2464       | 36 |
| LT12A-063                                                                                                                                                               | 182 | 2720 | 0.07 | 0.0728 | 0.0021 | 0.8070 | 0.0250 | 0.0805 | 0.0011 | 1068 | 57 | 601  | 14 | 499  | 6  | 120.4 | Discordant |    |
| LT12A-064                                                                                                                                                               | 76  | 176  | 0.43 | 0.0736 | 0.0019 | 1.943  | 0.0500 | 0.1916 | 0.0027 | 1029 | 50 | 1096 | 17 | 1130 | 14 | 91.1  | 1029       | 50 |
| LT12A-065                                                                                                                                                               | 192 | 171  | 1.13 | 0.1607 | 0.0036 | 10.625 | 0.2440 | 0.4794 | 0.0066 | 2463 | 37 | 2491 | 21 | 2525 | 29 | 97.5  | 2463       | 37 |
| LT12A-066                                                                                                                                                               | 273 | 148  | 1.85 | 0.1126 | 0.0027 | 5.129  | 0.1230 | 0.3302 | 0.0046 | 1842 | 42 | 1841 | 20 | 1839 | 22 | 100.2 | 1842       | 42 |
| LT12A-067                                                                                                                                                               | 142 | 344  | 0.41 | 0.1753 | 0.0039 | 12.142 | 0.2760 | 0.5022 | 0.0068 | 2609 | 36 | 2615 | 21 | 2623 | 29 | 95.5  | 2609       | 36 |
| LT12A-068                                                                                                                                                               | 19  | 52   | 0.37 | 0.1247 | 0.0032 | 6.621  | 0.1750 | 0.3850 | 0.0057 | 2024 | 45 | 2    |    |      |    |       |            |    |

|           |     |      |      |        |        |        |        |        |        |      |    |      |    |      |    |       |            |    |
|-----------|-----|------|------|--------|--------|--------|--------|--------|--------|------|----|------|----|------|----|-------|------------|----|
| LT13A-005 | 121 | 119  | 1.02 | 0.0653 | 0.0017 | 1.172  | 0.0310 | 0.1302 | 0.0018 | 784  | 54 | 788  | 14 | 789  | 10 | 99.9  | 789        | 10 |
| LT13A-006 | 318 | 250  | 1.27 | 0.0765 | 0.0015 | 2.133  | 0.0420 | 0.2023 | 0.0026 | 1107 | 38 | 1160 | 13 | 1188 | 14 | 93.2  | 1107       | 38 |
| LT13A-007 | 141 | 181  | 0.78 | 0.0533 | 0.0016 | 0.5110 | 0.0150 | 0.0695 | 0.0010 | 342  | 67 | 419  | 10 | 433  | 6  | 96.8  | 433        | 6  |
| LT13A-008 | 125 | 502  | 0.25 | 0.0682 | 0.0012 | 1.463  | 0.0270 | 0.1557 | 0.0020 | 873  | 37 | 915  | 11 | 933  | 11 | 98.1  | 933        | 11 |
| LT13A-009 | 104 | 359  | 0.29 | 0.0676 | 0.0013 | 1.345  | 0.0270 | 0.1444 | 0.0018 | 856  | 40 | 866  | 12 | 869  | 10 | 97.7  | 869        | 10 |
| LT13A-010 | 63  | 58   | 1.10 | 0.1054 | 0.0023 | 4.566  | 0.1020 | 0.3142 | 0.0043 | 1721 | 40 | 1743 | 19 | 1761 | 21 | 97.7  | 1721       | 40 |
| LT13A-011 | 238 | 248  | 0.96 | 0.1600 | 0.0027 | 9.848  | 0.1720 | 0.4465 | 0.0056 | 2455 | 28 | 2421 | 16 | 2380 | 25 | 103.2 | 2455       | 28 |
| LT13A-012 | 68  | 167  | 0.41 | 0.1357 | 0.0025 | 6.939  | 0.1310 | 0.3709 | 0.0048 | 2173 | 32 | 2104 | 17 | 2033 | 23 | 106.9 | 2173       | 32 |
| LT13A-013 | 71  | 43   | 1.66 | 0.0675 | 0.0032 | 0.8700 | 0.0400 | 0.0934 | 0.0016 | 854  | 98 | 635  | 22 | 576  | 10 | 110.2 | Discordant |    |
| LT13A-014 | 338 | 547  | 0.62 | 0.0537 | 0.0012 | 0.5210 | 0.0110 | 0.0705 | 0.0009 | 357  | 48 | 426  | 8  | 439  | 5  | 97.0  | 439        | 5  |
| LT13A-015 | 423 | 793  | 0.53 | 0.1532 | 0.0025 | 7.226  | 0.1240 | 0.3420 | 0.0043 | 2382 | 28 | 2140 | 15 | 1896 | 21 | 125.6 | Discordant |    |
| LT13A-016 | 156 | 139  | 1.13 | 0.0687 | 0.0017 | 1.306  | 0.0320 | 0.1380 | 0.0019 | 888  | 50 | 848  | 14 | 834  | 11 | 101.7 | 834        | 11 |
| LT13A-017 | 190 | 213  | 0.89 | 0.1592 | 0.0028 | 9.909  | 0.1780 | 0.4515 | 0.0058 | 2447 | 29 | 2426 | 17 | 2402 | 26 | 101.9 | 2447       | 29 |
| LT13A-018 | 8   | 41   | 0.19 | 0.1563 | 0.0032 | 9.186  | 0.2030 | 0.4264 | 0.0060 | 2415 | 34 | 2357 | 20 | 2289 | 27 | 105.5 | 2415       | 34 |
| LT13A-019 | 45  | 119  | 0.38 | 0.1595 | 0.0029 | 10.309 | 0.1910 | 0.4687 | 0.0061 | 2451 | 30 | 2463 | 17 | 2478 | 27 | 98.9  | 2451       | 30 |
| LT13A-020 | 77  | 68   | 1.14 | 0.0722 | 0.0021 | 1.726  | 0.0490 | 0.1735 | 0.0025 | 991  | 57 | 1018 | 18 | 1031 | 14 | 96.1  | 991        | 57 |
| LT13A-021 | 177 | 415  | 0.43 | 0.0725 | 0.0014 | 1.466  | 0.0290 | 0.1466 | 0.0019 | 1001 | 38 | 916  | 12 | 882  | 11 | 103.9 | 882        | 11 |
| LT13A-022 | 69  | 183  | 0.38 | 0.1676 | 0.0029 | 11.846 | 0.2140 | 0.5129 | 0.0066 | 2533 | 29 | 2592 | 17 | 2669 | 28 | 94.9  | 2533       | 29 |
| LT13A-023 | 79  | 75   | 1.05 | 0.1163 | 0.0024 | 5.532  | 0.1160 | 0.3450 | 0.0046 | 1901 | 37 | 1906 | 18 | 1911 | 22 | 99.5  | 1901       | 37 |
| LT13A-024 | 23  | 74   | 0.31 | 0.1477 | 0.0029 | 8.613  | 0.1720 | 0.4231 | 0.0057 | 2319 | 33 | 2298 | 18 | 2275 | 26 | 101.9 | 2319       | 33 |
| LT13A-025 | 82  | 313  | 0.26 | 0.0730 | 0.0015 | 1.643  | 0.0330 | 0.1633 | 0.0021 | 1013 | 40 | 987  | 13 | 975  | 12 | 101.2 | 975        | 12 |
| LT13A-026 | 115 | 127  | 0.90 | 0.0670 | 0.0017 | 1.487  | 0.0370 | 0.1609 | 0.0022 | 839  | 51 | 925  | 15 | 962  | 12 | 96.2  | 962        | 12 |
| LT13A-027 | 340 | 492  | 0.69 | 0.1609 | 0.0028 | 10.954 | 0.1960 | 0.4938 | 0.0062 | 2465 | 29 | 2519 | 17 | 2587 | 27 | 95.3  | 2465       | 29 |
| LT13A-028 | 50  | 86   | 0.58 | 0.0951 | 0.0021 | 3.496  | 0.0790 | 0.2666 | 0.0036 | 1531 | 41 | 1526 | 18 | 1523 | 18 | 100.5 | 1531       | 41 |
| LT13A-029 | 89  | 208  | 0.43 | 0.0549 | 0.0016 | 0.5020 | 0.0150 | 0.0664 | 0.0009 | 409  | 65 | 413  | 10 | 414  | 6  | 99.8  | 414        | 6  |
| LT13A-030 | 54  | 83   | 0.65 | 0.0638 | 0.0020 | 1.114  | 0.0340 | 0.1267 | 0.0018 | 734  | 64 | 760  | 16 | 769  | 10 | 98.8  | 769        | 10 |
| LT13A-031 | 178 | 249  | 0.72 | 0.1196 | 0.0023 | 5.889  | 0.1160 | 0.3574 | 0.0047 | 1950 | 34 | 1960 | 17 | 1970 | 22 | 99.0  | 1950       | 34 |
| LT13A-032 | 120 | 290  | 0.41 | 0.0658 | 0.0014 | 1.254  | 0.0280 | 0.1384 | 0.0018 | 799  | 45 | 825  | 12 | 835  | 10 | 98.8  | 835        | 10 |
| LT13A-033 | 157 | 230  | 0.68 | 0.0542 | 0.0016 | 0.4940 | 0.0140 | 0.0662 | 0.0009 | 378  | 65 | 407  | 10 | 413  | 6  | 98.5  | 413        | 6  |
| LT13A-034 | 137 | 140  | 0.98 | 0.1751 | 0.0033 | 11.985 | 0.2310 | 0.4965 | 0.0065 | 2607 | 31 | 2603 | 18 | 2599 | 28 | 100.3 | 2607       | 31 |
| LT13A-035 | 64  | 59   | 1.09 | 0.0660 | 0.0024 | 1.153  | 0.0410 | 0.1268 | 0.0019 | 806  | 76 | 779  | 20 | 769  | 11 | 101.3 | 769        | 11 |
| LT13A-036 | 333 | 1012 | 0.33 | 0.0996 | 0.0019 | 3.237  | 0.0620 | 0.2358 | 0.0030 | 1617 | 35 | 1466 | 15 | 1365 | 16 | 118.5 | Discordant |    |
| LT13A-037 | 139 | 366  | 0.38 | 0.1334 | 0.0025 | 7.184  | 0.1380 | 0.3907 | 0.0050 | 2143 | 32 | 2135 | 17 | 2126 | 23 | 100.8 | 2143       | 32 |
| LT13A-038 | 185 | 455  | 0.41 | 0.1793 | 0.0033 | 12.803 | 0.2420 | 0.5181 | 0.0066 | 2646 | 30 | 2665 | 18 | 2691 | 28 | 98.3  | 2646       | 30 |
| LT13A-039 | 111 | 93   | 1.20 | 0.0701 | 0.0022 | 1.274  | 0.0400 | 0.1319 | 0.0020 | 930  | 65 | 834  | 18 | 799  | 11 | 104.4 | 799        | 11 |
| LT13A-040 | 31  | 59   | 0.53 | 0.1392 | 0.0030 | 7.729  | 0.1700 | 0.4029 | 0.0056 | 2217 | 37 | 2200 | 20 | 2182 | 26 | 101.6 | 2217       | 37 |
| LT13A-041 | 50  | 80   | 0.63 | 0.1448 | 0.0030 | 8.369  | 0.1770 | 0.4194 | 0.0057 | 2285 | 35 | 2272 | 19 | 2258 | 26 | 101.2 | 2285       | 35 |
| LT13A-042 | 295 | 490  | 0.60 | 0.0684 | 0.0014 | 1.514  | 0.0320 | 0.1606 | 0.0021 | 880  | 42 | 936  | 13 | 960  | 12 | 97.5  | 960        | 12 |
| LT13A-043 | 335 | 493  | 0.68 | 0.0657 | 0.0014 | 1.277  | 0.0270 | 0.1410 | 0.0018 | 797  | 44 | 835  | 12 | 850  | 10 | 98.2  | 850        | 10 |
| LT13A-044 | 102 | 126  | 0.81 | 0.1570 | 0.0032 | 9.823  | 0.2030 | 0.4541 | 0.0061 | 2423 | 34 | 2418 | 19 | 2414 | 27 | 100.4 | 2423       | 34 |
| LT13A-045 | 223 | 405  | 0.55 | 0.0671 | 0.0015 | 1.222  | 0.0270 | 0.1322 | 0.0017 | 840  | 46 | 811  | 12 | 801  | 10 | 101.2 | 801        | 10 |
| LT13A-046 | 31  | 23   | 1.32 | 0.1093 | 0.0034 | 4.751  | 0.1470 | 0.3153 | 0.0051 | 1788 | 57 | 1776 | 26 | 1767 | 25 | 101.2 | 1788       | 57 |
| LT13A-047 | 111 | 206  | 0.54 | 0.0652 | 0.0016 | 1.160  | 0.0290 | 0.1290 | 0.0018 | 782  | 53 | 782  | 14 | 782  | 10 | 100.0 | 782        | 10 |
| LT13A-048 | 94  | 159  | 0.59 | 0.0766 | 0.0018 | 2.057  | 0.0490 | 0.1948 | 0.0026 | 1111 | 47 | 1135 | 16 | 1147 | 14 | 96.9  | 1111       | 47 |
| LT13A-049 | 109 | 159  | 0.69 | 0.0906 | 0.0021 | 2.848  | 0.0660 | 0.2280 | 0.0031 | 1439 | 44 | 1368 | 18 | 1324 | 16 | 108.7 | 1439       | 44 |
| LT13A-050 | 153 | 160  | 0.96 | 0.0633 | 0.0018 | 1.118  | 0.0320 | 0.1281 | 0.0018 | 719  | 61 | 762  | 15 | 777  | 10 | 98.1  | 777        | 10 |
| LT13A-051 | 287 | 530  | 0.54 | 0.0697 | 0.0016 | 1.296  | 0.0300 | 0.1350 | 0.0018 | 919  | 47 | 844  | 13 | 816  | 10 | 103.4 | 816        | 10 |
| LT13A-052 | 83  | 245  | 0.34 | 0.1692 | 0.0034 | 10.625 | 0.2210 | 0.4557 | 0.0060 | 2550 | 34 | 2491 | 19 | 2420 | 27 | 105.4 | 2550       | 34 |
| LT13A-053 | 105 | 262  | 0.40 | 0.1454 | 0.0030 | 7.162  | 0.1510 | 0.3574 | 0.0047 | 2293 | 35 | 2132 | 19 | 1970 | 22 | 116.4 | Discordant |    |
| LT13A-054 | 127 | 221  | 0.57 | 0.1373 | 0.0028 | 7.809  | 0.1650 | 0.4129 | 0.0055 | 2193 | 36 | 2209 | 19 | 2228 | 25 | 98.4  | 2193       | 36 |
| LT13A-055 | 53  | 57   | 0.93 | 0.0665 | 0.0028 | 1.213  | 0.0510 | 0.1324 | 0.0022 | 821  | 90 | 806  | 23 | 801  | 13 | 100.6 | 801        | 13 |
| LT13A-056 | 26  | 39   | 0.66 | 0.1248 | 0.0032 | 6.568  | 0.1700 | 0.3819 | 0.0056 | 2026 | 45 | 2055 | 23 | 2085 | 26 | 97.2  | 2026       | 45 |
| LT13A-057 | 79  | 173  | 0.46 | 0.0564 | 0.0019 | 0.6030 | 0.0200 | 0.0777 | 0.0011 | 467  | 69 | 479  | 13 | 482  | 7  | 99.4  | 482        | 7  |
| LT13A-058 | 111 | 76   | 1.46 | 0.1271 | 0.0030 | 6.090  | 0.1460 | 0.3477 | 0.0049 | 2058 | 39 | 1989 | 21 | 1924 | 23 | 107.0 | 2058       | 39 |
| LT13A-059 | 125 | 97   | 1.30 | 0.0766 | 0.0022 | 1.660  | 0.0480 | 0.1573 | 0.0023 | 1111 | 54 | 993  | 18 | 942  | 13 | 105.4 | 942        | 13 |
| LT13A-060 | 331 | 253  | 1.31 | 0.0909 | 0.0021 | 3.003  | 0.0690 | 0.2398 | 0.0032 | 1444 | 41 | 1408 | 18 | 1386 | 17 | 104.2 | 1444       | 41 |
| LT13A-061 | 99  | 166  | 0.60 | 0.1833 | 0.0039 | 10.123 | 0.2560 | 0.4006 | 0.0058 | 2683 | 33 | 2446 | 23 | 2172 | 27 | 123.5 | Discordant |    |
| LT13A-062 | 145 | 267  | 0.54 | 0.0651 | 0.0020 | 0.6460 | 0.0200 | 0.0720 | 0.0010 | 779  | 60 | 506  | 12 | 448  | 6  | 112.9 | Discordant |    |
| LT13A-063 | 103 | 385  | 0.27 | 0.1195 | 0.0026 | 5.524  | 0.1240 | 0.3356 | 0.0045 | 1948 | 37 | 1904 | 19 | 1865 | 22 | 104.5 | 1948       | 37 |
| LT13A-064 | 243 | 333  | 0.73 | 0.0739 | 0.0018 | 1.762  | 0.0430 | 0.1730 | 0.0024 | 1039 | 46 | 1032 | 16 | 1028 | 13 | 101.1 | 1039       | 46 |
| LT13A-065 | 105 | 455  | 0.23 | 0.0701 | 0.0016 | 1.543  | 0.0370 | 0.1597 | 0.0022 | 931  | 45 | 948  | 15 | 955  | 12 | 99.3  | 955        | 12 |
| LT13A-066 | 44  | 63   | 0.69 | 0.1699 | 0.0040 | 11.461 | 0.2770 | 0.4896 | 0.0070 | 2556 | 38 | 2561 | 23 | 2569 | 30 | 99.5  | 2556       | 38 |
| LT13A-067 | 130 | 148  | 0.88 | 0.1610 | 0.0037 | 9.526  | 0.2250 | 0.4294 | 0.0060 | 2466 | 37 | 2390 | 22 | 2303 | 27 | 107.1 | 2466       | 37 |
| LT13A-068 | 78  | 87   | 0.90 | 0.0724 | 0.0023 | 1.638  | 0.0520 | 0.1641 | 0.0024 | 998  | 61 | 985  | 20 | 979  | 14 | 100.6 | 979        | 14 |
| LT13A-069 | 100 | 262  | 0.38 | 0.0717 | 0.0018 | 1.570  | 0.0400 | 0.1590 | 0.0022 | 976  | 48 | 958  | 16 | 951  | 12 | 100.7 | 951        | 12 |
| LT13A-070 | 32  | 81   | 0.40 | 0.1412 | 0.0035 | 7.804  | 0.1940 | 0.4010 | 0.0057 | 2242 | 40 | 2209 | 22 | 2173 | 26 | 103.2 | 2242       | 40 |
| LT13A-071 | 134 | 284  | 0.47 | 0.0707 | 0.0018 | 1.601  | 0.0410 | 0.1642 | 0.0023 | 950  | 50 | 970  | 16 | 980  | 13 | 99.0  | 980        | 13 |
| LT13A-072 | 27  | 31   | 0.86 | 0.1512 | 0.0045 | 8.079  | 0.2390 | 0.3877 | 0.0062 | 2360 | 49 | 2240 | 27 | 2112 | 29 | 111.7 | Discordant |    |
| LT13A-073 | 113 | 291  | 0.39 | 0.1285 | 0.0031 | 6.700  | 0.1630 | 0.3785 | 0.0052 | 2077 | 41 | 2073 | 21 | 2069 | 24 | 100.4 | 2077       | 41 |
| LT13A-074 |     |      |      |        |        |        |        |        |        |      |    |      |    |      |    |       |            |    |

|           |     |     |      |        |        |        |        |        |        |      |     |      |    |      |    |       |            |    |
|-----------|-----|-----|------|--------|--------|--------|--------|--------|--------|------|-----|------|----|------|----|-------|------------|----|
| LT14A-022 | 60  | 37  | 1.63 | 0.0647 | 0.0032 | 0.8540 | 0.0420 | 0.0957 | 0.0017 | 763  | 102 | 627  | 23 | 589  | 10 | 106.5 | 589        | 10 |
| LT14A-023 | 398 | 507 | 0.78 | 0.0572 | 0.0013 | 0.5710 | 0.0130 | 0.0724 | 0.0010 | 500  | 47  | 459  | 8  | 450  | 6  | 102.0 | 450        | 6  |
| LT14A-024 | 165 | 281 | 0.59 | 0.0907 | 0.0017 | 3.104  | 0.0610 | 0.2482 | 0.0033 | 1440 | 35  | 1434 | 15 | 1429 | 17 | 100.8 | 1440       | 35 |
| LT14A-025 | 50  | 61  | 0.82 | 0.1087 | 0.0024 | 5.183  | 0.1160 | 0.3456 | 0.0048 | 1778 | 39  | 1850 | 19 | 1914 | 23 | 92.9  | 1778       | 39 |
| LT14A-026 | 418 | 525 | 0.80 | 0.0533 | 0.0012 | 0.4900 | 0.0110 | 0.0667 | 0.0009 | 340  | 49  | 405  | 8  | 416  | 5  | 97.4  | 416        | 5  |
| LT14A-027 | 155 | 251 | 0.62 | 0.0648 | 0.0014 | 1.209  | 0.0270 | 0.1354 | 0.0018 | 766  | 45  | 805  | 12 | 818  | 10 | 98.4  | 818        | 10 |
| LT14A-028 | 115 | 112 | 1.02 | 0.0815 | 0.0020 | 2.044  | 0.0500 | 0.1818 | 0.0025 | 1234 | 46  | 1130 | 17 | 1077 | 14 | 114.6 | Discordant |    |
| LT14A-029 | 72  | 98  | 0.73 | 0.1105 | 0.0023 | 5.403  | 0.1170 | 0.3547 | 0.0049 | 1807 | 37  | 1885 | 19 | 1957 | 23 | 92.3  | 1807       | 37 |
| LT14A-030 | 16  | 66  | 0.24 | 0.0732 | 0.0022 | 1.951  | 0.0590 | 0.1933 | 0.0029 | 1018 | 60  | 1099 | 20 | 1139 | 16 | 89.4  | Discordant |    |
| LT14A-031 | 94  | 135 | 0.70 | 0.0774 | 0.0019 | 1.739  | 0.0420 | 0.1628 | 0.0022 | 1133 | 46  | 1023 | 16 | 972  | 12 | 105.2 | 972        | 12 |
| LT14A-032 | 80  | 255 | 0.31 | 0.0691 | 0.0017 | 1.528  | 0.0370 | 0.1603 | 0.0022 | 902  | 48  | 942  | 15 | 958  | 12 | 98.3  | 958        | 12 |
| LT14A-033 | 95  | 113 | 0.84 | 0.0790 | 0.0019 | 2.343  | 0.0560 | 0.2149 | 0.0030 | 1173 | 44  | 1225 | 17 | 1255 | 16 | 93.5  | 1173       | 44 |
| LT14A-034 | 187 | 187 | 1.00 | 0.0620 | 0.0015 | 1.146  | 0.0280 | 0.1341 | 0.0018 | 673  | 49  | 775  | 13 | 811  | 10 | 95.6  | 811        | 10 |
| LT14A-035 | 93  | 158 | 0.58 | 0.0737 | 0.0017 | 1.838  | 0.0430 | 0.1808 | 0.0025 | 1032 | 44  | 1059 | 15 | 1072 | 13 | 96.3  | 1032       | 44 |
| LT14A-036 | 61  | 160 | 0.38 | 0.0709 | 0.0017 | 1.674  | 0.0400 | 0.1713 | 0.0023 | 953  | 46  | 999  | 15 | 1019 | 13 | 93.5  | 953        | 46 |
| LT14A-037 | 150 | 220 | 0.68 | 0.0596 | 0.0017 | 0.5700 | 0.0160 | 0.0693 | 0.0010 | 591  | 59  | 458  | 11 | 432  | 6  | 106.0 | 432        | 6  |
| LT14A-038 | 97  | 167 | 0.58 | 0.1457 | 0.0027 | 8.882  | 0.1730 | 0.4421 | 0.0058 | 2296 | 31  | 2326 | 18 | 2360 | 26 | 97.3  | 2296       | 31 |
| LT14A-039 | 133 | 87  | 1.54 | 0.0689 | 0.0025 | 1.174  | 0.0430 | 0.1236 | 0.0019 | 895  | 73  | 789  | 20 | 751  | 11 | 105.1 | 751        | 11 |
| LT14A-040 | 274 | 530 | 0.52 | 0.1104 | 0.0021 | 5.109  | 0.0990 | 0.3356 | 0.0044 | 1806 | 32  | 1838 | 16 | 1866 | 21 | 96.8  | 1806       | 32 |
| LT14A-041 | 208 | 269 | 0.77 | 0.0656 | 0.0015 | 1.228  | 0.0280 | 0.1357 | 0.0018 | 795  | 45  | 814  | 13 | 820  | 10 | 99.3  | 820        | 10 |
| LT14A-042 | 94  | 156 | 0.60 | 0.1028 | 0.0022 | 4.046  | 0.0880 | 0.2855 | 0.0039 | 1675 | 37  | 1643 | 18 | 1619 | 19 | 103.5 | 1675       | 37 |
| LT14A-043 | 107 | 153 | 0.70 | 0.0600 | 0.0026 | 0.6290 | 0.0330 | 0.0760 | 0.0013 | 604  | 91  | 495  | 20 | 472  | 8  | 104.9 | 472        | 8  |
| LT14A-044 | 54  | 63  | 0.86 | 0.1101 | 0.0026 | 4.890  | 0.1190 | 0.3221 | 0.0046 | 1801 | 42  | 1801 | 20 | 1800 | 22 | 100.1 | 1801       | 42 |
| LT14A-045 | 97  | 102 | 0.95 | 0.0569 | 0.0022 | 0.5980 | 0.0230 | 0.0762 | 0.0012 | 488  | 81  | 476  | 14 | 474  | 7  | 100.4 | 474        | 7  |
| LT14A-046 | 37  | 27  | 1.39 | 0.0592 | 0.0058 | 0.7610 | 0.0860 | 0.0933 | 0.0023 | 575  | 205 | 575  | 49 | 575  | 14 | 100.0 | 575        | 14 |
| LT14A-047 | 208 | 297 | 0.70 | 0.0681 | 0.0016 | 1.362  | 0.0320 | 0.1450 | 0.0020 | 872  | 46  | 873  | 14 | 873  | 11 | 100.0 | 873        | 11 |
| LT14A-048 | 64  | 56  | 1.14 | 0.1396 | 0.0034 | 7.761  | 0.1910 | 0.4031 | 0.0059 | 2223 | 40  | 2204 | 22 | 2183 | 27 | 101.8 | 2223       | 40 |
| LT14A-049 | 121 | 251 | 0.48 | 0.0740 | 0.0017 | 1.439  | 0.0340 | 0.1411 | 0.0019 | 1040 | 45  | 905  | 14 | 851  | 11 | 106.3 | 851        | 11 |
| LT14A-050 | 33  | 104 | 0.31 | 0.1752 | 0.0036 | 12.892 | 0.2690 | 0.5337 | 0.0072 | 2608 | 32  | 2672 | 20 | 2757 | 30 | 94.6  | 2608       | 32 |
| LT14A-051 | 58  | 169 | 0.34 | 0.1852 | 0.0037 | 13.771 | 0.2820 | 0.5391 | 0.0072 | 2700 | 31  | 2734 | 19 | 2780 | 30 | 97.1  | 2700       | 31 |
| LT14A-052 | 48  | 102 | 0.47 | 0.1350 | 0.0029 | 7.426  | 0.1620 | 0.3989 | 0.0054 | 2164 | 36  | 2164 | 20 | 2164 | 25 | 100.0 | 2164       | 36 |
| LT14A-053 | 35  | 63  | 0.56 | 0.0675 | 0.0033 | 0.9770 | 0.0470 | 0.1050 | 0.0019 | 853  | 98  | 692  | 24 | 644  | 11 | 107.5 | 644        | 11 |
| LT14A-054 | 72  | 90  | 0.80 | 0.1634 | 0.0035 | 10.824 | 0.2350 | 0.4803 | 0.0066 | 2491 | 34  | 2508 | 20 | 2529 | 29 | 98.5  | 2491       | 34 |
| LT14A-055 | 125 | 232 | 0.54 | 0.0552 | 0.0017 | 0.5740 | 0.0170 | 0.0753 | 0.0011 | 421  | 65  | 460  | 11 | 468  | 6  | 98.3  | 468        | 6  |
| LT14A-056 | 41  | 52  | 0.79 | 0.0630 | 0.0034 | 0.9030 | 0.0480 | 0.1040 | 0.0019 | 707  | 110 | 653  | 26 | 638  | 11 | 102.4 | 638        | 11 |
| LT14A-057 | 146 | 213 | 0.69 | 0.0712 | 0.0017 | 1.826  | 0.0440 | 0.1861 | 0.0025 | 962  | 47  | 1055 | 16 | 1100 | 14 | 87.5  | Discordant |    |
| LT14A-058 | 153 | 187 | 0.82 | 0.0675 | 0.0018 | 1.240  | 0.0320 | 0.1333 | 0.0018 | 852  | 52  | 819  | 15 | 807  | 10 | 101.5 | 807        | 10 |
| LT14A-059 | 205 | 154 | 1.33 | 0.0653 | 0.0020 | 1.068  | 0.0320 | 0.1187 | 0.0017 | 783  | 61  | 738  | 16 | 723  | 10 | 102.1 | 723        | 10 |
| LT14A-060 | 68  | 142 | 0.48 | 0.1054 | 0.0024 | 4.628  | 0.1070 | 0.3186 | 0.0044 | 1721 | 40  | 1754 | 19 | 1783 | 21 | 96.5  | 1721       | 40 |
| LT14A-061 | 132 | 245 | 0.54 | 0.0686 | 0.0018 | 1.370  | 0.0350 | 0.1448 | 0.0020 | 888  | 51  | 876  | 15 | 872  | 11 | 100.5 | 872        | 11 |
| LT14A-062 | 61  | 256 | 0.24 | 0.0929 | 0.0021 | 2.950  | 0.0770 | 0.2304 | 0.0031 | 1485 | 42  | 1395 | 20 | 1336 | 16 | 111.2 | Discordant |    |
| LT14A-063 | 114 | 163 | 0.70 | 0.0737 | 0.0019 | 1.830  | 0.0470 | 0.1801 | 0.0025 | 1033 | 50  | 1056 | 17 | 1067 | 14 | 96.8  | 1033       | 50 |
| LT14A-064 | 85  | 213 | 0.40 | 0.1293 | 0.0029 | 6.717  | 0.1530 | 0.3768 | 0.0051 | 2088 | 38  | 2075 | 20 | 2061 | 24 | 101.3 | 2088       | 38 |
| LT14A-065 | 71  | 165 | 0.43 | 0.2151 | 0.0047 | 15.944 | 0.3540 | 0.5376 | 0.0073 | 2944 | 34  | 2873 | 21 | 2773 | 30 | 106.2 | 2944       | 34 |
| LT14A-066 | 88  | 93  | 0.95 | 0.1944 | 0.0044 | 13.205 | 0.3030 | 0.4926 | 0.0068 | 2780 | 36  | 2694 | 22 | 2582 | 29 | 107.7 | 2780       | 36 |
| LT14A-067 | 245 | 607 | 0.40 | 0.0779 | 0.0018 | 2.085  | 0.0480 | 0.1941 | 0.0026 | 1144 | 43  | 1144 | 16 | 1143 | 14 | 100.1 | 1144       | 43 |
| LT14A-068 | 96  | 113 | 0.85 | 0.0677 | 0.0023 | 1.296  | 0.0430 | 0.1388 | 0.0021 | 860  | 68  | 844  | 19 | 838  | 12 | 100.7 | 838        | 12 |
| LT14A-069 | 70  | 161 | 0.43 | 0.0679 | 0.0019 | 1.310  | 0.0370 | 0.1400 | 0.0020 | 864  | 56  | 850  | 16 | 844  | 11 | 100.7 | 844        | 11 |
| LT14A-070 | 94  | 255 | 0.37 | 0.1127 | 0.0026 | 5.220  | 0.1210 | 0.3361 | 0.0045 | 1843 | 40  | 1856 | 20 | 1868 | 22 | 98.7  | 1843       | 40 |
| LT14A-071 | 157 | 210 | 0.75 | 0.0573 | 0.0020 | 0.5850 | 0.0200 | 0.0740 | 0.0011 | 505  | 72  | 468  | 13 | 460  | 7  | 101.7 | 460        | 7  |
| LT14A-072 | 112 | 225 | 0.50 | 0.1443 | 0.0034 | 8.793  | 0.2070 | 0.4420 | 0.0060 | 2279 | 39  | 2317 | 21 | 2360 | 27 | 96.6  | 2279       | 39 |
| LT14A-073 | 104 | 209 | 0.50 | 0.1006 | 0.0024 | 4.143  | 0.1010 | 0.2986 | 0.0041 | 1636 | 43  | 1663 | 20 | 1685 | 20 | 97.1  | 1636       | 43 |
| LT14A-074 | 125 | 97  | 1.29 | 0.0691 | 0.0022 | 1.330  | 0.0420 | 0.1397 | 0.0021 | 900  | 63  | 859  | 18 | 843  | 12 | 101.9 | 843        | 12 |
| LT14A-075 | 101 | 203 | 0.50 | 0.0687 | 0.0019 | 1.290  | 0.0360 | 0.1362 | 0.0019 | 890  | 55  | 841  | 16 | 823  | 11 | 102.2 | 823        | 11 |
| LT14A-076 | 83  | 53  | 1.57 | 0.0657 | 0.0027 | 1.145  | 0.0460 | 0.1264 | 0.0020 | 797  | 82  | 775  | 22 | 767  | 12 | 101.0 | 767        | 12 |
| LT14A-077 | 93  | 80  | 1.17 | 0.0668 | 0.0024 | 1.148  | 0.0410 | 0.1247 | 0.0019 | 831  | 73  | 776  | 19 | 758  | 11 | 102.4 | 758        | 11 |
| LT14A-078 | 68  | 137 | 0.50 | 0.1383 | 0.0035 | 7.748  | 0.1980 | 0.4063 | 0.0058 | 2206 | 43  | 2202 | 23 | 2198 | 26 | 100.4 | 2206       | 43 |
| LT14A-079 | 220 | 490 | 0.45 | 0.0838 | 0.0021 | 2.437  | 0.0610 | 0.2109 | 0.0029 | 1289 | 47  | 1253 | 18 | 1233 | 15 | 104.5 | 1289       | 47 |
| LT14A-080 | 95  | 172 | 0.55 | 0.1311 | 0.0034 | 6.990  | 0.1790 | 0.3667 | 0.0055 | 2113 | 43  | 2110 | 23 | 2107 | 25 | 100.3 | 2113       | 43 |
| LT14A-081 | 151 | 187 | 0.81 | 0.0578 | 0.0020 | 0.5920 | 0.0200 | 0.0743 | 0.0011 | 522  | 74  | 472  | 13 | 462  | 7  | 102.2 | 462        | 7  |
| LT14A-082 | 31  | 31  | 1.00 | 0.1093 | 0.0035 | 5.132  | 0.1620 | 0.3407 | 0.0054 | 1787 | 56  | 1841 | 27 | 1890 | 26 | 94.6  | 1787       | 56 |
| LT14A-083 | 65  | 478 | 0.14 | 0.0764 | 0.0019 | 1.969  | 0.0500 | 0.1870 | 0.0026 | 1106 | 50  | 1105 | 17 | 1105 | 14 | 100.1 | 1106       | 50 |
| LT14A-084 | 75  | 241 | 0.31 | 0.0827 | 0.0023 | 2.365  | 0.0640 | 0.2074 | 0.0029 | 1263 | 53  | 1232 | 19 | 1215 | 16 | 104.0 | 1263       | 53 |
| LT14A-085 | 135 | 177 | 0.76 | 0.0707 | 0.0021 | 1.398  | 0.0410 | 0.1436 | 0.0021 | 947  | 60  | 888  | 17 | 865  | 12 | 102.7 | 865        | 12 |
| LT14A-086 | 67  | 337 | 0.20 | 0.1177 | 0.0030 | 5.993  | 0.1510 | 0.3695 | 0.0051 | 1921 | 45  | 1975 | 22 | 2027 | 24 | 94.8  | 1921       | 45 |
| LT14A-087 | 115 | 171 | 0.67 | 0.0926 | 0.0025 | 3.234  | 0.0870 | 0.2533 | 0.0036 | 1480 | 51  | 1465 | 21 | 1456 | 18 | 101.6 | 1480       | 51 |
| LT14A-088 | 59  | 58  | 1.02 | 0.1098 | 0.0032 | 5.160  | 0.1490 | 0.3410 | 0.0051 | 1796 | 52  | 1846 | 25 | 1891 | 24 | 95.0  | 1796       | 52 |
| LT14A-089 | 134 | 331 | 0.40 | 0.1636 | 0.0042 | 10.961 | 0.2780 | 0.4860 | 0.0067 | 2493 | 42  | 2520 | 24 | 2553 | 29 | 97.6  | 2493       | 42 |
| LT14A-090 | 115 | 311 | 0.37 | 0.1267 | 0.0033 | 6.846  | 0.1770 | 0.3921 | 0.0055 | 2052 | 45  | 2092 | 23 | 2133 | 25 | 96.2  | 2052       | 45 |
| LT14A-091 |     |     |      |        |        |        |        |        |        |      |     |      |    |      |    |       |            |    |



|     |     |      |        |        |        |        |        |        |      |    |      |    |      |    |       |            |    |
|-----|-----|------|--------|--------|--------|--------|--------|--------|------|----|------|----|------|----|-------|------------|----|
| 46  | 116 | 0.97 | 0.0567 | 0.0016 | 0.5466 | 0.0157 | 0.0699 | 0.0009 | 479  | 40 | 443  | 10 | 436  | 6  | 101.6 | 436        | 6  |
| 47  | 61  | 1.67 | 0.0651 | 0.0020 | 1.091  | 0.0333 | 0.1215 | 0.0017 | 779  | 41 | 749  | 16 | 739  | 10 | 101.4 | 739        | 10 |
| 48  | 88  | 2.15 | 0.1229 | 0.0020 | 6.195  | 0.1071 | 0.3655 | 0.0046 | 1999 | 15 | 2004 | 15 | 2008 | 22 | 99.6  | 1999       | 15 |
| 49  | 240 | 0.60 | 0.1640 | 0.0024 | 10.562 | 0.1685 | 0.4670 | 0.0057 | 2498 | 12 | 2485 | 15 | 2470 | 25 | 101.1 | 2498       | 12 |
| 50  | 177 | 0.49 | 0.0674 | 0.0013 | 1.225  | 0.0247 | 0.1318 | 0.0017 | 850  | 22 | 812  | 11 | 798  | 10 | 101.8 | 798        | 10 |
| 51  | 207 | 0.32 | 0.1649 | 0.0025 | 10.440 | 0.1686 | 0.4590 | 0.0057 | 2507 | 13 | 2475 | 15 | 2435 | 25 | 103.0 | 2507       | 13 |
| 52  | 173 | 0.77 | 0.1589 | 0.0024 | 9.909  | 0.1620 | 0.4522 | 0.0056 | 2444 | 13 | 2426 | 15 | 2405 | 25 | 101.6 | 2444       | 13 |
| 53  | 83  | 0.65 | 0.1075 | 0.0019 | 4.644  | 0.0844 | 0.3132 | 0.0040 | 1758 | 16 | 1757 | 15 | 1757 | 19 | 100.1 | 1758       | 16 |
| 54  | 71  | 1.21 | 0.1228 | 0.0021 | 6.031  | 0.1088 | 0.3561 | 0.0045 | 1998 | 16 | 1980 | 16 | 1964 | 21 | 101.7 | 1998       | 16 |
| 55  | 82  | 1.13 | 0.1070 | 0.0019 | 4.589  | 0.0839 | 0.3109 | 0.0039 | 1750 | 17 | 1747 | 15 | 1745 | 19 | 100.3 | 1750       | 17 |
| 56  | 56  | 0.76 | 0.1413 | 0.0025 | 7.947  | 0.1480 | 0.4078 | 0.0053 | 2243 | 16 | 2225 | 17 | 2205 | 24 | 101.7 | 2243       | 16 |
| 57  | 332 | 1.06 | 0.0571 | 0.0012 | 0.5500 | 0.0115 | 0.0699 | 0.0009 | 493  | 25 | 445  | 8  | 436  | 5  | 102.1 | 436        | 5  |
| 58  | 160 | 0.89 | 0.0547 | 0.0014 | 0.5000 | 0.0133 | 0.0663 | 0.0009 | 399  | 36 | 412  | 9  | 414  | 5  | 99.5  | 414        | 5  |
| 59  | 428 | 0.75 | 0.1577 | 0.0024 | 9.491  | 0.1547 | 0.4365 | 0.0054 | 2431 | 13 | 2387 | 15 | 2335 | 24 | 104.1 | 2431       | 13 |
| 60  | 319 | 0.68 | 0.0663 | 0.0012 | 1.198  | 0.0220 | 0.1310 | 0.0016 | 815  | 19 | 799  | 10 | 794  | 9  | 100.6 | 794        | 9  |
| 61  | 24  | 0.92 | 0.0633 | 0.0031 | 1.078  | 0.0516 | 0.1235 | 0.0019 | 717  | 76 | 742  | 25 | 751  | 11 | 98.8  | 751        | 11 |
| 62  | 256 | 0.54 | 0.0548 | 0.0012 | 0.5330 | 0.0120 | 0.0705 | 0.0009 | 404  | 28 | 434  | 8  | 439  | 5  | 98.9  | 439        | 5  |
| 63  | 139 | 0.59 | 0.0653 | 0.0014 | 1.149  | 0.0248 | 0.1275 | 0.0016 | 785  | 25 | 777  | 12 | 774  | 9  | 100.4 | 774        | 9  |
| 64  | 282 | 1.19 | 0.1634 | 0.0025 | 10.479 | 0.1738 | 0.4652 | 0.0058 | 2491 | 13 | 2478 | 15 | 2463 | 25 | 101.1 | 2491       | 13 |
| 65  | 216 | 0.57 | 0.0662 | 0.0013 | 1.266  | 0.0248 | 0.1386 | 0.0018 | 814  | 21 | 831  | 11 | 837  | 10 | 99.3  | 837        | 10 |
| 66  | 188 | 0.58 | 0.1483 | 0.0024 | 8.767  | 0.1495 | 0.4288 | 0.0053 | 2326 | 14 | 2314 | 16 | 2300 | 24 | 101.1 | 2326       | 14 |
| 67  | 26  | 0.99 | 0.1102 | 0.0026 | 4.958  | 0.1169 | 0.3264 | 0.0045 | 1802 | 24 | 1812 | 20 | 1821 | 22 | 99.0  | 1802       | 24 |
| 68  | 30  | 1.21 | 0.0636 | 0.0026 | 1.094  | 0.0450 | 0.1248 | 0.0018 | 727  | 62 | 750  | 22 | 758  | 11 | 98.9  | 758        | 11 |
| 69  | 275 | 0.47 | 0.0795 | 0.0014 | 2.220  | 0.0401 | 0.2025 | 0.0025 | 1185 | 18 | 1188 | 13 | 1189 | 14 | 99.7  | 1185       | 18 |
| 70  | 80  | 0.74 | 0.1340 | 0.0023 | 7.265  | 0.1332 | 0.3932 | 0.0050 | 2151 | 16 | 2144 | 16 | 2137 | 23 | 100.7 | 2151       | 16 |
| 71  | 208 | 0.77 | 0.0762 | 0.0014 | 1.883  | 0.0360 | 0.1792 | 0.0023 | 1101 | 19 | 1075 | 13 | 1063 | 12 | 103.6 | 1101       | 19 |
| 72  | 175 | 0.69 | 0.0563 | 0.0014 | 0.5320 | 0.0137 | 0.0686 | 0.0009 | 463  | 34 | 433  | 9  | 427  | 5  | 101.4 | 427        | 5  |
| 73  | 207 | 0.25 | 0.1275 | 0.0021 | 6.563  | 0.1148 | 0.3732 | 0.0047 | 2064 | 15 | 2054 | 15 | 2044 | 22 | 101.0 | 2064       | 15 |
| 74  | 167 | 1.06 | 0.0544 | 0.0014 | 0.5261 | 0.0137 | 0.0701 | 0.0009 | 387  | 35 | 429  | 9  | 437  | 6  | 98.2  | 437        | 6  |
| 75  | 461 | 0.56 | 0.0554 | 0.0011 | 0.5348 | 0.0109 | 0.0700 | 0.0009 | 430  | 24 | 435  | 7  | 436  | 5  | 99.8  | 436        | 5  |
| 76  | 194 | 0.30 | 0.0828 | 0.0015 | 2.415  | 0.0456 | 0.2114 | 0.0027 | 1265 | 19 | 1247 | 14 | 1236 | 14 | 102.3 | 1265       | 19 |
| 77  | 286 | 0.30 | 0.0665 | 0.0012 | 1.240  | 0.0242 | 0.1353 | 0.0017 | 821  | 21 | 819  | 11 | 818  | 10 | 100.1 | 818        | 10 |
| 78  | 199 | 1.08 | 0.0727 | 0.0014 | 1.604  | 0.0321 | 0.1600 | 0.0020 | 1006 | 21 | 972  | 13 | 957  | 11 | 101.6 | 957        | 11 |
| 79  | 114 | 0.97 | 0.1231 | 0.0022 | 6.147  | 0.1136 | 0.3622 | 0.0046 | 2001 | 16 | 1997 | 16 | 1993 | 22 | 100.4 | 2001       | 16 |
| 80  | 579 | 0.02 | 0.1156 | 0.0024 | 5.226  | 0.0874 | 0.3279 | 0.0040 | 1889 | 38 | 1857 | 14 | 1828 | 19 | 103.3 | 1889       | 38 |
| 81  | 212 | 0.75 | 0.0665 | 0.0013 | 1.202  | 0.0249 | 0.1311 | 0.0017 | 822  | 23 | 802  | 11 | 794  | 10 | 101.0 | 794        | 10 |
| 82  | 243 | 0.38 | 0.0681 | 0.0013 | 1.267  | 0.0259 | 0.1349 | 0.0017 | 871  | 22 | 831  | 12 | 816  | 10 | 101.8 | 816        | 10 |
| 83  | 234 | 0.59 | 0.1298 | 0.0023 | 6.601  | 0.1206 | 0.3689 | 0.0047 | 2095 | 16 | 2060 | 16 | 2024 | 22 | 103.5 | 2095       | 16 |
| 84  | 149 | 0.42 | 0.1266 | 0.0023 | 6.310  | 0.1177 | 0.3614 | 0.0046 | 2051 | 16 | 2020 | 16 | 1989 | 22 | 103.1 | 2051       | 16 |
| 85  | 145 | 0.99 | 0.1380 | 0.0025 | 7.148  | 0.1332 | 0.3758 | 0.0048 | 2202 | 16 | 2130 | 17 | 2056 | 22 | 101.7 | 2202       | 16 |
| 86  | 191 | 1.74 | 0.1242 | 0.0022 | 6.113  | 0.1142 | 0.3570 | 0.0045 | 2017 | 17 | 1992 | 16 | 1968 | 22 | 102.5 | 2017       | 17 |
| 87  | 265 | 0.48 | 0.1508 | 0.0026 | 8.843  | 0.1631 | 0.4252 | 0.0054 | 2355 | 16 | 2322 | 17 | 2284 | 24 | 103.1 | 2355       | 16 |
| 88  | 14  | 0.81 | 0.1262 | 0.0034 | 6.657  | 0.1797 | 0.3824 | 0.0056 | 2046 | 28 | 2067 | 24 | 2088 | 26 | 98.0  | 2046       | 28 |
| 89  | 116 | 0.79 | 0.1307 | 0.0024 | 6.663  | 0.1284 | 0.3696 | 0.0047 | 2108 | 17 | 2068 | 17 | 2028 | 22 | 103.9 | 2108       | 17 |
| 90  | 191 | 0.39 | 0.0730 | 0.0015 | 1.626  | 0.0351 | 0.1615 | 0.0021 | 1014 | 24 | 980  | 14 | 965  | 12 | 101.6 | 965        | 12 |
| 91  | 590 | 0.74 | 0.0673 | 0.0012 | 1.242  | 0.0239 | 0.1338 | 0.0017 | 847  | 20 | 820  | 11 | 809  | 10 | 101.4 | 809        | 10 |
| 92  | 237 | 0.96 | 0.0556 | 0.0013 | 0.5685 | 0.0137 | 0.0741 | 0.0010 | 438  | 31 | 457  | 9  | 461  | 6  | 99.1  | 461        | 6  |
| 93  | 813 | 0.20 | 0.0703 | 0.0013 | 1.606  | 0.0303 | 0.1656 | 0.0021 | 937  | 20 | 972  | 12 | 988  | 12 | 98.4  | 988        | 12 |
| 94  | 226 | 0.69 | 0.0730 | 0.0014 | 1.738  | 0.0355 | 0.1726 | 0.0022 | 1014 | 22 | 1023 | 13 | 1027 | 12 | 98.7  | 1014       | 22 |
| 95  | 423 | 0.79 | 0.0564 | 0.0012 | 0.5275 | 0.0116 | 0.0678 | 0.0009 | 470  | 27 | 430  | 8  | 423  | 5  | 101.7 | 423        | 5  |
| 96  | 156 | 0.57 | 0.0666 | 0.0015 | 1.217  | 0.0279 | 0.1325 | 0.0017 | 826  | 27 | 808  | 13 | 802  | 10 | 100.7 | 802        | 10 |
| 97  | 262 | 0.47 | 0.3062 | 0.0054 | 26.545 | 0.4943 | 0.6287 | 0.0080 | 3502 | 14 | 3367 | 18 | 3145 | 31 | 111.4 | Discordant |    |
| 98  | 45  | 1.02 | 0.1266 | 0.0027 | 6.461  | 0.1414 | 0.3700 | 0.0050 | 2052 | 21 | 2041 | 19 | 2029 | 23 | 101.1 | 2052       | 21 |
| 99  | 36  | 1.67 | 0.1566 | 0.0032 | 9.885  | 0.2096 | 0.4579 | 0.0061 | 2419 | 19 | 2424 | 20 | 2430 | 27 | 99.5  | 2419       | 19 |
| 100 | 105 | 0.92 | 0.1637 | 0.0031 | 10.223 | 0.2017 | 0.4529 | 0.0059 | 2494 | 17 | 2455 | 18 | 2408 | 26 | 103.6 | 2494       | 17 |
| 101 | 116 | 0.86 | 0.0562 | 0.0018 | 0.5491 | 0.0172 | 0.0709 | 0.0010 | 458  | 45 | 444  | 11 | 442  | 6  | 100.5 | 442        | 6  |
| 102 | 164 | 1.00 | 0.0550 | 0.0016 | 0.5068 | 0.0146 | 0.0668 | 0.0009 | 411  | 40 | 416  | 10 | 417  | 5  | 99.8  | 417        | 5  |
| 103 | 81  | 0.50 | 0.0628 | 0.0018 | 1.049  | 0.0298 | 0.1211 | 0.0017 | 702  | 37 | 729  | 15 | 737  | 9  | 98.9  | 737        | 9  |
| 104 | 118 | 0.68 | 0.0658 | 0.0016 | 1.235  | 0.0302 | 0.1361 | 0.0018 | 801  | 30 | 817  | 14 | 822  | 10 | 99.4  | 822        | 10 |
| 105 | 179 | 0.48 | 0.1079 | 0.0021 | 4.637  | 0.0939 | 0.3115 | 0.0040 | 1765 | 19 | 1756 | 17 | 1748 | 20 | 101.0 | 1765       | 19 |
| 106 | 108 | 1.87 | 0.1582 | 0.0031 | 9.615  | 0.1953 | 0.4408 | 0.0057 | 2436 | 18 | 2399 | 19 | 2354 | 26 | 103.5 | 2436       | 18 |
| 107 | 40  | 1.81 | 0.1257 | 0.0029 | 6.340  | 0.1473 | 0.3658 | 0.0050 | 2038 | 23 | 2024 | 20 | 2010 | 24 | 101.4 | 2038       | 23 |
| 108 | 316 | 1.30 | 0.0951 | 0.0019 | 3.276  | 0.0666 | 0.2497 | 0.0032 | 1531 | 20 | 1475 | 16 | 1437 | 17 | 106.5 | 1531       | 20 |
| 109 | 29  | 0.73 | 0.1291 | 0.0030 | 6.741  | 0.1604 | 0.3787 | 0.0052 | 2085 | 23 | 2078 | 21 | 2070 | 24 | 100.7 | 2085       | 23 |
| 110 | 204 | 0.59 | 0.1281 | 0.0025 | 6.430  | 0.1314 | 0.3641 | 0.0047 | 2072 | 19 | 2036 | 18 | 2001 | 22 | 103.5 | 2072       | 19 |
| 111 | 200 | 0.55 | 0.0676 | 0.0015 | 1.234  | 0.0281 | 0.1325 | 0.0017 | 856  | 26 | 816  | 13 | 802  | 10 | 101.7 | 802        | 10 |
| 112 | 148 | 1.08 | 0.0531 | 0.0017 | 0.4863 | 0.0157 | 0.0664 | 0.0009 | 334  | 48 | 402  | 11 | 414  | 6  | 97.1  | 414        | 6  |
| 113 | 62  | 1.08 | 0.1735 | 0.0035 | 11.827 | 0.2474 | 0.4943 | 0.0065 | 2592 | 18 | 2591 | 20 | 2589 | 28 | 100.1 | 2592       | 18 |
| 114 | 99  | 0.68 | 0.1495 | 0.0030 | 8.869  | 0.1853 | 0.4302 | 0.0056 | 2340 | 19 | 2325 | 19 | 2306 | 25 | 101.5 | 2340       | 19 |
| 115 | 136 | 0.75 | 0.0666 | 0.0016 | 1.186  | 0.0289 | 0.1292 | 0.0017 | 825  | 29 | 794  | 13 | 783  | 10 | 101.4 | 783        | 10 |
| 116 | 88  | 0.90 | 0.0560 | 0.0019 | 0.5248 | 0.0178 | 0.0680 | 0.0010 | 450  | 50 | 428  | 12 | 424  | 6  | 100.9 | 424        | 6  |
| 117 | 287 | 0.57 | 0.0666 | 0.0014 | 1.261  | 0.0277 | 0.1373 | 0.0018 | 825  | 25 | 828  | 12 | 829  | 10 | 99.9  | 829        | 10 |
| 118 | 183 | 0.55 | 0.0662 | 0.0015 | 1.260  | 0.0291 | 0.1381 | 0.0018 | 812  | 27 | 828  | 13 | 834  | 10 | 99.3  | 834        | 10 |
| 119 | 82  | 0.77 | 0.1427 | 0.0030 | 8.155  | 0.1753 | 0.4144 | 0.0055 | 2260 | 20 | 2248 | 19 | 2235 | 25 | 101.1 | 2260       | 20 |
| 120 | 287 | 0.63 | 0.1364 | 0.0027 | 7.546  | 0.1559 | 0.4011 | 0.0052 | 2182 |    |      |    |      |    |       |            |    |

|        |      |      |      |        |        |        |        |        |        |      |     |      |     |      |    |       |            |     |
|--------|------|------|------|--------|--------|--------|--------|--------|--------|------|-----|------|-----|------|----|-------|------------|-----|
| D13-08 | 107  | 1687 | 0.06 | 0.1062 | 0.0020 | 4.539  | 0.0782 | 0.3100 | 0.0045 | 1735 | 14  | 1738 | 14  | 1741 | 22 | 99.7  | 1735       | 14  |
| D13-09 | 185  | 195  | 0.95 | 0.0608 | 0.0073 | 0.6243 | 0.0700 | 0.0745 | 0.0037 | 633  | 158 | 493  | 44  | 463  | 22 | 106.5 | 463        | 22  |
| D13-10 | 688  | 1355 | 0.51 | 0.0672 | 0.0025 | 0.6994 | 0.0237 | 0.0755 | 0.0015 | 843  | 40  | 538  | 14  | 469  | 9  | 114.7 | Discordant |     |
| D13-11 | 667  | 1047 | 0.64 | 0.0769 | 0.0019 | 1.760  | 0.0392 | 0.1661 | 0.0026 | 1118 | 22  | 1031 | 14  | 991  | 14 | 104.0 | 991        | 14  |
| D13-12 | 284  | 505  | 0.56 | 0.0729 | 0.0050 | 0.7664 | 0.0476 | 0.0763 | 0.0026 | 656  | 290 | 501  | 49  | 467  | 16 | 107.3 | 467        | 16  |
| D13-13 | 42   | 93   | 0.45 | 0.0762 | 0.0077 | 1.930  | 0.1811 | 0.1837 | 0.0097 | 1101 | 106 | 1092 | 63  | 1087 | 53 | 101.3 | 1101       | 106 |
| D13-14 | 166  | 824  | 0.20 | 0.0778 | 0.0021 | 1.787  | 0.0444 | 0.1666 | 0.0028 | 1142 | 25  | 1041 | 16  | 993  | 15 | 104.8 | 993        | 15  |
| D13-16 | 1115 | 2099 | 0.53 | 0.0761 | 0.0023 | 1.796  | 0.0496 | 0.1711 | 0.0031 | 1099 | 28  | 1044 | 18  | 1018 | 17 | 108.0 | 1099       | 28  |
| D13-17 | 787  | 914  | 0.86 | 0.0721 | 0.0028 | 0.7202 | 0.0250 | 0.0725 | 0.0014 | 988  | 39  | 551  | 15  | 451  | 9  | 122.2 | Discordant |     |
| D13-19 | 718  | 1516 | 0.47 | 0.0654 | 0.0043 | 0.7455 | 0.0451 | 0.0828 | 0.0027 | 786  | 74  | 566  | 26  | 513  | 16 | 110.3 | Discordant |     |
| D13-20 | 608  | 1121 | 0.54 | 0.1054 | 0.0024 | 4.127  | 0.0883 | 0.2839 | 0.0048 | 1722 | 18  | 1660 | 17  | 1611 | 24 | 106.9 | 1722       | 18  |
| D13-21 | 795  | 783  | 1.02 | 0.1644 | 0.0046 | 9.978  | 0.2633 | 0.4403 | 0.0104 | 2501 | 20  | 2433 | 24  | 2352 | 46 | 106.3 | 2501       | 20  |
| D13-22 | 246  | 256  | 0.96 | 0.1706 | 0.0038 | 11.503 | 0.2435 | 0.4891 | 0.0095 | 2563 | 16  | 2565 | 20  | 2567 | 41 | 99.8  | 2563       | 16  |
| D13-23 | 530  | 443  | 1.20 | 0.0634 | 0.0045 | 0.6161 | 0.0402 | 0.0705 | 0.0022 | 721  | 87  | 487  | 25  | 439  | 13 | 110.9 | Discordant |     |
| D13-24 | 528  | 686  | 0.77 | 0.0602 | 0.0029 | 0.8183 | 0.0365 | 0.0986 | 0.0022 | 610  | 58  | 607  | 20  | 606  | 13 | 100.2 | 606        | 13  |
| D13-25 | 1139 | 954  | 1.19 | 0.0567 | 0.0030 | 0.6011 | 0.0291 | 0.0768 | 0.0018 | 481  | 65  | 478  | 18  | 477  | 11 | 100.2 | 477        | 11  |
| D13-26 | 44   | 284  | 0.15 | 0.1701 | 0.0037 | 10.807 | 0.2218 | 0.4608 | 0.0087 | 2559 | 15  | 2507 | 19  | 2443 | 38 | 104.7 | 2559       | 15  |
| D13-27 | 372  | 464  | 0.80 | 0.0798 | 0.0026 | 2.000  | 0.0591 | 0.1817 | 0.0035 | 1193 | 30  | 1116 | 20  | 1076 | 19 | 110.9 | Discordant |     |
| D13-28 | 325  | 513  | 0.63 | 0.0750 | 0.0026 | 1.569  | 0.0502 | 0.1518 | 0.0030 | 1068 | 34  | 958  | 20  | 911  | 17 | 105.2 | 911        | 17  |
| D13-29 | 546  | 1052 | 0.52 | 0.0616 | 0.0024 | 0.6348 | 0.0224 | 0.0747 | 0.0014 | 661  | 44  | 499  | 14  | 465  | 9  | 107.3 | 465        | 9   |
| D13-30 | 985  | 1170 | 0.84 | 0.0563 | 0.0033 | 0.5648 | 0.0307 | 0.0728 | 0.0019 | 463  | 75  | 455  | 20  | 453  | 11 | 100.4 | 453        | 11  |
| D13-31 | 174  | 562  | 0.31 | 0.0634 | 0.0030 | 0.7055 | 0.0305 | 0.0807 | 0.0018 | 723  | 54  | 542  | 18  | 500  | 11 | 108.4 | 500        | 11  |
| D13-32 | 204  | 487  | 0.42 | 0.1999 | 0.0033 | 14.098 | 0.2206 | 0.5114 | 0.0078 | 2826 | 12  | 2756 | 15  | 2663 | 33 | 106.1 | 2826       | 12  |
| D13-33 | 184  | 1082 | 0.17 | 0.0845 | 0.0021 | 2.206  | 0.0493 | 0.1894 | 0.0030 | 1235 | 64  | 1156 | 19  | 1114 | 16 | 110.9 | Discordant |     |
| D13-34 | 394  | 945  | 0.42 | 0.0612 | 0.0022 | 0.6066 | 0.0198 | 0.0718 | 0.0013 | 648  | 41  | 481  | 13  | 447  | 8  | 107.6 | 447        | 8   |
| D13-35 | 132  | 745  | 0.18 | 0.1322 | 0.0019 | 6.954  | 0.0960 | 0.3814 | 0.0048 | 2128 | 11  | 2106 | 12  | 2083 | 22 | 102.2 | 2128       | 11  |
| D13-36 | 140  | 1134 | 0.12 | 0.0716 | 0.0018 | 1.328  | 0.0302 | 0.1344 | 0.0020 | 926  | 64  | 843  | 15  | 811  | 11 | 103.9 | 811        | 11  |
| D13-37 | 308  | 206  | 1.50 | 0.1178 | 0.0060 | 2.201  | 0.0988 | 0.1354 | 0.0042 | 746  | 429 | 760  | 101 | 765  | 28 | 99.3  | 765        | 28  |
| D13-38 | 863  | 1056 | 0.82 | 0.0783 | 0.0019 | 1.776  | 0.0393 | 0.1646 | 0.0025 | 945  | 117 | 964  | 33  | 973  | 15 | 99.1  | 973        | 15  |
| D13-39 | 226  | 306  | 0.74 | 0.0650 | 0.0045 | 0.6746 | 0.0434 | 0.0752 | 0.0023 | 775  | 84  | 524  | 26  | 468  | 14 | 112.0 | Discordant |     |
| D13-40 | 653  | 416  | 1.57 | 0.0620 | 0.0062 | 0.7433 | 0.0693 | 0.0869 | 0.0038 | 675  | 126 | 564  | 40  | 537  | 22 | 105.0 | 537        | 22  |
| D13-41 | 421  | 1529 | 0.28 | 0.2011 | 0.0027 | 14.580 | 0.1891 | 0.5259 | 0.0066 | 2835 | 10  | 2788 | 12  | 2724 | 28 | 104.1 | 2835       | 10  |
| D13-42 | 336  | 777  | 0.43 | 0.0573 | 0.0035 | 0.5622 | 0.0318 | 0.0712 | 0.0018 | 502  | 81  | 453  | 21  | 443  | 11 | 102.3 | 443        | 11  |
| D13-43 | 291  | 778  | 0.37 | 0.0618 | 0.0037 | 0.6501 | 0.0358 | 0.0762 | 0.0020 | 669  | 74  | 509  | 22  | 474  | 12 | 107.4 | 474        | 12  |
| D13-44 | 345  | 1558 | 0.22 | 0.1337 | 0.0020 | 6.562  | 0.0936 | 0.3558 | 0.0044 | 2093 | 38  | 2022 | 15  | 1953 | 21 | 107.2 | 2093       | 38  |
| D13-46 | 117  | 289  | 0.41 | 0.0515 | 0.0057 | 0.5350 | 0.0568 | 0.0753 | 0.0027 | 265  | 173 | 435  | 38  | 468  | 16 | 92.9  | 468        | 16  |
| D13-47 | 353  | 1458 | 0.24 | 0.0746 | 0.0021 | 1.685  | 0.0444 | 0.1639 | 0.0027 | 1056 | 28  | 1003 | 17  | 979  | 15 | 102.5 | 979        | 15  |
| D13-48 | 95   | 182  | 0.52 | 0.0614 | 0.0079 | 0.5869 | 0.0709 | 0.0694 | 0.0034 | 652  | 176 | 469  | 45  | 432  | 21 | 108.6 | 432        | 21  |
| D13-49 | 158  | 221  | 0.71 | 0.0592 | 0.0060 | 0.6699 | 0.0643 | 0.0821 | 0.0032 | 574  | 141 | 521  | 39  | 508  | 19 | 102.6 | 508        | 19  |
| D13-50 | 119  | 1407 | 0.08 | 0.0754 | 0.0020 | 1.484  | 0.0355 | 0.1428 | 0.0022 | 1079 | 25  | 924  | 14  | 860  | 12 | 107.4 | 860        | 12  |
| D13-51 | 512  | 500  | 1.02 | 0.1702 | 0.0031 | 11.315 | 0.1966 | 0.4820 | 0.0075 | 2560 | 13  | 2549 | 16  | 2536 | 32 | 100.9 | 2560       | 13  |
| D13-52 | 371  | 885  | 0.42 | 0.0656 | 0.0028 | 0.6271 | 0.0243 | 0.0693 | 0.0014 | 455  | 174 | 431  | 26  | 427  | 9  | 100.9 | 427        | 9   |
| D13-54 | 231  | 460  | 0.50 | 0.0590 | 0.0045 | 0.5384 | 0.0387 | 0.0661 | 0.0021 | 568  | 102 | 437  | 26  | 413  | 13 | 105.8 | 413        | 13  |
| D13-55 | 158  | 511  | 0.31 | 0.0740 | 0.0023 | 1.666  | 0.0480 | 0.1632 | 0.0029 | 1041 | 31  | 996  | 18  | 975  | 16 | 102.2 | 975        | 16  |
| D13-56 | 401  | 1738 | 0.23 | 0.0729 | 0.0017 | 1.546  | 0.0323 | 0.1538 | 0.0021 | 946  | 66  | 927  | 17  | 920  | 12 | 100.8 | 920        | 12  |
| D13-57 | 226  | 603  | 0.38 | 0.0760 | 0.0022 | 1.644  | 0.0428 | 0.1569 | 0.0026 | 1094 | 28  | 987  | 16  | 939  | 14 | 105.1 | 939        | 14  |
| D13-58 | 974  | 1872 | 0.52 | 0.0693 | 0.0018 | 0.7076 | 0.0165 | 0.0740 | 0.0011 | 909  | 26  | 543  | 10  | 460  | 6  | 118.0 | Discordant |     |
| D13-59 | 327  | 534  | 0.61 | 0.0622 | 0.0031 | 0.6122 | 0.0277 | 0.0714 | 0.0017 | 679  | 57  | 485  | 17  | 445  | 10 | 109.0 | 445        | 10  |
| D13-60 | 114  | 190  | 0.60 | 0.2716 | 0.0050 | 23.927 | 0.4397 | 0.6388 | 0.0114 | 3315 | 13  | 3265 | 18  | 3184 | 45 | 104.1 | 3315       | 13  |
| D13-61 | 616  | 144  | 4.28 | 0.1699 | 0.0045 | 11.408 | 0.2865 | 0.4868 | 0.0106 | 2557 | 19  | 2557 | 23  | 2557 | 46 | 100.0 | 2557       | 19  |
| D13-62 | 631  | 570  | 1.11 | 0.0623 | 0.0027 | 0.6581 | 0.0265 | 0.0766 | 0.0016 | 684  | 51  | 513  | 16  | 476  | 10 | 107.8 | 476        | 10  |
| D13-65 | 612  | 1120 | 0.55 | 0.0603 | 0.0022 | 0.6091 | 0.0206 | 0.0732 | 0.0013 | 614  | 43  | 483  | 13  | 456  | 8  | 105.9 | 456        | 8   |
| D13-66 | 213  | 507  | 0.42 | 0.0805 | 0.0028 | 2.144  | 0.0692 | 0.1931 | 0.0039 | 1210 | 33  | 1163 | 22  | 1138 | 21 | 106.3 | 1210       | 33  |
| D13-67 | 554  | 523  | 1.06 | 0.0571 | 0.0036 | 0.5660 | 0.0334 | 0.0719 | 0.0020 | 494  | 81  | 455  | 22  | 448  | 12 | 101.6 | 448        | 12  |
| D13-68 | 1731 | 1295 | 1.34 | 0.1708 | 0.0030 | 9.306  | 0.1531 | 0.3950 | 0.0055 | 2565 | 12  | 2369 | 15  | 2146 | 25 | 119.5 | Discordant |     |
| D13-69 | 594  | 342  | 1.74 | 0.1754 | 0.0039 | 11.646 | 0.2460 | 0.4813 | 0.0088 | 2610 | 16  | 2576 | 20  | 2533 | 38 | 103.0 | 2610       | 16  |
| D13-70 | 290  | 435  | 0.67 | 0.0638 | 0.0039 | 0.6624 | 0.0376 | 0.0753 | 0.0020 | 733  | 75  | 516  | 23  | 468  | 12 | 110.3 | Discordant |     |
| D13-71 | 430  | 510  | 0.84 | 0.0674 | 0.0040 | 0.6997 | 0.0388 | 0.0752 | 0.0020 | 851  | 71  | 539  | 23  | 467  | 12 | 115.4 | Discordant |     |
| D13-72 | 337  | 1537 | 0.22 | 0.0762 | 0.0018 | 1.725  | 0.0380 | 0.1640 | 0.0023 | 1101 | 23  | 1018 | 14  | 979  | 13 | 104.0 | 979        | 13  |
| D13-73 | 186  | 358  | 0.52 | 0.0658 | 0.0040 | 0.6593 | 0.0375 | 0.0727 | 0.0020 | 799  | 75  | 514  | 23  | 452  | 12 | 113.7 | Discordant |     |
| D13-74 | 294  | 429  | 0.69 | 0.1102 | 0.0027 | 4.790  | 0.1078 | 0.3151 | 0.0052 | 1803 | 20  | 1783 | 19  | 1766 | 26 | 102.1 | 1803       | 20  |
| D13-75 | 151  | 132  | 1.14 | 0.1064 | 0.0048 | 4.142  | 0.1741 | 0.2821 | 0.0083 | 1739 | 38  | 1663 | 34  | 1602 | 42 | 108.6 | 1739       | 38  |
| D13-76 | 456  | 538  | 0.85 | 0.1800 | 0.0033 | 11.764 | 0.2069 | 0.4738 | 0.0070 | 2653 | 13  | 2586 | 16  | 2500 | 31 | 106.1 | 2653       | 13  |
| D13-77 | 531  | 1475 | 0.36 | 0.0624 | 0.0022 | 0.6078 | 0.0200 | 0.0706 | 0.0012 | 689  | 41  | 482  | 13  | 440  | 7  | 109.5 | 440        | 7   |
| D13-78 | 724  | 1370 | 0.53 | 0.0607 | 0.0024 | 0.6129 | 0.0220 | 0.0732 | 0.0014 | 629  | 46  | 485  | 14  | 455  | 8  | 106.6 | 455        | 8   |
| D13-79 | 103  | 172  | 0.60 | 0.0847 | 0.0053 | 2.139  | 0.1221 | 0.1830 | 0.0063 | 1309 | 60  | 1161 | 40  | 1083 | 34 | 120.9 | Discordant |     |
| D13-80 | 444  | 838  | 0.53 | 0.0744 | 0.0024 | 1.658  | 0.0499 | 0.1616 | 0.0029 | 1052 | 33  | 993  | 19  | 966  | 16 | 102.8 | 966        | 16  |

Sample LT19A, quartz arenite, Late Silurian-Early Devonian Keziertage Formation in Keping-Subashi section of the Kepingtage area of northern Tarim, (Han et al., 2015, Tectonics)

|           |     |     |      |        |        |        |        |        |        |      |    |      |    |      |    |       |            |    |
|-----------|-----|-----|------|--------|--------|--------|--------|--------|--------|------|----|------|----|------|----|-------|------------|----|
| LT19A-001 | 112 | 145 | 0.78 | 0.0796 | 0.0017 | 2.214  | 0.0490 | 0.2017 | 0.0027 | 1186 | 43 | 1185 | 15 | 1184 | 14 | 100.2 | 1186       | 43 |
| LT19A-002 | 380 | 478 | 0.79 | 0.0635 | 0.0014 | 0.6540 | 0.0150 | 0.0746 | 0.0010 | 726  | 48 | 511  | 9  | 464  | 6  | 110.1 | Discordant |    |
| LT19A-003 | 46  | 77  | 0.60 | 0.1660 | 0.0032 | 10.844 | 0.2180 | 0.4737 | 0.0065 | 2517 | 33 | 2510 | 19 | 2500 | 29 | 100.7 | 2517       | 33 |
| LT19A-004 | 132 | 474 | 0.28 | 0.0580 | 0.0013 | 0.5740 | 0.0130 | 0.0718 | 0.0010 | 531  | 50 | 461  | 9  | 447  | 6  | 103.1 | 447        | 6  |
| LT19A-005 | 48  | 59  | 0.82 | 0.1611 | 0.0032 | 9.849  | 0.2590 | 0.4434 | 0.0067 | 2467 | 34 | 2421 | 24 | 2366 | 30 | 100.3 | 2467       | 34 |
| LT19A-006 | 52  | 374 | 0.14 | 0.0755 | 0.0014 | 1.884  | 0.0360 | 0.1809 | 0.0023 | 1082 | 37 | 1075 | 13 | 1072 | 13 | 104.9 | 1082       | 37 |
| LT19A-007 | 265 | 230 | 1.15 | 0.0571 | 0.0015 | 0.6000 | 0.0160 | 0.0762 | 0.0010 | 497  | 60 | 477  | 10 | 473  | 6  | 100.8 | 473        | 6  |
| LT19A-008 | 145 | 278 | 0.52 | 0.0689 | 0.0014 | 1.298  | 0.0280 | 0.1366 | 0.0018 | 895  | 43 | 845  | 12 | 826  | 10 | 102.3 | 826        | 10 |
| LT19A-009 | 86  | 299 | 0.29 | 0.1554 | 0.0026 | 7.906  | 0.1430 | 0.3689 | 0.0048 | 2406 | 28 | 2220 | 16 | 2024 | 23 | 118.9 | Discordant |    |
| LT19A-010 | 415 | 498 | 0.83 | 0.1609 | 0.0026 | 10.750 | 0.1860 | 0.4843 | 0.0062 | 2465 | 26 | 2502 | 16 | 2546 | 27 | 96.8  | 2465       | 26 |
| LT19A-011 | 133 | 82  | 1.62 | 0.0913 | 0.0021 | 3.311  | 0.0770 | 0.2629 | 0.0036 | 1453 | 41 | 1484 | 18 | 1505 | 19 | 96.5  | 1453       | 41 |
| LT19A-012 | 255 | 451 | 0.57 | 0.0638 | 0.0013 | 1.019  | 0.0210 | 0.1157 | 0.0015 | 736  | 40 | 713  | 11 | 706  | 9  | 101.7 | 706        | 9  |
| LT19A-013 | 55  | 92  | 0.60 | 0.0746 | 0.0019 | 1.672  | 0.0440 | 0.1626 | 0.0023 | 1056 | 50 | 998  | 17 | 971  | 13 | 102.8 | 971        | 13 |
| LT19A-014 | 50  | 293 | 0.17 | 0.0688 | 0.0014 | 1.389  | 0.0290 | 0.1463 | 0.0019 | 893  | 40 | 884  | 12 | 880  | 11 | 100.5 | 880        | 11 |
| LT19A-015 | 38  | 62  | 0.61 | 0.0752 | 0.0022 | 1.851  | 0.0540 | 0.1786 | 0.0026 | 1073 | 56 | 1064 | 19 | 1059 | 14 | 101.3 | 1073       | 56 |
| LT19A-016 | 145 | 322 | 0.45 | 0.0591 | 0.0014 | 0.6390 | 0.0160 | 0.0784 | 0.0011 | 569  | 50 | 501  | 10 | 486  | 6  | 103.1 | 486        | 6  |
| LT19A-017 | 152 | 354 | 0.43 | 0.0802 | 0.0015 | 2.275  | 0.0440 | 0.2057 | 0.0027 | 1201 | 34 | 1205 | 14 | 1206 | 14 | 99.6  | 1201       | 34 |
| LT19A-018 | 144 | 248 | 0.58 | 0.0741 | 0.0015 | 1.796  | 0.0370 | 0.1756 | 0.0023 | 1045 | 39 | 1044 | 14 | 1043 | 13 | 100.2 | 1045       | 39 |
| LT19A-019 | 197 | 278 | 0.71 | 0.0737 | 0.0015 | 1.744  | 0.0360 | 0.1716 | 0.0022 | 1034 | 38 | 1025 | 13 | 1021 | 12 | 101.3 | 1034       | 38 |
| LT19A-020 | 34  | 67  | 0.51 | 0.0624 | 0.0022 | 1.006  | 0.0360 | 0.1170 | 0.0018 | 687  | 72 | 707  | 18 | 713  | 10 | 99.2  | 713        | 10 |
| LT19A-021 | 142 | 276 | 0.51 | 0.0638 | 0.0014 | 1.133  | 0.0250 | 0.1287 | 0.0017 | 736  | 44 | 769  | 12 | 780  | 10 | 98.6  | 780        | 10 |
| LT19A-022 | 17  | 22  | 0.76 | 0.1131 | 0.0037 | 4.878  | 0.1600 | 0.3127 | 0.0053 | 1850 | 57 | 1798 | 28 | 1754 | 26 | 105.5 | 1850       | 57 |
| LT19A-023 | 121 | 154 | 0.78 | 0.0626 | 0.0017 | 0.8470 | 0.0240 | 0.0982 | 0.0014 | 693  | 56 | 623  | 13 | 604  | 8  | 103.1 | 604        | 8  |
| LT19A-024 | 99  | 182 | 0.55 | 0.0752 | 0.0017 | 1.728  | 0.0390 | 0.1665 | 0.0022 | 1074 | 42 | 1019 | 15 | 993  | 12 | 102.6 | 993        | 12 |
| LT19A-025 | 216 | 358 | 0.60 | 0.0578 | 0.0014 | 0.5700 | 0.0140 | 0.0715 | 0.0010 | 523  | 50 | 458  | 9  | 445  | 6  | 102.9 | 445        | 6  |
| LT19A-026 | 79  | 135 | 0.58 | 0.0756 | 0.0018 | 1.723  | 0.0410 | 0.1652 | 0.0023 | 1084 | 45 | 1017 | 15 | 986  | 12 | 103.1 | 986        | 12 |
| LT19A-027 | 279 | 369 | 0.75 | 0.0609 | 0.0013 | 0.8650 | 0.0190 | 0.1030 | 0.0014 | 637  | 45 | 633  | 10 | 632  | 8  | 100.2 | 632        | 8  |
| LT19A-028 | 44  | 114 | 0.39 | 0.0953 | 0.0020 | 3.170  | 0.0690 | 0.2411 | 0.0033 | 1535 | 38 | 1450 | 17 | 1392 | 17 | 110.3 | Discordant |    |
| LT19A-029 | 49  | 34  | 1.41 | 0.1161 | 0.0030 | 4.934  | 0.1290 | 0.3082 | 0.0046 | 1897 | 44 | 1808 | 22 | 1732 | 23 | 109.5 | 1897       | 44 |
| LT19A-030 | 65  | 89  | 0.74 | 0.0634 | 0.0024 | 0.6110 | 0.0230 | 0.0699 | 0.0011 | 722  | 78 | 484  | 15 | 436  | 7  | 111.0 | Discordant |    |
| LT19A-031 | 52  | 92  | 0.56 | 0.0733 | 0.0029 | 1.288  | 0.0590 | 0.1275 | 0.0020 | 1021 | 78 | 840  | 26 | 774  | 11 | 108.5 | 774        | 11 |
| LT19A-032 | 72  | 300 | 0.24 | 0.1115 | 0.0020 | 4.640  | 0.0880 | 0.3016 | 0.0039 | 1824 | 32 | 1756 | 16 | 1699 | 19 | 107.4 | 1824       | 32 |
| LT19A-033 | 66  | 100 | 0.66 | 0.1094 | 0.0022 | 5.166  | 0.1090 | 0.3424 | 0.0046 | 1789 | 36 | 1847 | 18 | 1898 | 22 | 94.3  | 1789       | 36 |
| LT19A-034 | 377 | 297 | 1.27 | 0.0826 | 0.0016 | 2.585  | 0.0520 | 0.2268 | 0.0030 | 1261 | 37 | 1296 | 15 | 1317 | 16 | 95.7  | 1261       | 37 |
| LT19A-035 | 46  | 87  | 0.53 | 0.1843 | 0.0034 | 12.948 | 0.2540 | 0.5094 | 0.0069 | 2692 | 30 | 2676 | 18 | 2654 | 29 | 101.4 | 2692       | 30 |
| LT19A-036 | 135 | 114 | 1.18 | 0.0751 | 0.0019 | 1.697  | 0.0440 | 0.1638 | 0.0023 | 1072 | 50 | 1008 | 16 | 978  | 13 | 103.1 | 978        | 13 |
| LT19A-037 | 301 | 399 | 0.75 | 0.0582 | 0.0015 | 0.5450 | 0.0140 | 0.0680 | 0.0009 | 536  | 54 | 442  | 9  | 424  | 6  | 104.2 | 424        | 6  |
| LT19A-038 | 92  | 146 | 0.63 | 0.1573 | 0.0029 | 9.882  | 0.1920 | 0.4554 | 0.0060 | 2427 | 31 | 2424 | 18 | 2419 | 27 | 100.3 | 2427       | 31 |
| LT19A-039 | 206 | 262 | 0.79 | 0.0560 | 0.0016 | 0.5480 | 0.0160 | 0.0711 | 0.0010 | 450  | 63 | 444  | 10 | 443  | 6  | 100.2 | 443        | 6  |
| LT19A-040 | 70  | 154 | 0.46 | 0.0539 | 0.0018 | 0.5600 | 0.0190 | 0.0753 | 0.0011 | 367  | 73 | 451  | 12 | 468  | 7  | 96.4  | 468        | 7  |
| LT19A-041 | 96  | 327 | 0.29 | 0.0735 | 0.0015 | 1.690  | 0.0430 | 0.1669 | 0.0022 | 1026 | 40 | 1005 | 16 | 995  | 12 | 101.0 | 995        | 12 |
| LT19A-042 | 66  | 182 | 0.36 | 0.0647 | 0.0016 | 1.161  | 0.0290 | 0.1302 | 0.0018 | 763  | 51 | 782  | 14 | 789  | 10 | 99.1  | 789        | 10 |
| LT19A-043 | 11  | 84  | 0.13 | 0.0764 | 0.0022 | 2.010  | 0.0590 | 0.1908 | 0.0028 | 1106 | 57 | 1119 | 20 | 1125 | 15 | 98.3  | 1106       | 57 |
| LT19A-044 | 53  | 195 | 0.27 | 0.1151 | 0.0023 | 4.593  | 0.0940 | 0.2895 | 0.0038 | 1881 | 35 | 1748 | 17 | 1639 | 19 | 114.8 | Discordant |    |
| LT19A-045 | 78  | 429 | 0.18 | 0.1039 | 0.0020 | 2.638  | 0.0530 | 0.1841 | 0.0024 | 1695 | 35 | 1311 | 15 | 1089 | 13 | 155.6 | Discordant |    |
| LT19A-046 | 117 | 105 | 1.12 | 0.0665 | 0.0019 | 1.161  | 0.0340 | 0.1267 | 0.0018 | 822  | 60 | 783  | 16 | 769  | 10 | 101.8 | 769        | 10 |
| LT19A-047 | 136 | 180 | 0.76 | 0.0661 | 0.0017 | 1.008  | 0.0260 | 0.1106 | 0.0015 | 810  | 53 | 708  | 13 | 676  | 9  | 104.7 | 676        | 9  |
| LT19A-048 | 95  | 110 | 0.87 | 0.1629 | 0.0032 | 10.831 | 0.2200 | 0.4822 | 0.0065 | 2486 | 32 | 2509 | 19 | 2537 | 28 | 98.0  | 2486       | 32 |
| LT19A-049 | 246 | 392 | 0.63 | 0.0766 | 0.0015 | 1.956  | 0.0410 | 0.1852 | 0.0024 | 1110 | 39 | 1101 | 14 | 1095 | 13 | 101.4 | 1110       | 39 |
| LT19A-050 | 281 | 179 | 1.57 | 0.0702 | 0.0017 | 1.536  | 0.0370 | 0.1586 | 0.0022 | 935  | 48 | 945  | 15 | 949  | 12 | 99.6  | 949        | 12 |

|           |     |      |      |        |        |        |        |        |        |      |     |      |    |      |    |       |            |    |
|-----------|-----|------|------|--------|--------|--------|--------|--------|--------|------|-----|------|----|------|----|-------|------------|----|
| LT19A-051 | 92  | 226  | 0.41 | 0.1256 | 0.0024 | 6.691  | 0.1350 | 0.3863 | 0.0051 | 2037 | 33  | 2071 | 18 | 2106 | 24 | 96.7  | 2037       | 33 |
| LT19A-052 | 170 | 396  | 0.43 | 0.1241 | 0.0024 | 6.133  | 0.1220 | 0.3584 | 0.0047 | 2016 | 33  | 1995 | 17 | 1974 | 22 | 102.1 | 2016       | 33 |
| LT19A-053 | 111 | 128  | 0.87 | 0.0794 | 0.0020 | 1.854  | 0.0470 | 0.1694 | 0.0024 | 1182 | 48  | 1065 | 17 | 1009 | 13 | 117.1 | Discordant |    |
| LT19A-054 | 117 | 196  | 0.60 | 0.2065 | 0.0039 | 14.974 | 0.2980 | 0.5258 | 0.0069 | 2878 | 30  | 2814 | 19 | 2724 | 29 | 105.7 | 2878       | 30 |
| LT19A-055 | 119 | 89   | 1.33 | 0.1220 | 0.0026 | 6.016  | 0.1340 | 0.3577 | 0.0049 | 1985 | 37  | 1978 | 19 | 1971 | 23 | 100.7 | 1985       | 37 |
| LT19A-056 | 161 | 111  | 1.45 | 0.0671 | 0.0019 | 1.252  | 0.0360 | 0.1352 | 0.0019 | 842  | 58  | 824  | 16 | 818  | 11 | 100.7 | 818        | 11 |
| LT19A-057 | 66  | 261  | 0.25 | 0.0721 | 0.0016 | 1.631  | 0.0370 | 0.1641 | 0.0022 | 988  | 44  | 982  | 14 | 979  | 12 | 100.3 | 979        | 12 |
| LT19A-058 | 84  | 264  | 0.32 | 0.0573 | 0.0016 | 0.5760 | 0.0160 | 0.0728 | 0.0010 | 505  | 60  | 462  | 10 | 453  | 6  | 102.0 | 453        | 6  |
| LT19A-059 | 89  | 169  | 0.53 | 0.0628 | 0.0018 | 0.8340 | 0.0240 | 0.0963 | 0.0014 | 702  | 59  | 616  | 13 | 592  | 8  | 104.1 | 592        | 8  |
| LT19A-060 | 41  | 58   | 0.71 | 0.2852 | 0.0059 | 25.735 | 0.5530 | 0.6543 | 0.0093 | 3392 | 31  | 3337 | 21 | 3245 | 36 | 104.5 | 3392       | 31 |
| LT19A-061 | 37  | 53   | 0.70 | 0.1648 | 0.0037 | 10.352 | 0.2390 | 0.4555 | 0.0065 | 2506 | 37  | 2467 | 21 | 2420 | 29 | 103.6 | 2506       | 37 |
| LT19A-062 | 107 | 351  | 0.31 | 0.0644 | 0.0018 | 1.084  | 0.0300 | 0.1221 | 0.0017 | 755  | 56  | 746  | 15 | 742  | 10 | 100.5 | 742        | 10 |
| LT19A-063 | 173 | 249  | 0.69 | 0.0755 | 0.0017 | 2.041  | 0.0470 | 0.1959 | 0.0026 | 1083 | 44  | 1129 | 16 | 1153 | 14 | 93.9  | 1083       | 44 |
| LT19A-064 | 123 | 328  | 0.37 | 0.0580 | 0.0016 | 0.5760 | 0.0160 | 0.0720 | 0.0010 | 530  | 57  | 462  | 10 | 448  | 6  | 103.1 | 448        | 6  |
| LT19A-065 | 51  | 374  | 0.14 | 0.0685 | 0.0016 | 1.402  | 0.0330 | 0.1484 | 0.0020 | 885  | 47  | 890  | 14 | 892  | 11 | 99.8  | 892        | 11 |
| LT19A-066 | 72  | 159  | 0.45 | 0.0691 | 0.0018 | 1.328  | 0.0350 | 0.1392 | 0.0020 | 903  | 53  | 858  | 15 | 840  | 11 | 102.1 | 840        | 11 |
| LT19A-067 | 114 | 222  | 0.51 | 0.0565 | 0.0017 | 0.5770 | 0.0170 | 0.0741 | 0.0011 | 472  | 64  | 463  | 11 | 461  | 6  | 100.4 | 461        | 6  |
| LT19A-068 | 267 | 265  | 1.01 | 0.0565 | 0.0016 | 0.5500 | 0.0160 | 0.0705 | 0.0010 | 473  | 63  | 445  | 10 | 439  | 6  | 101.4 | 439        | 6  |
| LT19A-069 | 287 | 242  | 1.19 | 0.0932 | 0.0021 | 3.359  | 0.0760 | 0.2614 | 0.0035 | 1491 | 41  | 1495 | 18 | 1497 | 18 | 99.6  | 1491       | 41 |
| LT19A-070 | 58  | 79   | 0.74 | 0.0893 | 0.0024 | 2.924  | 0.0780 | 0.2375 | 0.0034 | 1410 | 49  | 1388 | 20 | 1374 | 18 | 102.6 | 1410       | 49 |
| LT19A-071 | 127 | 231  | 0.55 | 0.1627 | 0.0034 | 9.602  | 0.2090 | 0.4279 | 0.0058 | 2484 | 35  | 2397 | 20 | 2296 | 26 | 108.2 | 2484       | 35 |
| LT19A-072 | 163 | 103  | 1.59 | 0.0722 | 0.0021 | 1.501  | 0.0440 | 0.1508 | 0.0022 | 990  | 58  | 931  | 18 | 906  | 12 | 102.8 | 906        | 12 |
| LT19A-073 | 26  | 61   | 0.42 | 0.0925 | 0.0025 | 3.386  | 0.0930 | 0.2655 | 0.0039 | 1478 | 50  | 1501 | 22 | 1518 | 20 | 97.4  | 1478       | 50 |
| LT19A-074 | 201 | 228  | 0.88 | 0.0643 | 0.0017 | 1.147  | 0.0300 | 0.1293 | 0.0018 | 753  | 53  | 776  | 14 | 784  | 10 | 99.0  | 784        | 10 |
| LT19A-075 | 99  | 184  | 0.54 | 0.1872 | 0.0040 | 12.830 | 0.2820 | 0.4969 | 0.0067 | 2718 | 34  | 2667 | 21 | 2601 | 29 | 104.5 | 2718       | 34 |
| LT19A-076 | 73  | 84   | 0.86 | 0.1764 | 0.0040 | 12.435 | 0.2850 | 0.5112 | 0.0071 | 2619 | 37  | 2638 | 22 | 2662 | 30 | 98.4  | 2619       | 37 |
| LT19A-077 | 16  | 52   | 0.31 | 0.1595 | 0.0038 | 9.745  | 0.2390 | 0.4431 | 0.0064 | 2450 | 40  | 2411 | 23 | 2364 | 29 | 103.6 | 2450       | 40 |
| LT19A-078 | 73  | 159  | 0.46 | 0.1988 | 0.0043 | 14.961 | 0.3350 | 0.5459 | 0.0074 | 2816 | 35  | 2813 | 21 | 2808 | 31 | 100.3 | 2816       | 35 |
| LT19A-079 | 222 | 414  | 0.54 | 0.0573 | 0.0015 | 0.5730 | 0.0150 | 0.0725 | 0.0010 | 504  | 58  | 460  | 10 | 451  | 6  | 102.0 | 451        | 6  |
| LT19A-080 | 200 | 234  | 0.85 | 0.0585 | 0.0019 | 0.5700 | 0.0180 | 0.0706 | 0.0010 | 548  | 69  | 458  | 12 | 440  | 6  | 104.1 | 440        | 6  |
| LT19A-081 | 73  | 126  | 0.57 | 0.2363 | 0.0052 | 20.538 | 0.4650 | 0.6304 | 0.0086 | 3095 | 35  | 3117 | 22 | 3151 | 34 | 98.2  | 3095       | 35 |
| LT19A-082 | 117 | 98   | 1.19 | 0.0670 | 0.0022 | 1.001  | 0.0330 | 0.1084 | 0.0016 | 837  | 69  | 704  | 17 | 664  | 9  | 106.0 | 664        | 9  |
| LT19A-083 | 100 | 342  | 0.29 | 0.0699 | 0.0017 | 1.531  | 0.0380 | 0.1589 | 0.0022 | 925  | 49  | 943  | 15 | 951  | 12 | 99.2  | 951        | 12 |
| LT19A-084 | 29  | 59   | 0.49 | 0.0733 | 0.0026 | 1.406  | 0.0500 | 0.1392 | 0.0022 | 1021 | 72  | 891  | 21 | 840  | 12 | 106.1 | 840        | 12 |
| LT19A-085 | 81  | 114  | 0.71 | 0.1572 | 0.0037 | 10.308 | 0.2460 | 0.4756 | 0.0066 | 2426 | 39  | 2463 | 22 | 2508 | 29 | 96.7  | 2426       | 39 |
| LT19A-086 | 63  | 205  | 0.31 | 0.0612 | 0.0019 | 0.6910 | 0.0210 | 0.0819 | 0.0012 | 645  | 65  | 533  | 13 | 507  | 7  | 105.1 | 507        | 7  |
| LT19A-087 | 44  | 50   | 0.88 | 0.0483 | 0.0026 | 0.5450 | 0.0290 | 0.0820 | 0.0014 | 113  | 118 | 442  | 19 | 508  | 9  | 87.0  | Discordant |    |
| LT19A-088 | 68  | 126  | 0.54 | 0.0626 | 0.0021 | 0.9020 | 0.0290 | 0.1045 | 0.0016 | 694  | 69  | 653  | 16 | 641  | 9  | 101.9 | 641        | 9  |
| LT19A-089 | 123 | 412  | 0.30 | 0.0552 | 0.0016 | 0.5100 | 0.0150 | 0.0670 | 0.0010 | 421  | 64  | 419  | 10 | 418  | 6  | 100.2 | 418        | 6  |
| LT19A-090 | 219 | 213  | 1.03 | 0.0747 | 0.0024 | 1.573  | 0.0500 | 0.1528 | 0.0023 | 1059 | 63  | 959  | 20 | 916  | 13 | 104.7 | 916        | 13 |
| LT19A-091 | 44  | 97   | 0.45 | 0.1392 | 0.0034 | 7.495  | 0.1880 | 0.3905 | 0.0055 | 2217 | 42  | 2172 | 22 | 2125 | 26 | 104.3 | 2217       | 42 |
| LT19A-092 | 139 | 297  | 0.47 | 0.0740 | 0.0019 | 1.644  | 0.0420 | 0.1612 | 0.0022 | 1040 | 51  | 987  | 16 | 964  | 12 | 102.4 | 964        | 12 |
| LT19A-093 | 62  | 99   | 0.63 | 0.0675 | 0.0022 | 1.341  | 0.0440 | 0.1441 | 0.0022 | 852  | 68  | 863  | 19 | 868  | 12 | 99.4  | 868        | 12 |
| LT19A-094 | 83  | 442  | 0.19 | 0.0695 | 0.0017 | 1.533  | 0.0390 | 0.1599 | 0.0022 | 914  | 51  | 944  | 16 | 956  | 12 | 98.7  | 956        | 12 |
| LT19A-095 | 241 | 1010 | 0.24 | 0.0558 | 0.0014 | 0.5090 | 0.0130 | 0.0662 | 0.0009 | 443  | 56  | 418  | 9  | 413  | 6  | 101.2 | 413        | 6  |
| LT19A-096 | 169 | 346  | 0.49 | 0.0984 | 0.0024 | 3.816  | 0.0940 | 0.2813 | 0.0039 | 1594 | 45  | 1596 | 20 | 1598 | 20 | 99.7  | 1594       | 45 |
| LT19A-097 | 32  | 58   | 0.56 | 0.0696 | 0.0024 | 1.730  | 0.0600 | 0.1803 | 0.0028 | 916  | 71  | 1020 | 22 | 1069 | 15 | 85.7  | Discordant |    |
| LT19A-098 | 174 | 186  | 0.94 | 0.0560 | 0.0019 | 0.5520 | 0.0190 | 0.0715 | 0.0011 | 451  | 75  | 446  | 12 | 445  | 6  | 100.2 | 445        | 6  |
| LT19A-099 | 173 | 203  | 0.85 | 0.0690 | 0.0019 | 1.389  | 0.0390 | 0.1460 | 0.0021 | 898  | 57  | 884  | 17 | 879  | 12 | 100.6 | 879        | 12 |
| LT19A-100 | 304 | 356  | 0.85 | 0.1103 | 0.0027 | 3.417  | 0.0860 | 0.2248 | 0.0031 | 1804 | 45  | 1508 | 20 | 1307 | 16 | 138.0 | Discordant |    |
| LT19A-101 | 26  | 28   | 0.92 | 0.0601 | 0.0035 | 0.8410 | 0.0490 | 0.1016 | 0.0020 | 605  | 127 | 620  | 27 | 624  | 12 | 99.4  | 624        | 12 |
| LT19A-102 | 147 | 97   | 1.52 | 0.0591 | 0.0022 | 0.7830 | 0.0300 | 0.0961 | 0.0015 | 571  | 82  | 587  | 17 | 592  | 9  | 99.2  | 592        | 9  |
| LT19A-103 | 91  | 79   | 1.14 | 0.1499 | 0.0047 | 8.087  | 0.3250 | 0.3913 | 0.0068 | 2344 | 50  | 2241 | 36 | 2129 | 32 | 110.1 | Discordant |    |
| LT19A-104 | 273 | 282  | 0.97 | 0.0622 | 0.0032 | 0.5760 | 0.0360 | 0.0672 | 0.0012 | 680  | 104 | 462  | 23 | 419  | 7  | 110.3 | Discordant |    |
| LT19A-105 | 241 | 294  | 0.82 | 0.0579 | 0.0018 | 0.5340 | 0.0170 | 0.0670 | 0.0010 | 524  | 65  | 435  | 11 | 418  | 6  | 104.1 | 418        | 6  |
| LT19A-106 | 225 | 490  | 0.46 | 0.0558 | 0.0016 | 0.5330 | 0.0160 | 0.0692 | 0.0010 | 445  | 61  | 434  | 10 | 431  | 6  | 100.7 | 431        | 6  |

Sample LT20A, quartz arenite, Late Silurian-Early Devonian Keziertage Formation in Keping-Subashi section of the Kepingtage area of northern Tarim, (Han et al., 2015, Tectonics)

|           |     |     |      |        |        |        |        |        |        |      |    |      |    |      |    |       |            |    |
|-----------|-----|-----|------|--------|--------|--------|--------|--------|--------|------|----|------|----|------|----|-------|------------|----|
| LT20A-001 | 149 | 440 | 0.34 | 0.0719 | 0.0013 | 1.619  | 0.0310 | 0.1635 | 0.0021 | 982  | 37 | 978  | 12 | 976  | 11 | 100.2 | 976        | 11 |
| LT20A-002 | 140 | 206 | 0.68 | 0.0673 | 0.0016 | 1.232  | 0.0290 | 0.1329 | 0.0018 | 847  | 48 | 815  | 13 | 804  | 10 | 101.4 | 804        | 10 |
| LT20A-003 | 165 | 171 | 0.96 | 0.0554 | 0.0017 | 0.5590 | 0.0170 | 0.0733 | 0.0010 | 428  | 68 | 451  | 11 | 456  | 6  | 98.9  | 456        | 6  |
| LT20A-004 | 275 | 373 | 0.74 | 0.1063 | 0.0018 | 4.557  | 0.0820 | 0.3111 | 0.0039 | 1737 | 31 | 1741 | 15 | 1746 | 19 | 99.5  | 1737       | 31 |
| LT20A-005 | 34  | 51  | 0.67 | 0.1299 | 0.0028 | 6.870  | 0.1500 | 0.3839 | 0.0053 | 2096 | 37 | 2095 | 19 | 2094 | 25 | 100.1 | 2096       | 37 |
| LT20A-006 | 252 | 298 | 0.84 | 0.0699 | 0.0014 | 1.533  | 0.0320 | 0.1591 | 0.0021 | 926  | 41 | 944  | 13 | 952  | 11 | 99.2  | 952        | 11 |
| LT20A-007 | 88  | 104 | 0.85 | 0.0655 | 0.0019 | 1.185  | 0.0340 | 0.1312 | 0.0018 | 791  | 59 | 794  | 16 | 795  | 10 | 99.9  | 795        | 10 |
| LT20A-008 | 107 | 377 | 0.28 | 0.0728 | 0.0014 | 1.711  | 0.0340 | 0.1705 | 0.0022 | 1008 | 38 | 1013 | 13 | 1015 | 12 | 99.3  | 1008       | 38 |
| LT20A-009 | 78  | 59  | 1.32 | 0.0635 | 0.0024 | 1.082  | 0.0400 | 0.1235 | 0.0019 | 726  | 78 | 745  | 19 | 751  | 11 | 99.2  | 751        | 11 |
| LT20A-010 | 84  | 126 | 0.67 | 0.1125 | 0.0022 | 5.088  | 0.1010 | 0.3283 | 0.0043 | 1839 | 35 | 1834 | 17 | 1830 | 21 | 100.5 | 1839       | 35 |
| LT20A-011 | 48  | 51  | 0.95 | 0.0724 | 0.0024 | 1.693  | 0.0560 | 0.1696 | 0.0026 | 998  | 66 | 1006 | 21 | 1010 | 14 | 98.8  | 998        | 66 |
| LT20A-012 | 19  | 46  | 0.41 | 0.0620 | 0.0026 | 1.036  | 0.0430 | 0.1212 | 0.0019 | 675  | 90 | 722  | 22 | 737  | 11 | 98.0  | 737        | 11 |
| LT20A-013 | 127 | 201 | 0.63 | 0.1619 | 0.0028 | 10.436 | 0.1890 | 0.4676 | 0.0060 | 2476 | 29 | 2474 | 17 | 2473 | 26 | 100.1 | 2476       | 29 |
| LT20A-014 | 26  | 42  | 0.62 | 0.1490 | 0.0032 | 9.205  | 0.2010 | 0.4482 | 0.0063 | 2335 | 36 | 2359 | 20 | 2387 | 28 | 97.8  | 2335       | 36 |
| LT20A-015 | 21  | 28  | 0.74 | 0.1117 | 0.0031 | 5.199  | 0.1450 | 0.3378 | 0.0052 | 1827 | 50 | 1852 | 24 | 1876 | 25 | 97.4  | 1827       | 50 |
| LT20A-016 | 241 | 244 | 0.99 | 0.1632 | 0.0028 | 10.536 | 0.1920 | 0.4684 | 0.0060 | 2489 | 29 | 2483 | 17 | 2477 | 26 | 100.5 | 2489       | 29 |
| LT20A-017 | 54  | 281 | 0.19 | 0.0774 | 0.0015 | 2.064  | 0.0420 | 0.1935 | 0.0025 | 1132 | 39 | 1137 | 14 | 1140 | 14 | 99.3  | 1132       | 39 |
| LT20A-018 | 41  | 41  | 0.99 | 0.1663 | 0.0035 | 10.730 | 0.2330 | 0.4681 | 0.0066 | 2521 | 35 | 2500 | 20 | 2475 | 29 | 101.9 | 2521       | 35 |
| LT20A-019 | 22  | 42  | 0.53 | 0.1108 | 0.0028 | 4.969  | 0.1260 | 0.3255 | 0.0047 | 1812 | 45 | 1814 | 21 | 1817 | 23 | 99.7  | 1812       | 45 |
| LT20A-020 | 161 | 249 | 0.65 | 0.0721 | 0.0015 | 1.717  | 0.0360 | 0.1729 | 0.0023 | 988  | 41 | 1015 | 14 | 1028 | 12 | 96.1  | 988        | 41 |
| LT20A-021 | 34  | 49  | 0.70 | 0.1204 | 0.0028 | 5.964  | 0.1390 | 0.3594 | 0.0051 | 1962 | 40 | 1971 | 20 | 1979 | 24 | 99.1  | 1962       | 40 |
| LT20A-022 | 34  | 167 | 0.20 | 0.1636 | 0.0029 | 11.091 | 0.2090 | 0.4920 | 0.0064 | 2493 | 30 | 2531 | 18 | 2579 | 28 | 96.7  | 2493       | 30 |
| LT20A-023 | 32  | 46  | 0.69 | 0.0613 | 0.0028 | 0.9040 | 0.0410 | 0.1070 | 0.0018 | 648  | 97 | 654  | 22 | 655  | 10 | 99.8  | 655        | 10 |
| LT20A-024 | 105 | 64  | 1.65 | 0.1472 | 0.0031 | 7.947  | 0.1710 | 0.3918 | 0.0054 | 2313 | 35 | 2225 | 19 | 2131 | 25 | 108.5 | 2313       | 35 |
| LT20A-025 | 57  | 79  | 0.73 | 0.1716 | 0.0033 | 11.782 | 0.2370 | 0.4982 | 0.0067 | 2573 | 32 | 2587 | 19 | 2606 | 29 | 98.7  | 2573       | 32 |
| LT20A-026 | 47  | 128 | 0.37 | 0.0968 | 0.0020 | 3.941  | 0.0850 | 0.2954 | 0.0039 | 1563 | 38 | 1622 | 17 | 1669 | 20 | 93.6  | 1563       | 38 |
| LT20A-027 | 199 | 102 | 1.95 | 0.1714 | 0.0032 | 11.810 | 0.2320 | 0.5001 | 0.0066 | 2571 | 31 | 2589 | 18 | 2614 | 28 | 98.4  | 2571       | 31 |
| LT20A-028 | 45  | 43  | 1.04 | 0.0675 | 0.0027 | 1.285  | 0.0510 | 0.1381 | 0.0022 | 853  | 82 | 839  | 23 | 834  | 13 | 100.6 | 834        | 13 |
| LT20A-029 | 141 | 161 | 0.88 | 0.0730 | 0.0017 | 1.674  | 0.0400 | 0.1666 | 0.0022 | 1013 | 47 | 999  | 15 | 993  | 12 | 100.6 | 993        | 12 |
| LT20A-030 | 365 | 316 | 1.16 | 0.0796 | 0.0016 | 2.186  | 0.0460 | 0.1993 | 0.0026 | 1187 | 39 | 1177 | 15 | 1172 | 14 | 101.3 | 1187       | 39 |
| LT20A-031 | 134 | 165 | 0.81 | 0.1113 | 0.0022 | 5.112  | 0.1050 | 0.3333 | 0.0044 | 1821 | 35 | 1838 | 17 | 1854 | 21 | 98.2  | 1821       | 35 |
| LT20A-032 | 129 | 351 | 0.37 | 0.1601 | 0.0029 | 9.935  | 0.1910 | 0.4504 | 0.0058 | 2456 | 30 | 2429 | 18 | 2397 | 26 | 102.5 | 2456       | 30 |
| LT20A-033 | 161 | 126 | 1.28 | 0.1649 | 0.0032 | 10.805 | 0.2170 | 0.4755 | 0.0063 | 2506 | 32 | 2506 | 19 | 2508 | 28 | 99.9  | 2506       | 32 |
| LT20A-034 | 233 | 304 | 0.76 | 0.0574 | 0.0016 | 0.5700 | 0.0160 | 0.0721 | 0.0010 | 506  | 59 | 458  | 10 | 449  | 6  | 102.0 | 449        | 6  |
| LT20A-035 | 95  | 113 | 0.84 | 0.0567 | 0.0020 | 0.6710 | 0.0240 | 0.0858 | 0.0013 | 481  | 76 | 521  | 14 | 531  | 7  | 98.1  | 531        | 7  |
| LT20A-036 | 115 | 166 | 0.69 | 0.0688 | 0.0018 | 1.238  | 0.0320 | 0.1306 | 0.0018 | 892  | 52 | 818  | 15 | 791  | 10 | 103.4 | 791        | 10 |
| LT20A-037 | 13  | 163 | 0.08 | 0.1591 | 0.0031 | 10.252 | 0.2090 | 0.4676 | 0.0062 | 2446 | 32 | 2458 | 19 | 2473 | 27 | 98.9  | 2446       | 32 |
| LT20A-038 | 75  | 465 | 0.16 | 0.0718 | 0.0015 | 1.713  | 0.0360 | 0.1730 | 0.0023 | 981  | 41 | 1013 | 14 | 1028 | 12 | 95.4  | 981        | 41 |
| LT20A-039 | 47  | 61  | 0.77 | 0.0667 | 0.0023 | 1.341  | 0.0470 | 0.1459 | 0.0022 | 829  | 71 | 864  | 20 | 878  | 12 | 98.4  | 878        | 12 |
| LT20A-040 | 14  | 19  | 0.76 | 0.1104 | 0.0038 | 4.862  | 0.1650 | 0.3195 | 0.0054 | 1806 | 60 | 1796 | 29 | 1787 | 26 | 101.1 | 1806       | 60 |
| LT20A-041 | 137 | 159 | 0.86 | 0.0798 | 0.0019 | 2.302  | 0.0550 | 0.2093 | 0.0028 | 1192 | 45 | 1213 | 17 | 1225 | 15 | 97.3  | 1192       | 45 |
| LT20A-042 | 362 | 604 | 0.60 | 0.0727 | 0.0015 | 1.673  | 0.0360 | 0.1671 | 0.0022 | 1004 | 41 | 998  | 14 | 996  | 12 | 100.2 | 996        | 12 |
| LT20A-043 | 193 | 239 | 0.81 | 0.0568 | 0.0017 | 0.5990 | 0.0180 | 0.0766 | 0.0011 | 483  | 63 | 477  | 11 | 476  | 6  | 100.2 | 476        | 6  |
| LT20A-044 | 44  | 62  | 0.70 | 0.1144 | 0.0028 | 5.098  | 0.1250 | 0.3334 | 0.0046 | 1870 | 43 | 1836 | 21 | 1806 | 22 | 103.5 | 1870       | 43 |
| LT20A-045 | 68  | 116 | 0.58 | 0.1132 | 0.0025 | 5.177  | 0.1190 | 0.3319 | 0.0045 | 1851 | 39 | 1849 | 20 | 1848 | 22 | 100.2 | 1851       | 39 |
| LT20A-046 | 103 | 175 | 0.59 | 0.1092 | 0.0024 | 4.853  | 0.1080 | 0.3225 | 0.0043 | 1786 | 38 | 1794 | 19 | 1802 | 21 | 99.1  | 1786       | 38 |
| LT20A-047 | 34  | 44  | 0.77 | 0.1138 | 0.0031 | 5.413  | 0.1490 | 0.3450 | 0.0052 | 1862 | 48 | 1887 | 24 | 1911 | 25 | 97.4  | 1862       | 48 |
| LT20A-048 | 195 | 320 | 0.61 | 0.0573 | 0.0016 | 0.5880 | 0.0160 | 0.0744 | 0.0010 | 504  | 59 | 469  | 10 | 462  | 6  | 101.5 | 462        | 6  |
| LT20A-049 | 115 | 127 | 0.91 | 0.1131 | 0.0025 | 5.197  | 0.1200 | 0.3335 | 0.0046 | 1849 | 40 | 1852 | 20 | 1855 | 22 | 99.7  | 1849       | 40 |
| LT20A-050 | 193 | 398 | 0.49 | 0.1915 | 0.0039 | 13.987 | 0.2980 | 0.5299 | 0.0070 | 2755 | 33 | 2749 | 20 | 2741 | 30 | 100.5 | 2755       | 33 |
| LT20A-051 | 44  | 157 | 0.28 | 0.0822 | 0.0020 | 2.346  | 0.0590 | 0.2071 | 0.0029 | 1250 | 47 | 1226 | 18 | 1214 | 15 | 103.0 | 1250       | 47 |
| LT20A-052 | 63  | 60  | 1.04 | 0.1251 | 0.0031 | 6.453  | 0.1620 | 0.3744 | 0.0054 | 2030 | 42 | 2040 | 22 | 2050 | 25 | 99.0  | 2030       | 42 |
| LT20A-053 | 45  | 130 | 0.34 | 0.1722 | 0.0037 | 11.301 | 0.2540 | 0.4762 | 0.0065 | 2579 | 35 | 2548 | 21 | 2511 | 28 | 102.7 | 2579       | 35 |
| LT20A-054 | 77  | 157 | 0.49 | 0.1704 | 0.0037 | 10.476 | 0.2350 | 0.4461 | 0.0061 | 2561 | 36 | 2478 | 21 | 2378 | 27 | 107.7 | 2561       | 36 |
| LT20A-055 | 10  | 25  | 0.40 | 0.0880 | 0.0041 | 1.653  | 0.0760 | 0.1363 | 0.0025 | 1382 | 87 | 991  | 29 | 824  | 14 | 120.3 | Discordant |    |
| LT20A-056 | 58  | 73  | 0.80 | 0.0709 | 0.0024 | 1.331  | 0.0460 | 0.1363 | 0.0021 | 953  | 67 | 859  | 20 | 824  | 12 | 104.2 | 824        | 12 |
| LT20A-057 | 38  | 49  | 0.79 | 0.0670 | 0.0027 | 1.166  | 0.0470 | 0.1262 | 0.0021 | 838  | 82 | 785  | 22 | 766  | 12 | 102.5 | 766        | 12 |
| LT20A-058 | 25  | 26  | 0.99 | 0.1108 | 0.0035 | 5.046  | 0.1620 | 0.3303 | 0.0053 | 1813 | 55 | 1827 | 27 | 1840 | 26 | 98.5  | 1813       | 55 |
| LT20A-059 | 50  | 35  | 1.40 | 0.1655 | 0.0042 | 11.370 | 0.2980 | 0.4985 | 0.0075 | 2513 | 41 | 2554 | 24 | 2607 | 32 | 96.4  | 2513       | 41 |
| LT20A-060 | 225 | 94  | 2.39 | 0.1691 | 0.0039 | 11.329 | 0.2710 | 0.4862 | 0.0068 | 2548 | 37 | 2551 | 22 | 2554 | 30 | 99.8  | 2548       | 37 |
| LT20A-061 | 116 | 37  | 3.15 | 0.1679 | 0.0043 | 10.726 | 0.2830 | 0.4634 | 0.0070 | 2537 | 41 | 2500 | 25 | 2455 | 31 | 103.3 | 2537       | 41 |

|           |     |     |      |        |        |        |        |        |        |      |     |      |    |      |    |       |            |    |
|-----------|-----|-----|------|--------|--------|--------|--------|--------|--------|------|-----|------|----|------|----|-------|------------|----|
| LT20A-062 | 63  | 182 | 0.34 | 0.0590 | 0.0022 | 0.6070 | 0.0260 | 0.0747 | 0.0012 | 566  | 77  | 482  | 16 | 465  | 7  | 103.7 | 465        | 7  |
| LT20A-063 | 52  | 299 | 0.17 | 0.0592 | 0.0017 | 0.6050 | 0.0180 | 0.0741 | 0.0011 | 575  | 61  | 480  | 11 | 461  | 6  | 104.1 | 461        | 6  |
| LT20A-064 | 154 | 335 | 0.46 | 0.0698 | 0.0018 | 1.239  | 0.0330 | 0.1288 | 0.0018 | 922  | 51  | 818  | 15 | 781  | 10 | 104.7 | 781        | 10 |
| LT20A-065 | 92  | 295 | 0.31 | 0.0702 | 0.0018 | 1.526  | 0.0400 | 0.1577 | 0.0022 | 934  | 50  | 941  | 16 | 944  | 12 | 99.7  | 944        | 12 |
| LT20A-066 | 38  | 58  | 0.66 | 0.0730 | 0.0027 | 1.383  | 0.0520 | 0.1375 | 0.0022 | 1014 | 73  | 882  | 22 | 830  | 12 | 106.3 | 830        | 12 |
| LT20A-067 | 171 | 388 | 0.44 | 0.0693 | 0.0018 | 1.321  | 0.0350 | 0.1383 | 0.0019 | 909  | 50  | 855  | 15 | 835  | 11 | 102.4 | 835        | 11 |
| LT20A-068 | 234 | 403 | 0.58 | 0.0682 | 0.0018 | 1.295  | 0.0340 | 0.1378 | 0.0019 | 874  | 51  | 843  | 15 | 832  | 11 | 101.3 | 832        | 11 |
| LT20A-069 | 48  | 82  | 0.58 | 0.0689 | 0.0023 | 1.447  | 0.0490 | 0.1524 | 0.0023 | 895  | 66  | 909  | 20 | 914  | 13 | 99.5  | 914        | 13 |
| LT20A-070 | 155 | 279 | 0.55 | 0.0677 | 0.0019 | 1.221  | 0.0350 | 0.1308 | 0.0019 | 860  | 56  | 810  | 16 | 793  | 11 | 102.1 | 793        | 11 |
| LT20A-071 | 191 | 52  | 3.66 | 0.0656 | 0.0027 | 1.259  | 0.0520 | 0.1393 | 0.0023 | 793  | 82  | 827  | 23 | 841  | 13 | 98.3  | 841        | 13 |
| LT20A-072 | 103 | 644 | 0.16 | 0.3020 | 0.0072 | 29.141 | 0.7180 | 0.7000 | 0.0097 | 3481 | 35  | 3458 | 24 | 3421 | 37 | 101.8 | 3481       | 35 |
| LT20A-073 | 32  | 104 | 0.30 | 0.3353 | 0.0082 | 37.250 | 0.9380 | 0.8059 | 0.0115 | 3642 | 36  | 3700 | 25 | 3810 | 41 | 95.6  | 3642       | 36 |
| LT20A-074 | 65  | 90  | 0.73 | 0.3080 | 0.0076 | 30.614 | 0.7790 | 0.7210 | 0.0103 | 3511 | 36  | 3507 | 25 | 3500 | 39 | 100.3 | 3511       | 36 |
| LT20A-075 | 72  | 137 | 0.52 | 0.0577 | 0.0028 | 0.5650 | 0.0320 | 0.0710 | 0.0012 | 517  | 103 | 454  | 21 | 442  | 7  | 102.7 | 442        | 7  |
| LT20A-076 | 20  | 35  | 0.56 | 0.1684 | 0.0047 | 11.372 | 0.3250 | 0.4899 | 0.0076 | 2542 | 45  | 2554 | 27 | 2570 | 33 | 98.9  | 2542       | 45 |
| LT20A-077 | 68  | 268 | 0.25 | 0.1775 | 0.0042 | 10.866 | 0.2800 | 0.4441 | 0.0064 | 2629 | 38  | 2512 | 24 | 2369 | 28 | 111.0 | Discordant |    |
| LT20A-078 | 119 | 170 | 0.70 | 0.0750 | 0.0022 | 1.812  | 0.0530 | 0.1753 | 0.0026 | 1067 | 56  | 1050 | 19 | 1041 | 14 | 102.5 | 1067       | 56 |
| LT20A-079 | 63  | 242 | 0.26 | 0.1672 | 0.0043 | 10.885 | 0.2860 | 0.4722 | 0.0067 | 2530 | 41  | 2513 | 24 | 2493 | 29 | 101.5 | 2530       | 41 |
| LT20A-080 | 344 | 231 | 1.48 | 0.0785 | 0.0022 | 1.978  | 0.0560 | 0.1828 | 0.0026 | 1160 | 53  | 1108 | 19 | 1082 | 14 | 107.2 | 1160       | 53 |
| LT20A-081 | 47  | 540 | 0.09 | 0.1008 | 0.0026 | 3.947  | 0.1050 | 0.2841 | 0.0040 | 1639 | 46  | 1623 | 22 | 1612 | 20 | 101.7 | 1639       | 46 |
| LT20A-082 | 83  | 71  | 1.16 | 0.0990 | 0.0030 | 3.885  | 0.1180 | 0.2846 | 0.0043 | 1606 | 54  | 1611 | 25 | 1614 | 22 | 99.5  | 1606       | 54 |
| LT20A-083 | 94  | 59  | 1.61 | 0.0683 | 0.0027 | 1.267  | 0.0510 | 0.1347 | 0.0022 | 876  | 80  | 831  | 23 | 814  | 13 | 102.1 | 814        | 13 |
| LT20A-084 | 145 | 198 | 0.73 | 0.1254 | 0.0034 | 6.572  | 0.1810 | 0.3803 | 0.0055 | 2034 | 46  | 2056 | 24 | 2078 | 26 | 97.9  | 2034       | 46 |
| LT20A-085 | 52  | 33  | 1.58 | 0.1204 | 0.0039 | 6.143  | 0.1990 | 0.3700 | 0.0060 | 1963 | 55  | 1996 | 28 | 2029 | 28 | 96.7  | 1963       | 55 |
| LT20A-086 | 97  | 143 | 0.68 | 0.0999 | 0.0029 | 3.971  | 0.1160 | 0.2884 | 0.0043 | 1622 | 51  | 1628 | 24 | 1634 | 21 | 99.3  | 1622       | 51 |
| LT20A-087 | 234 | 214 | 1.09 | 0.1720 | 0.0047 | 11.634 | 0.3240 | 0.4907 | 0.0071 | 2577 | 44  | 2575 | 26 | 2574 | 31 | 100.1 | 2577       | 44 |
| LT20A-088 | 89  | 95  | 0.94 | 0.0675 | 0.0025 | 1.302  | 0.0480 | 0.1399 | 0.0022 | 854  | 74  | 847  | 21 | 844  | 13 | 100.4 | 844        | 13 |
| LT20A-089 | 115 | 119 | 0.97 | 0.0671 | 0.0023 | 1.259  | 0.0440 | 0.1361 | 0.0021 | 842  | 69  | 828  | 20 | 822  | 12 | 100.7 | 822        | 12 |
| LT20A-090 | 60  | 66  | 0.91 | 0.1173 | 0.0035 | 5.950  | 0.1830 | 0.3679 | 0.0056 | 1915 | 52  | 1969 | 27 | 2019 | 27 | 94.8  | 1915       | 52 |
| LT20A-091 | 118 | 148 | 0.80 | 0.0743 | 0.0023 | 1.971  | 0.0630 | 0.1923 | 0.0029 | 1050 | 61  | 1105 | 21 | 1134 | 16 | 92.6  | 1050       | 61 |
| LT20A-092 | 81  | 135 | 0.60 | 0.0716 | 0.0024 | 1.543  | 0.0510 | 0.1563 | 0.0024 | 975  | 65  | 948  | 21 | 936  | 13 | 101.3 | 936        | 13 |
| LT20A-093 | 184 | 346 | 0.53 | 0.1786 | 0.0050 | 12.072 | 0.3450 | 0.4903 | 0.0071 | 2640 | 44  | 2610 | 27 | 2572 | 31 | 102.6 | 2640       | 44 |
| LT20A-094 | 402 | 622 | 0.65 | 0.1685 | 0.0047 | 11.355 | 0.3250 | 0.4888 | 0.0071 | 2543 | 45  | 2553 | 27 | 2565 | 31 | 99.1  | 2543       | 45 |

Sample 91-Sh-5, sandstone, Late Silurian Kalpintage Formation in Aksu area of northwestern Tarim, (Carroll et al., 2013, International Geology Review)

|          |     |      |        |        |        |        |        |        |      |     |      |    |      |    |       |            |    |
|----------|-----|------|--------|--------|--------|--------|--------|--------|------|-----|------|----|------|----|-------|------------|----|
| 91SH5-1  | 185 | 0.56 | 0.0646 | 0.0021 | 1.202  | 0.0433 | 0.1348 | 0.0022 | 763  | 67  | 801  | 20 | 815  | 12 | 98.3  | 815        | 12 |
| 91SH5-2  | 137 | 0.22 | 0.1605 | 0.0010 | 10.679 | 0.2243 | 0.4826 | 0.0097 | 2461 | 10  | 2496 | 19 | 2539 | 41 | 96.9  | 2461       | 10 |
| 91SH5-3  | 138 | 0.83 | 0.0518 | 0.0037 | 0.5265 | 0.0390 | 0.0737 | 0.0015 | 279  | 164 | 430  | 26 | 458  | 9  | 93.8  | 458        | 9  |
| 91SH5-5  | 325 | 0.71 | 0.0694 | 0.0014 | 1.368  | 0.0301 | 0.1431 | 0.0011 | 910  | 41  | 875  | 13 | 862  | 7  | 101.6 | 862        | 7  |
| 91SH5-6  | 172 | 0.53 | 0.0558 | 0.0027 | 0.5399 | 0.0292 | 0.0702 | 0.0018 | 443  | 107 | 438  | 19 | 438  | 11 | 100.2 | 438        | 11 |
| 91SH5-7  | 55  | 1.67 | 0.0534 | 0.0097 | 0.5917 | 0.1083 | 0.0804 | 0.0010 | 344  | 415 | 472  | 69 | 499  | 6  | 94.6  | 499        | 6  |
| 91SH5-8  | 111 | 1.11 | 0.0709 | 0.0018 | 1.687  | 0.0455 | 0.1725 | 0.0016 | 954  | 52  | 1003 | 17 | 1026 | 8  | 93.0  | 954        | 52 |
| 91SH5-9  | 424 | 0.08 | 0.0969 | 0.0009 | 3.558  | 0.0640 | 0.2664 | 0.0040 | 1565 | 17  | 1540 | 14 | 1523 | 21 | 102.8 | 1565       | 17 |
| 91SH5-10 | 220 | 0.77 | 0.0674 | 0.0008 | 1.322  | 0.0198 | 0.1421 | 0.0011 | 851  | 25  | 855  | 9  | 857  | 7  | 99.8  | 857        | 7  |
| 91SH5-11 | 80  | 0.53 | 0.0599 | 0.0057 | 0.8184 | 0.0786 | 0.0990 | 0.0017 | 601  | 205 | 607  | 44 | 609  | 10 | 99.7  | 609        | 10 |
| 91SH5-12 | 114 | 1.00 | 0.0639 | 0.0020 | 1.120  | 0.0381 | 0.1271 | 0.0013 | 739  | 68  | 763  | 18 | 771  | 7  | 98.9  | 771        | 7  |
| 91SH5-13 | 171 | 0.43 | 0.0652 | 0.0018 | 1.203  | 0.0385 | 0.1338 | 0.0020 | 781  | 59  | 802  | 18 | 810  | 11 | 99.1  | 810        | 11 |
| 91SH5-14 | 408 | 0.29 | 0.1066 | 0.0004 | 4.123  | 0.0618 | 0.2805 | 0.0039 | 1742 | 7   | 1659 | 12 | 1594 | 20 | 109.3 | 1742       | 7  |
| 91SH5-15 | 64  | 0.59 | 0.0926 | 0.0020 | 3.430  | 0.0926 | 0.2687 | 0.0043 | 1480 | 42  | 1511 | 21 | 1534 | 21 | 96.4  | 1480       | 42 |
| 91SH5-16 | 402 | 0.42 | 0.0673 | 0.0013 | 1.292  | 0.0271 | 0.1393 | 0.0011 | 847  | 42  | 842  | 12 | 841  | 6  | 100.2 | 841        | 6  |
| 91SH5-17 | 294 | 0.63 | 0.0758 | 0.0010 | 1.983  | 0.0337 | 0.1897 | 0.0019 | 1091 | 26  | 1110 | 11 | 1120 | 11 | 97.4  | 1091       | 26 |
| 91SH5-19 | 64  | 1.43 | 0.1092 | 0.0012 | 4.680  | 0.1030 | 0.3108 | 0.0059 | 1786 | 20  | 1764 | 18 | 1745 | 29 | 102.4 | 1786       | 20 |
| 91SH5-21 | 176 | 1.25 | 0.0933 | 0.0015 | 2.741  | 0.0603 | 0.2131 | 0.0032 | 1494 | 30  | 1340 | 16 | 1245 | 17 | 119.9 | Discordant |    |
| 91SH5-22 | 228 | 0.43 | 0.0798 | 0.0005 | 2.299  | 0.0575 | 0.2089 | 0.0050 | 1193 | 11  | 1212 | 18 | 1223 | 27 | 97.5  | 1193       | 11 |
| 91SH5-23 | 136 | 1.67 | 0.1215 | 0.0030 | 5.898  | 0.1828 | 0.3521 | 0.0063 | 1978 | 45  | 1961 | 27 | 1945 | 30 | 101.7 | 1978       | 45 |
| 91SH5-24 | 58  | 1.11 | 0.0607 | 0.0045 | 1.079  | 0.0831 | 0.1290 | 0.0023 | 627  | 161 | 743  | 40 | 782  | 13 | 95.0  | 782        | 13 |
| 91SH5-25 | 242 | 0.59 | 0.1658 | 0.0012 | 9.383  | 0.1783 | 0.4104 | 0.0074 | 2516 | 12  | 2376 | 18 | 2217 | 33 | 113.5 | Discordant |    |
| 91SH5-26 | 25  | 0.91 | 0.1108 | 0.0034 | 5.031  | 0.1710 | 0.3294 | 0.0046 | 1812 | 56  | 1825 | 28 | 1836 | 22 | 98.7  | 1812       | 56 |
| 91SH5-27 | 89  | 0.25 | 0.1116 | 0.0011 | 5.130  | 0.1334 | 0.3333 | 0.0080 | 1826 | 18  | 1841 | 22 | 1854 | 38 | 98.5  | 1826       | 18 |
| 91SH5-28 | 163 | 0.83 | 0.0657 | 0.0038 | 1.148  | 0.0689 | 0.1267 | 0.0023 | 796  | 122 | 776  | 33 | 769  | 13 | 100.9 | 769        | 13 |
| 91SH5-29 | 48  | 0.12 | 0.1644 | 0.0016 | 10.828 | 0.1624 | 0.4777 | 0.0053 | 2501 | 17  | 2509 | 14 | 2517 | 22 | 99.4  | 2501       | 17 |
| 91SH5-30 | 127 | 1.11 | 0.0808 | 0.0008 | 2.350  | 0.0564 | 0.2109 | 0.0046 | 1217 | 20  | 1227 | 17 | 1233 | 24 | 98.7  | 1217       | 20 |
| 91SH5-31 | 29  | 1.25 | 0.1120 | 0.0045 | 5.085  | 0.2237 | 0.3294 | 0.0056 | 1831 | 73  | 1834 | 37 | 1836 | 27 | 99.8  | 1831       | 73 |
| 91SH5-32 | 207 | 0.40 | 0.0657 | 0.0018 | 1.250  | 0.0425 | 0.1379 | 0.0026 | 798  | 58  | 823  | 19 | 833  | 15 | 98.9  | 833        | 15 |
| 91SH5-33 | 96  | 0.63 | 0.1122 | 0.0015 | 5.337  | 0.1548 | 0.3449 | 0.0090 | 1836 | 24  | 1875 | 25 | 1910 | 43 | 96.1  | 1836       | 24 |
| 91SH5-34 | 208 | 2.00 | 0.0579 | 0.0044 | 0.5371 | 0.0424 | 0.0673 | 0.0015 | 525  | 167 | 437  | 28 | 420  | 9  | 104.0 | 420        | 9  |
| 91SH5-35 | 215 | 1.00 | 0.0580 | 0.0015 | 0.7350 | 0.0235 | 0.0919 | 0.0017 | 530  | 57  | 560  | 14 | 567  | 10 | 98.7  | 567        | 10 |
| 91SH5-36 | 551 | 0.50 | 0.1258 | 0.0004 | 4.925  | 0.1280 | 0.2838 | 0.0071 | 2041 | 6   | 1807 | 22 | 1611 | 36 | 126.7 | Discordant |    |
| 91SH5-37 | 213 | 0.67 | 0.1140 | 0.0006 | 5.397  | 0.1241 | 0.3435 | 0.0076 | 1863 | 9   | 1884 | 20 | 1903 | 37 | 97.9  | 1863       | 9  |
| 91SH5-38 | 262 | 0.56 | 0.0700 | 0.0008 | 1.534  | 0.0276 | 0.1590 | 0.0022 | 928  | 23  | 944  | 11 | 951  | 12 | 99.3  | 951        | 12 |
| 91SH5-39 | 198 | 0.77 | 0.0983 | 0.0013 | 3.757  | 0.0714 | 0.2771 | 0.0036 | 1593 | 24  | 1584 | 15 | 1577 | 19 | 101.0 | 1593       | 24 |
| 91SH5-40 | 93  | 0.71 | 0.0553 | 0.0097 | 0.5447 | 0.0964 | 0.0714 | 0.0015 | 425  | 394 | 442  | 63 | 445  | 9  | 99.3  | 445        | 9  |
| 91SH5-41 | 54  | 1.00 | 0.0768 | 0.0035 | 2.107  | 0.1138 | 0.1990 | 0.0054 | 1116 | 93  | 1151 | 37 | 1170 | 29 | 95.4  | 1116       | 93 |
| 91SH5-42 | 78  | 0.91 | 0.0646 | 0.0101 | 0.6625 | 0.1034 | 0.0744 | 0.0006 | 761  | 331 | 516  | 63 | 463  | 3  | 111.6 | Discordant |    |
| 91SH5-43 | 36  | 0.83 | 0.1109 | 0.0022 | 4.274  | 0.0855 | 0.2795 | 0.0014 | 1814 | 35  | 1688 | 17 | 1589 | 7  | 114.2 | Discordant |    |
| 91SH5-44 | 268 | 0.29 | 0.0575 | 0.0012 | 0.5946 | 0.0137 | 0.0750 | 0.0006 | 510  | 47  | 474  | 9  | 466  | 4  | 101.6 | 466        | 4  |
| 91SH5-45 | 398 | 0.23 | 0.0726 | 0.0008 | 1.549  | 0.0387 | 0.1547 | 0.0034 | 1004 | 23  | 950  | 15 | 927  | 19 | 102.5 | 927        | 19 |
| 91SH5-46 | 34  | 1.11 | 0.1095 | 0.0049 | 5.149  | 0.2935 | 0.3410 | 0.0116 | 1792 | 82  | 1844 | 48 | 1891 | 56 | 94.7  | 1792       | 82 |
| 91SH5-47 | 296 | 0.67 | 0.0665 | 0.0013 | 1.189  | 0.0285 | 0.1297 | 0.0017 | 821  | 42  | 795  | 13 | 786  | 10 | 101.2 | 786        | 10 |
| 91SH5-48 | 273 | 0.23 | 0.0828 | 0.0011 | 2.509  | 0.0502 | 0.2198 | 0.0035 | 1264 | 25  | 1275 | 15 | 1281 | 18 | 98.7  | 1264       | 25 |
| 91SH5-49 | 98  | 0.53 | 0.0503 | 0.0073 | 0.4991 | 0.0729 | 0.0720 | 0.0008 | 207  | 339 | 411  | 49 | 448  | 5  | 91.7  | 448        | 5  |
| 91SH5-50 | 233 | 0.67 | 0.0583 | 0.0008 | 0.7135 | 0.0157 | 0.0888 | 0.0015 | 541  | 31  | 547  | 9  | 548  | 9  | 99.7  | 548        | 9  |
| 91SH5-51 | 201 | 0.29 | 0.0816 | 0.0014 | 2.380  | 0.0619 | 0.2114 | 0.0040 | 1237 | 33  | 1237 | 18 | 1237 | 22 | 100.1 | 1237       | 33 |
| 91SH5-52 | 109 | 0.77 | 0.0667 | 0.0022 | 1.168  | 0.0456 | 0.1271 | 0.0027 | 827  | 68  | 786  | 21 | 771  | 15 | 101.9 | 771        | 15 |
| 91SH5-53 | 330 | 0.67 | 0.0794 | 0.0006 | 2.190  | 0.0241 | 0.2001 | 0.0016 | 1182 | 15  | 1178 | 8  | 1176 | 9  | 100.5 | 1182       | 15 |
| 91SH5-54 | 304 | 0.91 | 0.0665 | 0.0013 | 1.009  | 0.0242 | 0.1101 | 0.0014 | 822  | 43  | 708  | 12 | 673  | 8  | 105.2 | 673        | 8  |
| 91SH5-55 | 125 | 0.56 | 0.1090 | 0.0011 | 4.986  | 0.1695 | 0.3316 | 0.0106 | 1784 | 18  | 1817 | 29 | 1846 | 52 | 96.6  | 1784       | 18 |
| 91SH5-56 | 90  | 0.77 | 0.0613 | 0.0026 | 1.043  | 0.0459 | 0.1233 | 0.0016 | 652  | 91  | 725  | 23 | 749  | 9  | 96.8  | 749        | 9  |
| 91SH5-57 | 81  | 0.43 | 0.1761 | 0.0007 | 11.913 | 0.3336 | 0.4907 | 0.0137 | 2616 | 7   | 2598 | 26 | 2574 | 59 | 101.7 | 2616       | 7  |
| 91SH5-59 | 109 | 1.25 | 0.1209 | 0.0011 | 6.154  | 0.1539 | 0.3692 | 0.0089 | 1970 | 16  | 1988 | 22 | 2026 | 41 | 97.2  | 1970       | 16 |
| 91SH5-60 | 223 | 0.20 | 0.1645 | 0.0005 | 10.160 | 0.3962 | 0.4479 | 0.0175 | 2503 | 5   | 2449 | 36 | 2386 | 77 | 104.9 | 2503       | 5  |
| 91SH5-61 | 494 | 0.48 | 0.1540 | 0.0009 | 8.327  | 0.1582 | 0.3923 | 0.0071 | 2390 | 10  | 2267 | 17 | 2133 | 33 | 112.0 | Discordant |    |
| 91SH5-62 | 55  | 3.33 | 0.0719 | 0.0047 | 1.355  | 0.0908 | 0.1366 | 0.0019 | 984  | 133 | 870  | 39 | 825  | 11 | 105.4 | 825        | 11 |
| 91SH5-64 | 84  | 0.42 | 0.0732 | 0.0037 | 1.615  | 0.0840 | 0.1600 | 0.0022 | 1020 | 102 | 976  | 33 | 957  | 12 | 102.0 | 957        | 12 |
| 91SH5-65 | 75  | 1.11 | 0.0614 | 0.0061 | 1.046  | 0.1067 | 0.1236 | 0.0025 | 654  | 214 | 727  | 53 | 751  | 14 | 96.8  | 751        | 14 |
| 91SH5-66 | 83  | 0.71 | 0.1117 | 0.0017 | 5.439  | 0.1197 | 0.3533 | 0.0057 | 1826 | 27  | 1891 | 19 | 1951 | 28 | 93.6  | 1826       | 27 |
| 91SH5-67 | 197 | 0.83 | 0.1118 | 0.0008 | 5.094  | 0.1375 | 0.3303 | 0.0086 | 1829 | 12  | 1835 | 23 | 1840 | 41 | 99.4  | 1829       | 12 |
| 91SH5-68 | 65  | 1.00 | 0.1115 | 0.0020 | 5.046  | 0.1716 | 0.3281 | 0.0095 | 1825 | 32  | 1827 | 29 | 1829 | 46 | 99.7  | 1825       | 32 |
| 91SH5-69 | 108 | 0.83 | 0.1656 | 0.0008 | 11.184 | 0.1566 | 0.4898 | 0.0064 | 2514 | 8   | 2539 | 13 | 2570 | 28 | 97.8  | 2514       | 8  |
| 91SH5-70 | 118 | 0.53 | 0.0837 | 0.0024 | 2.564  | 0.0923 | 0.2222 | 0.0047 | 1286 | 56  | 1291 | 26 | 1294 | 25 | 99.4  | 1286       | 56 |
| 91SH5-72 | 206 | 0.71 | 0.0553 | 0.0019 | 0.5342 | 0.0214 | 0.0700 | 0.0013 | 426  | 78  | 435  | 14 | 436  | 8  | 99.6  | 436        | 8  |
| 91SH5-73 | 273 | 0.63 | 0.0911 | 0.0005 | 3.259  | 0.0554 | 0.2595 | 0.0042 | 1448 | 9   | 1471 | 13 | 1487 | 22 | 97.4  | 1448       | 9  |
| 91SH5-74 | 72  | 1.11 | 0.0670 | 0.0055 | 1.179  | 0.0991 | 0.1276 | 0.0024 | 839  | 171 | 791  | 46 | 774  | 14 | 102.2 | 774        | 14 |
| 91SH5-75 | 68  | 0.63 | 0.0655 | 0.0029 | 1.173  | 0.0528 | 0.1299 | 0.0010 | 791  | 94  | 788  | 25 | 787  | 6  | 100.1 | 787        | 6  |
| 91SH5-77 | 159 | 0.67 | 0.0807 | 0.0012 | 2.110  | 0.0549 | 0.1896 | 0.0040 | 1215 | 30  | 1152 | 18 | 1119 | 21 | 108.6 | 1215       | 30 |
| 91SH5-79 | 267 | 0.91 | 0.0788 | 0.0012 | 2.036  | 0.0591 | 0.1875 | 0.0045 | 1167 | 30  | 1128 | 20 | 1108 | 25 | 105.3 | 1167       | 30 |
| 91SH5-80 | 28  | 1.67 | 0.0624 | 0.0108 | 1.099  | 0.1945 | 0.1277 | 0.0043 | 689  | 372 | 753  | 94 | 775  | 25 | 97.2  | 775        | 25 |
| 91SH5-82 | 155 | 0.50 | 0.0567 | 0.0052 | 0.5664 | 0.0521 | 0.0725 | 0.0007 | 480  | 203 | 456  | 34 | 451  | 4  | 101.0 | 451        | 4  |
| 91SH5-83 | 128 | 1.67 | 0.0647 | 0.0017 | 1.152  | 0.0311 | 0.1    |        |      |     |      |    |      |    |       |            |    |

North Tarin

|                                                                                                                                                          |     |      |        |        |        |        |        |        |      |     |      |    |      |    |       |            |    |
|----------------------------------------------------------------------------------------------------------------------------------------------------------|-----|------|--------|--------|--------|--------|--------|--------|------|-----|------|----|------|----|-------|------------|----|
| 91SH5-95                                                                                                                                                 | 104 | 0.77 | 0.0544 | 0.0056 | 0.5166 | 0.0537 | 0.0688 | 0.0010 | 389  | 231 | 423  | 36 | 429  | 6  | 98.6  | 429        | 6  |
| 91SH5-97                                                                                                                                                 | 325 | 1.43 | 0.0590 | 0.0018 | 0.7749 | 0.0294 | 0.0953 | 0.0022 | 566  | 67  | 583  | 17 | 587  | 13 | 99.3  | 587        | 13 |
| 91SH5-98                                                                                                                                                 | 121 | 0.83 | 0.1140 | 0.0032 | 5.092  | 0.1833 | 0.3239 | 0.0071 | 1864 | 51  | 1835 | 30 | 1809 | 35 | 103.1 | 1864       | 51 |
| 91SH5-99                                                                                                                                                 | 55  | 1.43 | 0.1088 | 0.0032 | 4.752  | 0.1521 | 0.3166 | 0.0044 | 1780 | 52  | 1777 | 27 | 1773 | 21 | 100.4 | 1780       | 52 |
| 91SH5-100                                                                                                                                                | 243 | 0.59 | 0.0720 | 0.0014 | 1.594  | 0.0383 | 0.1605 | 0.0021 | 986  | 41  | 968  | 15 | 960  | 11 | 100.8 | 960        | 11 |
| Sample 91-Sh-6, sandstone, Late Silurian Tataaiertage Formation in Aksu area of northwestern Tarim, (Carroll et al., 2013, International Geology Review) |     |      |        |        |        |        |        |        |      |     |      |    |      |    |       |            |    |
| 91SH6-1                                                                                                                                                  | 88  | 1.11 | 0.0689 | 0.0030 | 1.341  | 0.0590 | 0.1410 | 0.0004 | 897  | 90  | 864  | 26 | 851  | 3  | 101.5 | 851        | 3  |
| 91SH6-2                                                                                                                                                  | 178 | 0.77 | 0.0672 | 0.0013 | 1.354  | 0.0325 | 0.1461 | 0.0020 | 843  | 40  | 869  | 14 | 879  | 12 | 98.9  | 879        | 12 |
| 91SH6-4                                                                                                                                                  | 145 | 1.43 | 0.1128 | 0.0009 | 5.253  | 0.0683 | 0.3376 | 0.0030 | 1846 | 15  | 1861 | 11 | 1875 | 15 | 98.4  | 1846       | 15 |
| 91SH6-5                                                                                                                                                  | 328 | 0.53 | 0.0668 | 0.0006 | 1.286  | 0.0167 | 0.1396 | 0.0014 | 831  | 18  | 839  | 7  | 843  | 8  | 99.6  | 843        | 8  |
| 91SH6-6                                                                                                                                                  | 179 | 0.59 | 0.0666 | 0.0011 | 1.272  | 0.0216 | 0.1386 | 0.0010 | 824  | 33  | 834  | 10 | 837  | 6  | 99.6  | 837        | 6  |
| 91SH6-7                                                                                                                                                  | 176 | 0.63 | 0.0538 | 0.0022 | 0.5318 | 0.0223 | 0.0717 | 0.0009 | 363  | 90  | 433  | 15 | 446  | 6  | 97.0  | 446        | 6  |
| 91SH6-8                                                                                                                                                  | 75  | 0.48 | 0.1378 | 0.0026 | 7.660  | 0.1455 | 0.4033 | 0.0020 | 2199 | 32  | 2192 | 17 | 2184 | 10 | 100.7 | 2199       | 32 |
| 91SH6-9                                                                                                                                                  | 253 | 0.42 | 0.1237 | 0.0036 | 5.525  | 0.1658 | 0.3238 | 0.0032 | 2011 | 51  | 1905 | 26 | 1808 | 16 | 111.2 | Discordant |    |
| 91SH6-10                                                                                                                                                 | 153 | 1.11 | 0.1547 | 0.0017 | 8.304  | 0.2491 | 0.3892 | 0.0109 | 2399 | 18  | 2265 | 28 | 2119 | 51 | 113.2 | Discordant |    |
| 91SH6-11                                                                                                                                                 | 156 | 0.67 | 0.1031 | 0.0012 | 4.298  | 0.0989 | 0.3023 | 0.0060 | 1681 | 22  | 1693 | 19 | 1703 | 30 | 98.7  | 1681       | 22 |
| 91SH6-13                                                                                                                                                 | 47  | 0.71 | 0.1131 | 0.0031 | 5.003  | 0.1351 | 0.3209 | 0.0013 | 1849 | 48  | 1820 | 23 | 1794 | 6  | 103.1 | 1849       | 48 |
| 91SH6-14                                                                                                                                                 | 109 | 0.63 | 0.1205 | 0.0014 | 5.985  | 0.0778 | 0.3603 | 0.0025 | 1964 | 21  | 1974 | 12 | 1984 | 11 | 99.0  | 1964       | 21 |
| 91SH6-15                                                                                                                                                 | 338 | 0.31 | 0.0799 | 0.0085 | 1.581  | 0.1786 | 0.1435 | 0.0056 | 1195 | 211 | 963  | 71 | 864  | 31 | 111.4 | Discordant |    |
| 91SH6-17                                                                                                                                                 | 403 | 1.25 | 0.0671 | 0.0008 | 1.055  | 0.0169 | 0.1140 | 0.0011 | 841  | 26  | 731  | 8  | 696  | 7  | 105.1 | 696        | 7  |
| 91SH6-19                                                                                                                                                 | 476 | 0.91 | 0.0568 | 0.0014 | 0.5875 | 0.0165 | 0.0750 | 0.0011 | 486  | 55  | 469  | 11 | 466  | 6  | 100.7 | 466        | 6  |
| 91SH6-21                                                                                                                                                 | 255 | 0.56 | 0.0918 | 0.0011 | 3.080  | 0.0832 | 0.2432 | 0.0061 | 1464 | 23  | 1428 | 21 | 1404 | 31 | 104.3 | 1464       | 23 |
| 91SH6-22                                                                                                                                                 | 237 | 0.56 | 0.1068 | 0.0014 | 3.752  | 0.0901 | 0.2549 | 0.0051 | 1745 | 23  | 1583 | 19 | 1464 | 26 | 119.2 | Discordant |    |
| 91SH6-23                                                                                                                                                 | 399 | 0.71 | 0.0669 | 0.0007 | 1.284  | 0.0347 | 0.1392 | 0.0036 | 835  | 21  | 839  | 16 | 840  | 20 | 99.8  | 840        | 20 |
| 91SH6-24                                                                                                                                                 | 251 | 0.37 | 0.0566 | 0.0023 | 0.5489 | 0.0225 | 0.0704 | 0.0006 | 475  | 90  | 444  | 15 | 438  | 4  | 101.3 | 438        | 4  |
| 91SH6-25                                                                                                                                                 | 350 | 0.29 | 0.0732 | 0.0020 | 1.607  | 0.0643 | 0.1593 | 0.0045 | 1019 | 56  | 973  | 25 | 953  | 25 | 102.1 | 953        | 25 |
| 91SH6-26                                                                                                                                                 | 108 | 1.67 | 0.0659 | 0.0019 | 1.135  | 0.0386 | 0.1249 | 0.0021 | 804  | 61  | 770  | 18 | 758  | 12 | 101.5 | 758        | 12 |
| 91SH6-27                                                                                                                                                 | 87  | 0.91 | 0.0987 | 0.0011 | 3.793  | 0.0796 | 0.2786 | 0.0050 | 1600 | 20  | 1591 | 17 | 1584 | 25 | 101.0 | 1600       | 20 |
| 91SH6-28                                                                                                                                                 | 207 | 0.83 | 0.0861 | 0.0013 | 2.739  | 0.0603 | 0.2307 | 0.0039 | 1341 | 28  | 1339 | 17 | 1338 | 20 | 100.2 | 1341       | 28 |
| 91SH6-29                                                                                                                                                 | 194 | 0.59 | 0.0554 | 0.0040 | 0.5441 | 0.0403 | 0.0712 | 0.0010 | 430  | 163 | 441  | 27 | 443  | 6  | 99.5  | 443        | 6  |
| 91SH6-30                                                                                                                                                 | 102 | 1.25 | 0.0731 | 0.0027 | 1.758  | 0.0686 | 0.1743 | 0.0016 | 1018 | 76  | 1030 | 25 | 1036 | 9  | 98.3  | 1018       | 76 |
| 91SH6-32                                                                                                                                                 | 271 | 0.77 | 0.0783 | 0.0007 | 1.990  | 0.0498 | 0.1843 | 0.0042 | 1154 | 18  | 1112 | 17 | 1091 | 23 | 105.8 | 1154       | 18 |
| 91SH6-33                                                                                                                                                 | 68  | 0.71 | 0.0536 | 0.0056 | 0.5359 | 0.0568 | 0.0725 | 0.0017 | 356  | 234 | 436  | 38 | 451  | 10 | 96.6  | 451        | 10 |
| 91SH6-34                                                                                                                                                 | 193 | 1.11 | 0.2141 | 0.0015 | 17.049 | 0.3921 | 0.5775 | 0.0127 | 2937 | 11  | 2938 | 22 | 2939 | 51 | 99.9  | 2937       | 11 |
| 91SH6-35                                                                                                                                                 | 153 | 1.25 | 0.0547 | 0.0049 | 0.5788 | 0.0521 | 0.0767 | 0.0009 | 401  | 201 | 464  | 34 | 476  | 5  | 97.3  | 476        | 5  |
| 91SH6-36                                                                                                                                                 | 32  | 0.31 | 0.1654 | 0.0025 | 11.015 | 0.2644 | 0.4828 | 0.0092 | 2512 | 26  | 2524 | 23 | 2540 | 40 | 98.9  | 2512       | 26 |
| 91SH6-37                                                                                                                                                 | 272 | 0.91 | 0.0586 | 0.0018 | 0.5868 | 0.0194 | 0.0726 | 0.0009 | 554  | 66  | 469  | 12 | 452  | 5  | 103.8 | 452        | 5  |
| 91SH6-38                                                                                                                                                 | 70  | 1.25 | 0.0691 | 0.0046 | 1.240  | 0.0843 | 0.1301 | 0.0020 | 902  | 136 | 819  | 38 | 788  | 12 | 103.9 | 788        | 12 |
| 91SH6-39                                                                                                                                                 | 81  | 1.11 | 0.0542 | 0.0055 | 0.5121 | 0.0533 | 0.0686 | 0.0013 | 378  | 230 | 420  | 36 | 427  | 8  | 98.2  | 427        | 8  |
| 91SH6-40                                                                                                                                                 | 288 | 0.45 | 0.1287 | 0.0004 | 6.727  | 0.1144 | 0.3792 | 0.0064 | 2080 | 5   | 2076 | 15 | 2073 | 30 | 100.4 | 2080       | 5  |
| 91SH6-41                                                                                                                                                 | 211 | 0.67 | 0.0675 | 0.0011 | 1.300  | 0.0286 | 0.1396 | 0.0018 | 854  | 36  | 846  | 12 | 842  | 10 | 100.4 | 842        | 10 |
| 91SH6-42                                                                                                                                                 | 166 | 0.56 | 0.1302 | 0.0008 | 7.120  | 0.1709 | 0.3967 | 0.0095 | 2100 | 11  | 2127 | 22 | 2154 | 43 | 97.5  | 2100       | 11 |
| 91SH6-44                                                                                                                                                 | 169 | 1.00 | 0.0674 | 0.0016 | 1.291  | 0.0387 | 0.1390 | 0.0024 | 850  | 50  | 842  | 17 | 839  | 14 | 100.4 | 839        | 14 |
| 91SH6-45                                                                                                                                                 | 275 | 0.53 | 0.0673 | 0.0007 | 1.245  | 0.0237 | 0.1342 | 0.0021 | 847  | 22  | 821  | 11 | 812  | 12 | 101.1 | 812        | 12 |
| 91SH6-46                                                                                                                                                 | 146 | 0.83 | 0.0574 | 0.0041 | 0.5947 | 0.0434 | 0.0751 | 0.0005 | 508  | 159 | 474  | 28 | 467  | 3  | 101.5 | 467        | 3  |
| 91SH6-47                                                                                                                                                 | 269 | 0.59 | 0.0673 | 0.0009 | 1.320  | 0.0304 | 0.1422 | 0.0026 | 848  | 29  | 855  | 13 | 857  | 15 | 99.7  | 857        | 15 |
| 91SH6-48                                                                                                                                                 | 162 | 1.00 | 0.0679 | 0.0016 | 1.315  | 0.0329 | 0.1404 | 0.0014 | 866  | 48  | 852  | 15 | 847  | 8  | 100.6 | 847        | 8  |
| 91SH6-49                                                                                                                                                 | 222 | 1.00 | 0.1082 | 0.0005 | 4.903  | 0.0539 | 0.3287 | 0.0033 | 1769 | 8   | 1803 | 9  | 1832 | 16 | 96.5  | 1769       | 8  |
| 91SH6-50                                                                                                                                                 | 298 | 0.83 | 0.1860 | 0.0007 | 13.669 | 0.2460 | 0.5329 | 0.0091 | 2707 | 7   | 2727 | 17 | 2754 | 39 | 98.3  | 2707       | 7  |
| 91SH6-51                                                                                                                                                 | 618 | 1.11 | 0.0683 | 0.0021 | 1.005  | 0.0834 | 0.1067 | 0.0082 | 879  | 64  | 707  | 42 | 654  | 48 | 108.1 | 654        | 48 |
| 91SH6-52                                                                                                                                                 | 143 | 0.77 | 0.0671 | 0.0018 | 1.246  | 0.0611 | 0.1347 | 0.0055 | 842  | 55  | 822  | 27 | 815  | 31 | 100.9 | 815        | 31 |
| 91SH6-53                                                                                                                                                 | 441 | 0.36 | 0.0719 | 0.0019 | 1.204  | 0.0518 | 0.1215 | 0.0040 | 983  | 54  | 802  | 24 | 739  | 23 | 108.6 | 739        | 23 |
| 91SH6-54                                                                                                                                                 | 204 | 1.25 | 0.0654 | 0.0014 | 1.193  | 0.0263 | 0.1324 | 0.0012 | 786  | 43  | 797  | 12 | 802  | 7  | 99.5  | 802        | 7  |
| 91SH6-55                                                                                                                                                 | 498 | 0.30 | 0.0567 | 0.0016 | 0.5446 | 0.0180 | 0.0696 | 0.0012 | 480  | 64  | 441  | 12 | 434  | 7  | 101.7 | 434        | 7  |
| 91SH6-56                                                                                                                                                 | 304 | 1.00 | 0.0662 | 0.0011 | 1.156  | 0.0231 | 0.1267 | 0.0011 | 812  | 36  | 780  | 11 | 769  | 7  | 101.4 | 769        | 7  |
| 91SH6-57                                                                                                                                                 | 59  | 1.67 | 0.0653 | 0.0025 | 1.151  | 0.0461 | 0.1280 | 0.0013 | 783  | 82  | 778  | 22 | 776  | 7  | 100.2 | 776        | 7  |
| 91SH6-58                                                                                                                                                 | 121 | 0.71 | 0.1108 | 0.0017 | 4.707  | 0.0753 | 0.3082 | 0.0018 | 1812 | 27  | 1769 | 14 | 1732 | 9  | 104.7 | 1812       | 27 |
| 91SH6-59                                                                                                                                                 | 172 | 0.67 | 0.0657 | 0.0018 | 1.223  | 0.0367 | 0.1350 | 0.0016 | 798  | 59  | 811  | 17 | 816  | 10 | 99.4  | 816        | 10 |
| 91SH6-60                                                                                                                                                 | 263 | 1.00 | 0.0677 | 0.0037 | 1.130  | 0.0961 | 0.1210 | 0.0079 | 861  | 113 | 768  | 46 | 736  | 45 | 104.3 | 736        | 45 |
| 91SH6-61                                                                                                                                                 | 201 | 1.25 | 0.0666 | 0.0007 | 1.191  | 0.0167 | 0.1298 | 0.0012 | 825  | 23  | 797  | 8  | 787  | 6  | 101.3 | 787        | 6  |
| 91SH6-62                                                                                                                                                 | 203 | 0.63 | 0.0652 | 0.0009 | 1.135  | 0.0216 | 0.1262 | 0.0018 | 781  | 29  | 770  | 11 | 766  | 10 | 100.5 | 766        | 10 |
| 91SH6-63                                                                                                                                                 | 167 | 0.91 | 0.0679 | 0.0019 | 1.251  | 0.0388 | 0.1337 | 0.0015 | 864  | 59  | 824  | 17 | 809  | 9  | 101.8 | 809        | 9  |
| 91SH6-64                                                                                                                                                 | 117 | 0.42 | 0.1124 | 0.0009 | 5.181  | 0.0570 | 0.3343 | 0.0030 | 1839 | 14  | 1850 | 10 | 1859 | 14 | 98.9  | 1839       | 14 |
| 91SH6-66                                                                                                                                                 | 246 | 0.77 | 0.0655 | 0.0014 | 1.207  | 0.0266 | 0.1336 | 0.0007 | 792  | 45  | 804  | 12 | 808  | 4  | 99.5  | 808        | 4  |
| 91SH6-67                                                                                                                                                 | 28  | 0.91 | 0.1135 | 0.0034 | 5.142  | 0.1594 | 0.3286 | 0.0023 | 1856 | 55  | 1843 | 27 | 1832 | 12 | 101.3 | 1856       | 55 |
| 91SH6-68                                                                                                                                                 | 903 | 0.02 | 0.0722 | 0.0008 | 1.238  | 0.0656 | 0.1244 | 0.0065 | 991  | 22  | 818  | 30 | 756  | 37 | 108.2 | 756        | 37 |
| 91SH6-69                                                                                                                                                 | 176 | 1.67 | 0.0660 | 0.0014 | 1.120  | 0.0235 | 0.1230 | 0.0004 | 808  | 44  | 763  | 12 | 748  | 2  | 102.0 | 748        | 2  |
| 91SH6-71                                                                                                                                                 | 53  | 1.67 | 0.0654 | 0.0069 | 1.104  | 0.1170 | 0.1224 | 0.0020 | 789  | 221 | 755  | 57 | 744  | 11 | 101.5 | 744        | 11 |
| 91SH6-72                                                                                                                                                 | 305 | 1.11 | 0.0855 | 0.0007 | 2.513  | 0.0377 | 0.2132 | 0.0028 | 1327 | 15  | 1276 | 11 | 1246 | 15 | 106.5 | 1327       | 15 |
| 91SH6-73                                                                                                                                                 | 247 | 0.50 | 0.0668 | 0.0008 | 1.272  | 0.0254 | 0.1381 | 0.0022 | 833  | 26  | 833  | 12 | 834  | 13 | 100.0 | 834        | 13 |
| 91SH6-74                                                                                                                                                 | 248 | 0.71 | 0.0665 | 0.0014 | 1.217  | 0.0280 | 0.1327 | 0.0012 | 823  | 45  | 808  | 13 | 803  | 7  | 100.7 | 803        | 7  |
| 91SH6-76                                                                                                                                                 | 244 | 0.31 | 0.1253 | 0.0008 | 6.470  | 0.0906 | 0.3745 | 0.0049 | 2033 | 11  | 2042 | 12 | 2051 | 22 | 99.1  | 2033       | 11 |
| 91SH6-78                                                                                                                                                 | 101 | 0.83 | 0.0625 | 0.0056 | 0.8173 | 0.0727 | 0.0948 | 0.0006 | 692  | 190 | 607  | 41 | 584  | 3  | 103.9 | 584        | 3  |
| 91SH6-79                                                                                                                                                 |     |      |        |        |        |        |        |        |      |     |      |    |      |    |       |            |    |



|    |      |     |      |        |        |        |        |        |        |      |     |      |    |      |    |       |            |    |
|----|------|-----|------|--------|--------|--------|--------|--------|--------|------|-----|------|----|------|----|-------|------------|----|
| 24 | 392  | 464 | 0.85 | 0.0740 | 0.0003 | 1.743  | 0.0147 | 0.1707 | 0.0011 | 1041 | 7   | 1025 | 5  | 1016 | 6  | 102.5 | 1041       | 7  |
| 25 | 405  | 618 | 0.66 | 0.0583 | 0.0002 | 0.6457 | 0.0050 | 0.0804 | 0.0006 | 540  | 7   | 506  | 3  | 499  | 4  | 101.4 | 499        | 4  |
| 26 | 173  | 232 | 0.75 | 0.0555 | 0.0003 | 0.5656 | 0.0054 | 0.0739 | 0.0005 | 433  | 10  | 455  | 4  | 460  | 3  | 98.9  | 460        | 3  |
| 27 | 40   | 959 | 0.04 | 0.0722 | 0.0003 | 1.551  | 0.0131 | 0.1562 | 0.0016 | 993  | 9   | 951  | 5  | 935  | 9  | 101.7 | 935        | 9  |
| 28 | 413  | 496 | 0.83 | 0.0696 | 0.0004 | 0.6935 | 0.0092 | 0.0727 | 0.0010 | 916  | 12  | 535  | 5  | 452  | 6  | 118.4 | Discordant |    |
| 29 | 515  | 490 | 1.05 | 0.0560 | 0.0002 | 0.5886 | 0.0054 | 0.0762 | 0.0006 | 454  | 9   | 470  | 3  | 473  | 4  | 99.4  | 473        | 4  |
| 30 | 655  | 876 | 0.75 | 0.1123 | 0.0017 | 1.640  | 0.0515 | 0.1030 | 0.0022 | 1837 | 27  | 986  | 20 | 632  | 13 | 156.0 | Discordant |    |
| 31 | 107  | 151 | 0.71 | 0.0559 | 0.0004 | 0.5257 | 0.0071 | 0.0682 | 0.0006 | 449  | 15  | 429  | 5  | 425  | 3  | 100.9 | 425        | 3  |
| 32 | 590  | 486 | 1.22 | 0.0561 | 0.0003 | 0.5662 | 0.0065 | 0.0731 | 0.0007 | 456  | 11  | 456  | 4  | 455  | 4  | 100.2 | 455        | 4  |
| 33 | 111  | 805 | 0.14 | 0.0720 | 0.0003 | 1.595  | 0.0134 | 0.1607 | 0.0013 | 986  | 7   | 968  | 5  | 961  | 7  | 100.7 | 961        | 7  |
| 34 | 183  | 212 | 0.86 | 0.0716 | 0.0004 | 1.558  | 0.0198 | 0.1580 | 0.0018 | 973  | 11  | 953  | 8  | 945  | 10 | 100.8 | 945        | 10 |
| 35 | 202  | 429 | 0.47 | 0.0727 | 0.0002 | 1.663  | 0.0101 | 0.1660 | 0.0010 | 1004 | 5   | 994  | 4  | 990  | 5  | 100.4 | 990        | 5  |
| 36 | 180  | 312 | 0.58 | 0.1002 | 0.0005 | 3.901  | 0.0402 | 0.2818 | 0.0023 | 1628 | 8   | 1614 | 8  | 1600 | 11 | 101.8 | 1628       | 8  |
| 37 | 407  | 589 | 0.69 | 0.0675 | 0.0002 | 0.6330 | 0.0047 | 0.0680 | 0.0004 | 853  | 7   | 498  | 3  | 424  | 2  | 117.5 | Discordant |    |
| 38 | 36   | 107 | 0.33 | 0.0556 | 0.0005 | 0.5663 | 0.0082 | 0.0739 | 0.0005 | 437  | 18  | 456  | 5  | 460  | 3  | 99.1  | 460        | 3  |
| 39 | 350  | 787 | 0.44 | 0.0991 | 0.0003 | 3.218  | 0.0193 | 0.2355 | 0.0014 | 1608 | 5   | 1462 | 5  | 1363 | 7  | 118.0 | Discordant |    |
| 40 | 529  | 680 | 0.78 | 0.1615 | 0.0012 | 7.482  | 0.1197 | 0.3362 | 0.0055 | 2471 | 12  | 2171 | 14 | 1868 | 27 | 132.3 | Discordant |    |
| 41 | 1258 | 892 | 1.41 | 0.0609 | 0.0002 | 1.687  | 0.0113 | 0.1546 | 0.0011 | 635  | 6   | 1004 | 4  | 927  | 6  | 108.3 | 927        | 6  |
| 42 | 450  | 590 | 0.76 | 0.0729 | 0.0002 | 0.6725 | 0.0047 | 0.0672 | 0.0005 | 1010 | 6   | 522  | 3  | 419  | 3  | 124.6 | Discordant |    |
| 43 | 443  | 494 | 0.90 | 0.0877 | 0.0017 | 0.9915 | 0.0414 | 0.0855 | 0.0028 | 1375 | 32  | 700  | 21 | 529  | 17 | 132.3 | Discordant |    |
| 44 | 142  | 269 | 0.53 | 0.1329 | 0.0004 | 7.222  | 0.0448 | 0.3939 | 0.0023 | 2137 | 4   | 2139 | 6  | 2141 | 11 | 99.8  | 2137       | 4  |
| 45 | 158  | 127 | 1.24 | 0.0686 | 0.0007 | 1.387  | 0.0236 | 0.1467 | 0.0012 | 887  | 19  | 884  | 10 | 882  | 7  | 100.2 | 882        | 7  |
| 46 | 166  | 336 | 0.49 | 0.0601 | 0.0004 | 0.6548 | 0.0092 | 0.0790 | 0.0007 | 607  | 13  | 511  | 6  | 490  | 4  | 104.3 | 490        | 4  |
| 47 | 40   | 119 | 0.34 | 0.0704 | 0.0003 | 1.568  | 0.0160 | 0.1614 | 0.0014 | 941  | 8   | 957  | 6  | 964  | 8  | 99.3  | 964        | 8  |
| 49 | 136  | 288 | 0.47 | 0.0729 | 0.0004 | 1.681  | 0.0180 | 0.1671 | 0.0012 | 1011 | 9   | 1001 | 7  | 996  | 7  | 100.5 | 996        | 7  |
| 50 | 380  | 572 | 0.67 | 0.0580 | 0.0004 | 0.6359 | 0.0086 | 0.0796 | 0.0011 | 530  | 12  | 500  | 5  | 494  | 7  | 101.2 | 494        | 7  |
| 51 | 363  | 423 | 0.86 | 0.0622 | 0.0003 | 0.6146 | 0.0076 | 0.0716 | 0.0008 | 682  | 12  | 486  | 5  | 446  | 5  | 109.0 | 446        | 5  |
| 52 | 74   | 158 | 0.47 | 0.0732 | 0.0005 | 1.649  | 0.0232 | 0.1628 | 0.0017 | 1020 | 14  | 989  | 9  | 972  | 9  | 101.7 | 972        | 9  |
| 53 | 159  | 198 | 0.80 | 0.1169 | 0.0067 | 1.240  | 0.1181 | 0.0731 | 0.0034 | 1910 | 105 | 819  | 54 | 455  | 21 | 180.0 | Discordant |    |
| 54 | 439  | 465 | 0.94 | 0.0715 | 0.0005 | 0.6963 | 0.0094 | 0.0707 | 0.0005 | 972  | 16  | 537  | 6  | 440  | 3  | 122.0 | Discordant |    |
| 55 | 199  | 249 | 0.80 | 0.0566 | 0.0004 | 0.5708 | 0.0091 | 0.0730 | 0.0010 | 474  | 16  | 459  | 6  | 454  | 6  | 101.1 | 454        | 6  |
| 56 | 149  | 210 | 0.71 | 0.0596 | 0.0002 | 0.6352 | 0.0055 | 0.0774 | 0.0005 | 587  | 9   | 499  | 3  | 481  | 3  | 103.7 | 481        | 3  |
| 57 | 292  | 486 | 0.60 | 0.0558 | 0.0002 | 0.5202 | 0.0048 | 0.0676 | 0.0005 | 444  | 9   | 425  | 3  | 422  | 3  | 100.7 | 422        | 3  |
| 58 | 127  | 176 | 0.72 | 0.0554 | 0.0003 | 0.5315 | 0.0057 | 0.0696 | 0.0005 | 426  | 12  | 433  | 4  | 434  | 3  | 99.8  | 434        | 3  |
| 59 | 83   | 197 | 0.42 | 0.0761 | 0.0003 | 1.881  | 0.0167 | 0.1791 | 0.0014 | 1098 | 8   | 1074 | 6  | 1062 | 8  | 103.4 | 1098       | 8  |
| 60 | 154  | 427 | 0.36 | 0.0561 | 0.0005 | 0.4878 | 0.0069 | 0.0631 | 0.0004 | 455  | 20  | 403  | 5  | 394  | 3  | 102.3 | 394        | 3  |

Sample 09SBL21, sandstone, Middle-Late Silurian Tushibulake Formation in Quruqtagh area of northern Tarim, (Zhang et al., 2012, Acta Geologica Sinica)

|    |      |      |      |        |        |        |        |        |        |      |    |      |    |      |    |       |            |    |
|----|------|------|------|--------|--------|--------|--------|--------|--------|------|----|------|----|------|----|-------|------------|----|
| 2  | 79   | 131  | 0.60 | 0.0796 | 0.0008 | 2.151  | 0.0401 | 0.1962 | 0.0022 | 1188 | 18 | 1165 | 13 | 1155 | 12 | 102.9 | 1188       | 18 |
| 3  | 467  | 1000 | 0.47 | 0.0620 | 0.0003 | 0.6386 | 0.0065 | 0.0747 | 0.0008 | 675  | 10 | 501  | 4  | 465  | 5  | 107.7 | 465        | 5  |
| 3  | 302  | 328  | 0.92 | 0.0715 | 0.0003 | 1.552  | 0.0142 | 0.1573 | 0.0013 | 972  | 8  | 951  | 6  | 942  | 7  | 101.0 | 942        | 7  |
| 4  | 134  | 117  | 1.14 | 0.0591 | 0.0004 | 0.7370 | 0.0122 | 0.0905 | 0.0012 | 571  | 15 | 561  | 7  | 559  | 7  | 100.4 | 559        | 7  |
| 5  | 168  | 198  | 0.85 | 0.0717 | 0.0004 | 1.637  | 0.0194 | 0.1657 | 0.0018 | 977  | 10 | 985  | 7  | 988  | 10 | 99.7  | 988        | 10 |
| 6  | 17   | 194  | 0.09 | 0.0704 | 0.0003 | 1.525  | 0.0167 | 0.1571 | 0.0016 | 941  | 9  | 941  | 7  | 941  | 9  | 100.0 | 941        | 9  |
| 7  | 179  | 825  | 0.22 | 0.1174 | 0.0006 | 5.000  | 0.0510 | 0.3090 | 0.0033 | 1917 | 8  | 1819 | 9  | 1736 | 16 | 110.4 | Discordant |    |
| 8  | 217  | 193  | 1.12 | 0.0604 | 0.0003 | 0.8513 | 0.0083 | 0.1023 | 0.0008 | 617  | 9  | 625  | 5  | 628  | 4  | 99.5  | 628        | 4  |
| 10 | 356  | 678  | 0.53 | 0.0561 | 0.0002 | 0.5650 | 0.0049 | 0.0730 | 0.0006 | 458  | 8  | 455  | 3  | 454  | 3  | 100.2 | 454        | 3  |
| 11 | 43   | 36   | 1.19 | 0.0592 | 0.0011 | 0.7039 | 0.0210 | 0.0868 | 0.0012 | 574  | 39 | 541  | 13 | 537  | 7  | 100.7 | 537        | 7  |
| 12 | 226  | 331  | 0.68 | 0.0759 | 0.0003 | 1.713  | 0.0119 | 0.1636 | 0.0008 | 1092 | 6  | 1013 | 4  | 977  | 5  | 103.7 | 977        | 5  |
| 13 | 285  | 425  | 0.67 | 0.0562 | 0.0002 | 0.6019 | 0.0057 | 0.0776 | 0.0006 | 461  | 9  | 478  | 4  | 482  | 3  | 99.2  | 482        | 3  |
| 14 | 285  | 517  | 0.55 | 0.0743 | 0.0003 | 1.686  | 0.0132 | 0.1649 | 0.0014 | 1049 | 7  | 1003 | 5  | 984  | 8  | 101.9 | 984        | 8  |
| 15 | 54   | 27   | 2.00 | 0.0713 | 0.0009 | 1.602  | 0.0384 | 0.1632 | 0.0025 | 966  | 24 | 971  | 15 | 975  | 14 | 99.6  | 975        | 14 |
| 16 | 183  | 379  | 0.48 | 0.0559 | 0.0003 | 0.5864 | 0.0057 | 0.0760 | 0.0005 | 450  | 10 | 469  | 4  | 472  | 3  | 99.4  | 472        | 3  |
| 17 | 130  | 298  | 0.44 | 0.0560 | 0.0003 | 0.5620 | 0.0069 | 0.0728 | 0.0008 | 453  | 11 | 453  | 4  | 453  | 5  | 100.0 | 453        | 5  |
| 18 | 432  | 342  | 1.26 | 0.0966 | 0.0003 | 3.631  | 0.0246 | 0.2728 | 0.0018 | 1559 | 5  | 1556 | 5  | 1555 | 9  | 100.3 | 1559       | 5  |
| 19 | 310  | 375  | 0.83 | 0.0718 | 0.0003 | 1.658  | 0.0151 | 0.1676 | 0.0015 | 979  | 8  | 993  | 6  | 999  | 8  | 99.4  | 999        | 8  |
| 20 | 273  | 354  | 0.77 | 0.1039 | 0.0004 | 4.257  | 0.0358 | 0.2970 | 0.0023 | 1694 | 7  | 1685 | 7  | 1677 | 11 | 101.0 | 1694       | 7  |
| 21 | 158  | 293  | 0.54 | 0.0777 | 0.0003 | 1.905  | 0.0172 | 0.1779 | 0.0014 | 1139 | 8  | 1083 | 6  | 1055 | 8  | 108.0 | 1139       | 8  |
| 22 | 258  | 348  | 0.74 | 0.0708 | 0.0003 | 1.611  | 0.0138 | 0.1651 | 0.0013 | 951  | 8  | 974  | 5  | 985  | 7  | 98.9  | 985        | 7  |
| 23 | 31   | 74   | 0.42 | 0.0740 | 0.0005 | 2.070  | 0.0320 | 0.2031 | 0.0027 | 1040 | 13 | 1139 | 11 | 1192 | 14 | 87.2  | Discordant |    |
| 24 | 192  | 619  | 0.31 | 0.0712 | 0.0003 | 1.598  | 0.0136 | 0.1628 | 0.0013 | 962  | 7  | 969  | 5  | 972  | 7  | 99.7  | 972        | 7  |
| 25 | 255  | 746  | 0.34 | 0.1727 | 0.0006 | 11.297 | 0.0853 | 0.4742 | 0.0034 | 2584 | 5  | 2548 | 7  | 2502 | 15 | 103.3 | 2584       | 5  |
| 26 | 494  | 1085 | 0.46 | 0.0573 | 0.0002 | 0.5784 | 0.0038 | 0.0732 | 0.0004 | 504  | 6  | 463  | 2  | 455  | 3  | 101.8 | 455        | 3  |
| 27 | 304  | 800  | 0.38 | 0.0757 | 0.0003 | 1.910  | 0.0142 | 0.1829 | 0.0013 | 1087 | 6  | 1084 | 5  | 1083 | 7  | 100.4 | 1087       | 6  |
| 28 | 122  | 200  | 0.61 | 0.0547 | 0.0004 | 0.5479 | 0.0087 | 0.0726 | 0.0008 | 401  | 16 | 444  | 6  | 452  | 5  | 98.2  | 452        | 5  |
| 29 | 36   | 591  | 0.06 | 0.0578 | 0.0002 | 0.5889 | 0.0051 | 0.0739 | 0.0005 | 522  | 8  | 470  | 3  | 459  | 3  | 102.4 | 459        | 3  |
| 30 | 262  | 777  | 0.34 | 0.1787 | 0.0007 | 11.310 | 0.1017 | 0.4587 | 0.0040 | 2641 | 6  | 2549 | 8  | 2434 | 17 | 108.5 | 2641       | 6  |
| 31 | 232  | 408  | 0.57 | 0.0562 | 0.0002 | 0.5595 | 0.0053 | 0.0723 | 0.0006 | 458  | 9  | 451  | 3  | 450  | 4  | 100.2 | 450        | 4  |
| 32 | 54   | 111  | 0.48 | 0.2449 | 0.0011 | 20.977 | 0.2030 | 0.6211 | 0.0059 | 3152 | 7  | 3138 | 9  | 3114 | 23 | 101.2 | 3152       | 7  |
| 33 | 61   | 85   | 0.71 | 0.1139 | 0.0005 | 5.236  | 0.0518 | 0.3332 | 0.0029 | 1863 | 8  | 1859 | 8  | 1854 | 14 | 100.5 | 1863       | 8  |
| 34 | 146  | 326  | 0.45 | 0.0608 | 0.0004 | 0.8809 | 0.0108 | 0.1050 | 0.0009 | 633  | 12 | 641  | 6  | 644  | 5  | 99.5  | 644        | 5  |
| 35 | 626  | 1030 | 0.61 | 0.0561 | 0.0002 | 0.5813 | 0.0043 | 0.0751 | 0.0005 | 457  | 7  | 465  | 3  | 467  | 3  | 99.6  | 467        | 3  |
| 36 | 136  | 1252 | 0.11 | 0.0706 | 0.0003 | 1.505  | 0.0131 | 0.1544 | 0.0013 | 947  | 8  | 932  | 5  | 926  | 7  | 100.6 | 926        | 7  |
| 37 | 1140 | 1297 | 0.88 | 0.0603 | 0.0002 | 0.5318 | 0.0042 | 0.0640 | 0.0004 | 612  | 7  | 433  | 3  | 400  | 3  | 108.3 | 400        | 3  |
| 38 | 76   | 153  | 0.49 | 0.0705 | 0.0003 | 1.575  | 0.0166 | 0.1623 | 0.0015 | 942  | 9  | 960  | 7  | 969  | 8  | 99.1  | 969        | 8  |
| 39 | 638  | 775  | 0.82 | 0.0562 | 0.0002 | 0.5651 | 0.0052 | 0.0730 | 0.0006 | 459  | 9  | 455  | 3  | 454  | 4  | 100.2 | 454        | 4  |
| 40 | 58   | 85   | 0.68 | 0.0829 | 0.0005 | 2.528  | 0.0312 | 0.2214 | 0.0024 | 1267 | 10 | 1280 | 9  | 1289 | 12 | 98.3  | 1267       | 10 |
| 41 | 53   | 135  | 0.39 | 0.0994 | 0.0004 | 3.953  | 0.0363 | 0.2885 | 0.0024 | 1613 | 7  | 1625 | 7  | 1634 | 12 | 98.7  | 1613       | 7  |
| 42 | 137  | 197  | 0.70 | 0.0654 | 0.0003 | 1.251  | 0.0125 | 0.1387 | 0.0011 | 786  | 9  | 824  | 6  | 837  | 6  | 98.4  | 837        | 6  |
| 43 | 216  | 672  | 0.32 | 0.0696 | 0.0003 | 1.466  | 0.0131 | 0.1528 | 0.0013 | 916  | 8  | 916  | 5  | 917  | 7  | 99.9  | 917        | 7  |
| 44 | 11   | 506  | 0.24 | 0.0708 | 0.0003 | 1.562  | 0.0133 | 0.1600 | 0.0012 | 950  | 7  | 955  | 5  | 957  | 7  | 99.8  | 957        | 7  |
| 45 | 413  | 563  | 0.73 | 0.0589 | 0.0003 | 0.5656 | 0.0061 | 0.0696 | 0.0004 | 563  | 12 | 455  | 4  | 434  | 3  | 104.8 | 434        | 3  |
| 46 | 291  | 390  | 0.75 | 0.0547 | 0.0003 | 0.5836 | 0.0061 | 0.0773 | 0.0007 | 401  | 10 | 467  | 4  | 480  | 4  | 97.3  | 480        | 4  |
| 47 | 104  | 135  | 0.77 | 0.1018 | 0.0004 | 4.201  | 0.0383 | 0.2989 | 0.0023 | 1658 | 7  | 1674 | 7  | 1686 | 11 | 98.3  | 1658       | 7  |
| 48 | 47   | 86   | 0.55 | 0.0710 | 0.0004 | 1.631  | 0.0214 | 0.1665 | 0.0018 | 958  | 12 | 982  | 8  | 993  | 10 | 98.9  | 993        | 10 |
| 50 | 93   | 939  | 0.10 | 0.0706 | 0.0003 | 1.503  | 0.0140 | 0.1544 | 0.0014 | 946  | 8  | 932  | 6  | 925  | 8  | 100.8 | 925        | 8  |
| 52 | 67   | 63   | 1.06 | 0.0664 | 0.0006 | 1.235  | 0.0211 | 0.1349 | 0.0014 | 818  | 19 | 817  | 10 | 816  | 8  | 100.1 | 816        | 8  |
| 53 | 385  | 509  | 0.76 | 0.0555 | 0.0002 | 0.5509 | 0.0054 | 0.0720 | 0.0006 | 431  | 9  | 446  | 4  | 448  | 4  | 99.6  | 448        | 4  |
| 54 | 345  | 377  | 0.91 | 0.0651 | 0.0002 | 1.194  | 0.0095 | 0.1329 | 0.0009 | 779  | 7  | 798  | 4  | 804  | 5  | 99.3  | 804        | 5  |
| 55 | 144  | 131  | 1.10 | 0.0999 | 0.0004 | 4.129  | 0.0386 | 0.2997 | 0.0026 | 1623 | 7  | 1660 | 8  | 1690 | 13 | 96.0  | 1623       | 7  |
| 56 | 124  | 152  | 0.81 | 0.0648 | 0.0003 | 1.188  | 0.0118 | 0.1332 | 0.0011 | 766  | 9  | 795  | 5  | 806  | 6  | 98.6  | 806        | 6  |
| 57 | 477  | 610  | 0.78 | 0.0557 | 0.0002 | 0.5630 | 0.0046 | 0.0733 | 0.0004 | 439  | 9  | 453  | 3  | 456  | 2  | 99.3  | 456        | 2  |
| 58 | 202  | 176  | 1.15 | 0.0780 | 0.0003 | 2.120  | 0.0190 | 0.1972 | 0.0016 | 1146 | 8  | 1155 | 6  | 1160 | 9  | 98.8  | 1146       | 8  |
| 59 | 30   | 86   | 0.34 | 0.0691 | 0.0005 | 1.553  | 0.0224 | 0.1630 | 0.0017 | 903  | 14 | 952  | 9  | 973  | 9  | 97.8  | 973        | 9  |
| 60 | 28   | 54   | 0.51 | 0.0592 | 0.0008 | 0.7717 | 0.0185 | 0.0950 | 0.0012 | 575  | 30 | 581  | 11 | 585  | 7  | 99.3  | 585        | 7  |
| 61 | 194  | 438  | 0.44 | 0.0673 | 0.0003 | 1.310  | 0.0112 | 0.1412 | 0.0011 | 847  | 8  | 850  | 5  | 851  | 6  | 99.9  | 851        | 6  |
| 62 | 73   | 56   | 1.31 | 0.0627 | 0.0007 | 1.100  | 0.0216 | 0.1272 | 0.0014 | 697  | 22 | 753  | 10 | 772  | 8  | 97.5  | 772        | 8  |
| 63 | 129  | 321  | 0.40 | 0.0555 | 0.0003 | 0.5472 | 0.0059 | 0.0715 | 0.0005 | 431  | 11 | 443  | 4  | 445  | 3  | 99.6  | 445        | 3  |
| 64 | 461  | 376  | 1.22 | 0.0709 | 0.0003 | 1.556  | 0.0124 | 0.1593 | 0.0012 | 955  | 7  | 953  | 5  | 953  | 7  | 100.0 | 953        | 7  |
| 65 | 227  | 291  | 0.78 | 0.0660 | 0.0003 | 1.197  | 0.0116 | 0.1316 | 0.0010 | 807  | 9  | 799  | 5  | 797  | 5  | 100.3 | 797        | 5  |
| 66 | 464  | 595  | 0.78 | 0.0563 | 0.0002 | 0.5704 | 0.0052 | 0.0734 | 0.0006 | 465  | 9  | 458  | 3  | 457  | 3  | 100.2 | 457        | 3  |
| 67 | 72   | 112  | 0.64 | 0.0565 | 0.0012 | 0.5690 | 0.0159 | 0.0729 | 0.0006 | 471  | 44 | 457  | 10 | 453  | 4  | 100.9 | 453        | 4  |
| 68 | 456  | 604  | 0.75 | 0.0719 | 0.0003 | 1.651  | 0.0131 | 0.1665 | 0.0012 | 984  | 7  | 990  | 5  | 993  | 7  | 99.7  | 993        | 7  |
| 69 | 284  | 557  | 0.51 | 0.0572 | 0.0003 | 0.5089 | 0.0055 | 0.0645 | 0.0006 | 499  | 10 | 418  | 4  | 403  | 3  | 103.7 | 403        | 3  |
| 70 | 270  | 698  | 0.39 | 0.1641 | 0.0007 | 9.991  | 0.0892 | 0.4416 | 0.0040 | 2498 | 7  | 2434 | 8  | 2358 | 18 | 105.9 | 2498       | 7  |
| 71 | 140  | 368  | 0.38 | 0.0554 | 0.0003 | 0.5426 | 0.0062 | 0.0711 | 0.0007 | 429  | 11 | 440  | 4  | 443  | 4  | 99.3  | 443        | 4  |
| 72 | 512  | 784  | 0.65 | 0.0585 | 0.0003 | 0.5363 | 0.0051 | 0.0667 | 0.0007 | 549  | 10 | 436  | 3  | 416  | 4  | 104.8 | 416        | 4  |
| 73 | 224  | 517  | 0.43 | 0.1092 | 0.0004 | 4.716  | 0.0373 | 0.3133 | 0.0024 | 1786 | 6  | 1770 | 7  | 1757 | 12 | 101.7 | 1786       | 6  |
| 74 | 160  | 112  | 1.42 | 0.0703 | 0.0003 | 1.561  | 0.0157 | 0.1611 | 0.0013 | 937  | 9  | 955  | 6  | 963  | 7  | 99.2  | 963        | 7  |
| 75 | 367  | 349  | 1.05 | 0.0554 | 0.0002 | 0.5767 | 0.0052 | 0.0755 | 0.0005 | 428  | 9  | 462  | 3  | 469  | 3  | 98.5  | 469        | 3  |
| 76 | 46   | 113  | 0.40 | 0.0568 | 0.0006 | 0.5752 | 0.0104 | 0.0737 | 0.0007 | 484  | 22 | 461  | 7  | 458  | 4  | 100.7 | 458        | 4  |
| 77 | 254  | 357  | 0.71 | 0.0556 | 0.0003 | 0.5425 | 0.0054 | 0.0707 | 0.0005 |      |    |      |    |      |    |       |            |    |

|    |     |     |      |        |        |        |        |        |        |      |    |      |    |      |    |       |      |    |
|----|-----|-----|------|--------|--------|--------|--------|--------|--------|------|----|------|----|------|----|-------|------|----|
| 85 | 259 | 472 | 0.55 | 0.1681 | 0.0006 | 11.276 | 0.0834 | 0.4862 | 0.0034 | 2539 | 5  | 2546 | 7  | 2554 | 15 | 99.4  | 2539 | 5  |
| 86 | 48  | 138 | 0.35 | 0.2101 | 0.0014 | 16.370 | 0.2432 | 0.5623 | 0.0063 | 2906 | 11 | 2899 | 14 | 2876 | 26 | 101.0 | 2906 | 11 |
| 87 | 130 | 298 | 0.43 | 0.0610 | 0.0002 | 0.8498 | 0.0075 | 0.1010 | 0.0007 | 639  | 8  | 625  | 4  | 620  | 4  | 100.8 | 620  | 4  |
| 88 | 377 | 526 | 0.72 | 0.0565 | 0.0002 | 0.5562 | 0.0047 | 0.0715 | 0.0006 | 473  | 8  | 449  | 3  | 445  | 3  | 100.9 | 445  | 3  |
| 89 | 277 | 328 | 0.84 | 0.0560 | 0.0003 | 0.5747 | 0.0055 | 0.0745 | 0.0005 | 451  | 10 | 461  | 4  | 463  | 3  | 99.6  | 463  | 3  |
| 90 | 46  | 79  | 0.58 | 0.0700 | 0.0004 | 1.525  | 0.0199 | 0.1581 | 0.0015 | 928  | 12 | 941  | 8  | 946  | 8  | 99.5  | 946  | 8  |

Sample 09SBL-28, sandstone, Middle-Late Silurian Tushibulake Formation in Quruqtagh area of northern Tarim, (Zhang et al., 2012, Acta Geologica Sinica)

|    |      |      |      |        |        |        |        |        |        |      |    |      |    |      |    |       |            |    |
|----|------|------|------|--------|--------|--------|--------|--------|--------|------|----|------|----|------|----|-------|------------|----|
| 1  | 170  | 408  | 0.42 | 0.0568 | 0.0003 | 0.6447 | 0.0064 | 0.0824 | 0.0006 | 483  | 10 | 505  | 4  | 510  | 4  | 99.0  | 510        | 4  |
| 2  | 142  | 156  | 0.91 | 0.0567 | 0.0004 | 0.5739 | 0.0077 | 0.0735 | 0.0006 | 481  | 15 | 461  | 5  | 457  | 4  | 100.9 | 457        | 4  |
| 3  | 262  | 510  | 0.51 | 0.0555 | 0.0002 | 0.5617 | 0.0051 | 0.0734 | 0.0005 | 433  | 9  | 453  | 3  | 456  | 3  | 99.3  | 456        | 3  |
| 4  | 34   | 203  | 0.17 | 0.0763 | 0.0003 | 2.008  | 0.0176 | 0.1910 | 0.0015 | 1102 | 8  | 1118 | 6  | 1127 | 8  | 97.8  | 1102       | 8  |
| 5  | 152  | 310  | 0.49 | 0.0732 | 0.0003 | 1.760  | 0.0170 | 0.1746 | 0.0013 | 1018 | 9  | 1031 | 6  | 1037 | 7  | 98.2  | 1018       | 9  |
| 6  | 131  | 269  | 0.49 | 0.1494 | 0.0004 | 8.964  | 0.0581 | 0.4354 | 0.0028 | 2338 | 5  | 2334 | 6  | 2330 | 12 | 100.3 | 2338       | 5  |
| 7  | 79   | 202  | 0.39 | 0.0676 | 0.0003 | 1.418  | 0.0135 | 0.1521 | 0.0012 | 856  | 9  | 896  | 6  | 913  | 7  | 98.1  | 913        | 7  |
| 8  | 301  | 339  | 0.89 | 0.1663 | 0.0005 | 10.545 | 0.0771 | 0.4599 | 0.0033 | 2521 | 5  | 2484 | 7  | 2439 | 15 | 103.4 | 2521       | 5  |
| 9  | 80   | 213  | 0.38 | 0.1085 | 0.0004 | 4.742  | 0.0385 | 0.3171 | 0.0024 | 1774 | 6  | 1775 | 7  | 1775 | 12 | 99.9  | 1774       | 6  |
| 10 | 184  | 594  | 0.31 | 0.1481 | 0.0007 | 8.883  | 0.0877 | 0.4353 | 0.0045 | 2324 | 8  | 2326 | 9  | 2329 | 20 | 99.8  | 2324       | 8  |
| 11 | 439  | 497  | 0.88 | 0.0558 | 0.0002 | 0.5509 | 0.0048 | 0.0716 | 0.0005 | 444  | 9  | 446  | 3  | 446  | 3  | 100.0 | 446        | 3  |
| 12 | 871  | 1710 | 0.51 | 0.0574 | 0.0002 | 0.5766 | 0.0044 | 0.0729 | 0.0005 | 506  | 7  | 462  | 3  | 453  | 3  | 102.0 | 453        | 3  |
| 13 | 573  | 644  | 0.89 | 0.0807 | 0.0003 | 2.090  | 0.0170 | 0.1883 | 0.0018 | 1214 | 8  | 1146 | 6  | 1112 | 10 | 109.2 | 1214       | 8  |
| 14 | 299  | 599  | 0.50 | 0.0794 | 0.0003 | 1.994  | 0.0154 | 0.1821 | 0.0012 | 1181 | 7  | 1114 | 5  | 1079 | 6  | 109.5 | 1181       | 7  |
| 15 | 167  | 213  | 0.78 | 0.0640 | 0.0003 | 1.155  | 0.0106 | 0.1309 | 0.0010 | 741  | 8  | 779  | 5  | 793  | 6  | 98.2  | 793        | 6  |
| 16 | 366  | 829  | 0.44 | 0.0763 | 0.0003 | 1.982  | 0.0174 | 0.1884 | 0.0016 | 1102 | 8  | 1109 | 6  | 1113 | 8  | 99.0  | 1102       | 8  |
| 17 | 135  | 525  | 0.26 | 0.0621 | 0.0003 | 0.9418 | 0.0094 | 0.1100 | 0.0011 | 678  | 9  | 674  | 5  | 673  | 6  | 100.1 | 673        | 6  |
| 18 | 135  | 266  | 0.51 | 0.0558 | 0.0003 | 0.5812 | 0.0069 | 0.0756 | 0.0007 | 444  | 12 | 465  | 4  | 470  | 4  | 98.9  | 470        | 4  |
| 19 | 170  | 1091 | 0.16 | 0.1759 | 0.0006 | 8.790  | 0.0634 | 0.3627 | 0.0027 | 2614 | 5  | 2316 | 7  | 1995 | 13 | 131.0 | Discordant |    |
| 20 | 514  | 852  | 0.60 | 0.0688 | 0.0003 | 1.240  | 0.0142 | 0.1308 | 0.0014 | 894  | 10 | 819  | 6  | 792  | 8  | 103.4 | 792        | 8  |
| 21 | 230  | 421  | 0.55 | 0.1626 | 0.0007 | 10.692 | 0.1014 | 0.4771 | 0.0046 | 2483 | 7  | 2497 | 9  | 2515 | 20 | 98.7  | 2483       | 7  |
| 22 | 113  | 635  | 0.18 | 0.0910 | 0.0003 | 3.129  | 0.0262 | 0.2494 | 0.0019 | 1446 | 7  | 1440 | 6  | 1435 | 10 | 100.8 | 1446       | 7  |
| 23 | 294  | 466  | 0.63 | 0.0585 | 0.0002 | 0.6343 | 0.0058 | 0.0788 | 0.0007 | 549  | 9  | 499  | 4  | 489  | 4  | 102.0 | 489        | 4  |
| 24 | 441  | 753  | 0.59 | 0.0562 | 0.0002 | 0.5778 | 0.0049 | 0.0746 | 0.0006 | 461  | 8  | 463  | 3  | 464  | 3  | 99.8  | 464        | 3  |
| 25 | 212  | 383  | 0.55 | 0.0563 | 0.0002 | 0.6005 | 0.0050 | 0.0774 | 0.0006 | 465  | 8  | 478  | 3  | 481  | 3  | 99.4  | 481        | 3  |
| 26 | 160  | 340  | 0.47 | 0.0738 | 0.0003 | 1.751  | 0.0152 | 0.1722 | 0.0014 | 1036 | 8  | 1027 | 6  | 1024 | 8  | 101.2 | 1036       | 8  |
| 27 | 194  | 269  | 0.72 | 0.0928 | 0.0003 | 3.283  | 0.0266 | 0.2567 | 0.0020 | 1483 | 7  | 1477 | 6  | 1473 | 10 | 100.7 | 1483       | 7  |
| 28 | 418  | 558  | 0.75 | 0.1005 | 0.0003 | 3.914  | 0.0264 | 0.2824 | 0.0018 | 1633 | 5  | 1617 | 5  | 1603 | 9  | 101.9 | 1633       | 5  |
| 29 | 885  | 762  | 1.16 | 0.0567 | 0.0002 | 0.5675 | 0.0045 | 0.0727 | 0.0006 | 481  | 8  | 456  | 3  | 452  | 4  | 100.9 | 452        | 4  |
| 30 | 191  | 443  | 0.43 | 0.0621 | 0.0004 | 0.8652 | 0.0116 | 0.1008 | 0.0010 | 678  | 13 | 633  | 6  | 619  | 6  | 102.3 | 619        | 6  |
| 31 | 470  | 572  | 0.82 | 0.0570 | 0.0003 | 0.5538 | 0.0067 | 0.0705 | 0.0008 | 493  | 11 | 447  | 4  | 439  | 5  | 101.8 | 439        | 5  |
| 32 | 49   | 74   | 0.66 | 0.0690 | 0.0004 | 1.213  | 0.0146 | 0.1278 | 0.0012 | 900  | 11 | 807  | 7  | 775  | 7  | 104.1 | 775        | 7  |
| 33 | 414  | 379  | 1.09 | 0.0567 | 0.0003 | 0.5517 | 0.0050 | 0.0705 | 0.0004 | 480  | 10 | 446  | 3  | 439  | 2  | 101.6 | 439        | 2  |
| 34 | 459  | 397  | 1.16 | 0.0559 | 0.0002 | 0.5293 | 0.0045 | 0.0687 | 0.0005 | 449  | 8  | 431  | 3  | 428  | 3  | 100.7 | 428        | 3  |
| 35 | 1    | 182  | 0.00 | 0.1216 | 0.0004 | 5.921  | 0.0472 | 0.3531 | 0.0027 | 1979 | 6  | 1964 | 7  | 1949 | 13 | 101.5 | 1979       | 6  |
| 36 | 115  | 118  | 0.97 | 0.1585 | 0.0005 | 9.420  | 0.0700 | 0.4311 | 0.0031 | 2439 | 5  | 2380 | 7  | 2311 | 14 | 105.5 | 2439       | 5  |
| 37 | 226  | 838  | 0.27 | 0.1166 | 0.0004 | 5.178  | 0.0370 | 0.3219 | 0.0022 | 1905 | 6  | 1849 | 6  | 1799 | 11 | 105.9 | 1905       | 6  |
| 38 | 383  | 305  | 1.26 | 0.0562 | 0.0003 | 0.5553 | 0.0056 | 0.0717 | 0.0006 | 462  | 10 | 448  | 4  | 446  | 4  | 100.4 | 446        | 4  |
| 39 | 892  | 955  | 0.93 | 0.0879 | 0.0003 | 2.154  | 0.0156 | 0.1779 | 0.0014 | 1380 | 7  | 1166 | 5  | 1055 | 8  | 130.8 | Discordant |    |
| 40 | 123  | 298  | 0.41 | 0.0816 | 0.0003 | 2.310  | 0.0214 | 0.2055 | 0.0019 | 1235 | 8  | 1215 | 7  | 1205 | 10 | 102.5 | 1235       | 8  |
| 41 | 41   | 111  | 0.37 | 0.0611 | 0.0003 | 0.8156 | 0.0092 | 0.0969 | 0.0008 | 643  | 11 | 606  | 5  | 596  | 5  | 101.7 | 596        | 5  |
| 42 | 181  | 156  | 1.16 | 0.0974 | 0.0003 | 3.625  | 0.0240 | 0.2702 | 0.0018 | 1574 | 5  | 1555 | 5  | 1542 | 9  | 102.1 | 1574       | 5  |
| 43 | 441  | 258  | 1.71 | 0.1246 | 0.0004 | 5.384  | 0.0418 | 0.3133 | 0.0022 | 2022 | 6  | 1882 | 7  | 1757 | 11 | 115.1 | Discordant |    |
| 44 | 56   | 113  | 0.50 | 0.0670 | 0.0003 | 1.162  | 0.0113 | 0.1257 | 0.0009 | 837  | 9  | 783  | 5  | 764  | 5  | 102.5 | 764        | 5  |
| 45 | 76   | 114  | 0.67 | 0.1055 | 0.0004 | 4.183  | 0.0341 | 0.2875 | 0.0021 | 1723 | 6  | 1671 | 7  | 1629 | 11 | 105.8 | 1723       | 6  |
| 46 | 25   | 105  | 0.23 | 0.0833 | 0.0008 | 2.264  | 0.0447 | 0.1948 | 0.0028 | 1277 | 18 | 1201 | 14 | 1147 | 15 | 111.3 | Discordant |    |
| 47 | 310  | 322  | 0.96 | 0.0562 | 0.0002 | 0.5463 | 0.0050 | 0.0706 | 0.0006 | 461  | 9  | 443  | 3  | 440  | 4  | 100.7 | 440        | 4  |
| 48 | 96   | 97   | 0.99 | 0.0601 | 0.0003 | 0.7883 | 0.0084 | 0.0951 | 0.0007 | 608  | 11 | 590  | 5  | 586  | 4  | 100.7 | 586        | 4  |
| 49 | 1032 | 949  | 1.09 | 0.1331 | 0.0005 | 5.019  | 0.0447 | 0.2733 | 0.0022 | 2139 | 7  | 1823 | 8  | 1558 | 11 | 137.3 | Discordant |    |
| 50 | 1275 | 459  | 2.77 | 0.0844 | 0.0004 | 1.795  | 0.0196 | 0.1542 | 0.0014 | 1301 | 9  | 1044 | 7  | 924  | 8  | 113.0 | Discordant |    |
| 51 | 168  | 181  | 0.93 | 0.0989 | 0.0004 | 3.666  | 0.0303 | 0.2687 | 0.0020 | 1604 | 7  | 1564 | 7  | 1534 | 10 | 104.6 | 1604       | 7  |
| 52 | 65   | 23   | 2.87 | 0.0646 | 0.0006 | 1.061  | 0.0195 | 0.1198 | 0.0014 | 760  | 20 | 735  | 10 | 729  | 8  | 100.8 | 729        | 8  |
| 53 | 211  | 89   | 2.38 | 0.1130 | 0.0005 | 5.100  | 0.0458 | 0.3273 | 0.0029 | 1849 | 7  | 1836 | 8  | 1825 | 14 | 101.3 | 1849       | 7  |
| 54 | 412  | 135  | 3.06 | 0.0863 | 0.0003 | 2.549  | 0.0211 | 0.2143 | 0.0017 | 1344 | 7  | 1286 | 6  | 1252 | 9  | 107.3 | 1344       | 7  |
| 55 | 300  | 248  | 1.21 | 0.0744 | 0.0004 | 1.564  | 0.0186 | 0.1528 | 0.0020 | 1052 | 12 | 956  | 7  | 917  | 11 | 104.3 | 917        | 11 |
| 56 | 275  | 162  | 1.70 | 0.0915 | 0.0004 | 2.688  | 0.0231 | 0.2142 | 0.0023 | 1466 | 9  | 1325 | 6  | 1251 | 12 | 116.4 | Discordant |    |
| 57 | 687  | 348  | 1.98 | 0.0855 | 0.0005 | 2.401  | 0.0320 | 0.2038 | 0.0028 | 1328 | 12 | 1243 | 10 | 1196 | 15 | 111.0 | Discordant |    |
| 58 | 161  | 108  | 1.49 | 0.1016 | 0.0004 | 3.911  | 0.0356 | 0.2792 | 0.0025 | 1653 | 8  | 1616 | 7  | 1587 | 13 | 104.2 | 1653       | 8  |
| 59 | 233  | 108  | 2.15 | 0.0734 | 0.0002 | 1.499  | 0.0095 | 0.1482 | 0.0008 | 1024 | 6  | 930  | 4  | 891  | 4  | 104.4 | 891        | 4  |
| 60 | 187  | 61   | 3.08 | 0.0564 | 0.0003 | 0.5509 | 0.0056 | 0.0709 | 0.0006 | 468  | 10 | 446  | 4  | 442  | 3  | 100.9 | 442        | 3  |

Sample LT22A, quartz arenite, Middle Silurian Yimugantawu Formation in Linkuangchang section of the Kepingtag area of northern Tarim, (Han et al., 2015, Tectonics)

|           |     |     |      |        |        |        |        |        |        |      |     |      |    |      |    |       |            |    |
|-----------|-----|-----|------|--------|--------|--------|--------|--------|--------|------|-----|------|----|------|----|-------|------------|----|
| LT22A-001 | 100 | 58  | 1.74 | 0.0573 | 0.0029 | 0.5280 | 0.0260 | 0.0668 | 0.0012 | 502  | 107 | 430  | 18 | 417  | 7  | 103.1 | 417        | 7  |
| LT22A-002 | 63  | 108 | 0.58 | 0.1107 | 0.0021 | 4.950  | 0.1000 | 0.3243 | 0.0043 | 1811 | 33  | 1811 | 17 | 1811 | 21 | 100.0 | 1811       | 33 |
| LT22A-003 | 114 | 106 | 1.08 | 0.0652 | 0.0018 | 1.140  | 0.0320 | 0.1269 | 0.0018 | 780  | 56  | 773  | 15 | 770  | 10 | 100.4 | 770        | 10 |
| LT22A-004 | 48  | 136 | 0.35 | 0.0577 | 0.0018 | 0.6290 | 0.0200 | 0.0791 | 0.0011 | 517  | 66  | 495  | 13 | 491  | 7  | 100.8 | 491        | 7  |
| LT22A-005 | 47  | 48  | 0.98 | 0.0650 | 0.0037 | 1.183  | 0.0800 | 0.1320 | 0.0024 | 774  | 115 | 793  | 37 | 799  | 14 | 99.2  | 799        | 14 |
| LT22A-006 | 93  | 187 | 0.50 | 0.0658 | 0.0015 | 1.206  | 0.0280 | 0.1330 | 0.0018 | 799  | 46  | 803  | 13 | 805  | 10 | 99.8  | 805        | 10 |
| LT22A-007 | 91  | 181 | 0.50 | 0.0585 | 0.0018 | 0.5530 | 0.0170 | 0.0686 | 0.0010 | 547  | 62  | 447  | 11 | 428  | 6  | 104.4 | 428        | 6  |
| LT22A-008 | 71  | 89  | 0.80 | 0.1028 | 0.0022 | 4.160  | 0.0900 | 0.2936 | 0.0040 | 1675 | 37  | 1666 | 18 | 1659 | 20 | 101.0 | 1675       | 37 |
| LT22A-009 | 177 | 288 | 0.61 | 0.0541 | 0.0014 | 0.5240 | 0.0140 | 0.0702 | 0.0010 | 377  | 56  | 428  | 9  | 437  | 6  | 97.9  | 437        | 6  |
| LT22A-010 | 66  | 115 | 0.58 | 0.1177 | 0.0022 | 5.849  | 0.1150 | 0.3604 | 0.0048 | 1921 | 32  | 1954 | 17 | 1984 | 23 | 96.8  | 1921       | 32 |
| LT22A-011 | 73  | 132 | 0.55 | 0.0532 | 0.0020 | 0.4900 | 0.0180 | 0.0668 | 0.0010 | 337  | 79  | 405  | 12 | 417  | 6  | 97.1  | 417        | 6  |
| LT22A-012 | 156 | 170 | 0.92 | 0.1174 | 0.0021 | 5.655  | 0.1070 | 0.3492 | 0.0046 | 1917 | 31  | 1924 | 16 | 1931 | 22 | 99.3  | 1917       | 31 |
| LT22A-013 | 103 | 161 | 0.64 | 0.1220 | 0.0022 | 6.278  | 0.1190 | 0.3731 | 0.0049 | 1986 | 30  | 2015 | 17 | 2044 | 23 | 97.2  | 1986       | 30 |
| LT22A-014 | 107 | 137 | 0.79 | 0.0679 | 0.0017 | 1.225  | 0.0320 | 0.1308 | 0.0018 | 866  | 50  | 812  | 14 | 792  | 10 | 102.5 | 792        | 10 |
| LT22A-015 | 99  | 84  | 1.17 | 0.0747 | 0.0019 | 2.035  | 0.0530 | 0.1976 | 0.0028 | 1061 | 49  | 1127 | 18 | 1162 | 15 | 91.3  | 1061       | 49 |
| LT22A-016 | 54  | 55  | 0.99 | 0.1168 | 0.0026 | 5.400  | 0.1240 | 0.3354 | 0.0047 | 1908 | 38  | 1885 | 20 | 1864 | 23 | 102.4 | 1908       | 38 |
| LT22A-017 | 202 | 149 | 1.36 | 0.0717 | 0.0017 | 1.593  | 0.0380 | 0.1613 | 0.0022 | 976  | 45  | 968  | 15 | 964  | 12 | 100.4 | 964        | 12 |
| LT22A-018 | 65  | 113 | 0.57 | 0.1127 | 0.0022 | 5.133  | 0.1050 | 0.3304 | 0.0044 | 1843 | 34  | 1842 | 17 | 1840 | 21 | 100.2 | 1843       | 34 |
| LT22A-019 | 74  | 91  | 0.85 | 0.1168 | 0.0023 | 5.625  | 0.1170 | 0.3492 | 0.0047 | 1908 | 34  | 1920 | 18 | 1931 | 23 | 98.8  | 1908       | 34 |
| LT22A-020 | 28  | 36  | 0.67 | 0.1122 | 0.0028 | 5.012  | 0.1290 | 0.3239 | 0.0046 | 1836 | 43  | 1821 | 22 | 1809 | 23 | 101.5 | 1836       | 43 |
| LT22A-021 | 45  | 61  | 0.70 | 0.1530 | 0.0031 | 9.230  | 0.1435 | 0.3835 | 0.0051 | 2381 | 23  | 2385 | 11 | 2395 | 27 | 101.9 | 2381       | 23 |
| LT22A-022 | 45  | 65  | 0.70 | 0.1106 | 0.0024 | 5.090  | 0.1150 | 0.3336 | 0.0047 | 1810 | 38  | 1834 | 19 | 1856 | 23 | 97.5  | 1810       | 38 |
| LT22A-023 | 83  | 502 | 0.17 | 0.0694 | 0.0013 | 1.504  | 0.0300 | 0.1573 | 0.0021 | 909  | 37  | 932  | 12 | 942  | 11 | 98.9  | 942        | 11 |
| LT22A-024 | 36  | 42  | 0.86 | 0.0730 | 0.0027 | 1.505  | 0.0560 | 0.1496 | 0.0024 | 1013 | 72  | 933  | 23 | 899  | 13 | 103.8 | 899        | 13 |
| LT22A-025 | 57  | 138 | 0.41 | 0.0567 | 0.0019 | 0.5650 | 0.0190 | 0.0724 | 0.0011 | 478  | 70  | 455  | 12 | 450  | 6  | 101.1 | 450        | 6  |
| LT22A-026 | 179 | 125 | 1.44 | 0.1269 | 0.0024 | 6.371  | 0.1280 | 0.3640 | 0.0049 | 2056 | 32  | 2028 | 18 | 2001 | 23 | 102.7 | 2056       | 32 |
| LT22A-027 | 101 | 131 | 0.77 | 0.1171 | 0.0023 | 5.768  | 0.1170 | 0.3572 | 0.0048 | 1912 | 33  | 1942 | 18 | 1969 | 23 | 97.1  | 1912       | 33 |
| LT22A-028 | 103 | 142 | 0.73 | 0.0665 | 0.0017 | 1.356  | 0.0350 | 0.1479 | 0.0020 | 822  | 50  | 870  | 15 | 889  | 11 | 97.9  | 889        | 11 |
| LT22A-029 | 76  | 76  | 1.00 | 0.0558 | 0.0026 | 0.5190 | 0.0240 | 0.0674 | 0.0011 | 444  | 97  | 424  | 16 | 421  | 7  | 100.7 | 421        | 7  |
| LT22A-030 | 23  | 93  | 0.25 | 0.0825 | 0.0022 | 2.783  | 0.0730 | 0.2447 | 0.0035 | 1256 | 48  | 1351 | 20 | 1411 | 18 | 89.0  | Discordant |    |
| LT22A-031 | 38  | 86  | 0.44 | 0.0581 | 0.0028 | 0.8600 | 0.0420 | 0.1075 | 0.0019 | 532  | 102 | 630  | 23 | 658  | 11 | 95.7  | 658        | 11 |
| LT22A-032 | 138 | 126 | 1.09 | 0.0579 | 0.0021 | 0.5650 | 0.0200 | 0.0708 | 0.0011 | 524  | 77  | 455  | 13 | 441  | 6  | 100.2 | 441        | 6  |
| LT22A-033 | 75  | 87  | 0.86 | 0.0662 | 0.0021 | 1.204  | 0.0370 | 0.1318 | 0.0019 | 814  | 64  | 802  | 17 | 798  | 11 | 103.5 | 798        | 11 |
| LT22A-034 | 129 | 286 | 0.45 | 0.1499 | 0.0028 | 8.528  | 0.1640 | 0.4127 | 0.0054 | 2344 | 31  | 2289 | 17 | 2227 | 25 | 105.3 | 2344       | 31 |
| LT22A-035 | 22  | 421 | 0.05 | 0.1624 | 0.0029 | 10.385 | 0.1970 | 0.4637 | 0.0060 | 2481 | 30  | 2470 | 18 | 2456 | 27 | 101.0 | 2481       | 30 |
| LT22A-036 | 449 | 555 | 0.81 | 0.0554 | 0.0013 | 0.5480 | 0.0130 | 0.0717 | 0.0010 | 428  | 51  | 444  | 8  | 447  | 6  | 99.3  | 447        | 6  |
| LT22A-037 | 73  | 92  | 0.79 | 0.1211 | 0.0026 | 5.984  | 0.1310 | 0.3582 | 0.0049 | 1973 | 37  | 1973 | 19 | 1974 | 23 | 99.9  | 1973       | 37 |
| LT22A-038 | 74  | 144 | 0.52 | 0.0560 | 0.0019 | 0.5570 | 0.0190 | 0.0721 | 0.0011 | 452  | 75  | 450  | 12 | 449  | 6  | 100.2 | 449        | 6  |
| LT22A-039 | 309 | 257 | 1.20 | 0.0658 | 0.0015 | 1.204  | 0.0290 | 0.1327 | 0.0018 | 800  | 48  | 802  | 13 | 803  | 10 | 99.9  | 803        | 10 |
| LT22A-040 | 80  | 122 | 0.66 | 0.0664 | 0.0019 | 1.186  | 0.0350 | 0.1295 | 0.0019 | 819  | 60  | 794  | 16 | 785  | 11 | 101.1 | 785        | 11 |
| LT22A-041 | 235 | 364 | 0.65 | 0.0583 | 0.0015 | 0.5590 | 0.0150 | 0.0696 | 0.0010 | 541  | 56  | 451  | 10 | 434  | 6  | 103.9 | 434        | 6  |
| LT22A-042 | 29  | 124 | 0.23 | 0.0584 | 0.0022 | 0.5770 | 0.0210 | 0.0717 | 0.0011 | 544  | 81  | 463  | 14 | 446  | 7  | 103.8 | 446        | 7  |
| LT22A-043 | 157 | 138 | 0.49 | 0.1840 | 0.0035 | 13.123 | 0.2630 | 0.5172 | 0.0068 | 2689 | 31  | 2689 | 19 | 2687 | 29 | 100.1 | 2689       | 31 |
| LT22A-044 | 30  | 28  | 1.08 | 0.0715 | 0.0045 | 0.7310 | 0.0450 | 0.0742 | 0.0015 | 972  | 127 | 557  | 26 | 461  | 9  | 120.8 | Discordant |    |
| LT22A-045 | 65  | 79  | 0.82 | 0.1248 | 0.0028 | 6.277  | 0.1440 | 0.3648 | 0.0051 | 2026 | 39  | 2015 | 20 | 2005 | 24 | 101.0 | 2026       | 39 |
| LT22A-046 | 157 | 260 | 0.61 | 0.1192 | 0.0024 | 5.851  | 0.1230 | 0.3560 | 0.0047 | 1944 | 36  | 1954 | 18 | 1963 | 23 | 99.0  | 1944       | 36 |
| LT22A-047 | 190 | 305 | 0.62 | 0.0686 | 0.0016 | 1.332  | 0.0310 | 0.1408 | 0.0019 | 887  | 47  | 860  | 14 | 849  | 11 | 101.3 | 849        | 11 |
| LT22A-048 | 87  | 101 | 0.86 | 0.1105 | 0.0025 | 5.061  | 0.1180 | 0.3321 | 0.0046 | 1808 | 41  | 1830 | 20 | 1849 | 22 | 97.8  | 1808       | 41 |
| LT22A-049 | 88  | 201 | 0.44 | 0.0676 | 0.0017 | 1.294  | 0.0330 | 0.1389 | 0.0019 | 856  | 52  | 843  | 15 | 838  | 11 | 100.6 | 838        | 11 |

|           |     |     |      |        |        |        |        |        |        |      |    |      |    |      |    |       |            |    |
|-----------|-----|-----|------|--------|--------|--------|--------|--------|--------|------|----|------|----|------|----|-------|------------|----|
| LT22A-050 | 472 | 383 | 1.23 | 0.0558 | 0.0015 | 0.5320 | 0.0140 | 0.0691 | 0.0010 | 446  | 59 | 433  | 9  | 431  | 6  | 100.5 | 431        | 6  |
| LT22A-051 | 72  | 127 | 0.57 | 0.0565 | 0.0021 | 0.5330 | 0.0200 | 0.0684 | 0.0010 | 471  | 83 | 433  | 13 | 426  | 6  | 101.6 | 426        | 6  |
| LT22A-052 | 56  | 100 | 0.55 | 0.1097 | 0.0026 | 4.707  | 0.1120 | 0.3111 | 0.0043 | 1795 | 42 | 1768 | 20 | 1746 | 21 | 102.8 | 1795       | 42 |
| LT22A-053 | 45  | 58  | 0.77 | 0.1355 | 0.0032 | 7.730  | 0.1850 | 0.4138 | 0.0059 | 2170 | 40 | 2200 | 22 | 2232 | 27 | 97.2  | 2170       | 40 |
| LT22A-054 | 61  | 69  | 0.89 | 0.1825 | 0.0040 | 12.687 | 0.2870 | 0.5040 | 0.0071 | 2676 | 36 | 2657 | 21 | 2631 | 30 | 101.7 | 2676       | 36 |
| LT22A-055 | 63  | 100 | 0.63 | 0.0669 | 0.0021 | 1.246  | 0.0400 | 0.1350 | 0.0020 | 834  | 66 | 821  | 18 | 817  | 11 | 100.5 | 817        | 11 |
| LT22A-056 | 148 | 118 | 1.25 | 0.0802 | 0.0022 | 1.926  | 0.0530 | 0.1741 | 0.0025 | 1203 | 53 | 1090 | 18 | 1034 | 14 | 116.3 | Discordant |    |
| LT22A-057 | 60  | 152 | 0.39 | 0.0558 | 0.0022 | 0.5380 | 0.0240 | 0.0700 | 0.0011 | 444  | 87 | 437  | 16 | 436  | 6  | 100.2 | 436        | 6  |
| LT22A-058 | 30  | 49  | 0.62 | 0.1091 | 0.0029 | 4.809  | 0.1310 | 0.3196 | 0.0047 | 1784 | 48 | 1786 | 23 | 1788 | 23 | 99.8  | 1784       | 48 |
| LT22A-059 | 134 | 368 | 0.37 | 0.1025 | 0.0023 | 4.149  | 0.0940 | 0.2934 | 0.0040 | 1670 | 40 | 1664 | 18 | 1658 | 20 | 100.7 | 1670       | 40 |
| LT22A-060 | 18  | 46  | 0.38 | 0.1712 | 0.0042 | 10.759 | 0.2670 | 0.4556 | 0.0067 | 2570 | 40 | 2503 | 23 | 2420 | 30 | 106.2 | 2570       | 40 |
| LT22A-061 | 81  | 119 | 0.68 | 0.0690 | 0.0020 | 1.329  | 0.0390 | 0.1396 | 0.0020 | 900  | 59 | 859  | 17 | 843  | 11 | 101.9 | 843        | 11 |
| LT22A-062 | 234 | 280 | 0.84 | 0.1631 | 0.0036 | 10.405 | 0.2340 | 0.4625 | 0.0063 | 2488 | 36 | 2471 | 21 | 2450 | 28 | 101.6 | 2488       | 36 |
| LT22A-063 | 51  | 195 | 0.26 | 0.0730 | 0.0019 | 1.720  | 0.0450 | 0.1708 | 0.0024 | 1015 | 51 | 1016 | 17 | 1016 | 13 | 99.9  | 1015       | 51 |
| LT22A-064 | 316 | 422 | 0.75 | 0.0680 | 0.0017 | 1.289  | 0.0320 | 0.1375 | 0.0019 | 868  | 49 | 841  | 14 | 831  | 11 | 101.2 | 831        | 11 |
| LT22A-065 | 118 | 340 | 0.35 | 0.1206 | 0.0027 | 5.833  | 0.1350 | 0.3506 | 0.0048 | 1966 | 40 | 1951 | 20 | 1937 | 23 | 101.5 | 1966       | 40 |
| LT22A-066 | 36  | 45  | 0.80 | 0.1121 | 0.0031 | 5.070  | 0.1430 | 0.3280 | 0.0050 | 1833 | 50 | 1831 | 24 | 1829 | 24 | 100.2 | 1833       | 50 |
| LT22A-067 | 88  | 274 | 0.32 | 0.1616 | 0.0037 | 10.580 | 0.2460 | 0.4747 | 0.0065 | 2472 | 38 | 2487 | 22 | 2504 | 28 | 98.7  | 2472       | 38 |
| LT22A-068 | 90  | 169 | 0.53 | 0.0601 | 0.0021 | 0.5740 | 0.0200 | 0.0692 | 0.0010 | 607  | 73 | 460  | 13 | 432  | 6  | 106.5 | 432        | 6  |
| LT22A-069 | 75  | 72  | 1.05 | 0.1108 | 0.0029 | 5.115  | 0.1360 | 0.3347 | 0.0049 | 1813 | 47 | 1839 | 23 | 1861 | 23 | 97.4  | 1813       | 47 |
| LT22A-070 | 124 | 207 | 0.60 | 0.0556 | 0.0019 | 0.5480 | 0.0180 | 0.0715 | 0.0011 | 437  | 73 | 444  | 12 | 445  | 6  | 99.8  | 445        | 6  |
| LT22A-071 | 100 | 153 | 0.65 | 0.0641 | 0.0021 | 0.8250 | 0.0270 | 0.0932 | 0.0014 | 746  | 67 | 611  | 15 | 574  | 8  | 106.4 | 574        | 8  |
| LT22A-072 | 4   | 27  | 0.17 | 0.0836 | 0.0036 | 2.216  | 0.0940 | 0.1923 | 0.0034 | 1282 | 82 | 1186 | 30 | 1134 | 18 | 113.1 | Discordant |    |
| LT22A-073 | 192 | 454 | 0.42 | 0.1161 | 0.0028 | 5.393  | 0.1310 | 0.3368 | 0.0046 | 1897 | 42 | 1884 | 21 | 1871 | 22 | 101.4 | 1897       | 42 |
| LT22A-074 | 121 | 233 | 0.52 | 0.0560 | 0.0018 | 0.6000 | 0.0190 | 0.0778 | 0.0011 | 450  | 69 | 477  | 12 | 483  | 7  | 98.8  | 483        | 7  |
| LT22A-075 | 93  | 114 | 0.81 | 0.0563 | 0.0022 | 0.5760 | 0.0230 | 0.0741 | 0.0012 | 465  | 86 | 462  | 15 | 461  | 7  | 100.2 | 461        | 7  |
| LT22A-076 | 63  | 51  | 1.24 | 0.0640 | 0.0027 | 1.136  | 0.0480 | 0.1288 | 0.0021 | 741  | 89 | 771  | 23 | 781  | 12 | 98.7  | 781        | 12 |
| LT22A-077 | 93  | 167 | 0.56 | 0.1188 | 0.0030 | 5.579  | 0.1430 | 0.3404 | 0.0048 | 1938 | 44 | 1913 | 22 | 1889 | 23 | 102.6 | 1938       | 44 |
| LT22A-078 | 57  | 71  | 0.81 | 0.1218 | 0.0033 | 5.690  | 0.1570 | 0.3386 | 0.0050 | 1983 | 48 | 1930 | 24 | 1880 | 24 | 105.5 | 1983       | 48 |
| LT22A-079 | 134 | 255 | 0.53 | 0.1185 | 0.0030 | 5.624  | 0.1440 | 0.3441 | 0.0048 | 1934 | 44 | 1920 | 22 | 1906 | 23 | 101.5 | 1934       | 44 |
| LT22A-080 | 21  | 24  | 0.87 | 0.0790 | 0.0034 | 2.239  | 0.0960 | 0.2053 | 0.0036 | 1173 | 85 | 1193 | 30 | 1204 | 19 | 97.4  | 1173       | 85 |
| LT22A-081 | 80  | 146 | 0.55 | 0.0559 | 0.0022 | 0.5260 | 0.0200 | 0.0683 | 0.0011 | 448  | 84 | 429  | 13 | 426  | 6  | 100.7 | 426        | 6  |
| LT22A-082 | 106 | 373 | 0.28 | 0.0804 | 0.0021 | 2.304  | 0.0610 | 0.2078 | 0.0029 | 1206 | 51 | 1214 | 19 | 1217 | 16 | 99.1  | 1206       | 51 |
| LT22A-083 | 56  | 110 | 0.51 | 0.1468 | 0.0039 | 8.513  | 0.2260 | 0.4203 | 0.0061 | 2309 | 44 | 2287 | 24 | 2262 | 28 | 102.1 | 2309       | 44 |
| LT22A-084 | 400 | 632 | 0.63 | 0.0790 | 0.0021 | 2.080  | 0.0550 | 0.1909 | 0.0027 | 1172 | 51 | 1142 | 18 | 1126 | 15 | 104.1 | 1172       | 51 |
| LT22A-085 | 44  | 138 | 0.32 | 0.0831 | 0.0024 | 2.285  | 0.0670 | 0.1994 | 0.0029 | 1271 | 56 | 1208 | 21 | 1172 | 16 | 108.4 | 1271       | 56 |
| LT22A-086 | 32  | 34  | 0.94 | 0.0722 | 0.0034 | 1.325  | 0.0610 | 0.1330 | 0.0024 | 992  | 93 | 857  | 26 | 805  | 13 | 106.5 | 805        | 13 |
| LT22A-087 | 78  | 175 | 0.44 | 0.1804 | 0.0047 | 11.840 | 0.3140 | 0.4757 | 0.0068 | 2657 | 43 | 2592 | 25 | 2509 | 30 | 105.9 | 2657       | 43 |
| LT22A-088 | 257 | 566 | 0.45 | 0.0584 | 0.0017 | 0.6880 | 0.0200 | 0.0854 | 0.0012 | 543  | 62 | 531  | 12 | 529  | 7  | 100.4 | 529        | 7  |
| LT22A-089 | 35  | 69  | 0.50 | 0.1271 | 0.0037 | 6.524  | 0.1890 | 0.3722 | 0.0056 | 2058 | 50 | 2049 | 25 | 2040 | 26 | 100.9 | 2058       | 50 |
| LT22A-090 | 55  | 48  | 1.15 | 0.1232 | 0.0038 | 5.912  | 0.1810 | 0.3479 | 0.0054 | 2003 | 53 | 1963 | 27 | 1925 | 26 | 104.1 | 2003       | 53 |
| LT22A-091 | 46  | 71  | 0.64 | 0.1230 | 0.0036 | 5.921  | 0.1730 | 0.3490 | 0.0052 | 2000 | 51 | 1964 | 25 | 1930 | 25 | 103.6 | 2000       | 51 |
| LT22A-092 | 92  | 194 | 0.47 | 0.0676 | 0.0021 | 1.286  | 0.0410 | 0.1380 | 0.0021 | 855  | 64 | 840  | 18 | 833  | 12 | 100.8 | 833        | 12 |

Sample YM2-3, sandstone, Early Silurian Kepingtage Formation in Tabei uplift of northern Tarim, (Dong et al., 2016, *Journal of Asian Earth Sciences*)

|       |      |      |      |        |        |        |        |        |        |      |     |      |    |      |    |       |            |    |
|-------|------|------|------|--------|--------|--------|--------|--------|--------|------|-----|------|----|------|----|-------|------------|----|
| D7-1  | 231  | 119  | 0.51 | 0.0683 | 0.0026 | 1.260  | 0.0443 | 0.1343 | 0.0029 | 879  | 39  | 828  | 20 | 812  | 17 | 102.0 | 812        | 17 |
| D7-2  | 129  | 79   | 0.61 | 0.0713 | 0.0030 | 1.331  | 0.0510 | 0.1360 | 0.0032 | 966  | 41  | 859  | 22 | 822  | 18 | 104.5 | 822        | 18 |
| D7-3  | 94   | 86   | 0.91 | 0.1137 | 0.0032 | 4.964  | 0.1298 | 0.3181 | 0.0068 | 1859 | 21  | 1813 | 22 | 1781 | 33 | 104.4 | 1859       | 21 |
| D7-4  | 78   | 42   | 0.54 | 0.1086 | 0.0034 | 5.051  | 0.1476 | 0.3388 | 0.0078 | 1776 | 25  | 1828 | 25 | 1881 | 38 | 94.4  | 1776       | 25 |
| D7-5  | 304  | 368  | 1.21 | 0.1658 | 0.0020 | 10.882 | 0.1267 | 0.4781 | 0.0065 | 2515 | 10  | 2513 | 11 | 2519 | 28 | 99.8  | 2515       | 10 |
| D7-6  | 288  | 230  | 0.80 | 0.1128 | 0.0019 | 5.176  | 0.0803 | 0.3341 | 0.0049 | 1845 | 13  | 1849 | 13 | 1858 | 24 | 99.3  | 1845       | 13 |
| D7-7  | 142  | 198  | 1.39 | 0.1076 | 0.0025 | 4.871  | 0.1048 | 0.3298 | 0.0060 | 1759 | 18  | 1797 | 18 | 1837 | 29 | 95.8  | 1759       | 18 |
| D7-8  | 483  | 309  | 0.64 | 0.1189 | 0.0017 | 5.384  | 0.0695 | 0.3299 | 0.0044 | 1939 | 11  | 1882 | 11 | 1838 | 22 | 105.5 | 1939       | 11 |
| D7-9  | 707  | 648  | 0.92 | 0.0586 | 0.0015 | 0.7428 | 0.0174 | 0.0923 | 0.0014 | 553  | 26  | 564  | 10 | 569  | 8  | 99.1  | 569        | 8  |
| D7-10 | 160  | 74   | 0.46 | 0.1699 | 0.0028 | 11.828 | 0.1864 | 0.5069 | 0.0084 | 2557 | 12  | 2591 | 15 | 2644 | 36 | 96.7  | 2557       | 12 |
| D7-11 | 86   | 82   | 0.96 | 0.1083 | 0.0034 | 4.840  | 0.1389 | 0.3253 | 0.0074 | 1772 | 24  | 1792 | 24 | 1816 | 36 | 97.6  | 1772       | 24 |
| D7-12 | 251  | 224  | 0.89 | 0.0784 | 0.0023 | 1.974  | 0.0539 | 0.1834 | 0.0035 | 1157 | 27  | 1107 | 18 | 1086 | 19 | 106.5 | 1157       | 27 |
| D7-13 | 48   | 53   | 1.11 | 0.1193 | 0.0048 | 5.438  | 0.2008 | 0.3319 | 0.0097 | 1946 | 30  | 1891 | 32 | 1847 | 47 | 105.4 | 1946       | 30 |
| D7-14 | 145  | 78   | 0.53 | 0.1113 | 0.0026 | 5.019  | 0.1093 | 0.3284 | 0.0061 | 1820 | 18  | 1823 | 18 | 1830 | 29 | 99.5  | 1820       | 18 |
| D7-15 | 194  | 264  | 1.37 | 0.1143 | 0.0027 | 5.410  | 0.1162 | 0.3445 | 0.0063 | 1869 | 17  | 1886 | 18 | 1908 | 30 | 98.0  | 1869       | 17 |
| D7-16 | 88   | 54   | 0.61 | 0.1138 | 0.0035 | 5.231  | 0.1493 | 0.3347 | 0.0077 | 1861 | 24  | 1858 | 24 | 1861 | 37 | 100.0 | 1861       | 24 |
| D7-17 | 160  | 207  | 1.29 | 0.1132 | 0.0027 | 4.985  | 0.1074 | 0.3207 | 0.0059 | 1851 | 17  | 1817 | 18 | 1793 | 29 | 103.2 | 1851       | 17 |
| D7-18 | 310  | 155  | 0.50 | 0.1138 | 0.0021 | 5.053  | 0.0837 | 0.3232 | 0.0050 | 1861 | 13  | 1828 | 14 | 1805 | 24 | 103.1 | 1861       | 13 |
| D7-19 | 281  | 267  | 0.95 | 0.0684 | 0.0025 | 1.282  | 0.0434 | 0.1365 | 0.0029 | 880  | 37  | 838  | 19 | 825  | 16 | 101.6 | 825        | 16 |
| D7-20 | 106  | 70   | 0.66 | 0.0677 | 0.0042 | 1.270  | 0.0713 | 0.1365 | 0.0044 | 860  | 65  | 832  | 32 | 825  | 25 | 100.8 | 825        | 25 |
| D7-21 | 238  | 233  | 0.98 | 0.1182 | 0.0022 | 5.787  | 0.0979 | 0.3564 | 0.0056 | 1929 | 14  | 1944 | 15 | 1965 | 27 | 98.2  | 1929       | 14 |
| D7-22 | 169  | 149  | 0.88 | 0.0685 | 0.0030 | 1.246  | 0.0492 | 0.1323 | 0.0031 | 884  | 44  | 821  | 22 | 801  | 18 | 102.5 | 801        | 18 |
| D7-23 | 215  | 158  | 0.73 | 0.0734 | 0.0028 | 1.365  | 0.0481 | 0.1354 | 0.0030 | 1024 | 37  | 874  | 21 | 819  | 17 | 106.7 | 819        | 17 |
| D7-24 | 205  | 80   | 0.39 | 0.1250 | 0.0026 | 6.551  | 0.1258 | 0.3813 | 0.0067 | 2029 | 15  | 2053 | 17 | 2082 | 31 | 97.5  | 2029       | 15 |
| D7-25 | 70   | 51   | 0.73 | 0.0686 | 0.0042 | 1.722  | 0.0982 | 0.1827 | 0.0059 | 885  | 66  | 1017 | 37 | 1082 | 32 | 81.8  | Discordant |    |
| D7-26 | 703  | 378  | 0.54 | 0.0669 | 0.0016 | 1.306  | 0.0290 | 0.1420 | 0.0022 | 834  | 23  | 848  | 13 | 856  | 12 | 99.1  | 856        | 12 |
| D7-27 | 158  | 150  | 0.95 | 0.1182 | 0.0031 | 5.259  | 0.1246 | 0.3238 | 0.0065 | 1929 | 19  | 1862 | 20 | 1808 | 32 | 106.7 | 1929       | 19 |
| D7-28 | 284  | 184  | 0.65 | 0.0640 | 0.0028 | 1.113  | 0.0451 | 0.1266 | 0.0030 | 741  | 47  | 760  | 22 | 768  | 17 | 99.0  | 768        | 17 |
| D7-29 | 75   | 41   | 0.54 | 0.0721 | 0.0090 | 1.347  | 0.1532 | 0.1359 | 0.0087 | 990  | 131 | 866  | 66 | 821  | 49 | 105.5 | 821        | 49 |
| D7-30 | 56   | 28   | 0.50 | 0.0657 | 0.0064 | 1.105  | 0.0994 | 0.1223 | 0.0057 | 797  | 113 | 756  | 48 | 744  | 33 | 101.6 | 744        | 33 |
| D7-31 | 86   | 62   | 0.71 | 0.1147 | 0.0035 | 5.266  | 0.1466 | 0.3339 | 0.0076 | 1875 | 23  | 1863 | 24 | 1857 | 37 | 101.0 | 1875       | 23 |
| D7-32 | 155  | 162  | 1.04 | 0.1158 | 0.0029 | 5.741  | 0.1313 | 0.3607 | 0.0071 | 1892 | 18  | 1938 | 20 | 1985 | 33 | 95.3  | 1892       | 18 |
| D7-33 | 468  | 411  | 0.88 | 0.0689 | 0.0019 | 1.294  | 0.0325 | 0.1366 | 0.0023 | 895  | 26  | 843  | 14 | 826  | 13 | 102.1 | 826        | 13 |
| D7-34 | 994  | 148  | 0.15 | 0.0811 | 0.0014 | 2.238  | 0.0364 | 0.2008 | 0.0028 | 1223 | 14  | 1193 | 11 | 1180 | 15 | 103.6 | 1223       | 14 |
| D7-35 | 469  | 267  | 0.57 | 0.0669 | 0.0018 | 1.341  | 0.0326 | 0.1459 | 0.0024 | 833  | 25  | 864  | 14 | 878  | 14 | 98.4  | 878        | 14 |
| D7-36 | 257  | 233  | 0.90 | 0.0623 | 0.0031 | 0.6494 | 0.0295 | 0.0758 | 0.0019 | 684  | 55  | 508  | 18 | 471  | 11 | 107.9 | 471        | 11 |
| D7-37 | 111  | 106  | 0.95 | 0.1097 | 0.0031 | 4.992  | 0.1321 | 0.3309 | 0.0071 | 1794 | 22  | 1818 | 22 | 1843 | 34 | 97.3  | 1794       | 22 |
| D7-38 | 198  | 114  | 0.58 | 0.1129 | 0.0024 | 5.174  | 0.1016 | 0.3334 | 0.0058 | 1846 | 16  | 1848 | 17 | 1855 | 28 | 99.5  | 1846       | 16 |
| D7-39 | 458  | 410  | 0.90 | 0.1647 | 0.0021 | 10.559 | 0.1259 | 0.4663 | 0.0064 | 2504 | 10  | 2485 | 11 | 2467 | 28 | 101.5 | 2504       | 10 |
| D7-40 | 161  | 125  | 0.77 | 0.0644 | 0.0036 | 1.177  | 0.0598 | 0.1329 | 0.0039 | 754  | 59  | 790  | 28 | 804  | 22 | 98.3  | 804        | 22 |
| D7-41 | 285  | 272  | 0.95 | 0.0569 | 0.0028 | 0.5470 | 0.0249 | 0.0699 | 0.0017 | 487  | 58  | 443  | 16 | 436  | 10 | 101.6 | 436        | 10 |
| D7-42 | 782  | 238  | 0.31 | 0.0686 | 0.0014 | 1.323  | 0.0251 | 0.1401 | 0.0020 | 887  | 18  | 856  | 11 | 845  | 11 | 101.3 | 845        | 11 |
| D7-43 | 119  | 102  | 0.86 | 0.1690 | 0.0035 | 11.142 | 0.2163 | 0.4793 | 0.0093 | 2548 | 15  | 2535 | 18 | 2524 | 40 | 101.0 | 2548       | 15 |
| D7-44 | 996  | 451  | 0.45 | 0.0583 | 0.0018 | 0.5814 | 0.0162 | 0.0726 | 0.0012 | 539  | 33  | 465  | 10 | 452  | 7  | 102.9 | 452        | 7  |
| D7-45 | 38   | 9    | 0.24 | 0.1759 | 0.0047 | 12.941 | 0.5174 | 0.5348 | 0.0198 | 2615 | 30  | 2675 | 38 | 2762 | 83 | 94.7  | 2615       | 30 |
| D7-46 | 206  | 83   | 0.40 | 0.1183 | 0.0028 | 5.412  | 0.1166 | 0.3326 | 0.0062 | 1930 | 17  | 1887 | 18 | 1851 | 30 | 104.3 | 1930       | 17 |
| D7-47 | 364  | 353  | 0.97 | 0.0782 | 0.0019 | 2.155  | 0.0491 | 0.2002 | 0.0033 | 1153 | 20  | 1167 | 15 | 1177 | 18 | 98.0  | 1153       | 20 |
| D7-48 | 252  | 222  | 0.88 | 0.1060 | 0.0023 | 4.583  | 0.0930 | 0.3142 | 0.0054 | 1732 | 17  | 1746 | 17 | 1761 | 27 | 98.4  | 1732       | 17 |
| D7-49 | 560  | 379  | 0.68 | 0.3148 | 0.0033 | 33.039 | 0.3523 | 0.7628 | 0.0107 | 3544 | 10  | 3582 | 11 | 3654 | 39 | 97.0  | 3544       | 10 |
| D7-50 | 169  | 293  | 1.73 | 0.0676 | 0.0035 | 1.193  | 0.0560 | 0.1282 | 0.0035 | 857  | 53  | 797  | 26 | 777  | 20 | 102.6 | 777        | 20 |
| D7-51 | 315  | 195  | 0.62 | 0.0686 | 0.0026 | 1.283  | 0.0439 | 0.1358 | 0.0029 | 888  | 37  | 838  | 20 | 821  | 16 | 102.1 | 821        | 16 |
| D7-52 | 189  | 126  | 0.67 | 0.1518 | 0.0034 | 9.814  | 0.2056 | 0.4698 | 0.0094 | 2366 | 16  | 2417 | 19 | 2483 | 41 | 95.3  | 2366       | 16 |
| D7-53 | 119  | 93   | 0.78 | 0.1242 | 0.0043 | 6.341  | 0.2027 | 0.3708 | 0.0098 | 2018 | 26  | 2024 | 28 | 2033 | 46 | 99.3  | 2018       | 26 |
| D7-54 | 669  | 396  | 0.59 | 0.0667 | 0.0020 | 1.318  | 0.0370 | 0.1436 | 0.0026 | 828  | 30  | 854  | 16 | 865  | 15 | 98.7  | 865        | 15 |
| D7-55 | 374  | 165  | 0.44 | 0.1169 | 0.0048 | 6.155  | 0.2339 | 0.3825 | 0.0116 | 1910 | 31  | 1998 | 33 | 2088 | 54 | 91.5  | 1910       | 31 |
| D7-56 | 161  | 95   | 0.59 | 0.1158 | 0.0051 | 5.527  | 0.2244 | 0.3468 | 0.0111 | 1892 | 34  | 1905 | 35 | 1919 | 53 | 98.6  | 1892       | 34 |
| D7-57 | 433  | 305  | 0.70 | 0.0614 | 0.0031 | 1.259  | 0.0586 | 0.1489 | 0.0040 | 655  | 56  | 827  | 26 | 895  | 22 | 92.4  | 895        | 22 |
| D7-58 | 1216 | 1176 | 0.97 | 0.0671 | 0.0022 | 1.370  | 0.0420 | 0.1484 | 0.0029 | 841  | 33  | 876  | 18 | 892  | 16 | 98.2  | 892        | 16 |
| D7-59 | 810  | 354  | 0.44 | 0.0594 | 0.0041 | 0.6455 | 0.0405 | 0.0790 | 0.0026 | 581  | 81  | 506  | 25 | 490  | 15 | 103.3 | 490        | 15 |
| D7-60 | 117  | 103  | 0.89 | 0.1230 | 0.0089 | 6.534  | 0.4369 | 0.3859 | 0.0204 | 2000 | 55  | 2051 | 59 | 2104 | 95 | 95.1  | 2000       | 55 |
| D7-61 | 870  | 344  | 0.40 | 0.0556 | 0.0037 | 0.5904 | 0.0361 | 0.0771 | 0.0024 | 438  | 82  | 471  | 23 | 479  | 14 | 98.3  | 479        | 14 |
| D7-62 | 116  | 91   | 0.78 | 0.1186 | 0.0033 | 5.206  | 0.1311 | 0.3187 | 0.0067 | 1936 | 20  | 1854 | 21 | 1783 | 33 | 108.6 | 1936       | 20 |
| D7-63 | 48   | 42   | 0.87 | 0.1084 | 0.0047 | 4.614  | 0.1851 | 0.3091 | 0.0093 | 1773 | 34  | 1752 | 33 | 1736 | 46 | 102.1 | 1773       | 34 |
| D7-64 | 372  | 246  | 0.66 | 0.1636 | 0.0022 | 10.540 | 0.1309 | 0.4679 | 0.0066 | 2493 | 11  | 2483 | 12 | 2474 | 29 | 100.8 | 2493       | 11 |
| D7-65 | 658  | 400  | 0.61 | 0.0662 | 0.0016 | 1.262  | 0.0279 | 0.1385 | 0.0021 | 811  | 23  | 829  | 13 | 836  | 12 | 99.2  | 836        | 12 |
| D7-66 | 242  | 164  | 0.68 | 0.1522 | 0.0026 | 8.954  | 0.1424 | 0.4271 | 0.0069 | 2371 | 13  | 2333 | 15 | 2293 | 31 | 103.4 | 2371       | 13 |
| D7-67 | 207  | 112  | 0.54 | 0.0642 | 0.0030 | 1.186  | 0.0511 | 0.1340 | 0.0033 | 749  | 51  | 794  | 24 | 811  | 19 | 97.9  | 811        | 19 |
| D7-68 | 298  | 95   | 0.32 | 0.1110 | 0.0019 | 5.025  | 0.0803 | 0.3286 | 0.0049 | 1817 | 13  | 1824 | 14 | 1831 | 24 | 99.2  | 1817       | 13 |
| D7-69 | 73   | 57   | 0.78 | 0.1143 | 0.0039 | 5.027  | 0.1566 | 0.3194 | 0.0079 | 1868 | 26  | 1824 | 26 | 1787 | 39 | 104.5 | 1868       | 26 |
| D7-70 | 67   | 64   | 0.96 | 0.1109 | 0.0039 | 5.024  | 0.1633 | 0.3290 | 0.0084 | 1814 | 27  | 1823 | 28 | 1833 | 41 | 99.0  | 1814       | 27 |
| D7-71 | 176  | 213  | 1.21 | 0.0680 | 0.0030 | 1.235  | 0.0493 | 0.1319 | 0.0031 | 867  | 46  | 816  | 22 | 799  | 17 | 102.1 | 799        | 17 |

|        |      |     |      |        |        |        |        |        |        |      |     |      |    |      |    |       |            |    |
|--------|------|-----|------|--------|--------|--------|--------|--------|--------|------|-----|------|----|------|----|-------|------------|----|
| D7-75  | 32   | 29  | 0.90 | 0.0680 | 0.0083 | 1.221  | 0.1378 | 0.1304 | 0.0072 | 867  | 144 | 810  | 63 | 790  | 41 | 102.5 | 790        | 41 |
| D7-76  | 249  | 124 | 0.50 | 0.0663 | 0.0025 | 1.155  | 0.0402 | 0.1264 | 0.0027 | 816  | 39  | 779  | 22 | 767  | 15 | 101.6 | 767        | 15 |
| D7-77  | 580  | 762 | 1.32 | 0.0687 | 0.0017 | 1.490  | 0.0331 | 0.1573 | 0.0025 | 890  | 22  | 926  | 13 | 942  | 14 | 98.3  | 942        | 14 |
| D7-78  | 77   | 56  | 0.73 | 0.1101 | 0.0043 | 5.191  | 0.1875 | 0.3422 | 0.0095 | 1801 | 31  | 1851 | 31 | 1897 | 46 | 94.9  | 1801       | 31 |
| D7-79  | 53   | 55  | 1.04 | 0.1155 | 0.0045 | 4.997  | 0.1762 | 0.3139 | 0.0087 | 1888 | 29  | 1819 | 30 | 1760 | 43 | 107.3 | 1888       | 29 |
| D7-80  | 41   | 24  | 0.59 | 0.1645 | 0.0062 | 9.182  | 0.3197 | 0.4051 | 0.0127 | 2502 | 26  | 2356 | 32 | 2192 | 58 | 114.1 | Discordant |    |
| D7-81  | 512  | 374 | 0.73 | 0.0681 | 0.0016 | 1.284  | 0.0283 | 0.1368 | 0.0021 | 871  | 22  | 838  | 13 | 827  | 12 | 101.3 | 827        | 12 |
| D7-82  | 177  | 182 | 1.03 | 0.1142 | 0.0026 | 4.891  | 0.1022 | 0.3107 | 0.0056 | 1867 | 17  | 1801 | 18 | 1744 | 27 | 107.1 | 1867       | 17 |
| D7-83  | 115  | 148 | 1.28 | 0.1063 | 0.0033 | 4.505  | 0.1282 | 0.3075 | 0.0069 | 1736 | 24  | 1732 | 24 | 1729 | 34 | 100.4 | 1736       | 24 |
| D7-84  | 437  | 215 | 0.49 | 0.1665 | 0.0019 | 11.100 | 0.1210 | 0.4838 | 0.0063 | 2522 | 10  | 2532 | 10 | 2544 | 27 | 99.1  | 2522       | 10 |
| D7-85  | 257  | 214 | 0.83 | 0.0644 | 0.0022 | 1.174  | 0.0372 | 0.1321 | 0.0026 | 756  | 36  | 788  | 17 | 800  | 15 | 98.5  | 800        | 15 |
| D7-86  | 247  | 163 | 0.66 | 0.1276 | 0.0023 | 6.383  | 0.1064 | 0.3629 | 0.0058 | 2065 | 13  | 2030 | 15 | 1996 | 27 | 103.5 | 2065       | 13 |
| D7-87  | 43   | 52  | 1.20 | 0.1114 | 0.0050 | 4.701  | 0.1920 | 0.3061 | 0.0095 | 1822 | 35  | 1767 | 34 | 1722 | 47 | 105.8 | 1822       | 35 |
| D7-88  | 90   | 103 | 1.14 | 0.0681 | 0.0041 | 1.177  | 0.0653 | 0.1254 | 0.0039 | 871  | 66  | 790  | 30 | 762  | 22 | 103.7 | 762        | 22 |
| D7-89  | 160  | 130 | 0.81 | 0.1129 | 0.0026 | 4.840  | 0.1030 | 0.3109 | 0.0057 | 1847 | 17  | 1792 | 18 | 1745 | 28 | 105.8 | 1847       | 17 |
| D7-90  | 376  | 337 | 0.90 | 0.0562 | 0.0025 | 0.5389 | 0.0217 | 0.0696 | 0.0015 | 459  | 52  | 438  | 14 | 434  | 9  | 100.9 | 434        | 9  |
| D7-91  | 330  | 508 | 1.54 | 0.0624 | 0.0020 | 1.063  | 0.0318 | 0.1235 | 0.0023 | 687  | 34  | 735  | 16 | 751  | 13 | 97.9  | 751        | 13 |
| D7-92  | 69   | 50  | 0.72 | 0.1106 | 0.0041 | 4.667  | 0.1582 | 0.3061 | 0.0081 | 1809 | 29  | 1761 | 28 | 1721 | 40 | 105.1 | 1809       | 29 |
| D7-93  | 76   | 52  | 0.68 | 0.1195 | 0.0040 | 5.137  | 0.1578 | 0.3116 | 0.0077 | 1949 | 25  | 1842 | 26 | 1749 | 38 | 111.4 | Discordant |    |
| D7-94  | 993  | 285 | 0.29 | 0.0744 | 0.0021 | 1.871  | 0.0459 | 0.1825 | 0.0025 | 1052 | 58  | 1071 | 16 | 1081 | 14 | 97.3  | 1052       | 58 |
| D7-95  | 38   | 12  | 0.32 | 0.0547 | 0.0058 | 0.8832 | 0.0856 | 0.1171 | 0.0058 | 399  | 130 | 643  | 46 | 714  | 34 | 90.1  | 714        | 34 |
| D7-96  | 192  | 151 | 0.79 | 0.1114 | 0.0024 | 4.858  | 0.0970 | 0.3162 | 0.0055 | 1823 | 16  | 1795 | 17 | 1771 | 27 | 102.9 | 1823       | 16 |
| D7-97  | 170  | 224 | 1.32 | 0.0798 | 0.0033 | 1.391  | 0.0521 | 0.1263 | 0.0031 | 1193 | 38  | 885  | 19 | 767  | 18 | 115.4 | Discordant |    |
| D7-98  | 214  | 235 | 1.10 | 0.1626 | 0.0028 | 10.249 | 0.1652 | 0.4569 | 0.0076 | 2483 | 13  | 2457 | 15 | 2426 | 34 | 102.3 | 2483       | 13 |
| D7-99  | 399  | 237 | 0.59 | 0.0697 | 0.0021 | 1.438  | 0.0403 | 0.1495 | 0.0028 | 919  | 29  | 905  | 17 | 898  | 15 | 100.8 | 898        | 15 |
| D7-100 | 408  | 368 | 0.90 | 0.0637 | 0.0021 | 1.134  | 0.0338 | 0.1289 | 0.0024 | 733  | 33  | 769  | 16 | 782  | 14 | 98.3  | 782        | 14 |
| D7-101 | 95   | 58  | 0.61 | 0.1124 | 0.0035 | 4.524  | 0.1281 | 0.2918 | 0.0066 | 1838 | 23  | 1735 | 24 | 1650 | 33 | 111.4 | Discordant |    |
| D7-102 | 183  | 105 | 0.58 | 0.1289 | 0.0025 | 6.708  | 0.1197 | 0.3770 | 0.0063 | 2084 | 14  | 2074 | 16 | 2062 | 30 | 101.1 | 2084       | 14 |
| D7-103 | 78   | 107 | 1.38 | 0.1088 | 0.0037 | 4.549  | 0.1406 | 0.3030 | 0.0073 | 1780 | 26  | 1740 | 26 | 1706 | 36 | 104.3 | 1780       | 26 |
| D7-104 | 67   | 68  | 1.01 | 0.1544 | 0.0044 | 8.986  | 0.2396 | 0.4217 | 0.0103 | 2395 | 20  | 2337 | 24 | 2268 | 47 | 105.6 | 2395       | 20 |
| D7-105 | 81   | 144 | 1.79 | 0.1212 | 0.0038 | 5.462  | 0.1570 | 0.3267 | 0.0077 | 1974 | 23  | 1895 | 25 | 1822 | 37 | 108.3 | 1974       | 23 |
| D7-106 | 56   | 41  | 0.74 | 0.1029 | 0.0044 | 4.308  | 0.1690 | 0.3034 | 0.0086 | 1677 | 35  | 1695 | 32 | 1708 | 43 | 98.2  | 1677       | 35 |
| D7-107 | 410  | 198 | 0.48 | 0.0682 | 0.0019 | 1.216  | 0.0307 | 0.1252 | 0.0022 | 873  | 26  | 808  | 14 | 784  | 13 | 103.1 | 784        | 13 |
| D7-108 | 827  | 277 | 0.33 | 0.0657 | 0.0016 | 1.232  | 0.0277 | 0.1358 | 0.0021 | 798  | 24  | 815  | 13 | 821  | 12 | 99.3  | 821        | 12 |
| D7-109 | 134  | 100 | 0.74 | 0.0660 | 0.0032 | 1.169  | 0.0527 | 0.1284 | 0.0033 | 805  | 53  | 786  | 25 | 779  | 19 | 100.9 | 779        | 19 |
| D7-110 | 82   | 72  | 0.87 | 0.1120 | 0.0037 | 4.855  | 0.1480 | 0.3139 | 0.0076 | 1833 | 25  | 1794 | 26 | 1760 | 37 | 104.1 | 1833       | 25 |
| D7-111 | 374  | 205 | 0.55 | 0.0652 | 0.0019 | 1.187  | 0.0322 | 0.1319 | 0.0023 | 780  | 29  | 794  | 15 | 799  | 13 | 99.4  | 799        | 13 |
| D7-112 | 352  | 178 | 0.51 | 0.1514 | 0.0020 | 8.807  | 0.1097 | 0.4214 | 0.0058 | 2362 | 10  | 2318 | 11 | 2267 | 26 | 104.2 | 2362       | 10 |
| D7-113 | 279  | 171 | 0.61 | 0.1612 | 0.0023 | 9.826  | 0.1332 | 0.4416 | 0.0065 | 2468 | 11  | 2419 | 12 | 2358 | 29 | 104.7 | 2468       | 11 |
| D7-114 | 116  | 146 | 1.26 | 0.1210 | 0.0032 | 5.557  | 0.1327 | 0.3327 | 0.0068 | 1971 | 19  | 1909 | 21 | 1852 | 33 | 106.4 | 1971       | 19 |
| D7-115 | 203  | 130 | 0.64 | 0.1450 | 0.0026 | 8.467  | 0.1435 | 0.4229 | 0.0070 | 2288 | 13  | 2282 | 15 | 2274 | 32 | 100.6 | 2288       | 13 |
| D7-116 | 30   | 33  | 1.10 | 0.0558 | 0.0084 | 1.001  | 0.1437 | 0.1299 | 0.0070 | 445  | 223 | 704  | 73 | 787  | 40 | 89.5  | Discordant |    |
| D7-117 | 1562 | 678 | 0.43 | 0.0663 | 0.0022 | 1.149  | 0.0355 | 0.1258 | 0.0017 | 816  | 72  | 777  | 17 | 764  | 10 | 101.7 | 764        | 10 |
| D7-118 | 99   | 59  | 0.60 | 0.1126 | 0.0036 | 4.767  | 0.1389 | 0.3065 | 0.0071 | 1842 | 24  | 1779 | 24 | 1724 | 35 | 106.8 | 1842       | 24 |
| D7-119 | 62   | 32  | 0.51 | 0.1098 | 0.0047 | 4.673  | 0.1820 | 0.3082 | 0.0091 | 1796 | 33  | 1762 | 33 | 1732 | 45 | 103.7 | 1796       | 33 |
| D7-120 | 215  | 88  | 0.41 | 0.1282 | 0.0026 | 6.310  | 0.1182 | 0.3566 | 0.0062 | 2073 | 15  | 2020 | 16 | 1966 | 29 | 105.4 | 2073       | 15 |

Sample 09MHL16, sandstone, Early Silurian, in Quruqtagh of northern Tarim, (Zhang et al., 2014, Acta Geologica Sinica)

|    |     |     |      |        |        |        |        |        |        |      |    |      |    |      |    |       |            |   |
|----|-----|-----|------|--------|--------|--------|--------|--------|--------|------|----|------|----|------|----|-------|------------|---|
| 1  | 246 | 120 | 2.04 | 0.0559 | 0.0003 | 0.6917 | 0.0072 | 0.0898 | 0.0007 | 447  | 11 | 534  | 4  | 554  | 4  | 96.4  | 554        | 4 |
| 2  | 171 | 130 | 1.32 | 0.0646 | 0.0002 | 1.083  | 0.0085 | 0.1217 | 0.0009 | 761  | 8  | 745  | 4  | 740  | 5  | 100.7 | 740        | 5 |
| 3  | 170 | 86  | 1.97 | 0.1255 | 0.0004 | 6.533  | 0.0521 | 0.3773 | 0.0028 | 2036 | 7  | 2050 | 7  | 2064 | 13 | 98.6  | 2036       | 7 |
| 4  | 171 | 198 | 0.86 | 0.0674 | 0.0003 | 1.202  | 0.0119 | 0.1292 | 0.0009 | 850  | 11 | 801  | 5  | 783  | 5  | 102.3 | 783        | 5 |
| 5  | 131 | 122 | 1.08 | 0.0626 | 0.0003 | 1.109  | 0.0115 | 0.1284 | 0.0013 | 695  | 10 | 757  | 6  | 779  | 7  | 97.2  | 779        | 7 |
| 7  | 301 | 235 | 1.28 | 0.0647 | 0.0002 | 1.166  | 0.0097 | 0.1306 | 0.0010 | 765  | 8  | 785  | 5  | 791  | 6  | 99.2  | 791        | 6 |
| 8  | 218 | 134 | 1.63 | 0.0635 | 0.0002 | 1.086  | 0.0096 | 0.1240 | 0.0010 | 726  | 9  | 746  | 5  | 753  | 6  | 99.1  | 753        | 6 |
| 9  | 356 | 338 | 1.05 | 0.0704 | 0.0003 | 1.261  | 0.0083 | 0.1302 | 0.0010 | 941  | 8  | 828  | 4  | 789  | 6  | 104.9 | 789        | 6 |
| 10 | 100 | 440 | 0.23 | 0.1301 | 0.0006 | 6.523  | 0.0603 | 0.3637 | 0.0035 | 2099 | 8  | 2049 | 8  | 1999 | 17 | 105.0 | 2099       | 8 |
| 11 | 235 | 329 | 0.71 | 0.0695 | 0.0004 | 1.290  | 0.0159 | 0.1344 | 0.0010 | 913  | 14 | 841  | 7  | 813  | 6  | 103.4 | 813        | 6 |
| 12 | 131 | 131 | 1.00 | 0.0640 | 0.0003 | 1.100  | 0.0100 | 0.1247 | 0.0011 | 741  | 9  | 753  | 5  | 757  | 6  | 99.5  | 757        | 6 |
| 13 | 121 | 241 | 0.50 | 0.0787 | 0.0003 | 2.212  | 0.0190 | 0.2038 | 0.0018 | 1165 | 8  | 1185 | 6  | 1195 | 10 | 97.5  | 1165       | 8 |
| 14 | 312 | 499 | 0.63 | 0.1094 | 0.0004 | 4.484  | 0.0355 | 0.2972 | 0.0025 | 1789 | 7  | 1728 | 7  | 1678 | 12 | 106.6 | 1789       | 7 |
| 15 | 648 | 687 | 0.94 | 0.0743 | 0.0003 | 1.320  | 0.0115 | 0.1287 | 0.0010 | 1048 | 8  | 854  | 5  | 781  | 6  | 109.3 | 781        | 6 |
| 16 | 134 | 103 | 1.30 | 0.0637 | 0.0003 | 1.125  | 0.0128 | 0.1281 | 0.0013 | 732  | 11 | 765  | 6  | 777  | 7  | 98.5  | 777        | 7 |
| 17 | 149 | 60  | 2.51 | 0.0620 | 0.0005 | 1.018  | 0.0157 | 0.1189 | 0.0012 | 674  | 17 | 713  | 8  | 724  | 7  | 98.5  | 724        | 7 |
| 18 | 115 | 71  | 1.62 | 0.0623 | 0.0003 | 1.044  | 0.0119 | 0.1216 | 0.0011 | 684  | 12 | 726  | 6  | 740  | 6  | 98.1  | 740        | 6 |
| 19 | 361 | 895 | 0.40 | 0.0742 | 0.0003 | 1.573  | 0.0122 | 0.1538 | 0.0012 | 1046 | 8  | 959  | 5  | 922  | 7  | 104.0 | 922        | 7 |
| 20 | 365 | 165 | 2.22 | 0.0649 | 0.0003 | 1.183  | 0.0141 | 0.1323 | 0.0014 | 770  | 12 | 793  | 7  | 801  | 8  | 99.0  | 801        | 8 |
| 21 | 147 | 76  | 1.95 | 0.0632 | 0.0003 | 1.088  | 0.0112 | 0.1249 | 0.0010 | 714  | 10 | 748  | 5  | 759  | 6  | 98.6  | 759        | 6 |
| 22 | 160 | 217 | 0.74 | 0.1403 | 0.0005 | 7.498  | 0.0628 | 0.3876 | 0.0034 | 2231 | 7  | 2173 | 8  | 2112 | 16 | 105.6 | 2231       | 7 |
| 23 | 117 | 434 | 0.27 | 0.1279 | 0.0010 | 5.530  | 0.0912 | 0.3143 | 0.0056 | 2070 | 15 | 1905 | 14 | 1762 | 27 | 117.5 | Discordant |   |
| 24 | 186 | 109 | 1.70 | 0.0664 | 0.0003 | 1.084  | 0.0123 | 0.1185 | 0.0012 | 817  | 11 | 745  | 6  | 722  | 7  | 103.2 | 722        | 7 |
| 25 | 161 | 115 | 1.39 | 0.0649 | 0.0003 | 1.034  | 0.0112 | 0.1158 | 0.0013 | 770  | 11 | 721  | 6  | 706  | 7  | 102.1 | 706        | 7 |
| 26 | 178 | 93  | 1.92 | 0.0724 | 0.0005 | 1.242  | 0.0163 | 0.1240 | 0.0011 | 998  | 14 | 820  | 7  | 754  | 6  | 108.8 | 754        | 6 |
| 27 | 475 | 339 | 1.40 | 0.0668 | 0.0005 | 1.013  | 0.0106 | 0.1109 | 0.0016 | 831  | 15 | 710  | 5  | 678  | 9  | 104.7 | 678        | 9 |
| 28 | 121 | 261 | 0.46 | 0.1221 | 0.0009 | 5.412  | 0.0863 | 0.3222 | 0.0053 | 1988 | 14 | 1887 | 14 | 1800 | 26 | 110.4 | Discordant |   |
| 29 | 646 | 701 | 0.92 | 0.0730 | 0.0002 | 1.605  | 0.0098 | 0.1594 | 0.0010 | 1014 | 6  | 972  | 4  | 953  | 5  | 102.0 | 953        | 5 |
| 30 | 72  | 62  | 1.16 | 0.1046 | 0.0004 | 4.589  | 0.0382 | 0.3182 | 0.0026 | 1708 | 7  | 1747 | 7  | 1781 | 13 | 95.9  | 1708       | 7 |
| 31 | 387 | 442 | 0.87 | 0.1397 | 0.0005 | 7.230  | 0.0549 | 0.3754 | 0.0029 | 2223 | 6  | 2140 | 7  | 2055 | 14 | 108.2 | 2223       | 6 |
| 32 | 369 | 309 | 1.19 | 0.1375 | 0.0006 | 7.361  | 0.0625 | 0.3883 | 0.0033 | 2195 | 7  | 2156 | 8  | 2115 | 15 | 103.8 | 2195       | 7 |
| 33 | 314 | 311 | 1.01 | 0.0679 | 0.0003 | 1.345  | 0.0115 | 0.1437 | 0.0012 | 865  | 8  | 866  | 5  | 866  | 7  | 100.0 | 866        | 7 |
| 34 | 51  | 46  | 1.11 | 0.0835 | 0.0005 | 1.089  | 0.0165 | 0.1243 | 0.0012 | 723  | 18 | 748  | 8  | 755  | 7  | 99.1  | 755        | 7 |
| 35 | 119 | 106 | 1.12 | 0.0675 | 0.0003 | 1.217  | 0.0106 | 0.1309 | 0.0009 | 853  | 9  | 809  | 5  | 793  | 5  | 102.0 | 793        | 5 |
| 37 | 466 | 344 | 1.36 | 0.0757 | 0.0003 | 1.541  | 0.0115 | 0.1478 | 0.0012 | 1087 | 7  | 947  | 5  | 889  | 7  | 106.5 | 889        | 7 |
| 38 | 84  | 417 | 0.20 | 0.1304 | 0.0005 | 6.420  | 0.0551 | 0.3571 | 0.0030 | 2103 | 7  | 2035 | 8  | 1968 | 14 | 106.9 | 2103       | 7 |
| 39 | 72  | 46  | 1.58 | 0.0637 | 0.0005 | 1.045  | 0.0149 | 0.1192 | 0.0011 | 732  | 16 | 727  | 7  | 726  | 7  | 100.1 | 726        | 7 |
| 40 | 363 | 411 | 0.88 | 0.0659 | 0.0003 | 1.164  | 0.0117 | 0.1279 | 0.0011 | 804  | 10 | 784  | 6  | 776  | 6  | 101.0 | 776        | 6 |
| 41 | 155 | 116 | 1.34 | 0.1248 | 0.0005 | 6.240  | 0.0539 | 0.3624 | 0.0029 | 2026 | 7  | 2010 | 8  | 1994 | 14 | 101.6 | 2026       | 7 |
| 42 | 112 | 66  | 1.70 | 0.0722 | 0.0006 | 1.234  | 0.0179 | 0.1239 | 0.0011 | 993  | 15 | 816  | 8  | 753  | 6  | 108.4 | 753        | 6 |
| 43 | 131 | 102 | 1.28 | 0.0637 | 0.0003 | 1.121  | 0.0113 | 0.1276 | 0.0011 | 731  | 9  | 763  | 5  | 774  | 6  | 98.6  | 774        | 6 |
| 44 | 314 | 542 | 0.58 | 0.0654 | 0.0003 | 1.093  | 0.0100 | 0.1212 | 0.0011 | 787  | 8  | 750  | 5  | 738  | 6  | 101.6 | 738        | 6 |
| 45 | 184 | 166 | 1.11 | 0.0676 | 0.0005 | 1.155  | 0.0182 | 0.1235 | 0.0013 | 855  | 16 | 780  | 9  | 751  | 8  | 103.9 | 751        | 8 |
| 46 | 153 | 76  | 2.01 | 0.0633 | 0.0004 | 1.045  | 0.0139 | 0.1196 | 0.0012 | 719  | 13 | 726  | 7  | 728  | 7  | 99.7  | 728        | 7 |
| 47 | 112 | 154 | 0.73 | 0.0659 | 0.0003 | 1.186  | 0.0121 | 0.1307 | 0.0013 | 802  | 9  | 794  | 6  | 792  | 7  | 100.3 | 792        | 7 |
| 48 | 51  | 50  | 1.03 | 0.0636 | 0.0005 | 1.096  | 0.0171 | 0.1249 | 0.0013 | 728  | 16 | 751  | 8  | 759  | 7  | 98.9  | 759        | 7 |
| 50 | 365 | 139 | 2.62 | 0.0645 | 0.0003 | 1.092  | 0.0105 | 0.1228 | 0.0010 | 758  | 9  | 750  | 5  | 747  | 6  | 100.4 | 747        | 6 |
| 51 | 148 | 238 | 0.62 | 0.0635 | 0.0003 | 0.9886 | 0.0088 | 0.1128 | 0.0009 | 726  | 8  | 698  | 5  | 689  | 5  | 101.3 | 689        | 5 |
| 53 | 258 | 256 | 1.00 | 0.0653 | 0.0003 | 1.144  | 0.0117 | 0.1271 | 0.0011 | 783  | 9  | 774  | 6  | 771  | 6  | 100.4 | 771        | 6 |
| 54 | 60  | 67  | 0.89 | 0.1105 | 0.0005 | 5.035  | 0.0527 | 0.3305 | 0.0034 | 1807 | 8  | 1825 | 9  | 1841 | 16 | 98.2  | 1807       | 8 |
| 55 | 103 | 164 | 0.63 | 0.0648 | 0.0003 | 1.063  | 0.0108 | 0.1189 | 0.0008 | 767  | 10 | 735  | 5  | 724  | 5  | 101.5 | 724        | 5 |
| 57 | 48  | 136 | 0.35 | 0.1288 | 0.0007 | 6.334  | 0.0721 | 0.3566 | 0.0041 | 2081 | 9  | 2023 | 10 | 1966 | 19 | 105.8 | 2081       | 9 |
| 58 | 153 | 131 | 1.17 | 0.0688 | 0.0004 | 1.176  | 0.0142 | 0.1237 | 0.0010 | 893  | 12 | 789  | 7  | 752  | 6  | 104.9 | 752        | 6 |
| 60 | 351 | 220 | 1.59 | 0.0638 | 0.0003 | 1.078  | 0.0104 | 0.1226 | 0.0011 | 734  | 9  | 743  | 5  | 746  | 6  | 99.6  | 746        | 6 |

|    |     |     |      |        |        |        |        |        |        |      |    |      |    |      |    |       |            |    |
|----|-----|-----|------|--------|--------|--------|--------|--------|--------|------|----|------|----|------|----|-------|------------|----|
| 17 | 48  | 36  | 1.36 | 0.0651 | 0.0008 | 1.099  | 0.0231 | 0.1224 | 0.0015 | 778  | 25 | 753  | 11 | 744  | 8  | 101.2 | 744        | 8  |
| 18 | 197 | 218 | 0.90 | 0.0653 | 0.0003 | 1.207  | 0.0106 | 0.1342 | 0.0009 | 782  | 9  | 804  | 5  | 811  | 5  | 99.1  | 811        | 5  |
| 19 | 99  | 80  | 1.24 | 0.1232 | 0.0005 | 6.280  | 0.0530 | 0.3698 | 0.0030 | 2003 | 7  | 2016 | 7  | 2028 | 14 | 98.8  | 2003       | 7  |
| 20 | 36  | 28  | 1.27 | 0.0675 | 0.0012 | 1.111  | 0.0329 | 0.1190 | 0.0018 | 854  | 37 | 759  | 16 | 725  | 11 | 104.7 | 725        | 11 |
| 21 | 40  | 53  | 0.75 | 0.0655 | 0.0005 | 1.170  | 0.0177 | 0.1295 | 0.0012 | 789  | 17 | 787  | 8  | 785  | 7  | 100.3 | 785        | 7  |
| 23 | 33  | 486 | 0.07 | 0.0715 | 0.0002 | 1.596  | 0.0111 | 0.1620 | 0.0010 | 970  | 6  | 969  | 4  | 968  | 6  | 100.1 | 968        | 6  |
| 24 | 291 | 371 | 0.78 | 0.0607 | 0.0002 | 0.8674 | 0.0074 | 0.1036 | 0.0008 | 630  | 8  | 634  | 4  | 635  | 4  | 99.8  | 635        | 4  |
| 26 | 99  | 474 | 0.21 | 0.0708 | 0.0003 | 1.582  | 0.0139 | 0.1621 | 0.0014 | 951  | 8  | 963  | 5  | 968  | 8  | 99.5  | 968        | 8  |
| 27 | 89  | 136 | 0.65 | 0.0645 | 0.0003 | 1.124  | 0.0119 | 0.1264 | 0.0010 | 757  | 10 | 765  | 6  | 767  | 6  | 99.7  | 767        | 6  |
| 28 | 232 | 456 | 0.51 | 0.1148 | 0.0004 | 5.164  | 0.0446 | 0.3263 | 0.0027 | 1876 | 7  | 1847 | 7  | 1821 | 13 | 103.0 | 1876       | 7  |
| 29 | 26  | 42  | 0.61 | 0.1282 | 0.0007 | 6.677  | 0.0841 | 0.3783 | 0.0047 | 2073 | 10 | 2070 | 11 | 2068 | 22 | 100.2 | 2073       | 10 |
| 30 | 86  | 54  | 1.60 | 0.0630 | 0.0006 | 1.047  | 0.0180 | 0.1204 | 0.0013 | 708  | 19 | 727  | 9  | 733  | 8  | 99.2  | 733        | 8  |
| 31 | 39  | 54  | 0.73 | 0.1372 | 0.0006 | 7.781  | 0.0787 | 0.4117 | 0.0038 | 2192 | 8  | 2206 | 9  | 2223 | 17 | 98.6  | 2192       | 8  |
| 32 | 28  | 67  | 0.41 | 0.0690 | 0.0005 | 1.478  | 0.0217 | 0.1553 | 0.0016 | 900  | 15 | 921  | 9  | 931  | 9  | 98.9  | 931        | 9  |
| 33 | 211 | 493 | 0.43 | 0.1316 | 0.0004 | 6.933  | 0.0469 | 0.3821 | 0.0025 | 2119 | 5  | 2103 | 6  | 2086 | 12 | 101.6 | 2119       | 5  |
| 34 | 33  | 46  | 0.72 | 0.0671 | 0.0009 | 1.125  | 0.0254 | 0.1218 | 0.0014 | 840  | 29 | 765  | 12 | 741  | 8  | 103.2 | 741        | 8  |
| 35 | 41  | 57  | 0.71 | 0.0602 | 0.0005 | 0.8134 | 0.0130 | 0.0980 | 0.0009 | 611  | 20 | 604  | 7  | 603  | 5  | 100.2 | 603        | 5  |
| 37 | 60  | 333 | 0.18 | 0.0723 | 0.0002 | 1.647  | 0.0123 | 0.1652 | 0.0012 | 995  | 7  | 988  | 5  | 986  | 7  | 100.2 | 986        | 7  |
| 40 | 109 | 197 | 0.55 | 0.0656 | 0.0003 | 1.165  | 0.0106 | 0.1286 | 0.0010 | 795  | 9  | 784  | 5  | 780  | 5  | 100.5 | 780        | 5  |
| 41 | 105 | 57  | 1.84 | 0.0643 | 0.0005 | 1.132  | 0.0169 | 0.1277 | 0.0014 | 753  | 15 | 769  | 8  | 775  | 8  | 99.2  | 775        | 8  |
| 42 | 84  | 143 | 0.59 | 0.0640 | 0.0003 | 1.046  | 0.0100 | 0.1186 | 0.0007 | 741  | 10 | 727  | 5  | 722  | 4  | 100.7 | 722        | 4  |
| 43 | 115 | 212 | 0.54 | 0.0650 | 0.0003 | 1.066  | 0.0127 | 0.1189 | 0.0013 | 774  | 11 | 737  | 6  | 724  | 7  | 101.8 | 724        | 7  |
| 44 | 95  | 217 | 0.44 | 0.1294 | 0.0005 | 6.523  | 0.0580 | 0.3657 | 0.0034 | 2090 | 7  | 2049 | 8  | 2009 | 16 | 104.0 | 2090       | 7  |
| 45 | 30  | 40  | 0.74 | 0.0650 | 0.0007 | 1.244  | 0.0252 | 0.1385 | 0.0018 | 775  | 22 | 821  | 11 | 836  | 10 | 98.2  | 836        | 10 |
| 47 | 126 | 467 | 0.27 | 0.0753 | 0.0006 | 1.685  | 0.0268 | 0.1614 | 0.0017 | 1077 | 16 | 1003 | 10 | 964  | 10 | 104.0 | 964        | 10 |
| 48 | 34  | 109 | 0.31 | 0.0600 | 0.0003 | 0.8043 | 0.0101 | 0.0973 | 0.0009 | 605  | 13 | 599  | 6  | 599  | 5  | 100.0 | 599        | 5  |
| 49 | 215 | 430 | 0.50 | 0.0649 | 0.0003 | 1.141  | 0.0111 | 0.1275 | 0.0012 | 771  | 9  | 773  | 5  | 773  | 7  | 100.0 | 773        | 7  |
| 50 | 38  | 63  | 0.60 | 0.1063 | 0.0005 | 4.464  | 0.0462 | 0.3047 | 0.0028 | 1736 | 9  | 1724 | 9  | 1715 | 14 | 101.2 | 1736       | 9  |
| 51 | 102 | 128 | 0.80 | 0.0653 | 0.0003 | 1.122  | 0.0129 | 0.1245 | 0.0011 | 785  | 11 | 764  | 6  | 756  | 6  | 101.1 | 756        | 6  |
| 52 | 53  | 59  | 0.90 | 0.0633 | 0.0007 | 1.072  | 0.0202 | 0.1227 | 0.0013 | 720  | 23 | 740  | 10 | 746  | 7  | 99.2  | 746        | 7  |
| 53 | 27  | 317 | 0.08 | 0.0644 | 0.0003 | 1.111  | 0.0113 | 0.1252 | 0.0012 | 754  | 10 | 759  | 5  | 760  | 7  | 99.9  | 760        | 7  |
| 54 | 37  | 48  | 0.76 | 0.0652 | 0.0006 | 1.141  | 0.0208 | 0.1272 | 0.0017 | 779  | 19 | 773  | 10 | 772  | 9  | 100.1 | 772        | 9  |
| 55 | 18  | 39  | 0.48 | 0.1055 | 0.0007 | 3.987  | 0.0617 | 0.2743 | 0.0037 | 1723 | 13 | 1632 | 13 | 1562 | 19 | 110.3 | Discordant |    |
| 56 | 31  | 45  | 0.68 | 0.0637 | 0.0006 | 1.049  | 0.0186 | 0.1199 | 0.0015 | 731  | 19 | 728  | 9  | 730  | 8  | 99.7  | 730        | 8  |
| 57 | 111 | 155 | 0.72 | 0.0648 | 0.0003 | 1.085  | 0.0118 | 0.1215 | 0.0011 | 768  | 10 | 746  | 6  | 739  | 6  | 100.9 | 739        | 6  |
| 58 | 113 | 156 | 0.72 | 0.0918 | 0.0003 | 3.169  | 0.0261 | 0.2504 | 0.0019 | 1463 | 6  | 1450 | 6  | 1440 | 10 | 101.6 | 1463       | 6  |
| 59 | 198 | 197 | 1.01 | 0.0641 | 0.0003 | 1.066  | 0.0100 | 0.1207 | 0.0009 | 743  | 8  | 737  | 5  | 735  | 5  | 100.3 | 735        | 5  |
| 60 | 107 | 167 | 0.64 | 0.0648 | 0.0003 | 1.094  | 0.0115 | 0.1225 | 0.0010 | 767  | 9  | 751  | 6  | 745  | 6  | 100.8 | 745        | 6  |

Sample DWG5, sandstone, Early Silurian Kepintage Formation in Dawangou section of northern Tarim, (Chang et al., 2012, Journal of Earth Sciences and Environment)

|         |      |        |        |        |        |        |        |      |     |      |    |      |    |       |            |    |
|---------|------|--------|--------|--------|--------|--------|--------|------|-----|------|----|------|----|-------|------------|----|
| DWG5-1  | 1.59 | 0.1118 | 0.0020 | 4.845  | 0.0879 | 0.3143 | 0.0042 | 1829 | 33  | 1793 | 15 | 1762 | 21 | 103.8 | 1829       | 33 |
| DWG5-2  | 1.41 | 0.1646 | 0.0030 | 10.375 | 0.1934 | 0.4573 | 0.0064 | 2503 | 31  | 2469 | 17 | 2427 | 28 | 103.1 | 2503       | 31 |
| DWG5-3  | 0.35 | 0.0717 | 0.0010 | 1.565  | 0.0237 | 0.1584 | 0.0019 | 977  | 30  | 956  | 9  | 948  | 11 | 100.8 | 948        | 11 |
| DWG5-4  | 1.23 | 0.1215 | 0.0037 | 5.379  | 0.1586 | 0.3211 | 0.0054 | 1979 | 55  | 1882 | 25 | 1795 | 26 | 110.3 | Discordant |    |
| DWG5-5  | 0.52 | 0.0668 | 0.0010 | 1.168  | 0.0191 | 0.1269 | 0.0016 | 830  | 33  | 786  | 9  | 770  | 9  | 102.1 | 770        | 9  |
| DWG5-6  | 0.15 | 0.0741 | 0.0019 | 1.457  | 0.0379 | 0.1427 | 0.0022 | 1043 | 54  | 913  | 16 | 860  | 12 | 106.2 | 860        | 12 |
| DWG5-7  | 0.89 | 0.0778 | 0.0018 | 1.794  | 0.0399 | 0.1672 | 0.0022 | 1142 | 46  | 1043 | 14 | 997  | 12 | 104.6 | 997        | 12 |
| DWG5-8  | 0.75 | 0.0683 | 0.0015 | 1.201  | 0.0266 | 0.1276 | 0.0017 | 877  | 47  | 801  | 12 | 774  | 10 | 103.5 | 774        | 10 |
| DWG5-9  | 0.98 | 0.0648 | 0.0024 | 1.023  | 0.0363 | 0.1145 | 0.0019 | 769  | 79  | 716  | 18 | 699  | 11 | 102.4 | 699        | 11 |
| DWG5-10 | 0.90 | 0.0887 | 0.0025 | 0.9563 | 0.0264 | 0.0785 | 0.0013 | 1398 | 55  | 681  | 14 | 487  | 8  | 139.8 | Discordant |    |
| DWG5-11 | 0.80 | 0.0710 | 0.0018 | 1.133  | 0.0289 | 0.1158 | 0.0017 | 958  | 54  | 769  | 14 | 706  | 10 | 108.9 | 706        | 10 |
| DWG5-12 | 0.63 | 0.0753 | 0.0011 | 1.844  | 0.0294 | 0.1776 | 0.0023 | 1078 | 31  | 1061 | 11 | 1054 | 12 | 102.3 | 1078       | 31 |
| DWG5-13 | 0.65 | 0.0820 | 0.0011 | 2.370  | 0.0346 | 0.2098 | 0.0027 | 1245 | 27  | 1234 | 10 | 1228 | 14 | 101.4 | 1245       | 27 |
| DWG5-14 | 0.30 | 0.0814 | 0.0020 | 1.722  | 0.0409 | 0.1535 | 0.0023 | 1231 | 48  | 1017 | 15 | 920  | 13 | 110.5 | Discordant |    |
| DWG5-15 | 1.40 | 0.0671 | 0.0021 | 1.215  | 0.0377 | 0.1313 | 0.0021 | 841  | 68  | 807  | 17 | 795  | 12 | 101.5 | 795        | 12 |
| DWG5-16 | 1.19 | 0.0649 | 0.0012 | 1.088  | 0.0209 | 0.1215 | 0.0016 | 772  | 40  | 747  | 10 | 739  | 9  | 101.1 | 739        | 9  |
| DWG5-17 | 3.44 | 0.0651 | 0.0025 | 1.132  | 0.0416 | 0.1261 | 0.0022 | 777  | 81  | 769  | 20 | 766  | 12 | 100.4 | 766        | 12 |
| DWG5-18 | 1.36 | 0.1098 | 0.0023 | 4.842  | 0.1001 | 0.3198 | 0.0047 | 1796 | 38  | 1792 | 17 | 1789 | 23 | 100.4 | 1796       | 38 |
| DWG5-19 | 1.15 | 0.1740 | 0.0021 | 11.732 | 0.1601 | 0.4892 | 0.0062 | 2596 | 21  | 2583 | 13 | 2567 | 27 | 101.1 | 2596       | 21 |
| DWG5-20 | 0.33 | 0.1784 | 0.0021 | 12.290 | 0.1663 | 0.4996 | 0.0063 | 2638 | 20  | 2627 | 13 | 2612 | 27 | 101.0 | 2638       | 20 |
| DWG5-21 | 0.92 | 0.0718 | 0.0021 | 1.562  | 0.0444 | 0.1579 | 0.0025 | 979  | 60  | 955  | 18 | 945  | 14 | 101.1 | 945        | 14 |
| DWG5-22 | 0.79 | 0.1555 | 0.0020 | 9.686  | 0.1411 | 0.4519 | 0.0060 | 2407 | 22  | 2405 | 13 | 2404 | 27 | 100.1 | 2407       | 22 |
| DWG5-23 | 1.22 | 0.0961 | 0.0015 | 3.622  | 0.0598 | 0.2733 | 0.0037 | 1550 | 29  | 1554 | 13 | 1557 | 19 | 99.6  | 1550       | 29 |
| DWG5-24 | 1.14 | 0.0658 | 0.0011 | 1.141  | 0.0205 | 0.1257 | 0.0017 | 801  | 36  | 773  | 10 | 763  | 10 | 101.3 | 763        | 10 |
| DWG5-25 | 1.45 | 0.0681 | 0.0013 | 1.316  | 0.0255 | 0.1401 | 0.0019 | 871  | 39  | 853  | 11 | 845  | 11 | 100.9 | 845        | 11 |
| DWG5-26 | 1.38 | 0.1102 | 0.0022 | 3.812  | 0.0762 | 0.2510 | 0.0037 | 1802 | 36  | 1595 | 16 | 1444 | 19 | 124.8 | Discordant |    |
| DWG5-27 | 0.73 | 0.0676 | 0.0011 | 1.163  | 0.0196 | 0.1248 | 0.0017 | 857  | 33  | 783  | 9  | 758  | 10 | 103.3 | 758        | 10 |
| DWG5-28 | 0.96 | 0.1092 | 0.0024 | 4.783  | 0.1073 | 0.3177 | 0.0050 | 1786 | 42  | 1782 | 19 | 1778 | 24 | 100.4 | 1786       | 42 |
| DWG5-29 | 1.93 | 0.0686 | 0.0048 | 0.9942 | 0.0659 | 0.1052 | 0.0029 | 885  | 148 | 701  | 34 | 645  | 17 | 108.7 | 645        | 17 |
| DWG5-30 | 0.66 | 0.1538 | 0.0018 | 9.398  | 0.1307 | 0.4433 | 0.0057 | 2389 | 21  | 2378 | 13 | 2365 | 26 | 101.0 | 2389       | 21 |
| DWG5-31 | 1.31 | 0.1503 | 0.0024 | 9.000  | 0.1540 | 0.4344 | 0.0062 | 2349 | 28  | 2338 | 16 | 2325 | 28 | 101.0 | 2349       | 28 |
| DWG5-32 | 1.13 | 0.0652 | 0.0014 | 1.163  | 0.0250 | 0.1293 | 0.0018 | 782  | 45  | 783  | 12 | 784  | 11 | 99.9  | 784        | 11 |
| DWG5-33 | 0.99 | 0.0680 | 0.0017 | 1.188  | 0.0297 | 0.1267 | 0.0019 | 869  | 53  | 795  | 14 | 769  | 11 | 103.4 | 769        | 11 |
| DWG5-34 | 3.26 | 0.1256 | 0.0028 | 6.425  | 0.1435 | 0.3711 | 0.0059 | 2037 | 40  | 2036 | 20 | 2034 | 28 | 100.1 | 2037       | 40 |
| DWG5-35 | 1.39 | 0.0754 | 0.0017 | 1.847  | 0.0427 | 0.1778 | 0.0026 | 1078 | 47  | 1062 | 15 | 1055 | 14 | 102.2 | 1078       | 47 |
| DWG5-36 | 1.18 | 0.1640 | 0.0032 | 10.467 | 0.2067 | 0.4628 | 0.0073 | 2498 | 33  | 2477 | 18 | 2452 | 32 | 101.9 | 2498       | 33 |
| DWG5-37 | 1.45 | 0.0655 | 0.0025 | 1.136  | 0.0422 | 0.1258 | 0.0022 | 790  | 82  | 771  | 20 | 764  | 13 | 100.9 | 764        | 13 |
| DWG5-38 | 0.64 | 0.0629 | 0.0013 | 0.9679 | 0.0211 | 0.1117 | 0.0016 | 704  | 46  | 687  | 11 | 682  | 9  | 100.7 | 682        | 9  |
| DWG5-39 | 1.51 | 0.0660 | 0.0021 | 1.178  | 0.0369 | 0.1296 | 0.0021 | 805  | 68  | 791  | 17 | 785  | 12 | 100.8 | 785        | 12 |
| DWG5-40 | 1.10 | 0.1130 | 0.0019 | 5.125  | 0.0906 | 0.3290 | 0.0046 | 1848 | 31  | 1840 | 15 | 1833 | 22 | 100.8 | 1848       | 31 |
| DWG5-41 | 0.72 | 0.0665 | 0.0012 | 1.183  | 0.0229 | 0.1290 | 0.0018 | 822  | 40  | 792  | 11 | 782  | 10 | 101.3 | 782        | 10 |
| DWG5-42 | 1.05 | 0.0588 | 0.0013 | 0.8867 | 0.0151 | 0.0847 | 0.0012 | 559  | 48  | 531  | 9  | 524  | 7  | 101.3 | 524        | 7  |
| DWG5-43 | 0.89 | 0.1345 | 0.0042 | 7.365  | 0.2202 | 0.3971 | 0.0078 | 2158 | 55  | 2157 | 27 | 2156 | 36 | 100.1 | 2158       | 55 |
| DWG5-44 | 2.42 | 0.1453 | 0.0036 | 8.416  | 0.2036 | 0.4201 | 0.0073 | 2292 | 43  | 2277 | 22 | 2261 | 33 | 101.4 | 2292       | 43 |
| DWG5-45 | 2.31 | 0.1510 | 0.0039 | 9.044  | 0.2290 | 0.4346 | 0.0079 | 2357 | 45  | 2343 | 23 | 2326 | 35 | 101.3 | 2357       | 45 |
| DWG5-46 | 0.71 | 0.0673 | 0.0013 | 1.265  | 0.0252 | 0.1364 | 0.0019 | 846  | 41  | 830  | 11 | 824  | 11 | 100.7 | 824        | 11 |
| DWG5-47 | 3.78 | 0.0625 | 0.0020 | 0.9120 | 0.0283 | 0.1059 | 0.0017 | 691  | 69  | 658  | 15 | 649  | 10 | 101.4 | 649        | 10 |
| DWG5-48 | 1.01 | 0.1535 | 0.0025 | 7.343  | 0.1250 | 0.3470 | 0.0049 | 2385 | 28  | 2154 | 15 | 1920 | 24 | 124.2 | Discordant |    |
| DWG5-49 | 0.74 | 0.1124 | 0.0029 | 4.954  | 0.1244 | 0.3196 | 0.0054 | 1839 | 47  | 1811 | 21 | 1788 | 26 | 102.9 | 1839       | 47 |
| DWG5-50 | 0.51 | 0.1167 | 0.0017 | 5.534  | 0.0901 | 0.3441 | 0.0047 | 1906 | 27  | 1906 | 14 | 1906 | 22 | 100.0 | 1906       | 27 |
| DWG5-51 | 1.26 | 0.1577 | 0.0030 | 9.896  | 0.1914 | 0.4552 | 0.0070 | 2431 | 33  | 2425 | 18 | 2418 | 31 | 100.5 | 2431       | 33 |
| DWG5-52 | 2.05 | 0.0719 | 0.0014 | 1.569  | 0.0319 | 0.1582 | 0.0022 | 984  | 41  | 958  | 13 | 947  | 12 | 101.2 | 947        | 12 |
| DWG5-53 | 0.51 | 0.0771 | 0.0014 | 1.971  | 0.0366 | 0.1854 | 0.0025 | 1124 | 36  | 1106 | 13 | 1097 | 14 | 102.5 | 1124       | 36 |
| DWG5-54 | 0.38 | 0.1410 | 0.0029 | 7.659  | 0.1584 | 0.3940 | 0.0062 | 2239 | 36  | 2192 | 19 | 2141 | 29 | 104.6 | 2239       | 36 |
| DWG5-55 | 0.76 | 0.0659 | 0.0014 | 1.177  | 0.0257 | 0.1295 | 0.0018 | 804  | 46  | 790  | 12 | 785  | 10 | 100.6 | 785        | 10 |
| DWG5-56 | 1.98 | 0.0647 | 0.0024 | 1.088  | 0.0401 | 0.1221 | 0.0021 | 763  | 81  | 748  | 20 | 743  | 12 | 100.7 | 743        | 12 |
| DWG5-57 | 2.64 | 0.0670 | 0.0020 | 1.242  | 0.0366 | 0.1345 | 0.0021 | 838  | 64  | 820  | 17 | 813  | 12 | 100.9 | 813        | 12 |
| DWG5-58 | 0.32 | 0.1774 | 0.0022 | 12.210 | 0.1738 | 0.4992 | 0.0065 | 2629 | 21  | 2621 | 13 | 2610 | 28 | 100.7 | 2629       | 21 |
| DWG5-59 | 0.25 | 0.0763 | 0.0010 | 1.954  | 0.0298 | 0.1858 | 0.0024 | 1103 | 28  | 1100 | 10 | 1098 | 13 | 100.5 | 1103       | 28 |
| DWG5-60 | 1.43 | 0.1180 | 0.0032 | 5.552  | 0.1479 | 0.3413 | 0.0060 | 1926 | 50  | 1909 | 23 | 1893 | 29 | 101.7 | 1926       | 50 |



|         |       |        |        |        |        |        |        |      |     |      |    |      |    |       |            |    |
|---------|-------|--------|--------|--------|--------|--------|--------|------|-----|------|----|------|----|-------|------------|----|
| SHC1-18 | 0.89  | 0.0778 | 0.0009 | 2.072  | 0.0291 | 0.1932 | 0.0025 | 1141 | 25  | 1140 | 10 | 1139 | 13 | 100.2 | 1141       | 25 |
| SHC1-19 | 1.28  | 0.0673 | 0.0013 | 1.270  | 0.0259 | 0.1370 | 0.0019 | 846  | 42  | 832  | 12 | 828  | 11 | 100.5 | 828        | 11 |
| SHC1-20 | 3.98  | 0.1632 | 0.0021 | 7.791  | 0.1134 | 0.3462 | 0.0046 | 2489 | 22  | 2207 | 13 | 1916 | 22 | 129.9 | Discordant |    |
| SHC1-21 | 1.31  | 0.0568 | 0.0012 | 0.5887 | 0.0128 | 0.0751 | 0.0010 | 485  | 48  | 470  | 8  | 467  | 6  | 100.6 | 467        | 6  |
| SHC1-22 | 1.86  | 0.0719 | 0.0012 | 1.047  | 0.0182 | 0.1056 | 0.0014 | 983  | 34  | 727  | 9  | 647  | 8  | 112.4 | Discordant |    |
| SHC1-23 | 1.90  | 0.0685 | 0.0055 | 1.357  | 0.1042 | 0.1437 | 0.0043 | 883  | 171 | 870  | 45 | 866  | 24 | 100.5 | 866        | 24 |
| SHC1-24 | 1.76  | 0.1125 | 0.0018 | 5.072  | 0.0860 | 0.3270 | 0.0045 | 1840 | 29  | 1831 | 14 | 1824 | 22 | 100.9 | 1840       | 29 |
| SHC1-25 | 2.96  | 0.1116 | 0.0023 | 4.988  | 0.1029 | 0.3241 | 0.0048 | 1826 | 37  | 1817 | 17 | 1810 | 24 | 100.9 | 1826       | 37 |
| SHC1-26 | 4.55  | 0.0577 | 0.0012 | 0.7919 | 0.0163 | 0.0996 | 0.0014 | 518  | 45  | 592  | 9  | 612  | 8  | 96.7  | 612        | 8  |
| SHC1-27 | 3.00  | 0.0698 | 0.0030 | 1.213  | 0.0509 | 0.1261 | 0.0025 | 922  | 92  | 807  | 23 | 766  | 14 | 105.4 | 766        | 14 |
| SHC1-28 | 2.32  | 0.0644 | 0.0016 | 1.160  | 0.0286 | 0.1307 | 0.0019 | 754  | 53  | 782  | 13 | 792  | 11 | 98.7  | 792        | 11 |
| SHC1-29 | 2.80  | 0.0602 | 0.0021 | 0.6049 | 0.0204 | 0.0728 | 0.0012 | 612  | 76  | 480  | 13 | 453  | 7  | 106.0 | 453        | 7  |
| SHC1-30 | 2.83  | 0.0694 | 0.0018 | 1.386  | 0.0367 | 0.1449 | 0.0022 | 911  | 56  | 883  | 16 | 872  | 12 | 101.3 | 872        | 12 |
| SHC1-31 | 14.08 | 0.0802 | 0.0015 | 0.8104 | 0.0152 | 0.0733 | 0.0010 | 1202 | 36  | 603  | 9  | 456  | 6  | 132.2 | Discordant |    |
| SHC1-32 | 10.40 | 0.0654 | 0.0018 | 1.207  | 0.0326 | 0.1338 | 0.0020 | 788  | 58  | 804  | 15 | 809  | 11 | 99.4  | 809        | 11 |
| SHC1-33 | 2.31  | 0.0562 | 0.0010 | 0.5651 | 0.0108 | 0.0730 | 0.0010 | 459  | 42  | 455  | 7  | 454  | 6  | 100.2 | 454        | 6  |
| SHC1-34 | 3.20  | 0.0661 | 0.0012 | 1.194  | 0.0222 | 0.1310 | 0.0018 | 809  | 38  | 798  | 10 | 794  | 10 | 100.5 | 794        | 10 |
| SHC1-35 | 2.19  | 0.0564 | 0.0009 | 0.5683 | 0.0097 | 0.0731 | 0.0010 | 467  | 36  | 457  | 6  | 455  | 6  | 100.4 | 455        | 6  |
| SHC1-36 | 3.08  | 0.0562 | 0.0013 | 0.5415 | 0.0127 | 0.0698 | 0.0010 | 462  | 52  | 439  | 8  | 435  | 6  | 100.9 | 435        | 6  |
| SHC1-37 | 1.72  | 0.0678 | 0.0010 | 1.343  | 0.0215 | 0.1437 | 0.0019 | 862  | 31  | 864  | 9  | 865  | 11 | 99.9  | 865        | 11 |
| SHC1-38 | 1.78  | 0.0657 | 0.0016 | 1.129  | 0.0273 | 0.1247 | 0.0018 | 796  | 52  | 767  | 13 | 757  | 11 | 101.3 | 757        | 11 |
| SHC1-39 | 1.78  | 0.0696 | 0.0019 | 1.141  | 0.0305 | 0.1190 | 0.0018 | 916  | 57  | 773  | 14 | 725  | 11 | 106.6 | 725        | 11 |
| SHC1-40 | 3.53  | 0.0564 | 0.0019 | 0.5033 | 0.0165 | 0.0648 | 0.0010 | 467  | 76  | 414  | 11 | 405  | 6  | 102.2 | 405        | 6  |
| SHC1-41 | 1.76  | 0.0674 | 0.0009 | 1.310  | 0.0191 | 0.1409 | 0.0018 | 851  | 27  | 850  | 8  | 850  | 10 | 100.0 | 850        | 10 |
| SHC1-42 | 1.36  | 0.0668 | 0.0016 | 1.240  | 0.0292 | 0.1346 | 0.0020 | 832  | 50  | 819  | 13 | 814  | 11 | 100.6 | 814        | 11 |
| SHC1-43 | 2.01  | 0.0563 | 0.0013 | 0.5889 | 0.0136 | 0.0759 | 0.0011 | 463  | 52  | 470  | 9  | 472  | 6  | 99.6  | 472        | 6  |
| SHC1-44 | 1.00  | 0.0665 | 0.0011 | 1.275  | 0.0217 | 0.1391 | 0.0018 | 823  | 34  | 835  | 10 | 839  | 10 | 99.5  | 839        | 10 |
| SHC1-45 | 1.59  | 0.0671 | 0.0010 | 1.259  | 0.0204 | 0.1361 | 0.0018 | 841  | 32  | 827  | 9  | 823  | 10 | 100.5 | 823        | 10 |
| SHC1-46 | 1.37  | 0.0669 | 0.0016 | 0.9230 | 0.0219 | 0.1000 | 0.0015 | 836  | 50  | 664  | 12 | 615  | 9  | 108.0 | 615        | 9  |
| SHC1-47 | 1.39  | 0.0673 | 0.0012 | 1.280  | 0.0244 | 0.1379 | 0.0019 | 847  | 39  | 837  | 11 | 833  | 11 | 100.5 | 833        | 11 |
| SHC1-48 | 1.69  | 0.0725 | 0.0011 | 1.661  | 0.0274 | 0.1662 | 0.0022 | 1001 | 32  | 994  | 10 | 991  | 12 | 100.3 | 991        | 12 |
| SHC1-49 | 0.64  | 0.0681 | 0.0010 | 1.330  | 0.0209 | 0.1418 | 0.0018 | 870  | 30  | 859  | 9  | 855  | 10 | 100.5 | 855        | 10 |
| SHC1-50 | 1.37  | 0.1452 | 0.0032 | 8.433  | 0.1859 | 0.4212 | 0.0062 | 2291 | 39  | 2279 | 20 | 2266 | 28 | 101.1 | 2291       | 39 |

Sample TW10, sandstone, Early Silurian Kepingtage Formation in Keping area of northern Tarim, (Li et al., 2017, Geological Science and Technology Information)

|    |      |        |        |        |        |        |        |      |     |      |     |      |    |       |            |      |
|----|------|--------|--------|--------|--------|--------|--------|------|-----|------|-----|------|----|-------|------------|------|
| 1  | 0.63 | 0.1118 | 0.0028 | 5.069  | 0.1316 | 0.3275 | 0.0057 | 1829 | 45  | 1831 | 22  | 1826 | 28 | 100.2 | 1829       | 45   |
| 2  | 0.06 | 0.1444 | 0.0028 | 8.699  | 0.1699 | 0.4363 | 0.0072 | 2281 | 34  | 2307 | 18  | 2334 | 32 | 97.7  | 2281       | 34   |
| 3  | 0.77 | 0.1226 | 0.0032 | 3.748  | 0.0990 | 0.2220 | 0.0045 | 1994 | 47  | 1582 | 21  | 1293 | 24 | 154.2 | Discordant |      |
| 4  | 0.44 | 0.1567 | 0.0034 | 9.914  | 0.1999 | 0.4587 | 0.0070 | 2420 | 37  | 2427 | 19  | 2434 | 31 | 99.4  | 2420       | 37   |
| 5  | 0.34 | 0.0704 | 0.0017 | 1.490  | 0.0364 | 0.1530 | 0.0024 | 943  | 45  | 926  | 15  | 918  | 14 | 100.9 | 918        | 14   |
| 6  | 0.51 | 0.0753 | 0.0020 | 1.877  | 0.0492 | 0.1805 | 0.0032 | 1077 | 48  | 1073 | 17  | 1070 | 18 | 100.7 | 1077       | 48   |
| 7  | 0.52 | 0.3941 | 0.0080 | 45.860 | 0.9298 | 0.8422 | 0.0143 | 3887 | 30  | 3906 | 20  | 3939 | 50 | 98.7  | 3887       | 30   |
| 8  | 0.50 | 0.0767 | 0.0021 | 1.427  | 0.0380 | 0.1347 | 0.0024 | 1115 | 54  | 900  | 16  | 814  | 13 | 110.6 | Discordant |      |
| 9  | 0.66 | 0.1110 | 0.0029 | 5.199  | 0.1378 | 0.3388 | 0.0060 | 1817 | 47  | 1852 | 23  | 1881 | 29 | 96.6  | 1817       | 47   |
| 10 | 0.55 | 0.1003 | 0.0024 | 3.963  | 0.1034 | 0.2845 | 0.0046 | 1629 | 45  | 1627 | 21  | 1614 | 23 | 100.9 | 1629       | 45   |
| 11 | 0.47 | 0.1547 | 0.0032 | 9.771  | 0.2230 | 0.4553 | 0.0080 | 2399 | 35  | 2413 | 21  | 2419 | 35 | 99.2  | 2399       | 35   |
| 12 | 0.11 | 0.0768 | 0.0016 | 2.103  | 0.0458 | 0.1975 | 0.0030 | 1117 | 47  | 1150 | 15  | 1162 | 16 | 96.1  | 1117       | 47   |
| 13 | 0.38 | 0.0666 | 0.0015 | 1.244  | 0.0295 | 0.1348 | 0.0022 | 826  | 47  | 821  | 13  | 815  | 12 | 100.7 | 815        | 12   |
| 14 | 1.03 | 0.1616 | 0.0040 | 11.015 | 0.2767 | 0.4930 | 0.0084 | 2473 | 41  | 2524 | 23  | 2583 | 36 | 95.7  | 2473       | 41   |
| 15 | 0.50 | 0.0821 | 0.0028 | 1.299  | 0.0385 | 0.1153 | 0.0019 | 1256 | 72  | 845  | 17  | 704  | 11 | 120.0 | Discordant |      |
| 16 | 1.45 | 0.0634 | 0.0027 | 1.103  | 0.0467 | 0.1266 | 0.0027 | 720  | 91  | 755  | 23  | 768  | 15 | 98.3  | 768        | 15   |
| 17 | 0.33 | 0.1066 | 0.0027 | 5.093  | 0.1285 | 0.3458 | 0.0061 | 1743 | 47  | 1835 | 21  | 1914 | 29 | 91.1  | 1743       | 47   |
| 18 | 0.26 | 0.2401 | 0.0050 | 19.458 | 0.5018 | 0.5866 | 0.0133 | 3121 | 34  | 3065 | 25  | 2975 | 54 | 104.9 | 3121       | 34   |
| 19 | 0.92 | 0.1555 | 0.0040 | 9.022  | 0.2316 | 0.4206 | 0.0081 | 2407 | 42  | 2340 | 23  | 2263 | 37 | 106.4 | 2407       | 42   |
| 20 | 1.46 | 0.0689 | 0.0029 | 1.523  | 0.0654 | 0.1604 | 0.0033 | 898  | 89  | 940  | 26  | 959  | 18 | 98.0  | 959        | 18   |
| 21 | 0.85 | 0.1347 | 0.0032 | 7.741  | 0.1852 | 0.4152 | 0.0072 | 2161 | 47  | 2201 | 22  | 2239 | 33 | 96.5  | 2161       | 47   |
| 22 | 0.58 | 0.0704 | 0.0019 | 1.676  | 0.0439 | 0.1730 | 0.0033 | 940  | 55  | 999  | 17  | 1029 | 18 | 91.4  | 940        | 55   |
| 23 | 0.68 | 0.1162 | 0.0045 | 5.165  | 0.2108 | 0.3233 | 0.0076 | 1899 | 71  | 1847 | 35  | 1806 | 37 | 105.1 | 1899       | 71   |
| 24 | 0.74 | 0.1341 | 0.0031 | 7.623  | 0.1800 | 0.4085 | 0.0064 | 2154 | 41  | 2188 | 21  | 2208 | 29 | 97.6  | 2154       | 41   |
| 25 | 0.44 | 0.1641 | 0.0034 | 8.945  | 0.2035 | 0.4426 | 0.0082 | 2302 | 40  | 2332 | 21  | 2362 | 37 | 97.5  | 2302       | 40   |
| 26 | 0.99 | 0.2313 | 0.0190 | 8.480  | 1.265  | 0.1883 | 0.0106 | 3061 | 131 | 2284 | 136 | 1112 | 58 | 275.3 | Discordant |      |
| 27 | 0.43 | 0.0738 | 0.0027 | 1.606  | 0.0548 | 0.1600 | 0.0032 | 1035 | 75  | 973  | 21  | 957  | 18 | 101.7 | 957        | 18   |
| 28 | 0.32 | 0.1696 | 0.0034 | 10.330 | 0.2192 | 0.4396 | 0.0077 | 2554 | 33  | 2465 | 20  | 2349 | 34 | 108.7 | 2554       | 33   |
| 29 | 0.81 | 0.0774 | 0.0027 | 1.339  | 0.0497 | 0.1246 | 0.0021 | 1131 | 69  | 863  | 22  | 757  | 12 | 114.0 | Discordant |      |
| 30 | 1.06 | 0.0638 | 0.0029 | 0.7467 | 0.0353 | 0.0842 | 0.0015 | 744  | 96  | 566  | 21  | 521  | 9  | 108.6 | 521        | 9    |
| 31 | 1.05 | 0.0785 | 0.0022 | 2.076  | 0.0569 | 0.1914 | 0.0033 | 1161 | 54  | 1141 | 19  | 1129 | 18 | 102.8 | 1161       | 54   |
| 32 | 0.41 | 0.1006 | 0.0036 | 1.892  | 0.0621 | 0.1373 | 0.0025 | 1635 | 66  | 1078 | 22  | 829  | 14 | 130.0 | Discordant |      |
| 33 | 0.59 | 0.2476 | 0.0061 | 20.996 | 0.5394 | 0.6117 | 0.0109 | 3169 | 39  | 3138 | 25  | 3077 | 44 | 103.0 | 3169       | 39   |
| 34 | 0.34 | 0.0976 | 0.0023 | 3.559  | 0.0889 | 0.2629 | 0.0043 | 1589 | 44  | 1540 | 20  | 1505 | 22 | 105.6 | 1589       | 44   |
| 35 | 0.84 | 0.0888 | 0.0071 | 1.595  | 0.1583 | 0.1254 | 0.0023 | 1411 | 153 | 968  | 62  | 762  | 13 | 127.0 | Discordant |      |
| 36 | 1.05 | 0.0643 | 0.0016 | 1.102  | 0.0276 | 0.1245 | 0.0023 | 750  | 251 | 754  | 13  | 757  | 13 | 99.6  | 757        | 13   |
| 37 | 0.86 | 0.0685 | 0.0027 | 1.201  | 0.0466 | 0.1279 | 0.0025 | 883  | 81  | 801  | 21  | 776  | 15 | 103.2 | 776        | 15   |
| 38 | 0.17 | 0.0696 | 0.0017 | 1.280  | 0.0310 | 0.1335 | 0.0022 | 917  | 49  | 837  | 14  | 808  | 13 | 103.6 | 808        | 13   |
| 39 | 0.57 | 0.0668 | 0.0020 | 1.234  | 0.0316 | 0.1348 | 0.0022 | 831  | 62  | 816  | 14  | 815  | 13 | 100.1 | 815        | 13   |
| 40 | 0.69 | 0.1187 | 0.0029 | 5.463  | 0.1575 | 0.3315 | 0.0057 | 1937 | 44  | 1895 | 25  | 1846 | 28 | 104.9 | 1937       | 44   |
| 41 | 0.57 | 0.1893 | 0.0050 | 13.495 | 0.3495 | 0.5200 | 0.0106 | 2736 | 49  | 2715 | 24  | 2699 | 45 | 101.4 | 2736       | 49   |
| 42 | 0.44 | 0.1522 | 0.0037 | 8.512  | 0.2246 | 0.4071 | 0.0082 | 2370 | 42  | 2287 | 24  | 2202 | 38 | 107.6 | 2370       | 42   |
| 43 | 0.42 | 0.2673 | 0.0058 | 23.931 | 0.5562 | 0.6488 | 0.0119 | 3290 | 33  | 3266 | 23  | 3224 | 46 | 102.0 | 3290       | 33   |
| 44 | 0.24 | 0.0717 | 0.0025 | 1.396  | 0.0522 | 0.1414 | 0.0035 | 977  | 75  | 887  | 22  | 853  | 20 | 104.0 | 853        | 20   |
| 45 | 0.25 | 0.0772 | 0.0038 | 1.594  | 0.0910 | 0.1495 | 0.0037 | 1128 | 98  | 968  | 36  | 898  | 21 | 107.8 | 898        | 21   |
| 46 | 0.83 | 0.1169 | 0.0036 | 5.361  | 0.1683 | 0.3356 | 0.0075 | 1910 | 56  | 1879 | 27  | 1866 | 36 | 102.4 | 1910       | 56   |
| 47 | 0.71 | 0.1165 | 0.0035 | 5.128  | 0.1452 | 0.3217 | 0.0062 | 1903 | 59  | 1841 | 24  | 1798 | 30 | 105.8 | 1903       | 59   |
| 48 | 0.90 | 0.0776 | 0.0025 | 1.314  | 0.0427 | 0.1223 | 0.0023 | 1139 | 63  | 852  | 19  | 744  | 13 | 114.5 | Discordant |      |
| 49 | 0.92 | 0.0986 | 0.0043 | 1.833  | 0.0816 | 0.1357 | 0.0036 | 1598 | 81  | 1057 | 29  | 820  | 21 | 128.9 | Discordant |      |
| 50 | 1.19 | 0.0652 | 0.0019 | 1.078  | 0.0322 | 0.1203 | 0.0022 | 789  | 61  | 743  | 16  | 732  | 13 | 101.5 | 732        | 13   |
| 51 | 0.47 | 0.0741 | 0.0022 | 1.628  | 0.0498 | 0.1599 | 0.0029 | 1056 | 60  | 981  | 19  | 956  | 16 | 102.6 | 956        | 16   |
| 52 | 0.50 | 0.0756 | 0.0019 | 1.988  | 0.0565 | 0.1918 | 0.0039 | 1083 | 56  | 1111 | 19  | 1131 | 21 | 95.8  | 1083       | 56   |
| 53 | 0.61 | 0.1117 | 0.0032 | 5.114  | 0.1559 | 0.3319 | 0.0063 | 1828 | 51  | 1838 | 26  | 1848 | 30 | 98.9  | 1828       | 51   |
| 54 | 0.83 | 0.0608 | 0.0017 | 1.089  | 0.0322 | 0.1298 | 0.0022 | 632  | 64  | 748  | 16  | 786  | 13 | 95.2  | 786        | 13   |
| 55 | 0.33 | 0.0993 | 0.0023 | 3.997  | 0.0955 | 0.2926 | 0.0049 | 1611 | 43  | 1634 | 19  | 1654 | 25 | 97.4  | 1611       | 43   |
| 56 | 0.54 | 0.0755 | 0.0018 | 1.925  | 0.0485 | 0.1845 | 0.0028 | 1083 | 47  | 1090 | 17  | 1092 | 15 | 99.2  | 1083       | 47   |
| 57 | 0.98 | 0.1132 | 0.0035 | 5.439  | 0.1816 | 0.3472 | 0.0063 | 1852 | 56  | 1891 | 29  | 1921 | 30 | 96.4  | 1852       | 56   |
| 58 | 0.57 | 0.1526 | 0.0034 | 9.198  | 0.2084 | 0.4359 | 0.0062 | 2376 | 38  | 2358 | 21  | 2332 | 28 | 101.9 | 2376       | 38   |
| 59 | 0.69 | 0.0936 | 0.0024 | 3.520  | 0.0987 | 0.2716 | 0.0049 | 1502 | 49  | 1532 | 22  | 1549 | 25 | 97.0  | 1502       | 49   |
| 60 | 0.36 | 0.1123 | 0.0027 | 5.203  | 0.1297 | 0.3364 | 0.0066 | 1839 | 43  | 1853 | 21  | 1869 | 32 | 98.4  | 1839       | 43   |
| 61 | 0.64 | 0.1167 | 0.0038 | 5.395  | 0.1623 | 0.3385 | 0.0064 | 1905 | 55  | 1884 | 26  | 1880 | 31 | 101.3 | 1905       | 55   |
| 62 | 0.87 | 0.1778 | 0.0036 | 11.767 | 0.2567 | 0.4765 | 0.0078 | 2632 | 34  | 2586 | 20  | 2512 | 34 | 104.8 | 2632       | 34   |
| 63 | 0.64 | 0.1084 | 0.0030 | 5.013  | 0.1325 | 0.3347 | 0.0058 | 1773 | 56  | 1821 | 22  | 1861 | 28 | 95.3  | 1773       | 56   |
| 64 | 3.53 | 0.0633 | 0.0029 | 0.8051 | 0.0353 | 0.0924 | 0.0015 | 717  | 98  | 600  | 20  | 570  | 9  | 103.3 | 570        | 9    |
| 65 | 0.49 | 0.0811 | 0.0022 | 2.147  | 0.0580 | 0.1909 | 0.0034 | 1233 | 54  | 1164 | 19  | 1126 | 19 | 109.5 | 1233       | 54   |
| 66 | 1.39 | 0.0868 | 0.0026 | 1.432  | 0.0435 | 0.1188 | 0.0020 | 1367 | 57  | 903  | 18  | 724  | 12 | 124.7 | Discordant |      |
| 67 | 0.48 | 0.1104 | 0.0024 | 4.950  | 0.1093 | 0.3225 | 0.0047 | 1805 | 39  | 1811 | 19  | 1802 | 23 | 100.2 | 1805       | 39   |
| 68 | 1.36 | 0.1088 | 0.0029 | 5.022  | 0.1377 | 0.3332 | 0.0056 | 1789 | 49  | 1823 | 23  | 1854 | 27 | 96.5  | 1789       | 49   |
| 69 | 0.40 | 0.0912 | 0.0022 | 1.314  | 0.0351 | 0.1038 | 0.0018 | 1450 | 47  | 852  | 15  | 636  | 10 | 134.0 | Discordant |      |
| 70 | 0.50 | 0.0715 | 0.0022 | 1.570  | 0.0507 | 0.1594 | 0.0032 | 972  | 63  | 959  | 20  | 954  | 18 | 100.5 | 954        | 18   |
| 71 | 0.61 | 0.0699 | 0.0046 | 0.9947 | 0.0692 | 0.1039 | 0.0029 | 924  | 134 | 701  | 35  | 637  | 17 | 110.0 | Discordant |      |
| 72 | 0.37 | 0.0762 | 0.0021 | 2.030  | 0.0572 | 0.1918 | 0.0031 | 1102 | 49  | 1125 | 19  | 1131 | 17 | 97.4  | 1102       | 49   |
| 73 | 0.14 | 0.0780 | 0.0022 | 2.118  | 0.0595 | 0.1983 | 0.0041 | 1146 | 50  | 1155 | 19  | 1166 | 22 | 98.3  | 1146       | 50   |
| 74 | 0.64 | 0.0644 | 0.0024 | 1.224  | 0.0426 | 0.1397 | 0.0029 | 754  | 80  | 812  | 19  | 843  | 16 | 96.3  | 843        | 16   |
| 75 | 0.18 | 0.0757 | 0.0021 | 1.956  | 0.0570 | 0.1869 | 0.0036 | 1088 | 55  | 1100 | 20  | 1104 | 20 | 98.6  | 1088       | 55   |
| 76 | 0.58 | 0.0579 | 0.0028 | 0.9660 | 0.0435 | 0.1242 | 0.0027 | 524  | 108 | 686  | 22  | 755  | 15 | 90.9  | 755        | 15   |
| 77 | 0.83 | 0.0683 | 0.0023 | 1.150  | 0.0363 | 0.1233 | 0.0025 | 880  | 69  | 777  | 17  | 749  | 14 | 103.7 | 749        | 14   |
| 78 | 0.48 | 0.1028 | 0.0022 | 4.358  | 0.0896 | 0.3063 | 0.0044 | 1676 | 39  | 1704 | 17  | 1723 | 22 | 97.3  | 1676       | 39   |
| 79 | 0.50 | 0.1208 | 0.0034 | 6.440  | 0.1998 | 0.3837 | 0.0070 | 1969 | 50  | 2038 | 27  | 2094 | 32 | 94.0  | 1969       | 50</ |

|    |      |        |        |            |        |        |        |      |     |      |    |      |    |       |            |    |
|----|------|--------|--------|------------|--------|--------|--------|------|-----|------|----|------|----|-------|------------|----|
| 3  | 0.51 | 0.1033 | 0.0030 | 4.044      | 0.1244 | 0.2829 | 0.0055 | 1684 | 52  | 1643 | 25 | 1606 | 28 | 104.9 | 1684       | 52 |
| 4  | 0.35 | 0.0704 | 0.0023 | 1.628      | 0.0532 | 0.1681 | 0.0030 | 939  | 68  | 981  | 21 | 1002 | 17 | 93.7  | 939        | 68 |
| 5  | 0.90 | 0.1168 | 0.0041 | 5.817      | 0.1924 | 0.3631 | 0.0073 | 1909 | 57  | 1949 | 29 | 1997 | 35 | 95.6  | 1909       | 57 |
| 6  | 0.30 | 0.0795 | 0.0035 | 1.902      | 0.0827 | 0.1735 | 0.0041 | 1185 | 90  | 1082 | 29 | 1031 | 22 | 114.9 | Discordant |    |
| 7  | 0.99 | 0.0684 | 0.0039 | 1.521      | 0.0828 | 0.1629 | 0.0037 | 883  | 117 | 939  | 33 | 973  | 21 | 96.5  | 973        | 21 |
| 8  | 0.48 | 0.0665 | 0.0027 | 1.279      | 0.0533 | 0.1395 | 0.0032 | 820  | 79  | 836  | 24 | 842  | 18 | 99.3  | 842        | 18 |
| 9  | 0.48 | 0.1880 | 0.0055 | 13.670     | 0.4106 | 0.5252 | 0.0112 | 2725 | 48  | 2727 | 28 | 2721 | 47 | 100.1 | 2725       | 48 |
| 10 | 0.42 | 0.1708 | 0.0046 | 12.076     | 0.3404 | 0.5111 | 0.0105 | 2566 | 45  | 2610 | 26 | 2661 | 45 | 96.4  | 2566       | 45 |
| 11 | 0.48 | 0.0662 | 0.0024 | 1.253      | 0.0432 | 0.1373 | 0.0025 | 813  | 71  | 825  | 19 | 830  | 14 | 99.4  | 830        | 14 |
| 12 | 1.06 | 0.0657 | 0.0032 | 1.157      | 0.0536 | 0.1293 | 0.0025 | 796  | 98  | 781  | 25 | 784  | 14 | 99.6  | 784        | 14 |
| 13 | 1.35 | 0.1741 | 0.0049 | 10.489     | 0.3010 | 0.4369 | 0.0092 | 2598 | 47  | 2479 | 27 | 2337 | 41 | 111.2 | Discordant |    |
| 14 | 1.07 | 0.1778 | 0.0058 | 12.088     | 0.4093 | 0.4923 | 0.0105 | 2632 | 55  | 2611 | 32 | 2581 | 45 | 102.0 | 2632       | 55 |
| 15 | 0.56 | 0.1089 | 0.0034 | 4.636      | 0.1443 | 0.3078 | 0.0055 | 1783 | 57  | 1756 | 26 | 1730 | 27 | 103.1 | 1783       | 57 |
| 16 | 0.19 | 0.3817 | 0.0117 | 40.451     | 1.410  | 0.7581 | 0.0158 | 3839 | 46  | 3782 | 35 | 3637 | 58 | 105.6 | 3839       | 46 |
| 17 | 0.70 | 0.1634 | 0.0048 | 10.754     | 0.3205 | 0.4804 | 0.0103 | 2492 | 49  | 2502 | 28 | 2529 | 45 | 98.5  | 2492       | 49 |
| 18 | 0.59 | 0.0704 | 0.0044 | 1.247      | 0.0749 | 0.1335 | 0.0034 | 943  | 128 | 822  | 34 | 808  | 20 | 101.7 | 808        | 20 |
| 19 | 0.91 | 0.1647 | 0.0045 | 10.394     | 0.2988 | 0.4594 | 0.0082 | 2506 | 46  | 2471 | 27 | 2437 | 36 | 102.8 | 2506       | 46 |
| 20 | 0.15 | 0.1216 | 0.0034 | 5.492      | 0.1590 | 0.3297 | 0.0066 | 1979 | 49  | 1899 | 25 | 1837 | 32 | 107.7 | 1979       | 49 |
| 21 | 0.71 | 0.1733 | 0.0056 | 11.570     | 0.3972 | 0.4881 | 0.0101 | 2591 | 54  | 2570 | 32 | 2563 | 44 | 101.1 | 2591       | 54 |
| 22 | 0.67 | 0.0675 | 0.0025 | 1.202      | 0.0448 | 0.1304 | 0.0026 | 854  | 76  | 802  | 21 | 790  | 15 | 101.5 | 790        | 15 |
| 23 | 0.40 | 0.0747 | 0.0028 | 1.596      | 0.0626 | 0.1567 | 0.0030 | 1061 | 81  | 969  | 24 | 938  | 17 | 103.3 | 938        | 17 |
| 24 | 0.24 | 0.0626 | 0.0022 | 0.7254     | 0.0255 | 0.0849 | 0.0015 | 698  | 74  | 554  | 15 | 525  | 9  | 105.5 | 525        | 9  |
| 25 | 0.49 | 0.0641 | 0.0038 | 0.9653     | 0.0532 | 0.1133 | 0.0025 | 743  | 126 | 686  | 27 | 692  | 14 | 99.1  | 692        | 14 |
| 26 | 1.08 | 0.1034 | 0.0045 | 4.131      | 0.1838 | 0.2919 | 0.0063 | 1687 | 80  | 1660 | 36 | 1651 | 32 | 102.2 | 1687       | 80 |
| 27 | 0.14 | 0.0838 | 0.0024 | 2.144      | 0.0637 | 0.1870 | 0.0038 | 1288 | 56  | 1163 | 21 | 1105 | 20 | 116.6 | Discordant |    |
| 28 | 0.52 | 0.1103 | 0.0044 | 5.132      | 0.2169 | 0.3375 | 0.0075 | 1806 | 72  | 1841 | 36 | 1875 | 36 | 96.3  | 1806       | 72 |
| 29 | 0.89 | 0.0695 | 0.0036 | 1.332      | 0.0699 | 0.1386 | 0.0027 | 922  | 92  | 860  | 30 | 836  | 15 | 102.9 | 836        | 15 |
| 30 | 1.13 | 0.0692 | 0.0041 | 1.319      | 0.0765 | 0.1391 | 0.0038 | 906  | 122 | 854  | 34 | 840  | 21 | 101.7 | 840        | 21 |
| 31 | 1.14 | 0.0626 | 0.0031 | 1.128      | 0.0576 | 0.1306 | 0.0029 | 694  | 106 | 767  | 27 | 791  | 17 | 97.0  | 791        | 17 |
| 32 | 0.36 | 0.1769 | 0.0057 | 10.572     | 0.3570 | 0.4363 | 0.0109 | 2624 | 53  | 2486 | 31 | 2334 | 49 | 112.4 | Discordant |    |
| 33 | 0.53 | 0.0681 | 0.0032 | 1.123      | 0.0522 | 0.1203 | 0.0027 | 872  | 96  | 764  | 25 | 732  | 15 | 104.4 | 732        | 15 |
| 34 | 0.64 | 0.1069 | 0.0040 | 5.231      | 0.2176 | 0.3536 | 0.0090 | 1748 | 69  | 1858 | 35 | 1952 | 43 | 95.5  | Discordant |    |
| 35 | 0.74 | 0.0707 | 0.0030 | 1.328      | 0.0586 | 0.1369 | 0.0034 | 950  | 87  | 858  | 26 | 827  | 19 | 103.7 | 827        | 19 |
| 36 | 1.08 | 0.0665 | 0.0023 | 1.334      | 0.0453 | 0.1455 | 0.0029 | 820  | 77  | 861  | 20 | 876  | 16 | 98.3  | 876        | 16 |
| 37 | 0.56 | 0.1049 | 0.0044 | 4.915      | 0.1979 | 0.3400 | 0.0080 | 1713 | 76  | 1805 | 34 | 1887 | 39 | 90.8  | 1713       | 76 |
| 38 | 0.10 | 0.0740 | 0.0024 | 1.459      | 0.0452 | 0.1427 | 0.0026 | 1043 | 65  | 914  | 19 | 860  | 15 | 106.3 | 860        | 15 |
| 39 | 0.60 | 0.1112 | 0.0032 | 5.687      | 0.1582 | 0.3679 | 0.0062 | 1820 | 51  | 1929 | 24 | 2020 | 29 | 90.1  | 1820       | 51 |
| 40 | 0.62 | 0.0700 | 0.0026 | 1.622      | 0.0622 | 0.1667 | 0.0030 | 928  | 82  | 979  | 24 | 994  | 16 | 98.5  | 994        | 16 |
| 41 | 0.21 | 0.1742 | 0.0047 | 10.702     | 0.3345 | 0.4396 | 0.0095 | 2598 | 44  | 2498 | 29 | 2349 | 42 | 110.6 | Discordant |    |
| 42 | 1.15 | 0.0920 | 0.0036 | 3.032      | 0.1196 | 0.2389 | 0.0054 | 1533 | 74  | 1416 | 30 | 1381 | 28 | 111.0 | Discordant |    |
| 43 | 0.76 | 0.0990 | 0.0041 | 3.335      | 0.1405 | 0.2450 | 0.0058 | 1606 | 78  | 1489 | 33 | 1412 | 30 | 113.7 | Discordant |    |
| 44 | 0.48 | 0.0946 | 0.0033 | 3.167      | 0.1022 | 0.2433 | 0.0053 | 1520 | 65  | 1449 | 25 | 1404 | 27 | 108.3 | 1520       | 65 |
| 45 | 2.12 | 0.1620 | 0.0051 | 10.411     | 0.2983 | 0.4643 | 0.0087 | 2477 | 48  | 2472 | 27 | 2459 | 38 | 100.7 | 2477       | 48 |
| 46 | 0.58 | 0.0829 | 0.0029 | 1.964      | 0.0689 | 0.1708 | 0.0037 | 1278 | 101 | 1103 | 24 | 1016 | 20 | 125.8 | Discordant |    |
| 47 | 0.35 | 0.1197 | 0.0039 | 5.303      | 0.1715 | 0.3185 | 0.0070 | 1952 | 58  | 1869 | 28 | 1782 | 34 | 109.5 | 1952       | 58 |
| 48 | 4.14 | 0.0725 | 0.0043 | 0.8874     | 0.0483 | 0.0900 | 0.0024 | 999  | 119 | 645  | 26 | 556  | 14 | 116.0 | Discordant |    |
| 49 | 0.32 | 0.1704 | 0.0058 | 10.682     | 0.3524 | 0.4518 | 0.0105 | 2562 | 57  | 2496 | 31 | 2403 | 46 | 106.6 | 2562       | 57 |
| 50 | 0.38 | 0.1420 | 0.0051 | 8.086      | 0.3040 | 0.4054 | 0.0080 | 2254 | 63  | 2241 | 34 | 2194 | 37 | 102.7 | 2254       | 63 |
| 51 | 0.66 | 0.0797 | 0.0029 | 1.422      | 0.0490 | 0.1275 | 0.0024 | 1191 | 71  | 898  | 21 | 774  | 13 | 116.0 | Discordant |    |
| 52 | 1.42 | 0.0777 | 0.0052 | 1.740      | 0.1072 | 0.1639 | 0.0037 | 1140 | 133 | 1024 | 40 | 978  | 20 | 104.7 | 978        | 20 |
| 53 | 0.41 | 0.1620 | 0.0043 | 10.732     | 0.2848 | 0.4724 | 0.0085 | 2477 | 44  | 2500 | 25 | 2494 | 37 | 99.3  | 2477       | 44 |
| 54 | 1.06 | 0.1069 | 0.0046 | 4.882      | 0.1923 | 0.3341 | 0.0076 | 1747 | 79  | 1799 | 33 | 1858 | 37 | 94.0  | 1747       | 79 |
| 55 | 1.06 | 0.0603 | 0.0032 | 1.059      | 0.0520 | 0.1286 | 0.0029 | 613  | 115 | 733  | 26 | 780  | 16 | 94.0  | 780        | 16 |
| 56 | 0.44 | 0.2342 | 0.0077 | 21.953     | 0.6797 | 0.6719 | 0.0124 | 3081 | 53  | 3182 | 30 | 3313 | 48 | 93.0  | 3081       | 53 |
| 57 | 0.57 | 0.1323 | 0.0067 | 5.950      | 0.2946 | 0.3255 | 0.0083 | 2129 | 88  | 1969 | 43 | 1816 | 40 | 117.2 | Discordant |    |
| 58 | 0.84 | 0.0731 | 0.0029 | 1.821      | 0.0669 | 0.1809 | 0.0038 | 1017 | 47  | 1053 | 24 | 1072 | 21 | 94.9  | 1017       | 47 |
| 59 | 0.76 | 0.0633 | 0.0037 | 1.181      | 0.0729 | 0.1333 | 0.0032 | 720  | 124 | 792  | 34 | 806  | 18 | 98.3  | 806        | 18 |
| 60 | 0.52 | 0.1772 | 0.0046 | 12.804     | 0.3434 | 0.5220 | 0.0115 | 2627 | 43  | 2665 | 25 | 2708 | 49 | 97.0  | 2627       | 43 |
| 61 | 0.13 | 0.1122 | 0.0034 | 5.287      | 0.1657 | 0.3401 | 0.0074 | 1835 | 56  | 1867 | 27 | 1887 | 36 | 97.2  | 1835       | 56 |
| 62 | 0.23 | 0.0793 | 0.0030 | 1.896      | 0.0796 | 0.1709 | 0.0036 | 1181 | 74  | 1080 | 28 | 1017 | 20 | 116.1 | Discordant |    |
| 63 | 0.68 | 0.0637 | 0.0028 | 0.6224     | 0.0283 | 0.0698 | 0.0013 | 731  | 99  | 491  | 18 | 435  | 8  | 112.9 | Discordant |    |
| 64 | 0.52 | 0.0684 | 0.0028 | 1.553      | 0.0613 | 0.1649 | 0.0034 | 881  | 85  | 952  | 24 | 984  | 19 | 96.7  | 984        | 19 |
| 65 | 0.61 | 0.0876 | 0.0032 | 3.120      | 0.1185 | 0.2578 | 0.0057 | 1376 | 71  | 1438 | 29 | 1478 | 29 | 93.1  | 1376       | 71 |
| 66 | 0.23 | 0.0611 | 0.0022 | 0.8313     | 0.0302 | 0.0984 | 0.0018 | 643  | 77  | 614  | 17 | 605  | 11 | 101.5 | 605        | 11 |
| 67 | 1.07 | 0.0712 | 0.0035 | 1.237      | 0.0626 | 0.1253 | 0.0027 | 965  | 100 | 818  | 28 | 761  | 15 | 107.5 | 761        | 15 |
| 68 | 0.21 | 0.0727 | 0.0021 | 1.615      | 0.0561 | 0.1589 | 0.0029 | 1006 | 59  | 976  | 22 | 951  | 16 | 102.6 | 951        | 16 |
| 69 | 0.91 | 0.0571 | 0.0027 | 0.6617     | 0.0306 | 0.0839 | 0.0016 | 498  | 102 | 516  | 19 | 519  | 10 | 99.4  | 519        | 10 |
| 70 | 1.00 | 0.0684 | 0.0036 | 0.8969     | 0.0473 | 0.0961 | 0.0023 | 880  | 107 | 650  | 25 | 592  | 13 | 109.8 | 592        | 13 |
| 71 | 0.24 | 0.0713 | 0.0025 | 1.610      | 0.0596 | 0.1630 | 0.0029 | 969  | 72  | 974  | 23 | 973  | 16 | 100.1 | 973        | 16 |
| 72 | 0.56 | 0.1149 | 0.0039 | 4.932      | 0.1745 | 0.3112 | 0.0066 | 1880 | 61  | 1808 | 30 | 1747 | 32 | 107.6 | 1880       | 61 |
| 73 | 0.44 | 0.1577 | 0.0054 | 9.594      | 0.3408 | 0.4396 | 0.0083 | 2432 | 58  | 2397 | 33 | 2349 | 37 | 103.5 | 2432       | 58 |
| 74 | 0.42 | 0.0744 | 0.0029 | 1.839      | 0.0722 | 0.1806 | 0.0038 | 1052 | 79  | 1059 | 26 | 1070 | 21 | 98.3  | 1052       | 79 |
| 75 | 0.63 | 0.0692 | 0.0023 | 1.317      | 0.0421 | 0.1382 | 0.0024 | 906  | 69  | 853  | 18 | 834  | 14 | 102.3 | 834        | 14 |
| 76 | 0.60 | 0.0687 | 0.0026 | 1.230      | 0.0459 | 0.1298 | 0.0025 | 900  | 78  | 814  | 21 | 786  | 14 | 103.6 | 786        | 14 |
| 77 | 0.82 | 0.0639 | 0.0025 | 1.159      | 0.0437 | 0.1320 | 0.0027 | 739  | 81  | 781  | 21 | 799  | 15 | 97.7  | 799        | 15 |
| 78 | 0.62 | 0.0908 | 0.0026 | 2.525      | 0.0758 | 0.1999 | 0.0036 | 1443 | 54  | 1279 | 22 | 1175 | 20 | 122.8 | Discordant |    |
| 79 | 1.46 | 0.0684 | 0.0026 | 1.522      | 0.0580 | 0.1609 | 0.0035 | 883  | 117 | 939  | 23 | 962  | 20 | 97.6  | 962        | 20 |
| 80 | 0.32 | 0.0845 | 0.0029 | 201706.000 | 0.0739 | 0.1873 | 0.0043 | 1303 | 27  | 1172 | 24 | 1107 | 23 | 117.7 | Discordant |    |

Sample TW62, sandstone, Early Silurian Kepingtage Formation in Keping area of northern Tarim, (Li et al., 201

|    |       |        |        |        |        |        |        |      |     |      |    |      |    |       |            |     |
|----|-------|--------|--------|--------|--------|--------|--------|------|-----|------|----|------|----|-------|------------|-----|
| 40 | 0.75  | 0.1633 | 0.0048 | 10.797 | 0.3289 | 0.4751 | 0.0081 | 2500 | 50  | 2506 | 28 | 2506 | 35 | 99.8  | 2500       | 50  |
| 41 | 1.58  | 0.1093 | 0.0042 | 4.459  | 0.1658 | 0.2940 | 0.0061 | 1787 | 70  | 1723 | 31 | 1661 | 30 | 107.6 | 1787       | 70  |
| 42 | 0.37  | 0.1160 | 0.0035 | 5.133  | 0.1573 | 0.3184 | 0.0067 | 1895 | 55  | 1842 | 26 | 1782 | 33 | 106.3 | 1895       | 55  |
| 43 | 0.54  | 0.1706 | 0.0051 | 11.118 | 0.3299 | 0.4704 | 0.0088 | 2565 | 50  | 2533 | 28 | 2485 | 39 | 103.2 | 2565       | 50  |
| 44 | 1.13  | 0.1143 | 0.0039 | 5.113  | 0.1794 | 0.3243 | 0.0071 | 1868 | 62  | 1838 | 30 | 1811 | 35 | 103.1 | 1868       | 62  |
| 45 | 0.06  | 0.0716 | 0.0023 | 1.537  | 0.0488 | 0.1549 | 0.0028 | 976  | 65  | 945  | 20 | 929  | 15 | 101.7 | 929        | 15  |
| 46 | 0.60  | 0.0645 | 0.0037 | 1.114  | 0.0602 | 0.1259 | 0.0028 | 767  | 122 | 760  | 29 | 764  | 16 | 99.5  | 764        | 16  |
| 47 | 0.96  | 0.1719 | 0.0042 | 10.174 | 0.2557 | 0.4247 | 0.0060 | 2576 | 41  | 2451 | 23 | 2282 | 27 | 112.9 | Discordant |     |
| 48 | 0.72  | 0.1194 | 0.0043 | 4.950  | 0.1860 | 0.3046 | 0.0067 | 1947 | 65  | 1811 | 32 | 1714 | 33 | 113.6 | Discordant |     |
| 49 | 2.02  | 0.1034 | 0.0057 | 4.473  | 0.2516 | 0.3193 | 0.0089 | 1687 | 102 | 1726 | 47 | 1786 | 43 | 94.5  | 1687       | 102 |
| 50 | 0.63  | 0.0679 | 0.0023 | 1.302  | 0.0453 | 0.1385 | 0.0026 | 866  | 103 | 847  | 20 | 836  | 15 | 101.3 | 836        | 15  |
| 51 | 0.80  | 0.0854 | 0.0028 | 2.778  | 0.0989 | 0.2333 | 0.0046 | 1325 | 63  | 1350 | 27 | 1352 | 24 | 98.0  | 1325       | 63  |
| 52 | 0.45  | 0.0646 | 0.0021 | 1.231  | 0.0393 | 0.1388 | 0.0029 | 761  | 67  | 815  | 18 | 838  | 16 | 97.3  | 838        | 16  |
| 53 | 1.80  | 0.0659 | 0.0025 | 1.113  | 0.0400 | 0.1229 | 0.0023 | 803  | 78  | 760  | 19 | 747  | 13 | 101.7 | 747        | 13  |
| 54 | 1.64  | 0.1124 | 0.0035 | 5.803  | 0.1737 | 0.3760 | 0.0075 | 1839 | 56  | 1947 | 26 | 2058 | 35 | 89.4  | Discordant |     |
| 55 | 0.47  | 0.1161 | 0.0030 | 4.895  | 0.1245 | 0.3039 | 0.0049 | 1898 | 46  | 1801 | 21 | 1711 | 24 | 110.9 | Discordant |     |
| 56 | 0.51  | 0.1728 | 0.0051 | 11.902 | 0.3560 | 0.4990 | 0.0101 | 2585 | 50  | 2597 | 28 | 2609 | 43 | 99.1  | 2585       | 50  |
| 57 | 0.53  | 0.0754 | 0.0036 | 1.955  | 0.0924 | 0.1910 | 0.0045 | 1080 | 92  | 1100 | 32 | 1127 | 25 | 95.8  | 1080       | 92  |
| 58 | 0.57  | 0.0656 | 0.0034 | 1.291  | 0.0686 | 0.1410 | 0.0028 | 794  | 107 | 842  | 30 | 850  | 16 | 99.1  | 850        | 16  |
| 59 | 0.79  | 0.0652 | 0.0027 | 1.241  | 0.0464 | 0.1393 | 0.0027 | 783  | 83  | 820  | 21 | 841  | 15 | 97.5  | 841        | 15  |
| 60 | 0.70  | 0.0649 | 0.0026 | 1.238  | 0.0496 | 0.1377 | 0.0024 | 772  | 85  | 818  | 23 | 832  | 13 | 98.3  | 832        | 13  |
| 61 | 1.36  | 0.0703 | 0.0026 | 1.171  | 0.0410 | 0.1206 | 0.0020 | 937  | 74  | 787  | 19 | 734  | 11 | 107.2 | 734        | 11  |
| 62 | 0.63  | 0.0668 | 0.0022 | 1.192  | 0.0406 | 0.1284 | 0.0025 | 831  | 69  | 797  | 19 | 779  | 15 | 102.3 | 779        | 15  |
| 63 | 0.85  | 0.0854 | 0.0078 | 0.8102 | 0.0717 | 0.0709 | 0.0024 | 1326 | 177 | 603  | 40 | 442  | 15 | 136.4 | Discordant |     |
| 64 | 1.25  | 0.0656 | 0.0034 | 1.132  | 0.0585 | 0.1253 | 0.0027 | 794  | 107 | 769  | 28 | 761  | 16 | 101.1 | 761        | 16  |
| 65 | 0.52  | 0.0657 | 0.0027 | 1.200  | 0.0495 | 0.1318 | 0.0026 | 798  | 85  | 800  | 23 | 798  | 15 | 100.3 | 798        | 15  |
| 66 | 0.46  | 0.0706 | 0.0022 | 1.627  | 0.0514 | 0.1657 | 0.0028 | 946  | 62  | 981  | 20 | 988  | 16 | 99.3  | 988        | 16  |
| 67 | 0.27  | 0.0659 | 0.0020 | 1.205  | 0.0383 | 0.1317 | 0.0023 | 803  | 63  | 803  | 18 | 798  | 13 | 100.6 | 798        | 13  |
| 68 | 0.70  | 0.0811 | 0.0034 | 2.151  | 0.0947 | 0.1909 | 0.0037 | 1233 | 82  | 1165 | 31 | 1126 | 20 | 109.5 | 1233       | 82  |
| 69 | 0.61  | 0.1221 | 0.0036 | 5.820  | 0.7160 | 0.3458 | 0.0060 | 1987 | 47  | 1949 | 26 | 1915 | 29 | 103.8 | 1987       | 47  |
| 70 | 0.60  | 0.0780 | 0.0026 | 1.333  | 0.0460 | 0.1243 | 0.0024 | 1147 | 67  | 860  | 20 | 755  | 14 | 113.9 | Discordant |     |
| 71 | 0.58  | 0.0701 | 0.0024 | 1.179  | 0.0454 | 0.1217 | 0.0023 | 931  | 75  | 791  | 21 | 740  | 13 | 106.9 | 740        | 13  |
| 72 | 0.50  | 0.1448 | 0.0050 | 8.448  | 0.3074 | 0.4234 | 0.0067 | 2285 | 59  | 2280 | 33 | 2276 | 30 | 100.4 | 2285       | 59  |
| 73 | 0.40  | 0.0746 | 0.0030 | 1.285  | 0.0543 | 0.1254 | 0.0024 | 1059 | 81  | 839  | 24 | 761  | 14 | 110.2 | Discordant |     |
| 74 | 0.38  | 0.0671 | 0.0027 | 1.221  | 0.0472 | 0.1335 | 0.0024 | 843  | 83  | 810  | 22 | 808  | 14 | 100.2 | 808        | 14  |
| 75 | 0.68  | 0.0675 | 0.0028 | 1.134  | 0.0469 | 0.1215 | 0.0019 | 854  | 118 | 769  | 22 | 739  | 11 | 104.1 | 739        | 11  |
| 76 | 0.54  | 0.1046 | 0.0033 | 4.098  | 0.1327 | 0.2861 | 0.0055 | 1709 | 59  | 1654 | 26 | 1622 | 28 | 105.4 | 1709       | 59  |
| 77 | 0.28  | 0.1216 | 0.0032 | 5.924  | 0.1629 | 0.3527 | 0.0058 | 1979 | 47  | 1965 | 24 | 1947 | 28 | 101.6 | 1979       | 47  |
| 78 | 0.56  | 0.0976 | 0.0033 | 3.493  | 0.1205 | 0.2596 | 0.0047 | 1589 | 63  | 1526 | 27 | 1488 | 24 | 106.8 | 1589       | 63  |
| 79 | 0.54  | 0.1108 | 0.0038 | 4.550  | 0.1689 | 0.2947 | 0.0052 | 1813 | 63  | 1740 | 31 | 1665 | 26 | 108.9 | 1813       | 63  |
| 80 | 65.00 | 0.1629 | 0.0053 | 7.444  | 0.2441 | 0.3300 | 0.0067 | 2487 | 55  | 2166 | 29 | 1838 | 33 | 135.3 | Discordant |     |

Sample S109-3, sandstone, Late Ordovician Sangtamu Formation in Tabai uplift of northern Tarim, (Dong et al., 2016, Journal of Asian Earth Sciences)

|    |      |      |      |        |        |        |        |        |        |      |     |      |    |      |    |       |            |    |
|----|------|------|------|--------|--------|--------|--------|--------|--------|------|-----|------|----|------|----|-------|------------|----|
| 4  | 249  | 364  | 0.68 | 0.0744 | 0.0047 | 1.834  | 0.1061 | 0.1787 | 0.0062 | 1053 | 63  | 1058 | 38 | 1060 | 34 | 99.3  | 1053       | 63 |
| 7  | 269  | 775  | 0.35 | 0.0786 | 0.0030 | 2.087  | 0.0731 | 0.1926 | 0.0045 | 1163 | 35  | 1145 | 24 | 1135 | 24 | 102.5 | 1163       | 35 |
| 9  | 261  | 245  | 1.06 | 0.1115 | 0.0035 | 5.131  | 0.1501 | 0.3338 | 0.0078 | 1824 | 24  | 1841 | 25 | 1857 | 38 | 98.2  | 1824       | 24 |
| 7  | 34   | 1483 | 0.02 | 0.0720 | 0.0015 | 1.576  | 0.0298 | 0.1587 | 0.0023 | 987  | 18  | 961  | 12 | 950  | 13 | 101.2 | 950        | 13 |
| 10 | 182  | 257  | 0.71 | 0.0614 | 0.0068 | 0.8811 | 0.0895 | 0.1041 | 0.0053 | 653  | 133 | 642  | 48 | 639  | 31 | 100.5 | 639        | 31 |
| 11 | 128  | 131  | 0.98 | 0.1116 | 0.0050 | 5.129  | 0.2110 | 0.3335 | 0.0104 | 1825 | 35  | 1841 | 35 | 1855 | 50 | 98.4  | 1825       | 35 |
| 13 | 876  | 816  | 1.07 | 0.0656 | 0.0023 | 1.060  | 0.0340 | 0.1172 | 0.0023 | 795  | 36  | 734  | 17 | 714  | 13 | 102.8 | 714        | 13 |
| 15 | 415  | 925  | 0.45 | 0.0749 | 0.0024 | 1.522  | 0.0446 | 0.1473 | 0.0029 | 1067 | 30  | 939  | 18 | 886  | 16 | 106.0 | 886        | 16 |
| 16 | 303  | 394  | 0.77 | 0.1640 | 0.0032 | 11.003 | 0.2005 | 0.4866 | 0.0088 | 2498 | 14  | 2523 | 17 | 2556 | 38 | 97.7  | 2498       | 14 |
| 17 | 913  | 1540 | 0.59 | 0.0599 | 0.0022 | 0.7559 | 0.0258 | 0.0916 | 0.0018 | 599  | 41  | 572  | 15 | 565  | 11 | 101.2 | 565        | 11 |
| 18 | 330  | 2127 | 0.16 | 0.0763 | 0.0014 | 1.890  | 0.0317 | 0.1796 | 0.0025 | 1104 | 15  | 1077 | 11 | 1065 | 13 | 103.7 | 1104       | 15 |
| 19 | 240  | 126  | 1.91 | 0.0571 | 0.0053 | 1.030  | 0.0896 | 0.1309 | 0.0051 | 494  | 124 | 719  | 45 | 793  | 29 | 90.7  | 793        | 29 |
| 21 | 1593 | 1139 | 1.40 | 0.1031 | 0.0017 | 4.228  | 0.0624 | 0.2975 | 0.0041 | 1681 | 12  | 1679 | 12 | 1679 | 20 | 100.1 | 1681       | 12 |
| 22 | 40   | 84   | 0.48 | 0.0720 | 0.0073 | 1.641  | 0.1559 | 0.1654 | 0.0077 | 985  | 119 | 986  | 60 | 987  | 42 | 99.9  | 987        | 42 |
| 23 | 58   | 53   | 1.09 | 0.0677 | 0.0109 | 1.285  | 0.1945 | 0.1376 | 0.0090 | 860  | 209 | 839  | 86 | 831  | 51 | 101.0 | 831        | 51 |
| 24 | 2415 | 725  | 3.33 | 0.0935 | 0.0021 | 3.224  | 0.0672 | 0.2501 | 0.0042 | 1498 | 18  | 1463 | 16 | 1439 | 21 | 104.1 | 1498       | 18 |
| 25 | 568  | 2762 | 0.21 | 0.0715 | 0.0013 | 1.378  | 0.0223 | 0.1399 | 0.0018 | 971  | 15  | 880  | 10 | 844  | 10 | 104.3 | 844        | 10 |
| 26 | 312  | 621  | 0.50 | 0.0766 | 0.0024 | 2.035  | 0.0593 | 0.1927 | 0.0038 | 1111 | 29  | 1127 | 20 | 1136 | 20 | 97.8  | 1111       | 29 |
| 28 | 398  | 638  | 0.62 | 0.0702 | 0.0023 | 1.675  | 0.0496 | 0.1731 | 0.0033 | 934  | 31  | 999  | 19 | 1029 | 18 | 90.8  | 934        | 31 |
| 30 | 320  | 477  | 0.67 | 0.1618 | 0.0026 | 10.805 | 0.1616 | 0.4844 | 0.0076 | 2475 | 12  | 2506 | 14 | 2546 | 33 | 97.2  | 2475       | 12 |
| 31 | 216  | 396  | 0.55 | 0.0690 | 0.0031 | 1.584  | 0.0646 | 0.1666 | 0.0040 | 898  | 46  | 964  | 25 | 993  | 22 | 97.1  | 993        | 22 |
| 32 | 530  | 571  | 0.93 | 0.0957 | 0.0023 | 3.949  | 0.0893 | 0.2993 | 0.0054 | 1542 | 20  | 1624 | 18 | 1688 | 27 | 91.4  | 1542       | 20 |
| 33 | 2286 | 1707 | 1.34 | 0.0796 | 0.0018 | 1.790  | 0.0375 | 0.1632 | 0.0026 | 1186 | 20  | 1042 | 14 | 974  | 14 | 107.0 | 974        | 14 |
| 35 | 103  | 349  | 0.29 | 0.1358 | 0.0028 | 8.334  | 0.1599 | 0.4452 | 0.0080 | 2174 | 15  | 2268 | 17 | 2374 | 36 | 91.6  | 2174       | 15 |
| 36 | 469  | 667  | 0.70 | 0.1046 | 0.0020 | 4.550  | 0.0819 | 0.3155 | 0.0049 | 1708 | 15  | 1740 | 15 | 1768 | 24 | 96.6  | 1708       | 15 |
| 37 | 753  | 815  | 0.92 | 0.0714 | 0.0019 | 1.633  | 0.0390 | 0.1660 | 0.0027 | 968  | 24  | 983  | 15 | 990  | 15 | 99.3  | 990        | 15 |
| 38 | 503  | 665  | 0.76 | 0.0611 | 0.0032 | 0.6027 | 0.0287 | 0.0716 | 0.0018 | 641  | 61  | 479  | 18 | 446  | 11 | 107.4 | 446        | 11 |
| 39 | 301  | 314  | 0.96 | 0.0667 | 0.0029 | 1.529  | 0.0613 | 0.1664 | 0.0039 | 827  | 46  | 942  | 25 | 992  | 22 | 95.0  | 992        | 22 |
| 40 | 236  | 335  | 0.71 | 0.1116 | 0.0031 | 5.073  | 0.1279 | 0.3298 | 0.0068 | 1825 | 21  | 1832 | 21 | 1838 | 33 | 99.3  | 1825       | 21 |
| 41 | 294  | 183  | 1.60 | 0.0687 | 0.0050 | 1.253  | 0.0846 | 0.1322 | 0.0046 | 890  | 84  | 825  | 38 | 801  | 26 | 103.0 | 801        | 26 |
| 42 | 459  | 309  | 1.48 | 0.0970 | 0.0032 | 3.532  | 0.1069 | 0.2641 | 0.0059 | 1567 | 27  | 1534 | 24 | 1511 | 30 | 103.7 | 1567       | 27 |
| 43 | 359  | 809  | 0.44 | 0.0792 | 0.0026 | 1.796  | 0.0542 | 0.1645 | 0.0033 | 1177 | 30  | 1044 | 20 | 982  | 18 | 106.3 | 982        | 18 |
| 45 | 340  | 250  | 1.36 | 0.1646 | 0.0045 | 10.904 | 0.2804 | 0.4806 | 0.0116 | 2503 | 19  | 2515 | 24 | 2530 | 50 | 98.9  | 2503       | 19 |
| 46 | 1114 | 877  | 1.27 | 0.1049 | 0.0027 | 2.437  | 0.0555 | 0.1686 | 0.0030 | 1278 | 152 | 1075 | 48 | 978  | 19 | 109.9 | 978        | 19 |
| 48 | 2926 | 1394 | 2.10 | 0.0788 | 0.0020 | 2.002  | 0.0462 | 0.1844 | 0.0031 | 1166 | 22  | 1116 | 16 | 1091 | 17 | 106.9 | 1166       | 22 |
| 49 | 264  | 331  | 0.80 | 0.1014 | 0.0037 | 3.641  | 0.1223 | 0.2606 | 0.0064 | 1649 | 30  | 1559 | 27 | 1493 | 33 | 110.4 | Discordant |    |
| 50 | 135  | 268  | 0.50 | 0.1295 | 0.0037 | 6.365  | 0.1672 | 0.3565 | 0.0080 | 2092 | 21  | 2027 | 23 | 1965 | 38 | 106.5 | 2092       | 21 |
| 52 | 269  | 313  | 0.86 | 0.0688 | 0.0035 | 1.276  | 0.0593 | 0.1347 | 0.0037 | 892  | 53  | 835  | 26 | 814  | 21 | 102.6 | 814        | 21 |
| 53 | 217  | 1512 | 0.14 | 0.0744 | 0.0018 | 1.582  | 0.0341 | 0.1541 | 0.0024 | 1053 | 21  | 963  | 13 | 924  | 13 | 104.2 | 924        | 13 |
| 54 | 153  | 414  | 0.37 | 0.1285 | 0.0027 | 6.981  | 0.1382 | 0.3943 | 0.0071 | 2077 | 16  | 2109 | 18 | 2143 | 33 | 96.9  | 2077       | 16 |
| 55 | 388  | 505  | 0.77 | 0.1725 | 0.0027 | 11.843 | 0.1782 | 0.4979 | 0.0078 | 2582 | 12  | 2592 | 14 | 2605 | 34 | 99.1  | 2582       | 12 |
| 56 | 362  | 696  | 0.52 | 0.1771 | 0.0024 | 11.788 | 0.1516 | 0.4828 | 0.0068 | 2626 | 10  | 2588 | 12 | 2539 | 30 | 103.4 | 2626       | 10 |
| 57 | 309  | 1254 | 0.25 | 0.0698 | 0.0016 | 1.580  | 0.0329 | 0.1644 | 0.0025 | 921  | 21  | 963  | 13 | 981  | 14 | 98.2  | 981        | 14 |
| 58 | 580  | 479  | 1.21 | 0.1616 | 0.0028 | 9.663  | 0.1581 | 0.4338 | 0.0071 | 2399 | 72  | 2354 | 33 | 2303 | 37 | 104.2 | 2399       | 72 |
| 59 | 864  | 2867 | 0.30 | 0.0686 | 0.0013 | 1.249  | 0.0210 | 0.1321 | 0.0017 | 886  | 16  | 823  | 9  | 800  | 10 | 102.9 | 800        | 10 |
| 60 | 342  | 332  | 1.03 | 0.0610 | 0.0039 | 0.7233 | 0.0425 | 0.0860 | 0.0026 | 640  | 76  | 553  | 25 | 532  | 15 | 103.9 | 532        | 15 |
| 61 | 290  | 772  | 0.38 | 0.0591 | 0.0025 | 0.7123 | 0.0276 | 0.0874 | 0.0018 | 572  | 48  | 546  | 16 | 540  | 11 | 101.1 | 540        | 11 |
| 62 | 340  | 360  | 0.95 | 0.0638 | 0.0030 | 1.110  | 0.0484 | 0.1262 | 0.0031 | 735  | 52  | 758  | 23 | 766  | 18 | 99.0  | 766        | 18 |
| 63 | 249  | 672  | 0.37 | 0.0747 | 0.0023 | 1.724  | 0.0491 | 0.1675 | 0.0032 | 1061 | 29  | 1018 | 18 | 998  | 17 | 100.0 | 998        | 17 |
| 64 | 294  | 606  | 0.48 | 0.0847 | 0.0023 | 2.606  | 0.0644 | 0.2233 | 0.0040 | 1308 | 23  | 1302 | 18 | 1299 | 21 | 102.7 | 1308       | 23 |
| 66 | 492  | 1096 | 0.45 | 0.1047 | 0.0017 | 4.118  | 0.0620 | 0.2855 | 0.0039 | 1709 | 12  | 1658 | 12 | 1619 | 20 | 105.6 | 1709       | 12 |
| 67 | 74   | 1295 | 0.06 | 0.0764 | 0.0015 | 2.000  | 0.0346 | 0.1899 | 0.0026 | 1106 | 16  | 1116 | 12 | 1121 | 14 | 98.7  | 1106       | 16 |
| 68 | 102  | 212  | 0.48 | 0.1138 | 0.0035 | 5.446  | 0.1534 | 0.3471 | 0.0079 | 1862 | 23  | 1892 | 24 | 1921 | 38 | 96.9  | 1862       | 23 |
| 69 | 358  | 1060 | 0.34 | 0.0740 | 0.0019 | 1.630  | 0.0386 | 0.1599 | 0.0026 | 1040 | 24  | 982  | 15 | 956  | 15 | 102.7 | 956        | 15 |
| 71 | 444  | 822  | 0.54 | 0.0895 | 0.0018 | 3.045  | 0.0573 | 0.2468 | 0.0037 | 1415 | 16  | 1419 | 14 | 1422 | 19 | 99.5  | 1415       | 16 |
| 72 | 244  | 455  | 0.54 | 0.0879 | 0.0026 | 2.942  | 0.0787 | 0.2429 | 0.0047 | 1380 | 25  | 1393 | 20 | 1402 | 25 | 98.4  | 1380       | 25 |
| 74 | 222  | 409  | 0.54 | 0.1768 | 0.0030 | 12.255 | 0.2002 | 0.5028 | 0.0084 | 2623 | 13  | 2624 | 15 | 2626 | 36 | 99.9  | 2623       | 13 |
| 75 | 243  | 464  | 0.52 | 0.0739 | 0.0023 | 1.991  | 0.0559 | 0.1955 | 0.0037 | 1038 | 28  | 1112 | 19 | 1151 | 20 | 90.2  | 1038       | 28 |
| 76 | 361  | 901  | 0.40 | 0.1821 | 0.0025 | 13.234 | 0.1716 | 0.5271 | 0.0075 | 2672 | 10  | 2696 | 12 | 2729 | 32 | 97.9  | 2672       | 10 |
| 78 | 467  | 684  | 0.68 | 0.0672 | 0.0022 | 1.375  | 0.0403 | 0.1485 | 0.0027 | 843  | 32  | 878  | 17 | 892  | 15 | 98.4  | 892        | 15 |
| 79 | 200  | 2214 | 0.09 | 0.0698 | 0.0013 | 1.558  | 0.0271 | 0.1619 | 0.0022 | 924  | 17  | 954  | 11 | 967  | 12 | 98.7  | 967        | 12 |
| 80 | 200  | 534  | 0.38 | 0.0806 | 0.0024 | 2.297  | 0.0623 | 0.2069 | 0.0039 | 1211 | 26  | 1211 | 19 | 1212 | 21 | 99.9  | 1211       | 26 |
| 82 | 185  | 1196 | 0.16 | 0.0802 | 0.0022 | 1.096  | 0.0267 | 0.0991 | 0.0017 | 750  | 97  | 630  | 19 | 597  | 10 | 105.5 | 597        | 10 |
| 83 | 1843 | 1990 | 0.93 | 0.0797 | 0.0015 | 1.704  | 0.0290 | 0.1551 | 0.0021 | 1189 | 15  | 1010 | 11 | 930  | 12 | 108.6 | 930        | 12 |
| 85 | 913  | 809  | 1.13 | 0.0711 | 0.0019 | 1.576  | 0.0390 | 0.1609 | 0.0027 | 960  | 25  | 961  | 15 | 962  | 15 | 99.9  | 962        | 15 |
| 86 | 131  | 242  | 0.54 | 0.1305 | 0.0034 | 7.067  | 0.1737 | 0.3930 | 0.0083 | 2104 | 19  | 2120 | 22 | 2137 | 39 | 98.5  | 2104       | 19 |
| 87 | 171  | 1242 | 0.14 | 0.0706 | 0.0017 | 1.518  | 0.0328 | 0.1561 | 0.0024 | 945  | 22  | 938  | 13 | 935  | 13 | 100.3 | 935        | 13 |
| 88 | 457  | 777  | 0.59 | 0.0711 | 0.0022 | 1.473  | 0.0421 | 0.1503 | 0.0028 | 961  | 30  | 919  | 17 | 903  | 15 | 101.8 | 903        | 15 |
| 89 | 673  | 1884 | 0.36 | 0.0738 | 0.0016 | 1.594  | 0.0314 | 0.1568 | 0.0023 | 1035 | 19  | 968  | 12 | 939  | 13 | 103.1 | 939        | 13 |
| 90 | 411  | 595  | 0.69 | 0.1612 | 0.0026 | 9.781  | 0.1494 | 0.4402 | 0.0068 | 2412 | 53  | 2377 | 23 | 2336 | 32 | 103.3 | 2412       | 53 |
| 91 | 117  | 208  | 0.56 | 0.0702 | 0.0044 | 1.343  | 0.0771 | 0.1388 | 0.0044 | 934  | 67  | 864  | 33 | 838  | 25 | 103.1 | 838        | 25 |
| 92 | 188  | 99   | 1.90 | 0.2589 | 0.0069 | 26.634 | 0.7345 | 0.7464 | 0.0    |      |     |      |    |      |    |       |            |    |

|     |     |      |      |        |        |        |        |        |        |      |     |      |    |      |    |       |      |    |
|-----|-----|------|------|--------|--------|--------|--------|--------|--------|------|-----|------|----|------|----|-------|------|----|
| 98  | 559 | 932  | 0.60 | 0.0792 | 0.0019 | 1.795  | 0.0395 | 0.1645 | 0.0026 | 1177 | 21  | 1044 | 14 | 981  | 14 | 106.4 | 981  | 14 |
| 99  | 99  | 348  | 0.28 | 0.0586 | 0.0041 | 0.7711 | 0.0498 | 0.0954 | 0.0030 | 553  | 87  | 580  | 29 | 588  | 18 | 98.6  | 588  | 18 |
| 100 | 381 | 553  | 0.69 | 0.0683 | 0.0049 | 0.9468 | 0.0622 | 0.1006 | 0.0037 | 878  | 78  | 676  | 32 | 618  | 21 | 109.4 | 618  | 21 |
| 101 | 532 | 2580 | 0.21 | 0.1975 | 0.0019 | 15.261 | 0.1366 | 0.5607 | 0.0062 | 2806 | 8   | 2832 | 9  | 2869 | 25 | 97.8  | 2806 | 8  |
| 102 | 122 | 111  | 1.10 | 0.1111 | 0.0057 | 4.821  | 0.2290 | 0.3148 | 0.0112 | 1817 | 41  | 1789 | 40 | 1764 | 55 | 103.0 | 1817 | 41 |
| 104 | 339 | 1282 | 0.26 | 0.0824 | 0.0017 | 2.417  | 0.0465 | 0.2128 | 0.0032 | 1256 | 18  | 1248 | 14 | 1243 | 17 | 101.0 | 1256 | 18 |
| 106 | 479 | 658  | 0.73 | 0.0678 | 0.0027 | 1.191  | 0.0435 | 0.1274 | 0.0028 | 863  | 41  | 796  | 20 | 773  | 16 | 103.0 | 773  | 16 |
| 109 | 166 | 374  | 0.44 | 0.0659 | 0.0030 | 1.203  | 0.0504 | 0.1324 | 0.0031 | 804  | 49  | 802  | 23 | 802  | 18 | 100.0 | 802  | 18 |
| 111 | 271 | 699  | 0.39 | 0.1161 | 0.0023 | 5.511  | 0.1022 | 0.3445 | 0.0056 | 1897 | 15  | 1902 | 16 | 1908 | 27 | 99.4  | 1897 | 15 |
| 112 | 271 | 1126 | 0.24 | 0.0698 | 0.0018 | 1.649  | 0.0382 | 0.1715 | 0.0027 | 921  | 24  | 989  | 15 | 1020 | 15 | 90.3  | 921  | 24 |
| 114 | 71  | 79   | 0.90 | 0.1130 | 0.0062 | 4.918  | 0.2493 | 0.3157 | 0.0117 | 1849 | 44  | 1805 | 43 | 1769 | 57 | 104.5 | 1849 | 44 |
| 116 | 104 | 299  | 0.35 | 0.1672 | 0.0036 | 12.042 | 0.2458 | 0.5225 | 0.0102 | 2530 | 15  | 2608 | 19 | 2710 | 43 | 93.4  | 2530 | 15 |
| 120 | 654 | 2554 | 0.26 | 0.0992 | 0.0014 | 3.619  | 0.0476 | 0.2648 | 0.0032 | 1608 | 11  | 1554 | 10 | 1515 | 16 | 106.1 | 1608 | 11 |
| 121 | 105 | 1155 | 0.09 | 0.2064 | 0.0024 | 15.546 | 0.1722 | 0.5465 | 0.0068 | 2878 | 9   | 2849 | 11 | 2810 | 28 | 102.4 | 2878 | 9  |
| 122 | 387 | 949  | 0.41 | 0.1167 | 0.0020 | 5.865  | 0.0918 | 0.3646 | 0.0052 | 1907 | 13  | 1956 | 14 | 2004 | 24 | 95.2  | 1907 | 13 |
| 124 | 321 | 207  | 1.55 | 0.1153 | 0.0040 | 4.952  | 0.1567 | 0.3116 | 0.0077 | 1885 | 26  | 1811 | 27 | 1748 | 38 | 107.8 | 1885 | 26 |
| 125 | 288 | 138  | 2.08 | 0.0629 | 0.0059 | 1.022  | 0.0882 | 0.1178 | 0.0052 | 706  | 111 | 715  | 44 | 718  | 30 | 99.6  | 718  | 30 |
| 126 | 853 | 1399 | 0.61 | 0.1615 | 0.0022 | 9.424  | 0.1158 | 0.4234 | 0.0054 | 2471 | 10  | 2380 | 11 | 2276 | 24 | 108.6 | 2471 | 10 |
| 127 | 172 | 603  | 0.29 | 0.1605 | 0.0025 | 10.700 | 0.1557 | 0.4839 | 0.0070 | 2460 | 11  | 2497 | 14 | 2544 | 30 | 96.7  | 2460 | 11 |
| 129 | 826 | 945  | 0.87 | 0.0690 | 0.0021 | 1.404  | 0.0388 | 0.1476 | 0.0026 | 900  | 30  | 891  | 16 | 887  | 15 | 100.5 | 887  | 15 |
| 130 | 597 | 1689 | 0.35 | 0.0780 | 0.0016 | 2.097  | 0.0382 | 0.1950 | 0.0027 | 1148 | 17  | 1148 | 13 | 1148 | 15 | 100.0 | 1148 | 17 |

Sample XJ065-1, sandstone, Late Ordovician Yuanbaoshan Formation in Qurugatq of northern Tarim. (Dong et al., 2016, Journal of Asian Earth Sciences)

|       |      |      |      |        |        |        |        |        |        |      |     |      |    |      |    |       |            |    |
|-------|------|------|------|--------|--------|--------|--------|--------|--------|------|-----|------|----|------|----|-------|------------|----|
| D1-1  | 514  | 303  | 0.59 | 0.0639 | 0.0021 | 1.174  | 0.0357 | 0.1334 | 0.0025 | 737  | 34  | 788  | 17 | 807  | 14 | 97.6  | 807        | 14 |
| D1-2  | 1041 | 871  | 0.84 | 0.0766 | 0.0026 | 1.057  | 0.0315 | 0.1001 | 0.0020 | 1112 | 30  | 732  | 16 | 615  | 12 | 119.0 | Discordant |    |
| D1-3  | 528  | 470  | 0.89 | 0.0767 | 0.0035 | 1.336  | 0.0541 | 0.1264 | 0.0033 | 1113 | 42  | 861  | 24 | 768  | 19 | 112.1 | Discordant |    |
| D1-4  | 561  | 490  | 0.87 | 0.0699 | 0.0030 | 1.182  | 0.0463 | 0.1227 | 0.0029 | 926  | 43  | 792  | 22 | 746  | 17 | 106.2 | 746        | 17 |
| D1-5  | 747  | 413  | 0.55 | 0.0698 | 0.0017 | 1.256  | 0.0285 | 0.1306 | 0.0020 | 923  | 23  | 826  | 13 | 791  | 12 | 104.4 | 791        | 12 |
| D1-6  | 603  | 572  | 0.95 | 0.0681 | 0.0020 | 1.250  | 0.0338 | 0.1332 | 0.0024 | 871  | 29  | 823  | 15 | 806  | 13 | 102.1 | 806        | 13 |
| D1-7  | 446  | 391  | 0.88 | 0.0694 | 0.0033 | 1.288  | 0.0559 | 0.1348 | 0.0035 | 909  | 48  | 840  | 25 | 815  | 20 | 103.1 | 815        | 20 |
| D1-8  | 739  | 444  | 0.60 | 0.0663 | 0.0046 | 1.184  | 0.0779 | 0.1295 | 0.0028 | 816  | 149 | 793  | 36 | 785  | 16 | 101.0 | 785        | 16 |
| D1-9  | 1006 | 698  | 0.69 | 0.0814 | 0.0034 | 1.318  | 0.0498 | 0.1176 | 0.0029 | 1230 | 38  | 854  | 22 | 716  | 17 | 119.3 | Discordant |    |
| D1-10 | 1791 | 1919 | 1.07 | 0.0995 | 0.0027 | 0.9273 | 0.0220 | 0.0676 | 0.0012 | 1616 | 21  | 666  | 12 | 422  | 7  | 157.8 | Discordant |    |
| D1-11 | 1944 | 2071 | 1.07 | 0.0989 | 0.0026 | 0.7486 | 0.0167 | 0.0549 | 0.0009 | 1604 | 19  | 567  | 10 | 345  | 6  | 164.3 | Discordant |    |
| D1-12 | 98   | 56   | 0.58 | 0.0738 | 0.0070 | 1.443  | 0.1243 | 0.1421 | 0.0071 | 1035 | 97  | 907  | 52 | 856  | 40 | 106.0 | 856        | 40 |
| D1-13 | 2276 | 2710 | 1.19 | 0.1097 | 0.0025 | 0.8549 | 0.0164 | 0.0565 | 0.0009 | 1795 | 16  | 627  | 9  | 355  | 5  | 176.6 | Discordant |    |
| D1-14 | 690  | 739  | 1.07 | 0.0827 | 0.0022 | 1.261  | 0.0300 | 0.1107 | 0.0019 | 1262 | 22  | 829  | 13 | 677  | 11 | 122.5 | Discordant |    |
| D1-15 | 587  | 426  | 0.73 | 0.0647 | 0.0019 | 1.067  | 0.0280 | 0.1197 | 0.0020 | 765  | 29  | 737  | 14 | 729  | 12 | 101.1 | 729        | 12 |
| D1-16 | 585  | 307  | 0.53 | 0.0679 | 0.0018 | 1.259  | 0.0309 | 0.1347 | 0.0022 | 864  | 26  | 828  | 14 | 814  | 13 | 101.7 | 814        | 13 |
| D1-17 | 461  | 218  | 0.47 | 0.0632 | 0.0021 | 1.191  | 0.0369 | 0.1367 | 0.0026 | 716  | 35  | 796  | 17 | 826  | 15 | 96.4  | 826        | 15 |
| D1-18 | 856  | 887  | 1.04 | 0.0950 | 0.0054 | 1.562  | 0.0842 | 0.1192 | 0.0023 | 1529 | 111 | 955  | 33 | 726  | 13 | 131.5 | Discordant |    |
| D1-19 | 510  | 242  | 0.47 | 0.0663 | 0.0022 | 1.249  | 0.0377 | 0.1368 | 0.0026 | 815  | 33  | 823  | 17 | 827  | 15 | 99.5  | 827        | 15 |
| D1-20 | 73   | 95   | 1.30 | 0.0721 | 0.0056 | 1.182  | 0.0825 | 0.1190 | 0.0048 | 988  | 79  | 792  | 38 | 725  | 27 | 109.2 | 725        | 27 |
| D1-21 | 248  | 432  | 1.74 | 0.0629 | 0.0027 | 1.200  | 0.0468 | 0.1385 | 0.0030 | 705  | 47  | 801  | 22 | 836  | 17 | 95.8  | 836        | 17 |
| D1-22 | 1048 | 633  | 0.60 | 0.0750 | 0.0033 | 1.286  | 0.0522 | 0.1244 | 0.0020 | 1068 | 90  | 840  | 23 | 756  | 11 | 111.1 | Discordant |    |
| D1-23 | 1153 | 165  | 0.14 | 0.0685 | 0.0022 | 0.9702 | 0.0271 | 0.1027 | 0.0015 | 885  | 67  | 689  | 14 | 630  | 9  | 109.4 | 630        | 9  |
| D1-24 | 1276 | 1073 | 0.84 | 0.0759 | 0.0041 | 1.013  | 0.0515 | 0.0968 | 0.0017 | 1092 | 110 | 710  | 26 | 596  | 10 | 119.1 | Discordant |    |
| D1-25 | 472  | 184  | 0.39 | 0.0652 | 0.0021 | 1.231  | 0.0365 | 0.1370 | 0.0026 | 781  | 33  | 815  | 17 | 828  | 15 | 98.4  | 828        | 15 |
| D1-26 | 781  | 1472 | 1.89 | 0.0771 | 0.0019 | 1.107  | 0.0249 | 0.1043 | 0.0017 | 1123 | 22  | 757  | 12 | 639  | 10 | 118.5 | Discordant |    |
| D1-27 | 277  | 330  | 1.19 | 0.0679 | 0.0027 | 1.278  | 0.0463 | 0.1366 | 0.0031 | 864  | 40  | 836  | 21 | 826  | 17 | 101.2 | 826        | 17 |
| D1-28 | 731  | 724  | 0.99 | 0.0841 | 0.0023 | 1.458  | 0.0354 | 0.1259 | 0.0022 | 1294 | 23  | 913  | 15 | 764  | 12 | 119.5 | Discordant |    |
| D1-29 | 895  | 813  | 0.91 | 0.1067 | 0.0047 | 1.722  | 0.0700 | 0.1171 | 0.0020 | 1743 | 83  | 1017 | 26 | 714  | 12 | 142.4 | Discordant |    |
| D1-30 | 527  | 199  | 0.38 | 0.0708 | 0.0019 | 1.301  | 0.0320 | 0.1333 | 0.0022 | 952  | 25  | 846  | 14 | 807  | 13 | 104.8 | 807        | 13 |
| D1-31 | 340  | 129  | 0.38 | 0.0691 | 0.0024 | 1.279  | 0.0411 | 0.1343 | 0.0027 | 901  | 35  | 836  | 18 | 812  | 16 | 103.0 | 812        | 16 |
| D1-32 | 194  | 231  | 1.19 | 0.0641 | 0.0029 | 1.217  | 0.0503 | 0.1377 | 0.0034 | 746  | 48  | 808  | 23 | 831  | 19 | 97.2  | 831        | 19 |
| D1-33 | 226  | 196  | 0.87 | 0.0644 | 0.0027 | 1.201  | 0.0463 | 0.1353 | 0.0031 | 754  | 44  | 801  | 21 | 818  | 18 | 97.9  | 818        | 18 |
| D1-34 | 712  | 378  | 0.53 | 0.0661 | 0.0016 | 1.239  | 0.0280 | 0.1360 | 0.0021 | 810  | 23  | 818  | 13 | 822  | 12 | 99.5  | 822        | 12 |
| D1-35 | 831  | 481  | 0.58 | 0.0705 | 0.0031 | 1.218  | 0.0496 | 0.1253 | 0.0020 | 942  | 92  | 809  | 23 | 761  | 11 | 106.3 | 761        | 11 |
| D1-36 | 1233 | 815  | 0.66 | 0.0831 | 0.0015 | 1.311  | 0.0218 | 0.1145 | 0.0016 | 1272 | 15  | 850  | 10 | 699  | 9  | 121.6 | Discordant |    |
| D1-37 | 770  | 468  | 0.61 | 0.0775 | 0.0038 | 1.330  | 0.0608 | 0.1246 | 0.0020 | 1133 | 99  | 859  | 26 | 757  | 12 | 113.5 | Discordant |    |
| D1-38 | 924  | 622  | 0.67 | 0.0778 | 0.0015 | 1.382  | 0.0246 | 0.1288 | 0.0018 | 1143 | 16  | 881  | 10 | 781  | 10 | 112.8 | Discordant |    |
| D1-39 | 1079 | 736  | 0.68 | 0.0819 | 0.0017 | 1.158  | 0.0215 | 0.1026 | 0.0015 | 1243 | 17  | 781  | 10 | 629  | 9  | 124.2 | Discordant |    |
| D1-40 | 623  | 361  | 0.58 | 0.0738 | 0.0037 | 1.341  | 0.0638 | 0.1317 | 0.0022 | 1037 | 105 | 864  | 28 | 798  | 13 | 108.3 | 798        | 13 |
| D1-41 | 358  | 291  | 0.81 | 0.0633 | 0.0021 | 1.166  | 0.0358 | 0.1336 | 0.0025 | 719  | 35  | 785  | 17 | 808  | 14 | 97.2  | 808        | 14 |
| D1-42 | 862  | 662  | 0.77 | 0.0701 | 0.0023 | 1.210  | 0.0359 | 0.1252 | 0.0024 | 932  | 31  | 805  | 17 | 760  | 14 | 105.9 | 760        | 14 |
| D1-43 | 1341 | 1024 | 0.76 | 0.0884 | 0.0017 | 1.221  | 0.0209 | 0.1002 | 0.0014 | 1391 | 15  | 810  | 10 | 616  | 8  | 131.5 | Discordant |    |
| D1-44 | 1081 | 720  | 0.67 | 0.0768 | 0.0020 | 1.156  | 0.0271 | 0.1092 | 0.0018 | 1117 | 23  | 780  | 13 | 668  | 11 | 116.8 | Discordant |    |
| D1-45 | 550  | 312  | 0.57 | 0.0703 | 0.0021 | 1.346  | 0.0368 | 0.1390 | 0.0025 | 936  | 28  | 866  | 16 | 839  | 14 | 103.2 | 839        | 14 |
| D1-46 | 1065 | 675  | 0.63 | 0.0804 | 0.0017 | 1.245  | 0.0237 | 0.1123 | 0.0017 | 1207 | 17  | 821  | 11 | 686  | 10 | 119.7 | Discordant |    |
| D1-47 | 1748 | 6029 | 3.45 | 0.1088 | 0.0022 | 1.051  | 0.0180 | 0.0700 | 0.0010 | 1780 | 14  | 729  | 9  | 436  | 6  | 167.2 | Discordant |    |
| D1-48 | 1251 | 858  | 0.69 | 0.0871 | 0.0026 | 1.301  | 0.0348 | 0.1083 | 0.0021 | 1363 | 25  | 846  | 15 | 663  | 12 | 127.6 | Discordant |    |
| D1-49 | 552  | 486  | 0.88 | 0.0682 | 0.0019 | 1.236  | 0.0309 | 0.1315 | 0.0022 | 874  | 26  | 817  | 14 | 796  | 13 | 102.6 | 796        | 13 |
| D1-50 | 1436 | 1719 | 1.20 | 0.0824 | 0.0045 | 1.175  | 0.0612 | 0.1034 | 0.0018 | 1254 | 110 | 789  | 29 | 635  | 10 | 124.3 | Discordant |    |
| D1-51 | 2063 | 2408 | 0.99 | 0.0969 | 0.0048 | 0.9318 | 0.0428 | 0.0698 | 0.0012 | 1565 | 95  | 669  | 22 | 435  | 7  | 153.8 | Discordant |    |
| D1-52 | 514  | 489  | 0.95 | 0.0661 | 0.0020 | 1.237  | 0.0343 | 0.1358 | 0.0025 | 808  | 30  | 817  | 16 | 821  | 14 | 99.5  | 821        | 14 |
| D1-53 | 953  | 616  | 0.65 | 0.0824 | 0.0042 | 1.307  | 0.0632 | 0.1151 | 0.0020 | 1254 | 103 | 849  | 28 | 702  | 11 | 120.9 | Discordant |    |
| D1-54 | 998  | 505  | 0.51 | 0.0783 | 0.0038 | 1.171  | 0.0522 | 0.1085 | 0.0019 | 1154 | 98  | 787  | 24 | 664  | 11 | 118.5 | Discordant |    |
| D1-55 | 64   | 29   | 0.45 | 0.0698 | 0.0073 | 1.472  | 0.1423 | 0.1531 | 0.0077 | 921  | 118 | 919  | 58 | 918  | 43 | 100.1 | 918        | 43 |
| D1-56 | 1431 | 1671 | 1.17 | 0.0912 | 0.0019 | 1.195  | 0.0214 | 0.0950 | 0.0014 | 1451 | 16  | 798  | 10 | 585  | 8  | 136.4 | Discordant |    |
| D1-57 | 1325 | 1343 | 1.01 | 0.0921 | 0.0023 | 1.098  | 0.0241 | 0.0865 | 0.0014 | 1470 | 19  | 752  | 12 | 535  | 9  | 140.6 | Discordant |    |
| D1-58 | 1324 | 1385 | 1.05 | 0.0785 | 0.0017 | 1.073  | 0.0209 | 0.0991 | 0.0015 | 1161 | 18  | 740  | 10 | 609  | 9  | 121.5 | Discordant |    |
| D1-59 | 1058 | 815  | 0.77 | 0.0848 | 0.0039 | 1.240  | 0.0525 | 0.1061 | 0.0018 | 1310 | 91  | 819  | 24 | 650  | 10 | 126.0 | Discordant |    |
| D1-60 | 722  | 780  | 1.08 | 0.0796 | 0.0032 | 1.470  | 0.0529 | 0.1340 | 0.0032 | 1186 | 36  | 918  | 22 | 811  | 18 | 113.2 | Discordant |    |
| D1-61 | 1204 | 755  | 0.63 | 0.0778 | 0.0042 | 1.141  | 0.0581 | 0.1063 | 0.0020 | 1142 | 111 | 773  | 28 | 651  | 12 | 118.7 | Discordant |    |
| D1-62 | 648  | 183  | 0.28 | 0.1170 | 0.0017 | 5.699  | 0.0764 | 0.3534 | 0.0048 | 1910 | 11  | 1931 | 12 | 1951 | 23 | 97.9  | 1910       | 11 |
| D1-63 | 690  | 437  | 0.63 | 0.0751 | 0.0052 | 1.347  | 0.0677 | 0.1302 | 0.0028 | 1070 | 142 | 866  | 38 | 789  | 16 | 109.8 | 789        | 16 |
| D1-64 | 733  | 513  | 0.70 | 0.0710 | 0.0042 | 1.311  | 0.0736 | 0.1340 | 0.0024 | 956  | 124 | 850  | 32 | 811  | 14 | 104.8 | 811        | 14 |
| D1-65 | 2573 | 499  | 0.19 | 0.1079 | 0.0012 | 2.823  | 0.0273 | 0.1897 | 0.0021 | 1765 | 9   | 1362 | 7  | 1120 | 12 | 157.6 | Discordant |    |
| D1-66 | 1598 | 2987 | 1.87 | 0.1297 | 0.0028 | 1.212  | 0.0220 | 0.0678 | 0.0011 | 2093 | 14  | 806  | 7  | 423  | 7  | 190.5 | Discordant |    |
| D1-67 | 452  | 896  | 1.98 | 0.0761 | 0.0023 | 1.356  | 0.0367 | 0.1292 | 0.0024 | 1098 | 27  | 870  | 16 | 784  | 14 | 111.0 | Discordant |    |
| D1-68 | 899  | 802  | 0.89 | 0.0880 | 0.0021 | 1.354  | 0.0280 | 0.1116 | 0.0018 | 1383 | 19  | 869  | 12 | 682  | 10 | 127.4 | Discordant |    |
| D1-69 | 1427 | 1015 | 0.71 | 0.1003 | 0.0022 | 1.011  | 0.0191 | 0.0731 | 0.0011 | 1630 | 16  | 710  | 10 | 455  | 7  | 156.0 | Discordant |    |
| D1-70 | 1220 | 1028 | 0.84 | 0.0461 | 0.0106 | 0.4843 | 0.1111 | 0.0763 | 0.0017 |      | 380 | 401  | 76 | 474  | 10 | 84.6  | Discordant |    |
| D1-71 | 1408 | 1702 | 1.21 | 0.0926 | 0.0020 | 1.187  | 0.0220 | 0.0930 | 0.0014 | 1480 | 16  | 795  | 10 | 573  | 8  | 138.7 | Discordant |    |
| D1-72 | 178  | 134  | 0.75 | 0.0766 | 0.0040 | 1.423  | 0.0663 | 0.1348 | 0.0040 | 1110 | 49  | 899  | 28 | 815  | 23 | 110.3 | Disc       |    |

|        |        |        |      |        |        |        |        |        |        |      |     |      |     |      |    |       |            |    |
|--------|--------|--------|------|--------|--------|--------|--------|--------|--------|------|-----|------|-----|------|----|-------|------------|----|
| D1-97  | 182    | 122    | 0.67 | 0.1071 | 0.0028 | 4.951  | 0.1189 | 0.3355 | 0.0067 | 1750 | 20  | 1811 | 20  | 1865 | 32 | 93.8  | 1750       | 20 |
| D1-98  | 808    | 463    | 0.57 | 0.0731 | 0.0020 | 1.307  | 0.0321 | 0.1296 | 0.0022 | 1018 | 24  | 849  | 14  | 785  | 13 | 108.2 | 785        | 13 |
| D1-99  | 809    | 1013   | 1.25 | 0.0819 | 0.0020 | 1.227  | 0.0265 | 0.1086 | 0.0018 | 1244 | 20  | 813  | 12  | 664  | 10 | 122.4 | Discordant |    |
| D1-100 | 259    | 197    | 0.76 | 0.0975 | 0.0024 | 3.855  | 0.0862 | 0.2868 | 0.0052 | 1576 | 19  | 1604 | 18  | 1626 | 26 | 96.9  | 1576       | 19 |
| D1-101 | 982    | 684    | 0.70 | 0.0733 | 0.0016 | 1.182  | 0.0236 | 0.1170 | 0.0017 | 1022 | 19  | 792  | 11  | 713  | 10 | 111.1 | Discordant |    |
| D1-102 | 574    | 167    | 0.29 | 0.0630 | 0.0018 | 1.178  | 0.0304 | 0.1356 | 0.0023 | 709  | 28  | 790  | 14  | 820  | 13 | 96.3  | 820        | 13 |
| D1-103 | 1622   | 1529   | 0.94 | 0.0873 | 0.0015 | 1.055  | 0.0165 | 0.0876 | 0.0012 | 1367 | 13  | 731  | 8   | 542  | 7  | 134.9 | Discordant |    |
| D1-104 | 585    | 439    | 0.75 | 0.0720 | 0.0061 | 1.296  | 0.1067 | 0.1306 | 0.0026 | 985  | 178 | 844  | 47  | 792  | 15 | 106.6 | 792        | 15 |
| D1-105 | 1628   | 2076   | 1.28 | 0.0993 | 0.0018 | 1.138  | 0.0177 | 0.0831 | 0.0011 | 1610 | 13  | 771  | 8   | 515  | 7  | 149.7 | Discordant |    |
| D1-106 | 733    | 863    | 1.18 | 0.0693 | 0.0018 | 1.130  | 0.0268 | 0.1182 | 0.0019 | 909  | 24  | 768  | 13  | 720  | 11 | 106.7 | 720        | 11 |
| D1-107 | 822    | 518    | 0.63 | 0.0879 | 0.0020 | 1.321  | 0.0273 | 0.1090 | 0.0017 | 1380 | 19  | 855  | 12  | 667  | 10 | 128.2 | Discordant |    |
| D1-108 | 929    | 621    | 0.67 | 0.0895 | 0.0019 | 1.436  | 0.0274 | 0.1163 | 0.0018 | 1416 | 17  | 904  | 11  | 709  | 10 | 127.5 | Discordant |    |
| D1-109 | 1161   | 807    | 0.70 | 0.0845 | 0.0019 | 1.280  | 0.0256 | 0.1098 | 0.0017 | 1305 | 18  | 837  | 11  | 672  | 10 | 124.6 | Discordant |    |
| D1-110 | 1248   | 1216   | 0.97 | 0.0873 | 0.0020 | 1.138  | 0.0226 | 0.0946 | 0.0015 | 1367 | 18  | 772  | 11  | 582  | 9  | 132.6 | Discordant |    |
| D1-111 | 720    | 268    | 0.37 | 0.0697 | 0.0016 | 1.303  | 0.0271 | 0.1356 | 0.0021 | 920  | 20  | 847  | 12  | 820  | 12 | 103.3 | 820        | 12 |
| D1-112 | 580    | 539    | 0.93 | 0.0905 | 0.0033 | 1.424  | 0.0455 | 0.1142 | 0.0026 | 1435 | 30  | 899  | 19  | 697  | 15 | 129.0 | Discordant |    |
| D1-113 | 679    | 602    | 0.89 | 0.0736 | 0.0023 | 1.239  | 0.0342 | 0.1221 | 0.0023 | 1030 | 28  | 818  | 16  | 743  | 13 | 110.1 | Discordant |    |
| D1-114 | 842    | 545    | 0.65 | 0.0806 | 0.0021 | 1.220  | 0.0287 | 0.1098 | 0.0019 | 1211 | 22  | 810  | 13  | 672  | 11 | 120.5 | Discordant |    |
| D1-115 | 575    | 353    | 0.61 | 0.0736 | 0.0125 | 1.477  | 0.2464 | 0.1456 | 0.0051 | 1030 | 373 | 921  | 101 | 876  | 28 | 105.1 | 876        | 28 |
| D1-116 | 1464   | 1191   | 0.81 | 0.0974 | 0.0026 | 1.213  | 0.0285 | 0.0903 | 0.0016 | 1575 | 20  | 807  | 13  | 557  | 10 | 144.9 | Discordant |    |
| D1-117 | 1010   | 1164   | 1.15 | 0.0942 | 0.0025 | 1.442  | 0.0337 | 0.1110 | 0.0020 | 1513 | 21  | 907  | 14  | 678  | 11 | 133.8 | Discordant |    |
| D1-118 | 715    | 405    | 0.57 | 0.0725 | 0.0075 | 1.133  | 0.1113 | 0.1134 | 0.0036 | 999  | 218 | 769  | 53  | 692  | 21 | 111.1 | Discordant |    |
| D1-119 | 438    | 304    | 0.69 | 0.1445 | 0.0022 | 8.536  | 0.1188 | 0.4286 | 0.0063 | 2281 | 11  | 2290 | 13  | 2299 | 28 | 99.2  | 2281       | 11 |
| D1-120 | 367    | 97     | 0.26 | 0.0636 | 0.0025 | 1.155  | 0.0415 | 0.1317 | 0.0029 | 728  | 41  | 779  | 20  | 798  | 16 | 97.6  | 798        | 16 |
| D1-121 | 132    | 72     | 0.54 | 0.0725 | 0.0045 | 1.298  | 0.0729 | 0.1300 | 0.0044 | 999  | 61  | 845  | 32  | 788  | 25 | 107.2 | 788        | 25 |
| D1-122 | 1146   | 817    | 0.71 | 0.0885 | 0.0027 | 1.301  | 0.0355 | 0.1066 | 0.0021 | 1394 | 25  | 846  | 16  | 653  | 12 | 129.6 | Discordant |    |
| D1-123 | 698    | 718    | 1.03 | 0.0808 | 0.0056 | 1.391  | 0.0917 | 0.1248 | 0.0026 | 1217 | 140 | 885  | 39  | 758  | 15 | 116.8 | Discordant |    |
| D1-124 | 577    | 316    | 0.55 | 0.0659 | 0.0019 | 1.262  | 0.0335 | 0.1390 | 0.0024 | 802  | 28  | 829  | 15  | 839  | 14 | 98.8  | 839        | 14 |
| D1-125 | 724    | 495    | 0.68 | 0.0679 | 0.0042 | 1.162  | 0.0677 | 0.1242 | 0.0024 | 865  | 131 | 783  | 32  | 754  | 14 | 103.8 | 754        | 14 |
| D1-126 | 1192   | 1122   | 0.94 | 0.1299 | 0.0020 | 4.600  | 0.0627 | 0.2568 | 0.0036 | 2097 | 11  | 1749 | 11  | 1474 | 18 | 142.3 | Discordant |    |
| D1-127 | 692    | 392    | 0.57 | 0.0676 | 0.0023 | 1.179  | 0.0357 | 0.1265 | 0.0025 | 858  | 32  | 791  | 17  | 768  | 14 | 103.0 | 768        | 14 |
| D1-128 | 124    | 101    | 0.81 | 0.0657 | 0.0040 | 1.205  | 0.0669 | 0.1331 | 0.0041 | 795  | 66  | 803  | 31  | 806  | 23 | 99.6  | 806        | 23 |
| D1-129 | 993    | 623    | 0.63 | 0.0802 | 0.0020 | 1.299  | 0.0290 | 0.1174 | 0.0019 | 1202 | 21  | 845  | 13  | 716  | 11 | 118.0 | Discordant |    |
| D1-130 | 220    | 227    | 0.78 | 0.0724 | 0.0026 | 1.350  | 0.0445 | 0.1353 | 0.0029 | 987  | 34  | 868  | 19  | 818  | 17 | 106.1 | 818        | 17 |
| D1-131 | 872    | 418    | 0.48 | 0.0646 | 0.0025 | 1.083  | 0.0383 | 0.1217 | 0.0026 | 761  | 40  | 745  | 19  | 740  | 15 | 100.7 | 740        | 15 |
| D1-132 | 565    | 696    | 1.23 | 0.1236 | 0.0052 | 1.366  | 0.0480 | 0.0802 | 0.0022 | 2009 | 29  | 874  | 21  | 497  | 13 | 175.9 | Discordant |    |
| D1-133 | 1011   | 419    | 0.41 | 0.0692 | 0.0016 | 1.217  | 0.0252 | 0.1275 | 0.0019 | 906  | 20  | 808  | 12  | 774  | 11 | 104.4 | 774        | 11 |
| D1-134 | 152    | 165    | 1.09 | 0.0663 | 0.0034 | 1.266  | 0.0590 | 0.1386 | 0.0039 | 815  | 53  | 831  | 26  | 837  | 22 | 99.3  | 837        | 22 |
| D1-135 | 935    | 845    | 0.90 | 0.0703 | 0.0038 | 1.136  | 0.0549 | 0.1173 | 0.0034 | 936  | 53  | 770  | 26  | 715  | 20 | 107.7 | 715        | 20 |
| D1-136 | 1288   | 1631   | 1.27 | 0.0835 | 0.0018 | 0.8981 | 0.0173 | 0.0781 | 0.0012 | 1280 | 17  | 651  | 9   | 484  | 7  | 134.5 | Discordant |    |
| D1-137 | 710    | 408    | 0.57 | 0.0670 | 0.0017 | 1.225  | 0.0278 | 0.1327 | 0.0021 | 837  | 23  | 812  | 13  | 803  | 12 | 101.1 | 803        | 12 |
| D1-138 | 1113   | 1484   | 1.33 | 0.0888 | 0.0023 | 1.027  | 0.0233 | 0.0839 | 0.0014 | 1400 | 20  | 717  | 12  | 519  | 9  | 138.2 | Discordant |    |
| D1-139 | 554173 | 892420 | 1.61 | 0.0720 | 0.0223 | 1.156  | 0.3519 | 0.1165 | 0.0070 | 985  | 653 | 780  | 166 | 710  | 41 | 109.9 | 710        | 41 |
| D1-140 | 880    | 912    | 1.04 | 0.0710 | 0.0018 | 1.234  | 0.0288 | 0.1260 | 0.0021 | 958  | 23  | 816  | 13  | 765  | 12 | 106.7 | 765        | 12 |
| D1-141 | 884    | 848    | 0.96 | 0.0838 | 0.0023 | 1.434  | 0.0356 | 0.1241 | 0.0022 | 1288 | 23  | 903  | 15  | 754  | 13 | 119.8 | Discordant |    |
| D1-142 | 86     | 132    | 1.53 | 0.0708 | 0.0047 | 1.305  | 0.0776 | 0.1336 | 0.0047 | 953  | 66  | 848  | 34  | 808  | 27 | 105.0 | 808        | 27 |
| D1-143 | 754    | 907    | 1.20 | 0.0753 | 0.0022 | 1.435  | 0.0370 | 0.1382 | 0.0025 | 1077 | 25  | 904  | 15  | 834  | 14 | 108.4 | 834        | 14 |
| D1-144 | 1084   | 653    | 0.60 | 0.0753 | 0.0017 | 1.244  | 0.0252 | 0.1199 | 0.0018 | 1077 | 19  | 821  | 11  | 730  | 10 | 112.5 | Discordant |    |
| D1-145 | 2888   | 1552   | 0.54 | 0.1112 | 0.0013 | 2.339  | 0.0251 | 0.1526 | 0.0018 | 1820 | 10  | 1224 | 8   | 915  | 10 | 133.8 | Discordant |    |
| D1-146 | 1367   | 2521   | 1.84 | 0.0882 | 0.0026 | 1.055  | 0.0270 | 0.0868 | 0.0016 | 1387 | 24  | 732  | 13  | 537  | 10 | 136.3 | Discordant |    |
| D1-147 | 868    | 399    | 0.46 | 0.1077 | 0.0014 | 4.930  | 0.0605 | 0.3321 | 0.0042 | 1761 | 10  | 1807 | 10  | 1848 | 20 | 95.3  | 1761       | 10 |
| D1-148 | 2398   | 2394   | 1.00 | 0.0876 | 0.0019 | 0.8973 | 0.0168 | 0.0743 | 0.0011 | 1373 | 16  | 650  | 9   | 462  | 7  | 140.7 | Discordant |    |
| D1-149 | 341    | 179    | 0.52 | 0.0721 | 0.0024 | 1.419  | 0.0427 | 0.1428 | 0.0028 | 988  | 31  | 897  | 18  | 861  | 16 | 104.2 | 861        | 16 |
| D1-150 | 639    | 471    | 0.74 | 0.0763 | 0.0024 | 1.323  | 0.0368 | 0.1258 | 0.0024 | 1104 | 28  | 856  | 16  | 764  | 14 | 112.0 | Discordant |    |

Sample XJ063-9, sandstone, Middle-Late Ordovician Charchag Formation in south Qurqutagh of northern Tarim, (Dong et al., 2014, Chinese Science Bulletin)

|    |     |      |      |        |        |        |        |        |        |      |     |      |     |      |    |       |            |    |
|----|-----|------|------|--------|--------|--------|--------|--------|--------|------|-----|------|-----|------|----|-------|------------|----|
| 1  | 234 | 470  | 0.50 | 0.0708 | 0.0041 | 1.409  | 0.0738 | 0.1445 | 0.0045 | 953  | 59  | 893  | 31  | 870  | 25 | 102.6 | 870        | 25 |
| 2  | 254 | 214  | 1.19 | 0.0633 | 0.0134 | 0.9535 | 0.1850 | 0.1094 | 0.0109 | 718  | 251 | 680  | 96  | 669  | 64 | 101.6 | 669        | 64 |
| 3  | 105 | 203  | 0.51 | 0.0621 | 0.0065 | 1.102  | 0.1061 | 0.1290 | 0.0066 | 677  | 121 | 754  | 51  | 782  | 37 | 96.4  | 782        | 37 |
| 4  | 97  | 135  | 0.71 | 0.1075 | 0.0049 | 4.757  | 0.2002 | 0.3215 | 0.0104 | 1757 | 36  | 1777 | 35  | 1797 | 50 | 97.8  | 1757       | 36 |
| 5  | 262 | 618  | 0.42 | 0.0662 | 0.0052 | 1.135  | 0.0853 | 0.1244 | 0.0029 | 811  | 170 | 770  | 41  | 756  | 17 | 101.9 | 756        | 17 |
| 6  | 240 | 331  | 0.73 | 0.0913 | 0.0030 | 3.235  | 0.0973 | 0.2575 | 0.0056 | 1452 | 27  | 1466 | 23  | 1477 | 29 | 98.3  | 1452       | 27 |
| 7  | 583 | 419  | 1.39 | 0.0656 | 0.0026 | 1.188  | 0.0439 | 0.1316 | 0.0029 | 792  | 42  | 795  | 20  | 797  | 17 | 99.7  | 797        | 17 |
| 8  | 404 | 535  | 0.75 | 0.1991 | 0.0027 | 14.762 | 0.1966 | 0.5387 | 0.0080 | 2819 | 11  | 2800 | 13  | 2778 | 34 | 101.5 | 2819       | 11 |
| 9  | 856 | 728  | 1.18 | 0.1055 | 0.0049 | 4.427  | 0.1902 | 0.3045 | 0.0052 | 1722 | 87  | 1717 | 36  | 1714 | 26 | 100.5 | 1722       | 87 |
| 10 | 215 | 848  | 0.25 | 0.1151 | 0.0016 | 5.753  | 0.0763 | 0.3630 | 0.0048 | 1882 | 11  | 1939 | 11  | 1996 | 23 | 94.3  | 1882       | 11 |
| 11 | 832 | 292  | 2.85 | 0.0638 | 0.0033 | 1.082  | 0.0509 | 0.1233 | 0.0033 | 734  | 56  | 745  | 25  | 749  | 19 | 99.5  | 749        | 19 |
| 12 | 208 | 841  | 0.25 | 0.0690 | 0.0020 | 0.9728 | 0.0256 | 0.1024 | 0.0017 | 900  | 28  | 690  | 13  | 628  | 10 | 109.9 | 628        | 10 |
| 13 | 246 | 601  | 0.41 | 0.0706 | 0.0018 | 1.611  | 0.0376 | 0.1658 | 0.0027 | 946  | 24  | 975  | 15  | 989  | 15 | 98.6  | 989        | 15 |
| 14 | 279 | 272  | 1.03 | 0.0667 | 0.0041 | 1.257  | 0.0702 | 0.1368 | 0.0044 | 829  | 64  | 827  | 32  | 827  | 25 | 100.8 | 827        | 25 |
| 15 | 138 | 252  | 0.55 | 0.2058 | 0.0042 | 14.778 | 0.2873 | 0.5217 | 0.0105 | 2873 | 15  | 2801 | 18  | 2706 | 45 | 106.2 | 2873       | 15 |
| 17 | 250 | 318  | 0.78 | 0.1560 | 0.0029 | 10.062 | 0.1776 | 0.4685 | 0.0082 | 2413 | 14  | 2441 | 16  | 2477 | 36 | 97.4  | 2413       | 14 |
| 18 | 101 | 138  | 0.73 | 0.1140 | 0.0044 | 4.976  | 0.1752 | 0.3170 | 0.0088 | 1864 | 29  | 1815 | 30  | 1775 | 43 | 105.0 | 1864       | 29 |
| 19 | 118 | 123  | 0.96 | 0.0703 | 0.0056 | 1.206  | 0.0870 | 0.1246 | 0.0053 | 937  | 82  | 803  | 40  | 757  | 30 | 106.1 | 757        | 30 |
| 20 | 315 | 594  | 0.53 | 0.0680 | 0.0024 | 1.218  | 0.0390 | 0.1301 | 0.0026 | 868  | 35  | 809  | 18  | 789  | 15 | 102.5 | 789        | 15 |
| 21 | 228 | 230  | 0.99 | 0.0679 | 0.0038 | 1.505  | 0.0772 | 0.1609 | 0.0049 | 867  | 58  | 933  | 31  | 962  | 27 | 97.0  | 962        | 27 |
| 22 | 229 | 218  | 1.05 | 0.0652 | 0.0050 | 1.172  | 0.0820 | 0.1306 | 0.0049 | 781  | 85  | 788  | 38  | 791  | 28 | 98.6  | 791        | 28 |
| 24 | 596 | 730  | 0.82 | 0.0576 | 0.0027 | 0.7068 | 0.0302 | 0.0891 | 0.0021 | 516  | 54  | 543  | 18  | 550  | 12 | 98.7  | 550        | 12 |
| 25 | 127 | 87   | 1.45 | 0.0738 | 0.0063 | 1.290  | 0.1016 | 0.1268 | 0.0054 | 1038 | 92  | 841  | 45  | 770  | 31 | 109.2 | 770        | 31 |
| 26 | 549 | 299  | 1.84 | 0.0672 | 0.0035 | 1.172  | 0.0560 | 0.1267 | 0.0035 | 843  | 55  | 788  | 26  | 769  | 20 | 102.5 | 769        | 20 |
| 27 | 202 | 810  | 0.25 | 0.1327 | 0.0031 | 7.045  | 0.1285 | 0.3852 | 0.0056 | 2133 | 42  | 2117 | 16  | 2101 | 26 | 101.5 | 2133       | 42 |
| 28 | 256 | 173  | 1.48 | 0.0648 | 0.0047 | 1.026  | 0.0684 | 0.1151 | 0.0042 | 767  | 81  | 717  | 34  | 702  | 24 | 102.1 | 702        | 24 |
| 29 | 66  | 120  | 0.55 | 0.1091 | 0.0048 | 4.770  | 0.1924 | 0.3175 | 0.0098 | 1785 | 34  | 1780 | 34  | 1777 | 48 | 100.5 | 1785       | 34 |
| 30 | 49  | 53   | 0.92 | 0.0722 | 0.0192 | 1.306  | 0.3364 | 0.1311 | 0.0086 | 992  | 566 | 848  | 148 | 794  | 49 | 106.8 | 794        | 49 |
| 31 | 307 | 377  | 0.81 | 0.0635 | 0.0031 | 1.113  | 0.0494 | 0.1273 | 0.0033 | 726  | 52  | 760  | 24  | 772  | 19 | 98.4  | 772        | 19 |
| 32 | 357 | 600  | 0.59 | 0.1267 | 0.0020 | 6.291  | 0.0895 | 0.3608 | 0.0051 | 2052 | 11  | 2017 | 12  | 1986 | 24 | 103.3 | 2052       | 11 |
| 33 | 81  | 50   | 1.62 | 0.0674 | 0.0077 | 1.183  | 0.1264 | 0.1273 | 0.0066 | 851  | 138 | 792  | 59  | 773  | 38 | 102.5 | 773        | 38 |
| 34 | 876 | 538  | 1.63 | 0.1200 | 0.0019 | 6.250  | 0.0933 | 0.3782 | 0.0054 | 1957 | 12  | 2011 | 13  | 2068 | 25 | 94.6  | 1957       | 12 |
| 35 | 390 | 245  | 1.60 | 0.0708 | 0.0035 | 1.161  | 0.0528 | 0.1190 | 0.0031 | 953  | 52  | 782  | 25  | 725  | 18 | 107.9 | 925        | 18 |
| 36 | 140 | 720  | 0.19 | 0.1224 | 0.0026 | 5.984  | 0.0983 | 0.3546 | 0.0048 | 1991 | 39  | 1974 | 14  | 1957 | 23 | 101.7 | 1991       | 39 |
| 37 | 169 | 223  | 0.76 | 0.0622 | 0.0042 | 0.9939 | 0.0612 | 0.1161 | 0.0039 | 680  | 75  | 701  | 31  | 708  | 23 | 99.0  | 708        | 23 |
| 38 | 498 | 344  | 1.45 | 0.0671 | 0.0026 | 1.161  | 0.0406 | 0.1258 | 0.0027 | 840  | 39  | 783  | 19  | 764  | 15 | 102.5 | 764        | 15 |
| 40 | 214 | 410  | 0.52 | 0.0673 | 0.0022 | 1.389  | 0.0409 | 0.1498 | 0.0028 | 848  | 32  | 884  | 17  | 900  | 16 | 98.2  | 900        | 16 |
| 41 | 297 | 241  | 1.23 | 0.0674 | 0.0031 | 1.115  | 0.0472 | 0.1201 | 0.0030 | 851  | 48  | 760  | 23  | 731  | 17 | 104.0 | 731        | 17 |
| 42 | 250 | 608  | 0.41 | 0.1344 | 0.0035 | 7.086  | 0.1504 | 0.3823 | 0.0057 | 2157 | 46  | 2122 | 19  | 2087 | 26 | 103.4 | 2157       | 46 |
| 43 | 223 | 597  | 0.37 | 0.0731 | 0.0017 | 1.764  | 0.0384 | 0.1752 | 0.0027 | 1017 | 21  | 1032 | 14  | 1041 | 15 | 97.7  | 1017       | 21 |
| 44 | 212 | 161  | 1.32 | 0.0653 | 0.0041 | 1.082  | 0.0616 | 0.1203 | 0.0038 | 785  | 68  | 745  | 30  | 732  | 22 | 101.8 | 732        | 22 |
| 45 | 146 | 303  | 0.48 | 0.1010 | 0.0023 | 4.247  | 0.0904 | 0.3053 | 0.0053 | 1643 | 18  | 1683 | 17  | 1718 | 26 | 95.6  | 1643       | 18 |
| 46 | 121 | 83   | 1.47 | 0.0608 | 0.0053 | 1.058  | 0.0867 | 0.1264 | 0.0050 | 632  | 109 | 733  | 43  | 767  | 29 | 95.6  | 767        | 29 |
| 47 | 40  | 43   | 0.92 | 0.0600 | 0.0082 | 0.9875 | 0.1279 | 0.1196 | 0.0065 | 602  | 189 | 697  | 65  | 728  | 37 | 95.7  | 728        | 37 |
| 48 | 983 | 1106 | 0.89 | 0.0991 | 0.0013 | 3.755  | 0.0467 | 0.2753 | 0.0034 | 1606 | 11  | 1583 | 10  | 1568 | 17 | 102.4 | 1606       | 11 |
| 49 | 123 | 104  | 1.18 | 0.1241 | 0.0042 | 6.202  | 0.1961 | 0.3631 | 0.0095 | 2015 | 25  | 2005 | 28  | 1997 | 45 | 100.9 | 2015       | 25 |
| 50 | 110 | 71   | 1.54 | 0.0759 | 0.0062 | 1.382  | 0.1021 | 0.1322 | 0.0056 | 1093 | 83  | 881  | 44  | 800  | 32 | 110.1 | Discordant |    |
| 51 | 215 | 432  | 0.50 | 0.1212 | 0.0022 | 6.027  | 0.1003 | 0.3612 | 0.0056 | 1974 | 13  | 1980 | 14  | 1988 | 26 | 99.3  | 1974       | 13 |
| 52 | 55  | 181  | 0.30 | 0.1214 | 0.0030 | 6.072  | 0.1402 | 0.3631 | 0.0072 | 1977 | 18  | 1986 | 20  | 1997 | 34 | 99.0  | 1977       | 18 |
| 53 | 170 | 116  | 1.46 | 0.1233 | 0.0039 | 6.514  | 0.1914 | 0.3837 | 0.0094 | 2004 | 24  | 2048 | 26  | 2094 | 44 | 95.7  | 2004       | 24 |
| 54 | 276 | 357  | 0.77 | 0.0680 | 0.0038 | 1.094  | 0.0551 | 0.1169 | 0.0034 | 868  | 58  | 750  | 27  | 712  | 20 | 103.3 | 712        | 20 |
| 55 | 554 | 965  | 0.57 | 0.0831 | 0.0019 | 2.649  | 0.0555 | 0.2314 | 0.0037 | 1272 | 19  | 1314 | 15  | 1342 | 19 | 94.8  | 1272       | 19 |
| 56 | 202 | 818  | 0.25 | 0.1208 | 0.0020 | 5.744  | 0.0880 | 0.3454 | 0.0050 | 1967 | 12  | 1938 | 13  | 1913 | 24 | 102.8 | 1967       | 12 |
| 57 | 224 | 557  | 0.40 | 0.1069 | 0.0019 | 4.732  | 0.0756 | 0.3214 | 0.0046 | 1747 | 13  | 1773 | 13  | 1797 | 23 | 97.2  | 1747       | 13 |
| 58 | 126 | 272  | 0.46 | 0.1133 | 0.0028 | 5.630  | 0.1276 | 0.3608 | 0.0069 | 1853 | 18  | 1921 | 20  | 1986 | 33 | 93.3  | 1853       | 18 |
| 59 | 486 | 983  | 0.49 | 0.0627 | 0.0021 | 0.8056 | 0.0248 | 0.0934 | 0.0017 | 696  | 35  | 600  | 14  | 575  | 10 | 104.3 | 575        | 10 |
| 61 | 32  | 55   | 0.58 | 0.1074 | 0.0057 | 4.699  | 0.2299 | 0.3176 | 0.0117 | 1756 | 42  | 1767 | 41  | 1778 | 57 | 98.8  | 1756       | 42 |
| 62 | 251 | 117  | 2.15 | 0.0663 | 0.0045 | 1.153  | 0.0712 | 0.1264 | 0.0044 | 815  | 73  | 779  | 34  | 767  | 25 | 101.6 | 767        | 25 |
| 63 | 562 | 600  | 0.94 | 0.0643 | 0.0018 | 1.152  | 0.0292 | 0.1301 | 0.0021 | 751  | 28  | 778  | 14  | 789  | 12 | 98.6  | 789        | 12 |
| 64 | 132 | 174  | 0.76 | 0.1068 | 0.0033 | 4.723  | 0.1351 | 0.3211 | 0.0072 | 1745 | 24  | 1771 | 24  | 1795 | 35 | 97.2  | 1745       | 24 |
| 65 | 150 | 133  | 1.13 | 0.0652 | 0.0048 | 1.184  | 0.0795 | 0.1318 | 0.0048 | 780  | 81  | 793  | 37  | 798  | 28 | 99.4  | 798        | 28 |
| 66 | 94  | 193  | 0.48 | 0.0758 | 0.0037 | 1.869  | 0.0825 | 0.1790 | 0.0050 | 1090 | 46  | 1070 | 29  | 1061 | 27 | 102.7 | 1090       | 46 |
| 67 | 494 | 378  | 1.31 | 0.0613 | 0.0027 | 1.082  | 0.0435 | 0.1283 | 0.0029 | 648  | 48  | 745  | 21  | 778  | 17 | 95.8  | 778        | 17 |



|     |      |      |      |        |        |        |        |        |        |      |     |      |    |      |    |       |            |    |
|-----|------|------|------|--------|--------|--------|--------|--------|--------|------|-----|------|----|------|----|-------|------------|----|
| 68  | 502  | 435  | 1.15 | 0.0641 | 0.0025 | 1.071  | 0.0386 | 0.1213 | 0.0026 | 746  | 42  | 739  | 19 | 738  | 15 | 100.1 | 738        | 15 |
| 69  | 209  | 117  | 1.80 | 0.0571 | 0.0044 | 0.9592 | 0.0694 | 0.1219 | 0.0043 | 496  | 98  | 683  | 36 | 742  | 25 | 92.0  | 742        | 25 |
| 70  | 112  | 165  | 0.68 | 0.0739 | 0.0099 | 1.265  | 0.1617 | 0.1242 | 0.0048 | 1039 | 285 | 830  | 72 | 754  | 27 | 110.1 | Discordant |    |
| 71  | 84   | 849  | 0.10 | 0.1175 | 0.0016 | 5.629  | 0.0726 | 0.3477 | 0.0045 | 1919 | 11  | 1921 | 11 | 1923 | 22 | 99.8  | 1919       | 11 |
| 72  | 118  | 488  | 0.24 | 0.1156 | 0.0020 | 5.528  | 0.0887 | 0.3471 | 0.0052 | 1890 | 13  | 1905 | 14 | 1921 | 25 | 98.4  | 1890       | 13 |
| 73  | 349  | 673  | 0.52 | 0.0649 | 0.0020 | 1.184  | 0.0337 | 0.1324 | 0.0024 | 771  | 32  | 793  | 16 | 802  | 13 | 98.9  | 802        | 13 |
| 74  | 223  | 81   | 2.77 | 0.0662 | 0.0054 | 1.107  | 0.0831 | 0.1215 | 0.0048 | 811  | 92  | 757  | 40 | 739  | 28 | 102.4 | 739        | 28 |
| 75  | 224  | 544  | 0.41 | 0.1256 | 0.0020 | 6.636  | 0.0970 | 0.3834 | 0.0055 | 2038 | 12  | 2064 | 13 | 2092 | 25 | 97.4  | 2038       | 12 |
| 76  | 94   | 144  | 0.65 | 0.0710 | 0.0046 | 1.327  | 0.0780 | 0.1357 | 0.0046 | 958  | 66  | 858  | 34 | 820  | 26 | 104.6 | 820        | 26 |
| 77  | 412  | 130  | 3.17 | 0.0640 | 0.0044 | 1.084  | 0.0687 | 0.1229 | 0.0041 | 742  | 79  | 746  | 33 | 747  | 24 | 99.9  | 747        | 24 |
| 78  | 308  | 225  | 1.37 | 0.0671 | 0.0039 | 1.253  | 0.0663 | 0.1355 | 0.0041 | 842  | 62  | 825  | 30 | 819  | 23 | 100.7 | 819        | 23 |
| 79  | 208  | 394  | 0.53 | 0.0684 | 0.0023 | 1.249  | 0.0381 | 0.1326 | 0.0026 | 879  | 33  | 823  | 17 | 803  | 15 | 102.5 | 803        | 15 |
| 80  | 88   | 289  | 0.31 | 0.1329 | 0.0029 | 6.674  | 0.1355 | 0.3644 | 0.0067 | 2137 | 16  | 2069 | 18 | 2003 | 32 | 106.7 | 2137       | 16 |
| 81  | 294  | 364  | 0.81 | 0.0667 | 0.0028 | 1.098  | 0.0426 | 0.1195 | 0.0027 | 827  | 44  | 752  | 21 | 728  | 16 | 103.3 | 728        | 16 |
| 82  | 443  | 1691 | 0.26 | 0.0664 | 0.0012 | 1.141  | 0.0194 | 0.1246 | 0.0016 | 819  | 17  | 773  | 9  | 757  | 9  | 102.1 | 757        | 9  |
| 83  | 124  | 243  | 0.51 | 0.1225 | 0.0026 | 6.092  | 0.1185 | 0.3610 | 0.0063 | 1993 | 15  | 1989 | 17 | 1987 | 30 | 100.3 | 1993       | 15 |
| 84  | 300  | 288  | 1.04 | 0.0617 | 0.0026 | 1.064  | 0.0414 | 0.1251 | 0.0028 | 665  | 46  | 736  | 20 | 760  | 16 | 96.8  | 760        | 16 |
| 85  | 412  | 298  | 1.38 | 0.1660 | 0.0029 | 10.968 | 0.1843 | 0.4796 | 0.0081 | 2517 | 13  | 2520 | 16 | 2526 | 35 | 99.6  | 2517       | 13 |
| 86  | 395  | 430  | 0.92 | 0.0664 | 0.0025 | 1.268  | 0.0436 | 0.1387 | 0.0029 | 818  | 39  | 832  | 20 | 837  | 16 | 99.4  | 837        | 16 |
| 87  | 200  | 227  | 0.88 | 0.1088 | 0.0029 | 4.678  | 0.1134 | 0.3119 | 0.0062 | 1780 | 20  | 1763 | 20 | 1750 | 30 | 101.7 | 1780       | 20 |
| 89  | 410  | 592  | 0.69 | 0.0678 | 0.0019 | 1.200  | 0.0301 | 0.1284 | 0.0021 | 863  | 27  | 801  | 14 | 779  | 12 | 102.8 | 779        | 12 |
| 90  | 797  | 325  | 2.45 | 0.0641 | 0.0024 | 1.080  | 0.0375 | 0.1222 | 0.0025 | 746  | 40  | 743  | 18 | 743  | 14 | 100.0 | 743        | 14 |
| 91  | 330  | 224  | 1.47 | 0.1204 | 0.0031 | 5.832  | 0.1401 | 0.3517 | 0.0071 | 1961 | 19  | 1951 | 21 | 1943 | 34 | 100.9 | 1961       | 19 |
| 92  | 255  | 442  | 0.58 | 0.0673 | 0.0022 | 1.248  | 0.0380 | 0.1345 | 0.0026 | 848  | 33  | 822  | 17 | 814  | 15 | 101.0 | 814        | 15 |
| 93  | 219  | 283  | 0.77 | 0.1628 | 0.0029 | 10.862 | 0.1836 | 0.4842 | 0.0082 | 2485 | 13  | 2511 | 16 | 2546 | 36 | 97.6  | 2485       | 13 |
| 94  | 146  | 192  | 0.76 | 0.0699 | 0.0035 | 1.177  | 0.0532 | 0.1223 | 0.0032 | 924  | 51  | 790  | 25 | 744  | 18 | 106.2 | 744        | 18 |
| 95  | 188  | 197  | 0.95 | 0.0687 | 0.0034 | 1.192  | 0.0533 | 0.1260 | 0.0032 | 889  | 52  | 797  | 25 | 765  | 18 | 104.2 | 765        | 18 |
| 97  | 408  | 712  | 0.57 | 0.0689 | 0.0017 | 1.335  | 0.0295 | 0.1405 | 0.0021 | 897  | 23  | 861  | 13 | 847  | 12 | 101.7 | 847        | 12 |
| 98  | 132  | 835  | 0.16 | 0.0696 | 0.0015 | 1.599  | 0.0306 | 0.1666 | 0.0023 | 917  | 19  | 970  | 12 | 993  | 13 | 97.7  | 993        | 13 |
| 99  | 64   | 56   | 1.15 | 0.0731 | 0.0064 | 1.382  | 0.1100 | 0.1372 | 0.0062 | 1016 | 91  | 881  | 47 | 829  | 35 | 106.3 | 829        | 35 |
| 100 | 251  | 282  | 0.89 | 0.0690 | 0.0027 | 1.163  | 0.0412 | 0.1222 | 0.0026 | 900  | 39  | 783  | 19 | 743  | 15 | 105.4 | 743        | 15 |
| 101 | 173  | 267  | 0.65 | 0.1200 | 0.0023 | 5.959  | 0.1065 | 0.3603 | 0.0058 | 1956 | 14  | 1970 | 16 | 1984 | 28 | 98.6  | 1956       | 14 |
| 102 | 728  | 407  | 1.79 | 0.1240 | 0.0022 | 6.380  | 0.1041 | 0.3733 | 0.0057 | 2015 | 13  | 2030 | 14 | 2045 | 27 | 98.5  | 2015       | 13 |
| 104 | 235  | 318  | 0.74 | 0.0646 | 0.0027 | 1.242  | 0.0475 | 0.1395 | 0.0032 | 761  | 44  | 820  | 22 | 842  | 18 | 97.4  | 842        | 18 |
| 105 | 62   | 51   | 1.22 | 0.0562 | 0.0080 | 0.8809 | 0.1190 | 0.1138 | 0.0062 | 458  | 205 | 641  | 64 | 695  | 36 | 92.2  | 695        | 36 |
| 106 | 154  | 205  | 0.75 | 0.1126 | 0.0029 | 5.084  | 0.1190 | 0.3276 | 0.0064 | 1841 | 19  | 1833 | 20 | 1827 | 31 | 100.8 | 1841       | 19 |
| 108 | 377  | 504  | 0.75 | 0.0664 | 0.0028 | 1.178  | 0.0460 | 0.1287 | 0.0030 | 819  | 44  | 790  | 21 | 780  | 17 | 101.3 | 780        | 17 |
| 109 | 367  | 629  | 0.58 | 0.1221 | 0.0025 | 6.099  | 0.1144 | 0.3624 | 0.0061 | 1987 | 15  | 1990 | 16 | 1993 | 29 | 99.7  | 1987       | 15 |
| 110 | 213  | 472  | 0.45 | 0.1297 | 0.0039 | 6.463  | 0.1605 | 0.3614 | 0.0059 | 2094 | 53  | 2041 | 22 | 1989 | 28 | 105.3 | 2094       | 53 |
| 111 | 190  | 188  | 1.01 | 0.0739 | 0.0050 | 1.396  | 0.0862 | 0.1370 | 0.0050 | 1038 | 68  | 887  | 37 | 828  | 28 | 107.1 | 828        | 28 |
| 112 | 266  | 111  | 2.40 | 0.0572 | 0.0046 | 0.9313 | 0.0699 | 0.1182 | 0.0043 | 497  | 102 | 668  | 37 | 720  | 25 | 92.8  | 720        | 25 |
| 113 | 267  | 769  | 0.35 | 0.0718 | 0.0021 | 1.360  | 0.0363 | 0.1375 | 0.0024 | 979  | 28  | 872  | 16 | 830  | 14 | 105.1 | 830        | 14 |
| 115 | 226  | 178  | 1.27 | 0.1231 | 0.0037 | 5.678  | 0.1568 | 0.3345 | 0.0077 | 2002 | 22  | 1928 | 24 | 1860 | 37 | 107.6 | 2002       | 22 |
| 116 | 95   | 112  | 0.85 | 0.1140 | 0.0042 | 5.365  | 0.1840 | 0.3414 | 0.0093 | 1864 | 28  | 1879 | 29 | 1893 | 45 | 98.5  | 1864       | 28 |
| 117 | 182  | 152  | 1.20 | 0.0665 | 0.0045 | 1.227  | 0.0750 | 0.1338 | 0.0047 | 823  | 71  | 813  | 34 | 809  | 27 | 100.5 | 809        | 27 |
| 118 | 360  | 1206 | 0.30 | 0.2530 | 0.0049 | 20.577 | 0.2764 | 0.5898 | 0.0083 | 3204 | 31  | 3119 | 13 | 2989 | 33 | 107.2 | 3204       | 31 |
| 119 | 462  | 748  | 0.62 | 0.0782 | 0.0017 | 2.049  | 0.0406 | 0.1900 | 0.0028 | 1152 | 19  | 1132 | 14 | 1121 | 15 | 102.8 | 1152       | 19 |
| 120 | 62   | 50   | 1.24 | 0.0631 | 0.0080 | 1.014  | 0.1175 | 0.1165 | 0.0069 | 712  | 149 | 711  | 59 | 710  | 40 | 100.1 | 710        | 40 |
| 122 | 276  | 287  | 0.96 | 0.0674 | 0.0027 | 1.335  | 0.0487 | 0.1438 | 0.0031 | 849  | 42  | 861  | 21 | 866  | 17 | 99.4  | 866        | 17 |
| 123 | 415  | 207  | 2.01 | 0.0688 | 0.0038 | 1.157  | 0.0578 | 0.1219 | 0.0035 | 894  | 58  | 781  | 27 | 742  | 20 | 105.3 | 742        | 20 |
| 124 | 177  | 106  | 1.68 | 0.1278 | 0.0041 | 6.136  | 0.1821 | 0.3483 | 0.0086 | 2067 | 24  | 1995 | 26 | 1926 | 41 | 107.3 | 2067       | 24 |
| 125 | 156  | 387  | 0.40 | 0.1213 | 0.0023 | 5.819  | 0.1015 | 0.3478 | 0.0055 | 1976 | 14  | 1949 | 15 | 1924 | 26 | 102.7 | 1976       | 14 |
| 126 | 222  | 218  | 1.02 | 0.0664 | 0.0032 | 1.228  | 0.0543 | 0.1341 | 0.0034 | 820  | 51  | 814  | 25 | 811  | 19 | 100.4 | 811        | 19 |
| 127 | 541  | 841  | 0.64 | 0.0615 | 0.0035 | 0.8033 | 0.0441 | 0.0947 | 0.0016 | 657  | 126 | 599  | 25 | 583  | 9  | 102.7 | 583        | 9  |
| 128 | 220  | 747  | 0.29 | 0.0751 | 0.0029 | 1.750  | 0.0607 | 0.1689 | 0.0026 | 1072 | 78  | 1027 | 22 | 1006 | 14 | 106.6 | 1072       | 78 |
| 129 | 1024 | 727  | 1.41 | 0.0791 | 0.0017 | 2.032  | 0.0405 | 0.1863 | 0.0028 | 1175 | 19  | 1126 | 14 | 1101 | 15 | 106.7 | 1175       | 19 |
| 130 | 504  | 297  | 1.69 | 0.0697 | 0.0086 | 1.229  | 0.1473 | 0.1279 | 0.0035 | 920  | 266 | 814  | 67 | 776  | 20 | 104.9 | 776        | 20 |
| 131 | 900  | 198  | 4.56 | 0.1262 | 0.0028 | 6.060  | 0.1249 | 0.3482 | 0.0063 | 2045 | 16  | 1984 | 18 | 1926 | 30 | 106.2 | 2045       | 16 |
| 132 | 103  | 90   | 1.15 | 0.0677 | 0.0048 | 1.194  | 0.0772 | 0.1280 | 0.0047 | 858  | 76  | 798  | 36 | 776  | 27 | 102.8 | 776        | 27 |
| 133 | 134  | 97   | 1.38 | 0.1276 | 0.0040 | 6.691  | 0.1946 | 0.3803 | 0.0093 | 2065 | 23  | 2071 | 26 | 2078 | 43 | 99.4  | 2065       | 23 |
| 134 | 164  | 117  | 1.41 | 0.0684 | 0.0046 | 1.141  | 0.0724 | 0.1247 | 0.0043 | 818  | 76  | 773  | 34 | 757  | 25 | 102.1 | 757        | 25 |
| 135 | 140  | 698  | 0.20 | 0.1208 | 0.0026 | 5.852  | 0.1000 | 0.3513 | 0.0048 | 1969 | 40  | 1954 | 15 | 1941 | 23 | 101.4 | 1969       | 40 |
| 137 | 371  | 133  | 2.79 | 0.1204 | 0.0035 | 6.017  | 0.1602 | 0.3622 | 0.0080 | 1963 | 21  | 1978 | 23 | 1993 | 38 | 98.5  | 1963       | 21 |
| 138 | 468  | 165  | 2.84 | 0.0737 | 0.0038 | 1.259  | 0.0584 | 0.1239 | 0.0035 | 1033 | 51  | 827  | 26 | 753  | 20 | 109.8 | 753        | 20 |
| 139 | 187  | 280  | 0.67 | 0.0655 | 0.0028 | 1.153  | 0.0445 | 0.1276 | 0.0029 | 792  | 45  | 779  | 21 | 774  | 16 | 100.6 | 774        | 16 |
| 140 | 191  | 257  | 0.74 | 0.1201 | 0.0023 | 5.959  | 0.1076 | 0.3596 | 0.0058 | 1958 | 14  | 1970 | 16 | 1980 | 28 | 98.9  | 1958       | 14 |
| 141 | 196  | 296  | 0.66 | 0.0874 | 0.0023 | 2.799  | 0.0675 | 0.2320 | 0.0041 | 1370 | 22  | 1355 | 18 | 1345 | 22 | 101.9 | 1370       | 22 |
| 143 | 310  | 470  | 0.66 | 0.0688 | 0.0020 | 1.230  | 0.0321 | 0.1296 | 0.0022 | 892  | 28  | 814  | 15 | 786  | 12 | 103.6 | 786        | 12 |
| 144 | 243  | 395  | 0.62 | 0.2528 | 0.0029 | 21.763 | 0.2450 | 0.6239 | 0.0085 | 3203 | 10  | 3173 | 11 | 3125 | 34 | 102.5 | 3203       | 10 |
| 145 | 352  | 1239 | 0.28 | 0.1097 | 0.0023 | 4.362  | 0.0721 | 0.2884 | 0.0036 | 1794 | 38  | 1705 | 14 | 1634 | 18 | 109.8 | 1794       | 38 |
| 146 | 553  | 658  | 0.84 | 0.1629 | 0.0021 | 10.624 | 0.1269 | 0.4727 | 0.0062 | 2486 | 10  | 2491 | 11 | 2496 | 27 | 99.6  | 2486       | 10 |
| 150 | 327  | 264  | 1.24 | 0.0647 | 0.0030 | 1.167  | 0.0    |        |        |      |     |      |    |      |    |       |            |    |

|  |     |     |      |      |        |        |        |        |        |        |      |     |      |    |      |    |       |            |    |
|--|-----|-----|------|------|--------|--------|--------|--------|--------|--------|------|-----|------|----|------|----|-------|------------|----|
|  | 76  | 199 | 344  | 0.58 | 0.0682 | 0.0032 | 1.167  | 0.0504 | 0.1241 | 0.0031 | 875  | 49  | 785  | 24 | 754  | 18 | 104.1 | 754        | 18 |
|  | 77  | 325 | 257  | 1.27 | 0.0698 | 0.0030 | 1.196  | 0.0464 | 0.1244 | 0.0028 | 923  | 44  | 799  | 21 | 756  | 16 | 105.7 | 756        | 16 |
|  | 78  | 490 | 333  | 1.47 | 0.1314 | 0.0025 | 6.717  | 0.1182 | 0.3712 | 0.0060 | 2116 | 14  | 2075 | 16 | 2035 | 28 | 104.0 | 2116       | 14 |
|  | 80  | 296 | 479  | 0.62 | 0.0676 | 0.0022 | 1.189  | 0.0349 | 0.1278 | 0.0023 | 855  | 32  | 796  | 16 | 776  | 13 | 102.6 | 776        | 13 |
|  | 81  | 355 | 893  | 0.40 | 0.0744 | 0.0016 | 1.779  | 0.0344 | 0.1736 | 0.0025 | 1053 | 18  | 1038 | 13 | 1032 | 14 | 102.0 | 1053       | 18 |
|  | 82  | 141 | 379  | 0.37 | 0.0764 | 0.0027 | 1.635  | 0.0533 | 0.1554 | 0.0033 | 1105 | 34  | 984  | 21 | 931  | 18 | 105.7 | 931        | 18 |
|  | 83  | 129 | 435  | 0.30 | 0.1446 | 0.0036 | 7.909  | 0.1555 | 0.3968 | 0.0061 | 2282 | 44  | 2221 | 18 | 2154 | 28 | 105.9 | 2282       | 44 |
|  | 84  | 228 | 322  | 0.71 | 0.1565 | 0.0029 | 8.899  | 0.1529 | 0.4127 | 0.0069 | 2419 | 13  | 2328 | 16 | 2227 | 31 | 108.6 | 2419       | 13 |
|  | 86  | 27  | 640  | 0.04 | 0.1872 | 0.0034 | 12.281 | 0.1468 | 0.4757 | 0.0063 | 2718 | 30  | 2626 | 11 | 2509 | 28 | 108.3 | 2718       | 30 |
|  | 87  | 90  | 123  | 0.73 | 0.1239 | 0.0042 | 6.457  | 0.2024 | 0.3783 | 0.0097 | 2013 | 25  | 2040 | 28 | 2068 | 45 | 97.3  | 2013       | 25 |
|  | 89  | 69  | 256  | 0.27 | 0.0780 | 0.0032 | 1.675  | 0.0623 | 0.1559 | 0.0036 | 1147 | 39  | 999  | 24 | 934  | 20 | 107.0 | 934        | 20 |
|  | 90  | 315 | 484  | 0.65 | 0.0756 | 0.0021 | 1.701  | 0.0422 | 0.1634 | 0.0028 | 1084 | 25  | 1009 | 16 | 976  | 15 | 103.4 | 976        | 15 |
|  | 91  | 190 | 310  | 0.61 | 0.0649 | 0.0027 | 1.082  | 0.0410 | 0.1211 | 0.0027 | 769  | 44  | 745  | 20 | 737  | 15 | 101.1 | 737        | 15 |
|  | 92  | 733 | 1448 | 0.51 | 0.0741 | 0.0033 | 1.418  | 0.0600 | 0.1388 | 0.0022 | 1044 | 93  | 896  | 25 | 838  | 12 | 106.9 | 838        | 12 |
|  | 95  | 175 | 168  | 1.04 | 0.1233 | 0.0035 | 6.131  | 0.1618 | 0.3612 | 0.0079 | 2004 | 21  | 1995 | 23 | 1988 | 37 | 100.8 | 2004       | 21 |
|  | 96  | 133 | 90   | 1.48 | 0.0728 | 0.0063 | 1.262  | 0.0993 | 0.1259 | 0.0056 | 1008 | 90  | 829  | 45 | 764  | 32 | 108.5 | 764        | 32 |
|  | 99  | 76  | 135  | 0.56 | 0.1111 | 0.0035 | 5.188  | 0.1502 | 0.3391 | 0.0077 | 1817 | 24  | 1851 | 25 | 1882 | 37 | 96.5  | 1817       | 24 |
|  | 102 | 17  | 294  | 0.06 | 0.0606 | 0.0034 | 0.8043 | 0.0421 | 0.0964 | 0.0026 | 624  | 68  | 599  | 24 | 593  | 15 | 101.0 | 593        | 15 |
|  | 103 | 275 | 669  | 0.41 | 0.0688 | 0.0021 | 1.140  | 0.0314 | 0.1204 | 0.0021 | 892  | 30  | 773  | 15 | 733  | 12 | 105.5 | 733        | 12 |
|  | 104 | 490 | 1116 | 0.44 | 0.1650 | 0.0020 | 10.723 | 0.1228 | 0.4717 | 0.0060 | 2508 | 10  | 2499 | 11 | 2491 | 26 | 100.7 | 2508       | 10 |
|  | 105 | 486 | 395  | 1.23 | 0.0680 | 0.0028 | 1.199  | 0.0449 | 0.1280 | 0.0028 | 869  | 43  | 800  | 21 | 776  | 16 | 103.1 | 776        | 16 |
|  | 106 | 104 | 1132 | 0.09 | 0.0716 | 0.0023 | 1.409  | 0.0400 | 0.1427 | 0.0022 | 975  | 68  | 893  | 17 | 860  | 13 | 103.8 | 860        | 13 |
|  | 108 | 83  | 510  | 0.16 | 0.0682 | 0.0026 | 1.068  | 0.0373 | 0.1137 | 0.0024 | 875  | 39  | 738  | 18 | 694  | 14 | 106.3 | 694        | 14 |
|  | 110 | 97  | 75   | 1.30 | 0.0717 | 0.0065 | 1.215  | 0.1005 | 0.1230 | 0.0058 | 979  | 95  | 808  | 46 | 748  | 33 | 108.0 | 748        | 33 |
|  | 111 | 128 | 1027 | 0.12 | 0.0628 | 0.0018 | 0.8185 | 0.0213 | 0.0946 | 0.0015 | 701  | 29  | 607  | 12 | 583  | 9  | 104.1 | 583        | 9  |
|  | 112 | 246 | 624  | 0.39 | 0.1326 | 0.0020 | 6.569  | 0.0900 | 0.3597 | 0.0049 | 2132 | 11  | 2055 | 12 | 1981 | 23 | 107.6 | 2132       | 11 |
|  | 113 | 287 | 497  | 0.58 | 0.0725 | 0.0028 | 1.393  | 0.0492 | 0.1394 | 0.0030 | 1001 | 38  | 886  | 21 | 841  | 17 | 105.4 | 841        | 17 |
|  | 115 | 27  | 1356 | 0.02 | 0.0766 | 0.0020 | 1.590  | 0.0335 | 0.1506 | 0.0022 | 1111 | 52  | 966  | 13 | 904  | 12 | 106.9 | 904        | 12 |
|  | 118 | 173 | 369  | 0.47 | 0.1037 | 0.0023 | 4.292  | 0.0872 | 0.3004 | 0.0050 | 1692 | 17  | 1692 | 17 | 1693 | 25 | 99.9  | 1692       | 17 |
|  | 120 | 146 | 181  | 0.81 | 0.0697 | 0.0038 | 1.165  | 0.0583 | 0.1213 | 0.0035 | 921  | 58  | 784  | 27 | 738  | 20 | 106.2 | 738        | 20 |
|  | 122 | 111 | 195  | 0.57 | 0.0666 | 0.0035 | 1.163  | 0.0565 | 0.1268 | 0.0033 | 824  | 59  | 783  | 27 | 769  | 19 | 101.8 | 769        | 19 |
|  | 124 | 850 | 486  | 1.75 | 0.1714 | 0.0025 | 10.357 | 0.1422 | 0.4388 | 0.0063 | 2571 | 11  | 2467 | 13 | 2345 | 28 | 109.6 | 2571       | 11 |
|  | 125 | 225 | 272  | 0.83 | 0.0640 | 0.0027 | 1.180  | 0.0467 | 0.1338 | 0.0030 | 743  | 47  | 791  | 22 | 809  | 17 | 97.8  | 809        | 17 |
|  | 126 | 504 | 234  | 2.16 | 0.0663 | 0.0033 | 1.195  | 0.0553 | 0.1309 | 0.0033 | 815  | 56  | 798  | 26 | 793  | 19 | 100.6 | 793        | 19 |
|  | 127 | 466 | 239  | 1.95 | 0.0646 | 0.0032 | 1.135  | 0.0520 | 0.1276 | 0.0032 | 761  | 55  | 770  | 25 | 774  | 19 | 99.5  | 774        | 19 |
|  | 128 | 124 | 69   | 1.80 | 0.0701 | 0.0063 | 1.173  | 0.0965 | 0.1215 | 0.0052 | 931  | 100 | 788  | 45 | 739  | 30 | 106.6 | 739        | 30 |
|  | 131 | 592 | 643  | 0.92 | 0.1683 | 0.0020 | 11.177 | 0.1271 | 0.4820 | 0.0061 | 2541 | 9   | 2538 | 11 | 2536 | 26 | 100.2 | 2541       | 9  |
|  | 132 | 187 | 696  | 0.27 | 0.0782 | 0.0018 | 1.707  | 0.0352 | 0.1584 | 0.0024 | 1153 | 20  | 1011 | 13 | 948  | 13 | 106.6 | 948        | 13 |
|  | 133 | 671 | 467  | 1.44 | 0.0692 | 0.0026 | 1.202  | 0.0411 | 0.1260 | 0.0026 | 906  | 38  | 801  | 19 | 765  | 15 | 104.7 | 765        | 15 |
|  | 134 | 280 | 232  | 1.21 | 0.1093 | 0.0027 | 4.547  | 0.1029 | 0.3021 | 0.0055 | 1787 | 19  | 1740 | 19 | 1702 | 27 | 105.0 | 1787       | 19 |
|  | 135 | 76  | 1006 | 0.08 | 0.0703 | 0.0016 | 1.468  | 0.0311 | 0.1516 | 0.0022 | 936  | 21  | 917  | 13 | 910  | 13 | 100.8 | 910        | 13 |
|  | 137 | 217 | 1250 | 0.17 | 0.0763 | 0.0029 | 1.544  | 0.0537 | 0.1468 | 0.0023 | 1103 | 78  | 948  | 21 | 883  | 13 | 107.4 | 883        | 13 |
|  | 138 | 456 | 449  | 1.02 | 0.0735 | 0.0021 | 1.708  | 0.0449 | 0.1687 | 0.0029 | 1027 | 27  | 1011 | 17 | 1005 | 16 | 102.2 | 1027       | 27 |
|  | 140 | 136 | 308  | 0.44 | 0.0636 | 0.0033 | 0.8826 | 0.0419 | 0.1007 | 0.0026 | 728  | 59  | 642  | 23 | 619  | 15 | 103.7 | 619        | 15 |
|  | 141 | 158 | 172  | 0.92 | 0.0643 | 0.0049 | 0.7540 | 0.0523 | 0.0851 | 0.0030 | 752  | 87  | 571  | 30 | 527  | 18 | 108.3 | 527        | 18 |
|  | 142 | 292 | 734  | 0.40 | 0.0815 | 0.0018 | 2.126  | 0.0437 | 0.1893 | 0.0029 | 1234 | 19  | 1157 | 14 | 1118 | 16 | 110.4 | Discordant |    |
|  | 144 | 292 | 353  | 0.83 | 0.0652 | 0.0028 | 1.185  | 0.0466 | 0.1320 | 0.0030 | 780  | 46  | 794  | 22 | 799  | 17 | 99.4  | 799        | 17 |
|  | 145 | 100 | 288  | 0.35 | 0.0638 | 0.0033 | 0.9364 | 0.0439 | 0.1065 | 0.0027 | 735  | 57  | 671  | 23 | 653  | 16 | 102.8 | 653        | 16 |
|  | 146 | 469 | 1015 | 0.46 | 0.0738 | 0.0015 | 1.766  | 0.0334 | 0.1738 | 0.0024 | 1035 | 18  | 1033 | 12 | 1033 | 13 | 100.2 | 1035       | 18 |
|  | 148 | 429 | 533  | 0.81 | 0.0695 | 0.0024 | 1.183  | 0.0368 | 0.1236 | 0.0024 | 912  | 34  | 793  | 17 | 751  | 14 | 105.6 | 751        | 14 |
|  | 149 | 301 | 470  | 0.64 | 0.0883 | 0.0021 | 2.822  | 0.0617 | 0.2322 | 0.0038 | 1388 | 20  | 1361 | 16 | 1346 | 20 | 103.1 | 1388       | 20 |
|  | 150 | 109 | 204  | 0.54 | 0.0667 | 0.0072 | 1.111  | 0.1138 | 0.1208 | 0.0038 | 828  | 234 | 758  | 55 | 735  | 22 | 103.1 | 735        | 22 |

Note:

\* Age discordance is reported by (207Pb/235U age)/(206Pb/238U age)\*100 if 206Pb/238U age <1000 Ma, otherwise by (207Pb/206Pb age)/(206Pb/238U age)\*100.

<sup>#</sup> Preferred age for analyses with discordance between 90 and 100 is determined by 206Pb/238U age if it is younger than 1000 Ma, otherwise by 207Pb/206Pb age. Discordant analyses are not included for age spectrum plot.

## REFERENCES

- Bai, J., Li, Z., Xu, X., Li, T., Ru, Y., Li, X., 2015. Detrital zircon U-Pb dating of Dahalajunshan Formation in Wusun Mountain region, western Tianshan, and its geological implications. *Geol. China* 42, 85–95.
- Carroll, A.R., Dumitru, T.A., Graham, S.A., Hendrix, M.S., 2013. An 800 million-year detrital zircon record of continental amalgamation: Tarim basin, NW China. *Int. Geol. Rev.* 55, 818–829. <https://doi.org/10.1080/00206814.2013.787232>
- Chang, J., Qiu, N., Li, H., 2012. U–Pb Dating of Detrital Zircon from Lower Silurian in Keping Area of Tarim Basin and Its Geological Implication. *Journal of Earth Sciences and Environment*. *J. Earth Sci. Environ.* 34, 32–43.
- Dong, S., Li, Z., Jiang, L., 2016. The Ordovician–Silurian tectonic evolution of the northeastern margin of the Tarim block, NW China: Constraints from detrital zircon geochronological records. *J. Asian Earth Sci.* 122, 1–19. <https://doi.org/10.1016/j.jseas.2016.01.016>
- Dong, S., Li, Z., Xu, J., Gao, J., Guo, C., 2014. Detrital zircon U–Pb geochronology and Hf isotopic compositions of Middle–Upper Ordovician sandstones from the Qurqutagh area, eastern Tarim Basin: implications for sedimentary provenance and tectonic evolution. *J. Metamorphic Geol.* 32, 1–15. <https://doi.org/10.1111/j.1365-3113.2013.05411.x>
- Han, Y., Zhao, G., Cawood, P.A., Sun, M., Eizenhöfer, P.R., Hou, W., Zhang, X., 2016a. Tarim and North China cratons linked to northern Gondwana through switching accretionary tectonics and collisional orogenesis 95–98. <https://doi.org/10.1111/j.1365-3113.2016.05411.x>
- Han, Y., Zhao, G., Sun, M., Eizenhöfer, P.R., Hou, W., Zhang, X., Liu, D., Wang, B., Zhang, G., 2015. Paleozoic accretionary orogenesis in the Paleo-Asian Ocean: Insights from detrital zircons from Silurian to Carboniferous strata at the northwestern margin of the Tarim Basin. *J. Metamorphic Geol.* 33, 1–15. <https://doi.org/10.1111/j.1365-3113.2015.05411.x>
- Han, Y., Zhao, G., Sun, M., Eizenhöfer, P.R., Hou, W., Zhang, X., Liu, Q., Wang, B., Liu, D., Xu, B., 2016b. Late Paleozoic subduction and collision processes during the amalgamation of the Central Asian Orogenic Belt along the South Tianshan suture zone. *J. Metamorphic Geol.* 34, 1–15. <https://doi.org/10.1111/j.1365-3113.2016.05411.x>
- Hegner, E., Klemd, R., Kröner, A., Corsini, M., Alexeev, D. V., Iaccheri, L.M., Zack, T., Dulski, P., Xia, X., Windley, B.F., 2010. Mineral ages and p–t conditions of late paleozoic high-pressure eclogite and provenance of mélange sediments from the Atabashi Complex, South Tianshan, Kyrgyzstan. *J. Metamorphic Geol.* 28, 1–15. <https://doi.org/10.1111/j.1365-3113.2010.05411.x>
- Huang, H., Cawood, P.A., Ni, S., Hou, M., Shi, Z., Hu, X., 2018. Provenance of late Paleozoic strata in the Yili Basin: Implications for tectonic evolution of the South Tianshan orogenic belt. *GSA Bull.* 130, 952–974. <https://doi.org/10.1130/b31588.1>
- Li, L., Yang, B., Yin, Y., Liu, L., Wang, B., 2017. Provenance Analysis from Early Silurian Kepingstage Formation in Keping Area, Xinjiang: Constraints from Geochemical Characteristics and Zircon U–Pb Geochronology. *Geol. Sci. Technol.* 36, 1–15. <https://doi.org/10.1111/j.1365-3113.2017.05411.x>
- Li, S., Yang, D., Wang, S., Wan, Q., Wang, D., 2014. Characteristics of Petrology, Geochemistry, Heavy Minerals and Isotope Chronology of Upper Carboniferous Detrital Rocks in the Middle Segment of South Tianshan and Constraints to the Provenance. *J. Metamorphic Geol.* 32, 1–15. <https://doi.org/10.1111/j.1365-3113.2014.05411.x>
- Liu, D., Guo, Z., Jollivet, M., Cheng, F., Song, Y., Zhang, Z., 2014. Petrology and geochemistry of Early Permian volcanic rocks in South Tian Shan, NW China: implications for the tectonic evolution and Phanerozoic continental growth. *Int. J. Earth Sci.* 145, 1445–1460. <https://doi.org/10.1016/j.jseas.2014.01.016>
- Liu, J.Y., Yang, H.J., Yang, Y.H., Cai, Z.Z., Liu, Y.Q., Rui, Z.F., Su, Z.Z., 2012. The U–Pb chronologic evidence and sedimentary responses of Silurian tectonic activities at northeastern margin of Tarim Basin. *Sci. China Earth Sci.* 55, 1445–1460. <https://doi.org/10.1016/j.jseas.2012.01.016>
- Liu, X., Su, W., Gao, J., Li, J., Jiang, T., Zhang, X., Ge, X., 2014. Paleozoic subduction erosion involving accretionary wedge sediments in the South Tianshan Orogen: Evidence from geochronological and geochemical studies on eclogites and their host rocks. *J. Metamorphic Geol.* 32, 1–15. <https://doi.org/10.1111/j.1365-3113.2014.05411.x>
- Ma, X., Shu, L., Jahn, B.M., Zhu, W., Faure, M., 2012a. Precambrian tectonic evolution of central tianshan, NW China: Constraints from U–Pb dating and in situ Hf isotopic analysis of detrital zircons. *Precambrian Res.* 222–223, 450–473. <https://doi.org/10.1016/j.jseas.2012.01.016>
- Ma, X., Shu, L., Santosh, M., Li, J., 2012b. Detrital zircon U–Pb geochronology and Hf isotope data from Central Tianshan suggesting a link with the Tarim Block: Implications on Proterozoic supercontinent history. *Precambrian Res.* 206–207, 1–16. <https://doi.org/10.1016/j.jseas.2012.01.016>
- Rojas-Agramonte, Y., Kröner, A., Alexeev, D. V., Jeffreys, T., Khudoley, A.K., Wong, J., Geng, H., Shu, L., Semiletin, S.A., Mikolaichuk, A. V., Kiselev, V. V., Yang, J., Seltmann, R., 2014. Detrital and igneous zircon ages for supracrustal rocks
